# Supplementary material for: Fifteen-MiRNA-Based Signature Is a Reliable Prognosis-Predicting Tool for Prostate Cancer Patients
Source: PubMed Central journal article supplement (PMC7738977; doi:10.7150/ijms.49412), 2021-01-01
Supplement: ijmsv18p0284s1.pdf [file ijmsv18p0284s1.pdf]

**Fig. S1**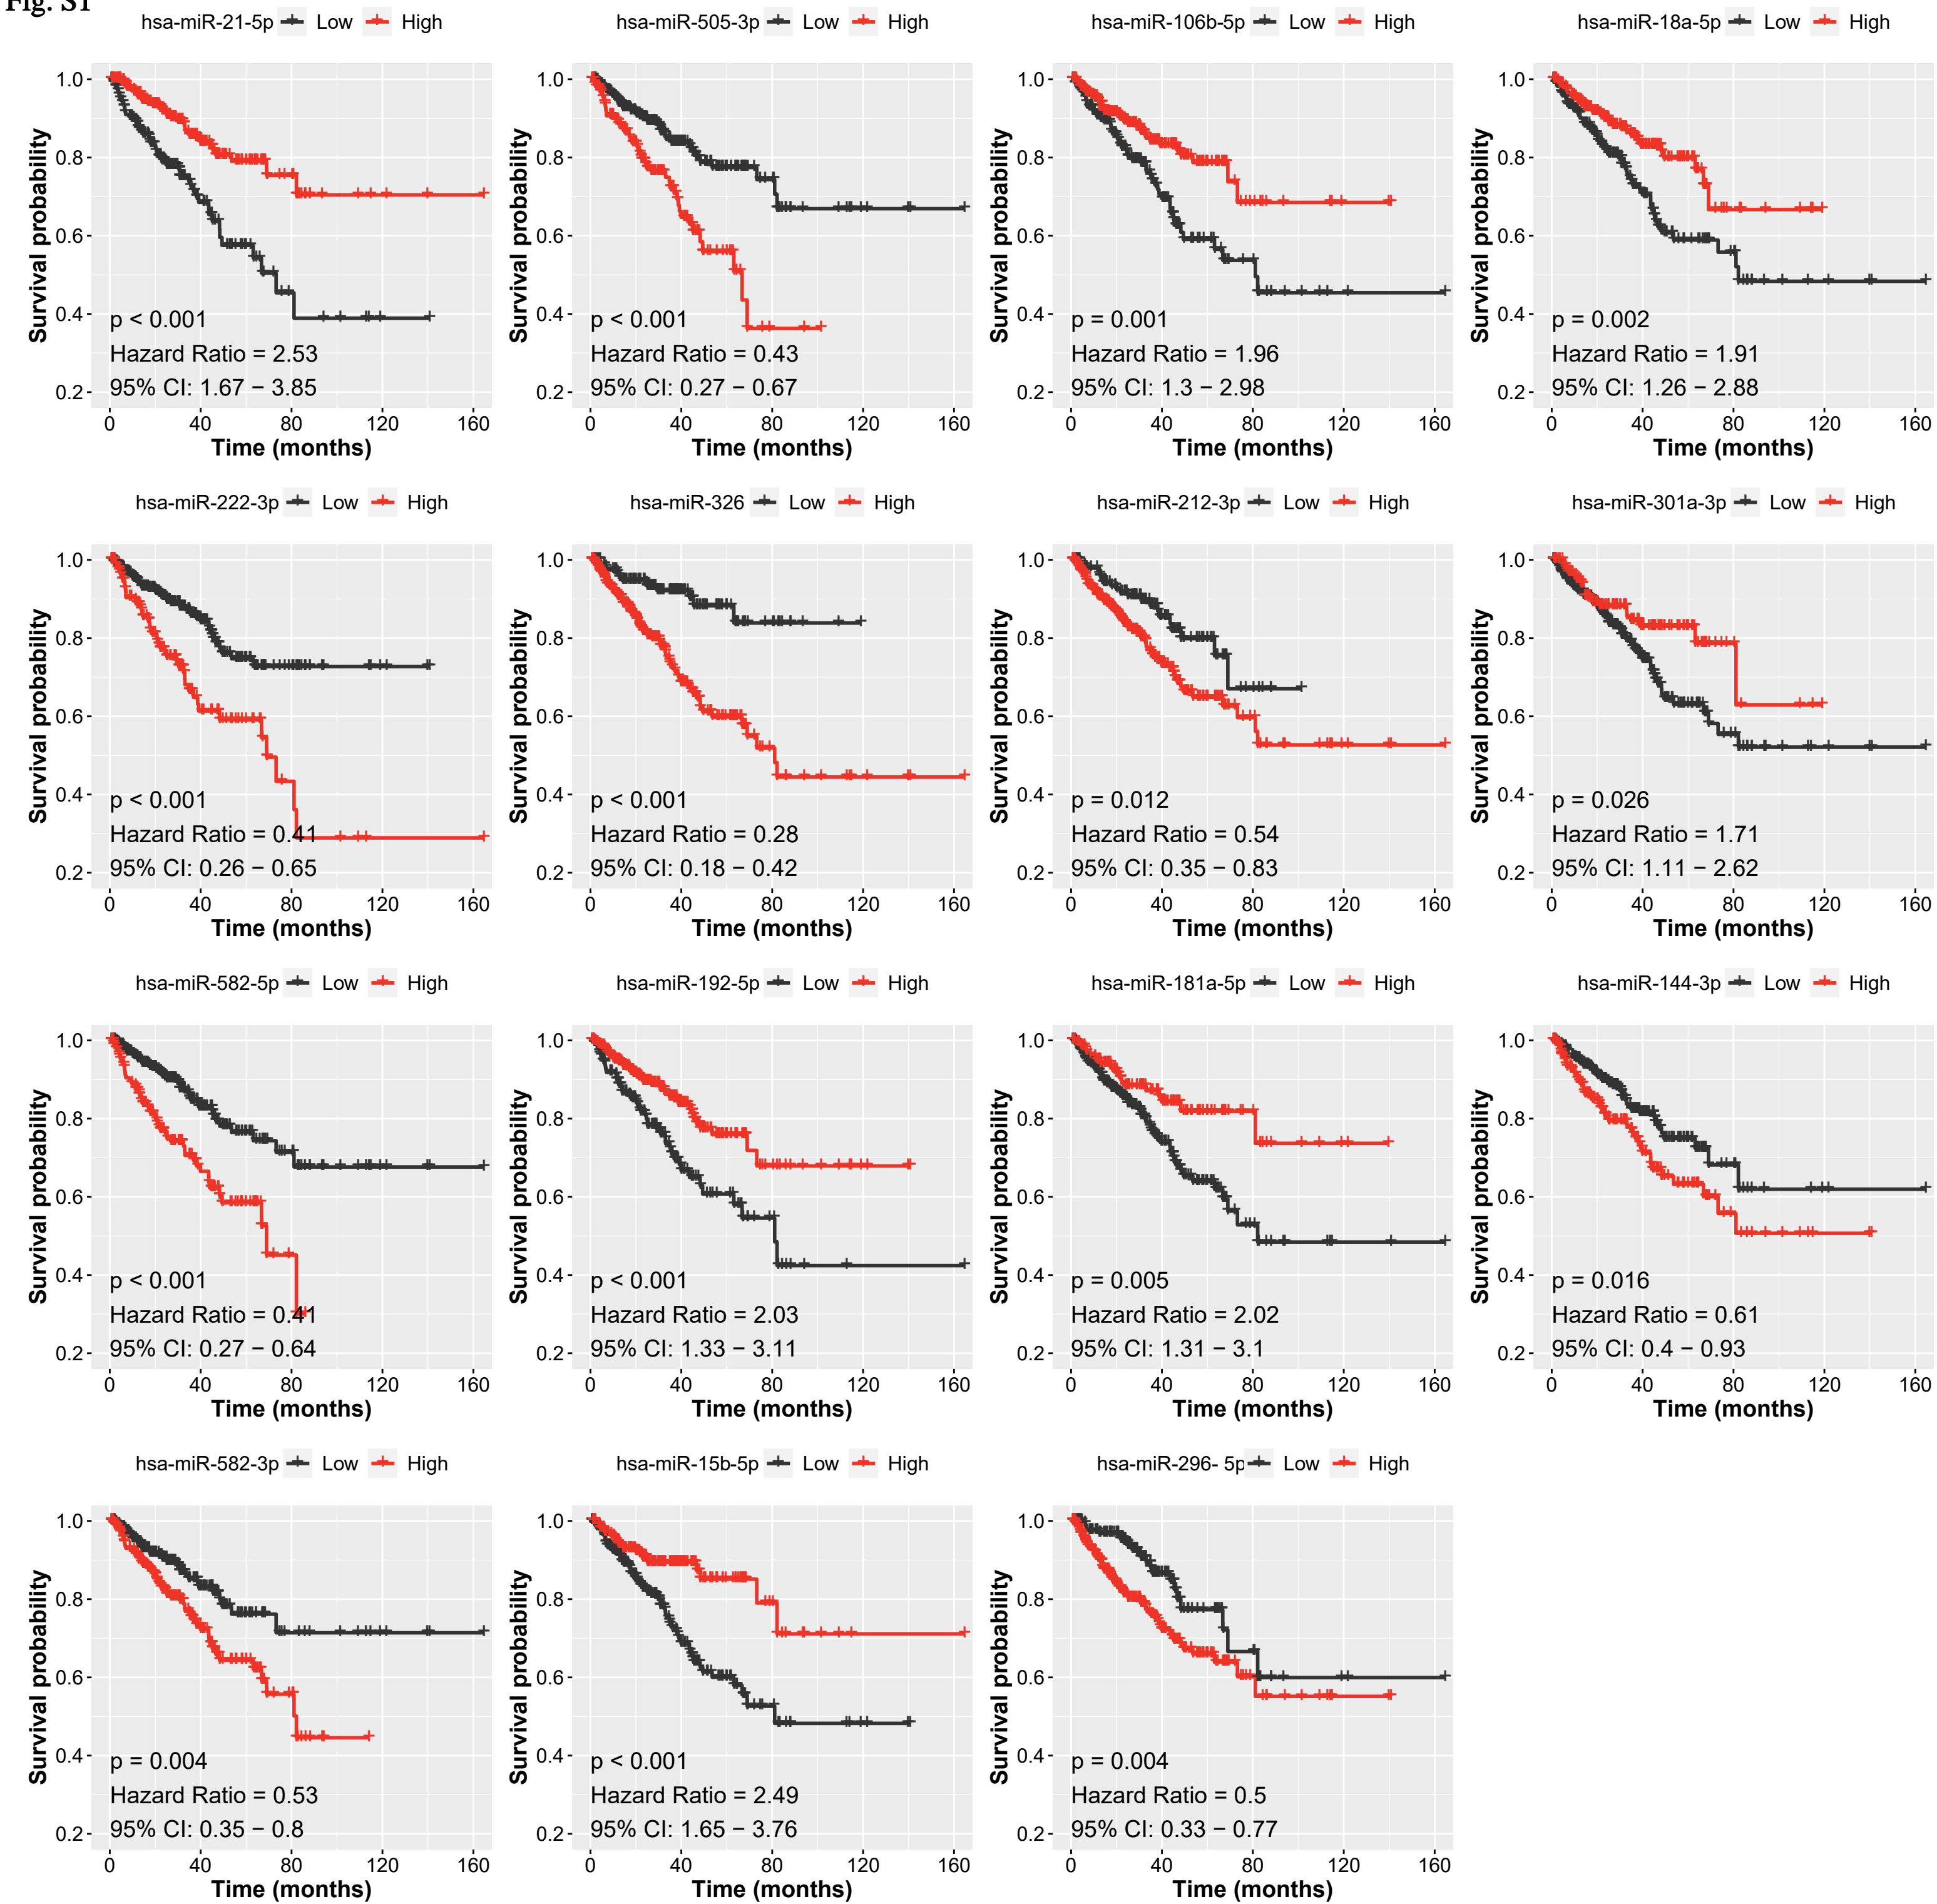

**Table S1. Univariate Cox regression analysis**

| <b>ID</b>       | <b>HR</b>   | <b>HR.95L</b> | <b>HR.95H</b> | <b>P-value</b> |
|-----------------|-------------|---------------|---------------|----------------|
| hsa-miR-133b    | 0.720738915 | 0.62978066    | 0.824834131   | 1.96E-06       |
| hsa-miR-21-5p   | 2.293514183 | 1.592331035   | 3.303463408   | 8.24E-06       |
| hsa-miR-222-3p  | 0.585724692 | 0.462117875   | 0.742393734   | 9.73E-06       |
| hsa-miR-221-3p  | 0.628602924 | 0.507618311   | 0.778422739   | 2.08E-05       |
| hsa-miR-582-5p  | 0.645496672 | 0.51020291    | 0.816667143   | 2.65E-04       |
| hsa-miR-582-3p  | 0.675577214 | 0.546044109   | 0.835838286   | 3.05E-04       |
| hsa-miR-93-5p   | 1.695080001 | 1.268729222   | 2.264704052   | 3.57E-04       |
| hsa-miR-505-3p  | 0.460602165 | 0.300346276   | 0.706365855   | 3.80E-04       |
| hsa-miR-326     | 0.708320169 | 0.585514537   | 0.856883014   | 3.85E-04       |
| hsa-miR-192-5p  | 1.641562675 | 1.240710109   | 2.171923962   | 5.21E-04       |
| hsa-miR-15b-5p  | 1.733520666 | 1.269259777   | 2.367595627   | 5.42E-04       |
| hsa-miR-106b-5p | 1.84326764  | 1.298327947   | 2.616931724   | 6.26E-04       |
| hsa-miR-15a-5p  | 1.802478532 | 1.268596612   | 2.561041729   | 1.01E-03       |
| hsa-miR-212-3p  | 0.668049262 | 0.523381727   | 0.852704239   | 1.20E-03       |
| hsa-miR-125b-5p | 0.571318312 | 0.403289376   | 0.809355843   | 1.63E-03       |
| hsa-miR-145-5p  | 0.682341218 | 0.537284107   | 0.866561159   | 1.72E-03       |
| hsa-miR-181a-5p | 1.920562213 | 1.276906054   | 2.888669221   | 1.73E-03       |
| hsa-miR-139-3p  | 0.740017771 | 0.612110877   | 0.894652134   | 1.87E-03       |
| hsa-miR-96-5p   | 1.443203983 | 1.138950253   | 1.8287346     | 2.39E-03       |
| hsa-miR-425-5p  | 1.463095931 | 1.137365826   | 1.882111855   | 3.06E-03       |
| hsa-miR-103a-3p | 1.722867468 | 1.185288851   | 2.504260721   | 4.36E-03       |
| hsa-miR-194-5p  | 1.644620377 | 1.160384484   | 2.330931017   | 5.18E-03       |
| hsa-miR-296-5p  | 0.737652508 | 0.595443167   | 0.913825621   | 5.36E-03       |
| hsa-miR-574-3p  | 0.56563673  | 0.378516348   | 0.845260481   | 5.43E-03       |
| hsa-miR-197-3p  | 1.791313075 | 1.158605756   | 2.769537882   | 8.74E-03       |
| hsa-miR-18a-5p  | 1.390670331 | 1.086602533   | 1.779826488   | 8.80E-03       |
| hsa-miR-301a-3p | 1.513363103 | 1.109956508   | 2.063385245   | 8.81E-03       |
| hsa-miR-144-3p  | 0.775094694 | 0.63935999    | 0.939645573   | 9.49E-03       |
| hsa-miR-499a-5p | 0.742178868 | 0.58962091    | 0.934209528   | 1.11E-02       |
| hsa-miR-374b-5p | 0.640525137 | 0.445678711   | 0.920556537   | 1.61E-02       |
| hsa-miR-139-5p  | 0.716812304 | 0.544524247   | 0.943612488   | 1.76E-02       |
| hsa-miR-501-3p  | 1.352284183 | 1.053356516   | 1.736043289   | 1.79E-02       |
| hsa-miR-20a-5p  | 1.326580997 | 1.048824453   | 1.677894845   | 1.84E-02       |
| hsa-miR-204-5p  | 0.789253804 | 0.64822533    | 0.960964557   | 1.85E-02       |
| hsa-miR-378a-3p | 0.745947036 | 0.578709935   | 0.96151275    | 2.36E-02       |
| hsa-miR-127-3p  | 0.743513836 | 0.574403696   | 0.962411677   | 2.44E-02       |
| hsa-miR-379-5p  | 0.739702657 | 0.568561563   | 0.962358445   | 2.47E-02       |
| hsa-miR-100-5p  | 0.759486357 | 0.597232857   | 0.965820148   | 2.49E-02       |
| hsa-miR-32-5p   | 1.332825315 | 1.033925138   | 1.71813534    | 2.66E-02       |
| hsa-miR-206     | 0.912011794 | 0.840357077   | 0.989776294   | 2.74E-02       |
| hsa-miR-143-3p  | 0.795058475 | 0.648442202   | 0.974825476   | 2.74E-02       |
| hsa-miR-340-5p  | 1.343138747 | 1.031143153   | 1.749535638   | 2.87E-02       |
| hsa-miR-29c-3p  | 0.665938892 | 0.458238739   | 0.9677807     | 3.30E-02       |
| hsa-miR-484     | 1.507598077 | 1.031995985   | 2.202384501   | 3.38E-02       |
| hsa-miR-30e-5p  | 0.582486266 | 0.351635617   | 0.964891591   | 3.58E-02       |
| hsa-miR-660-5p  | 1.40741484  | 1.01594792    | 1.949722511   | 3.99E-02       |
| hsa-let-7g-5p   | 1.619858131 | 1.014009828   | 2.58768731    | 4.36E-02       |
| hsa-miR-454-3p  | 1.366727103 | 1.007873433   | 1.853350742   | 4.44E-02       |
| hsa-miR-199a-5p | 1.45987879  | 1.006115388   | 2.118291904   | 4.64E-02       |
| hsa-miR-126-3p  | 1.345779132 | 0.997946619   | 1.814848046   | 5.16E-02       |
| hsa-miR-324-3p  | 0.738321749 | 0.543606386   | 1.002782562   | 5.21E-02       |
| hsa-miR-182-5p  | 1.236027152 | 0.994619182   | 1.53602821    | 5.60E-02       |
| hsa-miR-151a-5p | 1.448412544 | 0.986911713   | 2.125720943   | 5.84E-02       |
| hsa-miR-183-5p  | 1.232995826 | 0.992002945   | 1.53253447    | 5.91E-02       |
| hsa-miR-34b-3p  | 1.175080236 | 0.993489335   | 1.38986249    | 5.96E-02       |
| hsa-miR-26a-5p  | 0.670675561 | 0.442232416   | 1.017125139   | 6.01E-02       |

|                 |             |             |             |          |
|-----------------|-------------|-------------|-------------|----------|
| hsa-miR-23b-3p  | 0.702749013 | 0.485577441 | 1.017049258 | 6.14E-02 |
| hsa-miR-1224-5p | 1.223336401 | 0.990381936 | 1.51108567  | 6.14E-02 |
| hsa-miR-29a-3p  | 0.679711928 | 0.451801141 | 1.02259216  | 6.39E-02 |
| hsa-miR-16-5p   | 1.51963657  | 0.961601099 | 2.401510674 | 7.31E-02 |
| hsa-miR-148b-3p | 1.547150171 | 0.956818207 | 2.501701611 | 7.51E-02 |
| hsa-miR-106a-5p | 1.187020401 | 0.979118959 | 1.439066642 | 8.10E-02 |
| hsa-miR-483-5p  | 0.769336951 | 0.567955906 | 1.042121999 | 9.04E-02 |
| hsa-miR-654-3p  | 0.799309909 | 0.614945596 | 1.038947729 | 9.41E-02 |
| hsa-miR-491-5p  | 0.813512099 | 0.638558774 | 1.036399407 | 9.48E-02 |
| hsa-miR-615-3p  | 1.147970034 | 0.97624354  | 1.349904144 | 9.51E-02 |
| hsa-miR-141-3p  | 1.214963924 | 0.966070211 | 1.527981424 | 9.59E-02 |
| hsa-miR-19a-3p  | 1.198640527 | 0.968085402 | 1.484103686 | 9.64E-02 |
| hsa-miR-135a-5p | 0.832008261 | 0.668023047 | 1.036248299 | 1.01E-01 |
| hsa-miR-146b-5p | 1.214297277 | 0.957408575 | 1.540113506 | 1.09E-01 |
| hsa-miR-532-3p  | 0.774686923 | 0.565927325 | 1.060453883 | 1.11E-01 |
| hsa-miR-542-5p  | 0.843926868 | 0.683558525 | 1.041918917 | 1.15E-01 |
| hsa-miR-940     | 1.198356677 | 0.954609855 | 1.504340981 | 1.19E-01 |
| hsa-miR-432-5p  | 0.814352932 | 0.627571038 | 1.056726104 | 1.22E-01 |
| hsa-miR-766-3p  | 0.788053926 | 0.58196306  | 1.067127854 | 1.24E-01 |
| hsa-miR-132-3p  | 0.740690573 | 0.504979743 | 1.086424818 | 1.25E-01 |
| hsa-miR-218-5p  | 0.741863221 | 0.506200756 | 1.087238672 | 1.26E-01 |
| hsa-miR-18b-5p  | 1.167162809 | 0.955674913 | 1.425452321 | 1.30E-01 |
| hsa-miR-185-5p  | 1.374403296 | 0.910891462 | 2.073775526 | 1.30E-01 |
| hsa-miR-423-5p  | 1.230151314 | 0.935085134 | 1.618325647 | 1.39E-01 |
| hsa-miR-338-5p  | 0.867577029 | 0.717935846 | 1.048408301 | 1.41E-01 |
| hsa-miR-129-5p  | 1.116902451 | 0.96215199  | 1.296542644 | 1.46E-01 |
| hsa-miR-199b-5p | 1.249846034 | 0.924793392 | 1.68915038  | 1.47E-01 |
| hsa-miR-671-5p  | 1.18907604  | 0.936825068 | 1.509248502 | 1.55E-01 |
| hsa-miR-155-5p  | 0.839074216 | 0.658207554 | 1.069640625 | 1.57E-01 |
| hsa-miR-30a-5p  | 0.814997222 | 0.613160219 | 1.083273916 | 1.59E-01 |
| hsa-miR-526b-5p | 1.17109755  | 0.938903308 | 1.460714282 | 1.61E-01 |
| hsa-miR-423-3p  | 1.362943863 | 0.876679413 | 2.118922774 | 1.69E-01 |
| hsa-miR-550a-5p | 0.848621793 | 0.671097345 | 1.073106535 | 1.70E-01 |
| hsa-miR-99a-5p  | 0.79324401  | 0.569333575 | 1.105215091 | 1.71E-01 |
| hsa-miR-374a-5p | 0.780045458 | 0.543637833 | 1.119257859 | 1.78E-01 |
| hsa-miR-25-3p   | 1.294833122 | 0.888659517 | 1.886653755 | 1.79E-01 |
| hsa-let-7f-5p   | 1.171846281 | 0.924858067 | 1.484793998 | 1.89E-01 |
| hsa-miR-451a    | 0.876072695 | 0.717011773 | 1.070419477 | 1.96E-01 |
| hsa-miR-150-5p  | 0.872782481 | 0.709846909 | 1.073117667 | 1.97E-01 |
| hsa-miR-338-3p  | 1.130174845 | 0.937886137 | 1.361887259 | 1.98E-01 |
| hsa-miR-181b-5p | 1.319641328 | 0.861626143 | 2.021123951 | 2.02E-01 |
| hsa-miR-455-3p  | 0.857632258 | 0.677094684 | 1.086307584 | 2.03E-01 |
| hsa-miR-877-5p  | 1.172677713 | 0.917556098 | 1.498734543 | 2.03E-01 |
| hsa-miR-19b-3p  | 1.171601331 | 0.914066044 | 1.501696389 | 2.11E-01 |
| hsa-miR-299-5p  | 0.869402283 | 0.695787517 | 1.086337871 | 2.18E-01 |
| hsa-miR-125a-5p | 0.787787092 | 0.538059591 | 1.153419643 | 2.20E-01 |
| hsa-miR-339-3p  | 1.251212024 | 0.873831669 | 1.791571062 | 2.21E-01 |
| hsa-miR-361-5p  | 1.466671496 | 0.793258395 | 2.711758602 | 2.22E-01 |
| hsa-let-7e-5p   | 1.220179092 | 0.886355318 | 1.67972932  | 2.22E-01 |
| hsa-miR-376a-3p | 0.8530169   | 0.65772077  | 1.106302043 | 2.31E-01 |
| hsa-miR-502-5p  | 0.871984791 | 0.695765692 | 1.092835539 | 2.34E-01 |
| hsa-miR-214-3p  | 0.866843117 | 0.684522673 | 1.097724034 | 2.36E-01 |
| hsa-miR-149-5p  | 1.126725201 | 0.922390963 | 1.376324931 | 2.43E-01 |
| hsa-miR-342-3p  | 1.230451799 | 0.867642285 | 1.744972156 | 2.45E-01 |
| hsa-miR-377-3p  | 1.151753291 | 0.903941117 | 1.467502273 | 2.53E-01 |
| hsa-miR-491-3p  | 1.148838425 | 0.902744215 | 1.462019589 | 2.59E-01 |
| hsa-miR-652-3p  | 1.253991827 | 0.841122433 | 1.869520347 | 2.67E-01 |
| hsa-miR-28-3p   | 0.803914294 | 0.542647768 | 1.190971805 | 2.76E-01 |

|                 |             |             |             |          |
|-----------------|-------------|-------------|-------------|----------|
| hsa-miR-130b-3p | 1.16112052  | 0.883207325 | 1.52648288  | 2.85E-01 |
| hsa-miR-92b-3p  | 0.866776837 | 0.666468238 | 1.127288657 | 2.86E-01 |
| hsa-miR-455-5p  | 0.867574441 | 0.668004035 | 1.126767762 | 2.87E-01 |
| hsa-miR-363-3p  | 1.121566938 | 0.904505002 | 1.390719117 | 2.96E-01 |
| hsa-miR-148a-3p | 0.846719458 | 0.614618347 | 1.166469963 | 3.09E-01 |
| hsa-miR-7-5p    | 1.102093073 | 0.906389504 | 1.34005208  | 3.30E-01 |
| hsa-miR-330-3p  | 0.888680677 | 0.69403738  | 1.137911832 | 3.49E-01 |
| hsa-miR-769-5p  | 1.203988887 | 0.81191378  | 1.785398    | 3.56E-01 |
| hsa-miR-151a-3p | 0.83125501  | 0.560043618 | 1.233805492 | 3.59E-01 |
| hsa-miR-424-5p  | 0.897883761 | 0.710485777 | 1.134709903 | 3.67E-01 |
| hsa-miR-539-5p  | 0.907740951 | 0.733685515 | 1.123088321 | 3.73E-01 |
| hsa-miR-497-5p  | 1.166412729 | 0.819822983 | 1.659527341 | 3.92E-01 |
| hsa-miR-502-3p  | 0.852844127 | 0.591040427 | 1.230614814 | 3.95E-01 |
| hsa-miR-140-3p  | 1.193016744 | 0.792145997 | 1.796750796 | 3.98E-01 |
| hsa-miR-331-3p  | 0.912454177 | 0.735028205 | 1.132708404 | 4.06E-01 |
| hsa-miR-382-5p  | 1.149007598 | 0.824499815 | 1.601235604 | 4.12E-01 |
| hsa-miR-590-5p  | 1.137816827 | 0.83530407  | 1.549887256 | 4.13E-01 |
| hsa-miR-205-5p  | 0.964730784 | 0.884410983 | 1.052345011 | 4.18E-01 |
| hsa-miR-33b-5p  | 0.933235812 | 0.787437833 | 1.106029002 | 4.25E-01 |
| hsa-miR-337-3p  | 1.133826281 | 0.831572536 | 1.545940951 | 4.27E-01 |
| hsa-miR-10b-5p  | 1.094313352 | 0.872067637 | 1.373198203 | 4.36E-01 |
| hsa-miR-92a-3p  | 1.151777051 | 0.801775733 | 1.654565385 | 4.45E-01 |
| hsa-miR-193b-3p | 1.110669515 | 0.845115697 | 1.459666144 | 4.52E-01 |
| hsa-miR-27a-3p  | 1.164404463 | 0.772248556 | 1.755701249 | 4.68E-01 |
| hsa-miR-483-3p  | 1.075403764 | 0.883693508 | 1.308704032 | 4.68E-01 |
| hsa-miR-30b-5p  | 1.107744917 | 0.838716893 | 1.463066752 | 4.71E-01 |
| hsa-miR-421     | 0.915788143 | 0.718676656 | 1.166961409 | 4.77E-01 |
| hsa-miR-23a-3p  | 0.859316095 | 0.565096673 | 1.306721817 | 4.78E-01 |
| hsa-miR-200b-3p | 0.958315387 | 0.851561848 | 1.07845177  | 4.80E-01 |
| hsa-miR-409-3p  | 0.889091851 | 0.63962343  | 1.235858916 | 4.84E-01 |
| hsa-miR-625-5p  | 1.092319852 | 0.849326555 | 1.404833808 | 4.92E-01 |
| hsa-miR-769-3p  | 0.917218071 | 0.709726312 | 1.185371002 | 5.09E-01 |
| hsa-miR-181c-5p | 1.119858013 | 0.80006749  | 1.567470226 | 5.09E-01 |
| hsa-miR-34a-5p  | 0.883694685 | 0.606326167 | 1.287947541 | 5.20E-01 |
| hsa-miR-154-5p  | 0.925754363 | 0.726496594 | 1.179662984 | 5.33E-01 |
| hsa-miR-196b-5p | 0.914591579 | 0.681557055 | 1.227304083 | 5.52E-01 |
| hsa-miR-33a-5p  | 1.051569618 | 0.887694789 | 1.245696916 | 5.61E-01 |
| hsa-miR-107     | 1.122202785 | 0.750585675 | 1.677808588 | 5.74E-01 |
| hsa-miR-24-3p   | 0.910922734 | 0.645805549 | 1.284876274 | 5.95E-01 |
| hsa-miR-744-5p  | 1.086194962 | 0.80023689  | 1.474337799 | 5.96E-01 |
| hsa-miR-193a-3p | 1.075195312 | 0.814150319 | 1.419940435 | 6.09E-01 |
| hsa-miR-532-5p  | 1.102511158 | 0.739666691 | 1.643349455 | 6.32E-01 |
| hsa-miR-193a-5p | 0.923350483 | 0.655900338 | 1.299856191 | 6.48E-01 |
| hsa-miR-500a-5p | 1.063943354 | 0.808296752 | 1.400445391 | 6.58E-01 |
| hsa-miR-760     | 0.942724207 | 0.720236017 | 1.233941248 | 6.68E-01 |
| hsa-miR-629-5p  | 0.944130104 | 0.724610182 | 1.230153366 | 6.70E-01 |
| hsa-miR-29b-3p  | 1.090286843 | 0.72627228  | 1.636748962 | 6.77E-01 |
| hsa-miR-361-3p  | 1.092792864 | 0.71760733  | 1.664136073 | 6.79E-01 |
| hsa-miR-365a-3p | 1.064068603 | 0.776971319 | 1.457250692 | 6.99E-01 |
| hsa-miR-429     | 1.022407278 | 0.912369731 | 1.145716047 | 7.03E-01 |
| hsa-miR-224-5p  | 0.962582136 | 0.784946538 | 1.180417167 | 7.14E-01 |
| hsa-miR-186-5p  | 0.88517508  | 0.460959353 | 1.699791787 | 7.14E-01 |
| hsa-miR-584-5p  | 1.05128133  | 0.791407665 | 1.396489426 | 7.30E-01 |
| hsa-miR-335-5p  | 0.960792533 | 0.761850274 | 1.211684661 | 7.35E-01 |
| hsa-miR-485-3p  | 0.958777537 | 0.750411769 | 1.224999932 | 7.36E-01 |
| hsa-miR-142-3p  | 1.033794178 | 0.851828933 | 1.254630315 | 7.37E-01 |
| hsa-miR-142-5p  | 1.041221898 | 0.817006467 | 1.326969964 | 7.44E-01 |
| hsa-miR-146a-5p | 0.971911405 | 0.793286739 | 1.190757052 | 7.83E-01 |

|                 |             |             |             |          |
|-----------------|-------------|-------------|-------------|----------|
| hsa-miR-101-3p  | 0.949808226 | 0.652743482 | 1.382067675 | 7.88E-01 |
| hsa-miR-195-5p  | 0.962688643 | 0.721272764 | 1.284908385 | 7.96E-01 |
| hsa-miR-188-5p  | 1.033620825 | 0.794056696 | 1.345460616 | 8.06E-01 |
| hsa-miR-362-5p  | 1.028453015 | 0.821563428 | 1.287442417 | 8.07E-01 |
| hsa-miR-27b-3p  | 0.956407022 | 0.648867105 | 1.409709916 | 8.22E-01 |
| hsa-miR-342-5p  | 1.036263044 | 0.751217915 | 1.429466837 | 8.28E-01 |
| hsa-miR-22-3p   | 0.948123959 | 0.585442226 | 1.535487196 | 8.29E-01 |
| hsa-miR-26b-5p  | 0.958198792 | 0.633641099 | 1.448998378 | 8.40E-01 |
| hsa-miR-28-5p   | 1.063412772 | 0.572161323 | 1.976447337 | 8.46E-01 |
| hsa-miR-99b-5p  | 0.960747446 | 0.635198357 | 1.453145531 | 8.50E-01 |
| hsa-miR-551b-3p | 1.021979211 | 0.812324187 | 1.285744688 | 8.53E-01 |
| hsa-miR-223-3p  | 1.024409664 | 0.758320157 | 1.383868212 | 8.75E-01 |
| hsa-miR-125a-3p | 1.01963257  | 0.798229718 | 1.30244534  | 8.76E-01 |
| hsa-miR-200a-3p | 0.990900176 | 0.872611804 | 1.125223328 | 8.88E-01 |
| hsa-miR-452-5p  | 0.984876301 | 0.778383954 | 1.24614764  | 8.99E-01 |
| hsa-miR-362-3p  | 0.984398394 | 0.766671892 | 1.263956862 | 9.02E-01 |
| hsa-miR-345-5p  | 1.014315402 | 0.773980969 | 1.32927782  | 9.18E-01 |
| hsa-miR-196a-5p | 1.006284657 | 0.859150526 | 1.178616296 | 9.38E-01 |
| hsa-miR-31-5p   | 0.994162961 | 0.853197835 | 1.158418308 | 9.40E-01 |
| hsa-miR-200c-3p | 0.989627207 | 0.735980375 | 1.330690386 | 9.45E-01 |
| hsa-miR-130a-3p | 0.992250657 | 0.718030844 | 1.371196482 | 9.62E-01 |
| hsa-miR-30c-5p  | 0.992353813 | 0.700942214 | 1.404917652 | 9.65E-01 |
| hsa-miR-136-5p  | 1.003921218 | 0.804566098 | 1.252672483 | 9.72E-01 |
| hsa-miR-324-5p  | 0.996988716 | 0.708626824 | 1.402693868 | 9.86E-01 |
| hsa-miR-140-5p  | 0.997770932 | 0.648123489 | 1.536044981 | 9.92E-01 |
| hsa-miR-30d-5p  | 0.999375054 | 0.699780311 | 1.427234353 | 9.97E-01 |
| hsa-miR-10a-5p  | 1.000074704 | 0.773632939 | 1.292795799 | 1.00E+00 |

HR: hazard ratio; HR.95L, hazard ratio low; HR.95.H, hazard ratio high

**Table S2.** The predicted targeted genes of the eight miRNAs

| Database  | Mature miRNA ID | Target symbol | Target entrez | Target ensembl  | Pubmed ID | Support type |
|-----------|-----------------|---------------|---------------|-----------------|-----------|--------------|
| mirecords | hsa-miR-222-3p  | KIT           | 3815          | ENSG00000157404 | 16330772  | validated    |
| mirecords | hsa-miR-21-5p   | TPM1          | 7168          | ENSG00000140416 | 17363372  | validated    |
| mirecords | hsa-miR-181a-5p | HOXA11        | 3207          | ENSG00000005073 | 16489342  | validated    |
| mirecords | hsa-miR-21-5p   | NFIB          | 4781          | ENSG00000147862 | 18384814  | validated    |
| mirecords | hsa-miR-21-5p   | PDCD4         | 27250         | ENSG00000150593 | 18372920  | validated    |
| mirecords | hsa-miR-106b-5p | E2F1          | 1869          | ENSG00000101412 | 18328430  | validated    |
| mirecords | hsa-miR-106b-5p | CDKN1A        | 1026          | ENSG00000124762 | 18328430  | validated    |
| mirecords | hsa-miR-106b-5p | VEGFA         | 7422          | ENSG00000112715 | 18320040  | validated    |
| mirecords | hsa-miR-21-5p   | SERPINB5      | 5268          | ENSG00000206075 | 18270520  | validated    |
| mirecords | hsa-miR-212-3p  | TJP1          | 7082          | ENSG00000104067 | 18162065  | validated    |
| mirecords | hsa-miR-21-5p   | CDKN1A        | 1026          | ENSG00000124762 | 17991735  | validated    |
| mirecords | hsa-miR-21-5p   | FAS           | 355           | ENSG00000026103 | 17991735  | validated    |
| mirecords | hsa-miR-21-5p   | FAM3C         | 10447         | ENSG00000196937 | 17991735  | validated    |
| mirecords | hsa-miR-21-5p   | HIPK3         | 10114         | ENSG00000110422 | 17991735  | validated    |
| mirecords | hsa-miR-21-5p   | PRRG4         | 79056         | ENSG00000135378 | 17991735  | validated    |
| mirecords | hsa-miR-21-5p   | ACTA2         | 59            | ENSG00000107796 | 17991735  | validated    |
| mirecords | hsa-miR-21-5p   | BTG2          | 7832          | ENSG00000159388 | 17991735  | validated    |
| mirecords | hsa-miR-21-5p   | BMPR2         | 659           | ENSG00000204217 | 17991735  | validated    |
| mirecords | hsa-miR-21-5p   | SESN1         | 27244         | ENSG00000080546 | 17991735  | validated    |
| mirecords | hsa-miR-21-5p   | IL6R          | 3570          | ENSG00000160712 | 17991735  | validated    |
| mirecords | hsa-miR-21-5p   | SOCS5         | 9655          | ENSG00000171150 | 17991735  | validated    |
| mirecords | hsa-miR-21-5p   | GLCCI1        | 113263        | ENSG00000106415 | 17991735  | validated    |
| mirecords | hsa-miR-21-5p   | APAF1         | 317           | ENSG00000120868 | 17991735  | validated    |
| mirecords | hsa-miR-21-5p   | SLC16A10      | 117247        | ENSG00000112394 | 17991735  | validated    |
| mirecords | hsa-miR-21-5p   | SGK3          | 23678         | ENSG00000104205 | 17991735  | validated    |
| mirecords | hsa-miR-21-5p   | RP2           | 6102          | ENSG00000102218 | 17991735  | validated    |
| mirecords | hsa-miR-21-5p   | CDK6          | 1021          | ENSG00000105810 | 17991735  | validated    |
| mirecords | hsa-miR-21-5p   | CFL2          | 1073          | ENSG00000165410 | 17991735  | validated    |
| mirecords | hsa-miR-222-3p  | CDKN1B        | 1027          | ENSG00000111276 | 17721077  | validated    |
| mirecords | hsa-miR-222-3p  | CDKN1C        | 1028          | ENSG00000129757 | 18413744  | validated    |
| mirecords | hsa-miR-15b-5p  | BCL2          | 596           | ENSG00000171791 | 18449891  | validated    |
| mirecords | hsa-miR-21-5p   | RECK          | 8434          | ENSG00000122707 | 18794849  | validated    |
| mirecords | hsa-miR-222-3p  | ESR1          | 2099          | ENSG00000091831 | 18790736  | validated    |
| mirecords | hsa-miR-326     | SMO           | 6608          | ENSG00000128602 | 18756266  | validated    |
| mirecords | hsa-miR-181a-5p | TAF6L         | 10629         | ENSG00000162227 | 18728182  | validated    |
| mirecords | hsa-miR-106b-5p | TAF6L         | 10629         | ENSG00000162227 | 18728182  | validated    |
| mirecords | hsa-miR-21-5p   | TIMP3         | 7078          | ENSG00000100234 | 18591254  | validated    |
| mirecords | hsa-miR-15b-5p  | CCNE1         | 898           | ENSG00000105173 | 19135980  | validated    |
| mirecords | hsa-miR-106b-5p | ITCH          | 83737         | ENSG00000078747 | 19096009  | validated    |
| mirecords | hsa-miR-192-5p  | DHFR          | 1719          | ENSG00000228716 | 19088023  | validated    |
| mirecords | hsa-miR-21-5p   | MTAP          | 4507          | ENSG00000099810 | 19013014  | validated    |
| mirecords | hsa-miR-21-5p   | SOX5          | 6660          | ENSG00000134532 | 19013014  | validated    |
| mirecords | hsa-miR-296-5p  | HGS           | 9146          | ENSG00000185359 | 18977327  | validated    |
| mirecords | hsa-miR-21-5p   | JMY           | 133746        | ENSG00000152409 | 18829576  | validated    |
| mirecords | hsa-miR-21-5p   | TGFBR2        | 7048          | ENSG00000163513 | 18829576  | validated    |
| mirecords | hsa-miR-21-5p   | TGFBR3        | 7049          | ENSG00000069702 | 11829576  | validated    |
| mirecords | hsa-miR-21-5p   | HNRNPK        | 3190          | ENSG00000165119 | 11829576  | validated    |
| mirecords | hsa-miR-21-5p   | TP63          | 8626          | ENSG00000073282 | 11829576  | validated    |
| mirecords | hsa-miR-21-5p   | TOPORS        | 10210         | ENSG00000197579 | 11829576  | validated    |
| mirecords | hsa-miR-21-5p   | DAXX          | 1616          | ENSG00000206279 | 18829576  | validated    |
| mirecords | hsa-miR-21-5p   | TP53BP2       | 7159          | ENSG00000143514 | 18829576  | validated    |
| mirecords | hsa-miR-21-5p   | PPIF          | 10105         | ENSG00000108179 | 11829576  | validated    |
| mirecords | hsa-miR-21-5p   | PTEN          | 5728          | ENSG00000171862 | 18850008  | validated    |
| mirecords | hsa-miR-106b-5p | RB1           | 5925          | ENSG00000139687 | 19175831  | validated    |
| mirecords | hsa-miR-21-5p   | TGFB1         | 7040          | ENSG00000105329 | 19264808  | validated    |
| mirecords | hsa-miR-21-5p   | RASA1         | 5921          | ENSG00000145715 | 19264808  | validated    |
| mirecords | hsa-miR-21-5p   | RASGRP1       | 10125         | ENSG00000172575 | 19264808  | validated    |
| mirecords | hsa-miR-181a-5p | CDKN1B        | 1027          | ENSG00000111276 | 19273599  | validated    |
| mirecords | hsa-miR-296-5p  | CCND1         | 595           | ENSG00000110092 | 20485139  | validated    |
| mirecords | hsa-miR-296-5p  | CDKN1B        | 1027          | ENSG00000111276 | 20485139  | validated    |
| mirecords | hsa-miR-296-5p  | ABCB1         | 5243          | ENSG00000085563 | 20485139  | validated    |
| mirecords | hsa-miR-296-5p  | BCL2          | 596           | ENSG00000171791 | 20485139  | validated    |
| mirecords | hsa-miR-296-5p  | BAX           | 581           | ENSG00000087088 | 20485139  | validated    |
| mirecords | hsa-miR-18a-5p  | CTGF          | 1490          | ENSG00000118523 | 20305691  | validated    |
| mirecords | hsa-miR-18a-5p  | THBS1         | 7057          | ENSG00000137801 | 20299512  | validated    |
| mirecords | hsa-miR-18a-5p  | BIM           |               |                 | 20299512  | validated    |
| mirecords | hsa-miR-18a-5p  | ESR1          | 2099          | ENSG00000091831 | 20080637  | validated    |
| mirecords | hsa-miR-222-3p  | FOS           | 2353          | ENSG00000170345 | 20299489  | validated    |
| mirecords | hsa-miR-181a-5p | BCL2          | 596           | ENSG00000171791 | 20204284  | validated    |

|            |                 |         |       |                 |          |           |
|------------|-----------------|---------|-------|-----------------|----------|-----------|
| mirecords  | hsa-miR-21-5p   | E2F1    | 1869  | ENSG00000101412 | 19906824 | validated |
| mirecords  | hsa-miR-15b-5p  | RECK    | 8434  | ENSG00000122707 | 20154725 | validated |
| mirecords  | hsa-miR-222-3p  | PPP2R2A | 5520  | ENSG00000221914 | 20103675 | validated |
| mirecords  | hsa-miR-15b-5p  | MKK4    |       |                 | 19861690 | validated |
| mirecords  | hsa-miR-21-5p   | CDC25A  | 993   | ENSG00000164045 | 19826040 | validated |
| mirecords  | hsa-miR-181a-5p | PLAG1   | 5324  | ENSG00000181690 | 19692702 | validated |
| mirecords  | hsa-miR-181a-5p | ESR1    | 2099  | ENSG00000091831 | 19684618 | validated |
| mirecords  | hsa-miR-181a-5p | CDX2    | 1045  | ENSG00000165556 | 19585654 | validated |
| mirecords  | hsa-miR-181a-5p | GATA6   | 2627  | ENSG00000141448 | 19585654 | validated |
| mirecords  | hsa-miR-181a-5p | NLK     | 51701 | ENSG00000087095 | 19585654 | validated |
| mirecords  | hsa-miR-21-5p   | LRRFIP1 | 9208  | ENSG00000124831 | 19559015 | validated |
| mirecords  | hsa-miR-222-3p  | MMP1    | 4312  | ENSG00000196611 | 19487542 | validated |
| mirecords  | hsa-miR-222-3p  | SOD2    | 6648  | ENSG00000112096 | 19487542 | validated |
| mirecords  | hsa-miR-222-3p  | BIM     |       |                 | 19438724 | validated |
| mirecords  | hsa-miR-21-5p   | JAG1    | 182   | ENSG00000101384 | 19398721 | validated |
| mirecords  | hsa-miR-21-5p   | MARCKS  | 4082  | ENSG00000277443 | 19302977 | validated |
| mirecords  | hsa-miR-21-5p   | PELI1   | 57162 | ENSG00000197329 | 20167875 | validated |
| mirecords  | hsa-miR-192-5p  | WNK1    | 65125 | ENSG00000060237 | 20813867 | validated |
| mirecords  | hsa-miR-222-3p  | BBC3    | 27113 | ENSG00000105327 | 20813046 | validated |
| mirecords  | hsa-miR-18a-5p  | HSF2    | 3298  | ENSG00000025156 | 20724452 | validated |
| mirecords  | hsa-miR-222-3p  | STAT5A  | 6776  | ENSG00000126561 | 20489169 | validated |
| mirecords  | hsa-miR-222-3p  | PTEN    | 5728  | ENSG00000171862 | 20618998 | validated |
| mirecords  | hsa-miR-21-5p   | PPARA   | 5465  | ENSG00000186951 | 20693317 | validated |
| mirecords  | hsa-miR-192-5p  | RB1     | 5925  | ENSG00000139687 | 21511813 | validated |
| mirecords  | hsa-miR-222-3p  | p27     |       |                 | 21226887 | validated |
| mirecords  | hsa-miR-21-5p   | STAT3   | 6774  | ENSG00000168610 | 21381024 | validated |
| mirecords  | hsa-miR-296-5p  | PUMA    |       |                 | 21633093 | validated |
| mirecords  | hsa-miR-15b-5p  | BMI1    | 648   | ENSG00000168283 | 21725369 | validated |
| mirecords  | hsa-miR-296-5p  | IKBKE   | 9641  | ENSG00000263528 | 22114321 | validated |
| mirecords  | hsa-miR-222-3p  | TIMP3   | 7078  | ENSG00000100234 | 22009755 | validated |
| mirecords  | hsa-miR-21-5p   | NT-3    |       |                 | 22019057 | validated |
| mirtarbase | hsa-miR-106b-5p | ABCA1   | 19    | ENSG00000165029 | 22473208 | validated |
| mirtarbase | hsa-miR-15b-5p  | ABL2    | 27    | ENSG00000143322 | 23592263 | validated |
| mirtarbase | hsa-miR-18a-5p  | ABR     | 29    | ENSG00000278741 | 23622248 | validated |
| mirtarbase | hsa-miR-222-3p  | ACACA   | 31    | ENSG00000275176 | 23622248 | validated |
| mirtarbase | hsa-miR-192-5p  | ACADSB  | 36    | ENSG00000196177 | 19074876 | validated |
| mirtarbase | hsa-miR-106b-5p | ACADSB  | 36    | ENSG00000196177 | 22473208 | validated |
| mirtarbase | hsa-miR-21-5p   | ACAT1   | 38    | ENSG00000075239 | 18591254 | validated |
| mirtarbase | hsa-miR-212-3p  | ACHE    | 43    | ENSG00000087085 | 23974008 | validated |
| mirtarbase | hsa-miR-106b-5p | ACOX1   | 51    | ENSG00000161533 | 19536157 | validated |
| mirtarbase | hsa-miR-15b-5p  | ACOX1   | 51    | ENSG00000161533 | 22473208 | validated |
| mirtarbase | hsa-miR-326     | ACTB    | 60    | ENSG00000075624 | 23622248 | validated |
| mirtarbase | hsa-miR-222-3p  | ACTB    | 60    | ENSG00000075624 | 23622248 | validated |
| mirtarbase | hsa-miR-326     | ACTG1   | 71    | ENSG00000184009 | 23622248 | validated |
| mirtarbase | hsa-miR-222-3p  | ACTG1   | 71    | ENSG00000184009 | 23622248 | validated |
| mirtarbase | hsa-miR-18a-5p  | ACTL6A  | 86    | ENSG00000136518 | 20371350 | validated |
| mirtarbase | hsa-miR-301a-3p | ACVR1   | 90    | ENSG00000115170 | 21572407 | validated |
| mirtarbase | hsa-miR-106b-5p | ACVR1B  | 91    | ENSG00000135503 | 23446348 | validated |
| mirtarbase | hsa-miR-192-5p  | ACVR2A  | 92    | ENSG00000121989 | 19074876 | validated |
| mirtarbase | hsa-miR-15b-5p  | ACVR2A  | 92    | ENSG00000121989 | 20371350 | validated |
| mirtarbase | hsa-miR-192-5p  | ACVR2B  | 93    | ENSG00000114739 | 22431721 | validated |
| mirtarbase | hsa-miR-296-5p  | ACVRL1  | 94    | ENSG00000139567 | 19536157 | validated |
| mirtarbase | hsa-miR-181a-5p | ACYP1   | 97    | ENSG00000119640 | 22473208 | validated |
| mirtarbase | hsa-miR-106b-5p | ADAR    | 103   | ENSG00000160710 | 23592263 | validated |
| mirtarbase | hsa-miR-301a-3p | ADARB2  | 105   | ENSG00000185736 | 22012620 | validated |
| mirtarbase | hsa-miR-212-3p  | ADCY1   | 107   | ENSG00000164742 | 25766675 | validated |
| mirtarbase | hsa-miR-181a-5p | ADCY9   | 115   | ENSG00000162104 | 26701625 | validated |
| mirtarbase | hsa-miR-106b-5p | ADD1    | 118   | ENSG00000087274 | 22473208 | validated |
| mirtarbase | hsa-miR-106b-5p | ADH5    | 128   | ENSG00000197894 | 23622248 | validated |
| mirtarbase | hsa-miR-15b-5p  | ADORA3  | 140   | ENSG00000282608 | 19536157 | validated |
| mirtarbase | hsa-miR-21-5p   | PARP1   | 142   | ENSG00000143799 | 18591254 | validated |
| mirtarbase | hsa-miR-301a-3p | PARP1   | 142   | ENSG00000143799 | 23446348 | validated |
| mirtarbase | hsa-miR-15b-5p  | ADRA2B  | 151   | ENSG00000274286 | 23824327 | validated |
| mirtarbase | hsa-miR-181a-5p | GRK2    | 156   | ENSG00000173020 | 22473208 | validated |
| mirtarbase | hsa-miR-192-5p  | GRK3    | 157   | ENSG00000100077 | 19074876 | validated |
| mirtarbase | hsa-miR-106b-5p | GRK3    | 157   | ENSG00000100077 | 23824327 | validated |
| mirtarbase | hsa-miR-505-3p  | GRK3    | 157   | ENSG00000100077 | 23824327 | validated |
| mirtarbase | hsa-miR-222-3p  | AP1B1   | 162   | ENSG00000100280 | 23622248 | validated |
| mirtarbase | hsa-miR-106b-5p | AP2B1   | 163   | ENSG00000006125 | 23622248 | validated |
| mirtarbase | hsa-miR-15b-5p  | AP2B1   | 163   | ENSG00000006125 | 26701625 | validated |
| mirtarbase | hsa-miR-106b-5p | AP1G1   | 164   | ENSG00000166747 | 23622248 | validated |

|            |                 |         |     |                 |          |           |
|------------|-----------------|---------|-----|-----------------|----------|-----------|
| mirtarbase | hsa-miR-582-5p  | AP1G1   | 164 | ENSG00000166747 | 23592263 | validated |
| mirtarbase | hsa-miR-144-3p  | AP1G1   | 164 | ENSG00000166747 | 23592263 | validated |
| mirtarbase | hsa-miR-106b-5p | AFP     | 174 | ENSG00000081051 | 17242205 | validated |
| mirtarbase | hsa-miR-181a-5p | ACAN    | 176 | ENSG00000157766 | 22942087 | validated |
| mirtarbase | hsa-miR-192-5p  | AGL     | 178 | ENSG00000162688 | 19074876 | validated |
| mirtarbase | hsa-miR-181a-5p | AHR     | 196 | ENSG00000106546 | 24329418 | validated |
| mirtarbase | hsa-miR-21-5p   | CRYBG1  | 202 | ENSG00000112297 | 18591254 | validated |
| mirtarbase | hsa-miR-326     | AKT1    | 207 | ENSG00000142208 | 21572407 | validated |
| mirtarbase | hsa-miR-192-5p  | AKT1    | 207 | ENSG00000142208 | 26351877 | validated |
| mirtarbase | hsa-miR-21-5p   | AKT2    | 208 | ENSG00000105221 | 20048743 | validated |
| mirtarbase | hsa-miR-192-5p  | ALCAM   | 214 | ENSG00000170017 | 16822819 | validated |
| mirtarbase | hsa-miR-181a-5p | ALDH1A1 | 216 | ENSG00000165092 | 26693182 | validated |
| mirtarbase | hsa-miR-15b-5p  | ALDH3B1 | 221 | ENSG00000006534 | 23592263 | validated |
| mirtarbase | hsa-miR-192-5p  | ALDH9A1 | 223 | ENSG00000143149 | 19074876 | validated |
| mirtarbase | hsa-miR-106b-5p | ALDH9A1 | 223 | ENSG00000143149 | 22473208 | validated |
| mirtarbase | hsa-miR-582-3p  | ALDH9A1 | 223 | ENSG00000143149 | 23592263 | validated |
| mirtarbase | hsa-miR-181a-5p | ALDH9A1 | 223 | ENSG00000143149 | 22473208 | validated |
| mirtarbase | hsa-miR-301a-3p | ABCD2   | 225 | ENSG00000173208 | 20371350 | validated |
| mirtarbase | hsa-miR-212-3p  | AMD1    | 262 | ENSG00000123505 | 23446348 | validated |
| mirtarbase | hsa-miR-582-5p  | AMD1    | 262 | ENSG00000123505 | 23313552 | validated |
| mirtarbase | hsa-miR-582-3p  | AMD1    | 262 | ENSG00000123505 | 27292025 | validated |
| mirtarbase | hsa-miR-505-3p  | AMFR    | 267 | ENSG00000159461 | 26032086 | validated |
| mirtarbase | hsa-miR-192-5p  | ANG     | 283 | ENSG00000214274 | 19074876 | validated |
| mirtarbase | hsa-miR-106b-5p | SLC25A5 | 292 | ENSG00000005022 | 23622248 | validated |
| mirtarbase | hsa-miR-326     | ANXA6   | 309 | ENSG00000197043 | 28735896 | validated |
| mirtarbase | hsa-miR-212-3p  | APBA1   | 320 | ENSG00000107282 | 19536157 | validated |
| mirtarbase | hsa-miR-106b-5p | APC     | 324 | ENSG00000134982 | 23087084 | validated |
| mirtarbase | hsa-miR-192-5p  | APC     | 324 | ENSG00000134982 | 19074876 | validated |
| mirtarbase | hsa-miR-21-5p   | APC     | 324 | ENSG00000134982 | 18591254 | validated |
| mirtarbase | hsa-miR-181a-5p | XIAP    | 331 | ENSG00000101966 | 22610076 | validated |
| mirtarbase | hsa-miR-192-5p  | XIAP    | 331 | ENSG00000101966 | 19074876 | validated |
| mirtarbase | hsa-miR-106b-5p | XIAP    | 331 | ENSG00000101966 | 21572407 | validated |
| mirtarbase | hsa-miR-505-3p  | XIAP    | 331 | ENSG00000101966 | 22012620 | validated |
| mirtarbase | hsa-miR-301a-3p | XIAP    | 331 | ENSG00000101966 | 23824327 | validated |
| mirtarbase | hsa-miR-106b-5p | APLP2   | 334 | ENSG00000084234 | 23622248 | validated |
| mirtarbase | hsa-miR-106b-5p | APOH    | 350 | ENSG00000091583 | 23824327 | validated |
| mirtarbase | hsa-miR-106b-5p | APP     | 351 | ENSG00000142192 | 19110058 | validated |
| mirtarbase | hsa-miR-222-3p  | APP     | 351 | ENSG00000142192 | 23622248 | validated |
| mirtarbase | hsa-miR-15b-5p  | APP     | 351 | ENSG00000142192 | 21572407 | validated |
| mirtarbase | hsa-miR-144-3p  | APP     | 351 | ENSG00000142192 | 21572407 | validated |
| mirtarbase | hsa-miR-15b-5p  | APRT    | 353 | ENSG00000198931 | 23622248 | validated |
| mirtarbase | hsa-miR-18a-5p  | FAS     | 355 | ENSG00000026103 | 24955218 | validated |
| mirtarbase | hsa-miR-106b-5p | FAS     | 355 | ENSG00000026103 | 24955218 | validated |
| mirtarbase | hsa-miR-21-5p   | FASLG   | 356 | ENSG00000117560 | 21820586 | validated |
| mirtarbase | hsa-miR-326     | AR      | 367 | ENSG00000169083 | 22012620 | validated |
| mirtarbase | hsa-miR-326     | ABCC6   | 368 | ENSG00000091262 | 23592263 | validated |
| mirtarbase | hsa-miR-15b-5p  | ABCC6   | 368 | ENSG00000091262 | 23592263 | validated |
| mirtarbase | hsa-miR-15b-5p  | ARCN1   | 372 | ENSG00000095139 | 22473208 | validated |
| mirtarbase | hsa-miR-106b-5p | ARCN1   | 372 | ENSG00000095139 | 22473208 | validated |
| mirtarbase | hsa-miR-192-5p  | TRIM23  | 373 | ENSG00000113595 | 19074876 | validated |
| mirtarbase | hsa-miR-582-3p  | ARF3    | 377 | ENSG00000134287 | 23592263 | validated |
| mirtarbase | hsa-miR-181a-5p | ARF6    | 382 | ENSG00000165527 | 17612493 | validated |
| mirtarbase | hsa-miR-18a-5p  | ARF6    | 382 | ENSG00000165527 | 20371350 | validated |
| mirtarbase | hsa-miR-21-5p   | RHOB    | 388 | ENSG00000143878 | 20460403 | validated |
| mirtarbase | hsa-miR-106b-5p | RHOC    | 389 | ENSG00000155366 | 21572407 | validated |
| mirtarbase | hsa-miR-181a-5p | RHOG    | 391 | ENSG00000177105 | 22473208 | validated |
| mirtarbase | hsa-miR-106b-5p | ARHGAP1 | 392 | ENSG00000175220 | 22473208 | validated |
| mirtarbase | hsa-miR-301a-3p | ARHGAP1 | 392 | ENSG00000175220 | 23592263 | validated |
| mirtarbase | hsa-miR-15b-5p  | ARHGDI  | 396 | ENSG00000141522 | 22473208 | validated |
| mirtarbase | hsa-miR-505-3p  | RHOH    | 399 | ENSG00000168421 | 19536157 | validated |
| mirtarbase | hsa-miR-106b-5p | ARL1    | 400 | ENSG00000120805 | 22473208 | validated |
| mirtarbase | hsa-miR-181a-5p | PHOX2A  | 401 | ENSG00000165462 | 17612493 | validated |
| mirtarbase | hsa-miR-181a-5p | ARRB2   | 409 | ENSG00000141480 | 22473208 | validated |
| mirtarbase | hsa-miR-301a-3p | ARSA    | 410 | ENSG00000100299 | 27292025 | validated |
| mirtarbase | hsa-miR-212-3p  | ART4    | 420 | ENSG00000111339 | 22012620 | validated |
| mirtarbase | hsa-miR-18a-5p  | ARVCF   | 421 | ENSG00000099889 | 23622248 | validated |
| mirtarbase | hsa-miR-15b-5p  | ASGR2   | 433 | ENSG00000161944 | 23446348 | validated |
| mirtarbase | hsa-miR-192-5p  | ASPH    | 444 | ENSG00000198363 | 19074876 | validated |
| mirtarbase | hsa-miR-192-5p  | ATF1    | 466 | ENSG00000123268 | 19074876 | validated |
| mirtarbase | hsa-miR-181a-5p | ATM     | 472 | ENSG00000149311 | 21274007 | validated |
| mirtarbase | hsa-miR-18a-5p  | ATM     | 472 | ENSG00000149311 | 21980462 | validated |



|            |                 |          |     |                 |          |           |
|------------|-----------------|----------|-----|-----------------|----------|-----------|
| mirtarbase | hsa-miR-301a-3p | RERE     | 473 | ENSG00000142599 | 23622248 | validated |
| mirtarbase | hsa-miR-18a-5p  | ATP1A1   | 476 | ENSG00000163399 | 23622248 | validated |
| mirtarbase | hsa-miR-192-5p  | ATP1B1   | 481 | ENSG00000143153 | 23221637 | validated |
| mirtarbase | hsa-miR-106b-5p | ATP1B3   | 483 | ENSG00000069849 | 23313552 | validated |
| mirtarbase | hsa-miR-15b-5p  | ATP2A2   | 488 | ENSG00000174437 | 23622248 | validated |
| mirtarbase | hsa-miR-106b-5p | ATP2B1   | 490 | ENSG00000070961 | 22473208 | validated |
| mirtarbase | hsa-miR-181a-5p | ATP2B1   | 490 | ENSG00000070961 | 22473208 | validated |
| mirtarbase | hsa-miR-21-5p   | ATP2B4   | 493 | ENSG00000058668 | 18591254 | validated |
| mirtarbase | hsa-miR-15b-5p  | ATP5MC3  | 518 | ENSG00000154518 | 21572407 | validated |
| mirtarbase | hsa-miR-301a-3p | ATP6V1B2 | 526 | ENSG00000147416 | 23592263 | validated |
| mirtarbase | hsa-miR-301a-3p | ATP6V1C1 | 528 | ENSG00000155097 | 22012620 | validated |
| mirtarbase | hsa-miR-222-3p  | ATP7B    | 540 | ENSG00000123191 | 23622248 | validated |
| mirtarbase | hsa-miR-21-5p   | ATRX     | 546 | ENSG00000085224 | 18591254 | validated |
| mirtarbase | hsa-miR-106b-5p | B2M      | 567 | ENSG00000166710 | 23592263 | validated |
| mirtarbase | hsa-miR-181a-5p | NKX3-2   | 579 | ENSG00000109705 | 17612493 | validated |
| mirtarbase | hsa-miR-582-5p  | NKX3-2   | 579 | ENSG00000109705 | 23824327 | validated |
| mirtarbase | hsa-miR-192-5p  | BARD1    | 580 | ENSG00000138376 | 16822819 | validated |
| mirtarbase | hsa-miR-181a-5p | BAX      | 581 | ENSG00000087088 | 26028030 | validated |
| mirtarbase | hsa-miR-15b-5p  | BAX      | 581 | ENSG00000087088 | 27499071 | validated |
| mirtarbase | hsa-miR-21-5p   | BCAT1    | 586 | ENSG00000060982 | 18591254 | validated |
| mirtarbase | hsa-miR-15b-5p  | CCND1    | 595 | ENSG00000110092 | 19135980 | validated |
| mirtarbase | hsa-miR-106b-5p | CCND1    | 595 | ENSG00000110092 | 21283765 | validated |
| mirtarbase | hsa-miR-326     | CCND1    | 595 | ENSG00000110092 | 23592263 | validated |
| mirtarbase | hsa-miR-18a-5p  | CCND1    | 595 | ENSG00000110092 | 21572407 | validated |
| mirtarbase | hsa-miR-21-5p   | BCL2     | 596 | ENSG00000171791 | 17072344 | validated |
| mirtarbase | hsa-miR-192-5p  | BCL2     | 596 | ENSG00000171791 | 19074876 | validated |
| mirtarbase | hsa-miR-18a-5p  | BCL2     | 596 | ENSG00000171791 | 24280866 | validated |
| mirtarbase | hsa-miR-326     | BCL2L1   | 598 | ENSG00000171552 | 25875481 | validated |
| mirtarbase | hsa-miR-106b-5p | BCL2L2   | 599 | ENSG00000129473 | 23446348 | validated |
| mirtarbase | hsa-miR-21-5p   | BCL6     | 604 | ENSG00000113916 | 23416424 | validated |
| mirtarbase | hsa-miR-21-5p   | BCL7A    | 605 | ENSG00000110987 | 22473208 | validated |
| mirtarbase | hsa-miR-15b-5p  | BCL7A    | 605 | ENSG00000110987 | 22473208 | validated |
| mirtarbase | hsa-miR-18a-5p  | BDH1     | 622 | ENSG00000275544 | 23824327 | validated |
| mirtarbase | hsa-miR-192-5p  | BGLAP    | 632 | ENSG00000242252 | 19074876 | validated |
| mirtarbase | hsa-miR-192-5p  | BICD1    | 636 | ENSG00000151746 | 19074876 | validated |
| mirtarbase | hsa-miR-222-3p  | PRDM1    | 639 | ENSG00000057657 | 26655851 | validated |
| mirtarbase | hsa-miR-192-5p  | BLM      | 641 | ENSG00000197299 | 19074876 | validated |
| mirtarbase | hsa-miR-192-5p  | BMI1     | 648 | ENSG00000168283 | 26717043 | validated |
| mirtarbase | hsa-miR-21-5p   | BMI1     | 648 | ENSG00000168283 | 27644439 | validated |
| mirtarbase | hsa-miR-106b-5p | BMP2     | 650 | ENSG00000125845 | 23592263 | validated |
| mirtarbase | hsa-miR-505-3p  | BMP2     | 650 | ENSG00000125845 | 23592263 | validated |
| mirtarbase | hsa-miR-181a-5p | BMP3     | 651 | ENSG00000152785 | 22942087 | validated |
| mirtarbase | hsa-miR-301a-3p | BMP3     | 651 | ENSG00000152785 | 21572407 | validated |
| mirtarbase | hsa-miR-326     | BMP7     | 655 | ENSG00000101144 | 23824327 | validated |
| mirtarbase | hsa-miR-106b-5p | BMP8B    | 656 | ENSG00000116985 | 23446348 | validated |
| mirtarbase | hsa-miR-192-5p  | BMPR2    | 659 | ENSG00000204217 | 19074876 | validated |
| mirtarbase | hsa-miR-181a-5p | BMPR2    | 659 | ENSG00000204217 | 22942087 | validated |
| mirtarbase | hsa-miR-106b-5p | BMPR2    | 659 | ENSG00000204217 | 22473208 | validated |
| mirtarbase | hsa-miR-21-5p   | BNIP2    | 663 | ENSG00000140299 | 22473208 | validated |
| mirtarbase | hsa-miR-106b-5p | BNIP2    | 663 | ENSG00000140299 | 22473208 | validated |
| mirtarbase | hsa-miR-192-5p  | DST      | 667 | ENSG00000151914 | 19074876 | validated |
| mirtarbase | hsa-miR-181a-5p | BPGM     | 669 | ENSG00000172331 | 17612493 | validated |
| mirtarbase | hsa-miR-212-3p  | BRCA1    | 672 | ENSG00000012048 | 17875710 | validated |
| mirtarbase | hsa-miR-192-5p  | BRCA1    | 672 | ENSG00000012048 | 19074876 | validated |
| mirtarbase | hsa-miR-21-5p   | BRCA1    | 672 | ENSG00000012048 | 18591254 | validated |
| mirtarbase | hsa-miR-181a-5p | BRCA1    | 672 | ENSG00000012048 | 23622248 | validated |
| mirtarbase | hsa-miR-192-5p  | BRCA2    | 675 | ENSG00000139618 | 19074876 | validated |
| mirtarbase | hsa-miR-181a-5p | ZFP36L1  | 677 | ENSG00000185650 | 22473208 | validated |
| mirtarbase | hsa-miR-181a-5p | ZFP36L2  | 678 | ENSG00000152518 | 23622248 | validated |
| mirtarbase | hsa-miR-18a-5p  | ZFP36L2  | 678 | ENSG00000152518 | 23622248 | validated |
| mirtarbase | hsa-miR-582-5p  | ZFP36L2  | 678 | ENSG00000152518 | 21572407 | validated |
| mirtarbase | hsa-miR-144-3p  | ZFP36L2  | 678 | ENSG00000152518 | 21572407 | validated |
| mirtarbase | hsa-miR-15b-5p  | BSG      | 682 | ENSG00000172270 | 22473208 | validated |
| mirtarbase | hsa-miR-192-5p  | BTC      | 685 | ENSG00000174808 | 19074876 | validated |
| mirtarbase | hsa-miR-21-5p   | KLF9     | 687 | ENSG00000119138 | 20371350 | validated |
| mirtarbase | hsa-miR-21-5p   | KLF5     | 688 | ENSG00000102554 | 18591254 | validated |
| mirtarbase | hsa-miR-301a-3p | BTG1     | 694 | ENSG00000133639 | 23313552 | validated |
| mirtarbase | hsa-miR-192-5p  | BUB1B    | 701 | ENSG00000156970 | 19074876 | validated |
| mirtarbase | hsa-miR-192-5p  | BYSL     | 705 | ENSG00000112578 | 20371350 | validated |
| mirtarbase | hsa-miR-301a-3p | C1QBP    | 708 | ENSG00000108561 | 23622248 | validated |
| mirtarbase | hsa-miR-326     | C1R      | 715 | ENSG00000159403 | 23824327 | validated |

|            |                 |          |     |                 |          |           |
|------------|-----------------|----------|-----|-----------------|----------|-----------|
| mirtarbase | hsa-miR-181a-5p | C8A      | 731 | ENSG00000157131 | 17612493 | validated |
| mirtarbase | hsa-miR-296-5p  | VPS51    | 738 | ENSG00000149823 | 23708386 | validated |
| mirtarbase | hsa-miR-192-5p  | CA8      | 767 | ENSG00000178538 | 19074876 | validated |
| mirtarbase | hsa-miR-15b-5p  | CA8      | 767 | ENSG00000178538 | 21572407 | validated |
| mirtarbase | hsa-miR-18a-5p  | CA12     | 771 | ENSG00000074410 | 20371350 | validated |
| mirtarbase | hsa-miR-301a-3p | CAD      | 790 | ENSG00000084774 | 23622248 | validated |
| mirtarbase | hsa-miR-18a-5p  | CAD      | 790 | ENSG00000084774 | 23592263 | validated |
| mirtarbase | hsa-miR-21-5p   | CALD1    | 800 | ENSG00000122786 | 18591254 | validated |
| mirtarbase | hsa-miR-301a-3p | CALM2    | 805 | ENSG00000143933 | 23446348 | validated |
| mirtarbase | hsa-miR-15b-5p  | CALU     | 813 | ENSG00000128595 | 22473208 | validated |
| mirtarbase | hsa-miR-192-5p  | CAMK4    | 814 | ENSG00000152495 | 19074876 | validated |
| mirtarbase | hsa-miR-222-3p  | CANX     | 821 | ENSG00000127022 | 23622248 | validated |
| mirtarbase | hsa-miR-18a-5p  | CANX     | 821 | ENSG00000127022 | 23622248 | validated |
| mirtarbase | hsa-miR-15b-5p  | CANX     | 821 | ENSG00000127022 | 21572407 | validated |
| mirtarbase | hsa-miR-505-3p  | CANX     | 821 | ENSG00000127022 | 23592263 | validated |
| mirtarbase | hsa-miR-15b-5p  | CAPZA2   | 830 | ENSG00000198898 | 20371350 | validated |
| mirtarbase | hsa-miR-106b-5p | CAPZA2   | 830 | ENSG00000198898 | 23313552 | validated |
| mirtarbase | hsa-miR-222-3p  | CAST     | 831 | ENSG00000153113 | 23622248 | validated |
| mirtarbase | hsa-miR-582-5p  | CAPZB    | 832 | ENSG00000077549 | 27292025 | validated |
| mirtarbase | hsa-miR-106b-5p | CASP2    | 835 | ENSG00000106144 | 22473208 | validated |
| mirtarbase | hsa-miR-582-5p  | CASP3    | 836 | ENSG00000164305 | 24805821 | validated |
| mirtarbase | hsa-miR-106b-5p | CASP7    | 840 | ENSG00000165806 | 17242205 | validated |
| mirtarbase | hsa-miR-192-5p  | CASP7    | 840 | ENSG00000165806 | 19074876 | validated |
| mirtarbase | hsa-miR-106b-5p | CASP8    | 841 | ENSG00000064012 | 24166509 | validated |
| mirtarbase | hsa-miR-296-5p  | CASP8    | 841 | ENSG00000064012 | 27927008 | validated |
| mirtarbase | hsa-miR-21-5p   | CASP8    | 841 | ENSG00000064012 | 26080425 | validated |
| mirtarbase | hsa-miR-582-5p  | CASP9    | 842 | ENSG00000132906 | 24805821 | validated |
| mirtarbase | hsa-miR-192-5p  | CAV1     | 857 | ENSG00000105974 | 24623846 | validated |
| mirtarbase | hsa-miR-106b-5p | CAV1     | 857 | ENSG00000105974 | 20371350 | validated |
| mirtarbase | hsa-miR-222-3p  | RUNX2    | 860 | ENSG00000124813 | 26809090 | validated |
| mirtarbase | hsa-miR-18a-5p  | RUNX1    | 861 | ENSG00000159216 | 25452107 | validated |
| mirtarbase | hsa-miR-181a-5p | RUNX1    | 861 | ENSG00000159216 | 26580398 | validated |
| mirtarbase | hsa-miR-106b-5p | RUNX1T1  | 862 | ENSG00000079102 | 17242205 | validated |
| mirtarbase | hsa-miR-15b-5p  | RUNX1T1  | 862 | ENSG00000079102 | 21572407 | validated |
| mirtarbase | hsa-miR-15b-5p  | CBFA2T3  | 863 | ENSG00000129993 | 22473208 | validated |
| mirtarbase | hsa-miR-301a-3p | RUNX3    | 864 | ENSG00000020633 | 23338485 | validated |
| mirtarbase | hsa-miR-106b-5p | RUNX3    | 864 | ENSG00000020633 | 20371350 | validated |
| mirtarbase | hsa-miR-222-3p  | SERPINH1 | 871 | ENSG00000149257 | 23824327 | validated |
| mirtarbase | hsa-miR-21-5p   | KRIT1    | 889 | ENSG00000001631 | 22473208 | validated |
| mirtarbase | hsa-miR-212-3p  | CCNA2    | 890 | ENSG00000145386 | 21329664 | validated |
| mirtarbase | hsa-miR-301a-3p | CCNA2    | 890 | ENSG00000145386 | 23592263 | validated |
| mirtarbase | hsa-miR-212-3p  | CCNB1    | 891 | ENSG00000134057 | 21329664 | validated |
| mirtarbase | hsa-miR-106b-5p | CCND2    | 894 | ENSG00000118971 | 21283765 | validated |
| mirtarbase | hsa-miR-301a-3p | CCND2    | 894 | ENSG00000118971 | 23622248 | validated |
| mirtarbase | hsa-miR-15b-5p  | CCND2    | 894 | ENSG00000118971 | 21572407 | validated |
| mirtarbase | hsa-miR-505-3p  | CCND2    | 894 | ENSG00000118971 | 21572407 | validated |
| mirtarbase | hsa-miR-15b-5p  | CCND3    | 896 | ENSG00000112576 | 26144250 | validated |
| mirtarbase | hsa-miR-192-5p  | CCNE1    | 898 | ENSG00000105173 | 19074876 | validated |
| mirtarbase | hsa-miR-582-5p  | CCNF     | 899 | ENSG00000162063 | 23592263 | validated |
| mirtarbase | hsa-miR-181a-5p | CCNG1    | 900 | ENSG00000113328 | 17612493 | validated |
| mirtarbase | hsa-miR-21-5p   | CCNG1    | 900 | ENSG00000113328 | 18591254 | validated |
| mirtarbase | hsa-miR-15b-5p  | CCNT1    | 904 | ENSG00000129315 | 20371350 | validated |
| mirtarbase | hsa-miR-15b-5p  | CCNT2    | 905 | ENSG00000082258 | 22473208 | validated |
| mirtarbase | hsa-miR-18a-5p  | CCT6A    | 908 | ENSG00000146731 | 23622248 | validated |
| mirtarbase | hsa-miR-301a-3p | CCT6A    | 908 | ENSG00000146731 | 21572407 | validated |
| mirtarbase | hsa-miR-181a-5p | CD4      | 920 | ENSG00000010610 | 23393335 | validated |
| mirtarbase | hsa-miR-326     | CD9      | 928 | ENSG00000010278 | 19883630 | validated |
| mirtarbase | hsa-miR-106b-5p | CD28     | 940 | ENSG00000178562 | 23313552 | validated |
| mirtarbase | hsa-miR-106b-5p | CD34     | 947 | ENSG00000174059 | 17242205 | validated |
| mirtarbase | hsa-miR-222-3p  | SCARB2   | 950 | ENSG00000138760 | 23622248 | validated |
| mirtarbase | hsa-miR-15b-5p  | ENTPD1   | 953 | ENSG00000138185 | 22473208 | validated |
| mirtarbase | hsa-miR-15b-5p  | ENTPD6   | 955 | ENSG00000197586 | 22473208 | validated |
| mirtarbase | hsa-miR-192-5p  | ENTPD3   | 956 | ENSG00000168032 | 16822819 | validated |
| mirtarbase | hsa-miR-15b-5p  | CD44     | 960 | ENSG00000026508 | 23622248 | validated |
| mirtarbase | hsa-miR-21-5p   | CD47     | 961 | ENSG00000196776 | 18591254 | validated |
| mirtarbase | hsa-miR-505-3p  | CD47     | 961 | ENSG00000196776 | 23622248 | validated |
| mirtarbase | hsa-miR-106b-5p | CD47     | 961 | ENSG00000196776 | 22473208 | validated |
| mirtarbase | hsa-miR-192-5p  | CD47     | 961 | ENSG00000196776 | 26506238 | validated |
| mirtarbase | hsa-miR-582-5p  | CD81     | 975 | ENSG00000110651 | 23592263 | validated |
| mirtarbase | hsa-miR-15b-5p  | CDK1     | 983 | ENSG00000170312 | 23446348 | validated |
| mirtarbase | hsa-miR-505-3p  | CDC5L    | 988 | ENSG00000096401 | 23622248 | validated |

|            |                 |         |      |                 |          |           |
|------------|-----------------|---------|------|-----------------|----------|-----------|
| mirtarbase | hsa-miR-192-5p  | CDC20   | 991  | ENSG00000117399 | 19074876 | validated |
| mirtarbase | hsa-miR-18a-5p  | CDC20   | 991  | ENSG00000117399 | 23622248 | validated |
| mirtarbase | hsa-miR-192-5p  | CDC25A  | 993  | ENSG00000164045 | 19074876 | validated |
| mirtarbase | hsa-miR-15b-5p  | CDC25A  | 993  | ENSG00000164045 | 22473208 | validated |
| mirtarbase | hsa-miR-222-3p  | CDC27   | 996  | ENSG00000004897 | 20371350 | validated |
| mirtarbase | hsa-miR-15b-5p  | CDC27   | 996  | ENSG00000004897 | 22473208 | validated |
| mirtarbase | hsa-miR-106b-5p | CDC42   | 998  | ENSG00000070831 | 23622248 | validated |
| mirtarbase | hsa-miR-181a-5p | CDH13   | 1012 | ENSG00000140945 | 22942087 | validated |
| mirtarbase | hsa-miR-15b-5p  | CDK4    | 1019 | ENSG00000135446 | 23622248 | validated |
| mirtarbase | hsa-miR-301a-3p | CDK4    | 1019 | ENSG00000135446 | 23824327 | validated |
| mirtarbase | hsa-miR-15b-5p  | CDK6    | 1021 | ENSG00000105810 | 23592263 | validated |
| mirtarbase | hsa-miR-222-3p  | CDK6    | 1021 | ENSG00000105810 | 20371350 | validated |
| mirtarbase | hsa-miR-15b-5p  | CDKN1A  | 1026 | ENSG00000124762 | 22473208 | validated |
| mirtarbase | hsa-miR-582-5p  | CDKN1A  | 1026 | ENSG00000124762 | 23592263 | validated |
| mirtarbase | hsa-miR-181a-5p | CDKN1A  | 1026 | ENSG00000124762 | 25346652 | validated |
| mirtarbase | hsa-miR-212-3p  | CDKN1A  | 1026 | ENSG00000124762 | 26701625 | validated |
| mirtarbase | hsa-miR-192-5p  | CDKN1B  | 1027 | ENSG00000111276 | 17627278 | validated |
| mirtarbase | hsa-miR-192-5p  | CDKN2A  | 1029 | ENSG00000147889 | 19074876 | validated |
| mirtarbase | hsa-miR-192-5p  | CDKN2D  | 1032 | ENSG00000129355 | 19074876 | validated |
| mirtarbase | hsa-miR-192-5p  | CDKN3   | 1033 | ENSG00000100526 | 19074876 | validated |
| mirtarbase | hsa-miR-296-5p  | CDX1    | 1044 | ENSG00000113722 | 23353818 | validated |
| mirtarbase | hsa-miR-582-3p  | CEACAM5 | 1048 | ENSG00000105388 | 23824327 | validated |
| mirtarbase | hsa-miR-181a-5p | CEBPA   | 1050 | ENSG00000245848 | 27673564 | validated |
| mirtarbase | hsa-miR-21-5p   | CEBPB   | 1051 | ENSG00000172216 | 25327529 | validated |
| mirtarbase | hsa-miR-192-5p  | CENPA   | 1058 | ENSG00000115163 | 19074876 | validated |
| mirtarbase | hsa-miR-192-5p  | CENPE   | 1062 | ENSG00000138778 | 19074876 | validated |
| mirtarbase | hsa-miR-192-5p  | CENPF   | 1063 | ENSG00000117724 | 19074876 | validated |
| mirtarbase | hsa-miR-192-5p  | CFL2    | 1073 | ENSG00000165410 | 19074876 | validated |
| mirtarbase | hsa-miR-106b-5p | CFL2    | 1073 | ENSG00000165410 | 22473208 | validated |
| mirtarbase | hsa-miR-301a-3p | CFL2    | 1073 | ENSG00000165410 | 21572407 | validated |
| mirtarbase | hsa-miR-144-3p  | CFTR    | 1080 | ENSG00000001626 | 23226399 | validated |
| mirtarbase | hsa-miR-192-5p  | RCBTB2  | 1102 | ENSG00000136161 | 19074876 | validated |
| mirtarbase | hsa-miR-15b-5p  | CHEK1   | 1111 | ENSG00000149554 | 23622248 | validated |
| mirtarbase | hsa-miR-505-3p  | CHEK1   | 1111 | ENSG00000149554 | 23313552 | validated |
| mirtarbase | hsa-miR-21-5p   | FOXN3   | 1112 | ENSG00000053254 | 18591254 | validated |
| mirtarbase | hsa-miR-192-5p  | CHM     | 1121 | ENSG00000188419 | 19074876 | validated |
| mirtarbase | hsa-miR-192-5p  | CHML    | 1122 | ENSG00000203668 | 19074876 | validated |
| mirtarbase | hsa-miR-144-3p  | ERCC8   | 1161 | ENSG00000049167 | 20371350 | validated |
| mirtarbase | hsa-miR-15b-5p  | AP2M1   | 1173 | ENSG00000161203 | 23622248 | validated |
| mirtarbase | hsa-miR-301a-3p | CLCN3   | 1182 | ENSG00000109572 | 22012620 | validated |
| mirtarbase | hsa-miR-21-5p   | CLCN5   | 1184 | ENSG00000171365 | 18591254 | validated |
| mirtarbase | hsa-miR-15b-5p  | CLCN6   | 1185 | ENSG00000011021 | 23622248 | validated |
| mirtarbase | hsa-miR-21-5p   | CLU     | 1191 | ENSG00000120885 | 24327270 | validated |
| mirtarbase | hsa-miR-15b-5p  | CLU     | 1191 | ENSG00000120885 | 26701625 | validated |
| mirtarbase | hsa-miR-326     | CLU     | 1191 | ENSG00000120885 | 26701625 | validated |
| mirtarbase | hsa-miR-192-5p  | CLIC1   | 1192 | ENSG00000223639 | 16822819 | validated |
| mirtarbase | hsa-miR-192-5p  | CLK1    | 1195 | ENSG00000013441 | 19074876 | validated |
| mirtarbase | hsa-miR-301a-3p | TPP1    | 1200 | ENSG00000166340 | 23592263 | validated |
| mirtarbase | hsa-miR-106b-5p | CLTC    | 1213 | ENSG00000141367 | 23622248 | validated |
| mirtarbase | hsa-miR-21-5p   | CCR1    | 1230 | ENSG00000163823 | 21131358 | validated |
| mirtarbase | hsa-miR-301a-3p | CCR6    | 1235 | ENSG00000112486 | 23824327 | validated |
| mirtarbase | hsa-miR-21-5p   | CCR7    | 1236 | ENSG00000126353 | 22473208 | validated |
| mirtarbase | hsa-miR-21-5p   | COL4A1  | 1282 | ENSG00000187498 | 22573493 | validated |
| mirtarbase | hsa-miR-505-3p  | COL4A1  | 1282 | ENSG00000187498 | 23313552 | validated |
| mirtarbase | hsa-miR-21-5p   | COL5A2  | 1290 | ENSG00000204262 | 18591254 | validated |
| mirtarbase | hsa-miR-222-3p  | COL5A2  | 1290 | ENSG00000204262 | 23622248 | validated |
| mirtarbase | hsa-miR-181a-5p | COL16A1 | 1307 | ENSG00000084636 | 23238588 | validated |
| mirtarbase | hsa-miR-181a-5p | KLF6    | 1316 | ENSG00000067082 | 22581522 | validated |
| mirtarbase | hsa-miR-106b-5p | KLF6    | 1316 | ENSG00000067082 | 23592263 | validated |
| mirtarbase | hsa-miR-301a-3p | KLF6    | 1316 | ENSG00000067082 | 23592263 | validated |
| mirtarbase | hsa-miR-21-5p   | SLC31A1 | 1317 | ENSG00000136868 | 18591254 | validated |
| mirtarbase | hsa-miR-301a-3p | SLC31A1 | 1317 | ENSG00000136868 | 23824327 | validated |
| mirtarbase | hsa-miR-144-3p  | MAP3K8  | 1326 | ENSG00000107968 | 27717821 | validated |
| mirtarbase | hsa-miR-106b-5p | COX6B1  | 1340 | ENSG00000126267 | 20371350 | validated |
| mirtarbase | hsa-miR-18a-5p  | COX7B   | 1349 | ENSG00000131174 | 23622248 | validated |
| mirtarbase | hsa-miR-301a-3p | COX10   | 1352 | ENSG00000006695 | 23592263 | validated |
| mirtarbase | hsa-miR-144-3p  | COX10   | 1352 | ENSG00000006695 | 23592263 | validated |
| mirtarbase | hsa-miR-15b-5p  | CPOX    | 1371 | ENSG00000080819 | 23622248 | validated |
| mirtarbase | hsa-miR-106b-5p | CPOX    | 1371 | ENSG00000080819 | 22473208 | validated |
| mirtarbase | hsa-miR-181a-5p | CPOX    | 1371 | ENSG00000080819 | 22473208 | validated |
| mirtarbase | hsa-miR-144-3p  | CPS1    | 1373 | ENSG00000021826 | 23592263 | validated |

|            |                 |          |      |                 |          |           |
|------------|-----------------|----------|------|-----------------|----------|-----------|
| mirtarbase | hsa-miR-106b-5p | CPS1     | 1373 | ENSG00000021826 | 23313552 | validated |
| mirtarbase | hsa-miR-106b-5p | CPT1A    | 1374 | ENSG00000110090 | 23313552 | validated |
| mirtarbase | hsa-miR-106b-5p | CREB1    | 1385 | ENSG00000118260 | 23446348 | validated |
| mirtarbase | hsa-miR-582-5p  | CREB1    | 1385 | ENSG00000118260 | 26978739 | validated |
| mirtarbase | hsa-miR-21-5p   | ATF2     | 1386 | ENSG00000115966 | 18591254 | validated |
| mirtarbase | hsa-miR-192-5p  | CREBL2   | 1389 | ENSG00000111269 | 19074876 | validated |
| mirtarbase | hsa-miR-18a-5p  | CREBL2   | 1389 | ENSG00000111269 | 20371350 | validated |
| mirtarbase | hsa-miR-15b-5p  | CREBL2   | 1389 | ENSG00000111269 | 21572407 | validated |
| mirtarbase | hsa-miR-192-5p  | CRK      | 1398 | ENSG00000167193 | 19074876 | validated |
| mirtarbase | hsa-miR-15b-5p  | CRK      | 1398 | ENSG00000167193 | 23622248 | validated |
| mirtarbase | hsa-miR-106b-5p | CRK      | 1398 | ENSG00000167193 | 22473208 | validated |
| mirtarbase | hsa-miR-15b-5p  | CRKL     | 1399 | ENSG00000099942 | 21572407 | validated |
| mirtarbase | hsa-miR-21-5p   | HAPLN1   | 1404 | ENSG00000145681 | 18591254 | validated |
| mirtarbase | hsa-miR-106b-5p | CRY2     | 1408 | ENSG00000121671 | 22473208 | validated |
| mirtarbase | hsa-miR-505-3p  | CSE1L    | 1434 | ENSG00000124207 | 23824327 | validated |
| mirtarbase | hsa-miR-505-3p  | CSF1     | 1435 | ENSG00000184371 | 23622248 | validated |
| mirtarbase | hsa-miR-21-5p   | CSNK1A1  | 1452 | ENSG00000113712 | 18591254 | validated |
| mirtarbase | hsa-miR-106b-5p | CSNK1A1  | 1452 | ENSG00000113712 | 23592263 | validated |
| mirtarbase | hsa-miR-181a-5p | CSNK1A1  | 1452 | ENSG00000113712 | 21572407 | validated |
| mirtarbase | hsa-miR-505-3p  | CSNK1A1  | 1452 | ENSG00000113712 | 21572407 | validated |
| mirtarbase | hsa-miR-15b-5p  | CSNK1E   | 1454 | ENSG00000213923 | 23592263 | validated |
| mirtarbase | hsa-miR-301a-3p | CSNK2A1  | 1457 | ENSG00000101266 | 26701625 | validated |
| mirtarbase | hsa-miR-222-3p  | SLC25A10 | 1468 | ENSG00000183048 | 23622248 | validated |
| mirtarbase | hsa-miR-181a-5p | CST5     | 1473 | ENSG00000170367 | 17612493 | validated |
| mirtarbase | hsa-miR-18a-5p  | CCN2     | 1490 | ENSG00000118523 | 16331254 | validated |
| mirtarbase | hsa-miR-192-5p  | CTH      | 1491 | ENSG00000116761 | 19074876 | validated |
| mirtarbase | hsa-miR-181a-5p | CTNNB1   | 1499 | ENSG00000168036 | 28086904 | validated |
| mirtarbase | hsa-miR-106b-5p | CTSS     | 1520 | ENSG00000163131 | 22473208 | validated |
| mirtarbase | hsa-miR-505-3p  | CTSZ     | 1522 | ENSG00000101160 | 23622248 | validated |
| mirtarbase | hsa-miR-106b-5p | CYB5A    | 1528 | ENSG00000166347 | 23824327 | validated |
| mirtarbase | hsa-miR-15b-5p  | CYBA     | 1535 | ENSG00000051523 | 23622248 | validated |
| mirtarbase | hsa-miR-106b-5p | CYBB     | 1536 | ENSG00000165168 | 28235791 | validated |
| mirtarbase | hsa-miR-106b-5p | CYLD     | 1540 | ENSG00000083799 | 22473208 | validated |
| mirtarbase | hsa-miR-15b-5p  | CYLD     | 1540 | ENSG00000083799 | 22473208 | validated |
| mirtarbase | hsa-miR-192-5p  | CYP24A1  | 1591 | ENSG00000019186 | 19074876 | validated |
| mirtarbase | hsa-miR-15b-5p  | CYP51A1  | 1595 | ENSG00000001630 | 23622248 | validated |
| mirtarbase | hsa-miR-144-3p  | DAB2     | 1601 | ENSG00000153071 | 23592263 | validated |
| mirtarbase | hsa-miR-106b-5p | DAB2     | 1601 | ENSG00000153071 | 26769181 | validated |
| mirtarbase | hsa-miR-301a-3p | DAD1     | 1603 | ENSG00000129562 | 21572407 | validated |
| mirtarbase | hsa-miR-222-3p  | DAG1     | 1605 | ENSG00000173402 | 23622248 | validated |
| mirtarbase | hsa-miR-301a-3p | DAPK1    | 1612 | ENSG00000196730 | 21572407 | validated |
| mirtarbase | hsa-miR-222-3p  | DAXX     | 1616 | ENSG00000204209 | 23622248 | validated |
| mirtarbase | hsa-miR-222-3p  | DBN1     | 1627 | ENSG00000113758 | 23622248 | validated |
| mirtarbase | hsa-miR-192-5p  | DBT      | 1629 | ENSG00000137992 | 19074876 | validated |
| mirtarbase | hsa-miR-192-5p  | DDOST    | 1650 | ENSG00000244038 | 16822819 | validated |
| mirtarbase | hsa-miR-192-5p  | DDX3X    | 1654 | ENSG00000215301 | 16822819 | validated |
| mirtarbase | hsa-miR-181a-5p | DDX3X    | 1654 | ENSG00000215301 | 20371350 | validated |
| mirtarbase | hsa-miR-21-5p   | DDX3X    | 1654 | ENSG00000215301 | 18591254 | validated |
| mirtarbase | hsa-miR-15b-5p  | DDX3X    | 1654 | ENSG00000215301 | 24398324 | validated |
| mirtarbase | hsa-miR-505-3p  | DDX3X    | 1654 | ENSG00000215301 | 21572407 | validated |
| mirtarbase | hsa-miR-15b-5p  | DDX5     | 1655 | ENSG00000108654 | 23622248 | validated |
| mirtarbase | hsa-miR-18a-5p  | DDX5     | 1655 | ENSG00000108654 | 23622248 | validated |
| mirtarbase | hsa-miR-106b-5p | DDX5     | 1655 | ENSG00000108654 | 22473208 | validated |
| mirtarbase | hsa-miR-505-3p  | DDX6     | 1656 | ENSG00000110367 | 23622248 | validated |
| mirtarbase | hsa-miR-582-5p  | DDX6     | 1656 | ENSG00000110367 | 23592263 | validated |
| mirtarbase | hsa-miR-222-3p  | DDX6     | 1656 | ENSG00000110367 | 23592263 | validated |
| mirtarbase | hsa-miR-192-5p  | DDX6     | 1656 | ENSG00000110367 | 22012620 | validated |
| mirtarbase | hsa-miR-301a-3p | DDX6     | 1656 | ENSG00000110367 | 26701625 | validated |
| mirtarbase | hsa-miR-505-3p  | DHX9     | 1660 | ENSG00000135829 | 23622248 | validated |
| mirtarbase | hsa-miR-15b-5p  | DECR1    | 1666 | ENSG00000104325 | 21572407 | validated |
| mirtarbase | hsa-miR-192-5p  | COCH     | 1690 | ENSG00000100473 | 19074876 | validated |
| mirtarbase | hsa-miR-192-5p  | DHCR24   | 1718 | ENSG00000116133 | 19074876 | validated |
| mirtarbase | hsa-miR-15b-5p  | DHFR     | 1719 | ENSG00000228716 | 23622248 | validated |
| mirtarbase | hsa-miR-106b-5p | DHODH    | 1723 | ENSG00000102967 | 23824327 | validated |
| mirtarbase | hsa-miR-18a-5p  | DIAPH1   | 1729 | ENSG00000131504 | 23622248 | validated |
| mirtarbase | hsa-miR-15b-5p  | DIAPH1   | 1729 | ENSG00000131504 | 26701625 | validated |
| mirtarbase | hsa-miR-21-5p   | DLG1     | 1739 | ENSG00000075711 | 18591254 | validated |
| mirtarbase | hsa-miR-21-5p   | DMD      | 1756 | ENSG00000198947 | 18591254 | validated |
| mirtarbase | hsa-miR-15b-5p  | DMPK     | 1760 | ENSG00000104936 | 23446348 | validated |
| mirtarbase | hsa-miR-222-3p  | DMWD     | 1762 | ENSG00000185800 | 23622248 | validated |
| mirtarbase | hsa-miR-21-5p   | DYNC1LI2 | 1783 | ENSG00000135720 | 18591254 | validated |

|            |                 |          |      |                 |          |           |
|------------|-----------------|----------|------|-----------------|----------|-----------|
| mirtarbase | hsa-miR-106b-5p | DYNC1LI2 | 1783 | ENSG00000135720 | 22473208 | validated |
| mirtarbase | hsa-miR-301a-3p | DYNC1LI2 | 1783 | ENSG00000135720 | 21572407 | validated |
| mirtarbase | hsa-miR-181a-5p | DYNC1LI2 | 1783 | ENSG00000135720 | 22473208 | validated |
| mirtarbase | hsa-miR-582-5p  | DYNC1LI2 | 1783 | ENSG00000135720 | 27292025 | validated |
| mirtarbase | hsa-miR-18a-5p  | DNMT1    | 1786 | ENSG00000130816 | 23306545 | validated |
| mirtarbase | hsa-miR-106b-5p | DPYSL2   | 1808 | ENSG00000092964 | 22012620 | validated |
| mirtarbase | hsa-miR-301a-3p | DPYSL2   | 1808 | ENSG00000092964 | 22012620 | validated |
| mirtarbase | hsa-miR-582-5p  | DSC1     | 1823 | ENSG00000134765 | 27292025 | validated |
| mirtarbase | hsa-miR-15b-5p  | DSG2     | 1829 | ENSG00000046604 | 23622248 | validated |
| mirtarbase | hsa-miR-18a-5p  | TSC22D3  | 1831 | ENSG00000157514 | 19131573 | validated |
| mirtarbase | hsa-miR-505-3p  | TSC22D3  | 1831 | ENSG00000157514 | 23446348 | validated |
| mirtarbase | hsa-miR-106b-5p | DSPP     | 1834 | ENSG00000152591 | 20371350 | validated |
| mirtarbase | hsa-miR-192-5p  | SLC26A2  | 1836 | ENSG00000155850 | 19074876 | validated |
| mirtarbase | hsa-miR-21-5p   | SLC26A2  | 1836 | ENSG00000155850 | 18591254 | validated |
| mirtarbase | hsa-miR-192-5p  | HBEGF    | 1839 | ENSG00000113070 | 19074876 | validated |
| mirtarbase | hsa-miR-106b-5p | DUSP2    | 1844 | ENSG00000158050 | 23592263 | validated |
| mirtarbase | hsa-miR-181a-5p | DUSP5    | 1847 | ENSG00000138166 | 17382377 | validated |
| mirtarbase | hsa-miR-181a-5p | DUSP6    | 1848 | ENSG00000139318 | 17382377 | validated |
| mirtarbase | hsa-miR-21-5p   | DUSP8    | 1850 | ENSG00000273793 | 18591254 | validated |
| mirtarbase | hsa-miR-192-5p  | DYRK1A   | 1859 | ENSG00000157540 | 19074876 | validated |
| mirtarbase | hsa-miR-21-5p   | E2F2     | 1870 | ENSG00000007968 | 19528081 | validated |
| mirtarbase | hsa-miR-106b-5p | E2F2     | 1870 | ENSG00000007968 | 22473208 | validated |
| mirtarbase | hsa-miR-106b-5p | E2F3     | 1871 | ENSG00000112242 | 21283765 | validated |
| mirtarbase | hsa-miR-15b-5p  | E2F3     | 1871 | ENSG00000112242 | 22473208 | validated |
| mirtarbase | hsa-miR-21-5p   | E2F3     | 1871 | ENSG00000112242 | 21572407 | validated |
| mirtarbase | hsa-miR-192-5p  | E2F5     | 1875 | ENSG00000133740 | 16822819 | validated |
| mirtarbase | hsa-miR-106b-5p | E2F5     | 1875 | ENSG00000133740 | 23803041 | validated |
| mirtarbase | hsa-miR-181a-5p | E2F5     | 1875 | ENSG00000133740 | 24529171 | validated |
| mirtarbase | hsa-miR-106b-5p | GPR183   | 1880 | ENSG00000169508 | 26701625 | validated |
| mirtarbase | hsa-miR-15b-5p  | ECHS1    | 1892 | ENSG00000127884 | 23622248 | validated |
| mirtarbase | hsa-miR-192-5p  | ECT2     | 1894 | ENSG00000114346 | 19074876 | validated |
| mirtarbase | hsa-miR-301a-3p | EDN1     | 1906 | ENSG00000078401 | 23592263 | validated |
| mirtarbase | hsa-miR-192-5p  | PHC2     | 1912 | ENSG00000134686 | 19074876 | validated |
| mirtarbase | hsa-miR-505-3p  | EEF1A1   | 1915 | ENSG00000156508 | 23622248 | validated |
| mirtarbase | hsa-miR-106b-5p | EEF1A1   | 1915 | ENSG00000156508 | 23622248 | validated |
| mirtarbase | hsa-miR-15b-5p  | EEF1A1   | 1915 | ENSG00000156508 | 23622248 | validated |
| mirtarbase | hsa-miR-18a-5p  | EEF1A1   | 1915 | ENSG00000156508 | 23622248 | validated |
| mirtarbase | hsa-miR-192-5p  | EEF1A2   | 1917 | ENSG00000101210 | 19074876 | validated |
| mirtarbase | hsa-miR-222-3p  | EEF2     | 1938 | ENSG00000167658 | 23622248 | validated |
| mirtarbase | hsa-miR-18a-5p  | EEF2     | 1938 | ENSG00000167658 | 23622248 | validated |
| mirtarbase | hsa-miR-192-5p  | EFNB2    | 1948 | ENSG00000125266 | 19074876 | validated |
| mirtarbase | hsa-miR-582-5p  | EFNB2    | 1948 | ENSG00000125266 | 25176332 | validated |
| mirtarbase | hsa-miR-15b-5p  | EFNB2    | 1948 | ENSG00000125266 | 22012620 | validated |
| mirtarbase | hsa-miR-21-5p   | MEGF9    | 1955 | ENSG00000106780 | 18591254 | validated |
| mirtarbase | hsa-miR-222-3p  | MEGF9    | 1955 | ENSG00000106780 | 22815788 | validated |
| mirtarbase | hsa-miR-21-5p   | EGFR     | 1956 | ENSG00000146648 | 20864407 | validated |
| mirtarbase | hsa-miR-192-5p  | EGR1     | 1958 | ENSG00000120738 | 16822819 | validated |
| mirtarbase | hsa-miR-181a-5p | EGR1     | 1958 | ENSG00000120738 | 28077323 | validated |
| mirtarbase | hsa-miR-21-5p   | EIF1AX   | 1964 | ENSG00000173674 | 23446348 | validated |
| mirtarbase | hsa-miR-505-3p  | EIF1AX   | 1964 | ENSG00000173674 | 20371350 | validated |
| mirtarbase | hsa-miR-15b-5p  | EIF1AX   | 1964 | ENSG00000173674 | 23592263 | validated |
| mirtarbase | hsa-miR-21-5p   | EIF2S1   | 1965 | ENSG00000134001 | 19253296 | validated |
| mirtarbase | hsa-miR-192-5p  | EIF2S1   | 1965 | ENSG00000134001 | 20371350 | validated |
| mirtarbase | hsa-miR-222-3p  | EIF2S1   | 1965 | ENSG00000134001 | 23622248 | validated |
| mirtarbase | hsa-miR-106b-5p | EIF2S1   | 1965 | ENSG00000134001 | 21572407 | validated |
| mirtarbase | hsa-miR-212-3p  | EIF2S3   | 1968 | ENSG00000130741 | 20371350 | validated |
| mirtarbase | hsa-miR-144-3p  | EIF2S3   | 1968 | ENSG00000130741 | 20371350 | validated |
| mirtarbase | hsa-miR-222-3p  | EIF2S3   | 1968 | ENSG00000130741 | 26701625 | validated |
| mirtarbase | hsa-miR-15b-5p  | EIF4A1   | 1973 | ENSG00000161960 | 16609010 | validated |
| mirtarbase | hsa-miR-21-5p   | EIF4A2   | 1974 | ENSG00000156976 | 21219636 | validated |
| mirtarbase | hsa-miR-106b-5p | EIF4A2   | 1974 | ENSG00000156976 | 20371350 | validated |
| mirtarbase | hsa-miR-21-5p   | EIF4EBP2 | 1979 | ENSG00000148730 | 18591254 | validated |
| mirtarbase | hsa-miR-18a-5p  | EIF4EBP2 | 1979 | ENSG00000148730 | 23622248 | validated |
| mirtarbase | hsa-miR-582-3p  | EIF4EBP2 | 1979 | ENSG00000148730 | 27292025 | validated |
| mirtarbase | hsa-miR-106b-5p | EIF4G2   | 1982 | ENSG00000110321 | 22473208 | validated |
| mirtarbase | hsa-miR-582-5p  | EIF4G2   | 1982 | ENSG00000110321 | 21572407 | validated |
| mirtarbase | hsa-miR-21-5p   | EIF5     | 1983 | ENSG00000100664 | 18591254 | validated |
| mirtarbase | hsa-miR-106b-5p | ELAVL2   | 1993 | ENSG00000107105 | 22012620 | validated |
| mirtarbase | hsa-miR-296-5p  | ELAVL1   | 1994 | ENSG00000066044 | 26898797 | validated |
| mirtarbase | hsa-miR-296-5p  | ELAVL3   | 1995 | ENSG00000196361 | 23824327 | validated |
| mirtarbase | hsa-miR-582-5p  | ELAVL3   | 1995 | ENSG00000196361 | 27418678 | validated |

|            |                 |         |      |                 |          |           |
|------------|-----------------|---------|------|-----------------|----------|-----------|
| mirtarbase | hsa-miR-21-5p   | ELAVL4  | 1996 | ENSG00000162374 | 20584986 | validated |
| mirtarbase | hsa-miR-505-3p  | ELF4    | 2000 | ENSG00000102034 | 23622248 | validated |
| mirtarbase | hsa-miR-106b-5p | ELK3    | 2004 | ENSG00000111145 | 17242205 | validated |
| mirtarbase | hsa-miR-505-3p  | ELK3    | 2004 | ENSG00000111145 | 22012620 | validated |
| mirtarbase | hsa-miR-181a-5p | ELK4    | 2005 | ENSG00000158711 | 23824327 | validated |
| mirtarbase | hsa-miR-15b-5p  | ELK4    | 2005 | ENSG00000158711 | 23446348 | validated |
| mirtarbase | hsa-miR-106b-5p | ELK4    | 2005 | ENSG00000158711 | 23446348 | validated |
| mirtarbase | hsa-miR-192-5p  | EML1    | 2009 | ENSG00000066629 | 19074876 | validated |
| mirtarbase | hsa-miR-15b-5p  | EN2     | 2020 | ENSG00000164778 | 23446348 | validated |
| mirtarbase | hsa-miR-181a-5p | EN2     | 2020 | ENSG00000164778 | 19536157 | validated |
| mirtarbase | hsa-miR-222-3p  | ENO1    | 2023 | ENSG00000074800 | 23622248 | validated |
| mirtarbase | hsa-miR-15b-5p  | SLC29A1 | 2030 | ENSG00000112759 | 21572407 | validated |
| mirtarbase | hsa-miR-222-3p  | EPB41L2 | 2037 | ENSG00000079819 | 23622248 | validated |
| mirtarbase | hsa-miR-21-5p   | EPHA4   | 2043 | ENSG00000116106 | 18591254 | validated |
| mirtarbase | hsa-miR-505-3p  | EPHA4   | 2043 | ENSG00000116106 | 23622248 | validated |
| mirtarbase | hsa-miR-106b-5p | EPHA4   | 2043 | ENSG00000116106 | 21572407 | validated |
| mirtarbase | hsa-miR-181a-5p | EPHA5   | 2044 | ENSG00000145242 | 17612493 | validated |
| mirtarbase | hsa-miR-326     | EPHB3   | 2049 | ENSG00000182580 | 23824327 | validated |
| mirtarbase | hsa-miR-181a-5p | STX2    | 2054 | ENSG00000111450 | 22473208 | validated |
| mirtarbase | hsa-miR-18a-5p  | CLN8    | 2055 | ENSG00000182372 | 21572407 | validated |
| mirtarbase | hsa-miR-192-5p  | EPS8    | 2059 | ENSG00000151491 | 19074876 | validated |
| mirtarbase | hsa-miR-181a-5p | EPS8    | 2059 | ENSG00000151491 | 23446348 | validated |
| mirtarbase | hsa-miR-181a-5p | EPS15   | 2060 | ENSG00000085832 | 22473208 | validated |
| mirtarbase | hsa-miR-106b-5p | NR2F6   | 2063 | ENSG00000160113 | 23446348 | validated |
| mirtarbase | hsa-miR-582-5p  | NR2F6   | 2063 | ENSG00000160113 | 27292025 | validated |
| mirtarbase | hsa-miR-21-5p   | ERBB2   | 2064 | ENSG00000141736 | 19419954 | validated |
| mirtarbase | hsa-miR-326     | ERBB2   | 2064 | ENSG00000141736 | 23622248 | validated |
| mirtarbase | hsa-miR-181a-5p | EREG    | 2069 | ENSG00000124882 | 22815788 | validated |
| mirtarbase | hsa-miR-106b-5p | EREG    | 2069 | ENSG00000124882 | 26701625 | validated |
| mirtarbase | hsa-miR-301a-3p | EREG    | 2069 | ENSG00000124882 | 26701625 | validated |
| mirtarbase | hsa-miR-181a-5p | EYA4    | 2070 | ENSG00000112319 | 17612493 | validated |
| mirtarbase | hsa-miR-192-5p  | ERCC3   | 2071 | ENSG00000163161 | 19074876 | validated |
| mirtarbase | hsa-miR-192-5p  | ERCC4   | 2072 | ENSG00000175595 | 21672525 | validated |
| mirtarbase | hsa-miR-301a-3p | ESR1    | 2099 | ENSG00000091831 | 24398324 | validated |
| mirtarbase | hsa-miR-192-5p  | ESR1    | 2099 | ENSG00000091831 | 27304060 | validated |
| mirtarbase | hsa-miR-106b-5p | ESR2    | 2100 | ENSG00000140009 | 23313552 | validated |
| mirtarbase | hsa-miR-106b-5p | ETF1    | 2107 | ENSG00000120705 | 22473208 | validated |
| mirtarbase | hsa-miR-18a-5p  | ETFA    | 2108 | ENSG00000140374 | 23622248 | validated |
| mirtarbase | hsa-miR-222-3p  | ETS1    | 2113 | ENSG00000134954 | 21310411 | validated |
| mirtarbase | hsa-miR-181a-5p | ETS1    | 2113 | ENSG00000134954 | 23824327 | validated |
| mirtarbase | hsa-miR-144-3p  | ETS1    | 2113 | ENSG00000134954 | 26826553 | validated |
| mirtarbase | hsa-miR-18a-5p  | ETS2    | 2114 | ENSG00000157557 | 23622248 | validated |
| mirtarbase | hsa-miR-582-5p  | ETS2    | 2114 | ENSG00000157557 | 20371350 | validated |
| mirtarbase | hsa-miR-15b-5p  | EXT1    | 2131 | ENSG00000182197 | 21572407 | validated |
| mirtarbase | hsa-miR-192-5p  | EXTL2   | 2135 | ENSG00000162694 | 19074876 | validated |
| mirtarbase | hsa-miR-15b-5p  | EZH1    | 2145 | ENSG00000108799 | 22473208 | validated |
| mirtarbase | hsa-miR-106b-5p | EZH1    | 2145 | ENSG00000108799 | 22473208 | validated |
| mirtarbase | hsa-miR-144-3p  | EZH2    | 2146 | ENSG00000106462 | 23815091 | validated |
| mirtarbase | hsa-miR-106b-5p | F2R     | 2149 | ENSG00000181104 | 20371350 | validated |
| mirtarbase | hsa-miR-301a-3p | F2RL1   | 2150 | ENSG00000164251 | 23824327 | validated |
| mirtarbase | hsa-miR-106b-5p | F2RL1   | 2150 | ENSG00000164251 | 23313552 | validated |
| mirtarbase | hsa-miR-18a-5p  | F3      | 2152 | ENSG00000117525 | 23592263 | validated |
| mirtarbase | hsa-miR-106b-5p | F3      | 2152 | ENSG00000117525 | 23592263 | validated |
| mirtarbase | hsa-miR-326     | F9      | 2158 | ENSG00000101981 | 19536157 | validated |
| mirtarbase | hsa-miR-15b-5p  | FANCC   | 2176 | ENSG00000158169 | 23622248 | validated |
| mirtarbase | hsa-miR-505-3p  | FANCD2  | 2177 | ENSG00000144554 | 23622248 | validated |
| mirtarbase | hsa-miR-192-5p  | ACSL1   | 2180 | ENSG00000151726 | 19074876 | validated |
| mirtarbase | hsa-miR-106b-5p | ACSL4   | 2182 | ENSG00000068366 | 21572407 | validated |
| mirtarbase | hsa-miR-212-3p  | ACSL4   | 2182 | ENSG00000068366 | 21572407 | validated |
| mirtarbase | hsa-miR-301a-3p | ACSL4   | 2182 | ENSG00000068366 | 21572407 | validated |
| mirtarbase | hsa-miR-144-3p  | ACSL4   | 2182 | ENSG00000068366 | 21572407 | validated |
| mirtarbase | hsa-miR-222-3p  | BPTF    | 2186 | ENSG00000171634 | 23622248 | validated |
| mirtarbase | hsa-miR-326     | FASN    | 2194 | ENSG00000169710 | 23622248 | validated |
| mirtarbase | hsa-miR-222-3p  | FASN    | 2194 | ENSG00000169710 | 23622248 | validated |
| mirtarbase | hsa-miR-15b-5p  | FASN    | 2194 | ENSG00000169710 | 21572407 | validated |
| mirtarbase | hsa-miR-222-3p  | FAT1    | 2195 | ENSG00000083857 | 23622248 | validated |
| mirtarbase | hsa-miR-181a-5p | FAT1    | 2195 | ENSG00000083857 | 23622248 | validated |
| mirtarbase | hsa-miR-192-5p  | FBN1    | 2200 | ENSG00000166147 | 19074876 | validated |
| mirtarbase | hsa-miR-18a-5p  | FCGR2B  | 2213 | ENSG00000072694 | 24169826 | validated |
| mirtarbase | hsa-miR-301a-3p | FKTN    | 2218 | ENSG00000106692 | 19536157 | validated |
| mirtarbase | hsa-miR-192-5p  | FEN1    | 2237 | ENSG00000168496 | 19074876 | validated |

|            |                 |         |      |                 |          |           |
|------------|-----------------|---------|------|-----------------|----------|-----------|
| mirTarbase | hsa-miR-192-5p  | GPC4    | 2239 | ENSG00000076716 | 19074876 | validated |
| mirTarbase | hsa-miR-582-3p  | FER     | 2241 | ENSG00000151422 | 23824327 | validated |
| mirTarbase | hsa-miR-144-3p  | FGA     | 2243 | ENSG00000171560 | 20570858 | validated |
| mirTarbase | hsa-miR-144-3p  | FGB     | 2244 | ENSG00000171564 | 20570858 | validated |
| mirTarbase | hsa-miR-326     | FGF1    | 2246 | ENSG00000113578 | 26183397 | validated |
| mirTarbase | hsa-miR-192-5p  | FGF2    | 2247 | ENSG00000138685 | 19074876 | validated |
| mirTarbase | hsa-miR-15b-5p  | FGF2    | 2247 | ENSG00000138685 | 24560946 | validated |
| mirTarbase | hsa-miR-144-3p  | FGF2    | 2247 | ENSG00000138685 | 22012620 | validated |
| mirTarbase | hsa-miR-582-5p  | FGF2    | 2247 | ENSG00000138685 | 22012620 | validated |
| mirTarbase | hsa-miR-15b-5p  | FGF5    | 2250 | ENSG00000138675 | 23622248 | validated |
| mirTarbase | hsa-miR-21-5p   | FGF12   | 2257 | ENSG00000114279 | 23824327 | validated |
| mirTarbase | hsa-miR-296-5p  | FGFR1   | 2260 | ENSG00000077782 | 27714806 | validated |
| mirTarbase | hsa-miR-15b-5p  | FGFR4   | 2264 | ENSG00000160867 | 23592263 | validated |
| mirTarbase | hsa-miR-144-3p  | FGG     | 2266 | ENSG00000171557 | 20570858 | validated |
| mirTarbase | hsa-miR-181a-5p | FKBP1A  | 2280 | ENSG00000088832 | 21572407 | validated |
| mirTarbase | hsa-miR-15b-5p  | FKBP1A  | 2280 | ENSG00000088832 | 21572407 | validated |
| mirTarbase | hsa-miR-21-5p   | FKBP5   | 2289 | ENSG00000096060 | 18591254 | validated |
| mirTarbase | hsa-miR-106b-5p | FOXC1   | 2296 | ENSG00000054598 | 21572407 | validated |
| mirTarbase | hsa-miR-181a-5p | FOXL1   | 2300 | ENSG00000176678 | 21572407 | validated |
| mirTarbase | hsa-miR-15b-5p  | FOXO1   | 2308 | ENSG00000150907 | 24862853 | validated |
| mirTarbase | hsa-miR-222-3p  | FOXO1   | 2308 | ENSG00000150907 | 27746366 | validated |
| mirTarbase | hsa-miR-21-5p   | FOXO1   | 2308 | ENSG00000150907 | 25909227 | validated |
| mirTarbase | hsa-miR-222-3p  | FOXO3   | 2309 | ENSG00000118689 | 20388878 | validated |
| mirTarbase | hsa-miR-21-5p   | FOXO3   | 2309 | ENSG00000118689 | 20371350 | validated |
| mirTarbase | hsa-miR-144-3p  | MLANA   | 2315 | ENSG00000120215 | 22100165 | validated |
| mirTarbase | hsa-miR-222-3p  | FLNA    | 2316 | ENSG00000196924 | 23622248 | validated |
| mirTarbase | hsa-miR-15b-5p  | FLOT2   | 2319 | ENSG00000132589 | 22473208 | validated |
| mirTarbase | hsa-miR-582-5p  | FLT1    | 2321 | ENSG00000102755 | 24906430 | validated |
| mirTarbase | hsa-miR-21-5p   | FMOD    | 2331 | ENSG00000122176 | 19906824 | validated |
| mirTarbase | hsa-miR-21-5p   | FMR1    | 2332 | ENSG00000102081 | 18591254 | validated |
| mirTarbase | hsa-miR-181a-5p | FOS     | 2353 | ENSG00000170345 | 22956783 | validated |
| mirTarbase | hsa-miR-192-5p  | FOS     | 2353 | ENSG00000170345 | 19074876 | validated |
| mirTarbase | hsa-miR-222-3p  | FPGS    | 2356 | ENSG00000136877 | 23622248 | validated |
| mirTarbase | hsa-miR-326     | FPR1    | 2357 | ENSG00000171051 | 27418678 | validated |
| mirTarbase | hsa-miR-144-3p  | MTOR    | 2475 | ENSG00000198793 | 22983984 | validated |
| mirTarbase | hsa-miR-192-5p  | CENPI   | 2491 | ENSG00000102384 | 19074876 | validated |
| mirTarbase | hsa-miR-15b-5p  | FUT2    | 2524 | ENSG00000176920 | 24122375 | validated |
| mirTarbase | hsa-miR-106b-5p | FYN     | 2534 | ENSG00000010810 | 27520374 | validated |
| mirTarbase | hsa-miR-301a-3p | G6PC    | 2538 | ENSG00000131482 | 23592263 | validated |
| mirTarbase | hsa-miR-222-3p  | SLC37A4 | 2542 | ENSG00000137700 | 23622248 | validated |
| mirTarbase | hsa-miR-505-3p  | XRCC6   | 2547 | ENSG00000196419 | 23622248 | validated |
| mirTarbase | hsa-miR-326     | XRCC6   | 2547 | ENSG00000196419 | 23622248 | validated |
| mirTarbase | hsa-miR-106b-5p | GAB1    | 2549 | ENSG00000109458 | 22473208 | validated |
| mirTarbase | hsa-miR-106b-5p | GABBR1  | 2550 | ENSG00000206511 | 22473208 | validated |
| mirTarbase | hsa-miR-18a-5p  | GABPA   | 2551 | ENSG00000154727 | 20371350 | validated |
| mirTarbase | hsa-miR-15b-5p  | GABPA   | 2551 | ENSG00000154727 | 21572407 | validated |
| mirTarbase | hsa-miR-106b-5p | GABPB1  | 2553 | ENSG00000104064 | 22473208 | validated |
| mirTarbase | hsa-miR-192-5p  | GABPB1  | 2553 | ENSG00000104064 | 22012620 | validated |
| mirTarbase | hsa-miR-301a-3p | GAK     | 2580 | ENSG00000178950 | 23622248 | validated |
| mirTarbase | hsa-miR-106b-5p | GAK     | 2580 | ENSG00000178950 | 22473208 | validated |
| mirTarbase | hsa-miR-15b-5p  | GALNT1  | 2589 | ENSG00000141429 | 21572407 | validated |
| mirTarbase | hsa-miR-222-3p  | GALNT3  | 2591 | ENSG00000115339 | 22012620 | validated |
| mirTarbase | hsa-miR-505-3p  | GAS1    | 2619 | ENSG00000180447 | 21572407 | validated |
| mirTarbase | hsa-miR-106b-5p | GATA6   | 2627 | ENSG00000141448 | 24398324 | validated |
| mirTarbase | hsa-miR-192-5p  | GATM    | 2628 | ENSG00000171766 | 19074876 | validated |
| mirTarbase | hsa-miR-106b-5p | GBP3    | 2635 | ENSG00000117226 | 22473208 | validated |
| mirTarbase | hsa-miR-192-5p  | GCH1    | 2643 | ENSG00000131979 | 19074876 | validated |
| mirTarbase | hsa-miR-18a-5p  | GCH1    | 2643 | ENSG00000131979 | 23622248 | validated |
| mirTarbase | hsa-miR-181a-5p | NR6A1   | 2649 | ENSG00000148200 | 20371350 | validated |
| mirTarbase | hsa-miR-15b-5p  | NR6A1   | 2649 | ENSG00000148200 | 23592263 | validated |
| mirTarbase | hsa-miR-181a-5p | GCNT1   | 2650 | ENSG00000187210 | 17612493 | validated |
| mirTarbase | hsa-miR-222-3p  | GDI1    | 2664 | ENSG00000203879 | 23622248 | validated |
| mirTarbase | hsa-miR-222-3p  | GDI2    | 2665 | ENSG00000057608 | 23622248 | validated |
| mirTarbase | hsa-miR-505-3p  | GGCX    | 2677 | ENSG00000115486 | 23824327 | validated |
| mirTarbase | hsa-miR-15b-5p  | B4GALT1 | 2683 | ENSG00000086062 | 23622248 | validated |
| mirTarbase | hsa-miR-18a-5p  | B4GALT1 | 2683 | ENSG00000086062 | 23622248 | validated |
| mirTarbase | hsa-miR-582-3p  | B4GALT1 | 2683 | ENSG00000086062 | 23592263 | validated |
| mirTarbase | hsa-miR-296-5p  | B4GALT1 | 2683 | ENSG00000086062 | 23313552 | validated |
| mirTarbase | hsa-miR-222-3p  | GJA1    | 2697 | ENSG00000152661 | 22294051 | validated |
| mirTarbase | hsa-miR-21-5p   | GLG1    | 2734 | ENSG00000090863 | 18591254 | validated |
| mirTarbase | hsa-miR-326     | GLI1    | 2735 | ENSG00000111087 | 18756266 | validated |

|            |                 |          |      |                 |          |           |
|------------|-----------------|----------|------|-----------------|----------|-----------|
| mirtarbase | hsa-miR-222-3p  | GLO1     | 2739 | ENSG00000124767 | 23622248 | validated |
| mirtarbase | hsa-miR-106b-5p | GLO1     | 2739 | ENSG00000124767 | 22473208 | validated |
| mirtarbase | hsa-miR-301a-3p | GMFB     | 2764 | ENSG00000197045 | 23592263 | validated |
| mirtarbase | hsa-miR-222-3p  | GNAI2    | 2771 | ENSG00000114353 | 27811362 | validated |
| mirtarbase | hsa-miR-181a-5p | GNAI3    | 2773 | ENSG00000065135 | 20371350 | validated |
| mirtarbase | hsa-miR-222-3p  | GNAI3    | 2773 | ENSG00000065135 | 25444921 | validated |
| mirtarbase | hsa-miR-15b-5p  | GNAL     | 2774 | ENSG00000141404 | 23592263 | validated |
| mirtarbase | hsa-miR-21-5p   | GNAQ     | 2776 | ENSG00000156052 | 18591254 | validated |
| mirtarbase | hsa-miR-106b-5p | GNAS     | 2778 | ENSG00000087460 | 22473208 | validated |
| mirtarbase | hsa-miR-18a-5p  | GNAS     | 2778 | ENSG00000087460 | 23592263 | validated |
| mirtarbase | hsa-miR-15b-5p  | GNAT1    | 2779 | ENSG00000114349 | 21572407 | validated |
| mirtarbase | hsa-miR-15b-5p  | GNB1     | 2782 | ENSG00000078369 | 22473208 | validated |
| mirtarbase | hsa-miR-582-5p  | GNB1     | 2782 | ENSG00000078369 | 21572407 | validated |
| mirtarbase | hsa-miR-212-3p  | GNB1     | 2782 | ENSG00000078369 | 21572407 | validated |
| mirtarbase | hsa-miR-296-5p  | GNB2     | 2783 | ENSG00000172354 | 23592263 | validated |
| mirtarbase | hsa-miR-18a-5p  | GNL1     | 2794 | ENSG00000206492 | 23592263 | validated |
| mirtarbase | hsa-miR-192-5p  | GNRH1    | 2796 | ENSG00000147437 | 19074876 | validated |
| mirtarbase | hsa-miR-106b-5p | GNS      | 2799 | ENSG00000135677 | 22473208 | validated |
| mirtarbase | hsa-miR-181a-5p | GNS      | 2799 | ENSG00000135677 | 22473208 | validated |
| mirtarbase | hsa-miR-106b-5p | GOLGA1   | 2800 | ENSG00000136935 | 22473208 | validated |
| mirtarbase | hsa-miR-181a-5p | GOLGA1   | 2800 | ENSG00000136935 | 22473208 | validated |
| mirtarbase | hsa-miR-106b-5p | GOLGA2   | 2801 | ENSG00000167110 | 19536157 | validated |
| mirtarbase | hsa-miR-21-5p   | GOLGA4   | 2803 | ENSG00000144674 | 18591254 | validated |
| mirtarbase | hsa-miR-181a-5p | GOT1     | 2805 | ENSG00000120053 | 22473208 | validated |
| mirtarbase | hsa-miR-301a-3p | GP2      | 2813 | ENSG00000169347 | 23824327 | validated |
| mirtarbase | hsa-miR-21-5p   | GP5      | 2814 | ENSG00000178732 | 22012620 | validated |
| mirtarbase | hsa-miR-21-5p   | GPD2     | 2820 | ENSG00000115159 | 18591254 | validated |
| mirtarbase | hsa-miR-505-3p  | GPLD1    | 2822 | ENSG00000112293 | 23622248 | validated |
| mirtarbase | hsa-miR-106b-5p | GPM6A    | 2823 | ENSG00000150625 | 17242205 | validated |
| mirtarbase | hsa-miR-192-5p  | GPR19    | 2842 | ENSG00000183150 | 19074876 | validated |
| mirtarbase | hsa-miR-15b-5p  | GPR27    | 2850 | ENSG00000170837 | 21572407 | validated |
| mirtarbase | hsa-miR-192-5p  | GPR37    | 2861 | ENSG00000170775 | 19074876 | validated |
| mirtarbase | hsa-miR-326     | GRK6     | 2870 | ENSG00000198055 | 23622248 | validated |
| mirtarbase | hsa-miR-21-5p   | MKNK2    | 2872 | ENSG00000099875 | 18591254 | validated |
| mirtarbase | hsa-miR-106b-5p | MKNK2    | 2872 | ENSG00000099875 | 22473208 | validated |
| mirtarbase | hsa-miR-15b-5p  | GRB2     | 2885 | ENSG00000177885 | 21572407 | validated |
| mirtarbase | hsa-miR-222-3p  | GRB10    | 2887 | ENSG00000106070 | 23622248 | validated |
| mirtarbase | hsa-miR-301a-3p | GRB10    | 2887 | ENSG00000106070 | 23446348 | validated |
| mirtarbase | hsa-miR-192-5p  | GRIA1    | 2890 | ENSG00000155511 | 16822819 | validated |
| mirtarbase | hsa-miR-144-3p  | GRIK3    | 2899 | ENSG00000163873 | 23446348 | validated |
| mirtarbase | hsa-miR-18a-5p  | NR3C1    | 2908 | ENSG00000113580 | 19131573 | validated |
| mirtarbase | hsa-miR-144-3p  | NR3C1    | 2908 | ENSG00000113580 | 20371350 | validated |
| mirtarbase | hsa-miR-106b-5p | NR3C1    | 2908 | ENSG00000113580 | 27292025 | validated |
| mirtarbase | hsa-miR-106b-5p | ARHGAP35 | 2909 | ENSG00000160007 | 22473208 | validated |
| mirtarbase | hsa-miR-582-3p  | GRM5     | 2915 | ENSG00000168959 | 23446348 | validated |
| mirtarbase | hsa-miR-582-3p  | GRM6     | 2916 | ENSG00000113262 | 23824327 | validated |
| mirtarbase | hsa-miR-301a-3p | GRSF1    | 2926 | ENSG00000132463 | 27292025 | validated |
| mirtarbase | hsa-miR-15b-5p  | GSK3B    | 2932 | ENSG00000082701 | 22473208 | validated |
| mirtarbase | hsa-miR-181a-5p | GSTM2    | 2946 | ENSG00000213366 | 17612493 | validated |
| mirtarbase | hsa-miR-21-5p   | MSH6     | 2956 | ENSG00000116062 | 21078976 | validated |
| mirtarbase | hsa-miR-192-5p  | MSH6     | 2956 | ENSG00000116062 | 19074876 | validated |
| mirtarbase | hsa-miR-106b-5p | MSH6     | 2956 | ENSG00000116062 | 23622248 | validated |
| mirtarbase | hsa-miR-21-5p   | GTF2A1   | 2957 | ENSG00000165417 | 18591254 | validated |
| mirtarbase | hsa-miR-106b-5p | GTF2H3   | 2967 | ENSG00000111358 | 23313552 | validated |
| mirtarbase | hsa-miR-21-5p   | GTF2I    | 2969 | ENSG00000263001 | 18591254 | validated |
| mirtarbase | hsa-miR-326     | GYS1     | 2997 | ENSG00000104812 | 19536157 | validated |
| mirtarbase | hsa-miR-181a-5p | H1-0     | 3005 | ENSG00000189060 | 20371350 | validated |
| mirtarbase | hsa-miR-106b-5p | H2BC5    | 3017 | ENSG00000158373 | 21572407 | validated |
| mirtarbase | hsa-miR-192-5p  | H3-3A    | 3020 | ENSG00000163041 | 28217257 | validated |
| mirtarbase | hsa-miR-181a-5p | H3-3B    | 3021 | ENSG00000132475 | 20371350 | validated |
| mirtarbase | hsa-miR-505-3p  | H3-3B    | 3021 | ENSG00000132475 | 23446348 | validated |
| mirtarbase | hsa-miR-301a-3p | HADHB    | 3032 | ENSG00000138029 | 22012620 | validated |
| mirtarbase | hsa-miR-192-5p  | HADH     | 3033 | ENSG00000138796 | 19074876 | validated |
| mirtarbase | hsa-miR-106b-5p | HAS2     | 3037 | ENSG00000170961 | 22927820 | validated |
| mirtarbase | hsa-miR-192-5p  | HAS3     | 3038 | ENSG00000103044 | 19074876 | validated |
| mirtarbase | hsa-miR-222-3p  | HCFC1    | 3054 | ENSG00000172534 | 23622248 | validated |
| mirtarbase | hsa-miR-106b-5p | HTT      | 3064 | ENSG00000197386 | 23622248 | validated |
| mirtarbase | hsa-miR-222-3p  | HDGF     | 3068 | ENSG00000143321 | 23622248 | validated |
| mirtarbase | hsa-miR-15b-5p  | HDGF     | 3068 | ENSG00000143321 | 23592263 | validated |
| mirtarbase | hsa-miR-222-3p  | HDLBP    | 3069 | ENSG00000115677 | 23622248 | validated |
| mirtarbase | hsa-miR-505-3p  | HDLBP    | 3069 | ENSG00000115677 | 23592263 | validated |



|            |                 |           |      |                 |          |           |
|------------|-----------------|-----------|------|-----------------|----------|-----------|
| mirtarbase | hsa-miR-582-5p  | HFE       | 3077 | ENSG00000010704 | 27292025 | validated |
| mirtarbase | hsa-miR-18a-5p  | HIF1A     | 3091 | ENSG00000100644 | 20371350 | validated |
| mirtarbase | hsa-miR-106b-5p | HIF1A     | 3091 | ENSG00000100644 | 22473208 | validated |
| mirtarbase | hsa-miR-21-5p   | HIF1A     | 3091 | ENSG00000100644 | 23726431 | validated |
| mirtarbase | hsa-miR-106b-5p | HIP1      | 3092 | ENSG00000127946 | 23824327 | validated |
| mirtarbase | hsa-miR-192-5p  | UBE2K     | 3093 | ENSG00000078140 | 22100165 | validated |
| mirtarbase | hsa-miR-326     | HLA-C     | 3107 | ENSG00000206435 | 26701625 | validated |
| mirtarbase | hsa-miR-582-5p  | MNX1      | 3110 | ENSG00000130675 | 23446348 | validated |
| mirtarbase | hsa-miR-106b-5p | HMGB1     | 3146 | ENSG00000189403 | 23446348 | validated |
| mirtarbase | hsa-miR-21-5p   | HMGB1     | 3146 | ENSG00000189403 | 25327529 | validated |
| mirtarbase | hsa-miR-181a-5p | HMGB2     | 3148 | ENSG00000164104 | 17612493 | validated |
| mirtarbase | hsa-miR-582-5p  | HMGB2     | 3148 | ENSG00000164104 | 23592263 | validated |
| mirtarbase | hsa-miR-106b-5p | HMGB2     | 3148 | ENSG00000164104 | 20371350 | validated |
| mirtarbase | hsa-miR-106b-5p | HMGB3     | 3149 | ENSG00000029993 | 23592263 | validated |
| mirtarbase | hsa-miR-21-5p   | HMGB3     | 3149 | ENSG00000029993 | 18591254 | validated |
| mirtarbase | hsa-miR-106b-5p | HMGCL     | 3155 | ENSG00000117305 | 23622248 | validated |
| mirtarbase | hsa-miR-192-5p  | HMGCS1    | 3157 | ENSG00000112972 | 19074876 | validated |
| mirtarbase | hsa-miR-18a-5p  | HMGCS1    | 3157 | ENSG00000112972 | 20371350 | validated |
| mirtarbase | hsa-miR-222-3p  | HMGA1     | 3159 | ENSG00000137309 | 23622248 | validated |
| mirtarbase | hsa-miR-15b-5p  | HMGA1     | 3159 | ENSG00000137309 | 22473208 | validated |
| mirtarbase | hsa-miR-296-5p  | HMGA1     | 3159 | ENSG00000137309 | 26898758 | validated |
| mirtarbase | hsa-miR-192-5p  | HMMR      | 3161 | ENSG00000072571 | 19074876 | validated |
| mirtarbase | hsa-miR-106b-5p | HMMR      | 3161 | ENSG00000072571 | 23622248 | validated |
| mirtarbase | hsa-miR-192-5p  | FOXA1     | 3169 | ENSG00000129514 | 19074876 | validated |
| mirtarbase | hsa-miR-15b-5p  | HNRNPA1   | 3178 | ENSG00000135486 | 23313552 | validated |
| mirtarbase | hsa-miR-326     | HNRNPA1   | 3178 | ENSG00000135486 | 23313552 | validated |
| mirtarbase | hsa-miR-15b-5p  | HNRNPA2B1 | 3181 | ENSG00000122566 | 20371350 | validated |
| mirtarbase | hsa-miR-181a-5p | HNRNPAB   | 3182 | ENSG00000197451 | 23622248 | validated |
| mirtarbase | hsa-miR-144-3p  | HNRNPAB   | 3182 | ENSG00000197451 | 20371350 | validated |
| mirtarbase | hsa-miR-222-3p  | HNRNPD    | 3184 | ENSG00000138668 | 23622248 | validated |
| mirtarbase | hsa-miR-505-3p  | HNRNPF    | 3185 | ENSG00000169813 | 23622248 | validated |
| mirtarbase | hsa-miR-144-3p  | HNRNPF    | 3185 | ENSG00000169813 | 23592263 | validated |
| mirtarbase | hsa-miR-21-5p   | HNRNPH1   | 3187 | ENSG00000169045 | 18591254 | validated |
| mirtarbase | hsa-miR-222-3p  | HNRNPH1   | 3187 | ENSG00000169045 | 23622248 | validated |
| mirtarbase | hsa-miR-181a-5p | HNRNPH1   | 3187 | ENSG00000169045 | 27418678 | validated |
| mirtarbase | hsa-miR-15b-5p  | HNRNPH3   | 3189 | ENSG00000096746 | 23622248 | validated |
| mirtarbase | hsa-miR-15b-5p  | HNRNPK    | 3190 | ENSG00000165119 | 23622248 | validated |
| mirtarbase | hsa-miR-106b-5p | HNRNPL    | 3191 | ENSG00000104824 | 23622248 | validated |
| mirtarbase | hsa-miR-144-3p  | HNRNPU    | 3192 | ENSG00000153187 | 26701625 | validated |
| mirtarbase | hsa-miR-15b-5p  | HOXA3     | 3200 | ENSG00000105997 | 23592263 | validated |
| mirtarbase | hsa-miR-301a-3p | HOXA5     | 3202 | ENSG00000106004 | 21572407 | validated |
| mirtarbase | hsa-miR-21-5p   | HOXA9     | 3205 | ENSG00000078399 | 18591254 | validated |
| mirtarbase | hsa-miR-18a-5p  | HOXA9     | 3205 | ENSG00000078399 | 20371350 | validated |
| mirtarbase | hsa-miR-505-3p  | HOXA9     | 3205 | ENSG00000078399 | 21572407 | validated |
| mirtarbase | hsa-miR-192-5p  | HOXA10    | 3206 | ENSG00000253293 | 19074876 | validated |
| mirtarbase | hsa-miR-144-3p  | HOXA10    | 3206 | ENSG00000253293 | 23446348 | validated |
| mirtarbase | hsa-miR-15b-5p  | HOXA10    | 3206 | ENSG00000253293 | 21572407 | validated |
| mirtarbase | hsa-miR-192-5p  | HOXA13    | 3209 | ENSG00000106031 | 19074876 | validated |
| mirtarbase | hsa-miR-222-3p  | HOXA13    | 3209 | ENSG00000106031 | 23622248 | validated |
| mirtarbase | hsa-miR-301a-3p | HOXB3     | 3213 | ENSG00000120093 | 21572407 | validated |
| mirtarbase | hsa-miR-192-5p  | HOXB9     | 3219 | ENSG00000170689 | 19074876 | validated |
| mirtarbase | hsa-miR-212-3p  | HOXC4     | 3221 | ENSG00000198353 | 23592263 | validated |
| mirtarbase | hsa-miR-15b-5p  | HOXC8     | 3224 | ENSG00000037965 | 21572407 | validated |
| mirtarbase | hsa-miR-301a-3p | HOXD11    | 3237 | ENSG00000128713 | 21572407 | validated |
| mirtarbase | hsa-miR-106b-5p | HOXD11    | 3237 | ENSG00000128713 | 21572407 | validated |
| mirtarbase | hsa-miR-21-5p   | HPGD      | 3248 | ENSG00000164120 | 24699315 | validated |
| mirtarbase | hsa-miR-301a-3p | HPRT1     | 3251 | ENSG00000165704 | 20371350 | validated |
| mirtarbase | hsa-miR-181a-5p | HRAS      | 3265 | ENSG00000276536 | 21167132 | validated |
| mirtarbase | hsa-miR-18a-5p  | AGFG1     | 3267 | ENSG00000173744 | 23446348 | validated |
| mirtarbase | hsa-miR-106b-5p | AGFG2     | 3268 | ENSG00000106351 | 22473208 | validated |
| mirtarbase | hsa-miR-192-5p  | HRH1      | 3269 | ENSG00000196639 | 19074876 | validated |
| mirtarbase | hsa-miR-222-3p  | HES1      | 3280 | ENSG00000114315 | 23622248 | validated |
| mirtarbase | hsa-miR-181a-5p | HSD17B3   | 3293 | ENSG00000130948 | 17612493 | validated |
| mirtarbase | hsa-miR-15b-5p  | DNAJA1    | 3301 | ENSG00000086061 | 24398324 | validated |
| mirtarbase | hsa-miR-582-5p  | DNAJA1    | 3301 | ENSG00000086061 | 23446348 | validated |
| mirtarbase | hsa-miR-505-3p  | HSPA1B    | 3304 | ENSG00000231555 | 23622248 | validated |
| mirtarbase | hsa-miR-326     | HSPA1B    | 3304 | ENSG00000231555 | 23622248 | validated |
| mirtarbase | hsa-miR-106b-5p | HSPA1B    | 3304 | ENSG00000231555 | 23622248 | validated |
| mirtarbase | hsa-miR-212-3p  | HSPA1B    | 3304 | ENSG00000231555 | 21572407 | validated |
| mirtarbase | hsa-miR-15b-5p  | HSPA1B    | 3304 | ENSG00000231555 | 22473208 | validated |
| mirtarbase | hsa-miR-181a-5p | HSPA1B    | 3304 | ENSG00000231555 | 24398324 | validated |

|            |                 |          |      |                 |          |           |
|------------|-----------------|----------|------|-----------------|----------|-----------|
| mirTarbase | hsa-miR-192-5p  | HSPA2    | 3306 | ENSG00000126803 | 19074876 | validated |
| mirTarbase | hsa-miR-15b-5p  | HSPA8    | 3312 | ENSG00000109971 | 23622248 | validated |
| mirTarbase | hsa-miR-106b-5p | HSPA8    | 3312 | ENSG00000109971 | 23592263 | validated |
| mirTarbase | hsa-miR-301a-3p | HSPA8    | 3312 | ENSG00000109971 | 23592263 | validated |
| mirTarbase | hsa-miR-222-3p  | HSP90AA1 | 3320 | ENSG00000080824 | 23622248 | validated |
| mirTarbase | hsa-miR-582-5p  | HSP90AA1 | 3320 | ENSG00000080824 | 21572407 | validated |
| mirTarbase | hsa-miR-15b-5p  | HSP90AB1 | 3326 | ENSG00000096384 | 23622248 | validated |
| mirTarbase | hsa-miR-21-5p   | FOXN2    | 3344 | ENSG00000170802 | 23592263 | validated |
| mirTarbase | hsa-miR-222-3p  | IARS1    | 3376 | ENSG00000196305 | 23622248 | validated |
| mirTarbase | hsa-miR-222-3p  | ICAM1    | 3383 | ENSG00000090339 | 19949084 | validated |
| mirTarbase | hsa-miR-21-5p   | ICAM1    | 3383 | ENSG00000090339 | 21131358 | validated |
| mirTarbase | hsa-miR-192-5p  | ICAM3    | 3385 | ENSG00000076662 | 19074876 | validated |
| mirTarbase | hsa-miR-192-5p  | ID1      | 3397 | ENSG00000125968 | 19074876 | validated |
| mirTarbase | hsa-miR-192-5p  | ID2      | 3398 | ENSG00000115738 | 19074876 | validated |
| mirTarbase | hsa-miR-192-5p  | ID4      | 3400 | ENSG00000172201 | 20371350 | validated |
| mirTarbase | hsa-miR-18a-5p  | ID4      | 3400 | ENSG00000172201 | 20371350 | validated |
| mirTarbase | hsa-miR-181a-5p | ID4      | 3400 | ENSG00000172201 | 20371350 | validated |
| mirTarbase | hsa-miR-505-3p  | ID4      | 3400 | ENSG00000172201 | 20371350 | validated |
| mirTarbase | hsa-miR-192-5p  | IDI1     | 3422 | ENSG00000067064 | 19074876 | validated |
| mirTarbase | hsa-miR-181a-5p | IDS      | 3423 | ENSG00000010404 | 17612493 | validated |
| mirTarbase | hsa-miR-181a-5p | CFI      | 3426 | ENSG00000205403 | 17612493 | validated |
| mirTarbase | hsa-miR-106b-5p | IFNAR1   | 3454 | ENSG00000142166 | 22473208 | validated |
| mirTarbase | hsa-miR-106b-5p | IFNAR2   | 3455 | ENSG00000159110 | 17242205 | validated |
| mirTarbase | hsa-miR-18a-5p  | IFNAR2   | 3455 | ENSG00000159110 | 23446348 | validated |
| mirTarbase | hsa-miR-15b-5p  | IFNG     | 3458 | ENSG00000111537 | 22379033 | validated |
| mirTarbase | hsa-miR-181a-5p | IFNG     | 3458 | ENSG00000111537 | 24704866 | validated |
| mirTarbase | hsa-miR-15b-5p  | IFNGR2   | 3460 | ENSG00000262795 | 23622248 | validated |
| mirTarbase | hsa-miR-192-5p  | IFRD1    | 3475 | ENSG00000006652 | 19074876 | validated |
| mirTarbase | hsa-miR-505-3p  | IGF1     | 3479 | ENSG00000017427 | 22012620 | validated |
| mirTarbase | hsa-miR-192-5p  | IGF1R    | 3480 | ENSG00000140443 | 19074876 | validated |
| mirTarbase | hsa-miR-21-5p   | IGF1R    | 3480 | ENSG00000140443 | 24161401 | validated |
| mirTarbase | hsa-miR-301a-3p | IGF2R    | 3482 | ENSG00000197081 | 19536157 | validated |
| mirTarbase | hsa-miR-301a-3p | IGFBP5   | 3488 | ENSG00000115461 | 20371350 | validated |
| mirTarbase | hsa-miR-18a-5p  | IGHMBP2  | 3508 | ENSG00000132740 | 23622248 | validated |
| mirTarbase | hsa-miR-18a-5p  | RBPJ     | 3516 | ENSG00000168214 | 23622248 | validated |
| mirTarbase | hsa-miR-15b-5p  | RBPJ     | 3516 | ENSG00000168214 | 23592263 | validated |
| mirTarbase | hsa-miR-326     | IHH      | 3549 | ENSG00000163501 | 22100165 | validated |
| mirTarbase | hsa-miR-181a-5p | IL1A     | 3552 | ENSG00000115008 | 22473208 | validated |
| mirTarbase | hsa-miR-21-5p   | IL1B     | 3553 | ENSG00000125538 | 21131358 | validated |
| mirTarbase | hsa-miR-192-5p  | IL1R1    | 3554 | ENSG00000115594 | 19074876 | validated |
| mirTarbase | hsa-miR-192-5p  | IL1RAP   | 3556 | ENSG00000196083 | 19074876 | validated |
| mirTarbase | hsa-miR-192-5p  | IL6R     | 3570 | ENSG00000160712 | 23313552 | validated |
| mirTarbase | hsa-miR-192-5p  | IL6ST    | 3572 | ENSG00000134352 | 19074876 | validated |
| mirTarbase | hsa-miR-192-5p  | IL7      | 3574 | ENSG00000104432 | 19074876 | validated |
| mirTarbase | hsa-miR-21-5p   | IL12A    | 3592 | ENSG00000168811 | 22815788 | validated |
| mirTarbase | hsa-miR-192-5p  | IL15     | 3600 | ENSG00000164136 | 19074876 | validated |
| mirTarbase | hsa-miR-106b-5p | FOXK2    | 3607 | ENSG00000141568 | 22473208 | validated |
| mirTarbase | hsa-miR-222-3p  | ILK      | 3611 | ENSG00000166333 | 23622248 | validated |
| mirTarbase | hsa-miR-192-5p  | IMPA1    | 3612 | ENSG00000133731 | 19074876 | validated |
| mirTarbase | hsa-miR-181a-5p | INCENP   | 3619 | ENSG00000149503 | 17612493 | validated |
| mirTarbase | hsa-miR-21-5p   | CXCL10   | 3627 | ENSG00000169245 | 24889251 | validated |
| mirTarbase | hsa-miR-326     | INPPL1   | 3636 | ENSG00000165458 | 23622248 | validated |
| mirTarbase | hsa-miR-192-5p  | INSIG1   | 3638 | ENSG00000186480 | 19074876 | validated |
| mirTarbase | hsa-miR-106b-5p | INSIG1   | 3638 | ENSG00000186480 | 23622248 | validated |
| mirTarbase | hsa-miR-15b-5p  | INSR     | 3643 | ENSG00000171105 | 26179126 | validated |
| mirTarbase | hsa-miR-21-5p   | IPP      | 3652 | ENSG00000197429 | 18591254 | validated |
| mirTarbase | hsa-miR-222-3p  | IPP      | 3652 | ENSG00000197429 | 23622248 | validated |
| mirTarbase | hsa-miR-106b-5p | IPP      | 3652 | ENSG00000197429 | 23313552 | validated |
| mirTarbase | hsa-miR-192-5p  | IRAK1    | 3654 | ENSG00000184216 | 19074876 | validated |
| mirTarbase | hsa-miR-222-3p  | IRAK1    | 3654 | ENSG00000184216 | 23622248 | validated |
| mirTarbase | hsa-miR-21-5p   | IRAK1    | 3654 | ENSG00000184216 | 23633945 | validated |
| mirTarbase | hsa-miR-15b-5p  | ITGA6    | 3655 | ENSG00000091409 | 23622248 | validated |
| mirTarbase | hsa-miR-21-5p   | IREB2    | 3658 | ENSG00000136381 | 18591254 | validated |
| mirTarbase | hsa-miR-301a-3p | IRF1     | 3659 | ENSG00000125347 | 23824327 | validated |
| mirTarbase | hsa-miR-18a-5p  | IRF2     | 3660 | ENSG00000168310 | 22012620 | validated |
| mirTarbase | hsa-miR-15b-5p  | IRF4     | 3662 | ENSG00000137265 | 22473208 | validated |
| mirTarbase | hsa-miR-144-3p  | IRS1     | 3667 | ENSG00000169047 | 27069535 | validated |
| mirTarbase | hsa-miR-15b-5p  | ITGA2    | 3673 | ENSG00000164171 | 21572407 | validated |
| mirTarbase | hsa-miR-18a-5p  | ITGA2    | 3673 | ENSG00000164171 | 21572407 | validated |
| mirTarbase | hsa-miR-106b-5p | ITGA2    | 3673 | ENSG00000164171 | 22100165 | validated |
| mirTarbase | hsa-miR-192-5p  | ITGA3    | 3675 | ENSG00000005884 | 27292025 | validated |

|            |                 |        |      |                 |          |           |
|------------|-----------------|--------|------|-----------------|----------|-----------|
| mirTarbase | hsa-miR-192-5p  | ITGAV  | 3685 | ENSG00000138448 | 19074876 | validated |
| mirTarbase | hsa-miR-192-5p  | ITGB1  | 3688 | ENSG00000150093 | 19074876 | validated |
| mirTarbase | hsa-miR-106b-5p | ITGB1  | 3688 | ENSG00000150093 | 20371350 | validated |
| mirTarbase | hsa-miR-192-5p  | ITGB3  | 3690 | ENSG00000259207 | 26506238 | validated |
| mirTarbase | hsa-miR-505-3p  | EIF6   | 3692 | ENSG00000242372 | 22012620 | validated |
| mirTarbase | hsa-miR-21-5p   | ITGB8  | 3696 | ENSG00000105855 | 22473208 | validated |
| mirTarbase | hsa-miR-106b-5p | ITPKB  | 3707 | ENSG00000143772 | 22473208 | validated |
| mirTarbase | hsa-miR-15b-5p  | ITPR1  | 3708 | ENSG00000150995 | 22473208 | validated |
| mirTarbase | hsa-miR-106b-5p | JAK1   | 3716 | ENSG00000162434 | 17242205 | validated |
| mirTarbase | hsa-miR-15b-5p  | JAK1   | 3716 | ENSG00000162434 | 23622248 | validated |
| mirTarbase | hsa-miR-15b-5p  | JARID2 | 3720 | ENSG00000008083 | 23446348 | validated |
| mirTarbase | hsa-miR-505-3p  | JARID2 | 3720 | ENSG00000008083 | 22012620 | validated |
| mirTarbase | hsa-miR-301a-3p | JARID2 | 3720 | ENSG00000008083 | 23313552 | validated |
| mirTarbase | hsa-miR-106b-5p | KCNA7  | 3743 | ENSG00000104848 | 23446348 | validated |
| mirTarbase | hsa-miR-106b-5p | KCNB1  | 3745 | ENSG00000158445 | 20371350 | validated |
| mirTarbase | hsa-miR-301a-3p | KCNB1  | 3745 | ENSG00000158445 | 20371350 | validated |
| mirTarbase | hsa-miR-582-5p  | KCNB1  | 3745 | ENSG00000158445 | 23824327 | validated |
| mirTarbase | hsa-miR-582-3p  | KCNC1  | 3746 | ENSG00000129159 | 23295946 | validated |
| mirTarbase | hsa-miR-582-5p  | KCNC1  | 3746 | ENSG00000129159 | 23295946 | validated |
| mirTarbase | hsa-miR-192-5p  | KCNC3  | 3748 | ENSG00000131398 | 23824327 | validated |
| mirTarbase | hsa-miR-106b-5p | KCND3  | 3752 | ENSG00000171385 | 23313552 | validated |
| mirTarbase | hsa-miR-505-3p  | KCNH1  | 3756 | ENSG00000143473 | 19536157 | validated |
| mirTarbase | hsa-miR-212-3p  | KCNJ2  | 3759 | ENSG00000123700 | 22880819 | validated |
| mirTarbase | hsa-miR-106b-5p | KCNJ8  | 3764 | ENSG00000121361 | 22012620 | validated |
| mirTarbase | hsa-miR-106b-5p | KCNMB1 | 3779 | ENSG00000145936 | 23446348 | validated |
| mirTarbase | hsa-miR-192-5p  | KCNS3  | 3790 | ENSG00000170745 | 19074876 | validated |
| mirTarbase | hsa-miR-15b-5p  | KDR    | 3791 | ENSG00000128052 | 23688497 | validated |
| mirTarbase | hsa-miR-296-5p  | KDR    | 3791 | ENSG00000128052 | 26500043 | validated |
| mirTarbase | hsa-miR-192-5p  | KIF5B  | 3799 | ENSG00000170759 | 19074876 | validated |
| mirTarbase | hsa-miR-15b-5p  | KIF5B  | 3799 | ENSG00000170759 | 22473208 | validated |
| mirTarbase | hsa-miR-192-5p  | KIF5C  | 3800 | ENSG00000276734 | 19074876 | validated |
| mirTarbase | hsa-miR-106b-5p | KIF5C  | 3800 | ENSG00000276734 | 23622248 | validated |
| mirTarbase | hsa-miR-222-3p  | KIF5C  | 3800 | ENSG00000276734 | 23622248 | validated |
| mirTarbase | hsa-miR-326     | KLK2   | 3817 | ENSG00000167751 | 23824327 | validated |
| mirTarbase | hsa-miR-21-5p   | KLK2   | 3817 | ENSG00000167751 | 19536157 | validated |
| mirTarbase | hsa-miR-301a-3p | KLRD1  | 3824 | ENSG00000134539 | 19536157 | validated |
| mirTarbase | hsa-miR-106b-5p | KLRD1  | 3824 | ENSG00000134539 | 19536157 | validated |
| mirTarbase | hsa-miR-15b-5p  | KPNA1  | 3836 | ENSG00000114030 | 21572407 | validated |
| mirTarbase | hsa-miR-212-3p  | KPNA1  | 3836 | ENSG00000114030 | 21572407 | validated |
| mirTarbase | hsa-miR-181a-5p | KPNA1  | 3836 | ENSG00000114030 | 22473208 | validated |
| mirTarbase | hsa-miR-222-3p  | KPNB1  | 3837 | ENSG00000108424 | 23622248 | validated |
| mirTarbase | hsa-miR-326     | KPNA2  | 3838 | ENSG00000182481 | 23622248 | validated |
| mirTarbase | hsa-miR-144-3p  | KPNA2  | 3838 | ENSG00000182481 | 23592263 | validated |
| mirTarbase | hsa-miR-106b-5p | KPNA2  | 3838 | ENSG00000182481 | 22473208 | validated |
| mirTarbase | hsa-miR-582-5p  | KPNA2  | 3838 | ENSG00000182481 | 23592263 | validated |
| mirTarbase | hsa-miR-222-3p  | KPNA2  | 3838 | ENSG00000182481 | 23592263 | validated |
| mirTarbase | hsa-miR-15b-5p  | KPNA3  | 3839 | ENSG00000102753 | 21572407 | validated |
| mirTarbase | hsa-miR-192-5p  | KPNA5  | 3841 | ENSG00000196911 | 19074876 | validated |
| mirTarbase | hsa-miR-21-5p   | TNPO1  | 3842 | ENSG00000083312 | 18591254 | validated |
| mirTarbase | hsa-miR-18a-5p  | TNPO1  | 3842 | ENSG00000083312 | 23622248 | validated |
| mirTarbase | hsa-miR-181a-5p | TNPO1  | 3842 | ENSG00000083312 | 23592263 | validated |
| mirTarbase | hsa-miR-144-3p  | TNPO1  | 3842 | ENSG00000083312 | 23592263 | validated |
| mirTarbase | hsa-miR-505-3p  | TNPO1  | 3842 | ENSG00000083312 | 23313552 | validated |
| mirTarbase | hsa-miR-222-3p  | IPO5   | 3843 | ENSG00000065150 | 23622248 | validated |
| mirTarbase | hsa-miR-181a-5p | IPO5   | 3843 | ENSG00000065150 | 22473208 | validated |
| mirTarbase | hsa-miR-181a-5p | KRAS   | 3845 | ENSG00000133703 | 20371350 | validated |
| mirTarbase | hsa-miR-326     | KRAS   | 3845 | ENSG00000133703 | 24398324 | validated |
| mirTarbase | hsa-miR-106b-5p | KRT10  | 3858 | ENSG00000186395 | 23592263 | validated |
| mirTarbase | hsa-miR-15b-5p  | KRT33B | 3884 | ENSG00000263012 | 20371350 | validated |
| mirTarbase | hsa-miR-181a-5p | LAMA3  | 3909 | ENSG00000053747 | 23622248 | validated |
| mirTarbase | hsa-miR-106b-5p | LAMC1  | 3915 | ENSG00000135862 | 22473208 | validated |
| mirTarbase | hsa-miR-15b-5p  | LAMC1  | 3915 | ENSG00000135862 | 23592263 | validated |
| mirTarbase | hsa-miR-21-5p   | LAMP2  | 3920 | ENSG00000005893 | 18591254 | validated |
| mirTarbase | hsa-miR-15b-5p  | LAMP2  | 3920 | ENSG00000005893 | 23446348 | validated |
| mirTarbase | hsa-miR-222-3p  | STMN1  | 3925 | ENSG00000117632 | 23446348 | validated |
| mirTarbase | hsa-miR-106b-5p | LASP1  | 3927 | ENSG00000002834 | 22473208 | validated |
| mirTarbase | hsa-miR-181a-5p | LBR    | 3930 | ENSG00000143815 | 20371350 | validated |
| mirTarbase | hsa-miR-106b-5p | LDLR   | 3949 | ENSG00000130164 | 22473208 | validated |
| mirTarbase | hsa-miR-301a-3p | LDLR   | 3949 | ENSG00000130164 | 22012620 | validated |
| mirTarbase | hsa-miR-181a-5p | LDLR   | 3949 | ENSG00000130164 | 23313552 | validated |
| mirTarbase | hsa-miR-212-3p  | LDLR   | 3949 | ENSG00000130164 | 21572407 | validated |

|            |                 |          |      |                 |          |           |
|------------|-----------------|----------|------|-----------------|----------|-----------|
| mirtarbase | hsa-miR-181a-5p | LFNG     | 3955 | ENSG00000106003 | 17612493 | validated |
| mirtarbase | hsa-miR-222-3p  | LGALS3BP | 3959 | ENSG00000108679 | 23622248 | validated |
| mirtarbase | hsa-miR-505-3p  | LGALS8   | 3964 | ENSG00000116977 | 28735896 | validated |
| mirtarbase | hsa-miR-21-5p   | LIFR     | 3977 | ENSG00000113594 | 18591254 | validated |
| mirtarbase | hsa-miR-212-3p  | LIFR     | 3977 | ENSG00000113594 | 21572407 | validated |
| mirtarbase | hsa-miR-144-3p  | LIFR     | 3977 | ENSG00000113594 | 21572407 | validated |
| mirtarbase | hsa-miR-222-3p  | ABLIM1   | 3983 | ENSG00000099204 | 22100165 | validated |
| mirtarbase | hsa-miR-106b-5p | LIMK1    | 3984 | ENSG00000106683 | 17242205 | validated |
| mirtarbase | hsa-miR-192-5p  | LIMS1    | 3987 | ENSG00000169756 | 19074876 | validated |
| mirtarbase | hsa-miR-505-3p  | LIMS1    | 3987 | ENSG00000169756 | 23622248 | validated |
| mirtarbase | hsa-miR-192-5p  | LIPA     | 3988 | ENSG00000107798 | 19074876 | validated |
| mirtarbase | hsa-miR-301a-3p | LIPA     | 3988 | ENSG00000107798 | 21572407 | validated |
| mirtarbase | hsa-miR-192-5p  | FADS1    | 3992 | ENSG00000149485 | 19074876 | validated |
| mirtarbase | hsa-miR-192-5p  | LMAN1    | 3998 | ENSG00000074695 | 19074876 | validated |
| mirtarbase | hsa-miR-181a-5p | LMAN1    | 3998 | ENSG00000074695 | 22473208 | validated |
| mirtarbase | hsa-miR-192-5p  | LMNB1    | 4001 | ENSG00000113368 | 19074876 | validated |
| mirtarbase | hsa-miR-192-5p  | LOXL2    | 4017 | ENSG00000134013 | 16822819 | validated |
| mirtarbase | hsa-miR-21-5p   | LRP6     | 4040 | ENSG00000070018 | 28337300 | validated |
| mirtarbase | hsa-miR-106b-5p | LRPAP1   | 4043 | ENSG00000163956 | 20371350 | validated |
| mirtarbase | hsa-miR-15b-5p  | CD180    | 4064 | ENSG00000134061 | 22291592 | validated |
| mirtarbase | hsa-miR-582-5p  | CD180    | 4064 | ENSG00000134061 | 26701625 | validated |
| mirtarbase | hsa-miR-222-3p  | LYN      | 4067 | ENSG00000254087 | 23622248 | validated |
| mirtarbase | hsa-miR-15b-5p  | TM4SF1   | 4071 | ENSG00000169908 | 23592263 | validated |
| mirtarbase | hsa-miR-106b-5p | M6PR     | 4074 | ENSG00000003056 | 22473208 | validated |
| mirtarbase | hsa-miR-21-5p   | CAPRIN1  | 4076 | ENSG00000135387 | 18591254 | validated |
| mirtarbase | hsa-miR-222-3p  | CAPRIN1  | 4076 | ENSG00000135387 | 23622248 | validated |
| mirtarbase | hsa-miR-15b-5p  | MARCKS   | 4082 | ENSG00000277443 | 23622248 | validated |
| mirtarbase | hsa-miR-192-5p  | MAD2L1   | 4085 | ENSG00000164109 | 19074876 | validated |
| mirtarbase | hsa-miR-181a-5p | SMAD2    | 4087 | ENSG00000175387 | 22942087 | validated |
| mirtarbase | hsa-miR-18a-5p  | SMAD2    | 4087 | ENSG00000175387 | 24664294 | validated |
| mirtarbase | hsa-miR-505-3p  | SMAD2    | 4087 | ENSG00000175387 | 23313552 | validated |
| mirtarbase | hsa-miR-15b-5p  | SMAD2    | 4087 | ENSG00000175387 | 27499071 | validated |
| mirtarbase | hsa-miR-212-3p  | SMAD2    | 4087 | ENSG00000175387 | 25988335 | validated |
| mirtarbase | hsa-miR-18a-5p  | SMAD3    | 4088 | ENSG00000166949 | 23249750 | validated |
| mirtarbase | hsa-miR-15b-5p  | SMAD3    | 4088 | ENSG00000166949 | 22473208 | validated |
| mirtarbase | hsa-miR-18a-5p  | SMAD4    | 4089 | ENSG00000141646 | 20940405 | validated |
| mirtarbase | hsa-miR-301a-3p | SMAD4    | 4089 | ENSG00000141646 | 23393589 | validated |
| mirtarbase | hsa-miR-106b-5p | SMAD4    | 4089 | ENSG00000141646 | 23446348 | validated |
| mirtarbase | hsa-miR-144-3p  | SMAD4    | 4089 | ENSG00000141646 | 26918315 | validated |
| mirtarbase | hsa-miR-106b-5p | SMAD5    | 4090 | ENSG00000113658 | 22473208 | validated |
| mirtarbase | hsa-miR-222-3p  | SMAD5    | 4090 | ENSG00000113658 | 26809090 | validated |
| mirtarbase | hsa-miR-106b-5p | SMAD6    | 4091 | ENSG00000137834 | 22473208 | validated |
| mirtarbase | hsa-miR-21-5p   | SMAD7    | 4092 | ENSG00000101665 | 23292313 | validated |
| mirtarbase | hsa-miR-15b-5p  | SMAD7    | 4092 | ENSG00000101665 | 23622248 | validated |
| mirtarbase | hsa-miR-106b-5p | SMAD7    | 4092 | ENSG00000101665 | 22286770 | validated |
| mirtarbase | hsa-miR-106b-5p | SMAD9    | 4093 | ENSG00000120693 | 17242205 | validated |
| mirtarbase | hsa-miR-326     | MAGEB4   | 4115 | ENSG00000120289 | 23824327 | validated |
| mirtarbase | hsa-miR-192-5p  | MAN2A2   | 4122 | ENSG00000196547 | 19074876 | validated |
| mirtarbase | hsa-miR-222-3p  | MAP1B    | 4131 | ENSG00000131711 | 23622248 | validated |
| mirtarbase | hsa-miR-222-3p  | MARS1    | 4141 | ENSG00000166986 | 23622248 | validated |
| mirtarbase | hsa-miR-326     | MAT2A    | 4144 | ENSG00000168906 | 23622248 | validated |
| mirtarbase | hsa-miR-106b-5p | MAT2A    | 4144 | ENSG00000168906 | 23622248 | validated |
| mirtarbase | hsa-miR-222-3p  | MAT2A    | 4144 | ENSG00000168906 | 23592263 | validated |
| mirtarbase | hsa-miR-326     | MAZ      | 4150 | ENSG00000103495 | 23622248 | validated |
| mirtarbase | hsa-miR-222-3p  | MAZ      | 4150 | ENSG00000103495 | 23622248 | validated |
| mirtarbase | hsa-miR-181a-5p | MAZ      | 4150 | ENSG00000103495 | 23622248 | validated |
| mirtarbase | hsa-miR-505-3p  | MAZ      | 4150 | ENSG00000103495 | 19536157 | validated |
| mirtarbase | hsa-miR-18a-5p  | MBD1     | 4152 | ENSG00000141644 | 23313552 | validated |
| mirtarbase | hsa-miR-21-5p   | MBNL1    | 4154 | ENSG00000152601 | 20371350 | validated |
| mirtarbase | hsa-miR-301a-3p | MBNL1    | 4154 | ENSG00000152601 | 22012620 | validated |
| mirtarbase | hsa-miR-144-3p  | MBNL1    | 4154 | ENSG00000152601 | 20371350 | validated |
| mirtarbase | hsa-miR-192-5p  | MCAM     | 4162 | ENSG00000076706 | 19074876 | validated |
| mirtarbase | hsa-miR-106b-5p | MCC      | 4163 | ENSG00000171444 | 21572407 | validated |
| mirtarbase | hsa-miR-301a-3p | MCC      | 4163 | ENSG00000171444 | 21572407 | validated |
| mirtarbase | hsa-miR-582-5p  | MCL1     | 4170 | ENSG00000143384 | 20829195 | validated |
| mirtarbase | hsa-miR-181a-5p | MCL1     | 4170 | ENSG00000143384 | 22610076 | validated |
| mirtarbase | hsa-miR-106b-5p | MCL1     | 4170 | ENSG00000143384 | 22473208 | validated |
| mirtarbase | hsa-miR-144-3p  | MCL1     | 4170 | ENSG00000143384 | 23592263 | validated |
| mirtarbase | hsa-miR-192-5p  | MCM3     | 4172 | ENSG00000112118 | 19074876 | validated |
| mirtarbase | hsa-miR-222-3p  | MCM3     | 4172 | ENSG00000112118 | 23622248 | validated |
| mirtarbase | hsa-miR-18a-5p  | MCM5     | 4174 | ENSG00000100297 | 23622248 | validated |

|            |                 |         |      |                 |          |           |
|------------|-----------------|---------|------|-----------------|----------|-----------|
| mirTarbase | hsa-miR-192-5p  | MCM6    | 4175 | ENSG00000076003 | 19074876 | validated |
| mirTarbase | hsa-miR-222-3p  | MCM7    | 4176 | ENSG00000166508 | 23622248 | validated |
| mirTarbase | hsa-miR-181a-5p | CD46    | 4179 | ENSG00000117335 | 17612493 | validated |
| mirTarbase | hsa-miR-192-5p  | DNAJB9  | 4189 | ENSG00000128590 | 19074876 | validated |
| mirTarbase | hsa-miR-505-3p  | DNAJB9  | 4189 | ENSG00000128590 | 23622248 | validated |
| mirTarbase | hsa-miR-106b-5p | DNAJB9  | 4189 | ENSG00000128590 | 24398324 | validated |
| mirTarbase | hsa-miR-15b-5p  | MDH1    | 4190 | ENSG00000014641 | 23622248 | validated |
| mirTarbase | hsa-miR-222-3p  | MDH2    | 4191 | ENSG00000146701 | 23622248 | validated |
| mirTarbase | hsa-miR-222-3p  | MDM2    | 4193 | ENSG00000135679 | 23592263 | validated |
| mirTarbase | hsa-miR-106b-5p | MDM2    | 4193 | ENSG00000135679 | 23446348 | validated |
| mirTarbase | hsa-miR-192-5p  | MDM4    | 4194 | ENSG00000198625 | 19074876 | validated |
| mirTarbase | hsa-miR-21-5p   | MDM4    | 4194 | ENSG00000198625 | 18591254 | validated |
| mirTarbase | hsa-miR-222-3p  | MEA1    | 4201 | ENSG00000124733 | 23622248 | validated |
| mirTarbase | hsa-miR-212-3p  | MECP2   | 4204 | ENSG00000169057 | 20020497 | validated |
| mirTarbase | hsa-miR-106b-5p | MECP2   | 4204 | ENSG00000169057 | 22473208 | validated |
| mirTarbase | hsa-miR-21-5p   | MEF2A   | 4205 | ENSG00000068305 | 18591254 | validated |
| mirTarbase | hsa-miR-21-5p   | MEF2C   | 4208 | ENSG00000081189 | 21170291 | validated |
| mirTarbase | hsa-miR-18a-5p  | MEF2D   | 4209 | ENSG00000116604 | 26356851 | validated |
| mirTarbase | hsa-miR-21-5p   | MEIS1   | 4211 | ENSG00000143995 | 18591254 | validated |
| mirTarbase | hsa-miR-192-5p  | MEIS2   | 4212 | ENSG00000134138 | 19074876 | validated |
| mirTarbase | hsa-miR-192-5p  | MAP3K1  | 4214 | ENSG00000095015 | 16822819 | validated |
| mirTarbase | hsa-miR-21-5p   | MAP3K1  | 4214 | ENSG00000095015 | 18591254 | validated |
| mirTarbase | hsa-miR-181a-5p | MAP3K3  | 4215 | ENSG00000198909 | 22942087 | validated |
| mirTarbase | hsa-miR-106b-5p | MAP3K3  | 4215 | ENSG00000198909 | 22473208 | validated |
| mirTarbase | hsa-miR-144-3p  | MAP3K4  | 4216 | ENSG00000085511 | 23592263 | validated |
| mirTarbase | hsa-miR-301a-3p | MAP3K5  | 4217 | ENSG00000197442 | 27775615 | validated |
| mirTarbase | hsa-miR-301a-3p | MEOX2   | 4223 | ENSG00000106511 | 20470754 | validated |
| mirTarbase | hsa-miR-144-3p  | MET     | 4233 | ENSG00000105976 | 25927670 | validated |
| mirTarbase | hsa-miR-192-5p  | MELTF   | 4241 | ENSG00000163975 | 19074876 | validated |
| mirTarbase | hsa-miR-181a-5p | MGAT5   | 4249 | ENSG00000152127 | 23622248 | validated |
| mirTarbase | hsa-miR-222-3p  | KITLG   | 4254 | ENSG00000049130 | 23622248 | validated |
| mirTarbase | hsa-miR-222-3p  | MGMT    | 4255 | ENSG00000170430 | 24147153 | validated |
| mirTarbase | hsa-miR-106b-5p | MICB    | 4277 | ENSG00000234218 | 22473208 | validated |
| mirTarbase | hsa-miR-18a-5p  | MID1    | 4281 | ENSG00000101871 | 20371350 | validated |
| mirTarbase | hsa-miR-192-5p  | MKI67   | 4288 | ENSG00000148773 | 19074876 | validated |
| mirTarbase | hsa-miR-505-3p  | MKI67   | 4288 | ENSG00000148773 | 23622248 | validated |
| mirTarbase | hsa-miR-144-3p  | MKLN1   | 4289 | ENSG00000128585 | 23592263 | validated |
| mirTarbase | hsa-miR-301a-3p | MAP3K9  | 4293 | ENSG00000006432 | 23592263 | validated |
| mirTarbase | hsa-miR-181a-5p | MAP3K10 | 4294 | ENSG00000130758 | 22942087 | validated |
| mirTarbase | hsa-miR-192-5p  | KMT2A   | 4297 | ENSG00000118058 | 23313552 | validated |
| mirTarbase | hsa-miR-106b-5p | MLLT1   | 4298 | ENSG00000130382 | 23592263 | validated |
| mirTarbase | hsa-miR-106b-5p | AFF1    | 4299 | ENSG00000172493 | 22473208 | validated |
| mirTarbase | hsa-miR-15b-5p  | AFDN    | 4301 | ENSG00000130396 | 23622248 | validated |
| mirTarbase | hsa-miR-15b-5p  | MLLT6   | 4302 | ENSG00000275023 | 22473208 | validated |
| mirTarbase | hsa-miR-21-5p   | MMP2    | 4313 | ENSG00000087245 | 19435867 | validated |
| mirTarbase | hsa-miR-106b-5p | MMP2    | 4313 | ENSG00000087245 | 24164962 | validated |
| mirTarbase | hsa-miR-21-5p   | MMP9    | 4318 | ENSG00000100985 | 19435867 | validated |
| mirTarbase | hsa-miR-15b-5p  | MMP9    | 4318 | ENSG00000100985 | 25901555 | validated |
| mirTarbase | hsa-miR-181a-5p | MMP14   | 4323 | ENSG00000157227 | 22942087 | validated |
| mirTarbase | hsa-miR-301a-3p | MOCS2   | 4338 | ENSG00000164172 | 19536157 | validated |
| mirTarbase | hsa-miR-15b-5p  | MPP1    | 4354 | ENSG00000130830 | 23622248 | validated |
| mirTarbase | hsa-miR-582-3p  | MPP2    | 4355 | ENSG00000108852 | 26701625 | validated |
| mirTarbase | hsa-miR-21-5p   | MSH2    | 4436 | ENSG00000095002 | 21078976 | validated |
| mirTarbase | hsa-miR-326     | MSH3    | 4437 | ENSG00000113318 | 19883630 | validated |
| mirTarbase | hsa-miR-106b-5p | MSH3    | 4437 | ENSG00000113318 | 23313552 | validated |
| mirTarbase | hsa-miR-192-5p  | MSN     | 4478 | ENSG00000147065 | 16822819 | validated |
| mirTarbase | hsa-miR-144-3p  | MSN     | 4478 | ENSG00000147065 | 26701625 | validated |
| mirTarbase | hsa-miR-192-5p  | MT1F    | 4494 | ENSG00000198417 | 19074876 | validated |
| mirTarbase | hsa-miR-192-5p  | MT1X    | 4501 | ENSG00000187193 | 19074876 | validated |
| mirTarbase | hsa-miR-21-5p   | MT-CO2  | 4513 | ENSG00000198712 | 26604791 | validated |
| mirTarbase | hsa-miR-106b-5p | MTF1    | 4520 | ENSG00000188786 | 22473208 | validated |
| mirTarbase | hsa-miR-106b-5p | MTHFD1  | 4522 | ENSG00000100714 | 23622248 | validated |
| mirTarbase | hsa-miR-15b-5p  | MTHFR   | 4524 | ENSG00000177000 | 21572407 | validated |
| mirTarbase | hsa-miR-181a-5p | MT-ND2  | 4536 | ENSG00000198763 | 23622248 | validated |
| mirTarbase | hsa-miR-106b-5p | MYO1F   | 4542 | ENSG00000142347 | 23313552 | validated |
| mirTarbase | hsa-miR-106b-5p | MTR     | 4548 | ENSG00000116984 | 23622248 | validated |
| mirTarbase | hsa-miR-21-5p   | MUC1    | 4582 | ENSG00000185499 | 18591254 | validated |
| mirTarbase | hsa-miR-106b-5p | TRIM37  | 4591 | ENSG00000108395 | 24398324 | validated |
| mirTarbase | hsa-miR-301a-3p | TRIM37  | 4591 | ENSG00000108395 | 24398324 | validated |
| mirTarbase | hsa-miR-106b-5p | MXI1    | 4601 | ENSG00000119950 | 17242205 | validated |
| mirTarbase | hsa-miR-192-5p  | MXI1    | 4601 | ENSG00000119950 | 19074876 | validated |

|            |                 |          |      |                 |          |           |
|------------|-----------------|----------|------|-----------------|----------|-----------|
| mirtarbase | hsa-miR-192-5p  | MYB      | 4602 | ENSG00000118513 | 19074876 | validated |
| mirtarbase | hsa-miR-505-3p  | MYBPC1   | 4604 | ENSG00000196091 | 23824327 | validated |
| mirtarbase | hsa-miR-505-3p  | MYBL2    | 4605 | ENSG00000101057 | 23622248 | validated |
| mirtarbase | hsa-miR-21-5p   | MYC      | 4609 | ENSG00000136997 | 19528081 | validated |
| mirtarbase | hsa-miR-212-3p  | MYC      | 4609 | ENSG00000136997 | 21053104 | validated |
| mirtarbase | hsa-miR-106b-5p | MYC      | 4609 | ENSG00000136997 | 24955218 | validated |
| mirtarbase | hsa-miR-222-3p  | MYC      | 4609 | ENSG00000136997 | 24510096 | validated |
| mirtarbase | hsa-miR-582-5p  | MYCN     | 4613 | ENSG00000134323 | 22012620 | validated |
| mirtarbase | hsa-miR-144-3p  | MYCN     | 4613 | ENSG00000134323 | 22012620 | validated |
| mirtarbase | hsa-miR-21-5p   | MYD88    | 4615 | ENSG00000172936 | 23633945 | validated |
| mirtarbase | hsa-miR-106b-5p | MYH9     | 4627 | ENSG00000100345 | 24906430 | validated |
| mirtarbase | hsa-miR-505-3p  | MYH10    | 4628 | ENSG00000133026 | 23622248 | validated |
| mirtarbase | hsa-miR-301a-3p | MYH11    | 4629 | ENSG00000276480 | 23824327 | validated |
| mirtarbase | hsa-miR-106b-5p | MYL6     | 4637 | ENSG00000092841 | 23622248 | validated |
| mirtarbase | hsa-miR-18a-5p  | MYLK     | 4638 | ENSG00000065534 | 26233958 | validated |
| mirtarbase | hsa-miR-582-3p  | MYO1C    | 4641 | ENSG00000197879 | 23592263 | validated |
| mirtarbase | hsa-miR-106b-5p | MYO1D    | 4642 | ENSG00000176658 | 23592263 | validated |
| mirtarbase | hsa-miR-144-3p  | MYO5A    | 4644 | ENSG00000197535 | 23446348 | validated |
| mirtarbase | hsa-miR-15b-5p  | MYO5A    | 4644 | ENSG00000197535 | 22473208 | validated |
| mirtarbase | hsa-miR-21-5p   | MYO9A    | 4649 | ENSG00000066933 | 18591254 | validated |
| mirtarbase | hsa-miR-192-5p  | PPP1R12A | 4659 | ENSG00000058272 | 19074876 | validated |
| mirtarbase | hsa-miR-106b-5p | PPP1R12B | 4660 | ENSG00000077157 | 22473208 | validated |
| mirtarbase | hsa-miR-192-5p  | NAB1     | 4664 | ENSG00000138386 | 19074876 | validated |
| mirtarbase | hsa-miR-15b-5p  | NAB1     | 4664 | ENSG00000138386 | 23622248 | validated |
| mirtarbase | hsa-miR-15b-5p  | HNRNPM   | 4670 | ENSG00000099783 | 23622248 | validated |
| mirtarbase | hsa-miR-582-5p  | NAP1L1   | 4673 | ENSG00000187109 | 20371350 | validated |
| mirtarbase | hsa-miR-222-3p  | NARS1    | 4677 | ENSG00000134440 | 23622248 | validated |
| mirtarbase | hsa-miR-106b-5p | NARS1    | 4677 | ENSG00000134440 | 23446348 | validated |
| mirtarbase | hsa-miR-301a-3p | NARS1    | 4677 | ENSG00000134440 | 23824327 | validated |
| mirtarbase | hsa-miR-106b-5p | NBL1     | 4681 | ENSG00000158747 | 26701625 | validated |
| mirtarbase | hsa-miR-106b-5p | NUBP1    | 4682 | ENSG00000103274 | 17242205 | validated |
| mirtarbase | hsa-miR-192-5p  | NBN      | 4683 | ENSG00000104320 | 19074876 | validated |
| mirtarbase | hsa-miR-192-5p  | NCBP1    | 4686 | ENSG00000136937 | 19074876 | validated |
| mirtarbase | hsa-miR-15b-5p  | SEPTIN2  | 4735 | ENSG00000168385 | 23622248 | validated |
| mirtarbase | hsa-miR-181a-5p | SEPTIN2  | 4735 | ENSG00000168385 | 23446348 | validated |
| mirtarbase | hsa-miR-106b-5p | SEPTIN2  | 4735 | ENSG00000168385 | 22473208 | validated |
| mirtarbase | hsa-miR-21-5p   | SEPTIN2  | 4735 | ENSG00000168385 | 22473208 | validated |
| mirtarbase | hsa-miR-18a-5p  | NEDD9    | 4739 | ENSG00000111859 | 22308110 | validated |
| mirtarbase | hsa-miR-106b-5p | NEFH     | 4744 | ENSG00000100285 | 17242205 | validated |
| mirtarbase | hsa-miR-192-5p  | NEK1     | 4750 | ENSG00000137601 | 19074876 | validated |
| mirtarbase | hsa-miR-21-5p   | NEK1     | 4750 | ENSG00000137601 | 18591254 | validated |
| mirtarbase | hsa-miR-18a-5p  | NEO1     | 4756 | ENSG00000067141 | 24657544 | validated |
| mirtarbase | hsa-miR-301a-3p | NF2      | 4771 | ENSG00000186575 | 23824327 | validated |
| mirtarbase | hsa-miR-326     | NF2      | 4771 | ENSG00000186575 | 26701625 | validated |
| mirtarbase | hsa-miR-21-5p   | NFIA     | 4774 | ENSG00000162599 | 24980967 | validated |
| mirtarbase | hsa-miR-301a-3p | NFE2L1   | 4779 | ENSG00000082641 | 23824327 | validated |
| mirtarbase | hsa-miR-144-3p  | NFE2L2   | 4780 | ENSG00000116044 | 23236440 | validated |
| mirtarbase | hsa-miR-192-5p  | NFIB     | 4781 | ENSG00000147862 | 19074876 | validated |
| mirtarbase | hsa-miR-301a-3p | NFIB     | 4781 | ENSG00000147862 | 23592263 | validated |
| mirtarbase | hsa-miR-106b-5p | NFIB     | 4781 | ENSG00000147862 | 23592263 | validated |
| mirtarbase | hsa-miR-15b-5p  | NFIC     | 4782 | ENSG00000141905 | 23592263 | validated |
| mirtarbase | hsa-miR-296-5p  | NFIC     | 4782 | ENSG00000141905 | 20371350 | validated |
| mirtarbase | hsa-miR-296-5p  | NFIX     | 4784 | ENSG00000008441 | 27292025 | validated |
| mirtarbase | hsa-miR-21-5p   | NFKB1    | 4790 | ENSG00000109320 | 21081469 | validated |
| mirtarbase | hsa-miR-192-5p  | NFYA     | 4800 | ENSG00000001167 | 19074876 | validated |
| mirtarbase | hsa-miR-181a-5p | NFYB     | 4801 | ENSG00000120837 | 20371350 | validated |
| mirtarbase | hsa-miR-296-5p  | NGFR     | 4804 | ENSG00000064300 | 27927008 | validated |
| mirtarbase | hsa-miR-106b-5p | NID1     | 4811 | ENSG00000116962 | 23622248 | validated |
| mirtarbase | hsa-miR-192-5p  | NID1     | 4811 | ENSG00000116962 | 25857602 | validated |
| mirtarbase | hsa-miR-21-5p   | NKTR     | 4820 | ENSG00000114857 | 20371350 | validated |
| mirtarbase | hsa-miR-192-5p  | NKX3-1   | 4824 | ENSG00000167034 | 19074876 | validated |
| mirtarbase | hsa-miR-301a-3p | CNOT4    | 4850 | ENSG00000080802 | 23592263 | validated |
| mirtarbase | hsa-miR-106b-5p | CNOT4    | 4850 | ENSG00000080802 | 23592263 | validated |
| mirtarbase | hsa-miR-326     | NOTCH1   | 4851 | ENSG00000148400 | 19955368 | validated |
| mirtarbase | hsa-miR-144-3p  | NOTCH1   | 4851 | ENSG00000148400 | 21285251 | validated |
| mirtarbase | hsa-miR-181a-5p | NOTCH1   | 4851 | ENSG00000148400 | 22916024 | validated |
| mirtarbase | hsa-miR-296-5p  | NOTCH1   | 4851 | ENSG00000148400 | 26500043 | validated |
| mirtarbase | hsa-miR-326     | NOTCH2   | 4853 | ENSG00000134250 | 19955368 | validated |
| mirtarbase | hsa-miR-181a-5p | NOTCH2   | 4853 | ENSG00000134250 | 20371350 | validated |
| mirtarbase | hsa-miR-15b-5p  | NOTCH2   | 4853 | ENSG00000134250 | 22473208 | validated |
| mirtarbase | hsa-miR-106b-5p | NPAT     | 4863 | ENSG00000149308 | 22473208 | validated |

|            |                 |           |      |                 |          |           |
|------------|-----------------|-----------|------|-----------------|----------|-----------|
| mirtarbase | hsa-miR-15b-5p  | NPM1      | 4869 | ENSG00000181163 | 23622248 | validated |
| mirtarbase | hsa-miR-144-3p  | NPM1      | 4869 | ENSG00000181163 | 26701625 | validated |
| mirtarbase | hsa-miR-301a-3p | NPTX1     | 4884 | ENSG00000171246 | 20371350 | validated |
| mirtarbase | hsa-miR-505-3p  | NPTX1     | 4884 | ENSG00000171246 | 23824327 | validated |
| mirtarbase | hsa-miR-582-5p  | SLC11A2   | 4891 | ENSG00000110911 | 23592263 | validated |
| mirtarbase | hsa-miR-181a-5p | NRAS      | 4893 | ENSG00000213281 | 27517749 | validated |
| mirtarbase | hsa-miR-106b-5p | YBX1      | 4904 | ENSG00000065978 | 23622248 | validated |
| mirtarbase | hsa-miR-192-5p  | NSF       | 4905 | ENSG00000276262 | 19074876 | validated |
| mirtarbase | hsa-miR-21-5p   | NTF3      | 4908 | ENSG00000185652 | 22019057 | validated |
| mirtarbase | hsa-miR-21-5p   | DDR2      | 4921 | ENSG00000162733 | 18591254 | validated |
| mirtarbase | hsa-miR-192-5p  | NUCB2     | 4925 | ENSG00000070081 | 19074876 | validated |
| mirtarbase | hsa-miR-106b-5p | NUP98     | 4928 | ENSG00000110713 | 22473208 | validated |
| mirtarbase | hsa-miR-326     | NUP98     | 4928 | ENSG00000110713 | 19536157 | validated |
| mirtarbase | hsa-miR-222-3p  | OAZ2      | 4947 | ENSG00000180304 | 23622248 | validated |
| mirtarbase | hsa-miR-181a-5p | OCA2      | 4948 | ENSG00000104044 | 23622248 | validated |
| mirtarbase | hsa-miR-106b-5p | OCRL      | 4952 | ENSG00000122126 | 22473208 | validated |
| mirtarbase | hsa-miR-15b-5p  | OCRL      | 4952 | ENSG00000122126 | 23313552 | validated |
| mirtarbase | hsa-miR-192-5p  | ODC1      | 4953 | ENSG00000115758 | 16822819 | validated |
| mirtarbase | hsa-miR-301a-3p | OMD       | 4958 | ENSG00000127083 | 23824327 | validated |
| mirtarbase | hsa-miR-21-5p   | OLR1      | 4973 | ENSG00000173391 | 18591254 | validated |
| mirtarbase | hsa-miR-192-5p  | OPA1      | 4976 | ENSG00000198836 | 19074876 | validated |
| mirtarbase | hsa-miR-21-5p   | TNFRSF11B | 4982 | ENSG00000164761 | 20371350 | validated |
| mirtarbase | hsa-miR-181a-5p | TNFRSF11B | 4982 | ENSG00000164761 | 22942087 | validated |
| mirtarbase | hsa-miR-106b-5p | OPRK1     | 4986 | ENSG00000082556 | 17242205 | validated |
| mirtarbase | hsa-miR-181a-5p | SIX6      | 4990 | ENSG00000184302 | 17612493 | validated |
| mirtarbase | hsa-miR-192-5p  | ORC1      | 4998 | ENSG00000085840 | 19074876 | validated |
| mirtarbase | hsa-miR-301a-3p | ORC1      | 4998 | ENSG00000085840 | 27292025 | validated |
| mirtarbase | hsa-miR-505-3p  | ORC2      | 4999 | ENSG00000115942 | 23622248 | validated |
| mirtarbase | hsa-miR-15b-5p  | ORC4      | 5000 | ENSG00000115947 | 24398324 | validated |
| mirtarbase | hsa-miR-21-5p   | ORC4      | 5000 | ENSG00000115947 | 22012620 | validated |
| mirtarbase | hsa-miR-192-5p  | ORC4      | 5000 | ENSG00000115947 | 23824327 | validated |
| mirtarbase | hsa-miR-505-3p  | OSBP      | 5007 | ENSG00000110048 | 23622248 | validated |
| mirtarbase | hsa-miR-301a-3p | OSBP      | 5007 | ENSG00000110048 | 23592263 | validated |
| mirtarbase | hsa-miR-181a-5p | OTX2      | 5015 | ENSG00000165588 | 17612493 | validated |
| mirtarbase | hsa-miR-192-5p  | OVOL1     | 5017 | ENSG00000172818 | 19074876 | validated |
| mirtarbase | hsa-miR-21-5p   | OXTR      | 5021 | ENSG00000180914 | 26273428 | validated |
| mirtarbase | hsa-miR-222-3p  | PEBP1     | 5037 | ENSG00000089220 | 23622248 | validated |
| mirtarbase | hsa-miR-181a-5p | PEBP1     | 5037 | ENSG00000089220 | 22473208 | validated |
| mirtarbase | hsa-miR-15b-5p  | FURIN     | 5045 | ENSG00000140564 | 23592263 | validated |
| mirtarbase | hsa-miR-192-5p  | PAFAH1B1  | 5048 | ENSG00000007168 | 19074876 | validated |
| mirtarbase | hsa-miR-18a-5p  | PAFAH1B1  | 5048 | ENSG00000007168 | 20371350 | validated |
| mirtarbase | hsa-miR-106b-5p | PAFAH1B1  | 5048 | ENSG00000007168 | 22473208 | validated |
| mirtarbase | hsa-miR-15b-5p  | PAFAH1B1  | 5048 | ENSG00000007168 | 22473208 | validated |
| mirtarbase | hsa-miR-15b-5p  | PAFAH1B2  | 5049 | ENSG00000168092 | 20371350 | validated |
| mirtarbase | hsa-miR-301a-3p | PAFAH1B2  | 5049 | ENSG00000168092 | 22012620 | validated |
| mirtarbase | hsa-miR-222-3p  | PAFAH1B2  | 5049 | ENSG00000168092 | 21572407 | validated |
| mirtarbase | hsa-miR-301a-3p | SERPINE1  | 5054 | ENSG00000106366 | 21175428 | validated |
| mirtarbase | hsa-miR-192-5p  | SERPINE1  | 5054 | ENSG00000106366 | 27216198 | validated |
| mirtarbase | hsa-miR-15b-5p  | PAK2      | 5062 | ENSG00000180370 | 21572407 | validated |
| mirtarbase | hsa-miR-582-5p  | PAK3      | 5063 | ENSG00000077264 | 23824327 | validated |
| mirtarbase | hsa-miR-181a-5p | PRKN      | 5071 | ENSG00000185345 | 27281615 | validated |
| mirtarbase | hsa-miR-192-5p  | PARN      | 5073 | ENSG00000274829 | 19074876 | validated |
| mirtarbase | hsa-miR-192-5p  | PAWR      | 5074 | ENSG00000177425 | 19074876 | validated |
| mirtarbase | hsa-miR-21-5p   | PBX1      | 5087 | ENSG00000185630 | 18591254 | validated |
| mirtarbase | hsa-miR-326     | PBX2      | 5089 | ENSG00000224952 | 23622248 | validated |
| mirtarbase | hsa-miR-222-3p  | PBX2      | 5089 | ENSG00000224952 | 23622248 | validated |
| mirtarbase | hsa-miR-181a-5p | PBX3      | 5090 | ENSG00000167081 | 22251480 | validated |
| mirtarbase | hsa-miR-144-3p  | PBX3      | 5090 | ENSG00000167081 | 28111340 | validated |
| mirtarbase | hsa-miR-21-5p   | PCBP1     | 5093 | ENSG00000169564 | 19253296 | validated |
| mirtarbase | hsa-miR-222-3p  | PCBP2     | 5094 | ENSG00000197111 | 23622248 | validated |
| mirtarbase | hsa-miR-106b-5p | PCBP2     | 5094 | ENSG00000197111 | 23446348 | validated |
| mirtarbase | hsa-miR-582-5p  | PCCB      | 5096 | ENSG00000114054 | 20371350 | validated |
| mirtarbase | hsa-miR-144-3p  | PCCB      | 5096 | ENSG00000114054 | 20371350 | validated |
| mirtarbase | hsa-miR-192-5p  | PCDH7     | 5099 | ENSG00000169851 | 19074876 | validated |
| mirtarbase | hsa-miR-18a-5p  | PCDH9     | 5101 | ENSG00000184226 | 22100165 | validated |
| mirtarbase | hsa-miR-15b-5p  | PCMT1     | 5110 | ENSG00000120265 | 22473208 | validated |
| mirtarbase | hsa-miR-18a-5p  | PCNA      | 5111 | ENSG00000132646 | 23622248 | validated |
| mirtarbase | hsa-miR-222-3p  | PCNT      | 5116 | ENSG00000160299 | 23622248 | validated |
| mirtarbase | hsa-miR-15b-5p  | CDK17     | 5128 | ENSG00000059758 | 22473208 | validated |
| mirtarbase | hsa-miR-222-3p  | CDK18     | 5129 | ENSG00000117266 | 23622248 | validated |
| mirtarbase | hsa-miR-15b-5p  | PDCD1     | 5133 | ENSG00000276977 | 21572407 | validated |

|            |                 |          |      |                 |          |           |
|------------|-----------------|----------|------|-----------------|----------|-----------|
| mirTarbase | hsa-miR-192-5p  | PDE2A    | 5138 | ENSG00000186642 | 16822819 | validated |
| mirTarbase | hsa-miR-326     | PDE3A    | 5139 | ENSG00000172572 | 23824327 | validated |
| mirTarbase | hsa-miR-106b-5p | PDE4C    | 5143 | ENSG00000105650 | 23313552 | validated |
| mirTarbase | hsa-miR-18a-5p  | PDE4D    | 5144 | ENSG00000113448 | 20371350 | validated |
| mirTarbase | hsa-miR-15b-5p  | PDE4D    | 5144 | ENSG00000113448 | 23592263 | validated |
| mirTarbase | hsa-miR-326     | PDE1B    | 5153 | ENSG00000123360 | 19536157 | validated |
| mirTarbase | hsa-miR-106b-5p | PDGFB    | 5155 | ENSG00000100311 | 23592263 | validated |
| mirTarbase | hsa-miR-181a-5p | PDGFRA   | 5156 | ENSG00000134853 | 22942087 | validated |
| mirTarbase | hsa-miR-326     | PDHA1    | 5160 | ENSG00000131828 | 23622248 | validated |
| mirTarbase | hsa-miR-21-5p   | PDHA2    | 5161 | ENSG00000163114 | 19253296 | validated |
| mirTarbase | hsa-miR-106b-5p | PDHB     | 5162 | ENSG00000168291 | 23313552 | validated |
| mirTarbase | hsa-miR-582-5p  | PDK1     | 5163 | ENSG00000152256 | 27418678 | validated |
| mirTarbase | hsa-miR-181a-5p | PDK3     | 5165 | ENSG00000067992 | 19536157 | validated |
| mirTarbase | hsa-miR-106b-5p | PDPK1    | 5170 | ENSG00000140992 | 23446348 | validated |
| mirTarbase | hsa-miR-192-5p  | GATB     | 5188 | ENSG00000059691 | 19074876 | validated |
| mirTarbase | hsa-miR-15b-5p  | PEX12    | 5193 | ENSG00000108733 | 22473208 | validated |
| mirTarbase | hsa-miR-15b-5p  | PEX13    | 5194 | ENSG00000162928 | 22473208 | validated |
| mirTarbase | hsa-miR-301a-3p | PEX13    | 5194 | ENSG00000162928 | 22012620 | validated |
| mirTarbase | hsa-miR-212-3p  | PFAS     | 5198 | ENSG00000178921 | 23592263 | validated |
| mirTarbase | hsa-miR-181a-5p | ATP8B1   | 5205 | ENSG00000081923 | 22012620 | validated |
| mirTarbase | hsa-miR-21-5p   | PFKFB2   | 5208 | ENSG00000123836 | 18591254 | validated |
| mirTarbase | hsa-miR-181a-5p | PFKFB2   | 5208 | ENSG00000123836 | 23622248 | validated |
| mirTarbase | hsa-miR-106b-5p | PFKFB2   | 5208 | ENSG00000123836 | 22100165 | validated |
| mirTarbase | hsa-miR-106b-5p | PFKP     | 5214 | ENSG00000067057 | 22473208 | validated |
| mirTarbase | hsa-miR-222-3p  | PFN1     | 5216 | ENSG00000108518 | 23622248 | validated |
| mirTarbase | hsa-miR-192-5p  | CDK14    | 5218 | ENSG00000058091 | 19074876 | validated |
| mirTarbase | hsa-miR-144-3p  | PGAM1    | 5223 | ENSG00000171314 | 26701625 | validated |
| mirTarbase | hsa-miR-15b-5p  | PGD      | 5226 | ENSG00000142657 | 23622248 | validated |
| mirTarbase | hsa-miR-181a-5p | PGD      | 5226 | ENSG00000142657 | 23622248 | validated |
| mirTarbase | hsa-miR-582-3p  | PGGT1B   | 5229 | ENSG00000164219 | 23295946 | validated |
| mirTarbase | hsa-miR-582-5p  | PGGT1B   | 5229 | ENSG00000164219 | 23295946 | validated |
| mirTarbase | hsa-miR-192-5p  | PGM3     | 5238 | ENSG00000013375 | 19074876 | validated |
| mirTarbase | hsa-miR-181a-5p | PGR      | 5241 | ENSG00000082175 | 22492871 | validated |
| mirTarbase | hsa-miR-21-5p   | ABCB1    | 5243 | ENSG00000085563 | 27040946 | validated |
| mirTarbase | hsa-miR-15b-5p  | PHKA1    | 5255 | ENSG00000067177 | 23446348 | validated |
| mirTarbase | hsa-miR-21-5p   | SERPINI1 | 5274 | ENSG00000163536 | 18591254 | validated |
| mirTarbase | hsa-miR-326     | PIGA     | 5277 | ENSG00000165195 | 23622248 | validated |
| mirTarbase | hsa-miR-301a-3p | PIGA     | 5277 | ENSG00000165195 | 22012620 | validated |
| mirTarbase | hsa-miR-21-5p   | PIK3C2A  | 5286 | ENSG00000011405 | 18591254 | validated |
| mirTarbase | hsa-miR-15b-5p  | PIK3C2B  | 5287 | ENSG00000133056 | 23622248 | validated |
| mirTarbase | hsa-miR-192-5p  | PIM1     | 5292 | ENSG00000137193 | 19074876 | validated |
| mirTarbase | hsa-miR-15b-5p  | PIM1     | 5292 | ENSG00000137193 | 23446348 | validated |
| mirTarbase | hsa-miR-582-5p  | PIK3CD   | 5293 | ENSG00000171608 | 26701625 | validated |
| mirTarbase | hsa-miR-21-5p   | PIK3R1   | 5295 | ENSG00000145675 | 18591254 | validated |
| mirTarbase | hsa-miR-15b-5p  | PIK3R1   | 5295 | ENSG00000145675 | 23446348 | validated |
| mirTarbase | hsa-miR-18a-5p  | PI4KB    | 5298 | ENSG00000143393 | 23622248 | validated |
| mirTarbase | hsa-miR-296-5p  | PIN1     | 5300 | ENSG00000127445 | 24915000 | validated |
| mirTarbase | hsa-miR-106b-5p | PIP4K2A  | 5305 | ENSG00000150867 | 22473208 | validated |
| mirTarbase | hsa-miR-106b-5p | PITPNA   | 5306 | ENSG00000174238 | 23592263 | validated |
| mirTarbase | hsa-miR-106b-5p | PKD2     | 5311 | ENSG00000118762 | 20709030 | validated |
| mirTarbase | hsa-miR-21-5p   | PKD2     | 5311 | ENSG00000118762 | 18591254 | validated |
| mirTarbase | hsa-miR-326     | PKM      | 5315 | ENSG00000067225 | 20667897 | validated |
| mirTarbase | hsa-miR-222-3p  | PKM      | 5315 | ENSG00000067225 | 23622248 | validated |
| mirTarbase | hsa-miR-21-5p   | PKNOX1   | 5316 | ENSG00000160199 | 18591254 | validated |
| mirTarbase | hsa-miR-106b-5p | PKNOX1   | 5316 | ENSG00000160199 | 23446348 | validated |
| mirTarbase | hsa-miR-222-3p  | PKP2     | 5318 | ENSG00000057294 | 23622248 | validated |
| mirTarbase | hsa-miR-144-3p  | PLAG1    | 5324 | ENSG00000181690 | 19347935 | validated |
| mirTarbase | hsa-miR-15b-5p  | PLAG1    | 5324 | ENSG00000181690 | 22473208 | validated |
| mirTarbase | hsa-miR-192-5p  | PLAGL2   | 5326 | ENSG00000126003 | 19074876 | validated |
| mirTarbase | hsa-miR-106b-5p | PLAGL2   | 5326 | ENSG00000126003 | 22473208 | validated |
| mirTarbase | hsa-miR-212-3p  | PLAGL2   | 5326 | ENSG00000126003 | 23592263 | validated |
| mirTarbase | hsa-miR-21-5p   | PLAT     | 5327 | ENSG00000104368 | 21131358 | validated |
| mirTarbase | hsa-miR-192-5p  | PLAU     | 5328 | ENSG00000122861 | 19074876 | validated |
| mirTarbase | hsa-miR-21-5p   | PLD1     | 5337 | ENSG00000075651 | 18591254 | validated |
| mirTarbase | hsa-miR-296-5p  | PLK1     | 5347 | ENSG00000166851 | 26549165 | validated |
| mirTarbase | hsa-miR-192-5p  | PLOD1    | 5351 | ENSG00000083444 | 19074876 | validated |
| mirTarbase | hsa-miR-15b-5p  | PLRG1    | 5356 | ENSG00000171566 | 23446348 | validated |
| mirTarbase | hsa-miR-106b-5p | PLRG1    | 5356 | ENSG00000171566 | 21572407 | validated |
| mirTarbase | hsa-miR-106b-5p | PLS1     | 5357 | ENSG00000120756 | 17242205 | validated |
| mirTarbase | hsa-miR-144-3p  | PLS1     | 5357 | ENSG00000120756 | 21572407 | validated |
| mirTarbase | hsa-miR-192-5p  | PLS3     | 5358 | ENSG00000102024 | 19074876 | validated |



|            |                 |         |      |                 |          |           |
|------------|-----------------|---------|------|-----------------|----------|-----------|
| mirtarbase | hsa-miR-106b-5p | PLXNA1  | 5361 | ENSG00000114554 | 22473208 | validated |
| mirtarbase | hsa-miR-181a-5p | PMAIP1  | 5366 | ENSG00000141682 | 22473208 | validated |
| mirtarbase | hsa-miR-106b-5p | PMAIP1  | 5366 | ENSG00000141682 | 27292025 | validated |
| mirtarbase | hsa-miR-222-3p  | EXOSC10 | 5394 | ENSG00000171824 | 23622248 | validated |
| mirtarbase | hsa-miR-106b-5p | PRRX1   | 5396 | ENSG00000116132 | 26617763 | validated |
| mirtarbase | hsa-miR-192-5p  | UBL3    | 5412 | ENSG00000122042 | 19074876 | validated |
| mirtarbase | hsa-miR-181a-5p | UBL3    | 5412 | ENSG00000122042 | 22815788 | validated |
| mirtarbase | hsa-miR-192-5p  | PODXL   | 5420 | ENSG00000128567 | 19074876 | validated |
| mirtarbase | hsa-miR-222-3p  | POLD2   | 5425 | ENSG00000106628 | 23622248 | validated |
| mirtarbase | hsa-miR-222-3p  | POLE    | 5426 | ENSG00000177084 | 23622248 | validated |
| mirtarbase | hsa-miR-505-3p  | POLG    | 5428 | ENSG00000140521 | 23824327 | validated |
| mirtarbase | hsa-miR-505-3p  | POLR2D  | 5433 | ENSG00000144231 | 23592263 | validated |
| mirtarbase | hsa-miR-301a-3p | POLR2D  | 5433 | ENSG00000144231 | 23824327 | validated |
| mirtarbase | hsa-miR-296-5p  | POLR2E  | 5434 | ENSG00000099817 | 22012620 | validated |
| mirtarbase | hsa-miR-15b-5p  | POLR2E  | 5434 | ENSG00000099817 | 26701625 | validated |
| mirtarbase | hsa-miR-106b-5p | PON2    | 5445 | ENSG00000105854 | 17242205 | validated |
| mirtarbase | hsa-miR-18a-5p  | PON2    | 5445 | ENSG00000105854 | 23622248 | validated |
| mirtarbase | hsa-miR-15b-5p  | POU2AF1 | 5450 | ENSG00000110777 | 22473208 | validated |
| mirtarbase | hsa-miR-192-5p  | POU2F1  | 5451 | ENSG00000143190 | 19074876 | validated |
| mirtarbase | hsa-miR-15b-5p  | POU2F1  | 5451 | ENSG00000143190 | 23622248 | validated |
| mirtarbase | hsa-miR-144-3p  | POU2F1  | 5451 | ENSG00000143190 | 20371350 | validated |
| mirtarbase | hsa-miR-192-5p  | PPARG   | 5468 | ENSG00000132170 | 19074876 | validated |
| mirtarbase | hsa-miR-192-5p  | PPAT    | 5471 | ENSG00000128059 | 19074876 | validated |
| mirtarbase | hsa-miR-326     | CTSA    | 5476 | ENSG00000064601 | 26701625 | validated |
| mirtarbase | hsa-miR-106b-5p | PPIA    | 5478 | ENSG00000196262 | 23622248 | validated |
| mirtarbase | hsa-miR-18a-5p  | PPIA    | 5478 | ENSG00000196262 | 23622248 | validated |
| mirtarbase | hsa-miR-301a-3p | PPIB    | 5479 | ENSG00000166794 | 23622248 | validated |
| mirtarbase | hsa-miR-144-3p  | PPIC    | 5480 | ENSG00000168938 | 23592263 | validated |
| mirtarbase | hsa-miR-192-5p  | PPM1A   | 5494 | ENSG00000100614 | 19074876 | validated |
| mirtarbase | hsa-miR-15b-5p  | PPM1A   | 5494 | ENSG00000100614 | 20371350 | validated |
| mirtarbase | hsa-miR-106b-5p | PPM1B   | 5495 | ENSG00000138032 | 23622248 | validated |
| mirtarbase | hsa-miR-192-5p  | PPP1CA  | 5499 | ENSG00000172531 | 19074876 | validated |
| mirtarbase | hsa-miR-192-5p  | PPP1CB  | 5500 | ENSG00000213639 | 19074876 | validated |
| mirtarbase | hsa-miR-18a-5p  | PPP1CB  | 5500 | ENSG00000213639 | 20371350 | validated |
| mirtarbase | hsa-miR-505-3p  | PPP1CB  | 5500 | ENSG00000213639 | 23622248 | validated |
| mirtarbase | hsa-miR-15b-5p  | PPP1CB  | 5500 | ENSG00000213639 | 23622248 | validated |
| mirtarbase | hsa-miR-15b-5p  | PPP1CC  | 5501 | ENSG00000186298 | 23622248 | validated |
| mirtarbase | hsa-miR-582-5p  | PPP1CC  | 5501 | ENSG00000186298 | 23592263 | validated |
| mirtarbase | hsa-miR-222-3p  | PPP2R1A | 5518 | ENSG00000105568 | 23622248 | validated |
| mirtarbase | hsa-miR-144-3p  | PPP2R2A | 5520 | ENSG00000221914 | 20371350 | validated |
| mirtarbase | hsa-miR-326     | PTPA    | 5524 | ENSG00000119383 | 23622248 | validated |
| mirtarbase | hsa-miR-15b-5p  | PPP2R5C | 5527 | ENSG00000078304 | 21572407 | validated |
| mirtarbase | hsa-miR-582-5p  | PPP2R5E | 5529 | ENSG00000154001 | 23592263 | validated |
| mirtarbase | hsa-miR-181a-5p | PPP2R5E | 5529 | ENSG00000154001 | 23592263 | validated |
| mirtarbase | hsa-miR-181a-5p | PPP3CA  | 5530 | ENSG00000138814 | 23677691 | validated |
| mirtarbase | hsa-miR-106b-5p | PPP4C   | 5531 | ENSG00000149923 | 23622248 | validated |
| mirtarbase | hsa-miR-106b-5p | PPP3R1  | 5534 | ENSG00000221823 | 22473208 | validated |
| mirtarbase | hsa-miR-222-3p  | PPP6C   | 5537 | ENSG00000119414 | 23622248 | validated |
| mirtarbase | hsa-miR-106b-5p | PPP6C   | 5537 | ENSG00000119414 | 22473208 | validated |
| mirtarbase | hsa-miR-144-3p  | PPP6C   | 5537 | ENSG00000119414 | 23446348 | validated |
| mirtarbase | hsa-miR-15b-5p  | PPP6C   | 5537 | ENSG00000119414 | 22473208 | validated |
| mirtarbase | hsa-miR-15b-5p  | PPT1    | 5538 | ENSG00000131238 | 23622248 | validated |
| mirtarbase | hsa-miR-181a-5p | SRGN    | 5552 | ENSG00000122862 | 22473208 | validated |
| mirtarbase | hsa-miR-192-5p  | PRIM1   | 5557 | ENSG00000198056 | 19074876 | validated |
| mirtarbase | hsa-miR-106b-5p | PRIM1   | 5557 | ENSG00000198056 | 23446348 | validated |
| mirtarbase | hsa-miR-582-5p  | PRKAA1  | 5562 | ENSG00000132356 | 23592263 | validated |
| mirtarbase | hsa-miR-301a-3p | PRKAA1  | 5562 | ENSG00000132356 | 23446348 | validated |
| mirtarbase | hsa-miR-15b-5p  | PRKAA1  | 5562 | ENSG00000132356 | 21572407 | validated |
| mirtarbase | hsa-miR-192-5p  | PRKAA2  | 5563 | ENSG00000162409 | 19074876 | validated |
| mirtarbase | hsa-miR-21-5p   | PRKAB2  | 5565 | ENSG00000131791 | 18591254 | validated |
| mirtarbase | hsa-miR-106b-5p | PRKACB  | 5567 | ENSG00000142875 | 21572407 | validated |
| mirtarbase | hsa-miR-192-5p  | PRKAR1A | 5573 | ENSG00000108946 | 19074876 | validated |
| mirtarbase | hsa-miR-106b-5p | PRKAR1A | 5573 | ENSG00000108946 | 22012620 | validated |
| mirtarbase | hsa-miR-15b-5p  | PRKAR2A | 5576 | ENSG00000114302 | 23592263 | validated |
| mirtarbase | hsa-miR-505-3p  | PRKCA   | 5578 | ENSG00000154229 | 23622248 | validated |
| mirtarbase | hsa-miR-106b-5p | PRKCB   | 5579 | ENSG00000166501 | 24906430 | validated |
| mirtarbase | hsa-miR-15b-5p  | PRKCD   | 5580 | ENSG00000163932 | 22473208 | validated |
| mirtarbase | hsa-miR-181a-5p | PRKCD   | 5580 | ENSG00000163932 | 22473208 | validated |
| mirtarbase | hsa-miR-21-5p   | PRKCE   | 5581 | ENSG00000171132 | 18591254 | validated |
| mirtarbase | hsa-miR-15b-5p  | MAPK1   | 5594 | ENSG00000100030 | 23622248 | validated |
| mirtarbase | hsa-miR-181a-5p | MAPK1   | 5594 | ENSG00000100030 | 23911747 | validated |

|            |                 |         |      |                 |          |           |
|------------|-----------------|---------|------|-----------------|----------|-----------|
| mirtarbase | hsa-miR-106b-5p | MAPK1   | 5594 | ENSG00000100030 | 22473208 | validated |
| mirtarbase | hsa-miR-301a-3p | MAPK1   | 5594 | ENSG00000100030 | 24398324 | validated |
| mirtarbase | hsa-miR-106b-5p | MAPK9   | 5601 | ENSG00000050748 | 21283765 | validated |
| mirtarbase | hsa-miR-192-5p  | MAPK9   | 5601 | ENSG00000050748 | 19074876 | validated |
| mirtarbase | hsa-miR-18a-5p  | MAPK13  | 5603 | ENSG00000156711 | 23446348 | validated |
| mirtarbase | hsa-miR-181a-5p | MAP2K1  | 5604 | ENSG00000169032 | 20371350 | validated |
| mirtarbase | hsa-miR-21-5p   | MAP2K3  | 5606 | ENSG00000034152 | 24112539 | validated |
| mirtarbase | hsa-miR-15b-5p  | MAP2K3  | 5606 | ENSG00000034152 | 26701625 | validated |
| mirtarbase | hsa-miR-15b-5p  | EIF2AK2 | 5610 | ENSG00000055332 | 23622248 | validated |
| mirtarbase | hsa-miR-192-5p  | DNAJC3  | 5611 | ENSG00000102580 | 19074876 | validated |
| mirtarbase | hsa-miR-181a-5p | PRLR    | 5618 | ENSG00000113494 | 17612493 | validated |
| mirtarbase | hsa-miR-192-5p  | PRNP    | 5621 | ENSG00000171867 | 19074876 | validated |
| mirtarbase | hsa-miR-106b-5p | PRNP    | 5621 | ENSG00000171867 | 22473208 | validated |
| mirtarbase | hsa-miR-301a-3p | PRNP    | 5621 | ENSG00000171867 | 22100165 | validated |
| mirtarbase | hsa-miR-181a-5p | PROX1   | 5629 | ENSG00000117707 | 20558617 | validated |
| mirtarbase | hsa-miR-15b-5p  | PRPS1   | 5631 | ENSG00000147224 | 23622248 | validated |
| mirtarbase | hsa-miR-192-5p  | PRPS2   | 5634 | ENSG00000101911 | 19074876 | validated |
| mirtarbase | hsa-miR-106b-5p | PRRG1   | 5638 | ENSG00000130962 | 17242205 | validated |
| mirtarbase | hsa-miR-192-5p  | LGMN    | 5641 | ENSG00000100600 | 19074876 | validated |
| mirtarbase | hsa-miR-15b-5p  | PSKH1   | 5681 | ENSG00000159792 | 22473208 | validated |
| mirtarbase | hsa-miR-212-3p  | PSMA2   | 5683 | ENSG00000106588 | 23446348 | validated |
| mirtarbase | hsa-miR-106b-5p | PSMA3   | 5684 | ENSG00000100567 | 23622248 | validated |
| mirtarbase | hsa-miR-18a-5p  | PSMB5   | 5693 | ENSG00000100804 | 20371350 | validated |
| mirtarbase | hsa-miR-301a-3p | PSMB5   | 5693 | ENSG00000100804 | 23824327 | validated |
| mirtarbase | hsa-miR-15b-5p  | PSMB5   | 5693 | ENSG00000100804 | 22473208 | validated |
| mirtarbase | hsa-miR-192-5p  | PSMB5   | 5693 | ENSG00000100804 | 27418678 | validated |
| mirtarbase | hsa-miR-222-3p  | PSMC4   | 5704 | ENSG00000013275 | 23622248 | validated |
| mirtarbase | hsa-miR-15b-5p  | PSMD7   | 5713 | ENSG00000103035 | 23622248 | validated |
| mirtarbase | hsa-miR-21-5p   | PSMD9   | 5715 | ENSG00000110801 | 26500453 | validated |
| mirtarbase | hsa-miR-505-3p  | PSMD10  | 5716 | ENSG00000101843 | 26394032 | validated |
| mirtarbase | hsa-miR-15b-5p  | PTBP1   | 5725 | ENSG00000011304 | 23622248 | validated |
| mirtarbase | hsa-miR-212-3p  | PTCH1   | 5727 | ENSG00000185920 | 22357618 | validated |
| mirtarbase | hsa-miR-18a-5p  | PTEN    | 5728 | ENSG00000171862 | 20008935 | validated |
| mirtarbase | hsa-miR-106b-5p | PTEN    | 5728 | ENSG00000171862 | 21283765 | validated |
| mirtarbase | hsa-miR-144-3p  | PTEN    | 5728 | ENSG00000171862 | 23125220 | validated |
| mirtarbase | hsa-miR-301a-3p | PTEN    | 5728 | ENSG00000171862 | 24315818 | validated |
| mirtarbase | hsa-miR-181a-5p | PTEN    | 5728 | ENSG00000171862 | 26323677 | validated |
| mirtarbase | hsa-miR-106b-5p | PTGER4  | 5734 | ENSG00000171522 | 22473208 | validated |
| mirtarbase | hsa-miR-21-5p   | PTGFR   | 5737 | ENSG00000122420 | 18591254 | validated |
| mirtarbase | hsa-miR-106b-5p | PTGFRN  | 5738 | ENSG00000134247 | 23592263 | validated |
| mirtarbase | hsa-miR-106b-5p | PTGIS   | 5740 | ENSG00000124212 | 23313552 | validated |
| mirtarbase | hsa-miR-181a-5p | PTGS2   | 5743 | ENSG00000073756 | 17612493 | validated |
| mirtarbase | hsa-miR-144-3p  | PTGS2   | 5743 | ENSG00000073756 | 26959737 | validated |
| mirtarbase | hsa-miR-21-5p   | PTK2    | 5747 | ENSG00000169398 | 18591254 | validated |
| mirtarbase | hsa-miR-106b-5p | TWF1    | 5756 | ENSG00000151239 | 22473208 | validated |
| mirtarbase | hsa-miR-18a-5p  | TWF1    | 5756 | ENSG00000151239 | 21572407 | validated |
| mirtarbase | hsa-miR-106b-5p | QSOX1   | 5768 | ENSG00000116260 | 23446348 | validated |
| mirtarbase | hsa-miR-301a-3p | QSOX1   | 5768 | ENSG00000116260 | 27292025 | validated |
| mirtarbase | hsa-miR-21-5p   | PTPN3   | 5774 | ENSG00000070159 | 18591254 | validated |
| mirtarbase | hsa-miR-106b-5p | PTPN4   | 5775 | ENSG00000088179 | 22473208 | validated |
| mirtarbase | hsa-miR-301a-3p | PTPN4   | 5775 | ENSG00000088179 | 24398324 | validated |
| mirtarbase | hsa-miR-181a-5p | PTPN11  | 5781 | ENSG00000179295 | 17382377 | validated |
| mirtarbase | hsa-miR-21-5p   | PTPN14  | 5784 | ENSG00000152104 | 20048743 | validated |
| mirtarbase | hsa-miR-15b-5p  | PTPRD   | 5789 | ENSG00000153707 | 21572407 | validated |
| mirtarbase | hsa-miR-192-5p  | PTPRE   | 5791 | ENSG00000132334 | 19074876 | validated |
| mirtarbase | hsa-miR-301a-3p | PTPRG   | 5793 | ENSG00000144724 | 21572407 | validated |
| mirtarbase | hsa-miR-15b-5p  | PTPRJ   | 5795 | ENSG00000149177 | 22473208 | validated |
| mirtarbase | hsa-miR-505-3p  | PTPRJ   | 5795 | ENSG00000149177 | 23824327 | validated |
| mirtarbase | hsa-miR-181a-5p | PTPRZ1  | 5803 | ENSG00000106278 | 17612493 | validated |
| mirtarbase | hsa-miR-192-5p  | PTS     | 5805 | ENSG00000150787 | 19074876 | validated |
| mirtarbase | hsa-miR-21-5p   | PTX3    | 5806 | ENSG00000163661 | 21131358 | validated |
| mirtarbase | hsa-miR-192-5p  | RAD1    | 5810 | ENSG00000113456 | 19074876 | validated |
| mirtarbase | hsa-miR-15b-5p  | PURA    | 5813 | ENSG00000185129 | 22835829 | validated |
| mirtarbase | hsa-miR-106b-5p | PURA    | 5813 | ENSG00000185129 | 22835829 | validated |
| mirtarbase | hsa-miR-192-5p  | PURA    | 5813 | ENSG00000185129 | 19074876 | validated |
| mirtarbase | hsa-miR-21-5p   | PURA    | 5813 | ENSG00000185129 | 18591254 | validated |
| mirtarbase | hsa-miR-21-5p   | PURB    | 5814 | ENSG00000146676 | 18591254 | validated |
| mirtarbase | hsa-miR-106b-5p | PURB    | 5814 | ENSG00000146676 | 22473208 | validated |
| mirtarbase | hsa-miR-582-5p  | PURB    | 5814 | ENSG00000146676 | 21572407 | validated |
| mirtarbase | hsa-miR-144-3p  | PURB    | 5814 | ENSG00000146676 | 21572407 | validated |
| mirtarbase | hsa-miR-181a-5p | PURB    | 5814 | ENSG00000146676 | 22473208 | validated |

|            |                 |         |      |                 |          |           |
|------------|-----------------|---------|------|-----------------|----------|-----------|
| mirTarbase | hsa-miR-106b-5p | PVR     | 5817 | ENSG00000073008 | 21572407 | validated |
| mirTarbase | hsa-miR-21-5p   | ABCD3   | 5825 | ENSG00000117528 | 18591254 | validated |
| mirTarbase | hsa-miR-15b-5p  | PXMP2   | 5827 | ENSG00000176894 | 23622248 | validated |
| mirTarbase | hsa-miR-212-3p  | PXN     | 5829 | ENSG00000089159 | 26693054 | validated |
| mirTarbase | hsa-miR-15b-5p  | QARS1   | 5859 | ENSG00000172053 | 23622248 | validated |
| mirTarbase | hsa-miR-582-5p  | QDPR    | 5860 | ENSG00000151552 | 23592263 | validated |
| mirTarbase | hsa-miR-192-5p  | RAB1A   | 5861 | ENSG00000138069 | 19074876 | validated |
| mirTarbase | hsa-miR-15b-5p  | RAB1A   | 5861 | ENSG00000138069 | 26023735 | validated |
| mirTarbase | hsa-miR-192-5p  | RAB2A   | 5862 | ENSG00000104388 | 16822819 | validated |
| mirTarbase | hsa-miR-192-5p  | RAB3B   | 5865 | ENSG00000169213 | 19074876 | validated |
| mirTarbase | hsa-miR-18a-5p  | RAB5A   | 5868 | ENSG00000144566 | 20371350 | validated |
| mirTarbase | hsa-miR-106b-5p | RAB5B   | 5869 | ENSG00000111540 | 22473208 | validated |
| mirTarbase | hsa-miR-301a-3p | RAB5B   | 5869 | ENSG00000111540 | 23592263 | validated |
| mirTarbase | hsa-miR-212-3p  | RAB5B   | 5869 | ENSG00000111540 | 21572407 | validated |
| mirTarbase | hsa-miR-21-5p   | RAB6A   | 5870 | ENSG00000175582 | 18591254 | validated |
| mirTarbase | hsa-miR-15b-5p  | MAP4K2  | 5871 | ENSG00000168067 | 21572407 | validated |
| mirTarbase | hsa-miR-192-5p  | RAB27A  | 5873 | ENSG00000069974 | 19074876 | validated |
| mirTarbase | hsa-miR-582-3p  | RAB27A  | 5873 | ENSG00000069974 | 23295946 | validated |
| mirTarbase | hsa-miR-582-5p  | RAB27A  | 5873 | ENSG00000069974 | 23295946 | validated |
| mirTarbase | hsa-miR-18a-5p  | RAB5C   | 5878 | ENSG00000108774 | 23592263 | validated |
| mirTarbase | hsa-miR-582-5p  | RAC1    | 5879 | ENSG00000136238 | 23592263 | validated |
| mirTarbase | hsa-miR-144-3p  | RAC1    | 5879 | ENSG00000136238 | 23592263 | validated |
| mirTarbase | hsa-miR-192-5p  | RAD21   | 5885 | ENSG00000164754 | 19074876 | validated |
| mirTarbase | hsa-miR-106b-5p | RAD23B  | 5887 | ENSG00000119318 | 23622248 | validated |
| mirTarbase | hsa-miR-15b-5p  | RAD23B  | 5887 | ENSG00000119318 | 22473208 | validated |
| mirTarbase | hsa-miR-192-5p  | RAD51   | 5888 | ENSG00000051180 | 19074876 | validated |
| mirTarbase | hsa-miR-301a-3p | RAG1    | 5896 | ENSG00000166349 | 22012620 | validated |
| mirTarbase | hsa-miR-181a-5p | RALA    | 5898 | ENSG00000006451 | 22442671 | validated |
| mirTarbase | hsa-miR-106b-5p | RAN     | 5901 | ENSG00000132341 | 22473208 | validated |
| mirTarbase | hsa-miR-301a-3p | RAN     | 5901 | ENSG00000132341 | 23446348 | validated |
| mirTarbase | hsa-miR-181a-5p | RAN     | 5901 | ENSG00000132341 | 22473208 | validated |
| mirTarbase | hsa-miR-106b-5p | RANGAP1 | 5905 | ENSG00000100401 | 23824327 | validated |
| mirTarbase | hsa-miR-18a-5p  | RAP1A   | 5906 | ENSG00000116473 | 23446348 | validated |
| mirTarbase | hsa-miR-181a-5p | RAP1B   | 5908 | ENSG00000127314 | 24573637 | validated |
| mirTarbase | hsa-miR-192-5p  | RAP1GAP | 5909 | ENSG00000076864 | 19074876 | validated |
| mirTarbase | hsa-miR-15b-5p  | RARB    | 5915 | ENSG00000077092 | 23446348 | validated |
| mirTarbase | hsa-miR-212-3p  | RB1     | 5925 | ENSG00000139687 | 21329664 | validated |
| mirTarbase | hsa-miR-21-5p   | RB1     | 5925 | ENSG00000139687 | 18591254 | validated |
| mirTarbase | hsa-miR-21-5p   | ARID4A  | 5926 | ENSG00000032219 | 18591254 | validated |
| mirTarbase | hsa-miR-181a-5p | KDM5A   | 5927 | ENSG00000073614 | 22473208 | validated |
| mirTarbase | hsa-miR-15b-5p  | RBBP6   | 5930 | ENSG00000122257 | 24398324 | validated |
| mirTarbase | hsa-miR-106b-5p | RBBP7   | 5931 | ENSG00000102054 | 22473208 | validated |
| mirTarbase | hsa-miR-106b-5p | RBL1    | 5933 | ENSG00000080839 | 21283765 | validated |
| mirTarbase | hsa-miR-192-5p  | RBL2    | 5934 | ENSG00000103479 | 16822819 | validated |
| mirTarbase | hsa-miR-106b-5p | RBL2    | 5934 | ENSG00000103479 | 21283765 | validated |
| mirTarbase | hsa-miR-222-3p  | RBMS2   | 5939 | ENSG00000076067 | 23824327 | validated |
| mirTarbase | hsa-miR-212-3p  | RBP2    | 5948 | ENSG00000114113 | 23922798 | validated |
| mirTarbase | hsa-miR-192-5p  | RECQL   | 5965 | ENSG00000004700 | 19074876 | validated |
| mirTarbase | hsa-miR-15b-5p  | REL     | 5966 | ENSG00000162924 | 23592263 | validated |
| mirTarbase | hsa-miR-582-5p  | REL     | 5966 | ENSG00000162924 | 23592263 | validated |
| mirTarbase | hsa-miR-21-5p   | REST    | 5978 | ENSG00000084093 | 19242418 | validated |
| mirTarbase | hsa-miR-106b-5p | REST    | 5978 | ENSG00000084093 | 23446348 | validated |
| mirTarbase | hsa-miR-505-3p  | REST    | 5978 | ENSG00000084093 | 20371350 | validated |
| mirTarbase | hsa-miR-192-5p  | RET     | 5979 | ENSG00000165731 | 19074876 | validated |
| mirTarbase | hsa-miR-21-5p   | REV3L   | 5980 | ENSG00000009413 | 18591254 | validated |
| mirTarbase | hsa-miR-222-3p  | RFC1    | 5981 | ENSG00000035928 | 23622248 | validated |
| mirTarbase | hsa-miR-301a-3p | RFC2    | 5982 | ENSG00000049541 | 23824327 | validated |
| mirTarbase | hsa-miR-192-5p  | RFC4    | 5984 | ENSG00000163918 | 19074876 | validated |
| mirTarbase | hsa-miR-301a-3p | RFXAP   | 5994 | ENSG00000133111 | 19536157 | validated |
| mirTarbase | hsa-miR-106b-5p | RFXAP   | 5994 | ENSG00000133111 | 19536157 | validated |
| mirTarbase | hsa-miR-212-3p  | RFXAP   | 5994 | ENSG00000133111 | 26337469 | validated |
| mirTarbase | hsa-miR-505-3p  | RGS2    | 5997 | ENSG00000116741 | 28735896 | validated |
| mirTarbase | hsa-miR-181a-5p | RGS16   | 6004 | ENSG00000143333 | 22473208 | validated |
| mirTarbase | hsa-miR-21-5p   | RHO     | 6010 | ENSG00000163914 | 23446999 | validated |
| mirTarbase | hsa-miR-181a-5p | RLF     | 6018 | ENSG00000117000 | 17612493 | validated |
| mirTarbase | hsa-miR-192-5p  | RNASE4  | 6038 | ENSG00000258818 | 19074876 | validated |
| mirTarbase | hsa-miR-192-5p  | RNASEL  | 6041 | ENSG00000135828 | 19074876 | validated |
| mirTarbase | hsa-miR-181a-5p | RNF2    | 6045 | ENSG00000121481 | 21840484 | validated |
| mirTarbase | hsa-miR-222-3p  | RNF4    | 6047 | ENSG00000063978 | 23622248 | validated |
| mirTarbase | hsa-miR-18a-5p  | RNF4    | 6047 | ENSG00000063978 | 23622248 | validated |
| mirTarbase | hsa-miR-192-5p  | RNF6    | 6049 | ENSG00000127870 | 19074876 | validated |

|            |                 |         |      |                 |          |           |
|------------|-----------------|---------|------|-----------------|----------|-----------|
| mirTarbase | hsa-miR-21-5p   | RNF6    | 6049 | ENSG00000127870 | 21572407 | validated |
| mirTarbase | hsa-miR-181a-5p | RNF6    | 6049 | ENSG00000127870 | 21572407 | validated |
| mirTarbase | hsa-miR-15b-5p  | RNH1    | 6050 | ENSG00000276230 | 22473208 | validated |
| mirTarbase | hsa-miR-106b-5p | RORA    | 6095 | ENSG00000069667 | 17242205 | validated |
| mirTarbase | hsa-miR-144-3p  | RORA    | 6095 | ENSG00000069667 | 22012620 | validated |
| mirTarbase | hsa-miR-18a-5p  | RORA    | 6095 | ENSG00000069667 | 21572407 | validated |
| mirTarbase | hsa-miR-181a-5p | RP2     | 6102 | ENSG00000102218 | 22473208 | validated |
| mirTarbase | hsa-miR-106b-5p | RPA2    | 6118 | ENSG00000117748 | 22473208 | validated |
| mirTarbase | hsa-miR-106b-5p | RPL7    | 6129 | ENSG00000147604 | 23622248 | validated |
| mirTarbase | hsa-miR-18a-5p  | RPL7A   | 6130 | ENSG00000148303 | 23622248 | validated |
| mirTarbase | hsa-miR-222-3p  | RPL8    | 6132 | ENSG00000161016 | 23622248 | validated |
| mirTarbase | hsa-miR-505-3p  | RPL9    | 6133 | ENSG00000163682 | 23622248 | validated |
| mirTarbase | hsa-miR-18a-5p  | RPL9    | 6133 | ENSG00000163682 | 23622248 | validated |
| mirTarbase | hsa-miR-222-3p  | RPL12   | 6136 | ENSG00000197958 | 23622248 | validated |
| mirTarbase | hsa-miR-106b-5p | RPL17   | 6139 | ENSG00000265681 | 22473208 | validated |
| mirTarbase | hsa-miR-106b-5p | RPL18   | 6141 | ENSG00000063177 | 23622248 | validated |
| mirTarbase | hsa-miR-301a-3p | RPL18A  | 6142 | ENSG00000105640 | 23622248 | validated |
| mirTarbase | hsa-miR-106b-5p | RPL18A  | 6142 | ENSG00000105640 | 23622248 | validated |
| mirTarbase | hsa-miR-106b-5p | RPL21   | 6144 | ENSG00000122026 | 23622248 | validated |
| mirTarbase | hsa-miR-15b-5p  | RPL27A  | 6157 | ENSG00000166441 | 23622248 | validated |
| mirTarbase | hsa-miR-505-3p  | RPLP0   | 6175 | ENSG00000089157 | 23622248 | validated |
| mirTarbase | hsa-miR-15b-5p  | RPLP0   | 6175 | ENSG00000089157 | 23622248 | validated |
| mirTarbase | hsa-miR-222-3p  | RPS2    | 6187 | ENSG00000140988 | 23622248 | validated |
| mirTarbase | hsa-miR-15b-5p  | RPS3    | 6188 | ENSG00000149273 | 23622248 | validated |
| mirTarbase | hsa-miR-15b-5p  | RPS3A   | 6189 | ENSG00000145425 | 23622248 | validated |
| mirTarbase | hsa-miR-15b-5p  | RPS5    | 6193 | ENSG00000083845 | 22473208 | validated |
| mirTarbase | hsa-miR-15b-5p  | RPS6    | 6194 | ENSG00000137154 | 23622248 | validated |
| mirTarbase | hsa-miR-21-5p   | RPS6KA3 | 6197 | ENSG00000177189 | 18591254 | validated |
| mirTarbase | hsa-miR-181a-5p | RPS6KA3 | 6197 | ENSG00000177189 | 23824327 | validated |
| mirTarbase | hsa-miR-15b-5p  | RPS6KA3 | 6197 | ENSG00000177189 | 22473208 | validated |
| mirTarbase | hsa-miR-192-5p  | RPS6KB1 | 6198 | ENSG00000108443 | 19074876 | validated |
| mirTarbase | hsa-miR-15b-5p  | RPS6KB1 | 6198 | ENSG00000108443 | 24398324 | validated |
| mirTarbase | hsa-miR-21-5p   | RPS7    | 6201 | ENSG00000171863 | 19253296 | validated |
| mirTarbase | hsa-miR-181a-5p | RPS8    | 6202 | ENSG00000142937 | 23622248 | validated |
| mirTarbase | hsa-miR-106b-5p | RPS14   | 6208 | ENSG00000164587 | 23622248 | validated |
| mirTarbase | hsa-miR-505-3p  | RPS15   | 6209 | ENSG00000115268 | 23622248 | validated |
| mirTarbase | hsa-miR-301a-3p | RPS15A  | 6210 | ENSG00000134419 | 23824327 | validated |
| mirTarbase | hsa-miR-222-3p  | RPS17   | 6218 | ENSG00000278229 | 23622248 | validated |
| mirTarbase | hsa-miR-106b-5p | RPS27A  | 6233 | ENSG00000143947 | 23592263 | validated |
| mirTarbase | hsa-miR-301a-3p | RPS27A  | 6233 | ENSG00000143947 | 23592263 | validated |
| mirTarbase | hsa-miR-106b-5p | RREB1   | 6239 | ENSG00000124782 | 23622248 | validated |
| mirTarbase | hsa-miR-582-5p  | RREB1   | 6239 | ENSG00000124782 | 23592263 | validated |
| mirTarbase | hsa-miR-582-3p  | RREB1   | 6239 | ENSG00000124782 | 23592263 | validated |
| mirTarbase | hsa-miR-144-3p  | RREB1   | 6239 | ENSG00000124782 | 20371350 | validated |
| mirTarbase | hsa-miR-192-5p  | RRM1    | 6240 | ENSG00000167325 | 16822819 | validated |
| mirTarbase | hsa-miR-106b-5p | RRM2    | 6241 | ENSG00000171848 | 22473208 | validated |
| mirTarbase | hsa-miR-582-5p  | RRM2    | 6241 | ENSG00000171848 | 23592263 | validated |
| mirTarbase | hsa-miR-15b-5p  | RS1     | 6247 | ENSG00000102104 | 23706177 | validated |
| mirTarbase | hsa-miR-301a-3p | CLIP1   | 6249 | ENSG00000130779 | 24398324 | validated |
| mirTarbase | hsa-miR-106b-5p | RTN2    | 6253 | ENSG00000125744 | 23313552 | validated |
| mirTarbase | hsa-miR-181a-5p | S100A1  | 6271 | ENSG00000160678 | 17612493 | validated |
| mirTarbase | hsa-miR-222-3p  | SORT1   | 6272 | ENSG00000134243 | 23622248 | validated |
| mirTarbase | hsa-miR-181a-5p | SORT1   | 6272 | ENSG00000134243 | 22473208 | validated |
| mirTarbase | hsa-miR-296-5p  | S100A2  | 6273 | ENSG00000196754 | 22012620 | validated |
| mirTarbase | hsa-miR-296-5p  | S100B   | 6285 | ENSG00000160307 | 27186401 | validated |
| mirTarbase | hsa-miR-505-3p  | SALL1   | 6299 | ENSG00000103449 | 22012620 | validated |
| mirTarbase | hsa-miR-15b-5p  | SALL1   | 6299 | ENSG00000103449 | 21572407 | validated |
| mirTarbase | hsa-miR-21-5p   | SATB1   | 6304 | ENSG00000182568 | 22227207 | validated |
| mirTarbase | hsa-miR-582-5p  | MSMO1   | 6307 | ENSG00000052802 | 23592263 | validated |
| mirTarbase | hsa-miR-106b-5p | MSMO1   | 6307 | ENSG00000052802 | 22473208 | validated |
| mirTarbase | hsa-miR-301a-3p | MSMO1   | 6307 | ENSG00000052802 | 21572407 | validated |
| mirTarbase | hsa-miR-106b-5p | ATXN1   | 6310 | ENSG00000124788 | 22473208 | validated |
| mirTarbase | hsa-miR-144-3p  | ATXN1   | 6310 | ENSG00000124788 | 21572407 | validated |
| mirTarbase | hsa-miR-192-5p  | ATXN7   | 6314 | ENSG00000285258 | 16822819 | validated |
| mirTarbase | hsa-miR-181a-5p | ATXN7   | 6314 | ENSG00000285258 | 23824327 | validated |
| mirTarbase | hsa-miR-181a-5p | SCD     | 6319 | ENSG00000099194 | 20371350 | validated |
| mirTarbase | hsa-miR-192-5p  | SCD     | 6319 | ENSG00000099194 | 19074876 | validated |
| mirTarbase | hsa-miR-106b-5p | SCD     | 6319 | ENSG00000099194 | 21572407 | validated |
| mirTarbase | hsa-miR-505-3p  | SCD     | 6319 | ENSG00000099194 | 26701625 | validated |
| mirTarbase | hsa-miR-582-3p  | SCN4B   | 6330 | ENSG00000177098 | 26701625 | validated |
| mirTarbase | hsa-miR-192-5p  | SCN5A   | 6331 | ENSG00000183873 | 26209011 | validated |

|            |                 |         |      |                 |          |           |
|------------|-----------------|---------|------|-----------------|----------|-----------|
| mirtarbase | hsa-miR-181a-5p | SCN8A   | 6334 | ENSG00000196876 | 23824327 | validated |
| mirtarbase | hsa-miR-21-5p   | CCL1    | 6346 | ENSG00000108702 | 22473208 | validated |
| mirtarbase | hsa-miR-106b-5p | CCL1    | 6346 | ENSG00000108702 | 22473208 | validated |
| mirtarbase | hsa-miR-192-5p  | CCL3L1  | 6349 | ENSG00000277336 | 19074876 | validated |
| mirtarbase | hsa-miR-192-5p  | CCL3L3  | 6349 | ENSG00000277336 | 19074876 | validated |
| mirtarbase | hsa-miR-106b-5p | CCL5    | 6352 | ENSG00000274233 | 23313552 | validated |
| mirtarbase | hsa-miR-21-5p   | CCL20   | 6364 | ENSG00000115009 | 22001440 | validated |
| mirtarbase | hsa-miR-181a-5p | CCL22   | 6367 | ENSG00000102962 | 22473208 | validated |
| mirtarbase | hsa-miR-18a-5p  | SDC4    | 6385 | ENSG00000124145 | 25089138 | validated |
| mirtarbase | hsa-miR-222-3p  | SDHA    | 6389 | ENSG00000073578 | 23622248 | validated |
| mirtarbase | hsa-miR-505-3p  | SEC13   | 6396 | ENSG00000157020 | 23622248 | validated |
| mirtarbase | hsa-miR-21-5p   | TRAPPC2 | 6399 | ENSG00000196459 | 18591254 | validated |
| mirtarbase | hsa-miR-106b-5p | TRAPPC2 | 6399 | ENSG00000196459 | 21572407 | validated |
| mirtarbase | hsa-miR-222-3p  | SELE    | 6401 | ENSG00000007908 | 19949084 | validated |
| mirtarbase | hsa-miR-15b-5p  | MAP2K4  | 6416 | ENSG00000065559 | 23622248 | validated |
| mirtarbase | hsa-miR-582-5p  | SET     | 6418 | ENSG00000119335 | 23592263 | validated |
| mirtarbase | hsa-miR-21-5p   | SET     | 6418 | ENSG00000119335 | 22473208 | validated |
| mirtarbase | hsa-miR-582-3p  | SFRP1   | 6422 | ENSG00000104332 | 26468775 | validated |
| mirtarbase | hsa-miR-505-3p  | SRSF1   | 6426 | ENSG00000136450 | 20923760 | validated |
| mirtarbase | hsa-miR-15b-5p  | SRSF1   | 6426 | ENSG00000136450 | 23446348 | validated |
| mirtarbase | hsa-miR-106b-5p | SRSF2   | 6427 | ENSG00000161547 | 22473208 | validated |
| mirtarbase | hsa-miR-222-3p  | SRSF2   | 6427 | ENSG00000161547 | 20371350 | validated |
| mirtarbase | hsa-miR-301a-3p | SRSF2   | 6427 | ENSG00000161547 | 20371350 | validated |
| mirtarbase | hsa-miR-18a-5p  | SRSF6   | 6431 | ENSG00000124193 | 23622248 | validated |
| mirtarbase | hsa-miR-181a-5p | SRSF7   | 6432 | ENSG00000115875 | 20371350 | validated |
| mirtarbase | hsa-miR-192-5p  | SGCB    | 6443 | ENSG00000163069 | 19074876 | validated |
| mirtarbase | hsa-miR-21-5p   | SGCB    | 6443 | ENSG00000163069 | 18591254 | validated |
| mirtarbase | hsa-miR-181a-5p | SH3BGRL | 6451 | ENSG00000131171 | 17612493 | validated |
| mirtarbase | hsa-miR-582-5p  | SHMT1   | 6470 | ENSG00000176974 | 27292025 | validated |
| mirtarbase | hsa-miR-21-5p   | ST6GAL1 | 6480 | ENSG00000073849 | 18591254 | validated |
| mirtarbase | hsa-miR-192-5p  | STIL    | 6491 | ENSG00000123473 | 19074876 | validated |
| mirtarbase | hsa-miR-106b-5p | SKI     | 6497 | ENSG00000157933 | 22473208 | validated |
| mirtarbase | hsa-miR-15b-5p  | SKI     | 6497 | ENSG00000157933 | 22473208 | validated |
| mirtarbase | hsa-miR-106b-5p | SKIL    | 6498 | ENSG00000136603 | 24398324 | validated |
| mirtarbase | hsa-miR-222-3p  | SKIV2L  | 6499 | ENSG00000223493 | 23622248 | validated |
| mirtarbase | hsa-miR-21-5p   | SKP2    | 6502 | ENSG00000145604 | 18591254 | validated |
| mirtarbase | hsa-miR-192-5p  | SLC1A4  | 6509 | ENSG00000115902 | 19074876 | validated |
| mirtarbase | hsa-miR-15b-5p  | SLC1A5  | 6510 | ENSG00000105281 | 23622248 | validated |
| mirtarbase | hsa-miR-106b-5p | SLC1A5  | 6510 | ENSG00000105281 | 23313552 | validated |
| mirtarbase | hsa-miR-15b-5p  | SLC2A3  | 6515 | ENSG00000059804 | 23446348 | validated |
| mirtarbase | hsa-miR-106b-5p | SLC2A4  | 6517 | ENSG00000181856 | 27165190 | validated |
| mirtarbase | hsa-miR-21-5p   | SLC5A3  | 6526 | ENSG00000198743 | 18591254 | validated |
| mirtarbase | hsa-miR-106b-5p | SLC5A3  | 6526 | ENSG00000198743 | 21572407 | validated |
| mirtarbase | hsa-miR-106b-5p | SLC6A4  | 6532 | ENSG00000108576 | 23313552 | validated |
| mirtarbase | hsa-miR-181a-5p | SLC7A1  | 6541 | ENSG00000139514 | 22473208 | validated |
| mirtarbase | hsa-miR-192-5p  | SLC7A2  | 6542 | ENSG00000003989 | 19074876 | validated |
| mirtarbase | hsa-miR-144-3p  | SLC7A2  | 6542 | ENSG00000003989 | 21572407 | validated |
| mirtarbase | hsa-miR-582-5p  | SLC7A2  | 6542 | ENSG00000003989 | 21572407 | validated |
| mirtarbase | hsa-miR-106b-5p | SLC9A1  | 6548 | ENSG00000090020 | 23622248 | validated |
| mirtarbase | hsa-miR-15b-5p  | SLC9A1  | 6548 | ENSG00000090020 | 22473208 | validated |
| mirtarbase | hsa-miR-192-5p  | SLC9A5  | 6553 | ENSG00000135740 | 19074876 | validated |
| mirtarbase | hsa-miR-181a-5p | SLCO2A1 | 6578 | ENSG00000174640 | 17612493 | validated |
| mirtarbase | hsa-miR-181a-5p | SNAI2   | 6591 | ENSG00000019549 | 17612493 | validated |
| mirtarbase | hsa-miR-192-5p  | SMARCA2 | 6595 | ENSG00000080503 | 19074876 | validated |
| mirtarbase | hsa-miR-21-5p   | SMARCA4 | 6597 | ENSG00000127616 | 21317927 | validated |
| mirtarbase | hsa-miR-222-3p  | SMARCA4 | 6597 | ENSG00000127616 | 23622248 | validated |
| mirtarbase | hsa-miR-192-5p  | SMARCB1 | 6598 | ENSG00000099956 | 19074876 | validated |
| mirtarbase | hsa-miR-21-5p   | SMN2    | 6606 | ENSG00000273772 | 23657402 | validated |
| mirtarbase | hsa-miR-21-5p   | SMN1    | 6606 | ENSG00000275349 | 23657402 | validated |
| mirtarbase | hsa-miR-15b-5p  | SNCG    | 6623 | ENSG00000173267 | 26701625 | validated |
| mirtarbase | hsa-miR-326     | FSCN1   | 6624 | ENSG00000075618 | 26359764 | validated |
| mirtarbase | hsa-miR-15b-5p  | SNRPB2  | 6629 | ENSG00000125870 | 24398324 | validated |
| mirtarbase | hsa-miR-192-5p  | SNRPD1  | 6632 | ENSG00000167088 | 19074876 | validated |
| mirtarbase | hsa-miR-301a-3p | SNTB1   | 6641 | ENSG00000172164 | 23592263 | validated |
| mirtarbase | hsa-miR-15b-5p  | SNTB2   | 6645 | ENSG00000260873 | 22012620 | validated |
| mirtarbase | hsa-miR-106b-5p | SNTB2   | 6645 | ENSG00000260873 | 22473208 | validated |
| mirtarbase | hsa-miR-301a-3p | SNTB2   | 6645 | ENSG00000260873 | 23824327 | validated |
| mirtarbase | hsa-miR-192-5p  | SOAT1   | 6646 | ENSG00000057252 | 19074876 | validated |
| mirtarbase | hsa-miR-212-3p  | SOD2    | 6648 | ENSG00000112096 | 23583431 | validated |
| mirtarbase | hsa-miR-106b-5p | SOD2    | 6648 | ENSG00000112096 | 22473208 | validated |
| mirtarbase | hsa-miR-505-3p  | SOD2    | 6648 | ENSG00000112096 | 23313552 | validated |

|            |                 |         |      |                 |          |           |
|------------|-----------------|---------|------|-----------------|----------|-----------|
| mirtarbase | hsa-miR-21-5p   | SOD3    | 6649 | ENSG00000109610 | 22836756 | validated |
| mirtarbase | hsa-miR-106b-5p | CAPN15  | 6650 | ENSG00000103326 | 23592263 | validated |
| mirtarbase | hsa-miR-18a-5p  | SON     | 6651 | ENSG00000159140 | 20371350 | validated |
| mirtarbase | hsa-miR-222-3p  | SON     | 6651 | ENSG00000159140 | 23622248 | validated |
| mirtarbase | hsa-miR-106b-5p | SON     | 6651 | ENSG00000159140 | 27418678 | validated |
| mirtarbase | hsa-miR-21-5p   | SOX2    | 6657 | ENSG00000181449 | 18591254 | validated |
| mirtarbase | hsa-miR-106b-5p | SOX4    | 6659 | ENSG00000124766 | 23592263 | validated |
| mirtarbase | hsa-miR-301a-3p | SOX4    | 6659 | ENSG00000124766 | 23592263 | validated |
| mirtarbase | hsa-miR-212-3p  | SOX4    | 6659 | ENSG00000124766 | 26377202 | validated |
| mirtarbase | hsa-miR-181a-5p | SOX5    | 6660 | ENSG00000134532 | 22942087 | validated |
| mirtarbase | hsa-miR-505-3p  | SOX11   | 6664 | ENSG00000176887 | 23446348 | validated |
| mirtarbase | hsa-miR-212-3p  | SOX11   | 6664 | ENSG00000176887 | 25766675 | validated |
| mirtarbase | hsa-miR-296-5p  | SOX12   | 6666 | ENSG00000177732 | 23592263 | validated |
| mirtarbase | hsa-miR-18a-5p  | SOX12   | 6666 | ENSG00000177732 | 23313552 | validated |
| mirtarbase | hsa-miR-21-5p   | SP1     | 6667 | ENSG00000185591 | 22034194 | validated |
| mirtarbase | hsa-miR-296-5p  | SP1     | 6667 | ENSG00000185591 | 23592263 | validated |
| mirtarbase | hsa-miR-326     | SP1     | 6667 | ENSG00000185591 | 27460077 | validated |
| mirtarbase | hsa-miR-106b-5p | SP2     | 6668 | ENSG00000167182 | 27418678 | validated |
| mirtarbase | hsa-miR-192-5p  | SP4     | 6671 | ENSG00000105866 | 19074876 | validated |
| mirtarbase | hsa-miR-106b-5p | SP4     | 6671 | ENSG00000105866 | 23446348 | validated |
| mirtarbase | hsa-miR-18a-5p  | SP100   | 6672 | ENSG00000067066 | 23592263 | validated |
| mirtarbase | hsa-miR-106b-5p | SPAG1   | 6674 | ENSG00000104450 | 17242205 | validated |
| mirtarbase | hsa-miR-582-5p  | SPAG1   | 6674 | ENSG00000104450 | 20371350 | validated |
| mirtarbase | hsa-miR-144-3p  | SPAG1   | 6674 | ENSG00000104450 | 20371350 | validated |
| mirtarbase | hsa-miR-192-5p  | SPARC   | 6678 | ENSG00000113140 | 16822819 | validated |
| mirtarbase | hsa-miR-106b-5p | SPIB    | 6689 | ENSG00000269404 | 23824327 | validated |
| mirtarbase | hsa-miR-192-5p  | SPTBN1  | 6711 | ENSG00000115306 | 19074876 | validated |
| mirtarbase | hsa-miR-222-3p  | SPTBN2  | 6712 | ENSG00000173898 | 23622248 | validated |
| mirtarbase | hsa-miR-192-5p  | SRD5A1  | 6715 | ENSG00000145545 | 19074876 | validated |
| mirtarbase | hsa-miR-582-5p  | SREBF2  | 6721 | ENSG00000198911 | 23592263 | validated |
| mirtarbase | hsa-miR-15b-5p  | SRPK1   | 6732 | ENSG00000096063 | 22473208 | validated |
| mirtarbase | hsa-miR-181a-5p | SRPK2   | 6733 | ENSG00000135250 | 17612493 | validated |
| mirtarbase | hsa-miR-21-5p   | SRPK2   | 6733 | ENSG00000135250 | 18591254 | validated |
| mirtarbase | hsa-miR-15b-5p  | SRPRA   | 6734 | ENSG00000182934 | 22473208 | validated |
| mirtarbase | hsa-miR-301a-3p | RO60    | 6738 | ENSG00000116747 | 20371350 | validated |
| mirtarbase | hsa-miR-21-5p   | ITPRID2 | 6744 | ENSG00000138434 | 18591254 | validated |
| mirtarbase | hsa-miR-15b-5p  | SSRP1   | 6749 | ENSG00000149136 | 22473208 | validated |
| mirtarbase | hsa-miR-301a-3p | SSTR2   | 6752 | ENSG00000180616 | 23824327 | validated |
| mirtarbase | hsa-miR-192-5p  | SSTR2   | 6752 | ENSG00000180616 | 27418678 | validated |
| mirtarbase | hsa-miR-582-3p  | SSX5    | 6758 | ENSG00000165583 | 23824327 | validated |
| mirtarbase | hsa-miR-192-5p  | SS18    | 6760 | ENSG00000141380 | 19074876 | validated |
| mirtarbase | hsa-miR-222-3p  | SS18    | 6760 | ENSG00000141380 | 23622248 | validated |
| mirtarbase | hsa-miR-106b-5p | STAT3   | 6774 | ENSG00000168610 | 25307786 | validated |
| mirtarbase | hsa-miR-181a-5p | STAT3   | 6774 | ENSG00000168610 | 24329418 | validated |
| mirtarbase | hsa-miR-181a-5p | HSPA13  | 6782 | ENSG00000155304 | 20371350 | validated |
| mirtarbase | hsa-miR-144-3p  | HSPA13  | 6782 | ENSG00000155304 | 20371350 | validated |
| mirtarbase | hsa-miR-21-5p   | ELOVL4  | 6785 | ENSG00000118402 | 18591254 | validated |
| mirtarbase | hsa-miR-192-5p  | STK3    | 6788 | ENSG00000104375 | 19074876 | validated |
| mirtarbase | hsa-miR-18a-5p  | STK4    | 6789 | ENSG00000101109 | 24752237 | validated |
| mirtarbase | hsa-miR-222-3p  | CDKL5   | 6792 | ENSG00000008086 | 23622248 | validated |
| mirtarbase | hsa-miR-106b-5p | STX4    | 6810 | ENSG00000103496 | 23313552 | validated |
| mirtarbase | hsa-miR-15b-5p  | STXBP1  | 6812 | ENSG00000136854 | 23622248 | validated |
| mirtarbase | hsa-miR-15b-5p  | STXBP3  | 6814 | ENSG00000116266 | 22473208 | validated |
| mirtarbase | hsa-miR-582-5p  | STYX    | 6815 | ENSG00000198252 | 23592263 | validated |
| mirtarbase | hsa-miR-582-3p  | SURF4   | 6836 | ENSG00000148248 | 20371350 | validated |
| mirtarbase | hsa-miR-192-5p  | MED22   | 6837 | ENSG00000148297 | 19074876 | validated |
| mirtarbase | hsa-miR-296-5p  | VAMP1   | 6843 | ENSG00000139190 | 23592263 | validated |
| mirtarbase | hsa-miR-18a-5p  | SYPL1   | 6856 | ENSG00000008282 | 20371350 | validated |
| mirtarbase | hsa-miR-15b-5p  | SYPL1   | 6856 | ENSG00000008282 | 24398324 | validated |
| mirtarbase | hsa-miR-106b-5p | SYT4    | 6860 | ENSG00000132872 | 17242205 | validated |
| mirtarbase | hsa-miR-505-3p  | SYT4    | 6860 | ENSG00000132872 | 22012620 | validated |
| mirtarbase | hsa-miR-181a-5p | ADAM17  | 6868 | ENSG00000151694 | 23313552 | validated |
| mirtarbase | hsa-miR-21-5p   | TAF1    | 6872 | ENSG00000147133 | 18591254 | validated |
| mirtarbase | hsa-miR-181a-5p | TAF2    | 6873 | ENSG00000064313 | 17612493 | validated |
| mirtarbase | hsa-miR-21-5p   | TAF5    | 6877 | ENSG00000148835 | 18591254 | validated |
| mirtarbase | hsa-miR-505-3p  | TAF9    | 6880 | ENSG00000276463 | 23622248 | validated |
| mirtarbase | hsa-miR-15b-5p  | TAF13   | 6884 | ENSG00000197780 | 21572407 | validated |
| mirtarbase | hsa-miR-144-3p  | TAF13   | 6884 | ENSG00000197780 | 27292025 | validated |
| mirtarbase | hsa-miR-15b-5p  | MAP3K7  | 6885 | ENSG00000135341 | 20371350 | validated |
| mirtarbase | hsa-miR-21-5p   | TAP1    | 6890 | ENSG00000227816 | 25327529 | validated |
| mirtarbase | hsa-miR-15b-5p  | TARBP2  | 6895 | ENSG00000139546 | 21572407 | validated |

|            |                 |         |      |                 |          |           |
|------------|-----------------|---------|------|-----------------|----------|-----------|
| mirTarbase | hsa-miR-192-5p  | TBL1X   | 6907 | ENSG00000101849 | 19074876 | validated |
| mirTarbase | hsa-miR-18a-5p  | TCEA2   | 6919 | ENSG00000171703 | 23622248 | validated |
| mirTarbase | hsa-miR-212-3p  | ELOC    | 6921 | ENSG00000154582 | 24398324 | validated |
| mirTarbase | hsa-miR-106b-5p | ELOC    | 6921 | ENSG00000154582 | 23824327 | validated |
| mirTarbase | hsa-miR-222-3p  | ELOB    | 6923 | ENSG00000103363 | 23622248 | validated |
| mirTarbase | hsa-miR-192-5p  | ELOA    | 6924 | ENSG00000011007 | 19074876 | validated |
| mirTarbase | hsa-miR-106b-5p | TCF4    | 6925 | ENSG00000196628 | 22473208 | validated |
| mirTarbase | hsa-miR-181a-5p | TCF4    | 6925 | ENSG00000196628 | 28086904 | validated |
| mirTarbase | hsa-miR-15b-5p  | HNF1A   | 6927 | ENSG00000135100 | 24705650 | validated |
| mirTarbase | hsa-miR-192-5p  | HNF1B   | 6928 | ENSG00000275410 | 19074876 | validated |
| mirTarbase | hsa-miR-15b-5p  | TCF3    | 6929 | ENSG00000071564 | 22473208 | validated |
| mirTarbase | hsa-miR-192-5p  | TCF7    | 6932 | ENSG00000081059 | 19074876 | validated |
| mirTarbase | hsa-miR-106b-5p | TCF7L2  | 6934 | ENSG00000148737 | 21572407 | validated |
| mirTarbase | hsa-miR-301a-3p | TCF7L2  | 6934 | ENSG00000148737 | 21572407 | validated |
| mirTarbase | hsa-miR-505-3p  | TCF7L2  | 6934 | ENSG00000148737 | 23824327 | validated |
| mirTarbase | hsa-miR-144-3p  | ZEB1    | 6935 | ENSG00000148516 | 27785072 | validated |
| mirTarbase | hsa-miR-21-5p   | TCF21   | 6943 | ENSG00000118526 | 23206776 | validated |
| mirTarbase | hsa-miR-181a-5p | TCF21   | 6943 | ENSG00000118526 | 17612493 | validated |
| mirTarbase | hsa-miR-222-3p  | TCOF1   | 6949 | ENSG00000070814 | 23622248 | validated |
| mirTarbase | hsa-miR-15b-5p  | TCP1    | 6950 | ENSG00000120438 | 23622248 | validated |
| mirTarbase | hsa-miR-18a-5p  | TCP1    | 6950 | ENSG00000120438 | 23622248 | validated |
| mirTarbase | hsa-miR-15b-5p  | PPP1R11 | 6992 | ENSG00000204619 | 23313552 | validated |
| mirTarbase | hsa-miR-326     | DYNLT1  | 6993 | ENSG00000146425 | 23622248 | validated |
| mirTarbase | hsa-miR-192-5p  | TDG     | 6996 | ENSG00000139372 | 19074876 | validated |
| mirTarbase | hsa-miR-181a-5p | TEAD4   | 7004 | ENSG00000197905 | 23622248 | validated |
| mirTarbase | hsa-miR-181a-5p | TEF     | 7008 | ENSG00000167074 | 23313552 | validated |
| mirTarbase | hsa-miR-106b-5p | TMBIM6  | 7009 | ENSG00000139644 | 22473208 | validated |
| mirTarbase | hsa-miR-144-3p  | TMBIM6  | 7009 | ENSG00000139644 | 23446348 | validated |
| mirTarbase | hsa-miR-15b-5p  | TERF2   | 7014 | ENSG00000132604 | 23622248 | validated |
| mirTarbase | hsa-miR-301a-3p | TERF2   | 7014 | ENSG00000132604 | 23824327 | validated |
| mirTarbase | hsa-miR-181a-5p | TERT    | 7015 | ENSG00000164362 | 25444904 | validated |
| mirTarbase | hsa-miR-106b-5p | TFAM    | 7019 | ENSG00000108064 | 23592263 | validated |
| mirTarbase | hsa-miR-15b-5p  | TFAP2A  | 7020 | ENSG00000137203 | 23592263 | validated |
| mirTarbase | hsa-miR-222-3p  | TFAP2A  | 7020 | ENSG00000137203 | 20371350 | validated |
| mirTarbase | hsa-miR-582-5p  | TFAP4   | 7023 | ENSG00000090447 | 21572407 | validated |
| mirTarbase | hsa-miR-144-3p  | TFAP4   | 7023 | ENSG00000090447 | 21572407 | validated |
| mirTarbase | hsa-miR-144-3p  | NR2F2   | 7026 | ENSG00000185551 | 23592263 | validated |
| mirTarbase | hsa-miR-582-5p  | NR2F2   | 7026 | ENSG00000185551 | 23592263 | validated |
| mirTarbase | hsa-miR-181a-5p | TFRC    | 7037 | ENSG00000072274 | 22473208 | validated |
| mirTarbase | hsa-miR-505-3p  | TGFA    | 7039 | ENSG00000163235 | 26832151 | validated |
| mirTarbase | hsa-miR-144-3p  | TGFB1   | 7040 | ENSG00000105329 | 21991303 | validated |
| mirTarbase | hsa-miR-15b-5p  | TGFB1   | 7040 | ENSG00000105329 | 27499071 | validated |
| mirTarbase | hsa-miR-21-5p   | TGFB2   | 7042 | ENSG00000092969 | 18591254 | validated |
| mirTarbase | hsa-miR-21-5p   | TGFBI   | 7045 | ENSG00000120708 | 19136465 | validated |
| mirTarbase | hsa-miR-181a-5p | TGFBR1  | 7046 | ENSG00000106799 | 22942087 | validated |
| mirTarbase | hsa-miR-18a-5p  | TGFBR2  | 7048 | ENSG00000163513 | 20940405 | validated |
| mirTarbase | hsa-miR-106b-5p | TGFBR2  | 7048 | ENSG00000163513 | 22473208 | validated |
| mirTarbase | hsa-miR-301a-3p | TGFBR2  | 7048 | ENSG00000163513 | 22012620 | validated |
| mirTarbase | hsa-miR-582-5p  | TGFBR2  | 7048 | ENSG00000163513 | 23592263 | validated |
| mirTarbase | hsa-miR-505-3p  | TGFBR2  | 7048 | ENSG00000163513 | 19536157 | validated |
| mirTarbase | hsa-miR-181a-5p | TGFBR3  | 7049 | ENSG00000069702 | 20371350 | validated |
| mirTarbase | hsa-miR-582-5p  | TGFBR3  | 7049 | ENSG00000069702 | 21572407 | validated |
| mirTarbase | hsa-miR-144-3p  | TGFBR3  | 7049 | ENSG00000069702 | 21572407 | validated |
| mirTarbase | hsa-miR-15b-5p  | TGFBR3  | 7049 | ENSG00000069702 | 20371350 | validated |
| mirTarbase | hsa-miR-21-5p   | TGIF1   | 7050 | ENSG00000177426 | 19906824 | validated |
| mirTarbase | hsa-miR-192-5p  | THBD    | 7056 | ENSG00000178726 | 19074876 | validated |
| mirTarbase | hsa-miR-192-5p  | THOP1   | 7064 | ENSG00000172009 | 19074876 | validated |
| mirTarbase | hsa-miR-505-3p  | THOP1   | 7064 | ENSG00000172009 | 23622248 | validated |
| mirTarbase | hsa-miR-222-3p  | THOP1   | 7064 | ENSG00000172009 | 23622248 | validated |
| mirTarbase | hsa-miR-18a-5p  | THRA    | 7067 | ENSG00000126351 | 16331254 | validated |
| mirTarbase | hsa-miR-15b-5p  | THRA    | 7067 | ENSG00000126351 | 23622248 | validated |
| mirTarbase | hsa-miR-301a-3p | THRA    | 7067 | ENSG00000126351 | 23592263 | validated |
| mirTarbase | hsa-miR-192-5p  | KLF10   | 7071 | ENSG00000155090 | 19074876 | validated |
| mirTarbase | hsa-miR-106b-5p | KLF10   | 7071 | ENSG00000155090 | 23313552 | validated |
| mirTarbase | hsa-miR-181a-5p | TIAL1   | 7073 | ENSG00000151923 | 20371350 | validated |
| mirTarbase | hsa-miR-21-5p   | TIAM1   | 7074 | ENSG00000156299 | 20826792 | validated |
| mirTarbase | hsa-miR-181a-5p | TIMP1   | 7076 | ENSG00000102265 | 22492871 | validated |
| mirTarbase | hsa-miR-301a-3p | TIMP2   | 7077 | ENSG00000035862 | 26464662 | validated |
| mirTarbase | hsa-miR-505-3p  | TLE3    | 7090 | ENSG00000140332 | 23622248 | validated |
| mirTarbase | hsa-miR-222-3p  | TLE3    | 7090 | ENSG00000140332 | 23622248 | validated |
| mirTarbase | hsa-miR-18a-5p  | TLE3    | 7090 | ENSG00000140332 | 23622248 | validated |

|            |                 |          |      |                 |          |           |
|------------|-----------------|----------|------|-----------------|----------|-----------|
| mirtarbase | hsa-miR-15b-5p  | TLE4     | 7091 | ENSG00000106829 | 22473208 | validated |
| mirtarbase | hsa-miR-15b-5p  | TLL1     | 7092 | ENSG00000038295 | 22100165 | validated |
| mirtarbase | hsa-miR-222-3p  | TLN1     | 7094 | ENSG00000137076 | 23622248 | validated |
| mirtarbase | hsa-miR-106b-5p | TLR2     | 7097 | ENSG00000137462 | 17242205 | validated |
| mirtarbase | hsa-miR-21-5p   | TLR3     | 7098 | ENSG00000164342 | 25327529 | validated |
| mirtarbase | hsa-miR-21-5p   | TLR4     | 7099 | ENSG00000136869 | 18591254 | validated |
| mirtarbase | hsa-miR-106b-5p | TSPAN6   | 7105 | ENSG00000000003 | 23313552 | validated |
| mirtarbase | hsa-miR-144-3p  | TSPAN6   | 7105 | ENSG00000000003 | 21572407 | validated |
| mirtarbase | hsa-miR-181a-5p | GPR137B  | 7107 | ENSG00000077585 | 17612493 | validated |
| mirtarbase | hsa-miR-106b-5p | GPR137B  | 7107 | ENSG00000077585 | 20371350 | validated |
| mirtarbase | hsa-miR-106b-5p | TRAPPC10 | 7109 | ENSG00000160218 | 22473208 | validated |
| mirtarbase | hsa-miR-181a-5p | TMF1     | 7110 | ENSG00000144747 | 22473208 | validated |
| mirtarbase | hsa-miR-192-5p  | TMPO     | 7112 | ENSG00000120802 | 19074876 | validated |
| mirtarbase | hsa-miR-106b-5p | TMPO     | 7112 | ENSG00000120802 | 23622248 | validated |
| mirtarbase | hsa-miR-582-5p  | TNFAIP1  | 7126 | ENSG00000109079 | 23592263 | validated |
| mirtarbase | hsa-miR-106b-5p | TNFAIP1  | 7126 | ENSG00000109079 | 22473208 | validated |
| mirtarbase | hsa-miR-21-5p   | TNFAIP3  | 7128 | ENSG00000118503 | 21131358 | validated |
| mirtarbase | hsa-miR-505-3p  | TNFAIP3  | 7128 | ENSG00000118503 | 21572407 | validated |
| mirtarbase | hsa-miR-18a-5p  | TNFAIP3  | 7128 | ENSG00000118503 | 26783726 | validated |
| mirtarbase | hsa-miR-106b-5p | TNNI1    | 7135 | ENSG00000159173 | 17242205 | validated |
| mirtarbase | hsa-miR-192-5p  | TOP1     | 7150 | ENSG00000198900 | 19074876 | validated |
| mirtarbase | hsa-miR-192-5p  | TOP1P2   | 7152 |                 | 19074876 | validated |
| mirtarbase | hsa-miR-21-5p   | TOP2A    | 7153 | ENSG00000131747 | 18591254 | validated |
| mirtarbase | hsa-miR-222-3p  | TOP3A    | 7156 | ENSG00000177302 | 23622248 | validated |
| mirtarbase | hsa-miR-222-3p  | TP53     | 7157 | ENSG00000141510 | 21226887 | validated |
| mirtarbase | hsa-miR-18a-5p  | TP53     | 7157 | ENSG00000141510 | 24955218 | validated |
| mirtarbase | hsa-miR-106b-5p | TP53     | 7157 | ENSG00000141510 | 24955218 | validated |
| mirtarbase | hsa-miR-505-3p  | TP53BP1  | 7158 | ENSG00000067369 | 23622248 | validated |
| mirtarbase | hsa-miR-222-3p  | TP53BP2  | 7159 | ENSG00000143514 | 22815788 | validated |
| mirtarbase | hsa-miR-505-3p  | TPBG     | 7162 | ENSG00000146242 | 23622248 | validated |
| mirtarbase | hsa-miR-505-3p  | TPD52    | 7163 | ENSG00000076554 | 23622248 | validated |
| mirtarbase | hsa-miR-15b-5p  | TPD52    | 7163 | ENSG00000076554 | 23622248 | validated |
| mirtarbase | hsa-miR-582-5p  | TPI1     | 7167 | ENSG00000111669 | 26701625 | validated |
| mirtarbase | hsa-miR-15b-5p  | TPM2     | 7169 | ENSG00000198467 | 23592263 | validated |
| mirtarbase | hsa-miR-15b-5p  | TPM3     | 7170 | ENSG00000143549 | 21572407 | validated |
| mirtarbase | hsa-miR-192-5p  | TPM4     | 7171 | ENSG00000167460 | 19074876 | validated |
| mirtarbase | hsa-miR-106b-5p | TPM4     | 7171 | ENSG00000167460 | 23592263 | validated |
| mirtarbase | hsa-miR-582-5p  | TPM4     | 7171 | ENSG00000167460 | 23592263 | validated |
| mirtarbase | hsa-miR-21-5p   | NR2C2    | 7182 | ENSG00000177463 | 18591254 | validated |
| mirtarbase | hsa-miR-106b-5p | NR2C2    | 7182 | ENSG00000177463 | 22473208 | validated |
| mirtarbase | hsa-miR-15b-5p  | NR2C2    | 7182 | ENSG00000177463 | 22473208 | validated |
| mirtarbase | hsa-miR-192-5p  | HSP90B1  | 7184 | ENSG00000166598 | 16822819 | validated |
| mirtarbase | hsa-miR-181a-5p | HSP90B1  | 7184 | ENSG00000166598 | 23446348 | validated |
| mirtarbase | hsa-miR-582-5p  | HSP90B1  | 7184 | ENSG00000166598 | 26701625 | validated |
| mirtarbase | hsa-miR-192-5p  | TRPC1    | 7220 | ENSG00000144935 | 19074876 | validated |
| mirtarbase | hsa-miR-301a-3p | TRPC3    | 7222 | ENSG00000138741 | 21572407 | validated |
| mirtarbase | hsa-miR-222-3p  | TRPS1    | 7227 | ENSG00000104447 | 21673316 | validated |
| mirtarbase | hsa-miR-582-5p  | TSN      | 7247 | ENSG00000211460 | 23592263 | validated |
| mirtarbase | hsa-miR-106b-5p | TSC1     | 7248 | ENSG00000165699 | 23622248 | validated |
| mirtarbase | hsa-miR-106b-5p | TSG101   | 7251 | ENSG00000074319 | 22473208 | validated |
| mirtarbase | hsa-miR-181a-5p | TSG101   | 7251 | ENSG00000074319 | 22473208 | validated |
| mirtarbase | hsa-miR-181a-5p | TSHR     | 7253 | ENSG00000165409 | 17612493 | validated |
| mirtarbase | hsa-miR-21-5p   | TSNAX    | 7257 | ENSG00000116918 | 18591254 | validated |
| mirtarbase | hsa-miR-144-3p  | TSPYL1   | 7259 | ENSG00000189241 | 24398324 | validated |
| mirtarbase | hsa-miR-15b-5p  | TTC1     | 7265 | ENSG00000113312 | 23622248 | validated |
| mirtarbase | hsa-miR-181a-5p | DNAJC7   | 7266 | ENSG00000168259 | 17612493 | validated |
| mirtarbase | hsa-miR-192-5p  | TTK      | 7272 | ENSG00000112742 | 19074876 | validated |
| mirtarbase | hsa-miR-144-3p  | TTN      | 7273 | ENSG00000155657 | 24453045 | validated |
| mirtarbase | hsa-miR-192-5p  | TTPA     | 7274 | ENSG00000137561 | 19074876 | validated |
| mirtarbase | hsa-miR-15b-5p  | TUBB2A   | 7280 | ENSG00000137267 | 20371350 | validated |
| mirtarbase | hsa-miR-505-3p  | TUBB2A   | 7280 | ENSG00000137267 | 20371350 | validated |
| mirtarbase | hsa-miR-181a-5p | TUBB2A   | 7280 | ENSG00000137267 | 20371350 | validated |
| mirtarbase | hsa-miR-106b-5p | TWIST1   | 7291 | ENSG00000122691 | 24002805 | validated |
| mirtarbase | hsa-miR-181a-5p | TWIST1   | 7291 | ENSG00000122691 | 24148247 | validated |
| mirtarbase | hsa-miR-106b-5p | TXK      | 7294 | ENSG00000074966 | 22012620 | validated |
| mirtarbase | hsa-miR-222-3p  | TXN      | 7295 | ENSG00000136810 | 23622248 | validated |
| mirtarbase | hsa-miR-505-3p  | TXNRD1   | 7296 | ENSG00000198431 | 20371350 | validated |
| mirtarbase | hsa-miR-301a-3p | UBB      | 7314 | ENSG00000170315 | 23592263 | validated |
| mirtarbase | hsa-miR-18a-5p  | UBC      | 7316 | ENSG00000150991 | 23622248 | validated |
| mirtarbase | hsa-miR-106b-5p | UBC      | 7316 | ENSG00000150991 | 22473208 | validated |
| mirtarbase | hsa-miR-301a-3p | UBC      | 7316 | ENSG00000150991 | 26701625 | validated |



|            |                 |         |      |                 |          |           |
|------------|-----------------|---------|------|-----------------|----------|-----------|
| mirtarbase | hsa-miR-222-3p  | UBA1    | 7317 | ENSG00000130985 | 23622248 | validated |
| mirtarbase | hsa-miR-144-3p  | UBE2A   | 7319 | ENSG00000077721 | 23446348 | validated |
| mirtarbase | hsa-miR-192-5p  | UBE2D1  | 7321 | ENSG00000072401 | 19074876 | validated |
| mirtarbase | hsa-miR-192-5p  | UBE2D2  | 7322 | ENSG00000131508 | 19074876 | validated |
| mirtarbase | hsa-miR-301a-3p | UBE2D2  | 7322 | ENSG00000131508 | 21572407 | validated |
| mirtarbase | hsa-miR-301a-3p | UBE2D3  | 7323 | ENSG00000109332 | 23446348 | validated |
| mirtarbase | hsa-miR-505-3p  | UBE2D3  | 7323 | ENSG00000109332 | 23446348 | validated |
| mirtarbase | hsa-miR-181a-5p | UBE2G1  | 7326 | ENSG00000132388 | 20371350 | validated |
| mirtarbase | hsa-miR-15b-5p  | UBE2H   | 7328 | ENSG00000186591 | 20371350 | validated |
| mirtarbase | hsa-miR-222-3p  | UBE2N   | 7334 | ENSG00000177889 | 20371350 | validated |
| mirtarbase | hsa-miR-21-5p   | UBE2N   | 7334 | ENSG00000177889 | 25327529 | validated |
| mirtarbase | hsa-miR-15b-5p  | UBE2V1  | 7335 | ENSG00000244687 | 23592263 | validated |
| mirtarbase | hsa-miR-192-5p  | UBE2V2  | 7336 | ENSG00000169139 | 19074876 | validated |
| mirtarbase | hsa-miR-106b-5p | UBE2V2  | 7336 | ENSG00000169139 | 23313552 | validated |
| mirtarbase | hsa-miR-181a-5p | UCHL1   | 7345 | ENSG00000154277 | 23622248 | validated |
| mirtarbase | hsa-miR-222-3p  | SLC35A2 | 7355 | ENSG00000102100 | 23622248 | validated |
| mirtarbase | hsa-miR-106b-5p | UGCG    | 7357 | ENSG00000148154 | 23592263 | validated |
| mirtarbase | hsa-miR-106b-5p | UGP2    | 7360 | ENSG00000169764 | 23622248 | validated |
| mirtarbase | hsa-miR-15b-5p  | UGT2B4  | 7363 | ENSG00000156096 | 21572407 | validated |
| mirtarbase | hsa-miR-192-5p  | UGT8    | 7368 | ENSG00000174607 | 19074876 | validated |
| mirtarbase | hsa-miR-192-5p  | UNG     | 7374 | ENSG00000076248 | 19074876 | validated |
| mirtarbase | hsa-miR-192-5p  | UPP1    | 7378 | ENSG00000183696 | 19074876 | validated |
| mirtarbase | hsa-miR-301a-3p | UQCRB   | 7381 | ENSG00000156467 | 22100165 | validated |
| mirtarbase | hsa-miR-21-5p   | UQCRB   | 7381 | ENSG00000156467 | 23446348 | validated |
| mirtarbase | hsa-miR-192-5p  | UQCRC2  | 7385 | ENSG00000140740 | 19074876 | validated |
| mirtarbase | hsa-miR-106b-5p | UQCRFS1 | 7386 | ENSG00000169021 | 23622248 | validated |
| mirtarbase | hsa-miR-505-3p  | UQCRFS1 | 7386 | ENSG00000169021 | 20371350 | validated |
| mirtarbase | hsa-miR-222-3p  | UROD    | 7389 | ENSG00000126088 | 23622248 | validated |
| mirtarbase | hsa-miR-192-5p  | USP1    | 7398 | ENSG00000162607 | 19074876 | validated |
| mirtarbase | hsa-miR-21-5p   | UTRN    | 7402 | ENSG00000152818 | 18591254 | validated |
| mirtarbase | hsa-miR-505-3p  | UTRN    | 7402 | ENSG00000152818 | 23622248 | validated |
| mirtarbase | hsa-miR-192-5p  | UVRAG   | 7405 | ENSG00000198382 | 19074876 | validated |
| mirtarbase | hsa-miR-301a-3p | UVRAG   | 7405 | ENSG00000198382 | 26990571 | validated |
| mirtarbase | hsa-miR-15b-5p  | VAV2    | 7410 | ENSG00000160293 | 20371350 | validated |
| mirtarbase | hsa-miR-505-3p  | VBP1    | 7411 | ENSG00000155959 | 23313552 | validated |
| mirtarbase | hsa-miR-181a-5p | VCAM1   | 7412 | ENSG00000162692 | 19536157 | validated |
| mirtarbase | hsa-miR-222-3p  | VCL     | 7414 | ENSG00000035403 | 23622248 | validated |
| mirtarbase | hsa-miR-15b-5p  | VCL     | 7414 | ENSG00000035403 | 22473208 | validated |
| mirtarbase | hsa-miR-222-3p  | VCP     | 7415 | ENSG00000165280 | 23622248 | validated |
| mirtarbase | hsa-miR-18a-5p  | VCP     | 7415 | ENSG00000165280 | 23592263 | validated |
| mirtarbase | hsa-miR-106b-5p | VDAC1   | 7416 | ENSG00000213585 | 22473208 | validated |
| mirtarbase | hsa-miR-15b-5p  | VDAC2   | 7417 | ENSG00000165637 | 23622248 | validated |
| mirtarbase | hsa-miR-15b-5p  | VEGFA   | 7422 | ENSG00000112715 | 18320040 | validated |
| mirtarbase | hsa-miR-21-5p   | VEGFA   | 7422 | ENSG00000112715 | 19435867 | validated |
| mirtarbase | hsa-miR-181a-5p | VEGFA   | 7422 | ENSG00000112715 | 25106798 | validated |
| mirtarbase | hsa-miR-296-5p  | VEGFA   | 7422 | ENSG00000112715 | 26500043 | validated |
| mirtarbase | hsa-miR-21-5p   | VHL     | 7428 | ENSG00000134086 | 24012640 | validated |
| mirtarbase | hsa-miR-18a-5p  | EZR     | 7430 | ENSG00000092820 | 20371350 | validated |
| mirtarbase | hsa-miR-222-3p  | EZR     | 7430 | ENSG00000092820 | 23622248 | validated |
| mirtarbase | hsa-miR-192-5p  | TRPV1   | 7442 | ENSG00000196689 | 19074876 | validated |
| mirtarbase | hsa-miR-106b-5p | EIF4H   | 7458 | ENSG00000106682 | 22012620 | validated |
| mirtarbase | hsa-miR-21-5p   | CORO2A  | 7464 | ENSG00000106789 | 19342589 | validated |
| mirtarbase | hsa-miR-106b-5p | WEE1    | 7465 | ENSG00000166483 | 21283765 | validated |
| mirtarbase | hsa-miR-15b-5p  | WEE1    | 7465 | ENSG00000166483 | 21572407 | validated |
| mirtarbase | hsa-miR-21-5p   | WFS1    | 7466 | ENSG00000109501 | 19253296 | validated |
| mirtarbase | hsa-miR-192-5p  | NSD2    | 7468 | ENSG00000109685 | 19074876 | validated |
| mirtarbase | hsa-miR-21-5p   | NSD2    | 7468 | ENSG00000109685 | 18591254 | validated |
| mirtarbase | hsa-miR-106b-5p | NSD2    | 7468 | ENSG00000109685 | 22473208 | validated |
| mirtarbase | hsa-miR-181a-5p | NSD2    | 7468 | ENSG00000109685 | 23592263 | validated |
| mirtarbase | hsa-miR-181a-5p | WNT2    | 7472 | ENSG00000105989 | 17612493 | validated |
| mirtarbase | hsa-miR-192-5p  | WNT3    | 7473 | ENSG00000277641 | 19074876 | validated |
| mirtarbase | hsa-miR-21-5p   | WNT5A   | 7474 | ENSG00000114251 | 18591254 | validated |
| mirtarbase | hsa-miR-144-3p  | WNT7A   | 7476 | ENSG00000154764 | 23824327 | validated |
| mirtarbase | hsa-miR-144-3p  | WRN     | 7486 | ENSG00000165392 | 23592263 | validated |
| mirtarbase | hsa-miR-212-3p  | WT1     | 7490 | ENSG00000184937 | 17875710 | validated |
| mirtarbase | hsa-miR-192-5p  | WT1     | 7490 | ENSG00000184937 | 22012620 | validated |
| mirtarbase | hsa-miR-144-3p  | XIST    | 7503 |                 | 28059474 | validated |
| mirtarbase | hsa-miR-192-5p  | XK      | 7504 | ENSG00000047597 | 19074876 | validated |
| mirtarbase | hsa-miR-192-5p  | XPA     | 7507 | ENSG00000136936 | 16822819 | validated |
| mirtarbase | hsa-miR-192-5p  | XPO1    | 7514 | ENSG00000082898 | 19074876 | validated |
| mirtarbase | hsa-miR-106b-5p | YES1    | 7525 | ENSG00000176105 | 23622248 | validated |

|            |                 |         |      |                 |          |           |
|------------|-----------------|---------|------|-----------------|----------|-----------|
| mirTarbase | hsa-miR-301a-3p | YY1     | 7528 | ENSG00000100811 | 23592263 | validated |
| mirTarbase | hsa-miR-222-3p  | YWHAG   | 7532 | ENSG00000170027 | 23622248 | validated |
| mirTarbase | hsa-miR-15b-5p  | YWHAH   | 7533 | ENSG00000128245 | 20371350 | validated |
| mirTarbase | hsa-miR-106b-5p | YWHAZ   | 7534 | ENSG00000164924 | 21572407 | validated |
| mirTarbase | hsa-miR-192-5p  | ZBTB14  | 7541 | ENSG00000198081 | 19074876 | validated |
| mirTarbase | hsa-miR-144-3p  | ZFX     | 7543 | ENSG00000005889 | 22955854 | validated |
| mirTarbase | hsa-miR-18a-5p  | ZNF711  | 7552 | ENSG00000147180 | 20371350 | validated |
| mirTarbase | hsa-miR-301a-3p | ZNF711  | 7552 | ENSG00000147180 | 23446348 | validated |
| mirTarbase | hsa-miR-212-3p  | ZNF711  | 7552 | ENSG00000147180 | 20371350 | validated |
| mirTarbase | hsa-miR-106b-5p | ZNF7    | 7553 | ENSG00000147789 | 23313552 | validated |
| mirTarbase | hsa-miR-181a-5p | ZNF12   | 7559 | ENSG00000164631 | 17612493 | validated |
| mirTarbase | hsa-miR-106b-5p | ZNF12   | 7559 | ENSG00000164631 | 22473208 | validated |
| mirTarbase | hsa-miR-301a-3p | ZNF12   | 7559 | ENSG00000164631 | 24398324 | validated |
| mirTarbase | hsa-miR-18a-5p  | ZNF708  | 7562 | ENSG00000182141 | 20371350 | validated |
| mirTarbase | hsa-miR-222-3p  | ZNF708  | 7562 | ENSG00000182141 | 23622248 | validated |
| mirTarbase | hsa-miR-181a-5p | ZNF23   | 7571 | ENSG00000167377 | 20371350 | validated |
| mirTarbase | hsa-miR-301a-3p | ZNF24   | 7572 | ENSG00000172466 | 23592263 | validated |
| mirTarbase | hsa-miR-18a-5p  | ZNF33A  | 7581 | ENSG00000189180 | 20371350 | validated |
| mirTarbase | hsa-miR-181a-5p | ZNF35   | 7584 | ENSG00000169981 | 20371350 | validated |
| mirTarbase | hsa-miR-21-5p   | ZNF35   | 7584 | ENSG00000169981 | 20371350 | validated |
| mirTarbase | hsa-miR-106b-5p | ZNF35   | 7584 | ENSG00000169981 | 20371350 | validated |
| mirTarbase | hsa-miR-192-5p  | ZNF45   | 7596 | ENSG00000124459 | 19074876 | validated |
| mirTarbase | hsa-miR-106b-5p | ZBTB25  | 7597 | ENSG00000089775 | 23313552 | validated |
| mirTarbase | hsa-miR-106b-5p | ZNF70   | 7621 | ENSG00000187792 | 23592263 | validated |
| mirTarbase | hsa-miR-192-5p  | ZNF85   | 7639 | ENSG00000278091 | 19074876 | validated |
| mirTarbase | hsa-miR-15b-5p  | ZNF91   | 7644 | ENSG00000167232 | 22473208 | validated |
| mirTarbase | hsa-miR-181a-5p | ZNF121  | 7675 | ENSG00000197961 | 22473208 | validated |
| mirTarbase | hsa-miR-582-5p  | ZNF124  | 7678 | ENSG00000196418 | 27292025 | validated |
| mirTarbase | hsa-miR-222-3p  | ZNF131  | 7690 | ENSG00000172262 | 23622248 | validated |
| mirTarbase | hsa-miR-18a-5p  | ZNF132  | 7691 | ENSG00000131849 | 23446348 | validated |
| mirTarbase | hsa-miR-181a-5p | ZNF136  | 7695 | ENSG00000196646 | 22473208 | validated |
| mirTarbase | hsa-miR-21-5p   | PCGF2   | 7703 | ENSG00000277258 | 27542229 | validated |
| mirTarbase | hsa-miR-15b-5p  | ZBTB16  | 7704 | ENSG00000109906 | 20371350 | validated |
| mirTarbase | hsa-miR-181a-5p | ZNF148  | 7707 | ENSG00000163848 | 20371350 | validated |
| mirTarbase | hsa-miR-301a-3p | ZNF154  | 7710 | ENSG00000179909 | 23446348 | validated |
| mirTarbase | hsa-miR-326     | ZNF154  | 7710 | ENSG00000179909 | 19536157 | validated |
| mirTarbase | hsa-miR-192-5p  | ZNF165  | 7718 | ENSG00000197279 | 19074876 | validated |
| mirTarbase | hsa-miR-106b-5p | ZNF174  | 7727 | ENSG00000103343 | 23313552 | validated |
| mirTarbase | hsa-miR-106b-5p | ZNF180  | 7733 | ENSG00000167384 | 23446348 | validated |
| mirTarbase | hsa-miR-192-5p  | ZNF184  | 7738 | ENSG00000096654 | 19074876 | validated |
| mirTarbase | hsa-miR-21-5p   | ZMYM2   | 7750 | ENSG00000121741 | 18591254 | validated |
| mirTarbase | hsa-miR-192-5p  | ZNF200  | 7752 | ENSG00000010539 | 19074876 | validated |
| mirTarbase | hsa-miR-106b-5p | ZNF202  | 7753 | ENSG00000166261 | 23446348 | validated |
| mirTarbase | hsa-miR-21-5p   | ZNF207  | 7756 | ENSG00000010244 | 18591254 | validated |
| mirTarbase | hsa-miR-144-3p  | ZNF207  | 7756 | ENSG00000010244 | 20371350 | validated |
| mirTarbase | hsa-miR-505-3p  | ZNF208  | 7757 | ENSG00000160321 | 23824327 | validated |
| mirTarbase | hsa-miR-192-5p  | ZNF215  | 7762 | ENSG00000149054 | 19074876 | validated |
| mirTarbase | hsa-miR-18a-5p  | ZFAND5  | 7763 | ENSG00000107372 | 20371350 | validated |
| mirTarbase | hsa-miR-15b-5p  | ZFAND5  | 7763 | ENSG00000107372 | 23622248 | validated |
| mirTarbase | hsa-miR-222-3p  | ZFAND5  | 7763 | ENSG00000107372 | 22815788 | validated |
| mirTarbase | hsa-miR-21-5p   | ZNF217  | 7764 | ENSG00000171940 | 18591254 | validated |
| mirTarbase | hsa-miR-15b-5p  | ZNF217  | 7764 | ENSG00000171940 | 23622248 | validated |
| mirTarbase | hsa-miR-582-5p  | ZNF223  | 7766 | ENSG00000178386 | 22012620 | validated |
| mirTarbase | hsa-miR-301a-3p | ZNF224  | 7767 | ENSG00000267680 | 21572407 | validated |
| mirTarbase | hsa-miR-192-5p  | ZNF226  | 7769 | ENSG00000167380 | 19074876 | validated |
| mirTarbase | hsa-miR-192-5p  | ZNF230  | 7773 | ENSG00000159882 | 19074876 | validated |
| mirTarbase | hsa-miR-222-3p  | ZNF236  | 7776 | ENSG00000130856 | 19536157 | validated |
| mirTarbase | hsa-miR-106b-5p | SLC30A1 | 7779 | ENSG00000170385 | 23592263 | validated |
| mirTarbase | hsa-miR-15b-5p  | LUZP1   | 7798 | ENSG00000169641 | 23446348 | validated |
| mirTarbase | hsa-miR-296-5p  | LUZP1   | 7798 | ENSG00000169641 | 23446348 | validated |
| mirTarbase | hsa-miR-144-3p  | PTP4A1  | 7803 | ENSG00000112245 | 23592263 | validated |
| mirTarbase | hsa-miR-106b-5p | PTP4A1  | 7803 | ENSG00000112245 | 23592263 | validated |
| mirTarbase | hsa-miR-192-5p  | LRP8    | 7804 | ENSG00000157193 | 19074876 | validated |
| mirTarbase | hsa-miR-326     | CSDE1   | 7812 | ENSG00000009307 | 23622248 | validated |
| mirTarbase | hsa-miR-106b-5p | CSDE1   | 7812 | ENSG00000009307 | 21572407 | validated |
| mirTarbase | hsa-miR-15b-5p  | CSDE1   | 7812 | ENSG00000009307 | 22473208 | validated |
| mirTarbase | hsa-miR-106b-5p | DAP3    | 7818 | ENSG00000132676 | 23622248 | validated |
| mirTarbase | hsa-miR-15b-5p  | BTG2    | 7832 | ENSG00000159388 | 22473208 | validated |
| mirTarbase | hsa-miR-144-3p  | BTG2    | 7832 | ENSG00000159388 | 24398324 | validated |
| mirTarbase | hsa-miR-106b-5p | BTG2    | 7832 | ENSG00000159388 | 23592263 | validated |
| mirTarbase | hsa-miR-192-5p  | PXDN    | 7837 | ENSG00000130508 | 19074876 | validated |

|            |                 |         |      |                 |          |           |
|------------|-----------------|---------|------|-----------------|----------|-----------|
| mirtarbase | hsa-miR-21-5p   | ALMS1   | 7840 | ENSG00000116127 | 18591254 | validated |
| mirtarbase | hsa-miR-21-5p   | RNF103  | 7844 | ENSG00000239305 | 22473208 | validated |
| mirtarbase | hsa-miR-505-3p  | FZD5    | 7855 | ENSG00000163251 | 22100165 | validated |
| mirtarbase | hsa-miR-21-5p   | SLMAP   | 7871 | ENSG00000163681 | 18591254 | validated |
| mirtarbase | hsa-miR-192-5p  | MANF    | 7873 | ENSG00000145050 | 19074876 | validated |
| mirtarbase | hsa-miR-21-5p   | USP7    | 7874 | ENSG00000187555 | 18591254 | validated |
| mirtarbase | hsa-miR-106b-5p | REEP5   | 7905 | ENSG00000129625 | 22473208 | validated |
| mirtarbase | hsa-miR-192-5p  | DEK     | 7913 | ENSG00000124795 | 19074876 | validated |
| mirtarbase | hsa-miR-192-5p  | ALDH5A1 | 7915 | ENSG00000112294 | 19074876 | validated |
| mirtarbase | hsa-miR-222-3p  | PRRC2A  | 7916 | ENSG00000226618 | 23622248 | validated |
| mirtarbase | hsa-miR-222-3p  | BAG6    | 7917 | ENSG00000233348 | 23622248 | validated |
| mirtarbase | hsa-miR-192-5p  | EPM2A   | 7957 | ENSG00000112425 | 19074876 | validated |
| mirtarbase | hsa-miR-21-5p   | EPM2A   | 7957 | ENSG00000112425 | 18591254 | validated |
| mirtarbase | hsa-miR-15b-5p  | MAFK    | 7975 | ENSG00000198517 | 22473208 | validated |
| mirtarbase | hsa-miR-326     | MAFK    | 7975 | ENSG00000198517 | 26701625 | validated |
| mirtarbase | hsa-miR-181a-5p | TUSC3   | 7991 | ENSG00000104723 | 28288641 | validated |
| mirtarbase | hsa-miR-21-5p   | KAT6A   | 7994 | ENSG00000083168 | 20371350 | validated |
| mirtarbase | hsa-miR-192-5p  | BRD3    | 8019 | ENSG00000169925 | 16822819 | validated |
| mirtarbase | hsa-miR-15b-5p  | NUP214  | 8021 | ENSG00000126883 | 23622248 | validated |
| mirtarbase | hsa-miR-181a-5p | DGS2    | 8026 |                 | 24398324 | validated |
| mirtarbase | hsa-miR-505-3p  | DGS2    | 8026 |                 | 23313552 | validated |
| mirtarbase | hsa-miR-192-5p  | STAM    | 8027 | ENSG00000136738 | 19074876 | validated |
| mirtarbase | hsa-miR-181a-5p | CCDC6   | 8030 | ENSG00000108091 | 17612493 | validated |
| mirtarbase | hsa-miR-106b-5p | CCDC6   | 8030 | ENSG00000108091 | 20371350 | validated |
| mirtarbase | hsa-miR-106b-5p | SHOC2   | 8036 | ENSG00000108061 | 23592263 | validated |
| mirtarbase | hsa-miR-15b-5p  | SHOC2   | 8036 | ENSG00000108061 | 22473208 | validated |
| mirtarbase | hsa-miR-181a-5p | SHOC2   | 8036 | ENSG00000108061 | 22473208 | validated |
| mirtarbase | hsa-miR-192-5p  | CUL5    | 8065 | ENSG00000166266 | 19074876 | validated |
| mirtarbase | hsa-miR-181a-5p | CUL5    | 8065 | ENSG00000166266 | 22473208 | validated |
| mirtarbase | hsa-miR-106b-5p | PTP4A2  | 8073 | ENSG00000184007 | 23622248 | validated |
| mirtarbase | hsa-miR-106b-5p | KMT2D   | 8085 | ENSG00000167548 | 23622248 | validated |
| mirtarbase | hsa-miR-15b-5p  | KMT2D   | 8085 | ENSG00000167548 | 23622248 | validated |
| mirtarbase | hsa-miR-222-3p  | KMT2D   | 8085 | ENSG00000167548 | 23622248 | validated |
| mirtarbase | hsa-miR-212-3p  | FXR1    | 8087 | ENSG00000114416 | 23446348 | validated |
| mirtarbase | hsa-miR-301a-3p | FXR1    | 8087 | ENSG00000114416 | 26701625 | validated |
| mirtarbase | hsa-miR-181a-5p | HMGA2   | 8091 | ENSG00000149948 | 21572407 | validated |
| mirtarbase | hsa-miR-326     | HMGA2   | 8091 | ENSG00000149948 | 26701625 | validated |
| mirtarbase | hsa-miR-21-5p   | CDK2AP1 | 8099 | ENSG00000111328 | 21328460 | validated |
| mirtarbase | hsa-miR-144-3p  | PABPN1  | 8106 | ENSG00000100836 | 23592263 | validated |
| mirtarbase | hsa-miR-21-5p   | ANP32A  | 8125 | ENSG00000140350 | 21317927 | validated |
| mirtarbase | hsa-miR-582-3p  | GAN     | 8139 | ENSG00000261609 | 23824327 | validated |
| mirtarbase | hsa-miR-582-5p  | GAN     | 8139 | ENSG00000261609 | 27292025 | validated |
| mirtarbase | hsa-miR-15b-5p  | SLC7A5  | 8140 | ENSG00000103257 | 22473208 | validated |
| mirtarbase | hsa-miR-296-5p  | SLC7A5  | 8140 | ENSG00000103257 | 26701625 | validated |
| mirtarbase | hsa-miR-181a-5p | TAF15   | 8148 | ENSG00000276833 | 17612493 | validated |
| mirtarbase | hsa-miR-15b-5p  | COIL    | 8161 | ENSG00000121058 | 23622248 | validated |
| mirtarbase | hsa-miR-222-3p  | COIL    | 8161 | ENSG00000121058 | 23622248 | validated |
| mirtarbase | hsa-miR-106b-5p | COIL    | 8161 | ENSG00000121058 | 23592263 | validated |
| mirtarbase | hsa-miR-212-3p  | DPF1    | 8193 | ENSG00000011332 | 23622248 | validated |
| mirtarbase | hsa-miR-222-3p  | MKKS    | 8195 | ENSG00000125863 | 22012620 | validated |
| mirtarbase | hsa-miR-21-5p   | GDF5    | 8200 | ENSG00000125965 | 24577233 | validated |
| mirtarbase | hsa-miR-21-5p   | NCOA3   | 8202 | ENSG00000124151 | 19528081 | validated |
| mirtarbase | hsa-miR-18a-5p  | NCOA3   | 8202 | ENSG00000124151 | 19706389 | validated |
| mirtarbase | hsa-miR-192-5p  | NCOA3   | 8202 | ENSG00000124151 | 19074876 | validated |
| mirtarbase | hsa-miR-106b-5p | NCOA3   | 8202 | ENSG00000124151 | 22473208 | validated |
| mirtarbase | hsa-miR-181a-5p | NCOA3   | 8202 | ENSG00000124151 | 22473208 | validated |
| mirtarbase | hsa-miR-15b-5p  | NRIP1   | 8204 | ENSG00000180530 | 23622248 | validated |
| mirtarbase | hsa-miR-15b-5p  | LZTR1   | 8216 | ENSG00000099949 | 23622248 | validated |
| mirtarbase | hsa-miR-582-3p  | ESS2    | 8220 | ENSG00000100056 | 26701625 | validated |
| mirtarbase | hsa-miR-106b-5p | PNPLA4  | 8228 | ENSG00000006757 | 22473208 | validated |
| mirtarbase | hsa-miR-222-3p  | USP9X   | 8239 | ENSG00000124486 | 23622248 | validated |
| mirtarbase | hsa-miR-222-3p  | RBM10   | 8241 | ENSG00000182872 | 23622248 | validated |
| mirtarbase | hsa-miR-212-3p  | KDM5C   | 8242 | ENSG00000126012 | 23592263 | validated |
| mirtarbase | hsa-miR-21-5p   | SMC1A   | 8243 | ENSG00000072501 | 18591254 | validated |
| mirtarbase | hsa-miR-301a-3p | SLC10A3 | 8273 | ENSG00000126903 | 27292025 | validated |
| mirtarbase | hsa-miR-15b-5p  | TKTL1   | 8277 | ENSG00000007350 | 22473208 | validated |
| mirtarbase | hsa-miR-144-3p  | ARID1A  | 8289 | ENSG00000117713 | 20371350 | validated |
| mirtarbase | hsa-miR-222-3p  | ARID1A  | 8289 | ENSG00000117713 | 26909602 | validated |
| mirtarbase | hsa-miR-106b-5p | SERF1B  | 8293 | ENSG00000277429 | 22012620 | validated |
| mirtarbase | hsa-miR-106b-5p | SERF1A  | 8293 | ENSG00000275581 | 22012620 | validated |
| mirtarbase | hsa-miR-106b-5p | TRRAP   | 8295 | ENSG00000196367 | 23622248 | validated |

|            |                 |          |      |                 |          |           |
|------------|-----------------|----------|------|-----------------|----------|-----------|
| mirtarbase | hsa-miR-181a-5p | KLRC4    | 8302 | ENSG00000183542 | 17612493 | validated |
| mirtarbase | hsa-miR-15b-5p  | AXIN2    | 8313 | ENSG00000168646 | 21501592 | validated |
| mirtarbase | hsa-miR-582-3p  | AXIN2    | 8313 | ENSG00000168646 | 26468775 | validated |
| mirtarbase | hsa-miR-192-5p  | CDC7     | 8317 | ENSG00000097046 | 19074876 | validated |
| mirtarbase | hsa-miR-106b-5p | EOMES    | 8320 | ENSG00000163508 | 20709030 | validated |
| mirtarbase | hsa-miR-192-5p  | FZD1     | 8321 | ENSG00000157240 | 19074876 | validated |
| mirtarbase | hsa-miR-192-5p  | FZD4     | 8322 | ENSG00000174804 | 19074876 | validated |
| mirtarbase | hsa-miR-301a-3p | FZD6     | 8323 | ENSG00000164930 | 23592263 | validated |
| mirtarbase | hsa-miR-144-3p  | FZD6     | 8323 | ENSG00000164930 | 24398324 | validated |
| mirtarbase | hsa-miR-15b-5p  | FZD6     | 8323 | ENSG00000164930 | 24398324 | validated |
| mirtarbase | hsa-miR-212-3p  | FZD6     | 8323 | ENSG00000164930 | 23592263 | validated |
| mirtarbase | hsa-miR-21-5p   | FZD6     | 8323 | ENSG00000164930 | 27347343 | validated |
| mirtarbase | hsa-miR-192-5p  | FZD7     | 8324 | ENSG00000155760 | 19074876 | validated |
| mirtarbase | hsa-miR-106b-5p | FZD9     | 8326 | ENSG00000188763 | 23446348 | validated |
| mirtarbase | hsa-miR-15b-5p  | FZD9     | 8326 | ENSG00000188763 | 20371350 | validated |
| mirtarbase | hsa-miR-106b-5p | H2BC8    | 8339 | ENSG00000273802 | 23824327 | validated |
| mirtarbase | hsa-miR-15b-5p  | H2BC21   | 8349 | ENSG00000184678 | 21572407 | validated |
| mirtarbase | hsa-miR-181a-5p | H3C4     | 8351 | ENSG00000197409 | 22473208 | validated |
| mirtarbase | hsa-miR-144-3p  | H3C2     | 8358 | ENSG00000286522 | 23313552 | validated |
| mirtarbase | hsa-miR-505-3p  | H4C4     | 8360 | ENSG00000277157 | 23622248 | validated |
| mirtarbase | hsa-miR-222-3p  | PIP5K1A  | 8394 | ENSG00000143398 | 23622248 | validated |
| mirtarbase | hsa-miR-192-5p  | PIP4K2B  | 8396 | ENSG00000277292 | 19074876 | validated |
| mirtarbase | hsa-miR-106b-5p | ULK1     | 8408 | ENSG00000177169 | 21572407 | validated |
| mirtarbase | hsa-miR-181a-5p | ULK1     | 8408 | ENSG00000177169 | 22473208 | validated |
| mirtarbase | hsa-miR-192-5p  | EEA1     | 8411 | ENSG00000102189 | 19074876 | validated |
| mirtarbase | hsa-miR-106b-5p | EEA1     | 8411 | ENSG00000102189 | 22473208 | validated |
| mirtarbase | hsa-miR-192-5p  | STX7     | 8417 | ENSG00000079950 | 16822819 | validated |
| mirtarbase | hsa-miR-505-3p  | LTBP4    | 8425 | ENSG00000090006 | 26701625 | validated |
| mirtarbase | hsa-miR-222-3p  | RECK     | 8434 | ENSG00000122707 | 22321642 | validated |
| mirtarbase | hsa-miR-505-3p  | NCK2     | 8440 | ENSG00000071051 | 23592263 | validated |
| mirtarbase | hsa-miR-222-3p  | DYRK3    | 8444 | ENSG00000143479 | 23592263 | validated |
| mirtarbase | hsa-miR-15b-5p  | DYRK3    | 8444 | ENSG00000143479 | 23592263 | validated |
| mirtarbase | hsa-miR-106b-5p | DYRK2    | 8445 | ENSG00000127334 | 21572407 | validated |
| mirtarbase | hsa-miR-582-5p  | DYRK2    | 8445 | ENSG00000127334 | 21572407 | validated |
| mirtarbase | hsa-miR-18a-5p  | CUL4A    | 8451 | ENSG00000139842 | 23622248 | validated |
| mirtarbase | hsa-miR-192-5p  | CUL3     | 8452 | ENSG00000036257 | 16822819 | validated |
| mirtarbase | hsa-miR-301a-3p | CUL3     | 8452 | ENSG00000036257 | 22012620 | validated |
| mirtarbase | hsa-miR-15b-5p  | CUL3     | 8452 | ENSG00000036257 | 23824327 | validated |
| mirtarbase | hsa-miR-15b-5p  | CUL2     | 8453 | ENSG00000108094 | 22473208 | validated |
| mirtarbase | hsa-miR-192-5p  | TTF2     | 8458 | ENSG00000116830 | 19074876 | validated |
| mirtarbase | hsa-miR-15b-5p  | SUPT3H   | 8464 | ENSG00000196284 | 23622248 | validated |
| mirtarbase | hsa-miR-144-3p  | SMARCA5  | 8467 | ENSG00000153147 | 20371350 | validated |
| mirtarbase | hsa-miR-222-3p  | IRS4     | 8471 | ENSG00000133124 | 23622248 | validated |
| mirtarbase | hsa-miR-18a-5p  | IRS4     | 8471 | ENSG00000133124 | 23622248 | validated |
| mirtarbase | hsa-miR-505-3p  | IRS4     | 8471 | ENSG00000133124 | 23824327 | validated |
| mirtarbase | hsa-miR-15b-5p  | OGT      | 8473 | ENSG00000147162 | 22473208 | validated |
| mirtarbase | hsa-miR-15b-5p  | RAE1     | 8480 | ENSG00000101146 | 23622248 | validated |
| mirtarbase | hsa-miR-106b-5p | SEMA7A   | 8482 | ENSG00000138623 | 23592263 | validated |
| mirtarbase | hsa-miR-181a-5p | RGS5     | 8490 | ENSG00000143248 | 23308108 | validated |
| mirtarbase | hsa-miR-15b-5p  | PPM1D    | 8493 | ENSG00000170836 | 25092292 | validated |
| mirtarbase | hsa-miR-21-5p   | PPFIA4   | 8497 | ENSG00000143847 | 18591254 | validated |
| mirtarbase | hsa-miR-192-5p  | RANBP3   | 8498 | ENSG00000031823 | 16822819 | validated |
| mirtarbase | hsa-miR-192-5p  | PKP4     | 8502 | ENSG00000144283 | 19074876 | validated |
| mirtarbase | hsa-miR-192-5p  | ENC1     | 8507 | ENSG00000171617 | 19074876 | validated |
| mirtarbase | hsa-miR-301a-3p | IFITM1   | 8519 | ENSG00000185885 | 27292025 | validated |
| mirtarbase | hsa-miR-106b-5p | DGKD     | 8527 | ENSG00000077044 | 23622248 | validated |
| mirtarbase | hsa-miR-18a-5p  | YBX3     | 8531 | ENSG00000060138 | 23622248 | validated |
| mirtarbase | hsa-miR-181a-5p | CBX4     | 8535 | ENSG00000141582 | 23592263 | validated |
| mirtarbase | hsa-miR-21-5p   | CBX4     | 8535 | ENSG00000141582 | 23592263 | validated |
| mirtarbase | hsa-miR-15b-5p  | CBX4     | 8535 | ENSG00000141582 | 22473208 | validated |
| mirtarbase | hsa-miR-106b-5p | MAPKAPK5 | 8550 | ENSG00000089022 | 19536157 | validated |
| mirtarbase | hsa-miR-301a-3p | MAPKAPK5 | 8550 | ENSG00000089022 | 27292025 | validated |
| mirtarbase | hsa-miR-15b-5p  | BHLHE40  | 8553 | ENSG00000134107 | 22473208 | validated |
| mirtarbase | hsa-miR-192-5p  | CDC14A   | 8556 | ENSG00000079335 | 19074876 | validated |
| mirtarbase | hsa-miR-301a-3p | CDC14A   | 8556 | ENSG00000079335 | 27323075 | validated |
| mirtarbase | hsa-miR-192-5p  | DEGS1    | 8560 | ENSG00000143753 | 19074876 | validated |
| mirtarbase | hsa-miR-106b-5p | DEGS1    | 8560 | ENSG00000143753 | 23824327 | validated |
| mirtarbase | hsa-miR-15b-5p  | DENR     | 8562 | ENSG00000139726 | 23622248 | validated |
| mirtarbase | hsa-miR-181a-5p | MADD     | 8567 | ENSG00000110514 | 22942087 | validated |
| mirtarbase | hsa-miR-15b-5p  | CASK     | 8573 | ENSG00000147044 | 23446348 | validated |
| mirtarbase | hsa-miR-106b-5p | AKR7A2   | 8574 | ENSG00000053371 | 23592263 | validated |

|            |                 |           |      |                 |          |           |
|------------|-----------------|-----------|------|-----------------|----------|-----------|
| mirtarbase | hsa-miR-192-5p  | TMEFF1    | 8577 | ENSG00000241697 | 19074876 | validated |
| mirtarbase | hsa-miR-18a-5p  | TNFSF11   | 8600 | ENSG00000120659 | 16331254 | validated |
| mirtarbase | hsa-miR-106b-5p | TNFSF11   | 8600 | ENSG00000120659 | 26053181 | validated |
| mirtarbase | hsa-miR-326     | FAM193A   | 8603 | ENSG00000125386 | 19536157 | validated |
| mirtarbase | hsa-miR-505-3p  | SLC25A12  | 8604 | ENSG00000115840 | 22291592 | validated |
| mirtarbase | hsa-miR-15b-5p  | SLC25A12  | 8604 | ENSG00000115840 | 22473208 | validated |
| mirtarbase | hsa-miR-181a-5p | PLA2G4C   | 8605 | ENSG00000105499 | 17612493 | validated |
| mirtarbase | hsa-miR-21-5p   | PLPP1     | 8611 | ENSG00000067113 | 18591254 | validated |
| mirtarbase | hsa-miR-181a-5p | PLPP3     | 8613 | ENSG00000162407 | 21572407 | validated |
| mirtarbase | hsa-miR-15b-5p  | PLPP3     | 8613 | ENSG00000162407 | 21572407 | validated |
| mirtarbase | hsa-miR-582-3p  | STC2      | 8614 | ENSG00000113739 | 22012620 | validated |
| mirtarbase | hsa-miR-106b-5p | RFXANK    | 8625 | ENSG00000064490 | 22473208 | validated |
| mirtarbase | hsa-miR-21-5p   | SOCS1     | 8651 | ENSG00000185338 | 27811366 | validated |
| mirtarbase | hsa-miR-15b-5p  | DDX3Y     | 8653 | ENSG00000067048 | 22473208 | validated |
| mirtarbase | hsa-miR-222-3p  | EIF3B     | 8662 | ENSG00000106263 | 23622248 | validated |
| mirtarbase | hsa-miR-106b-5p | EIF3F     | 8665 | ENSG00000175390 | 23622248 | validated |
| mirtarbase | hsa-miR-222-3p  | EIF3I     | 8668 | ENSG00000084623 | 23622248 | validated |
| mirtarbase | hsa-miR-301a-3p | STX16     | 8675 | ENSG00000124222 | 23592263 | validated |
| mirtarbase | hsa-miR-144-3p  | STX16     | 8675 | ENSG00000124222 | 23592263 | validated |
| mirtarbase | hsa-miR-212-3p  | PEA15     | 8682 | ENSG00000162734 | 20388802 | validated |
| mirtarbase | hsa-miR-106b-5p | PEA15     | 8682 | ENSG00000162734 | 19536157 | validated |
| mirtarbase | hsa-miR-301a-3p | GALNT4    | 8693 | ENSG00000257594 | 24398324 | validated |
| mirtarbase | hsa-miR-192-5p  | B3GALNT1  | 8706 | ENSG00000169255 | 16822819 | validated |
| mirtarbase | hsa-miR-21-5p   | B3GALNT1  | 8706 | ENSG00000169255 | 18591254 | validated |
| mirtarbase | hsa-miR-192-5p  | ABCC3     | 8714 | ENSG00000108846 | 16822819 | validated |
| mirtarbase | hsa-miR-181a-5p | NOL4      | 8715 | ENSG00000101746 | 17612493 | validated |
| mirtarbase | hsa-miR-222-3p  | SNX4      | 8723 | ENSG00000114520 | 21572407 | validated |
| mirtarbase | hsa-miR-181a-5p | EED       | 8726 | ENSG00000074266 | 22473208 | validated |
| mirtarbase | hsa-miR-106b-5p | GBF1      | 8729 | ENSG00000107862 | 22473208 | validated |
| mirtarbase | hsa-miR-181a-5p | RNMT      | 8731 | ENSG00000101654 | 23313552 | validated |
| mirtarbase | hsa-miR-15b-5p  | RNMT      | 8731 | ENSG00000101654 | 22473208 | validated |
| mirtarbase | hsa-miR-192-5p  | TNFSF13   | 8741 | ENSG00000161955 | 19074876 | validated |
| mirtarbase | hsa-miR-222-3p  | TNFSF10   | 8743 | ENSG00000121858 | 18246122 | validated |
| mirtarbase | hsa-miR-15b-5p  | TNFSF9    | 8744 | ENSG00000125657 | 22473208 | validated |
| mirtarbase | hsa-miR-18a-5p  | ADAM15    | 8751 | ENSG00000143537 | 23622248 | validated |
| mirtarbase | hsa-miR-222-3p  | ADAM1A    | 8759 |                 | 24736554 | validated |
| mirtarbase | hsa-miR-15b-5p  | CDS2      | 8760 | ENSG00000101290 | 22473208 | validated |
| mirtarbase | hsa-miR-192-5p  | PABPC4    | 8761 | ENSG00000090621 | 19074876 | validated |
| mirtarbase | hsa-miR-192-5p  | CD164     | 8763 | ENSG00000135535 | 16822819 | validated |
| mirtarbase | hsa-miR-15b-5p  | FADD      | 8772 | ENSG00000168040 | 23622248 | validated |
| mirtarbase | hsa-miR-15b-5p  | NAPG      | 8774 | ENSG00000134265 | 23592263 | validated |
| mirtarbase | hsa-miR-106b-5p | MTMR1     | 8776 | ENSG00000063601 | 23622248 | validated |
| mirtarbase | hsa-miR-21-5p   | TNFRSF10B | 8795 | ENSG00000120889 | 22473208 | validated |
| mirtarbase | hsa-miR-301a-3p | TNFRSF10B | 8795 | ENSG00000120889 | 23592263 | validated |
| mirtarbase | hsa-miR-106b-5p | TNFRSF10B | 8795 | ENSG00000120889 | 22012620 | validated |
| mirtarbase | hsa-miR-106b-5p | TNFRSF10A | 8797 | ENSG00000104689 | 28410209 | validated |
| mirtarbase | hsa-miR-15b-5p  | CREG1     | 8804 | ENSG00000143162 | 22473208 | validated |
| mirtarbase | hsa-miR-181a-5p | CCNK      | 8812 | ENSG00000090061 | 22473208 | validated |
| mirtarbase | hsa-miR-144-3p  | CCNK      | 8812 | ENSG00000090061 | 21572407 | validated |
| mirtarbase | hsa-miR-192-5p  | SAP30     | 8819 | ENSG00000164105 | 19074876 | validated |
| mirtarbase | hsa-miR-212-3p  | SAP30     | 8819 | ENSG00000164105 | 28380454 | validated |
| mirtarbase | hsa-miR-192-5p  | HESX1     | 8820 | ENSG00000163666 | 19074876 | validated |
| mirtarbase | hsa-miR-222-3p  | INPP4B    | 8821 | ENSG00000109452 | 22815788 | validated |
| mirtarbase | hsa-miR-181a-5p | INPP4B    | 8821 | ENSG00000109452 | 28224609 | validated |
| mirtarbase | hsa-miR-106b-5p | CES2      | 8824 | ENSG00000172831 | 23622248 | validated |
| mirtarbase | hsa-miR-192-5p  | IQGAP1    | 8826 | ENSG00000140575 | 19074876 | validated |
| mirtarbase | hsa-miR-181a-5p | NRP1      | 8829 | ENSG00000099250 | 17612493 | validated |
| mirtarbase | hsa-miR-181a-5p | KAT2B     | 8850 | ENSG00000114166 | 18728182 | validated |
| mirtarbase | hsa-miR-106b-5p | KAT2B     | 8850 | ENSG00000114166 | 18728182 | validated |
| mirtarbase | hsa-miR-192-5p  | KAT2B     | 8850 | ENSG00000114166 | 19074876 | validated |
| mirtarbase | hsa-miR-18a-5p  | NR1H2     | 8856 | ENSG00000144852 | 28408657 | validated |
| mirtarbase | hsa-miR-582-5p  | LDB1      | 8861 | ENSG00000198728 | 27418678 | validated |
| mirtarbase | hsa-miR-21-5p   | PER3      | 8863 | ENSG00000049246 | 18591254 | validated |
| mirtarbase | hsa-miR-21-5p   | PER2      | 8864 | ENSG00000132326 | 23824327 | validated |
| mirtarbase | hsa-miR-181a-5p | PER2      | 8864 | ENSG00000132326 | 22473208 | validated |
| mirtarbase | hsa-miR-15b-5p  | SYNJ1     | 8867 | ENSG00000159082 | 23622248 | validated |
| mirtarbase | hsa-miR-106b-5p | IER3      | 8870 | ENSG00000237155 | 22473208 | validated |
| mirtarbase | hsa-miR-106b-5p | ARHGEF7   | 8874 | ENSG00000102606 | 22473208 | validated |
| mirtarbase | hsa-miR-106b-5p | SQSTM1    | 8878 | ENSG00000161011 | 22473208 | validated |
| mirtarbase | hsa-miR-144-3p  | SGPL1     | 8879 | ENSG00000166224 | 23592263 | validated |
| mirtarbase | hsa-miR-106b-5p | SGPL1     | 8879 | ENSG00000166224 | 23592263 | validated |

|            |                 |          |      |                 |          |           |
|------------|-----------------|----------|------|-----------------|----------|-----------|
| mirtarbase | hsa-miR-192-5p  | FUBP1    | 8880 | ENSG00000162613 | 19074876 | validated |
| mirtarbase | hsa-miR-21-5p   | FUBP1    | 8880 | ENSG00000162613 | 18591254 | validated |
| mirtarbase | hsa-miR-222-3p  | FUBP1    | 8880 | ENSG00000162613 | 23622248 | validated |
| mirtarbase | hsa-miR-106b-5p | TAX1BP1  | 8887 | ENSG00000106052 | 22473208 | validated |
| mirtarbase | hsa-miR-222-3p  | MCM3AP   | 8888 | ENSG00000160294 | 23622248 | validated |
| mirtarbase | hsa-miR-106b-5p | EIF2B2   | 8892 | ENSG00000119718 | 23313552 | validated |
| mirtarbase | hsa-miR-15b-5p  | EIF2B2   | 8892 | ENSG00000119718 | 23824327 | validated |
| mirtarbase | hsa-miR-582-3p  | CPNE3    | 8895 | ENSG00000085719 | 23592263 | validated |
| mirtarbase | hsa-miR-181a-5p | MTMR3    | 8897 | ENSG00000100330 | 22971574 | validated |
| mirtarbase | hsa-miR-106b-5p | MTMR3    | 8897 | ENSG00000100330 | 22473208 | validated |
| mirtarbase | hsa-miR-15b-5p  | MTMR3    | 8897 | ENSG00000100330 | 20371350 | validated |
| mirtarbase | hsa-miR-15b-5p  | CPNE1    | 8904 | ENSG00000214078 | 22473208 | validated |
| mirtarbase | hsa-miR-192-5p  | AP1S2    | 8905 | ENSG00000182287 | 19074876 | validated |
| mirtarbase | hsa-miR-181a-5p | AP1M1    | 8907 | ENSG00000072958 | 23622248 | validated |
| mirtarbase | hsa-miR-21-5p   | BCL10    | 8915 | ENSG00000142867 | 25327529 | validated |
| mirtarbase | hsa-miR-181a-5p | HERC3    | 8916 | ENSG00000138641 | 17612493 | validated |
| mirtarbase | hsa-miR-192-5p  | HERC2    | 8924 | ENSG00000277278 | 19074876 | validated |
| mirtarbase | hsa-miR-18a-5p  | HERC1    | 8925 | ENSG00000103657 | 23622248 | validated |
| mirtarbase | hsa-miR-181a-5p | PHOX2B   | 8929 | ENSG00000109132 | 22012620 | validated |
| mirtarbase | hsa-miR-15b-5p  | MBD4     | 8930 | ENSG00000129071 | 21572407 | validated |
| mirtarbase | hsa-miR-582-3p  | RTL8C    | 8933 | ENSG00000134590 | 27292025 | validated |
| mirtarbase | hsa-miR-505-3p  | RTL8C    | 8933 | ENSG00000134590 | 28735896 | validated |
| mirtarbase | hsa-miR-106b-5p | CDK5R2   | 8941 | ENSG00000171450 | 17242205 | validated |
| mirtarbase | hsa-miR-505-3p  | BTRC     | 8945 | ENSG00000166167 | 22012620 | validated |
| mirtarbase | hsa-miR-15b-5p  | BTRC     | 8945 | ENSG00000166167 | 22473208 | validated |
| mirtarbase | hsa-miR-106b-5p | H2BC11   | 8970 | ENSG00000124635 | 23313552 | validated |
| mirtarbase | hsa-miR-301a-3p | USP13    | 8975 | ENSG00000058056 | 21572407 | validated |
| mirtarbase | hsa-miR-301a-3p | WASL     | 8976 | ENSG00000106299 | 21572407 | validated |
| mirtarbase | hsa-miR-106b-5p | WASL     | 8976 | ENSG00000106299 | 21572407 | validated |
| mirtarbase | hsa-miR-21-5p   | PLOD3    | 8985 | ENSG00000106397 | 19253296 | validated |
| mirtarbase | hsa-miR-181a-5p | ATP6V0E1 | 8992 | ENSG00000113732 | 17612493 | validated |
| mirtarbase | hsa-miR-15b-5p  | ATP6V0E1 | 8992 | ENSG00000113732 | 23622248 | validated |
| mirtarbase | hsa-miR-106b-5p | ATP6V0E1 | 8992 | ENSG00000113732 | 22473208 | validated |
| mirtarbase | hsa-miR-301a-3p | ATP6V0E1 | 8992 | ENSG00000113732 | 27292025 | validated |
| mirtarbase | hsa-miR-106b-5p | F2RL3    | 9002 | ENSG00000127533 | 21572407 | validated |
| mirtarbase | hsa-miR-192-5p  | MPZL1    | 9019 | ENSG00000197965 | 19074876 | validated |
| mirtarbase | hsa-miR-106b-5p | MAP3K14  | 9020 | ENSG00000282637 | 22473208 | validated |
| mirtarbase | hsa-miR-15b-5p  | SOCS3    | 9021 | ENSG00000184557 | 25888955 | validated |
| mirtarbase | hsa-miR-21-5p   | BAZ1B    | 9031 | ENSG00000009954 | 18591254 | validated |
| mirtarbase | hsa-miR-106b-5p | TM4SF5   | 9032 | ENSG00000142484 | 23824327 | validated |
| mirtarbase | hsa-miR-21-5p   | SEMA5A   | 9037 | ENSG00000112902 | 18591254 | validated |
| mirtarbase | hsa-miR-144-3p  | SEMA5A   | 9037 | ENSG00000112902 | 22100165 | validated |
| mirtarbase | hsa-miR-192-5p  | SPAG9    | 9043 | ENSG00000008294 | 19074876 | validated |
| mirtarbase | hsa-miR-505-3p  | BTAF1    | 9044 | ENSG00000095564 | 23622248 | validated |
| mirtarbase | hsa-miR-15b-5p  | BTAF1    | 9044 | ENSG00000095564 | 23622248 | validated |
| mirtarbase | hsa-miR-181a-5p | RPL14    | 9045 | ENSG00000188846 | 23622248 | validated |
| mirtarbase | hsa-miR-15b-5p  | RPL14    | 9045 | ENSG00000188846 | 21572407 | validated |
| mirtarbase | hsa-miR-106b-5p | RPL14    | 9045 | ENSG00000188846 | 23313552 | validated |
| mirtarbase | hsa-miR-301a-3p | GPRC5A   | 9052 | ENSG00000013588 | 23592263 | validated |
| mirtarbase | hsa-miR-15b-5p  | GPRC5A   | 9052 | ENSG00000013588 | 23824327 | validated |
| mirtarbase | hsa-miR-106b-5p | MAP7     | 9053 | ENSG00000135525 | 24398324 | validated |
| mirtarbase | hsa-miR-301a-3p | MAP7     | 9053 | ENSG00000135525 | 24398324 | validated |
| mirtarbase | hsa-miR-222-3p  | NFS1     | 9054 | ENSG00000244005 | 23622248 | validated |
| mirtarbase | hsa-miR-582-3p  | NFS1     | 9054 | ENSG00000244005 | 26701625 | validated |
| mirtarbase | hsa-miR-505-3p  | PRC1     | 9055 | ENSG00000198901 | 23622248 | validated |
| mirtarbase | hsa-miR-18a-5p  | PAPSS2   | 9060 | ENSG00000198682 | 23622248 | validated |
| mirtarbase | hsa-miR-222-3p  | DIRAS3   | 9077 | ENSG00000162595 | 21071579 | validated |
| mirtarbase | hsa-miR-18a-5p  | PKMYT1   | 9088 | ENSG00000127564 | 23622248 | validated |
| mirtarbase | hsa-miR-106b-5p | PKMYT1   | 9088 | ENSG00000127564 | 22473208 | validated |
| mirtarbase | hsa-miR-222-3p  | PIGQ     | 9091 | ENSG00000007541 | 23622248 | validated |
| mirtarbase | hsa-miR-222-3p  | SART1    | 9092 | ENSG00000175467 | 23622248 | validated |
| mirtarbase | hsa-miR-144-3p  | TBX18    | 9096 | ENSG00000112837 | 23446348 | validated |
| mirtarbase | hsa-miR-192-5p  | USP14    | 9097 | ENSG00000101557 | 19074876 | validated |
| mirtarbase | hsa-miR-212-3p  | USP8     | 9101 | ENSG00000138592 | 23313552 | validated |
| mirtarbase | hsa-miR-15b-5p  | MTMR6    | 9107 | ENSG00000139505 | 23622248 | validated |
| mirtarbase | hsa-miR-15b-5p  | MTMR4    | 9110 | ENSG00000108389 | 22473208 | validated |
| mirtarbase | hsa-miR-192-5p  | NMI      | 9111 | ENSG00000123609 | 19074876 | validated |
| mirtarbase | hsa-miR-21-5p   | LATS1    | 9113 | ENSG00000131023 | 18591254 | validated |
| mirtarbase | hsa-miR-301a-3p | ATP6V0D1 | 9114 | ENSG00000159720 | 23446348 | validated |
| mirtarbase | hsa-miR-192-5p  | SLC16A6  | 9120 | ENSG00000108932 | 19074876 | validated |
| mirtarbase | hsa-miR-106b-5p | PRPF4    | 9128 | ENSG00000136875 | 22473208 | validated |

|            |                 |          |      |                 |          |           |
|------------|-----------------|----------|------|-----------------|----------|-----------|
| mirTarbase | hsa-miR-301a-3p | PRPF4    | 9128 | ENSG00000136875 | 23313552 | validated |
| mirTarbase | hsa-miR-15b-5p  | CCNE2    | 9134 | ENSG00000175305 | 23446348 | validated |
| mirTarbase | hsa-miR-106b-5p | RABEP1   | 9135 | ENSG00000029725 | 22473208 | validated |
| mirTarbase | hsa-miR-106b-5p | CBFA2T2  | 9139 | ENSG00000078699 | 23622248 | validated |
| mirTarbase | hsa-miR-582-5p  | ATG12    | 9140 | ENSG00000145782 | 26701625 | validated |
| mirTarbase | hsa-miR-192-5p  | SYNGR1   | 9145 | ENSG00000100321 | 19074876 | validated |
| mirTarbase | hsa-miR-106b-5p | SLC28A1  | 9154 | ENSG00000156222 | 23446348 | validated |
| mirTarbase | hsa-miR-21-5p   | SCAF11   | 9169 | ENSG00000139218 | 18591254 | validated |
| mirTarbase | hsa-miR-106b-5p | LPAR2    | 9170 | ENSG00000064547 | 23592263 | validated |
| mirTarbase | hsa-miR-222-3p  | ZW10     | 9183 | ENSG00000086827 | 23622248 | validated |
| mirTarbase | hsa-miR-222-3p  | DDX21    | 9188 | ENSG00000165732 | 23622248 | validated |
| mirTarbase | hsa-miR-106b-5p | ZBED1    | 9189 | ENSG00000214717 | 19536157 | validated |
| mirTarbase | hsa-miR-192-5p  | SLC16A7  | 9194 | ENSG00000118596 | 19074876 | validated |
| mirTarbase | hsa-miR-18a-5p  | ZMYM3    | 9203 | ENSG00000147130 | 23622248 | validated |
| mirTarbase | hsa-miR-192-5p  | LRRFIP1  | 9208 | ENSG00000124831 | 19074876 | validated |
| mirTarbase | hsa-miR-192-5p  | LRRFIP2  | 9209 | ENSG00000093167 | 19074876 | validated |
| mirTarbase | hsa-miR-15b-5p  | LRRFIP2  | 9209 | ENSG00000093167 | 21572407 | validated |
| mirTarbase | hsa-miR-18a-5p  | LARGE1   | 9215 | ENSG00000133424 | 23622248 | validated |
| mirTarbase | hsa-miR-505-3p  | MTA2     | 9219 | ENSG00000149480 | 23622248 | validated |
| mirTarbase | hsa-miR-222-3p  | MTA2     | 9219 | ENSG00000149480 | 23622248 | validated |
| mirTarbase | hsa-miR-222-3p  | NOLC1    | 9221 | ENSG00000166197 | 23622248 | validated |
| mirTarbase | hsa-miR-192-5p  | DLG5     | 9231 | ENSG00000274429 | 19074876 | validated |
| mirTarbase | hsa-miR-301a-3p | DLG5     | 9231 | ENSG00000274429 | 23592263 | validated |
| mirTarbase | hsa-miR-15b-5p  | TBRG4    | 9238 | ENSG00000136270 | 23622248 | validated |
| mirTarbase | hsa-miR-144-3p  | GPR50    | 9248 | ENSG00000102195 | 21572407 | validated |
| mirTarbase | hsa-miR-106b-5p | RPS6KA5  | 9252 | ENSG00000100784 | 22012620 | validated |
| mirTarbase | hsa-miR-301a-3p | RPS6KA5  | 9252 | ENSG00000100784 | 21572407 | validated |
| mirTarbase | hsa-miR-18a-5p  | RPS6KA5  | 9252 | ENSG00000100784 | 21572407 | validated |
| mirTarbase | hsa-miR-15b-5p  | MAPKAPK2 | 9261 | ENSG00000162889 | 22473208 | validated |
| mirTarbase | hsa-miR-192-5p  | STK17B   | 9262 | ENSG00000081320 | 19074876 | validated |
| mirTarbase | hsa-miR-106b-5p | STK17B   | 9262 | ENSG00000081320 | 22473208 | validated |
| mirTarbase | hsa-miR-222-3p  | PIWIL1   | 9271 | ENSG00000275051 | 23824327 | validated |
| mirTarbase | hsa-miR-301a-3p | S1PR2    | 9294 | ENSG00000267534 | 23824327 | validated |
| mirTarbase | hsa-miR-21-5p   | SRSF11   | 9295 | ENSG00000116754 | 18591254 | validated |
| mirTarbase | hsa-miR-21-5p   | SOCS6    | 9306 | ENSG00000170677 | 27570566 | validated |
| mirTarbase | hsa-miR-192-5p  | CD83     | 9308 | ENSG00000112149 | 19074876 | validated |
| mirTarbase | hsa-miR-192-5p  | MMP20    | 9313 | ENSG00000137674 | 19074876 | validated |
| mirTarbase | hsa-miR-192-5p  | NREP     | 9315 | ENSG00000134986 | 19074876 | validated |
| mirTarbase | hsa-miR-181a-5p | COPS2    | 9318 | ENSG00000166200 | 17612493 | validated |
| mirTarbase | hsa-miR-192-5p  | TRIP13   | 9319 | ENSG00000071539 | 19074876 | validated |
| mirTarbase | hsa-miR-106b-5p | TRIP12   | 9320 | ENSG00000153827 | 23622248 | validated |
| mirTarbase | hsa-miR-106b-5p | TRIP10   | 9322 | ENSG00000125733 | 23592263 | validated |
| mirTarbase | hsa-miR-192-5p  | ZNHIT3   | 9326 | ENSG00000278574 | 19074876 | validated |
| mirTarbase | hsa-miR-222-3p  | GTF3C5   | 9328 | ENSG00000148308 | 23622248 | validated |
| mirTarbase | hsa-miR-192-5p  | B4GALT6  | 9331 | ENSG00000118276 | 19074876 | validated |
| mirTarbase | hsa-miR-222-3p  | TCEAL1   | 9338 | ENSG00000172465 | 21226887 | validated |
| mirTarbase | hsa-miR-106b-5p | TCEAL1   | 9338 | ENSG00000172465 | 21283757 | validated |
| mirTarbase | hsa-miR-15b-5p  | GLP2R    | 9340 | ENSG00000065325 | 23706177 | validated |
| mirTarbase | hsa-miR-505-3p  | SNAP29   | 9342 | ENSG00000099940 | 23622248 | validated |
| mirTarbase | hsa-miR-15b-5p  | EFTUD2   | 9343 | ENSG00000108883 | 23592263 | validated |
| mirTarbase | hsa-miR-15b-5p  | UBE4A    | 9354 | ENSG00000110344 | 22473208 | validated |
| mirTarbase | hsa-miR-326     | UBE4A    | 9354 | ENSG00000110344 | 23592263 | validated |
| mirTarbase | hsa-miR-15b-5p  | PPIG     | 9360 | ENSG00000138398 | 23446348 | validated |
| mirTarbase | hsa-miR-301a-3p | PPIG     | 9360 | ENSG00000138398 | 23446348 | validated |
| mirTarbase | hsa-miR-222-3p  | KIF3B    | 9371 | ENSG00000101350 | 23622248 | validated |
| mirTarbase | hsa-miR-181a-5p | KIF3B    | 9371 | ENSG00000101350 | 22473208 | validated |
| mirTarbase | hsa-miR-15b-5p  | KIF3B    | 9371 | ENSG00000101350 | 22473208 | validated |
| mirTarbase | hsa-miR-222-3p  | ZFYVE9   | 9372 | ENSG00000157077 | 23622248 | validated |
| mirTarbase | hsa-miR-106b-5p | ZFYVE9   | 9372 | ENSG00000157077 | 23592263 | validated |
| mirTarbase | hsa-miR-301a-3p | ZFYVE9   | 9372 | ENSG00000157077 | 23592263 | validated |
| mirTarbase | hsa-miR-15b-5p  | TM9SF2   | 9375 | ENSG00000125304 | 22473208 | validated |
| mirTarbase | hsa-miR-181a-5p | TGFBRAP1 | 9392 | ENSG00000135966 | 22942087 | validated |
| mirTarbase | hsa-miR-181a-5p | NMT2     | 9397 | ENSG00000152465 | 22473208 | validated |
| mirTarbase | hsa-miR-192-5p  | ARHGAP29 | 9411 | ENSG00000137962 | 19074876 | validated |
| mirTarbase | hsa-miR-192-5p  | MED21    | 9412 | ENSG00000152944 | 22100165 | validated |
| mirTarbase | hsa-miR-192-5p  | FAM189A2 | 9413 | ENSG00000135063 | 19074876 | validated |
| mirTarbase | hsa-miR-192-5p  | TJP2     | 9414 | ENSG00000119139 | 19074876 | validated |
| mirTarbase | hsa-miR-106b-5p | DDX23    | 9416 | ENSG00000174243 | 23622248 | validated |
| mirTarbase | hsa-miR-106b-5p | ZNF264   | 9422 | ENSG00000083844 | 22012620 | validated |
| mirTarbase | hsa-miR-106b-5p | KCNK6    | 9424 | ENSG00000099337 | 23313552 | validated |
| mirTarbase | hsa-miR-192-5p  | ABCG2    | 9429 | ENSG00000118777 | 16822819 | validated |

|            |                 |           |      |                 |          |           |
|------------|-----------------|-----------|------|-----------------|----------|-----------|
| mirTarbase | hsa-miR-181a-5p | ABCG2     | 9429 | ENSG00000118777 | 23780685 | validated |
| mirTarbase | hsa-miR-222-3p  | ABCG2     | 9429 | ENSG00000118777 | 26517090 | validated |
| mirTarbase | hsa-miR-212-3p  | ABCG2     | 9429 | ENSG00000118777 | 25766675 | validated |
| mirTarbase | hsa-miR-106b-5p | MED17     | 9440 | ENSG00000042429 | 22473208 | validated |
| mirTarbase | hsa-miR-222-3p  | QKI       | 9444 | ENSG00000112531 | 23622248 | validated |
| mirTarbase | hsa-miR-106b-5p | QKI       | 9444 | ENSG00000112531 | 23446348 | validated |
| mirTarbase | hsa-miR-301a-3p | QKI       | 9444 | ENSG00000112531 | 23446348 | validated |
| mirTarbase | hsa-miR-181a-5p | MAP4K4    | 9448 | ENSG00000071054 | 22942087 | validated |
| mirTarbase | hsa-miR-192-5p  | EIF2AK3   | 9451 | ENSG00000172071 | 19074876 | validated |
| mirTarbase | hsa-miR-192-5p  | AKAP7     | 9465 | ENSG00000118507 | 19074876 | validated |
| mirTarbase | hsa-miR-106b-5p | SH3BP5    | 9467 | ENSG00000131370 | 23313552 | validated |
| mirTarbase | hsa-miR-181a-5p | ATG5      | 9474 | ENSG00000057663 | 23322078 | validated |
| mirTarbase | hsa-miR-296-5p  | PSMF1     | 9491 | ENSG00000125818 | 19536157 | validated |
| mirTarbase | hsa-miR-106b-5p | KIF23     | 9493 | ENSG00000137807 | 17242205 | validated |
| mirTarbase | hsa-miR-192-5p  | KIF23     | 9493 | ENSG00000137807 | 19074876 | validated |
| mirTarbase | hsa-miR-15b-5p  | KIF23     | 9493 | ENSG00000137807 | 22473208 | validated |
| mirTarbase | hsa-miR-181a-5p | TBX4      | 9496 | ENSG00000121075 | 17612493 | validated |
| mirTarbase | hsa-miR-106b-5p | SLC4A7    | 9497 | ENSG00000033867 | 22473208 | validated |
| mirTarbase | hsa-miR-15b-5p  | LITAF     | 9516 | ENSG00000189067 | 22473208 | validated |
| mirTarbase | hsa-miR-106b-5p | SPTLC2    | 9517 | ENSG00000100596 | 22012620 | validated |
| mirTarbase | hsa-miR-18a-5p  | TBPL1     | 9519 | ENSG00000028839 | 23592263 | validated |
| mirTarbase | hsa-miR-15b-5p  | TBPL1     | 9519 | ENSG00000028839 | 22473208 | validated |
| mirTarbase | hsa-miR-15b-5p  | GOSR1     | 9527 | ENSG00000108587 | 21572407 | validated |
| mirTarbase | hsa-miR-15b-5p  | BAG4      | 9530 | ENSG00000156735 | 20371350 | validated |
| mirTarbase | hsa-miR-181a-5p | BAG2      | 9532 | ENSG00000112208 | 17612493 | validated |
| mirTarbase | hsa-miR-106b-5p | IGDCC3    | 9543 | ENSG00000174498 | 23622248 | validated |
| mirTarbase | hsa-miR-192-5p  | ATP6V1G1  | 9550 | ENSG00000136888 | 19074876 | validated |
| mirTarbase | hsa-miR-181a-5p | MACROH2A1 | 9555 | ENSG00000113648 | 23622248 | validated |
| mirTarbase | hsa-miR-21-5p   | VPS26A    | 9559 | ENSG00000122958 | 18591254 | validated |
| mirTarbase | hsa-miR-106b-5p | VPS26A    | 9559 | ENSG00000122958 | 22473208 | validated |
| mirTarbase | hsa-miR-296-5p  | GOSR2     | 9570 | ENSG00000108433 | 23824327 | validated |
| mirTarbase | hsa-miR-326     | GOSR2     | 9570 | ENSG00000108433 | 23824327 | validated |
| mirTarbase | hsa-miR-106b-5p | CLOCK     | 9575 | ENSG00000134852 | 17242205 | validated |
| mirTarbase | hsa-miR-21-5p   | CLOCK     | 9575 | ENSG00000134852 | 18591254 | validated |
| mirTarbase | hsa-miR-21-5p   | PREPL     | 9581 | ENSG00000138078 | 18591254 | validated |
| mirTarbase | hsa-miR-582-3p  | ENTPD4    | 9583 | ENSG00000197217 | 20371350 | validated |
| mirTarbase | hsa-miR-106b-5p | ENTPD4    | 9583 | ENSG00000197217 | 22927820 | validated |
| mirTarbase | hsa-miR-192-5p  | KIF20B    | 9585 | ENSG00000138182 | 19074876 | validated |
| mirTarbase | hsa-miR-181a-5p | AKAP12    | 9590 | ENSG00000131016 | 23622248 | validated |
| mirTarbase | hsa-miR-15b-5p  | IER2      | 9592 | ENSG00000160888 | 22473208 | validated |
| mirTarbase | hsa-miR-15b-5p  | NCOR2     | 9612 | ENSG00000196498 | 22473208 | validated |
| mirTarbase | hsa-miR-222-3p  | SEC24C    | 9632 | ENSG00000176986 | 23622248 | validated |
| mirTarbase | hsa-miR-106b-5p | FEZ2      | 9637 | ENSG00000171055 | 22473208 | validated |
| mirTarbase | hsa-miR-192-5p  | ARHGEF10  | 9639 | ENSG00000104728 | 19074876 | validated |
| mirTarbase | hsa-miR-505-3p  | MORF4L2   | 9643 | ENSG00000123562 | 23622248 | validated |
| mirTarbase | hsa-miR-582-5p  | TTC37     | 9652 | ENSG00000198677 | 20371350 | validated |
| mirTarbase | hsa-miR-144-3p  | TTC37     | 9652 | ENSG00000198677 | 20371350 | validated |
| mirTarbase | hsa-miR-15b-5p  | SOCS5     | 9655 | ENSG00000171150 | 23592263 | validated |
| mirTarbase | hsa-miR-106b-5p | SOCS5     | 9655 | ENSG00000171150 | 23446348 | validated |
| mirTarbase | hsa-miR-505-3p  | SOCS5     | 9655 | ENSG00000171150 | 23446348 | validated |
| mirTarbase | hsa-miR-505-3p  | MDC1      | 9656 | ENSG00000224587 | 23622248 | validated |
| mirTarbase | hsa-miR-18a-5p  | MDC1      | 9656 | ENSG00000224587 | 23622248 | validated |
| mirTarbase | hsa-miR-505-3p  | PDE4DIP   | 9659 | ENSG00000178104 | 23622248 | validated |
| mirTarbase | hsa-miR-582-5p  | PDE4DIP   | 9659 | ENSG00000178104 | 22012620 | validated |
| mirTarbase | hsa-miR-15b-5p  | EIF5B     | 9669 | ENSG00000158417 | 23622248 | validated |
| mirTarbase | hsa-miR-106b-5p | SLC25A44  | 9673 | ENSG00000160785 | 21572407 | validated |
| mirTarbase | hsa-miR-505-3p  | KDM4A     | 9682 | ENSG00000066135 | 23622248 | validated |
| mirTarbase | hsa-miR-106b-5p | N4BP1     | 9683 | ENSG00000102921 | 22473208 | validated |
| mirTarbase | hsa-miR-15b-5p  | N4BP1     | 9683 | ENSG00000102921 | 22473208 | validated |
| mirTarbase | hsa-miR-222-3p  | VGLL4     | 9686 | ENSG00000144560 | 26045994 | validated |
| mirTarbase | hsa-miR-15b-5p  | BZW1      | 9689 | ENSG00000082153 | 23592263 | validated |
| mirTarbase | hsa-miR-106b-5p | BZW1      | 9689 | ENSG00000082153 | 23592263 | validated |
| mirTarbase | hsa-miR-582-5p  | BZW1      | 9689 | ENSG00000082153 | 23592263 | validated |
| mirTarbase | hsa-miR-144-3p  | BZW1      | 9689 | ENSG00000082153 | 23592263 | validated |
| mirTarbase | hsa-miR-15b-5p  | UBE3C     | 9690 | ENSG00000009335 | 22473208 | validated |
| mirTarbase | hsa-miR-181a-5p | PUM1      | 9698 | ENSG00000134644 | 20371350 | validated |
| mirTarbase | hsa-miR-106b-5p | CEP57     | 9702 | ENSG00000166037 | 22473208 | validated |
| mirTarbase | hsa-miR-181a-5p | KIAA0100  | 9703 | ENSG00000007202 | 23622248 | validated |
| mirTarbase | hsa-miR-18a-5p  | KIAA0100  | 9703 | ENSG00000007202 | 23622248 | validated |
| mirTarbase | hsa-miR-15b-5p  | RUBCN     | 9711 | ENSG00000145016 | 23592263 | validated |
| mirTarbase | hsa-miR-18a-5p  | UTP14C    | 9724 | ENSG00000253797 | 21572407 | validated |



|            |                 |           |      |                 |          |           |
|------------|-----------------|-----------|------|-----------------|----------|-----------|
| mirtarbase | hsa-miR-21-5p   | SECISBP2L | 9728 | ENSG00000138593 | 22815788 | validated |
| mirtarbase | hsa-miR-301a-3p | SECISBP2L | 9728 | ENSG00000138593 | 23592263 | validated |
| mirtarbase | hsa-miR-106b-5p | CEP104    | 9731 | ENSG00000116198 | 23313552 | validated |
| mirtarbase | hsa-miR-21-5p   | DOCK4     | 9732 | ENSG00000128512 | 22158624 | validated |
| mirtarbase | hsa-miR-192-5p  | USP34     | 9736 | ENSG00000115464 | 19074876 | validated |
| mirtarbase | hsa-miR-21-5p   | USP34     | 9736 | ENSG00000115464 | 18591254 | validated |
| mirtarbase | hsa-miR-106b-5p | CCP110    | 9738 | ENSG00000103540 | 22473208 | validated |
| mirtarbase | hsa-miR-106b-5p | LAPTM4A   | 9741 | ENSG00000068697 | 22473208 | validated |
| mirtarbase | hsa-miR-15b-5p  | ARHGAP32  | 9743 | ENSG00000134909 | 19536157 | validated |
| mirtarbase | hsa-miR-21-5p   | SLK       | 9748 | ENSG00000065613 | 20371350 | validated |
| mirtarbase | hsa-miR-106b-5p | SLK       | 9748 | ENSG00000065613 | 22473208 | validated |
| mirtarbase | hsa-miR-21-5p   | PHACTR2   | 9749 | ENSG00000112419 | 18591254 | validated |
| mirtarbase | hsa-miR-181a-5p | PHACTR2   | 9749 | ENSG00000112419 | 22815788 | validated |
| mirtarbase | hsa-miR-106b-5p | KMT2B     | 9757 | ENSG00000272333 | 22012620 | validated |
| mirtarbase | hsa-miR-301a-3p | MLEC      | 9761 | ENSG00000110917 | 21572407 | validated |
| mirtarbase | hsa-miR-144-3p  | MLEC      | 9761 | ENSG00000110917 | 23313552 | validated |
| mirtarbase | hsa-miR-106b-5p | KIAA0513  | 9764 | ENSG00000135709 | 23592263 | validated |
| mirtarbase | hsa-miR-21-5p   | ZFYVE16   | 9765 | ENSG00000039319 | 18591254 | validated |
| mirtarbase | hsa-miR-106b-5p | ZFYVE16   | 9765 | ENSG00000039319 | 23622248 | validated |
| mirtarbase | hsa-miR-222-3p  | ZFYVE16   | 9765 | ENSG00000039319 | 23622248 | validated |
| mirtarbase | hsa-miR-106b-5p | SUSD6     | 9766 | ENSG00000100647 | 22473208 | validated |
| mirtarbase | hsa-miR-21-5p   | JADE3     | 9767 | ENSG00000102221 | 18591254 | validated |
| mirtarbase | hsa-miR-181a-5p | PCLAF     | 9768 | ENSG00000166803 | 17612493 | validated |
| mirtarbase | hsa-miR-106b-5p | PCLAF     | 9768 | ENSG00000166803 | 23446348 | validated |
| mirtarbase | hsa-miR-15b-5p  | RASSF2    | 9770 | ENSG00000101265 | 23708386 | validated |
| mirtarbase | hsa-miR-181a-5p | TMEM94    | 9772 | ENSG00000177728 | 24398324 | validated |
| mirtarbase | hsa-miR-106b-5p | KIAA0232  | 9778 | ENSG00000170871 | 23824327 | validated |
| mirtarbase | hsa-miR-18a-5p  | MATR3     | 9782 | ENSG00000015479 | 23622248 | validated |
| mirtarbase | hsa-miR-15b-5p  | RIMS3     | 9783 | ENSG00000117016 | 23446348 | validated |
| mirtarbase | hsa-miR-192-5p  | DLGAP5    | 9787 | ENSG00000126787 | 19074876 | validated |
| mirtarbase | hsa-miR-192-5p  | MTSS1     | 9788 | ENSG00000170873 | 19074876 | validated |
| mirtarbase | hsa-miR-15b-5p  | MTSS1     | 9788 | ENSG00000170873 | 25783158 | validated |
| mirtarbase | hsa-miR-505-3p  | BMS1      | 9790 | ENSG00000165733 | 22012620 | validated |
| mirtarbase | hsa-miR-21-5p   | CKAP5     | 9793 | ENSG00000175216 | 18591254 | validated |
| mirtarbase | hsa-miR-18a-5p  | CKAP5     | 9793 | ENSG00000175216 | 20371350 | validated |
| mirtarbase | hsa-miR-15b-5p  | CKAP5     | 9793 | ENSG00000175216 | 23622248 | validated |
| mirtarbase | hsa-miR-15b-5p  | PHYHIP    | 9796 | ENSG00000168490 | 23592263 | validated |
| mirtarbase | hsa-miR-222-3p  | TATDN2    | 9797 | ENSG00000157014 | 23622248 | validated |
| mirtarbase | hsa-miR-181a-5p | DAZAP2    | 9802 | ENSG00000183283 | 22473208 | validated |
| mirtarbase | hsa-miR-582-5p  | DAZAP2    | 9802 | ENSG00000183283 | 23592263 | validated |
| mirtarbase | hsa-miR-212-3p  | DAZAP2    | 9802 | ENSG00000183283 | 26701625 | validated |
| mirtarbase | hsa-miR-18a-5p  | TOMM20    | 9804 | ENSG00000173726 | 23592263 | validated |
| mirtarbase | hsa-miR-21-5p   | SCRN1     | 9805 | ENSG00000136193 | 18591254 | validated |
| mirtarbase | hsa-miR-296-5p  | RNF40     | 9810 | ENSG00000103549 | 26701625 | validated |
| mirtarbase | hsa-miR-106b-5p | EFCAB14   | 9813 | ENSG00000159658 | 17242205 | validated |
| mirtarbase | hsa-miR-18a-5p  | EFCAB14   | 9813 | ENSG00000159658 | 23313552 | validated |
| mirtarbase | hsa-miR-181a-5p | EFCAB14   | 9813 | ENSG00000159658 | 22473208 | validated |
| mirtarbase | hsa-miR-15b-5p  | URB2      | 9816 | ENSG00000135763 | 23622248 | validated |
| mirtarbase | hsa-miR-181a-5p | NUP58     | 9818 | ENSG00000139496 | 20371350 | validated |
| mirtarbase | hsa-miR-15b-5p  | TSC22D2   | 9819 | ENSG00000196428 | 23592263 | validated |
| mirtarbase | hsa-miR-144-3p  | TSC22D2   | 9819 | ENSG00000196428 | 24906430 | validated |
| mirtarbase | hsa-miR-192-5p  | ARHGAP11A | 9824 | ENSG00000198826 | 19074876 | validated |
| mirtarbase | hsa-miR-144-3p  | SPATA2    | 9825 | ENSG00000158480 | 24398324 | validated |
| mirtarbase | hsa-miR-15b-5p  | TRIM14    | 9830 | ENSG00000106785 | 28350138 | validated |
| mirtarbase | hsa-miR-106b-5p | MELK      | 9833 | ENSG00000165304 | 23824327 | validated |
| mirtarbase | hsa-miR-181a-5p | ZEB2      | 9839 | ENSG00000169554 | 23622248 | validated |
| mirtarbase | hsa-miR-222-3p  | ZEB2      | 9839 | ENSG00000169554 | 24510096 | validated |
| mirtarbase | hsa-miR-144-3p  | ZEB2      | 9839 | ENSG00000169554 | 27785072 | validated |
| mirtarbase | hsa-miR-106b-5p | PLEKHM1   | 9842 | ENSG00000276358 | 23622248 | validated |
| mirtarbase | hsa-miR-192-5p  | GAB2      | 9846 | ENSG00000033327 | 19074876 | validated |
| mirtarbase | hsa-miR-192-5p  | EPM2AIP1  | 9852 | ENSG00000178567 | 19074876 | validated |
| mirtarbase | hsa-miR-21-5p   | EPM2AIP1  | 9852 | ENSG00000178567 | 22473208 | validated |
| mirtarbase | hsa-miR-15b-5p  | EPM2AIP1  | 9852 | ENSG00000178567 | 21572407 | validated |
| mirtarbase | hsa-miR-192-5p  | PPP1R26   | 9858 | ENSG00000196422 | 19074876 | validated |
| mirtarbase | hsa-miR-106b-5p | CEP170    | 9859 | ENSG00000276725 | 22100165 | validated |
| mirtarbase | hsa-miR-301a-3p | CEP170    | 9859 | ENSG00000276725 | 23446348 | validated |
| mirtarbase | hsa-miR-15b-5p  | LRIG2     | 9860 | ENSG00000198799 | 24398324 | validated |
| mirtarbase | hsa-miR-192-5p  | PSMD6     | 9861 | ENSG00000163636 | 19074876 | validated |
| mirtarbase | hsa-miR-505-3p  | PJA2      | 9867 | ENSG00000198961 | 23622248 | validated |
| mirtarbase | hsa-miR-192-5p  | SEC24D    | 9871 | ENSG00000150961 | 19074876 | validated |
| mirtarbase | hsa-miR-15b-5p  | TLK1      | 9874 | ENSG00000198586 | 22473208 | validated |

|            |                 |          |       |                 |          |           |
|------------|-----------------|----------|-------|-----------------|----------|-----------|
| mirTarbase | hsa-miR-505-3p  | TLK1     | 9874  | ENSG00000198586 | 19536157 | validated |
| mirTarbase | hsa-miR-582-5p  | ZC3H11A  | 9877  | ENSG00000058673 | 23592263 | validated |
| mirTarbase | hsa-miR-144-3p  | ZC3H11A  | 9877  | ENSG00000058673 | 23592263 | validated |
| mirTarbase | hsa-miR-21-5p   | DDX46    | 9879  | ENSG00000145833 | 18591254 | validated |
| mirTarbase | hsa-miR-106b-5p | ZBTB39   | 9880  | ENSG00000166860 | 23622248 | validated |
| mirTarbase | hsa-miR-222-3p  | POM121   | 9883  | ENSG00000196313 | 23622248 | validated |
| mirTarbase | hsa-miR-106b-5p | SMG7     | 9887  | ENSG00000116698 | 23622248 | validated |
| mirTarbase | hsa-miR-15b-5p  | TECPR2   | 9895  | ENSG00000196663 | 22473208 | validated |
| mirTarbase | hsa-miR-301a-3p | FIG4     | 9896  | ENSG00000112367 | 23824327 | validated |
| mirTarbase | hsa-miR-181a-5p | WASHC5   | 9897  | ENSG00000164961 | 22473208 | validated |
| mirTarbase | hsa-miR-222-3p  | SV2A     | 9900  | ENSG00000159164 | 23622248 | validated |
| mirTarbase | hsa-miR-301a-3p | KLHL21   | 9903  | ENSG00000162413 | 20371350 | validated |
| mirTarbase | hsa-miR-15b-5p  | AP5Z1    | 9907  | ENSG00000242802 | 21572407 | validated |
| mirTarbase | hsa-miR-181a-5p | G3BP2    | 9908  | ENSG00000138757 | 22473208 | validated |
| mirTarbase | hsa-miR-106b-5p | RABGAP1L | 9910  | ENSG00000152061 | 23313552 | validated |
| mirTarbase | hsa-miR-18a-5p  | SUPT7L   | 9913  | ENSG00000119760 | 20371350 | validated |
| mirTarbase | hsa-miR-192-5p  | FAM20B   | 9917  | ENSG00000116199 | 19074876 | validated |
| mirTarbase | hsa-miR-21-5p   | FAM20B   | 9917  | ENSG00000116199 | 18591254 | validated |
| mirTarbase | hsa-miR-222-3p  | NCAPD2   | 9918  | ENSG00000010292 | 23622248 | validated |
| mirTarbase | hsa-miR-106b-5p | NCAPD2   | 9918  | ENSG00000010292 | 22473208 | validated |
| mirTarbase | hsa-miR-301a-3p | NCAPD2   | 9918  | ENSG00000010292 | 23446348 | validated |
| mirTarbase | hsa-miR-106b-5p | SEC16A   | 9919  | ENSG00000148396 | 22473208 | validated |
| mirTarbase | hsa-miR-301a-3p | SEC16A   | 9919  | ENSG00000148396 | 26701625 | validated |
| mirTarbase | hsa-miR-192-5p  | KBTBD11  | 9920  | ENSG00000176595 | 19074876 | validated |
| mirTarbase | hsa-miR-222-3p  | RNF10    | 9921  | ENSG00000022840 | 23622248 | validated |
| mirTarbase | hsa-miR-106b-5p | IQSEC1   | 9922  | ENSG00000144711 | 22473208 | validated |
| mirTarbase | hsa-miR-222-3p  | PAN2     | 9924  | ENSG00000135473 | 23622248 | validated |
| mirTarbase | hsa-miR-106b-5p | ZBTB5    | 9925  | ENSG00000168795 | 23592263 | validated |
| mirTarbase | hsa-miR-222-3p  | ZBTB5    | 9925  | ENSG00000168795 | 22012620 | validated |
| mirTarbase | hsa-miR-15b-5p  | ZBTB5    | 9925  | ENSG00000168795 | 22473208 | validated |
| mirTarbase | hsa-miR-181a-5p | LPGAT1   | 9926  | ENSG00000123684 | 17612493 | validated |
| mirTarbase | hsa-miR-21-5p   | LPGAT1   | 9926  | ENSG00000123684 | 18591254 | validated |
| mirTarbase | hsa-miR-106b-5p | LPGAT1   | 9926  | ENSG00000123684 | 22473208 | validated |
| mirTarbase | hsa-miR-106b-5p | MFN2     | 9927  | ENSG00000116688 | 23954742 | validated |
| mirTarbase | hsa-miR-192-5p  | KIF14    | 9928  | ENSG00000118193 | 19074876 | validated |
| mirTarbase | hsa-miR-144-3p  | RBM8A    | 9939  | ENSG00000265241 | 23592263 | validated |
| mirTarbase | hsa-miR-106b-5p | WDR1     | 9948  | ENSG00000071127 | 22473208 | validated |
| mirTarbase | hsa-miR-181a-5p | AMMECR1  | 9949  | ENSG00000101935 | 17612493 | validated |
| mirTarbase | hsa-miR-192-5p  | AMMECR1  | 9949  | ENSG00000101935 | 19074876 | validated |
| mirTarbase | hsa-miR-192-5p  | HS3ST3B1 | 9953  | ENSG00000125430 | 19074876 | validated |
| mirTarbase | hsa-miR-21-5p   | HS3ST3B1 | 9953  | ENSG00000125430 | 20371350 | validated |
| mirTarbase | hsa-miR-212-3p  | HS3ST3B1 | 9953  | ENSG00000125430 | 23446348 | validated |
| mirTarbase | hsa-miR-106b-5p | HS3ST1   | 9957  | ENSG00000002587 | 23313552 | validated |
| mirTarbase | hsa-miR-222-3p  | USP15    | 9958  | ENSG00000135655 | 23622248 | validated |
| mirTarbase | hsa-miR-15b-5p  | USP15    | 9958  | ENSG00000135655 | 20371350 | validated |
| mirTarbase | hsa-miR-106b-5p | USP3     | 9960  | ENSG00000140455 | 22473208 | validated |
| mirTarbase | hsa-miR-15b-5p  | USP3     | 9960  | ENSG00000140455 | 22473208 | validated |
| mirTarbase | hsa-miR-326     | THRAP3   | 9967  | ENSG00000054118 | 23622248 | validated |
| mirTarbase | hsa-miR-15b-5p  | THRAP3   | 9967  | ENSG00000054118 | 20371350 | validated |
| mirTarbase | hsa-miR-582-3p  | CCS      | 9973  | ENSG00000173992 | 23824327 | validated |
| mirTarbase | hsa-miR-15b-5p  | HNRNPDL  | 9987  | ENSG00000152795 | 23446348 | validated |
| mirTarbase | hsa-miR-21-5p   | DMTF1    | 9988  | ENSG00000135164 | 18591254 | validated |
| mirTarbase | hsa-miR-15b-5p  | DMTF1    | 9988  | ENSG00000135164 | 22473208 | validated |
| mirTarbase | hsa-miR-106b-5p | SLC12A6  | 9990  | ENSG00000140199 | 27292025 | validated |
| mirTarbase | hsa-miR-21-5p   | PTBP3    | 9991  | ENSG00000119314 | 18591254 | validated |
| mirTarbase | hsa-miR-181a-5p | PTBP3    | 9991  | ENSG00000119314 | 23824327 | validated |
| mirTarbase | hsa-miR-222-3p  | PTBP3    | 9991  | ENSG00000119314 | 21572407 | validated |
| mirTarbase | hsa-miR-15b-5p  | AKT3     | 10000 | ENSG00000275199 | 23592263 | validated |
| mirTarbase | hsa-miR-222-3p  | AKT3     | 10000 | ENSG00000275199 | 20371350 | validated |
| mirTarbase | hsa-miR-192-5p  | ZBTB33   | 10009 | ENSG00000177485 | 19074876 | validated |
| mirTarbase | hsa-miR-106b-5p | ZBTB33   | 10009 | ENSG00000177485 | 22473208 | validated |
| mirTarbase | hsa-miR-181a-5p | ZBTB33   | 10009 | ENSG00000177485 | 22473208 | validated |
| mirTarbase | hsa-miR-15b-5p  | ZBTB33   | 10009 | ENSG00000177485 | 22473208 | validated |
| mirTarbase | hsa-miR-181a-5p | HDAC6    | 10013 | ENSG00000094631 | 23622248 | validated |
| mirTarbase | hsa-miR-18a-5p  | BCL2L10  | 10017 | ENSG00000137875 | 24184144 | validated |
| mirTarbase | hsa-miR-222-3p  | BCL2L11  | 10018 | ENSG00000153094 | 23446348 | validated |
| mirTarbase | hsa-miR-106b-5p | BCL2L11  | 10018 | ENSG00000153094 | 23028803 | validated |
| mirTarbase | hsa-miR-181a-5p | BCL2L11  | 10018 | ENSG00000153094 | 20841506 | validated |
| mirTarbase | hsa-miR-301a-3p | BCL2L11  | 10018 | ENSG00000153094 | 22628193 | validated |
| mirTarbase | hsa-miR-192-5p  | BCL2L11  | 10018 | ENSG00000153094 | 23592263 | validated |
| mirTarbase | hsa-miR-144-3p  | BCL2L11  | 10018 | ENSG00000153094 | 23592263 | validated |

|            |                 |          |       |                 |          |           |
|------------|-----------------|----------|-------|-----------------|----------|-----------|
| mirTarbase | hsa-miR-192-5p  | SH2B3    | 10019 | ENSG00000111252 | 19074876 | validated |
| mirTarbase | hsa-miR-21-5p   | GNE      | 10020 | ENSG00000159921 | 18591254 | validated |
| mirTarbase | hsa-miR-192-5p  | HCN4     | 10021 | ENSG00000138622 | 19074876 | validated |
| mirTarbase | hsa-miR-192-5p  | TROAP    | 10024 | ENSG00000135451 | 19074876 | validated |
| mirTarbase | hsa-miR-106b-5p | MED16    | 10025 | ENSG00000175221 | 23446348 | validated |
| mirTarbase | hsa-miR-106b-5p | CHAF1A   | 10036 | ENSG00000167670 | 22473208 | validated |
| mirTarbase | hsa-miR-222-3p  | TOM1     | 10043 | ENSG00000100284 | 23622248 | validated |
| mirTarbase | hsa-miR-296-5p  | TOM1     | 10043 | ENSG00000100284 | 19536157 | validated |
| mirTarbase | hsa-miR-106b-5p | DNAJB6   | 10049 | ENSG00000105993 | 17242205 | validated |
| mirTarbase | hsa-miR-192-5p  | SMC4     | 10051 | ENSG00000113810 | 19074876 | validated |
| mirTarbase | hsa-miR-181a-5p | UBA2     | 10054 | ENSG00000126261 | 23622248 | validated |
| mirTarbase | hsa-miR-106b-5p | DNM1L    | 10059 | ENSG00000087470 | 22473208 | validated |
| mirTarbase | hsa-miR-21-5p   | DNM1L    | 10059 | ENSG00000087470 | 28347692 | validated |
| mirTarbase | hsa-miR-326     | ABC2     | 10061 | ENSG00000033050 | 23622248 | validated |
| mirTarbase | hsa-miR-106b-5p | SCAMP2   | 10066 | ENSG00000140497 | 22473208 | validated |
| mirTarbase | hsa-miR-181a-5p | SCAMP2   | 10066 | ENSG00000140497 | 21572407 | validated |
| mirTarbase | hsa-miR-106b-5p | HUWE1    | 10075 | ENSG00000086758 | 23622248 | validated |
| mirTarbase | hsa-miR-181a-5p | HUWE1    | 10075 | ENSG00000086758 | 23622248 | validated |
| mirTarbase | hsa-miR-21-5p   | EDIL3    | 10085 | ENSG00000164176 | 18591254 | validated |
| mirTarbase | hsa-miR-192-5p  | ACTR2    | 10097 | ENSG00000138071 | 19074876 | validated |
| mirTarbase | hsa-miR-21-5p   | ACTR2    | 10097 | ENSG00000138071 | 18591254 | validated |
| mirTarbase | hsa-miR-15b-5p  | ACTR2    | 10097 | ENSG00000138071 | 22473208 | validated |
| mirTarbase | hsa-miR-106b-5p | ACTR2    | 10097 | ENSG00000138071 | 23446348 | validated |
| mirTarbase | hsa-miR-15b-5p  | TSPAN3   | 10099 | ENSG00000140391 | 23622248 | validated |
| mirTarbase | hsa-miR-301a-3p | TSPAN3   | 10099 | ENSG00000140391 | 21572407 | validated |
| mirTarbase | hsa-miR-106b-5p | CTDSP2   | 10106 | ENSG00000175215 | 23622248 | validated |
| mirTarbase | hsa-miR-192-5p  | KIF20A   | 10112 | ENSG00000112984 | 19074876 | validated |
| mirTarbase | hsa-miR-106b-5p | FEM1B    | 10116 | ENSG00000169018 | 21572407 | validated |
| mirTarbase | hsa-miR-192-5p  | ACTR1B   | 10120 | ENSG00000115073 | 19074876 | validated |
| mirTarbase | hsa-miR-192-5p  | ARL4C    | 10123 | ENSG00000188042 | 19074876 | validated |
| mirTarbase | hsa-miR-296-5p  | ARL4C    | 10123 | ENSG00000188042 | 23824327 | validated |
| mirTarbase | hsa-miR-192-5p  | ZNF263   | 10127 | ENSG00000006194 | 20371350 | validated |
| mirTarbase | hsa-miR-15b-5p  | LRPPRC   | 10128 | ENSG00000138095 | 22473208 | validated |
| mirTarbase | hsa-miR-181a-5p | PDIA6    | 10130 | ENSG00000143870 | 23313552 | validated |
| mirTarbase | hsa-miR-15b-5p  | PDIA6    | 10130 | ENSG00000143870 | 20371350 | validated |
| mirTarbase | hsa-miR-222-3p  | TRAP1    | 10131 | ENSG00000126602 | 23622248 | validated |
| mirTarbase | hsa-miR-192-5p  | AKAP9    | 10142 | ENSG00000127914 | 16822819 | validated |
| mirTarbase | hsa-miR-21-5p   | AKAP9    | 10142 | ENSG00000127914 | 19242418 | validated |
| mirTarbase | hsa-miR-181a-5p | FAM13A   | 10144 | ENSG00000138640 | 19536157 | validated |
| mirTarbase | hsa-miR-582-5p  | G3BP1    | 10146 | ENSG00000145907 | 23592263 | validated |
| mirTarbase | hsa-miR-21-5p   | ADGRG2   | 10149 | ENSG00000173698 | 18591254 | validated |
| mirTarbase | hsa-miR-106b-5p | ABI2     | 10152 | ENSG00000138443 | 23706177 | validated |
| mirTarbase | hsa-miR-222-3p  | PLXNC1   | 10154 | ENSG00000136040 | 26370254 | validated |
| mirTarbase | hsa-miR-505-3p  | TRIM28   | 10155 | ENSG00000130726 | 23622248 | validated |
| mirTarbase | hsa-miR-106b-5p | SERF2    | 10169 | ENSG00000140264 | 23446348 | validated |
| mirTarbase | hsa-miR-192-5p  | LHFPL6   | 10186 | ENSG00000183722 | 19074876 | validated |
| mirTarbase | hsa-miR-505-3p  | ALYREF   | 10189 | ENSG00000183684 | 23622248 | validated |
| mirTarbase | hsa-miR-222-3p  | ALG3     | 10195 | ENSG00000214160 | 23622248 | validated |
| mirTarbase | hsa-miR-106b-5p | PRMT3    | 10196 | ENSG00000185238 | 23622248 | validated |
| mirTarbase | hsa-miR-15b-5p  | MPHOSPH9 | 10198 | ENSG00000051825 | 23622248 | validated |
| mirTarbase | hsa-miR-106b-5p | NME6     | 10201 | ENSG00000172113 | 22012620 | validated |
| mirTarbase | hsa-miR-15b-5p  | PATJ     | 10207 | ENSG00000132849 | 23622248 | validated |
| mirTarbase | hsa-miR-106b-5p | TOPORS   | 10210 | ENSG00000197579 | 22473208 | validated |
| mirTarbase | hsa-miR-18a-5p  | CTDSPL   | 10217 | ENSG00000144677 | 20371350 | validated |
| mirTarbase | hsa-miR-15b-5p  | CTDSPL   | 10217 | ENSG00000144677 | 21572407 | validated |
| mirTarbase | hsa-miR-181a-5p | CTDSPL   | 10217 | ENSG00000144677 | 25174404 | validated |
| mirTarbase | hsa-miR-106b-5p | GDF11    | 10220 | ENSG00000135414 | 21572407 | validated |
| mirTarbase | hsa-miR-144-3p  | TRIB1    | 10221 | ENSG00000173334 | 26701625 | validated |
| mirTarbase | hsa-miR-192-5p  | ZNF443   | 10224 | ENSG00000180855 | 19074876 | validated |
| mirTarbase | hsa-miR-192-5p  | MFS10    | 10227 | ENSG00000109736 | 16822819 | validated |
| mirTarbase | hsa-miR-106b-5p | STX6     | 10228 | ENSG00000135823 | 22473208 | validated |
| mirTarbase | hsa-miR-301a-3p | STX6     | 10228 | ENSG00000135823 | 23592263 | validated |
| mirTarbase | hsa-miR-21-5p   | MSLN     | 10232 | ENSG00000102854 | 28125734 | validated |
| mirTarbase | hsa-miR-181a-5p | LRRC17   | 10234 | ENSG00000128606 | 17612493 | validated |
| mirTarbase | hsa-miR-18a-5p  | HNRNP    | 10236 | ENSG00000125944 | 20371350 | validated |
| mirTarbase | hsa-miR-106b-5p | HNRNP    | 10236 | ENSG00000125944 | 23446348 | validated |
| mirTarbase | hsa-miR-326     | DCAF7    | 10238 | ENSG00000136485 | 23622248 | validated |
| mirTarbase | hsa-miR-222-3p  | DCAF7    | 10238 | ENSG00000136485 | 23622248 | validated |
| mirTarbase | hsa-miR-18a-5p  | DCAF7    | 10238 | ENSG00000136485 | 23622248 | validated |
| mirTarbase | hsa-miR-18a-5p  | AP3S2    | 10239 | ENSG00000157823 | 20371350 | validated |
| mirTarbase | hsa-miR-301a-3p | POP7     | 10248 | ENSG00000172336 | 21572407 | validated |

|            |                 |         |       |                 |          |           |
|------------|-----------------|---------|-------|-----------------|----------|-----------|
| mirTarbase | hsa-miR-326     | SRRM1   | 10250 | ENSG00000133226 | 23622248 | validated |
| mirTarbase | hsa-miR-21-5p   | SPRY2   | 10253 | ENSG00000136158 | 18508928 | validated |
| mirTarbase | hsa-miR-181a-5p | SPRY2   | 10253 | ENSG00000136158 | 20371350 | validated |
| mirTarbase | hsa-miR-301a-3p | CDK2AP2 | 10263 | ENSG00000167797 | 20371350 | validated |
| mirTarbase | hsa-miR-21-5p   | STUB1   | 10273 | ENSG00000103266 | 26841045 | validated |
| mirTarbase | hsa-miR-212-3p  | STAG1   | 10274 | ENSG00000118007 | 22100165 | validated |
| mirTarbase | hsa-miR-181a-5p | STAG1   | 10274 | ENSG00000118007 | 22473208 | validated |
| mirTarbase | hsa-miR-21-5p   | SMNDC1  | 10285 | ENSG00000119953 | 20371350 | validated |
| mirTarbase | hsa-miR-301a-3p | SF3A1   | 10291 | ENSG00000099995 | 23824327 | validated |
| mirTarbase | hsa-miR-192-5p  | TRAIP   | 10293 | ENSG00000183763 | 19074876 | validated |
| mirTarbase | hsa-miR-106b-5p | MARCHF6 | 10299 | ENSG00000145495 | 23446348 | validated |
| mirTarbase | hsa-miR-192-5p  | ZNF267  | 10308 | ENSG00000185947 | 19074876 | validated |
| mirTarbase | hsa-miR-15b-5p  | ZNF267  | 10308 | ENSG00000185947 | 21572407 | validated |
| mirTarbase | hsa-miR-192-5p  | CCNO    | 10309 | ENSG00000152669 | 19074876 | validated |
| mirTarbase | hsa-miR-15b-5p  | VPS26C  | 10311 | ENSG00000157538 | 22473208 | validated |
| mirTarbase | hsa-miR-15b-5p  | LANCL1  | 10314 | ENSG00000115365 | 20371350 | validated |
| mirTarbase | hsa-miR-181a-5p | TNIP1   | 10318 | ENSG00000145901 | 23622248 | validated |
| mirTarbase | hsa-miR-582-3p  | TNIP1   | 10318 | ENSG00000145901 | 23446348 | validated |
| mirTarbase | hsa-miR-326     | PCGF3   | 10336 | ENSG00000185619 | 26701625 | validated |
| mirTarbase | hsa-miR-192-5p  | TFG     | 10342 | ENSG00000114354 | 16822819 | validated |
| mirTarbase | hsa-miR-192-5p  | ABCA8   | 10351 | ENSG00000141338 | 16822819 | validated |
| mirTarbase | hsa-miR-181a-5p | NPM3    | 10360 | ENSG00000107833 | 23446348 | validated |
| mirTarbase | hsa-miR-106b-5p | IRF9    | 10379 | ENSG00000213928 | 17242205 | validated |
| mirTarbase | hsa-miR-505-3p  | TUBB3   | 10381 | ENSG00000258947 | 23622248 | validated |
| mirTarbase | hsa-miR-301a-3p | TUBB4B  | 10383 | ENSG00000188229 | 23622248 | validated |
| mirTarbase | hsa-miR-106b-5p | TUBB4B  | 10383 | ENSG00000188229 | 23622248 | validated |
| mirTarbase | hsa-miR-106b-5p | BTN3A3  | 10384 | ENSG00000111801 | 17242205 | validated |
| mirTarbase | hsa-miR-21-5p   | BTN3A3  | 10384 | ENSG00000111801 | 22473208 | validated |
| mirTarbase | hsa-miR-15b-5p  | BTN3A3  | 10384 | ENSG00000111801 | 21572407 | validated |
| mirTarbase | hsa-miR-192-5p  | CORO2B  | 10391 | ENSG00000103647 | 19074876 | validated |
| mirTarbase | hsa-miR-192-5p  | ANAPC10 | 10393 | ENSG00000164162 | 19074876 | validated |
| mirTarbase | hsa-miR-301a-3p | DLC1    | 10395 | ENSG00000164741 | 20371350 | validated |
| mirTarbase | hsa-miR-181a-5p | ATP8A1  | 10396 | ENSG00000124406 | 20371350 | validated |
| mirTarbase | hsa-miR-505-3p  | NDRG1   | 10397 | ENSG00000104419 | 23622248 | validated |
| mirTarbase | hsa-miR-18a-5p  | RACK1   | 10399 | ENSG00000204628 | 23622248 | validated |
| mirTarbase | hsa-miR-21-5p   | PIAS3   | 10401 | ENSG00000131788 | 22316494 | validated |
| mirTarbase | hsa-miR-18a-5p  | PIAS3   | 10401 | ENSG00000131788 | 23322197 | validated |
| mirTarbase | hsa-miR-192-5p  | ST3GAL6 | 10402 | ENSG00000064225 | 19074876 | validated |
| mirTarbase | hsa-miR-21-5p   | BASP1   | 10409 | ENSG00000176788 | 19253296 | validated |
| mirTarbase | hsa-miR-21-5p   | TESK2   | 10420 | ENSG00000070759 | 18591254 | validated |
| mirTarbase | hsa-miR-106b-5p | CDIPT   | 10423 | ENSG00000103502 | 19536157 | validated |
| mirTarbase | hsa-miR-21-5p   | PGRMC2  | 10424 | ENSG00000164040 | 18591254 | validated |
| mirTarbase | hsa-miR-192-5p  | TUBGCP3 | 10426 | ENSG00000126216 | 19074876 | validated |
| mirTarbase | hsa-miR-18a-5p  | SEC24B  | 10427 | ENSG00000138802 | 23622248 | validated |
| mirTarbase | hsa-miR-21-5p   | TMEM147 | 10430 | ENSG00000105677 | 23622248 | validated |
| mirTarbase | hsa-miR-222-3p  | LYPLA1  | 10434 | ENSG00000120992 | 22815788 | validated |
| mirTarbase | hsa-miR-192-5p  | C1D     | 10438 | ENSG00000197223 | 16822819 | validated |
| mirTarbase | hsa-miR-106b-5p | TIMM17A | 10440 | ENSG00000134375 | 22012620 | validated |
| mirTarbase | hsa-miR-106b-5p | N4BP2L2 | 10443 | ENSG00000244754 | 23706177 | validated |
| mirTarbase | hsa-miR-18a-5p  | FAM3C   | 10447 | ENSG00000196937 | 21572407 | validated |
| mirTarbase | hsa-miR-181a-5p | FAM3C   | 10447 | ENSG00000196937 | 20371350 | validated |
| mirTarbase | hsa-miR-21-5p   | ECI2    | 10455 | ENSG00000198721 | 20371350 | validated |
| mirTarbase | hsa-miR-222-3p  | COG5    | 10466 | ENSG00000164597 | 22012620 | validated |
| mirTarbase | hsa-miR-106b-5p | PFDN6   | 10471 | ENSG00000224782 | 23622248 | validated |
| mirTarbase | hsa-miR-192-5p  | ZBTB18  | 10472 | ENSG00000179456 | 19074876 | validated |
| mirTarbase | hsa-miR-106b-5p | ZBTB18  | 10472 | ENSG00000179456 | 22473208 | validated |
| mirTarbase | hsa-miR-301a-3p | ZBTB18  | 10472 | ENSG00000179456 | 20371350 | validated |
| mirTarbase | hsa-miR-505-3p  | ZBTB18  | 10472 | ENSG00000179456 | 20371350 | validated |
| mirTarbase | hsa-miR-505-3p  | HMGNA4  | 10473 | ENSG00000182952 | 23622248 | validated |
| mirTarbase | hsa-miR-21-5p   | TRIM38  | 10475 | ENSG00000112343 | 18591254 | validated |
| mirTarbase | hsa-miR-21-5p   | SLC9A6  | 10479 | ENSG00000198689 | 18591254 | validated |
| mirTarbase | hsa-miR-15b-5p  | SLC9A6  | 10479 | ENSG00000198689 | 22473208 | validated |
| mirTarbase | hsa-miR-192-5p  | SEC23B  | 10483 | ENSG00000101310 | 19074876 | validated |
| mirTarbase | hsa-miR-301a-3p | SEC23B  | 10483 | ENSG00000101310 | 21572407 | validated |
| mirTarbase | hsa-miR-106b-5p | SEC23A  | 10484 | ENSG00000100934 | 22473208 | validated |
| mirTarbase | hsa-miR-15b-5p  | LRRRC41 | 10489 | ENSG00000132128 | 23622248 | validated |
| mirTarbase | hsa-miR-18a-5p  | LRRRC41 | 10489 | ENSG00000132128 | 23622248 | validated |
| mirTarbase | hsa-miR-192-5p  | SYNCRIP | 10492 | ENSG00000135316 | 19074876 | validated |
| mirTarbase | hsa-miR-181a-5p | CARM1   | 10498 | ENSG00000142453 | 22473208 | validated |
| mirTarbase | hsa-miR-15b-5p  | CARM1   | 10498 | ENSG00000142453 | 27292025 | validated |
| mirTarbase | hsa-miR-192-5p  | SEMA4D  | 10507 | ENSG00000187764 | 16822819 | validated |

|            |                 |          |       |                 |          |           |
|------------|-----------------|----------|-------|-----------------|----------|-----------|
| mirTarbase | hsa-miR-106b-5p | SEMA4B   | 10509 | ENSG00000185033 | 22473208 | validated |
| mirTarbase | hsa-miR-144-3p  | APPBP2   | 10513 | ENSG00000062725 | 23592263 | validated |
| mirTarbase | hsa-miR-192-5p  | CIB2     | 10518 | ENSG00000136425 | 19074876 | validated |
| mirTarbase | hsa-miR-106b-5p | DDX17    | 10521 | ENSG00000100201 | 23622248 | validated |
| mirTarbase | hsa-miR-192-5p  | DEAF1    | 10522 | ENSG00000177030 | 19074876 | validated |
| mirTarbase | hsa-miR-301a-3p | CHERP    | 10523 | ENSG00000085872 | 19536157 | validated |
| mirTarbase | hsa-miR-15b-5p  | HYOU1    | 10525 | ENSG00000149428 | 22473208 | validated |
| mirTarbase | hsa-miR-106b-5p | IPO7     | 10527 | ENSG00000205339 | 23622248 | validated |
| mirTarbase | hsa-miR-582-5p  | IPO7     | 10527 | ENSG00000205339 | 22012620 | validated |
| mirTarbase | hsa-miR-222-3p  | ZNRD2    | 10534 | ENSG00000173465 | 26446789 | validated |
| mirTarbase | hsa-miR-18a-5p  | DCTN2    | 10540 | ENSG00000175203 | 23622248 | validated |
| mirTarbase | hsa-miR-192-5p  | LAMTOR5  | 10542 | ENSG00000134248 | 19074876 | validated |
| mirTarbase | hsa-miR-505-3p  | TM9SF1   | 10548 | ENSG00000100926 | 23592263 | validated |
| mirTarbase | hsa-miR-222-3p  | PRDX4    | 10549 | ENSG00000123131 | 23622248 | validated |
| mirTarbase | hsa-miR-106b-5p | RPP30    | 10556 | ENSG00000148688 | 23622248 | validated |
| mirTarbase | hsa-miR-326     | SPTLC1   | 10558 | ENSG00000090054 | 21572407 | validated |
| mirTarbase | hsa-miR-15b-5p  | SPTLC1   | 10558 | ENSG00000090054 | 22473208 | validated |
| mirTarbase | hsa-miR-192-5p  | SLC19A2  | 10560 | ENSG00000117479 | 19074876 | validated |
| mirTarbase | hsa-miR-181a-5p | SLC19A2  | 10560 | ENSG00000117479 | 22473208 | validated |
| mirTarbase | hsa-miR-192-5p  | ARFGEF1  | 10565 | ENSG00000066777 | 19074876 | validated |
| mirTarbase | hsa-miR-18a-5p  | RABAC1   | 10567 | ENSG00000105404 | 23622248 | validated |
| mirTarbase | hsa-miR-505-3p  | CCT7     | 10574 | ENSG00000135624 | 23622248 | validated |
| mirTarbase | hsa-miR-144-3p  | CCT2     | 10576 | ENSG00000166226 | 23592263 | validated |
| mirTarbase | hsa-miR-106b-5p | TXNRD2   | 10587 | ENSG00000184470 | 23622248 | validated |
| mirTarbase | hsa-miR-192-5p  | SMC2     | 10592 | ENSG00000136824 | 19074876 | validated |
| mirTarbase | hsa-miR-222-3p  | SMC2     | 10592 | ENSG00000136824 | 19536157 | validated |
| mirTarbase | hsa-miR-192-5p  | TRAPPC2B | 10597 | ENSG00000256060 | 18835392 | validated |
| mirTarbase | hsa-miR-222-3p  | AHSA1    | 10598 | ENSG00000100591 | 23622248 | validated |
| mirTarbase | hsa-miR-106b-5p | USP16    | 10600 | ENSG00000156256 | 22473208 | validated |
| mirTarbase | hsa-miR-505-3p  | PAICS    | 10606 | ENSG00000128050 | 23622248 | validated |
| mirTarbase | hsa-miR-222-3p  | HEXIM1   | 10614 | ENSG00000186834 | 23622248 | validated |
| mirTarbase | hsa-miR-505-3p  | STAMPB   | 10617 | ENSG00000124356 | 23622248 | validated |
| mirTarbase | hsa-miR-144-3p  | STAMPB   | 10617 | ENSG00000124356 | 21572407 | validated |
| mirTarbase | hsa-miR-15b-5p  | TGOLN2   | 10618 | ENSG00000152291 | 23622248 | validated |
| mirTarbase | hsa-miR-106b-5p | TGOLN2   | 10618 | ENSG00000152291 | 22473208 | validated |
| mirTarbase | hsa-miR-106b-5p | POLR3F   | 10621 | ENSG00000132664 | 23824327 | validated |
| mirTarbase | hsa-miR-106b-5p | POLR3G   | 10622 | ENSG00000113356 | 22473208 | validated |
| mirTarbase | hsa-miR-21-5p   | IVNS1ABP | 10625 | ENSG00000116679 | 18591254 | validated |
| mirTarbase | hsa-miR-15b-5p  | IVNS1ABP | 10625 | ENSG00000116679 | 23592263 | validated |
| mirTarbase | hsa-miR-106b-5p | TXNIP    | 10628 | ENSG00000265972 | 22473208 | validated |
| mirTarbase | hsa-miR-301a-3p | TXNIP    | 10628 | ENSG00000265972 | 24398324 | validated |
| mirTarbase | hsa-miR-18a-5p  | TXNIP    | 10628 | ENSG00000265972 | 23592263 | validated |
| mirTarbase | hsa-miR-15b-5p  | TXNIP    | 10628 | ENSG00000265972 | 27292025 | validated |
| mirTarbase | hsa-miR-192-5p  | ATP5MG   | 10632 | ENSG00000167283 | 19074876 | validated |
| mirTarbase | hsa-miR-18a-5p  | RAD51AP1 | 10635 | ENSG00000111247 | 23592263 | validated |
| mirTarbase | hsa-miR-582-5p  | LEFTY1   | 10637 | ENSG00000243709 | 22012620 | validated |
| mirTarbase | hsa-miR-301a-3p | LEFTY1   | 10637 | ENSG00000243709 | 22012620 | validated |
| mirTarbase | hsa-miR-144-3p  | LEFTY1   | 10637 | ENSG00000243709 | 22012620 | validated |
| mirTarbase | hsa-miR-21-5p   | EXOC5    | 10640 | ENSG00000070367 | 18591254 | validated |
| mirTarbase | hsa-miR-18a-5p  | IGF2BP2  | 10644 | ENSG00000073792 | 16331254 | validated |
| mirTarbase | hsa-miR-505-3p  | SPINT2   | 10653 | ENSG00000167642 | 27292025 | validated |
| mirTarbase | hsa-miR-15b-5p  | DMRT2    | 10655 | ENSG00000173253 | 22100165 | validated |
| mirTarbase | hsa-miR-505-3p  | DMRT2    | 10655 | ENSG00000173253 | 19536157 | validated |
| mirTarbase | hsa-miR-192-5p  | KHDRBS3  | 10656 | ENSG00000131773 | 19074876 | validated |
| mirTarbase | hsa-miR-192-5p  | CTCF     | 10664 | ENSG00000102974 | 19074876 | validated |
| mirTarbase | hsa-miR-505-3p  | CD226    | 10666 | ENSG00000150637 | 23824327 | validated |
| mirTarbase | hsa-miR-212-3p  | CD226    | 10666 | ENSG00000150637 | 23824327 | validated |
| mirTarbase | hsa-miR-106b-5p | DCTN6    | 10671 | ENSG00000104671 | 23446348 | validated |
| mirTarbase | hsa-miR-192-5p  | TNFSF13B | 10673 | ENSG00000102524 | 19074876 | validated |
| mirTarbase | hsa-miR-15b-5p  | B3GNT2   | 10678 | ENSG00000170340 | 21572407 | validated |
| mirTarbase | hsa-miR-106b-5p | GNB5     | 10681 | ENSG00000069966 | 23313552 | validated |
| mirTarbase | hsa-miR-505-3p  | PNMA2    | 10687 | ENSG00000240694 | 23446348 | validated |
| mirTarbase | hsa-miR-301a-3p | CCT8     | 10694 | ENSG00000156261 | 23622248 | validated |
| mirTarbase | hsa-miR-15b-5p  | TBR1     | 10716 | ENSG00000136535 | 27499071 | validated |
| mirTarbase | hsa-miR-192-5p  | POLQ     | 10721 | ENSG00000051341 | 19074876 | validated |
| mirTarbase | hsa-miR-106b-5p | POLQ     | 10721 | ENSG00000051341 | 22473208 | validated |
| mirTarbase | hsa-miR-296-5p  | SLC12A7  | 10723 | ENSG00000113504 | 22012620 | validated |
| mirTarbase | hsa-miR-301a-3p | SLC12A7  | 10723 | ENSG00000113504 | 22012620 | validated |
| mirTarbase | hsa-miR-21-5p   | NFAT5    | 10725 | ENSG00000102908 | 18591254 | validated |
| mirTarbase | hsa-miR-106b-5p | NFAT5    | 10725 | ENSG00000102908 | 22473208 | validated |
| mirTarbase | hsa-miR-106b-5p | PTGES3   | 10728 | ENSG00000110958 | 22473208 | validated |

|            |                 |          |       |                 |          |           |
|------------|-----------------|----------|-------|-----------------|----------|-----------|
| mirtarbase | hsa-miR-21-5p   | YME1L1   | 10730 | ENSG00000136758 | 18591254 | validated |
| mirtarbase | hsa-miR-192-5p  | YME1L1   | 10730 | ENSG00000136758 | 23824327 | validated |
| mirtarbase | hsa-miR-192-5p  | TCFL5    | 10732 | ENSG00000101190 | 19074876 | validated |
| mirtarbase | hsa-miR-192-5p  | PLK4     | 10733 | ENSG00000142731 | 19074876 | validated |
| mirtarbase | hsa-miR-21-5p   | STAG2    | 10735 | ENSG00000101972 | 20371350 | validated |
| mirtarbase | hsa-miR-181a-5p | STAG2    | 10735 | ENSG00000101972 | 23622248 | validated |
| mirtarbase | hsa-miR-192-5p  | PHTF1    | 10745 | ENSG00000116793 | 19074876 | validated |
| mirtarbase | hsa-miR-21-5p   | PHTF1    | 10745 | ENSG00000116793 | 18591254 | validated |
| mirtarbase | hsa-miR-21-5p   | MAP3K2   | 10746 | ENSG00000169967 | 18591254 | validated |
| mirtarbase | hsa-miR-106b-5p | MAP3K2   | 10746 | ENSG00000169967 | 22473208 | validated |
| mirtarbase | hsa-miR-181a-5p | CHL1     | 10752 | ENSG00000134121 | 17612493 | validated |
| mirtarbase | hsa-miR-106b-5p | TRAF3IP2 | 10758 | ENSG00000056972 | 23313552 | validated |
| mirtarbase | hsa-miR-15b-5p  | NUP50    | 10762 | ENSG00000093000 | 22473208 | validated |
| mirtarbase | hsa-miR-212-3p  | NUP50    | 10762 | ENSG00000093000 | 21572407 | validated |
| mirtarbase | hsa-miR-15b-5p  | TOB2     | 10766 | ENSG00000183864 | 23592263 | validated |
| mirtarbase | hsa-miR-192-5p  | ZMYND11  | 10771 | ENSG00000015171 | 19074876 | validated |
| mirtarbase | hsa-miR-222-3p  | ZMYND11  | 10771 | ENSG00000015171 | 23622248 | validated |
| mirtarbase | hsa-miR-296-5p  | SRSF10   | 10772 | ENSG00000188529 | 19536157 | validated |
| mirtarbase | hsa-miR-192-5p  | ZBTB6    | 10773 | ENSG00000186130 | 19074876 | validated |
| mirtarbase | hsa-miR-106b-5p | ZBTB6    | 10773 | ENSG00000186130 | 22473208 | validated |
| mirtarbase | hsa-miR-181a-5p | ZNF266   | 10781 | ENSG00000174652 | 21572407 | validated |
| mirtarbase | hsa-miR-582-5p  | NCKAP1   | 10787 | ENSG00000061676 | 23592263 | validated |
| mirtarbase | hsa-miR-15b-5p  | NCKAP1   | 10787 | ENSG00000061676 | 20371350 | validated |
| mirtarbase | hsa-miR-192-5p  | ZNF273   | 10793 | ENSG00000198039 | 19074876 | validated |
| mirtarbase | hsa-miR-222-3p  | ZNF460   | 10794 | ENSG00000197714 | 23622248 | validated |
| mirtarbase | hsa-miR-15b-5p  | ZNF460   | 10794 | ENSG00000197714 | 23592263 | validated |
| mirtarbase | hsa-miR-21-5p   | ZNF460   | 10794 | ENSG00000197714 | 23446348 | validated |
| mirtarbase | hsa-miR-18a-5p  | ZNF460   | 10794 | ENSG00000197714 | 21572407 | validated |
| mirtarbase | hsa-miR-181a-5p | ZNF268   | 10795 | ENSG00000090612 | 20371350 | validated |
| mirtarbase | hsa-miR-326     | MTHFD2   | 10797 | ENSG00000065911 | 23824327 | validated |
| mirtarbase | hsa-miR-15b-5p  | SEC24A   | 10802 | ENSG00000113615 | 23592263 | validated |
| mirtarbase | hsa-miR-21-5p   | FRS2     | 10818 | ENSG00000166225 | 22012620 | validated |
| mirtarbase | hsa-miR-106b-5p | FRS2     | 10818 | ENSG00000166225 | 21572407 | validated |
| mirtarbase | hsa-miR-21-5p   | FAXDC2   | 10826 | ENSG00000170271 | 18591254 | validated |
| mirtarbase | hsa-miR-15b-5p  | ZNF275   | 10838 | ENSG00000063587 | 21572407 | validated |
| mirtarbase | hsa-miR-222-3p  | ZNF275   | 10838 | ENSG00000063587 | 21572407 | validated |
| mirtarbase | hsa-miR-106b-5p | SRCAP    | 10847 | ENSG00000080603 | 23824327 | validated |
| mirtarbase | hsa-miR-106b-5p | HCP5     | 10866 |                 | 22473208 | validated |
| mirtarbase | hsa-miR-192-5p  | NMU      | 10874 | ENSG00000109255 | 19074876 | validated |
| mirtarbase | hsa-miR-181a-5p | GPR83    | 10888 | ENSG00000123901 | 17612493 | validated |
| mirtarbase | hsa-miR-106b-5p | RAB10    | 10890 | ENSG00000084733 | 21572407 | validated |
| mirtarbase | hsa-miR-21-5p   | MALT1    | 10892 | ENSG00000172175 | 18591254 | validated |
| mirtarbase | hsa-miR-222-3p  | JTB      | 10899 | ENSG00000143543 | 23622248 | validated |
| mirtarbase | hsa-miR-301a-3p | BLCAP    | 10904 | ENSG00000166619 | 23592263 | validated |
| mirtarbase | hsa-miR-181a-5p | MAN1A2   | 10905 | ENSG00000198162 | 23446348 | validated |
| mirtarbase | hsa-miR-15b-5p  | PNPLA6   | 10908 | ENSG00000032444 | 23592263 | validated |
| mirtarbase | hsa-miR-181a-5p | GADD45G  | 10912 | ENSG00000130222 | 17612493 | validated |
| mirtarbase | hsa-miR-222-3p  | TCERG1   | 10915 | ENSG00000113649 | 23622248 | validated |
| mirtarbase | hsa-miR-106b-5p | RNPS1    | 10921 | ENSG00000205937 | 23622248 | validated |
| mirtarbase | hsa-miR-222-3p  | RNPS1    | 10921 | ENSG00000205937 | 21572407 | validated |
| mirtarbase | hsa-miR-15b-5p  | RNPS1    | 10921 | ENSG00000205937 | 22473208 | validated |
| mirtarbase | hsa-miR-505-3p  | SUB1     | 10923 | ENSG00000113387 | 21572407 | validated |
| mirtarbase | hsa-miR-21-5p   | SPIN1    | 10927 | ENSG00000106723 | 18591254 | validated |
| mirtarbase | hsa-miR-222-3p  | MORF4L1  | 10933 | ENSG00000185787 | 23622248 | validated |
| mirtarbase | hsa-miR-106b-5p | MORF4L1  | 10933 | ENSG00000185787 | 23446348 | validated |
| mirtarbase | hsa-miR-181a-5p | PRDX3    | 10935 | ENSG00000165672 | 17612493 | validated |
| mirtarbase | hsa-miR-15b-5p  | PRDX3    | 10935 | ENSG00000165672 | 23622248 | validated |
| mirtarbase | hsa-miR-301a-3p | GPR75    | 10936 | ENSG00000119737 | 27292025 | validated |
| mirtarbase | hsa-miR-15b-5p  | PRSS21   | 10942 | ENSG00000007038 | 21572407 | validated |
| mirtarbase | hsa-miR-18a-5p  | MSL3     | 10943 | ENSG00000005302 | 23622248 | validated |
| mirtarbase | hsa-miR-301a-3p | KDELRL1  | 10945 | ENSG00000105438 | 23824327 | validated |
| mirtarbase | hsa-miR-192-5p  | AP3M2    | 10947 | ENSG00000070718 | 19074876 | validated |
| mirtarbase | hsa-miR-181a-5p | AP3M2    | 10947 | ENSG00000070718 | 23824327 | validated |
| mirtarbase | hsa-miR-106b-5p | BTG3     | 10950 | ENSG00000281484 | 17242205 | validated |
| mirtarbase | hsa-miR-106b-5p | CBX1     | 10951 | ENSG00000108468 | 21572407 | validated |
| mirtarbase | hsa-miR-301a-3p | SERINC3  | 10955 | ENSG00000132824 | 23592263 | validated |
| mirtarbase | hsa-miR-301a-3p | PNRC1    | 10957 | ENSG00000146278 | 23592263 | validated |
| mirtarbase | hsa-miR-106b-5p | PNRC1    | 10957 | ENSG00000146278 | 23824327 | validated |
| mirtarbase | hsa-miR-192-5p  | RAB40B   | 10966 | ENSG00000141542 | 19074876 | validated |
| mirtarbase | hsa-miR-15b-5p  | RAB40B   | 10966 | ENSG00000141542 | 22473208 | validated |
| mirtarbase | hsa-miR-505-3p  | EBNA1BP2 | 10969 | ENSG00000117395 | 23622248 | validated |

|            |                 |          |       |                 |          |           |
|------------|-----------------|----------|-------|-----------------|----------|-----------|
| mirTarbase | hsa-miR-192-5p  | CKAP4    | 10970 | ENSG00000136026 | 19074876 | validated |
| mirTarbase | hsa-miR-15b-5p  | YWHAQ    | 10971 | ENSG00000134308 | 21572407 | validated |
| mirTarbase | hsa-miR-192-5p  | TMED10   | 10972 | ENSG00000170348 | 19074876 | validated |
| mirTarbase | hsa-miR-21-5p   | FERMT2   | 10979 | ENSG00000073712 | 20371350 | validated |
| mirTarbase | hsa-miR-222-3p  | GCN1     | 10985 | ENSG00000089154 | 23622248 | validated |
| mirTarbase | hsa-miR-326     | SLC27A4  | 10999 | ENSG00000167114 | 23824327 | validated |
| mirTarbase | hsa-miR-181a-5p | KIF2C    | 11004 | ENSG00000142945 | 22473208 | validated |
| mirTarbase | hsa-miR-301a-3p | KDELRL2  | 11014 | ENSG00000136240 | 23622248 | validated |
| mirTarbase | hsa-miR-106b-5p | LIAS     | 11019 | ENSG00000121897 | 23824327 | validated |
| mirTarbase | hsa-miR-301a-3p | LILRA2   | 11027 | ENSG00000275290 | 23824327 | validated |
| mirTarbase | hsa-miR-192-5p  | TENT4A   | 11044 | ENSG00000112941 | 19074876 | validated |
| mirTarbase | hsa-miR-582-5p  | TENT4A   | 11044 | ENSG00000112941 | 23592263 | validated |
| mirTarbase | hsa-miR-192-5p  | CPSF6    | 11052 | ENSG00000111605 | 19074876 | validated |
| mirTarbase | hsa-miR-222-3p  | CPSF6    | 11052 | ENSG00000111605 | 20371350 | validated |
| mirTarbase | hsa-miR-505-3p  | OGFR     | 11054 | ENSG00000060491 | 23622248 | validated |
| mirTarbase | hsa-miR-181a-5p | DDX52    | 11056 | ENSG00000278053 | 22473208 | validated |
| mirTarbase | hsa-miR-106b-5p | ABHD2    | 11057 | ENSG00000140526 | 22473208 | validated |
| mirTarbase | hsa-miR-15b-5p  | ABHD2    | 11057 | ENSG00000140526 | 23592263 | validated |
| mirTarbase | hsa-miR-21-5p   | WWP1     | 11059 | ENSG00000123124 | 22227207 | validated |
| mirTarbase | hsa-miR-21-5p   | CNTRL    | 11064 | ENSG00000119397 | 18591254 | validated |
| mirTarbase | hsa-miR-582-5p  | SNRNP35  | 11066 | ENSG00000184209 | 27292025 | validated |
| mirTarbase | hsa-miR-106b-5p | RAPGEF4  | 11069 | ENSG00000091428 | 22473208 | validated |
| mirTarbase | hsa-miR-192-5p  | TOPBP1   | 11073 | ENSG00000163781 | 19074876 | validated |
| mirTarbase | hsa-miR-181a-5p | TOPBP1   | 11073 | ENSG00000163781 | 23313552 | validated |
| mirTarbase | hsa-miR-106b-5p | TRIOBP   | 11078 | ENSG00000100106 | 23313552 | validated |
| mirTarbase | hsa-miR-192-5p  | DNAJB4   | 11080 | ENSG00000162616 | 19074876 | validated |
| mirTarbase | hsa-miR-106b-5p | DNAJB4   | 11080 | ENSG00000162616 | 23313552 | validated |
| mirTarbase | hsa-miR-582-5p  | DIDO1    | 11083 | ENSG00000101191 | 21572407 | validated |
| mirTarbase | hsa-miR-144-3p  | DIDO1    | 11083 | ENSG00000101191 | 21572407 | validated |
| mirTarbase | hsa-miR-296-5p  | ADAMTS13 | 11093 | ENSG00000160323 | 23824327 | validated |
| mirTarbase | hsa-miR-192-5p  | PRSS23   | 11098 | ENSG00000150687 | 19074876 | validated |
| mirTarbase | hsa-miR-326     | RPP14    | 11102 | ENSG00000163684 | 23622248 | validated |
| mirTarbase | hsa-miR-582-3p  | KRR1     | 11103 | ENSG00000111615 | 23313552 | validated |
| mirTarbase | hsa-miR-192-5p  | PRDM4    | 11108 | ENSG00000110851 | 19074876 | validated |
| mirTarbase | hsa-miR-15b-5p  | PRDM4    | 11108 | ENSG00000110851 | 21572407 | validated |
| mirTarbase | hsa-miR-192-5p  | HIBADH   | 11112 | ENSG00000106049 | 19074876 | validated |
| mirTarbase | hsa-miR-192-5p  | CIT      | 11113 | ENSG00000122966 | 19074876 | validated |
| mirTarbase | hsa-miR-106b-5p | CIT      | 11113 | ENSG00000122966 | 22473208 | validated |
| mirTarbase | hsa-miR-192-5p  | FGFR10P  | 11116 | ENSG00000213066 | 19074876 | validated |
| mirTarbase | hsa-miR-301a-3p | FGFR10P  | 11116 | ENSG00000213066 | 20371350 | validated |
| mirTarbase | hsa-miR-106b-5p | FGFR10P  | 11116 | ENSG00000213066 | 20371350 | validated |
| mirTarbase | hsa-miR-106b-5p | BTN3A2   | 11118 | ENSG00000186470 | 22473208 | validated |
| mirTarbase | hsa-miR-106b-5p | BTN3A1   | 11119 | ENSG00000026950 | 22473208 | validated |
| mirTarbase | hsa-miR-15b-5p  | RCAN3    | 11123 | ENSG00000117602 | 23446348 | validated |
| mirTarbase | hsa-miR-106b-5p | POLR3A   | 11128 | ENSG00000148606 | 21572407 | validated |
| mirTarbase | hsa-miR-106b-5p | KAT7     | 11143 | ENSG00000136504 | 23622248 | validated |
| mirTarbase | hsa-miR-18a-5p  | BVES     | 11149 | ENSG00000112276 | 23622248 | validated |
| mirTarbase | hsa-miR-326     | BVES     | 11149 | ENSG00000112276 | 23824327 | validated |
| mirTarbase | hsa-miR-222-3p  | CORO1A   | 11151 | ENSG00000102879 | 21226887 | validated |
| mirTarbase | hsa-miR-106b-5p | FICD     | 11153 | ENSG00000198855 | 21572407 | validated |
| mirTarbase | hsa-miR-222-3p  | FICD     | 11153 | ENSG00000198855 | 21572407 | validated |
| mirTarbase | hsa-miR-15b-5p  | AP4S1    | 11154 | ENSG00000100478 | 23622248 | validated |
| mirTarbase | hsa-miR-192-5p  | PTP4A3   | 11156 | ENSG00000275575 | 16822819 | validated |
| mirTarbase | hsa-miR-192-5p  | ERLIN2   | 11160 | ENSG00000147475 | 16822819 | validated |
| mirTarbase | hsa-miR-326     | ERLIN2   | 11160 | ENSG00000147475 | 23622248 | validated |
| mirTarbase | hsa-miR-106b-5p | NUDT3    | 11165 | ENSG00000272325 | 23313552 | validated |
| mirTarbase | hsa-miR-192-5p  | NUDT3    | 11165 | ENSG00000272325 | 27292025 | validated |
| mirTarbase | hsa-miR-15b-5p  | BAZ2A    | 11176 | ENSG00000076108 | 21572407 | validated |
| mirTarbase | hsa-miR-181a-5p | BAZ2A    | 11176 | ENSG00000076108 | 22473208 | validated |
| mirTarbase | hsa-miR-222-3p  | WDR6     | 11180 | ENSG00000178252 | 23622248 | validated |
| mirTarbase | hsa-miR-181a-5p | RASSF1   | 11186 | ENSG00000068028 | 26041820 | validated |
| mirTarbase | hsa-miR-222-3p  | CEP250   | 11190 | ENSG00000126001 | 23622248 | validated |
| mirTarbase | hsa-miR-106b-5p | PTENP1   | 11191 |                 | 28212532 | validated |
| mirTarbase | hsa-miR-181a-5p | WIF1     | 11197 | ENSG00000156076 | 24755295 | validated |
| mirTarbase | hsa-miR-15b-5p  | SUPT16H  | 11198 | ENSG00000092201 | 22473208 | validated |
| mirTarbase | hsa-miR-301a-3p | CHEK2    | 11200 | ENSG00000183765 | 21572407 | validated |
| mirTarbase | hsa-miR-181a-5p | PLPBP    | 11212 | ENSG00000147471 | 17612493 | validated |
| mirTarbase | hsa-miR-15b-5p  | PLPBP    | 11212 | ENSG00000147471 | 20371350 | validated |
| mirTarbase | hsa-miR-106b-5p | AKAP11   | 11215 | ENSG00000023516 | 17242205 | validated |
| mirTarbase | hsa-miR-192-5p  | AKAP11   | 11215 | ENSG00000023516 | 19074876 | validated |
| mirTarbase | hsa-miR-15b-5p  | AKAP11   | 11215 | ENSG00000023516 | 22473208 | validated |

|            |                 |           |       |                 |          |           |
|------------|-----------------|-----------|-------|-----------------|----------|-----------|
| mirTarbase | hsa-miR-21-5p   | DUSP10    | 11221 | ENSG00000143507 | 22387553 | validated |
| mirTarbase | hsa-miR-192-5p  | RASSF8    | 11228 | ENSG00000123094 | 19074876 | validated |
| mirTarbase | hsa-miR-192-5p  | SEC63     | 11231 | ENSG00000025796 | 19074876 | validated |
| mirTarbase | hsa-miR-21-5p   | SEC63     | 11231 | ENSG00000025796 | 18591254 | validated |
| mirTarbase | hsa-miR-21-5p   | HPS5      | 11234 | ENSG00000110756 | 18591254 | validated |
| mirTarbase | hsa-miR-21-5p   | FILIP1L   | 11259 | ENSG00000168386 | 20371350 | validated |
| mirTarbase | hsa-miR-144-3p  | CHP1      | 11261 | ENSG00000187446 | 26701625 | validated |
| mirTarbase | hsa-miR-582-5p  | DDX19B    | 11269 | ENSG00000157349 | 27292025 | validated |
| mirTarbase | hsa-miR-181a-5p | PRR4      | 11272 | ENSG00000263247 | 17612493 | validated |
| mirTarbase | hsa-miR-326     | ATXN2L    | 11273 | ENSG00000168488 | 23622248 | validated |
| mirTarbase | hsa-miR-192-5p  | USP18     | 11274 | ENSG00000184979 | 19074876 | validated |
| mirTarbase | hsa-miR-326     | SYNRG     | 11276 | ENSG00000275066 | 23824327 | validated |
| mirTarbase | hsa-miR-15b-5p  | SYNRG     | 11276 | ENSG00000275066 | 19536157 | validated |
| mirTarbase | hsa-miR-222-3p  | MGAT4B    | 11282 | ENSG00000161013 | 23622248 | validated |
| mirTarbase | hsa-miR-222-3p  | PARK7     | 11315 | ENSG00000116288 | 23622248 | validated |
| mirTarbase | hsa-miR-21-5p   | MGAT4A    | 11320 | ENSG00000071073 | 18591254 | validated |
| mirTarbase | hsa-miR-15b-5p  | STK38     | 11329 | ENSG00000112079 | 23592263 | validated |
| mirTarbase | hsa-miR-181a-5p | PDAP1     | 11333 | ENSG00000106244 | 22942087 | validated |
| mirTarbase | hsa-miR-15b-5p  | GABARAP   | 11337 | ENSG00000170296 | 22473208 | validated |
| mirTarbase | hsa-miR-222-3p  | OIP5      | 11339 | ENSG00000104147 | 22100165 | validated |
| mirTarbase | hsa-miR-15b-5p  | OIP5      | 11339 | ENSG00000104147 | 28184024 | validated |
| mirTarbase | hsa-miR-144-3p  | Adamts1   | 11504 |                 | 25151965 | validated |
| mirTarbase | hsa-miR-222-3p  | CASC3     | 22794 | ENSG00000108349 | 23622248 | validated |
| mirTarbase | hsa-miR-106b-5p | RRAS2     | 22800 | ENSG00000133818 | 20371350 | validated |
| mirTarbase | hsa-miR-222-3p  | ATF5      | 22809 | ENSG00000169136 | 23622248 | validated |
| mirTarbase | hsa-miR-181a-5p | PHLDA1    | 22822 | ENSG00000139289 | 22815788 | validated |
| mirTarbase | hsa-miR-15b-5p  | HSPA4L    | 22824 | ENSG00000164070 | 24398324 | validated |
| mirTarbase | hsa-miR-106b-5p | HSPA4L    | 22824 | ENSG00000164070 | 21572407 | validated |
| mirTarbase | hsa-miR-181a-5p | ZNF652    | 22834 | ENSG00000198740 | 17612493 | validated |
| mirTarbase | hsa-miR-192-5p  | ZNF652    | 22834 | ENSG00000198740 | 19074876 | validated |
| mirTarbase | hsa-miR-106b-5p | ZNF652    | 22834 | ENSG00000198740 | 23592263 | validated |
| mirTarbase | hsa-miR-222-3p  | ZNF652    | 22834 | ENSG00000198740 | 23446348 | validated |
| mirTarbase | hsa-miR-505-3p  | ZNF652    | 22834 | ENSG00000198740 | 23824327 | validated |
| mirTarbase | hsa-miR-192-5p  | ZFP30     | 22835 | ENSG00000120784 | 19074876 | validated |
| mirTarbase | hsa-miR-222-3p  | ZFP30     | 22835 | ENSG00000120784 | 21572407 | validated |
| mirTarbase | hsa-miR-192-5p  | RHOBTB3   | 22836 | ENSG00000164292 | 19074876 | validated |
| mirTarbase | hsa-miR-192-5p  | COBLL1    | 22837 | ENSG00000082438 | 19074876 | validated |
| mirTarbase | hsa-miR-21-5p   | COBLL1    | 22837 | ENSG00000082438 | 18591254 | validated |
| mirTarbase | hsa-miR-296-5p  | RNF44     | 22838 | ENSG00000146083 | 20371350 | validated |
| mirTarbase | hsa-miR-192-5p  | RAB11FIP2 | 22841 | ENSG00000107560 | 19074876 | validated |
| mirTarbase | hsa-miR-21-5p   | RAB11FIP2 | 22841 | ENSG00000107560 | 18591254 | validated |
| mirTarbase | hsa-miR-15b-5p  | RAB11FIP2 | 22841 | ENSG00000107560 | 22473208 | validated |
| mirTarbase | hsa-miR-18a-5p  | ZNF507    | 22847 | ENSG00000168813 | 20371350 | validated |
| mirTarbase | hsa-miR-106b-5p | AAK1      | 22848 | ENSG00000115977 | 22473208 | validated |
| mirTarbase | hsa-miR-21-5p   | CPEB3     | 22849 | ENSG00000107864 | 18591254 | validated |
| mirTarbase | hsa-miR-15b-5p  | CPEB3     | 22849 | ENSG00000107864 | 22473208 | validated |
| mirTarbase | hsa-miR-106b-5p | CHSY1     | 22856 | ENSG00000131873 | 23592263 | validated |
| mirTarbase | hsa-miR-192-5p  | ICK       | 22858 | ENSG00000112144 | 19074876 | validated |
| mirTarbase | hsa-miR-144-3p  | FNDC3A    | 22862 | ENSG00000102531 | 23592263 | validated |
| mirTarbase | hsa-miR-106b-5p | ATG14     | 22863 | ENSG00000126775 | 22473208 | validated |
| mirTarbase | hsa-miR-15b-5p  | ATG14     | 22863 | ENSG00000126775 | 23446348 | validated |
| mirTarbase | hsa-miR-301a-3p | PPP6R1    | 22870 | ENSG00000105063 | 23592263 | validated |
| mirTarbase | hsa-miR-192-5p  | ENPP4     | 22875 | ENSG00000001561 | 19074876 | validated |
| mirTarbase | hsa-miR-301a-3p | ENPP4     | 22875 | ENSG00000001561 | 21572407 | validated |
| mirTarbase | hsa-miR-192-5p  | INPP5F    | 22876 | ENSG00000198825 | 19074876 | validated |
| mirTarbase | hsa-miR-106b-5p | INPP5F    | 22876 | ENSG00000198825 | 22473208 | validated |
| mirTarbase | hsa-miR-106b-5p | MLXIP     | 22877 | ENSG00000175727 | 22473208 | validated |
| mirTarbase | hsa-miR-15b-5p  | MLXIP     | 22877 | ENSG00000175727 | 22473208 | validated |
| mirTarbase | hsa-miR-192-5p  | ANKRD6    | 22881 | ENSG00000135299 | 19074876 | validated |
| mirTarbase | hsa-miR-192-5p  | CLSTN1    | 22883 | ENSG00000171603 | 19074876 | validated |
| mirTarbase | hsa-miR-106b-5p | WDR37     | 22884 | ENSG00000047056 | 22473208 | validated |
| mirTarbase | hsa-miR-106b-5p | FOXJ3     | 22887 | ENSG00000198815 | 22473208 | validated |
| mirTarbase | hsa-miR-106b-5p | UBOX5     | 22888 | ENSG00000185019 | 23313552 | validated |
| mirTarbase | hsa-miR-18a-5p  | KHDC4     | 22889 | ENSG00000132680 | 20371350 | validated |
| mirTarbase | hsa-miR-505-3p  | BAHD1     | 22893 | ENSG00000140320 | 23313552 | validated |
| mirTarbase | hsa-miR-192-5p  | RUFY3     | 22902 | ENSG00000018189 | 19074876 | validated |
| mirTarbase | hsa-miR-21-5p   | RUFY3     | 22902 | ENSG00000018189 | 18591254 | validated |
| mirTarbase | hsa-miR-505-3p  | RUFY3     | 22902 | ENSG00000018189 | 23622248 | validated |
| mirTarbase | hsa-miR-181a-5p | BTBD3     | 22903 | ENSG00000132640 | 17612493 | validated |
| mirTarbase | hsa-miR-21-5p   | BTBD3     | 22903 | ENSG00000132640 | 18591254 | validated |
| mirTarbase | hsa-miR-301a-3p | BTBD3     | 22903 | ENSG00000132640 | 23592263 | validated |



|            |                 |          |       |                 |          |           |
|------------|-----------------|----------|-------|-----------------|----------|-----------|
| mirTarbase | hsa-miR-15b-5p  | TRAK1    | 22906 | ENSG00000182606 | 23824327 | validated |
| mirTarbase | hsa-miR-15b-5p  | DHX30    | 22907 | ENSG00000132153 | 23622248 | validated |
| mirTarbase | hsa-miR-21-5p   | SACM1L   | 22908 | ENSG00000211456 | 18591254 | validated |
| mirTarbase | hsa-miR-192-5p  | WDR47    | 22911 | ENSG00000085433 | 19074876 | validated |
| mirTarbase | hsa-miR-192-5p  | NCBP2    | 22916 | ENSG00000114503 | 20371350 | validated |
| mirTarbase | hsa-miR-21-5p   | KIFAP3   | 22920 | ENSG00000075945 | 18591254 | validated |
| mirTarbase | hsa-miR-106b-5p | MAPRE3   | 22924 | ENSG00000084764 | 24398324 | validated |
| mirTarbase | hsa-miR-301a-3p | MAPRE3   | 22924 | ENSG00000084764 | 24398324 | validated |
| mirTarbase | hsa-miR-301a-3p | HABP4    | 22927 | ENSG00000130956 | 22012620 | validated |
| mirTarbase | hsa-miR-212-3p  | RAB18    | 22931 | ENSG00000099246 | 22012620 | validated |
| mirTarbase | hsa-miR-21-5p   | SIRT2    | 22933 | ENSG00000068903 | 24161395 | validated |
| mirTarbase | hsa-miR-192-5p  | ELL2     | 22936 | ENSG00000118985 | 19074876 | validated |
| mirTarbase | hsa-miR-301a-3p | ELL2     | 22936 | ENSG00000118985 | 23592263 | validated |
| mirTarbase | hsa-miR-144-3p  | ELL2     | 22936 | ENSG00000118985 | 23592263 | validated |
| mirTarbase | hsa-miR-106b-5p | TRIM32   | 22954 | ENSG00000119401 | 22473208 | validated |
| mirTarbase | hsa-miR-192-5p  | SCMH1    | 22955 | ENSG00000010803 | 19074876 | validated |
| mirTarbase | hsa-miR-21-5p   | NT5C2    | 22978 | ENSG00000076685 | 18591254 | validated |
| mirTarbase | hsa-miR-505-3p  | DIP2C    | 22982 | ENSG00000151240 | 23622248 | validated |
| mirTarbase | hsa-miR-18a-5p  | ACIN1    | 22985 | ENSG00000100813 | 20371350 | validated |
| mirTarbase | hsa-miR-106b-5p | ACIN1    | 22985 | ENSG00000100813 | 23622248 | validated |
| mirTarbase | hsa-miR-326     | MYH15    | 22989 | ENSG00000144821 | 28735896 | validated |
| mirTarbase | hsa-miR-21-5p   | CEP152   | 22995 | ENSG00000103995 | 18591254 | validated |
| mirTarbase | hsa-miR-192-5p  | LIMCH1   | 22998 | ENSG00000064042 | 19074876 | validated |
| mirTarbase | hsa-miR-21-5p   | LIMCH1   | 22998 | ENSG00000064042 | 18591254 | validated |
| mirTarbase | hsa-miR-181a-5p | WDFY3    | 23001 | ENSG00000163625 | 27418678 | validated |
| mirTarbase | hsa-miR-21-5p   | DAAM1    | 23002 | ENSG00000100592 | 18591254 | validated |
| mirTarbase | hsa-miR-15b-5p  | KLHDC10  | 23008 | ENSG00000128607 | 22473208 | validated |
| mirTarbase | hsa-miR-222-3p  | KLHDC10  | 23008 | ENSG00000128607 | 26701625 | validated |
| mirTarbase | hsa-miR-296-5p  | KLHDC10  | 23008 | ENSG00000128607 | 26701625 | validated |
| mirTarbase | hsa-miR-106b-5p | SPEN     | 23013 | ENSG00000065526 | 23622248 | validated |
| mirTarbase | hsa-miR-18a-5p  | SPEN     | 23013 | ENSG00000065526 | 26701625 | validated |
| mirTarbase | hsa-miR-222-3p  | FBXO21   | 23014 | ENSG00000135108 | 23622248 | validated |
| mirTarbase | hsa-miR-106b-5p | FBXO21   | 23014 | ENSG00000135108 | 22473208 | validated |
| mirTarbase | hsa-miR-21-5p   | PALLD    | 23022 | ENSG00000129116 | 18591254 | validated |
| mirTarbase | hsa-miR-181a-5p | TMCC1    | 23023 | ENSG00000172765 | 21572407 | validated |
| mirTarbase | hsa-miR-222-3p  | TMCC1    | 23023 | ENSG00000172765 | 20371350 | validated |
| mirTarbase | hsa-miR-106b-5p | PHLPP2   | 23035 | ENSG00000040199 | 22473208 | validated |
| mirTarbase | hsa-miR-15b-5p  | PHLPP2   | 23035 | ENSG00000040199 | 21572407 | validated |
| mirTarbase | hsa-miR-181a-5p | PHLPP2   | 23035 | ENSG00000040199 | 27915346 | validated |
| mirTarbase | hsa-miR-21-5p   | ZNF292   | 23036 | ENSG00000188994 | 18591254 | validated |
| mirTarbase | hsa-miR-21-5p   | MON2     | 23041 | ENSG00000061987 | 18591254 | validated |
| mirTarbase | hsa-miR-222-3p  | PDXDC1   | 23042 | ENSG00000275498 | 23622248 | validated |
| mirTarbase | hsa-miR-192-5p  | FNBP1    | 23048 | ENSG00000187239 | 19074876 | validated |
| mirTarbase | hsa-miR-21-5p   | FNBP1    | 23048 | ENSG00000187239 | 18591254 | validated |
| mirTarbase | hsa-miR-106b-5p | FNBP1    | 23048 | ENSG00000187239 | 23622248 | validated |
| mirTarbase | hsa-miR-181a-5p | SMG1     | 23049 | ENSG00000157106 | 23622248 | validated |
| mirTarbase | hsa-miR-192-5p  | ENDOD1   | 23052 | ENSG00000149218 | 19074876 | validated |
| mirTarbase | hsa-miR-18a-5p  | NCOA6    | 23054 | ENSG00000198646 | 20371350 | validated |
| mirTarbase | hsa-miR-181a-5p | CLUAP1   | 23059 | ENSG00000103351 | 17612493 | validated |
| mirTarbase | hsa-miR-192-5p  | EMC1     | 23065 | ENSG00000127463 | 19074876 | validated |
| mirTarbase | hsa-miR-106b-5p | EMC1     | 23065 | ENSG00000127463 | 22100165 | validated |
| mirTarbase | hsa-miR-222-3p  | SETD1B   | 23067 | ENSG00000139718 | 23622248 | validated |
| mirTarbase | hsa-miR-15b-5p  | SETD1B   | 23067 | ENSG00000139718 | 20371350 | validated |
| mirTarbase | hsa-miR-21-5p   | SETD1B   | 23067 | ENSG00000139718 | 23592263 | validated |
| mirTarbase | hsa-miR-296-5p  | SETD1B   | 23067 | ENSG00000139718 | 23592263 | validated |
| mirTarbase | hsa-miR-21-5p   | ERP44    | 23071 | ENSG00000023318 | 22100165 | validated |
| mirTarbase | hsa-miR-505-3p  | RRP1B    | 23076 | ENSG00000160208 | 23622248 | validated |
| mirTarbase | hsa-miR-21-5p   | MYCBP2   | 23077 | ENSG00000005810 | 18591254 | validated |
| mirTarbase | hsa-miR-15b-5p  | MYCBP2   | 23077 | ENSG00000005810 | 23622248 | validated |
| mirTarbase | hsa-miR-15b-5p  | AVL9     | 23080 | ENSG00000105778 | 23592263 | validated |
| mirTarbase | hsa-miR-222-3p  | PPRC1    | 23082 | ENSG00000148840 | 23622248 | validated |
| mirTarbase | hsa-miR-18a-5p  | EXPH5    | 23086 | ENSG00000110723 | 26233958 | validated |
| mirTarbase | hsa-miR-15b-5p  | TRIM35   | 23087 | ENSG00000104228 | 23446348 | validated |
| mirTarbase | hsa-miR-18a-5p  | TRIM35   | 23087 | ENSG00000104228 | 27292025 | validated |
| mirTarbase | hsa-miR-15b-5p  | TTL5     | 23093 | ENSG00000119685 | 20371350 | validated |
| mirTarbase | hsa-miR-18a-5p  | CDK19    | 23097 | ENSG00000155111 | 22308110 | validated |
| mirTarbase | hsa-miR-21-5p   | CDK19    | 23097 | ENSG00000155111 | 18591254 | validated |
| mirTarbase | hsa-miR-301a-3p | CDK19    | 23097 | ENSG00000155111 | 22100165 | validated |
| mirTarbase | hsa-miR-222-3p  | RAP1GAP2 | 23108 | ENSG00000132359 | 23622248 | validated |
| mirTarbase | hsa-miR-301a-3p | SPART    | 23111 | ENSG00000133104 | 23446348 | validated |
| mirTarbase | hsa-miR-21-5p   | TNRC6B   | 23112 | ENSG00000100354 | 18591254 | validated |

|            |                 |          |       |                 |          |           |
|------------|-----------------|----------|-------|-----------------|----------|-----------|
| mirTarbase | hsa-miR-18a-5p  | TNRC6B   | 23112 | ENSG00000100354 | 20371350 | validated |
| mirTarbase | hsa-miR-222-3p  | TNRC6B   | 23112 | ENSG00000100354 | 23622248 | validated |
| mirTarbase | hsa-miR-15b-5p  | TNRC6B   | 23112 | ENSG00000100354 | 22473208 | validated |
| mirTarbase | hsa-miR-106b-5p | TNRC6B   | 23112 | ENSG00000100354 | 23446348 | validated |
| mirTarbase | hsa-miR-301a-3p | TNRC6B   | 23112 | ENSG00000100354 | 23592263 | validated |
| mirTarbase | hsa-miR-181a-5p | TNRC6B   | 23112 | ENSG00000100354 | 22473208 | validated |
| mirTarbase | hsa-miR-181a-5p | TAB2     | 23118 | ENSG00000055208 | 20371350 | validated |
| mirTarbase | hsa-miR-15b-5p  | TAB2     | 23118 | ENSG00000055208 | 23622248 | validated |
| mirTarbase | hsa-miR-21-5p   | HIC2     | 23119 | ENSG00000169635 | 22473208 | validated |
| mirTarbase | hsa-miR-301a-3p | POGZ     | 23126 | ENSG00000143442 | 21572407 | validated |
| mirTarbase | hsa-miR-106b-5p | ATG2A    | 23130 | ENSG00000110046 | 22473208 | validated |
| mirTarbase | hsa-miR-192-5p  | ATG2A    | 23130 | ENSG00000110046 | 20371350 | validated |
| mirTarbase | hsa-miR-15b-5p  | GPATCH8  | 23131 | ENSG00000186566 | 22473208 | validated |
| mirTarbase | hsa-miR-326     | PHF8     | 23133 | ENSG00000172943 | 21572407 | validated |
| mirTarbase | hsa-miR-106b-5p | KDM6B    | 23135 | ENSG00000132510 | 20371350 | validated |
| mirTarbase | hsa-miR-505-3p  | GRAMD4   | 23151 | ENSG00000075240 | 22012620 | validated |
| mirTarbase | hsa-miR-181a-5p | CLCC1    | 23155 | ENSG00000121940 | 22473208 | validated |
| mirTarbase | hsa-miR-106b-5p | TBC1D9   | 23158 | ENSG00000109436 | 17242205 | validated |
| mirTarbase | hsa-miR-192-5p  | SNX13    | 23161 | ENSG00000071189 | 19074876 | validated |
| mirTarbase | hsa-miR-15b-5p  | GGA3     | 23163 | ENSG00000125447 | 22473208 | validated |
| mirTarbase | hsa-miR-21-5p   | GPD1L    | 23171 | ENSG00000152642 | 18591254 | validated |
| mirTarbase | hsa-miR-181a-5p | GPD1L    | 23171 | ENSG00000152642 | 28280258 | validated |
| mirTarbase | hsa-miR-181a-5p | METAP1   | 23173 | ENSG00000164024 | 17612493 | validated |
| mirTarbase | hsa-miR-15b-5p  | ZCCHC14  | 23174 | ENSG00000140948 | 23622248 | validated |
| mirTarbase | hsa-miR-192-5p  | PASK     | 23178 | ENSG00000115687 | 19074876 | validated |
| mirTarbase | hsa-miR-15b-5p  | MESD     | 23184 | ENSG00000117899 | 23622248 | validated |
| mirTarbase | hsa-miR-222-3p  | MESD     | 23184 | ENSG00000117899 | 23622248 | validated |
| mirTarbase | hsa-miR-15b-5p  | RCOR1    | 23186 | ENSG00000089902 | 22473208 | validated |
| mirTarbase | hsa-miR-181a-5p | RCOR1    | 23186 | ENSG00000089902 | 22473208 | validated |
| mirTarbase | hsa-miR-15b-5p  | KANK1    | 23189 | ENSG00000107104 | 21572407 | validated |
| mirTarbase | hsa-miR-222-3p  | GANAB    | 23193 | ENSG00000089597 | 23622248 | validated |
| mirTarbase | hsa-miR-181a-5p | GANAB    | 23193 | ENSG00000089597 | 23622248 | validated |
| mirTarbase | hsa-miR-15b-5p  | GANAB    | 23193 | ENSG00000089597 | 22473208 | validated |
| mirTarbase | hsa-miR-106b-5p | FBXL7    | 23194 | ENSG00000183580 | 22012620 | validated |
| mirTarbase | hsa-miR-222-3p  | MDN1     | 23195 | ENSG00000112159 | 23622248 | validated |
| mirTarbase | hsa-miR-106b-5p | FAF2     | 23197 | ENSG00000113194 | 22473208 | validated |
| mirTarbase | hsa-miR-21-5p   | ATP11B   | 23200 | ENSG00000058063 | 18591254 | validated |
| mirTarbase | hsa-miR-222-3p  | ATP11B   | 23200 | ENSG00000058063 | 23622248 | validated |
| mirTarbase | hsa-miR-222-3p  | ARL6IP1  | 23204 | ENSG00000170540 | 23592263 | validated |
| mirTarbase | hsa-miR-301a-3p | ARL6IP1  | 23204 | ENSG00000170540 | 27292025 | validated |
| mirTarbase | hsa-miR-212-3p  | RRS1     | 23212 | ENSG00000179041 | 21572407 | validated |
| mirTarbase | hsa-miR-222-3p  | XPO6     | 23214 | ENSG00000169180 | 23622248 | validated |
| mirTarbase | hsa-miR-181a-5p | PRRC2C   | 23215 | ENSG00000117523 | 22473208 | validated |
| mirTarbase | hsa-miR-15b-5p  | PRRC2C   | 23215 | ENSG00000117523 | 22473208 | validated |
| mirTarbase | hsa-miR-181a-5p | FBXO28   | 23219 | ENSG00000143756 | 20371350 | validated |
| mirTarbase | hsa-miR-301a-3p | FBXO28   | 23219 | ENSG00000143756 | 21572407 | validated |
| mirTarbase | hsa-miR-301a-3p | DTX4     | 23220 | ENSG00000110042 | 19536157 | validated |
| mirTarbase | hsa-miR-106b-5p | RHOBTB2  | 23221 | ENSG00000008853 | 23622248 | validated |
| mirTarbase | hsa-miR-21-5p   | SYNE2    | 23224 | ENSG00000054654 | 18591254 | validated |
| mirTarbase | hsa-miR-15b-5p  | NUP210   | 23225 | ENSG00000132182 | 23622248 | validated |
| mirTarbase | hsa-miR-181a-5p | PLCL2    | 23228 | ENSG00000154822 | 17612493 | validated |
| mirTarbase | hsa-miR-21-5p   | VPS13A   | 23230 | ENSG00000197969 | 18591254 | validated |
| mirTarbase | hsa-miR-15b-5p  | VPS13A   | 23230 | ENSG00000197969 | 23622248 | validated |
| mirTarbase | hsa-miR-15b-5p  | DNAJC9   | 23234 | ENSG00000213551 | 22473208 | validated |
| mirTarbase | hsa-miR-181a-5p | SIK2     | 23235 | ENSG00000170145 | 23622248 | validated |
| mirTarbase | hsa-miR-18a-5p  | PHLPP1   | 23239 | ENSG00000081913 | 22116552 | validated |
| mirTarbase | hsa-miR-106b-5p | TMEM131L | 23240 | ENSG00000121210 | 22012620 | validated |
| mirTarbase | hsa-miR-222-3p  | PACS2    | 23241 | ENSG00000179364 | 23622248 | validated |
| mirTarbase | hsa-miR-21-5p   | ANKRD28  | 23243 | ENSG00000206560 | 18591254 | validated |
| mirTarbase | hsa-miR-301a-3p | RPRD2    | 23248 | ENSG00000163125 | 22012620 | validated |
| mirTarbase | hsa-miR-15b-5p  | RPRD2    | 23248 | ENSG00000163125 | 24398324 | validated |
| mirTarbase | hsa-miR-21-5p   | RPRD2    | 23248 | ENSG00000163125 | 23446348 | validated |
| mirTarbase | hsa-miR-106b-5p | RPRD2    | 23248 | ENSG00000163125 | 20371350 | validated |
| mirTarbase | hsa-miR-296-5p  | RPRD2    | 23248 | ENSG00000163125 | 27418678 | validated |
| mirTarbase | hsa-miR-192-5p  | OTUD3    | 23252 | ENSG00000169914 | 19074876 | validated |
| mirTarbase | hsa-miR-301a-3p | OTUD3    | 23252 | ENSG00000169914 | 21572407 | validated |
| mirTarbase | hsa-miR-212-3p  | OTUD3    | 23252 | ENSG00000169914 | 27292025 | validated |
| mirTarbase | hsa-miR-106b-5p | ANKRD12  | 23253 | ENSG00000101745 | 22473208 | validated |
| mirTarbase | hsa-miR-144-3p  | ANKRD12  | 23253 | ENSG00000101745 | 22100165 | validated |
| mirTarbase | hsa-miR-181a-5p | MTCL1    | 23255 | ENSG00000168502 | 23622248 | validated |
| mirTarbase | hsa-miR-21-5p   | DDHD2    | 23259 | ENSG00000085788 | 18591254 | validated |

|            |                 |          |       |                 |          |           |
|------------|-----------------|----------|-------|-----------------|----------|-----------|
| mirTarbase | hsa-miR-106b-5p | CAMTA1   | 23261 | ENSG00000171735 | 22473208 | validated |
| mirTarbase | hsa-miR-15b-5p  | PPIP5K2  | 23262 | ENSG00000145725 | 19536157 | validated |
| mirTarbase | hsa-miR-21-5p   | MGA      | 23269 | ENSG00000174197 | 17072344 | validated |
| mirTarbase | hsa-miR-301a-3p | CAMSAP2  | 23271 | ENSG00000118200 | 24398324 | validated |
| mirTarbase | hsa-miR-15b-5p  | CLUH     | 23277 | ENSG00000132361 | 26701625 | validated |
| mirTarbase | hsa-miR-505-3p  | CLUH     | 23277 | ENSG00000132361 | 26701625 | validated |
| mirTarbase | hsa-miR-15b-5p  | NUP160   | 23279 | ENSG00000030066 | 23622248 | validated |
| mirTarbase | hsa-miR-192-5p  | CSTF2T   | 23283 | ENSG00000177613 | 21572407 | validated |
| mirTarbase | hsa-miR-106b-5p | WWC1     | 23286 | ENSG00000113645 | 23313552 | validated |
| mirTarbase | hsa-miR-505-3p  | BICD2    | 23299 | ENSG00000185963 | 23592263 | validated |
| mirTarbase | hsa-miR-144-3p  | BICD2    | 23299 | ENSG00000185963 | 21572407 | validated |
| mirTarbase | hsa-miR-106b-5p | BICD2    | 23299 | ENSG00000185963 | 20371350 | validated |
| mirTarbase | hsa-miR-21-5p   | ATMIN    | 23300 | ENSG00000166454 | 20371350 | validated |
| mirTarbase | hsa-miR-301a-3p | ATMIN    | 23300 | ENSG00000166454 | 22012620 | validated |
| mirTarbase | hsa-miR-192-5p  | NEMP1    | 23306 | ENSG00000166881 | 19074876 | validated |
| mirTarbase | hsa-miR-192-5p  | FKBP15   | 23307 | ENSG00000119321 | 19074876 | validated |
| mirTarbase | hsa-miR-21-5p   | ICOSLG   | 23308 | ENSG00000160223 | 25327529 | validated |
| mirTarbase | hsa-miR-192-5p  | SATB2    | 23314 | ENSG00000119042 | 19074876 | validated |
| mirTarbase | hsa-miR-301a-3p | SATB2    | 23314 | ENSG00000119042 | 21572407 | validated |
| mirTarbase | hsa-miR-106b-5p | DNAJC13  | 23317 | ENSG00000138246 | 23622248 | validated |
| mirTarbase | hsa-miR-181a-5p | TRIM2    | 23321 | ENSG00000109654 | 20371350 | validated |
| mirTarbase | hsa-miR-21-5p   | TRIM2    | 23321 | ENSG00000109654 | 18591254 | validated |
| mirTarbase | hsa-miR-192-5p  | RPGRIP1L | 23322 | ENSG00000103494 | 19074876 | validated |
| mirTarbase | hsa-miR-106b-5p | MAN2B2   | 23324 | ENSG00000013288 | 23313552 | validated |
| mirTarbase | hsa-miR-21-5p   | SASH1    | 23328 | ENSG00000111961 | 18591254 | validated |
| mirTarbase | hsa-miR-181a-5p | SASH1    | 23328 | ENSG00000111961 | 22815788 | validated |
| mirTarbase | hsa-miR-582-5p  | DPY19L1  | 23333 | ENSG00000173852 | 23592263 | validated |
| mirTarbase | hsa-miR-296-5p  | DPY19L1  | 23333 | ENSG00000173852 | 22291592 | validated |
| mirTarbase | hsa-miR-21-5p   | WDR7     | 23335 | ENSG00000091157 | 18591254 | validated |
| mirTarbase | hsa-miR-18a-5p  | SYNM     | 23336 | ENSG00000182253 | 21572407 | validated |
| mirTarbase | hsa-miR-192-5p  | SYNM     | 23336 | ENSG00000182253 | 21572407 | validated |
| mirTarbase | hsa-miR-21-5p   | DNAJC16  | 23341 | ENSG00000116138 | 22473208 | validated |
| mirTarbase | hsa-miR-181a-5p | SMCHD1   | 23347 | ENSG00000101596 | 17612493 | validated |
| mirTarbase | hsa-miR-18a-5p  | SMCHD1   | 23347 | ENSG00000101596 | 23622248 | validated |
| mirTarbase | hsa-miR-106b-5p | U2SURP   | 23350 | ENSG00000163714 | 22473208 | validated |
| mirTarbase | hsa-miR-15b-5p  | U2SURP   | 23350 | ENSG00000163714 | 22473208 | validated |
| mirTarbase | hsa-miR-15b-5p  | SUN1     | 23353 | ENSG00000164828 | 22473208 | validated |
| mirTarbase | hsa-miR-326     | PSD3     | 23362 | ENSG00000156011 | 23622248 | validated |
| mirTarbase | hsa-miR-21-5p   | ARHGEF12 | 23365 | ENSG00000196914 | 18591254 | validated |
| mirTarbase | hsa-miR-15b-5p  | KIAA0895 | 23366 | ENSG00000164542 | 22291592 | validated |
| mirTarbase | hsa-miR-505-3p  | PPP1R13B | 23368 | ENSG00000088808 | 23622248 | validated |
| mirTarbase | hsa-miR-106b-5p | ARHGEF18 | 23370 | ENSG00000104880 | 22473208 | validated |
| mirTarbase | hsa-miR-212-3p  | CRTC1    | 23373 | ENSG00000105662 | 23446348 | validated |
| mirTarbase | hsa-miR-21-5p   | NCSTN    | 23385 | ENSG00000162736 | 20371350 | validated |
| mirTarbase | hsa-miR-582-3p  | MED13L   | 23389 | ENSG00000123066 | 23824327 | validated |
| mirTarbase | hsa-miR-21-5p   | ADNP     | 23394 | ENSG00000101126 | 18591254 | validated |
| mirTarbase | hsa-miR-192-5p  | NCAPH    | 23397 | ENSG00000121152 | 19074876 | validated |
| mirTarbase | hsa-miR-222-3p  | DICER1   | 23405 | ENSG00000100697 | 21761362 | validated |
| mirTarbase | hsa-miR-18a-5p  | DICER1   | 23405 | ENSG00000100697 | 23097559 | validated |
| mirTarbase | hsa-miR-192-5p  | DICER1   | 23405 | ENSG00000100697 | 19074876 | validated |
| mirTarbase | hsa-miR-21-5p   | DICER1   | 23405 | ENSG00000100697 | 22473208 | validated |
| mirTarbase | hsa-miR-582-5p  | DICER1   | 23405 | ENSG00000100697 | 23592263 | validated |
| mirTarbase | hsa-miR-301a-3p | DICER1   | 23405 | ENSG00000100697 | 23592263 | validated |
| mirTarbase | hsa-miR-15b-5p  | DICER1   | 23405 | ENSG00000100697 | 22473208 | validated |
| mirTarbase | hsa-miR-15b-5p  | SIRT4    | 23409 | ENSG00000089163 | 22473208 | validated |
| mirTarbase | hsa-miR-181a-5p | SIRT1    | 23411 | ENSG00000096717 | 22476949 | validated |
| mirTarbase | hsa-miR-192-5p  | SIRT1    | 23411 | ENSG00000096717 | 19074876 | validated |
| mirTarbase | hsa-miR-18a-5p  | CRB1     | 23418 | ENSG00000134376 | 23592263 | validated |
| mirTarbase | hsa-miR-301a-3p | GPR161   | 23432 | ENSG00000143147 | 27292025 | validated |
| mirTarbase | hsa-miR-21-5p   | RHOQ     | 23433 | ENSG00000119729 | 18591254 | validated |
| mirTarbase | hsa-miR-192-5p  | TARDBP   | 23435 | ENSG00000120948 | 19074876 | validated |
| mirTarbase | hsa-miR-15b-5p  | TARDBP   | 23435 | ENSG00000120948 | 23622248 | validated |
| mirTarbase | hsa-miR-15b-5p  | SF3B3    | 23450 | ENSG00000189091 | 23622248 | validated |
| mirTarbase | hsa-miR-222-3p  | SF3B3    | 23450 | ENSG00000189091 | 23622248 | validated |
| mirTarbase | hsa-miR-326     | SF3B3    | 23450 | ENSG00000189091 | 23592263 | validated |
| mirTarbase | hsa-miR-106b-5p | SF3B3    | 23450 | ENSG00000189091 | 23313552 | validated |
| mirTarbase | hsa-miR-192-5p  | ABCB10   | 23456 | ENSG00000135776 | 19074876 | validated |
| mirTarbase | hsa-miR-106b-5p | ICMT     | 23463 | ENSG00000116237 | 23592263 | validated |
| mirTarbase | hsa-miR-15b-5p  | CBX6     | 23466 | ENSG00000183741 | 23446348 | validated |
| mirTarbase | hsa-miR-192-5p  | NPTXR    | 23467 | ENSG00000221890 | 19074876 | validated |
| mirTarbase | hsa-miR-106b-5p | CBX5     | 23468 | ENSG00000094916 | 23824327 | validated |

|            |                 |          |       |                  |          |           |
|------------|-----------------|----------|-------|------------------|----------|-----------|
| mirTarbase | hsa-miR-582-5p  | PHF3     | 23469 | ENSG00000118482  | 20371350 | validated |
| mirTarbase | hsa-miR-144-3p  | PHF3     | 23469 | ENSG00000118482  | 20371350 | validated |
| mirTarbase | hsa-miR-15b-5p  | TRAM1    | 23471 | ENSG00000067167  | 22473208 | validated |
| mirTarbase | hsa-miR-21-5p   | ISCU     | 23479 | ENSG00000136003  | 20480266 | validated |
| mirTarbase | hsa-miR-18a-5p  | ISCU     | 23479 | ENSG00000136003  | 26701625 | validated |
| mirTarbase | hsa-miR-192-5p  | LEPROTL1 | 23484 | ENSG00000104660  | 19074876 | validated |
| mirTarbase | hsa-miR-181a-5p | HEY2     | 23493 | ENSG00000135547  | 17612493 | validated |
| mirTarbase | hsa-miR-192-5p  | MACF1    | 23499 | ENSG00000127603  | 19074876 | validated |
| mirTarbase | hsa-miR-222-3p  | MACF1    | 23499 | ENSG00000127603  | 23622248 | validated |
| mirTarbase | hsa-miR-18a-5p  | DAAM2    | 23500 | ENSG00000146122  | 20371350 | validated |
| mirTarbase | hsa-miR-106b-5p | ZFYVE26  | 23503 | ENSG00000072121  | 23592263 | validated |
| mirTarbase | hsa-miR-301a-3p | ZFYVE26  | 23503 | ENSG00000072121  | 23592263 | validated |
| mirTarbase | hsa-miR-192-5p  | BICRAL   | 23506 | ENSG00000112624  | 19074876 | validated |
| mirTarbase | hsa-miR-106b-5p | TTC9     | 23508 | ENSG00000133985  | 23446348 | validated |
| mirTarbase | hsa-miR-106b-5p | POFUT1   | 23509 | ENSG00000101346  | 22473208 | validated |
| mirTarbase | hsa-miR-326     | POFUT1   | 23509 | ENSG00000101346  | 22100165 | validated |
| mirTarbase | hsa-miR-181a-5p | KCTD2    | 23510 | ENSG00000180901  | 23622248 | validated |
| mirTarbase | hsa-miR-21-5p   | SUZ12    | 23512 | ENSG00000178691  | 18591254 | validated |
| mirTarbase | hsa-miR-296-5p  | SCRIB    | 23513 | ENSG00000274287  | 21643016 | validated |
| mirTarbase | hsa-miR-21-5p   | MORC3    | 23515 | ENSG00000159256  | 20371350 | validated |
| mirTarbase | hsa-miR-144-3p  | MORC3    | 23515 | ENSG00000159256  | 21572407 | validated |
| mirTarbase | hsa-miR-15b-5p  | SLC39A14 | 23516 | ENSG00000104635  | 23622248 | validated |
| mirTarbase | hsa-miR-181a-5p | RPL13A   | 23521 | ENSG00000142541  | 26701625 | validated |
| mirTarbase | hsa-miR-222-3p  | SRRM2    | 23524 | ENSG00000167978  | 23622248 | validated |
| mirTarbase | hsa-miR-106b-5p | ACAP2    | 23527 | ENSG00000114331  | 22473208 | validated |
| mirTarbase | hsa-miR-505-3p  | ACAP2    | 23527 | ENSG00000114331  | 23824327 | validated |
| mirTarbase | hsa-miR-326     | ACAP2    | 23527 | ENSG00000114331  | 23824327 | validated |
| mirTarbase | hsa-miR-106b-5p | NNT      | 23530 | ENSG00000112992  | 23622248 | validated |
| mirTarbase | hsa-miR-15b-5p  | NNT      | 23530 | ENSG00000112992  | 23446348 | validated |
| mirTarbase | hsa-miR-15b-5p  | TNPO3    | 23534 | ENSG00000064419  | 23622248 | validated |
| mirTarbase | hsa-miR-21-5p   | TTC33    | 23548 | ENSG00000113638  | 19253296 | validated |
| mirTarbase | hsa-miR-212-3p  | TSPAN12  | 23554 | ENSG00000106025  | 21572407 | validated |
| mirTarbase | hsa-miR-21-5p   | PIGN     | 23556 | ENSG00000197563  | 18591254 | validated |
| mirTarbase | hsa-miR-301a-3p | SNAPIN   | 23557 | ENSG00000143553  | 23592263 | validated |
| mirTarbase | hsa-miR-192-5p  | ZNF346   | 23567 | ENSG00000113761  | 19074876 | validated |
| mirTarbase | hsa-miR-192-5p  | ARL2BP   | 23568 | ENSG00000102931  | 19074876 | validated |
| mirTarbase | hsa-miR-21-5p   | DDAH1    | 23576 | ENSG00000153904  | 18591254 | validated |
| mirTarbase | hsa-miR-18a-5p  | DDAH1    | 23576 | ENSG00000153904  | 23622248 | validated |
| mirTarbase | hsa-miR-296-5p  | CDC42EP4 | 23580 | ENSG00000179604  | 19536157 | validated |
| mirTarbase | hsa-miR-582-5p  | CDC42EP4 | 23580 | ENSG00000179604  | 27292025 | validated |
| mirTarbase | hsa-miR-106b-5p | PDSS1    | 23590 | ENSG00000148459  | 23622248 | validated |
| mirTarbase | hsa-miR-106b-5p | ACOT9    | 23597 | ENSG00000123130  | 23313552 | validated |
| mirTarbase | hsa-miR-326     | PATZ1    | 23598 | ENSG00000100105  | 22012620 | validated |
| mirTarbase | hsa-miR-15b-5p  | CD2AP    | 23607 | ENSG00000198087  | 21572407 | validated |
| mirTarbase | hsa-miR-106b-5p | MKRN1    | 23608 | ENSG00000133606  | 22473208 | validated |
| mirTarbase | hsa-miR-18a-5p  | ZMYND8   | 23613 | ENSG00000101040  | 23622248 | validated |
| mirTarbase | hsa-miR-505-3p  | BACE1    | 23621 | ENSG00000186318  | 19536157 | validated |
| mirTarbase | hsa-miR-222-3p  | KPNA6    | 23633 | ENSG00000025800  | 23622248 | validated |
| mirTarbase | hsa-miR-106b-5p | KPNA6    | 23633 | ENSG00000025800  | 27292025 | validated |
| mirTarbase | hsa-miR-326     | SSBP2    | 23635 | ENSG00000145687  | 23824327 | validated |
| mirTarbase | hsa-miR-192-5p  | RABGAP1  | 23637 | ENSG000000011454 | 16822819 | validated |
| mirTarbase | hsa-miR-21-5p   | RABGAP1  | 23637 | ENSG000000011454 | 18591254 | validated |
| mirTarbase | hsa-miR-15b-5p  | EDC4     | 23644 | ENSG00000038358  | 23622248 | validated |
| mirTarbase | hsa-miR-192-5p  | POLA2    | 23649 | ENSG00000014138  | 19074876 | validated |
| mirTarbase | hsa-miR-15b-5p  | TRIM29   | 23650 | ENSG00000137699  | 26872369 | validated |
| mirTarbase | hsa-miR-222-3p  | PLXNB2   | 23654 | ENSG00000196576  | 23622248 | validated |
| mirTarbase | hsa-miR-181a-5p | SLC7A11  | 23657 | ENSG00000151012  | 17612493 | validated |
| mirTarbase | hsa-miR-192-5p  | SLC7A11  | 23657 | ENSG00000151012  | 19074876 | validated |
| mirTarbase | hsa-miR-106b-5p | SLC7A11  | 23657 | ENSG00000151012  | 23313552 | validated |
| mirTarbase | hsa-miR-301a-3p | UBBP4    | 23666 |                  | 23446348 | validated |
| mirTarbase | hsa-miR-192-5p  | CEMIP2   | 23670 | ENSG00000135048  | 19074876 | validated |
| mirTarbase | hsa-miR-21-5p   | CEMIP2   | 23670 | ENSG00000135048  | 18591254 | validated |
| mirTarbase | hsa-miR-301a-3p | CEMIP2   | 23670 | ENSG00000135048  | 23313552 | validated |
| mirTarbase | hsa-miR-222-3p  | CEMIP2   | 23670 | ENSG00000135048  | 23313552 | validated |
| mirTarbase | hsa-miR-18a-5p  | CEMIP2   | 23670 | ENSG00000135048  | 23313552 | validated |
| mirTarbase | hsa-miR-106b-5p | STX12    | 23673 | ENSG00000117758  | 23622248 | validated |
| mirTarbase | hsa-miR-18a-5p  | STX12    | 23673 | ENSG00000117758  | 23622248 | validated |
| mirTarbase | hsa-miR-192-5p  | SH3BP4   | 23677 | ENSG00000130147  | 19074876 | validated |
| mirTarbase | hsa-miR-15b-5p  | SH3BP4   | 23677 | ENSG00000130147  | 23592263 | validated |
| mirTarbase | hsa-miR-212-3p  | SGK3     | 23678 | ENSG00000104205  | 25720694 | validated |
| mirTarbase | hsa-miR-192-5p  | PRKD3    | 23683 | ENSG00000115825  | 19074876 | validated |

|            |                 |           |       |                 |          |           |
|------------|-----------------|-----------|-------|-----------------|----------|-----------|
| mirTarbase | hsa-miR-192-5p  | CADM1     | 23705 | ENSG00000182985 | 16822819 | validated |
| mirTarbase | hsa-miR-144-3p  | CADM1     | 23705 | ENSG00000182985 | 20371350 | validated |
| mirTarbase | hsa-miR-21-5p   | CADM1     | 23705 | ENSG00000182985 | 27055844 | validated |
| mirTarbase | hsa-miR-15b-5p  | GABARAPL1 | 23710 | ENSG00000139112 | 23446348 | validated |
| mirTarbase | hsa-miR-106b-5p | TMEM245   | 23731 | ENSG00000106771 | 17242205 | validated |
| mirTarbase | hsa-miR-21-5p   | TMEM245   | 23731 | ENSG00000106771 | 20371350 | validated |
| mirTarbase | hsa-miR-222-3p  | TMEM245   | 23731 | ENSG00000106771 | 23622248 | validated |
| mirTarbase | hsa-miR-15b-5p  | TMEM245   | 23731 | ENSG00000106771 | 23446348 | validated |
| mirTarbase | hsa-miR-106b-5p | BHMT2     | 23743 | ENSG00000132840 | 23313552 | validated |
| mirTarbase | hsa-miR-15b-5p  | PPIL2     | 23759 | ENSG00000100023 | 23622248 | validated |
| mirTarbase | hsa-miR-181a-5p | PITPNB    | 23760 | ENSG00000180957 | 20371350 | validated |
| mirTarbase | hsa-miR-192-5p  | PITPNB    | 23760 | ENSG00000180957 | 19074876 | validated |
| mirTarbase | hsa-miR-15b-5p  | PISD      | 23761 | ENSG00000241878 | 23592263 | validated |
| mirTarbase | hsa-miR-505-3p  | PISD      | 23761 | ENSG00000241878 | 24398324 | validated |
| mirTarbase | hsa-miR-192-5p  | BCL2L13   | 23786 | ENSG00000099968 | 19074876 | validated |
| mirTarbase | hsa-miR-222-3p  | KIF4A     | 24137 | ENSG00000090889 | 23622248 | validated |
| mirTarbase | hsa-miR-106b-5p | IFIT5     | 24138 | ENSG00000152778 | 17242205 | validated |
| mirTarbase | hsa-miR-192-5p  | PANX1     | 24145 | ENSG00000110218 | 16822819 | validated |
| mirTarbase | hsa-miR-106b-5p | FJX1      | 24147 | ENSG00000179431 | 21572407 | validated |
| mirTarbase | hsa-miR-106b-5p | HYPK      | 25764 | ENSG00000242028 | 23446348 | validated |
| mirTarbase | hsa-miR-301a-3p | CBY1      | 25776 | ENSG00000100211 | 21572407 | validated |
| mirTarbase | hsa-miR-222-3p  | SUN2      | 25777 | ENSG00000100242 | 23622248 | validated |
| mirTarbase | hsa-miR-301a-3p | SUN2      | 25777 | ENSG00000100242 | 21572407 | validated |
| mirTarbase | hsa-miR-192-5p  | DSTYK     | 25778 | ENSG00000133059 | 19074876 | validated |
| mirTarbase | hsa-miR-301a-3p | DSTYK     | 25778 | ENSG00000133059 | 22012620 | validated |
| mirTarbase | hsa-miR-106b-5p | DSTYK     | 25778 | ENSG00000133059 | 27292025 | validated |
| mirTarbase | hsa-miR-21-5p   | RASGRP3   | 25780 | ENSG00000152689 | 18591254 | validated |
| mirTarbase | hsa-miR-192-5p  | DGCR11    | 25786 |                 | 19074876 | validated |
| mirTarbase | hsa-miR-192-5p  | FSBP      | 25788 | ENSG00000265817 | 19074876 | validated |
| mirTarbase | hsa-miR-192-5p  | RAD54B    | 25788 | ENSG00000197275 | 19074876 | validated |
| mirTarbase | hsa-miR-326     | CIZ1      | 25792 | ENSG00000148337 | 23622248 | validated |
| mirTarbase | hsa-miR-18a-5p  | CIZ1      | 25792 | ENSG00000148337 | 23622248 | validated |
| mirTarbase | hsa-miR-144-3p  | SLC39A6   | 25800 | ENSG00000141424 | 21572407 | validated |
| mirTarbase | hsa-miR-505-3p  | LSM4      | 25804 | ENSG00000130520 | 27292025 | validated |
| mirTarbase | hsa-miR-106b-5p | BAMBI     | 25805 | ENSG00000095739 | 23622248 | validated |
| mirTarbase | hsa-miR-15b-5p  | BAMBI     | 25805 | ENSG00000095739 | 23622248 | validated |
| mirTarbase | hsa-miR-21-5p   | ATXN10    | 25814 | ENSG00000130638 | 22473208 | validated |
| mirTarbase | hsa-miR-15b-5p  | ARIH1     | 25820 | ENSG00000166233 | 22473208 | validated |
| mirTarbase | hsa-miR-212-3p  | MTO1      | 25821 | ENSG00000135297 | 27292025 | validated |
| mirTarbase | hsa-miR-192-5p  | DNAJB5    | 25822 | ENSG00000137094 | 19074876 | validated |
| mirTarbase | hsa-miR-21-5p   | FBXL2     | 25827 | ENSG00000153558 | 18591254 | validated |
| mirTarbase | hsa-miR-21-5p   | HECTD1    | 25831 | ENSG00000092148 | 18591254 | validated |
| mirTarbase | hsa-miR-21-5p   | NIPBL     | 25836 | ENSG00000164190 | 18591254 | validated |
| mirTarbase | hsa-miR-106b-5p | ABTB2     | 25841 | ENSG00000166016 | 23622248 | validated |
| mirTarbase | hsa-miR-212-3p  | ASF1A     | 25842 | ENSG00000111875 | 21572407 | validated |
| mirTarbase | hsa-miR-18a-5p  | MOB4      | 25843 | ENSG00000115540 | 20371350 | validated |
| mirTarbase | hsa-miR-15b-5p  | MOB4      | 25843 | ENSG00000115540 | 24398324 | validated |
| mirTarbase | hsa-miR-144-3p  | MOB4      | 25843 | ENSG00000115540 | 20371350 | validated |
| mirTarbase | hsa-miR-15b-5p  | ANAPC13   | 25847 | ENSG00000129055 | 21572407 | validated |
| mirTarbase | hsa-miR-192-5p  | PARM1     | 25849 | ENSG00000169116 | 19074876 | validated |
| mirTarbase | hsa-miR-296-5p  | SUMF2     | 25870 | ENSG00000129103 | 23592263 | validated |
| mirTarbase | hsa-miR-15b-5p  | RPL36     | 25873 | ENSG00000130255 | 22473208 | validated |
| mirTarbase | hsa-miR-192-5p  | ANAPC15   | 25906 | ENSG00000110200 | 19074876 | validated |
| mirTarbase | hsa-miR-106b-5p | C1orf43   | 25912 | ENSG00000143612 | 23622248 | validated |
| mirTarbase | hsa-miR-15b-5p  | C1orf43   | 25912 | ENSG00000143612 | 23622248 | validated |
| mirTarbase | hsa-miR-106b-5p | ATL3      | 25923 | ENSG00000184743 | 22473208 | validated |
| mirTarbase | hsa-miR-301a-3p | CLIC4     | 25932 | ENSG00000169504 | 23446348 | validated |
| mirTarbase | hsa-miR-144-3p  | CLIC4     | 25932 | ENSG00000169504 | 23446348 | validated |
| mirTarbase | hsa-miR-106b-5p | CLIC4     | 25932 | ENSG00000169504 | 21572407 | validated |
| mirTarbase | hsa-miR-18a-5p  | WWTR1     | 25937 | ENSG00000018408 | 23622248 | validated |
| mirTarbase | hsa-miR-192-5p  | SAMHD1    | 25939 | ENSG00000101347 | 19074876 | validated |
| mirTarbase | hsa-miR-181a-5p | SAMHD1    | 25939 | ENSG00000101347 | 25890101 | validated |
| mirTarbase | hsa-miR-192-5p  | TPGS2     | 25941 | ENSG00000134779 | 19074876 | validated |
| mirTarbase | hsa-miR-21-5p   | C20orf194 | 25943 | ENSG00000088854 | 18591254 | validated |
| mirTarbase | hsa-miR-106b-5p | ZNF385A   | 25946 | ENSG00000161642 | 22012620 | validated |
| mirTarbase | hsa-miR-192-5p  | PNKD      | 25953 | ENSG00000127838 | 22100165 | validated |
| mirTarbase | hsa-miR-181a-5p | PNKD      | 25953 | ENSG00000127838 | 19536157 | validated |
| mirTarbase | hsa-miR-18a-5p  | PNISR     | 25957 | ENSG00000132424 | 23446348 | validated |
| mirTarbase | hsa-miR-15b-5p  | PNISR     | 25957 | ENSG00000132424 | 22473208 | validated |
| mirTarbase | hsa-miR-106b-5p | KANK2     | 25959 | ENSG00000197256 | 23622248 | validated |
| mirTarbase | hsa-miR-222-3p  | TIPARP    | 25976 | ENSG00000163659 | 22815788 | validated |

|            |                 |          |       |                 |          |           |
|------------|-----------------|----------|-------|-----------------|----------|-----------|
| mirtarbase | hsa-miR-181a-5p | CHMP2B   | 25978 | ENSG00000083937 | 21572407 | validated |
| mirtarbase | hsa-miR-106b-5p | TSKU     | 25987 | ENSG00000182704 | 20371350 | validated |
| mirtarbase | hsa-miR-15b-5p  | HIGD1A   | 25994 | ENSG00000181061 | 21572407 | validated |
| mirtarbase | hsa-miR-21-5p   | MOXD1    | 26002 | ENSG00000079931 | 18591254 | validated |
| mirtarbase | hsa-miR-21-5p   | SPATS2L  | 26010 | ENSG00000196141 | 19253296 | validated |
| mirtarbase | hsa-miR-222-3p  | NSMF     | 26012 | ENSG00000165802 | 23622248 | validated |
| mirtarbase | hsa-miR-192-5p  | LRIG1    | 26018 | ENSG00000144749 | 19074876 | validated |
| mirtarbase | hsa-miR-222-3p  | LRP10    | 26020 | ENSG00000197324 | 23622248 | validated |
| mirtarbase | hsa-miR-505-3p  | PTCD1    | 26024 | ENSG00000106246 | 23622248 | validated |
| mirtarbase | hsa-miR-505-3p  | PLEKHG3  | 26030 | ENSG00000126822 | 27292025 | validated |
| mirtarbase | hsa-miR-21-5p   | OSBPL3   | 26031 | ENSG00000070882 | 18591254 | validated |
| mirtarbase | hsa-miR-15b-5p  | OSBPL3   | 26031 | ENSG00000070882 | 20371350 | validated |
| mirtarbase | hsa-miR-181a-5p | OSBPL3   | 26031 | ENSG00000070882 | 22473208 | validated |
| mirtarbase | hsa-miR-192-5p  | ATRNL1   | 26033 | ENSG00000107518 | 19074876 | validated |
| mirtarbase | hsa-miR-181a-5p | SIPA1L1  | 26037 | ENSG00000197555 | 22473208 | validated |
| mirtarbase | hsa-miR-21-5p   | AUTS2    | 26053 | ENSG00000158321 | 19253296 | validated |
| mirtarbase | hsa-miR-222-3p  | AUTS2    | 26053 | ENSG00000158321 | 23622248 | validated |
| mirtarbase | hsa-miR-582-5p  | ANKRD17  | 26057 | ENSG00000132466 | 22100165 | validated |
| mirtarbase | hsa-miR-505-3p  | GIGYF2   | 26058 | ENSG00000204120 | 23622248 | validated |
| mirtarbase | hsa-miR-192-5p  | APPL1    | 26060 | ENSG00000157500 | 19074876 | validated |
| mirtarbase | hsa-miR-21-5p   | APPL1    | 26060 | ENSG00000157500 | 18591254 | validated |
| mirtarbase | hsa-miR-21-5p   | RAI14    | 26064 | ENSG00000039560 | 18591254 | validated |
| mirtarbase | hsa-miR-15b-5p  | LSM14A   | 26065 | ENSG00000257103 | 23622248 | validated |
| mirtarbase | hsa-miR-144-3p  | LSM14A   | 26065 | ENSG00000257103 | 23446348 | validated |
| mirtarbase | hsa-miR-18a-5p  | RTL8A    | 26071 | ENSG00000203950 | 20371350 | validated |
| mirtarbase | hsa-miR-326     | RTL8A    | 26071 | ENSG00000203950 | 23446348 | validated |
| mirtarbase | hsa-miR-192-5p  | ARHGEF26 | 26084 | ENSG00000277101 | 19074876 | validated |
| mirtarbase | hsa-miR-301a-3p | ARHGEF26 | 26084 | ENSG00000277101 | 21572407 | validated |
| mirtarbase | hsa-miR-222-3p  | HERC4    | 26091 | ENSG00000148634 | 23622248 | validated |
| mirtarbase | hsa-miR-192-5p  | TOR1AIP1 | 26092 | ENSG00000143337 | 19074876 | validated |
| mirtarbase | hsa-miR-181a-5p | DCAF4    | 26094 | ENSG00000119599 | 22100165 | validated |
| mirtarbase | hsa-miR-18a-5p  | DCAF4    | 26094 | ENSG00000119599 | 22100165 | validated |
| mirtarbase | hsa-miR-192-5p  | EDRF1    | 26098 | ENSG00000107938 | 19074876 | validated |
| mirtarbase | hsa-miR-21-5p   | EDRF1    | 26098 | ENSG00000107938 | 22473208 | validated |
| mirtarbase | hsa-miR-15b-5p  | SZRD1    | 26099 | ENSG00000055070 | 21572407 | validated |
| mirtarbase | hsa-miR-15b-5p  | WIPI2    | 26100 | ENSG00000157954 | 22473208 | validated |
| mirtarbase | hsa-miR-21-5p   | WSB1     | 26118 | ENSG00000109046 | 22473208 | validated |
| mirtarbase | hsa-miR-106b-5p | WSB1     | 26118 | ENSG00000109046 | 23446348 | validated |
| mirtarbase | hsa-miR-301a-3p | KIFBP    | 26128 | ENSG00000198954 | 23622248 | validated |
| mirtarbase | hsa-miR-21-5p   | GAPVD1   | 26130 | ENSG00000165219 | 18591254 | validated |
| mirtarbase | hsa-miR-106b-5p | TRPC4AP  | 26133 | ENSG00000100991 | 23622248 | validated |
| mirtarbase | hsa-miR-326     | TRPC4AP  | 26133 | ENSG00000100991 | 23824327 | validated |
| mirtarbase | hsa-miR-505-3p  | SERBP1   | 26135 | ENSG00000142864 | 23622248 | validated |
| mirtarbase | hsa-miR-15b-5p  | SERBP1   | 26135 | ENSG00000142864 | 23622248 | validated |
| mirtarbase | hsa-miR-18a-5p  | SERBP1   | 26135 | ENSG00000142864 | 23622248 | validated |
| mirtarbase | hsa-miR-21-5p   | ZBTB20   | 26137 | ENSG00000181722 | 18591254 | validated |
| mirtarbase | hsa-miR-144-3p  | ZBTB20   | 26137 | ENSG00000181722 | 22291592 | validated |
| mirtarbase | hsa-miR-192-5p  | PHF19    | 26147 | ENSG00000119403 | 19074876 | validated |
| mirtarbase | hsa-miR-15b-5p  | PHF19    | 26147 | ENSG00000119403 | 20371350 | validated |
| mirtarbase | hsa-miR-192-5p  | FBXW2    | 26190 | ENSG00000119402 | 19074876 | validated |
| mirtarbase | hsa-miR-106b-5p | FBXW2    | 26190 | ENSG00000119402 | 23622248 | validated |
| mirtarbase | hsa-miR-222-3p  | FBXW2    | 26190 | ENSG00000119402 | 23622248 | validated |
| mirtarbase | hsa-miR-181a-5p | PTPN22   | 26191 | ENSG00000134242 | 17382377 | validated |
| mirtarbase | hsa-miR-192-5p  | PITPNC1  | 26207 | ENSG00000154217 | 19074876 | validated |
| mirtarbase | hsa-miR-18a-5p  | FBXL3    | 26224 | ENSG00000005812 | 21572407 | validated |
| mirtarbase | hsa-miR-106b-5p | FBXL5    | 26234 | ENSG00000118564 | 22473208 | validated |
| mirtarbase | hsa-miR-18a-5p  | KLHL3    | 26249 | ENSG00000146021 | 27418678 | validated |
| mirtarbase | hsa-miR-222-3p  | CABYR    | 26256 | ENSG00000154040 | 23622248 | validated |
| mirtarbase | hsa-miR-192-5p  | BLOC1S6  | 26258 | ENSG00000104164 | 23824327 | validated |
| mirtarbase | hsa-miR-192-5p  | FBXO25   | 26260 | ENSG00000147364 | 19074876 | validated |
| mirtarbase | hsa-miR-106b-5p | FBXO22   | 26263 | ENSG00000167196 | 23622248 | validated |
| mirtarbase | hsa-miR-106b-5p | FBXO10   | 26267 | ENSG00000147912 | 22473208 | validated |
| mirtarbase | hsa-miR-192-5p  | FBXO5    | 26271 | ENSG00000112029 | 19074876 | validated |
| mirtarbase | hsa-miR-192-5p  | FBXO4    | 26272 | ENSG00000151876 | 19074876 | validated |
| mirtarbase | hsa-miR-192-5p  | FBXO3    | 26273 | ENSG00000110429 | 19074876 | validated |
| mirtarbase | hsa-miR-21-5p   | FBXO3    | 26273 | ENSG00000110429 | 18591254 | validated |
| mirtarbase | hsa-miR-15b-5p  | VPS33B   | 26276 | ENSG00000184056 | 22473208 | validated |
| mirtarbase | hsa-miR-106b-5p | SACS     | 26278 | ENSG00000151835 | 22473208 | validated |
| mirtarbase | hsa-miR-21-5p   | SLC17A5  | 26503 | ENSG00000119899 | 18591254 | validated |
| mirtarbase | hsa-miR-326     | CNNM4    | 26504 | ENSG00000158158 | 23592263 | validated |
| mirtarbase | hsa-miR-15b-5p  | HEYL     | 26508 | ENSG00000163909 | 23592263 | validated |

|            |                 |          |       |                 |          |           |
|------------|-----------------|----------|-------|-----------------|----------|-----------|
| mirTarbase | hsa-miR-15b-5p  | TIMM13   | 26517 | ENSG00000099800 | 22473208 | validated |
| mirTarbase | hsa-miR-106b-5p | AGO1     | 26523 | ENSG00000092847 | 17242205 | validated |
| mirTarbase | hsa-miR-326     | AGO1     | 26523 | ENSG00000092847 | 23622248 | validated |
| mirTarbase | hsa-miR-212-3p  | AGO1     | 26523 | ENSG00000092847 | 23622248 | validated |
| mirTarbase | hsa-miR-222-3p  | DAZAP1   | 26528 | ENSG00000071626 | 23622248 | validated |
| mirTarbase | hsa-miR-181a-5p | OR11A1   | 26531 | ENSG00000232289 | 17612493 | validated |
| mirTarbase | hsa-miR-192-5p  | PCOLCE2  | 26577 | ENSG00000163710 | 19074876 | validated |
| mirTarbase | hsa-miR-106b-5p | BSCL2    | 26580 | ENSG00000168000 | 23592263 | validated |
| mirTarbase | hsa-miR-222-3p  | CKAP2    | 26586 | ENSG00000136108 | 23622248 | validated |
| mirTarbase | hsa-miR-106b-5p | CKAP2    | 26586 | ENSG00000136108 | 20371350 | validated |
| mirTarbase | hsa-miR-192-5p  | NUFIP1   | 26747 | ENSG00000083635 | 19074876 | validated |
| mirTarbase | hsa-miR-106b-5p | HBP1     | 26959 | ENSG00000105856 | 22473208 | validated |
| mirTarbase | hsa-miR-301a-3p | HBP1     | 26959 | ENSG00000105856 | 23592263 | validated |
| mirTarbase | hsa-miR-21-5p   | NBEA     | 26960 | ENSG00000172915 | 18591254 | validated |
| mirTarbase | hsa-miR-18a-5p  | NBEA     | 26960 | ENSG00000172915 | 23622248 | validated |
| mirTarbase | hsa-miR-222-3p  | CHORDC1  | 26973 | ENSG00000110172 | 21572407 | validated |
| mirTarbase | hsa-miR-144-3p  | CHORDC1  | 26973 | ENSG00000110172 | 20371350 | validated |
| mirTarbase | hsa-miR-21-5p   | AP3M1    | 26985 | ENSG00000185009 | 18591254 | validated |
| mirTarbase | hsa-miR-15b-5p  | AP3M1    | 26985 | ENSG00000185009 | 22473208 | validated |
| mirTarbase | hsa-miR-181a-5p | PABPC1   | 26986 | ENSG00000070756 | 23622248 | validated |
| mirTarbase | hsa-miR-21-5p   | RNF11    | 26994 | ENSG00000123091 | 20048743 | validated |
| mirTarbase | hsa-miR-301a-3p | RNF11    | 26994 | ENSG00000123091 | 20371350 | validated |
| mirTarbase | hsa-miR-106b-5p | TPK1     | 27010 | ENSG00000196511 | 22012620 | validated |
| mirTarbase | hsa-miR-144-3p  | BEX3     | 27018 | ENSG00000166681 | 23592263 | validated |
| mirTarbase | hsa-miR-192-5p  | NPHP3    | 27031 | ENSG00000113971 | 19074876 | validated |
| mirTarbase | hsa-miR-18a-5p  | PELP1    | 27043 | ENSG00000141456 | 23622248 | validated |
| mirTarbase | hsa-miR-181a-5p | ANKRD1   | 27063 | ENSG00000148677 | 17612493 | validated |
| mirTarbase | hsa-miR-222-3p  | TSPAN13  | 27075 | ENSG00000106537 | 21572407 | validated |
| mirTarbase | hsa-miR-106b-5p | UQCRQ    | 27089 | ENSG00000164405 | 23622248 | validated |
| mirTarbase | hsa-miR-296-5p  | BBC3     | 27113 | ENSG00000105327 | 21633093 | validated |
| mirTarbase | hsa-miR-582-3p  | DKK3     | 27122 | ENSG00000050165 | 26468775 | validated |
| mirTarbase | hsa-miR-222-3p  | DKK2     | 27123 | ENSG00000155011 | 23587485 | validated |
| mirTarbase | hsa-miR-18a-5p  | AFF4     | 27125 | ENSG00000072364 | 23622248 | validated |
| mirTarbase | hsa-miR-181a-5p | AFF4     | 27125 | ENSG00000072364 | 22473208 | validated |
| mirTarbase | hsa-miR-15b-5p  | AFF4     | 27125 | ENSG00000072364 | 22473208 | validated |
| mirTarbase | hsa-miR-301a-3p | SNX5     | 27131 | ENSG00000089006 | 22291592 | validated |
| mirTarbase | hsa-miR-106b-5p | MORC1    | 27136 | ENSG00000114487 | 22291592 | validated |
| mirTarbase | hsa-miR-505-3p  | INTU     | 27152 | ENSG00000164066 | 23824327 | validated |
| mirTarbase | hsa-miR-106b-5p | ZNF777   | 27153 | ENSG00000196453 | 23622248 | validated |
| mirTarbase | hsa-miR-192-5p  | AGO2     | 27161 | ENSG00000123908 | 19074876 | validated |
| mirTarbase | hsa-miR-21-5p   | AGO2     | 27161 | ENSG00000123908 | 20371350 | validated |
| mirTarbase | hsa-miR-15b-5p  | AGO2     | 27161 | ENSG00000123908 | 23592263 | validated |
| mirTarbase | hsa-miR-222-3p  | AGO2     | 27161 | ENSG00000123908 | 21572407 | validated |
| mirTarbase | hsa-miR-106b-5p | SALL3    | 27164 | ENSG00000263310 | 22012620 | validated |
| mirTarbase | hsa-miR-301a-3p | SALL3    | 27164 | ENSG00000263310 | 22012620 | validated |
| mirTarbase | hsa-miR-192-5p  | SLC39A1  | 27173 | ENSG00000143570 | 19074876 | validated |
| mirTarbase | hsa-miR-301a-3p | SIGLEC9  | 27180 | ENSG00000129450 | 27292025 | validated |
| mirTarbase | hsa-miR-15b-5p  | VPS4A    | 27183 | ENSG00000132612 | 24398324 | validated |
| mirTarbase | hsa-miR-301a-3p | GPR82    | 27197 | ENSG00000171657 | 23824327 | validated |
| mirTarbase | hsa-miR-181a-5p | GPR78    | 27201 | ENSG00000155269 | 23085757 | validated |
| mirTarbase | hsa-miR-181a-5p | NMRK2    | 27231 | ENSG00000077009 | 17612493 | validated |
| mirTarbase | hsa-miR-106b-5p | TNFRSF21 | 27242 | ENSG00000146072 | 22473208 | validated |
| mirTarbase | hsa-miR-106b-5p | SESN1    | 27244 | ENSG00000080546 | 27292025 | validated |
| mirTarbase | hsa-miR-106b-5p | RNF115   | 27246 | ENSG00000265491 | 23313552 | validated |
| mirTarbase | hsa-miR-106b-5p | MMADHC   | 27249 | ENSG00000168288 | 23622248 | validated |
| mirTarbase | hsa-miR-15b-5p  | PDCD4    | 27250 | ENSG00000150593 | 22473208 | validated |
| mirTarbase | hsa-miR-106b-5p | KLHL20   | 27252 | ENSG00000076321 | 22473208 | validated |
| mirTarbase | hsa-miR-106b-5p | LSM3     | 27258 | ENSG00000170860 | 23824327 | validated |
| mirTarbase | hsa-miR-192-5p  | DIMT1    | 27292 | ENSG00000086189 | 19074876 | validated |
| mirTarbase | hsa-miR-192-5p  | PDLIM3   | 27295 | ENSG00000154553 | 19074876 | validated |
| mirTarbase | hsa-miR-106b-5p | CRCP     | 27297 | ENSG00000241258 | 23446348 | validated |
| mirTarbase | hsa-miR-326     | MOCS3    | 27304 | ENSG00000124217 | 23824327 | validated |
| mirTarbase | hsa-miR-106b-5p | RAB30    | 27314 | ENSG00000137502 | 22473208 | validated |
| mirTarbase | hsa-miR-144-3p  | TNRC18P2 | 27320 |                 | 21572407 | validated |
| mirTarbase | hsa-miR-106b-5p | TNRC6A   | 27327 | ENSG00000090905 | 22473208 | validated |
| mirTarbase | hsa-miR-301a-3p | TNRC6A   | 27327 | ENSG00000090905 | 23592263 | validated |
| mirTarbase | hsa-miR-582-5p  | TNRC6A   | 27327 | ENSG00000090905 | 23592263 | validated |
| mirTarbase | hsa-miR-192-5p  | KCNMB4   | 27345 | ENSG00000135643 | 19074876 | validated |
| mirTarbase | hsa-miR-505-3p  | KCNMB4   | 27345 | ENSG00000135643 | 23824327 | validated |
| mirTarbase | hsa-miR-192-5p  | TOR1B    | 27348 | ENSG00000136816 | 19074876 | validated |
| mirTarbase | hsa-miR-106b-5p | POLM     | 27434 | ENSG00000122678 | 23824327 | validated |

|            |                 |          |       |                 |          |           |
|------------|-----------------|----------|-------|-----------------|----------|-----------|
| mirTarbase | hsa-miR-212-3p  | EML4     | 27436 | ENSG00000143924 | 23592263 | validated |
| mirTarbase | hsa-miR-192-5p  | PPP2R3B  | 28227 | ENSG00000276438 | 19074876 | validated |
| mirTarbase | hsa-miR-192-5p  | SLCO3A1  | 28232 | ENSG00000176463 | 19074876 | validated |
| mirTarbase | hsa-miR-15b-5p  | SLCO3A1  | 28232 | ENSG00000176463 | 23313552 | validated |
| mirTarbase | hsa-miR-106b-5p | NKIRAS1  | 28512 | ENSG00000197885 | 20371350 | validated |
| mirTarbase | hsa-miR-106b-5p | TRIB2    | 28951 | ENSG00000071575 | 23622248 | validated |
| mirTarbase | hsa-miR-106b-5p | OSTM1    | 28962 | ENSG00000081087 | 17242205 | validated |
| mirTarbase | hsa-miR-106b-5p | C11orf54 | 28970 | ENSG00000182919 | 23313552 | validated |
| mirTarbase | hsa-miR-106b-5p | SPCS1    | 28972 | ENSG00000114902 | 23824327 | validated |
| mirTarbase | hsa-miR-181a-5p | TMEM14A  | 28978 | ENSG00000096092 | 17612493 | validated |
| mirTarbase | hsa-miR-192-5p  | FLVCR1   | 28982 | ENSG00000162769 | 19074876 | validated |
| mirTarbase | hsa-miR-192-5p  | NOB1     | 28987 | ENSG00000141101 | 19074876 | validated |
| mirTarbase | hsa-miR-326     | NOB1     | 28987 | ENSG00000141101 | 23869222 | validated |
| mirTarbase | hsa-miR-222-3p  | DBNL     | 28988 | ENSG00000136279 | 23622248 | validated |
| mirTarbase | hsa-miR-181a-5p | HIPK2    | 28996 | ENSG00000064393 | 21274007 | validated |
| mirTarbase | hsa-miR-222-3p  | HIPK2    | 28996 | ENSG00000064393 | 23622248 | validated |
| mirTarbase | hsa-miR-192-5p  | MRPL13   | 28998 | ENSG00000172172 | 19074876 | validated |
| mirTarbase | hsa-miR-106b-5p | ATAD2    | 29028 | ENSG00000156802 | 17242205 | validated |
| mirTarbase | hsa-miR-192-5p  | ATAD2    | 29028 | ENSG00000156802 | 19074876 | validated |
| mirTarbase | hsa-miR-15b-5p  | C16orf72 | 29035 | ENSG00000182831 | 22473208 | validated |
| mirTarbase | hsa-miR-106b-5p | SETD2    | 29072 | ENSG00000181555 | 23622248 | validated |
| mirTarbase | hsa-miR-21-5p   | SETD2    | 29072 | ENSG00000181555 | 24983504 | validated |
| mirTarbase | hsa-miR-181a-5p | PHPT1    | 29085 | ENSG00000054148 | 23622248 | validated |
| mirTarbase | hsa-miR-181a-5p | LGALS1   | 29094 | ENSG00000119862 | 20371350 | validated |
| mirTarbase | hsa-miR-15b-5p  | SSU72    | 29101 | ENSG00000160075 | 21572407 | validated |
| mirTarbase | hsa-miR-505-3p  | DROSHA   | 29102 | ENSG00000113360 | 23622248 | validated |
| mirTarbase | hsa-miR-222-3p  | MYLIP    | 29116 | ENSG00000007944 | 23446348 | validated |
| mirTarbase | hsa-miR-106b-5p | MYLIP    | 29116 | ENSG00000007944 | 23592263 | validated |
| mirTarbase | hsa-miR-301a-3p | MYLIP    | 29116 | ENSG00000007944 | 20371350 | validated |
| mirTarbase | hsa-miR-15b-5p  | CLEC2D   | 29121 | ENSG00000069493 | 20371350 | validated |
| mirTarbase | hsa-miR-582-5p  | ANKRD11  | 29123 | ENSG00000167522 | 23592263 | validated |
| mirTarbase | hsa-miR-144-3p  | ANKRD11  | 29123 | ENSG00000167522 | 23592263 | validated |
| mirTarbase | hsa-miR-326     | CD274    | 29126 | ENSG00000120217 | 24577056 | validated |
| mirTarbase | hsa-miR-15b-5p  | CD274    | 29126 | ENSG00000120217 | 27292025 | validated |
| mirTarbase | hsa-miR-192-5p  | RACGAP1  | 29127 | ENSG00000161800 | 19074876 | validated |
| mirTarbase | hsa-miR-15b-5p  | RACGAP1  | 29127 | ENSG00000161800 | 21572407 | validated |
| mirTarbase | hsa-miR-106b-5p | RACGAP1  | 29127 | ENSG00000161800 | 20371350 | validated |
| mirTarbase | hsa-miR-301a-3p | RACGAP1  | 29127 | ENSG00000161800 | 20371350 | validated |
| mirTarbase | hsa-miR-144-3p  | USP25    | 29761 | ENSG00000155313 | 20371350 | validated |
| mirTarbase | hsa-miR-505-3p  | TMOD3    | 29766 | ENSG00000138594 | 23622248 | validated |
| mirTarbase | hsa-miR-301a-3p | TMOD3    | 29766 | ENSG00000138594 | 23592263 | validated |
| mirTarbase | hsa-miR-106b-5p | TMOD3    | 29766 | ENSG00000138594 | 23313552 | validated |
| mirTarbase | hsa-miR-15b-5p  | CARD10   | 29775 | ENSG00000100065 | 23592263 | validated |
| mirTarbase | hsa-miR-222-3p  | OLA1     | 29789 | ENSG00000138430 | 23622248 | validated |
| mirTarbase | hsa-miR-296-5p  | ZDHHC8   | 29801 | ENSG00000099904 | 19536157 | validated |
| mirTarbase | hsa-miR-192-5p  | GRHL1    | 29841 | ENSG00000134317 | 19074876 | validated |
| mirTarbase | hsa-miR-192-5p  | TFCP2L1  | 29842 | ENSG00000115112 | 19074876 | validated |
| mirTarbase | hsa-miR-192-5p  | SENP1    | 29843 | ENSG00000079387 | 19074876 | validated |
| mirTarbase | hsa-miR-106b-5p | SENP1    | 29843 | ENSG00000079387 | 22473208 | validated |
| mirTarbase | hsa-miR-106b-5p | CNOT7    | 29883 | ENSG00000198791 | 23622248 | validated |
| mirTarbase | hsa-miR-192-5p  | SNX10    | 29887 | ENSG00000086300 | 19074876 | validated |
| mirTarbase | hsa-miR-222-3p  | RBM15B   | 29890 | ENSG00000259956 | 23622248 | validated |
| mirTarbase | hsa-miR-192-5p  | PSMC3IP  | 29893 | ENSG00000131470 | 19074876 | validated |
| mirTarbase | hsa-miR-192-5p  | GPSM2    | 29899 | ENSG00000121957 | 19074876 | validated |
| mirTarbase | hsa-miR-192-5p  | UBIAD1   | 29914 | ENSG00000120942 | 19074876 | validated |
| mirTarbase | hsa-miR-222-3p  | UBIAD1   | 29914 | ENSG00000120942 | 23622248 | validated |
| mirTarbase | hsa-miR-15b-5p  | HCFC2    | 29915 | ENSG00000111727 | 21572407 | validated |
| mirTarbase | hsa-miR-15b-5p  | SNX11    | 29916 | ENSG00000002919 | 22473208 | validated |
| mirTarbase | hsa-miR-18a-5p  | SEC61A1  | 29927 | ENSG00000058262 | 23592263 | validated |
| mirTarbase | hsa-miR-15b-5p  | SEC61A1  | 29927 | ENSG00000058262 | 26701625 | validated |
| mirTarbase | hsa-miR-21-5p   | DSE      | 29940 | ENSG00000111817 | 18591254 | validated |
| mirTarbase | hsa-miR-21-5p   | PURG     | 29942 | ENSG00000172733 | 23446348 | validated |
| mirTarbase | hsa-miR-301a-3p | PURG     | 29942 | ENSG00000172733 | 21572407 | validated |
| mirTarbase | hsa-miR-18a-5p  | SERTAD3  | 29946 | ENSG00000167565 | 20371350 | validated |
| mirTarbase | hsa-miR-222-3p  | CERS2    | 29956 | ENSG00000143418 | 22393241 | validated |
| mirTarbase | hsa-miR-106b-5p | NRBP1    | 29959 | ENSG00000115216 | 22473208 | validated |
| mirTarbase | hsa-miR-222-3p  | PRICKLE4 | 29964 | ENSG00000278224 | 23622248 | validated |
| mirTarbase | hsa-miR-106b-5p | PRICKLE4 | 29964 | ENSG00000278224 | 23592263 | validated |
| mirTarbase | hsa-miR-106b-5p | LRP12    | 29967 | ENSG00000147650 | 20371350 | validated |
| mirTarbase | hsa-miR-15b-5p  | PSAT1    | 29968 | ENSG00000135069 | 22473208 | validated |
| mirTarbase | hsa-miR-18a-5p  | PSAT1    | 29968 | ENSG00000135069 | 23592263 | validated |



|            |                 |         |       |                 |          |           |
|------------|-----------------|---------|-------|-----------------|----------|-----------|
| mirtarbase | hsa-miR-106b-5p | A1CF    | 29974 | ENSG00000148584 | 22100165 | validated |
| mirtarbase | hsa-miR-301a-3p | NRBF2   | 29982 | ENSG00000148572 | 24398324 | validated |
| mirtarbase | hsa-miR-582-5p  | BICRA   | 29998 | ENSG00000063169 | 20371350 | validated |
| mirtarbase | hsa-miR-106b-5p | ERO1A   | 30001 | ENSG00000197930 | 23622248 | validated |
| mirtarbase | hsa-miR-582-5p  | ERO1A   | 30001 | ENSG00000197930 | 26701625 | validated |
| mirtarbase | hsa-miR-106b-5p | DNTTIP2 | 30836 | ENSG00000067334 | 23446348 | validated |
| mirtarbase | hsa-miR-106b-5p | SOCS7   | 30837 | ENSG00000274211 | 21572407 | validated |
| mirtarbase | hsa-miR-144-3p  | EHD2    | 30846 | ENSG00000024422 | 26701625 | validated |
| mirtarbase | hsa-miR-192-5p  | PIK3R4  | 30849 | ENSG00000196455 | 16822819 | validated |
| mirtarbase | hsa-miR-222-3p  | MINK1   | 50488 | ENSG00000141503 | 23622248 | validated |
| mirtarbase | hsa-miR-15b-5p  | MINK1   | 50488 | ENSG00000141503 | 22473208 | validated |
| mirtarbase | hsa-miR-106b-5p | MINK1   | 50488 | ENSG00000141503 | 22473208 | validated |
| mirtarbase | hsa-miR-21-5p   | ITSN2   | 50618 | ENSG00000198399 | 18591254 | validated |
| mirtarbase | hsa-miR-144-3p  | ITSN2   | 50618 | ENSG00000198399 | 23592263 | validated |
| mirtarbase | hsa-miR-192-5p  | CUZD1   | 50624 | ENSG00000138161 | 19074876 | validated |
| mirtarbase | hsa-miR-21-5p   | DCAF8   | 50717 | ENSG00000132716 | 20048743 | validated |
| mirtarbase | hsa-miR-18a-5p  | DCAF8   | 50717 | ENSG00000132716 | 23592263 | validated |
| mirtarbase | hsa-miR-106b-5p | DCAF8   | 50717 | ENSG00000132716 | 20371350 | validated |
| mirtarbase | hsa-miR-21-5p   | MYEF2   | 50804 | ENSG00000104177 | 18591254 | validated |
| mirtarbase | hsa-miR-192-5p  | IRX4    | 50805 | ENSG00000113430 | 19074876 | validated |
| mirtarbase | hsa-miR-106b-5p | ASAP1   | 50807 | ENSG00000153317 | 23622248 | validated |
| mirtarbase | hsa-miR-192-5p  | COPS7A  | 50813 | ENSG00000111652 | 19074876 | validated |
| mirtarbase | hsa-miR-222-3p  | TRAT1   | 50852 | ENSG00000163519 | 22291592 | validated |
| mirtarbase | hsa-miR-192-5p  | RNF141  | 50862 | ENSG00000110315 | 19074876 | validated |
| mirtarbase | hsa-miR-192-5p  | CDON    | 50937 | ENSG00000064309 | 19074876 | validated |
| mirtarbase | hsa-miR-21-5p   | FOXP3   | 50943 | ENSG00000049768 | 26383248 | validated |
| mirtarbase | hsa-miR-301a-3p | TMED5   | 50999 | ENSG00000117500 | 23622248 | validated |
| mirtarbase | hsa-miR-144-3p  | TMED5   | 50999 | ENSG00000117500 | 23592263 | validated |
| mirtarbase | hsa-miR-192-5p  | MTERF3  | 51001 | ENSG00000156469 | 19074876 | validated |
| mirtarbase | hsa-miR-15b-5p  | ASCC1   | 51008 | ENSG00000138303 | 22100165 | validated |
| mirtarbase | hsa-miR-222-3p  | DERL2   | 51009 | ENSG00000072849 | 23824327 | validated |
| mirtarbase | hsa-miR-505-3p  | FAHD2A  | 51011 | ENSG00000115042 | 23824327 | validated |
| mirtarbase | hsa-miR-222-3p  | EXOSC1  | 51013 | ENSG00000171311 | 23622248 | validated |
| mirtarbase | hsa-miR-222-3p  | TMED7   | 51014 | ENSG00000134970 | 21226887 | validated |
| mirtarbase | hsa-miR-582-5p  | TMED7   | 51014 | ENSG00000134970 | 23592263 | validated |
| mirtarbase | hsa-miR-106b-5p | ISOC1   | 51015 | ENSG00000066583 | 21572407 | validated |
| mirtarbase | hsa-miR-505-3p  | FIS1    | 51024 | ENSG00000214253 | 23622248 | validated |
| mirtarbase | hsa-miR-106b-5p | GOLT1B  | 51026 | ENSG00000111711 | 23622248 | validated |
| mirtarbase | hsa-miR-21-5p   | VPS36   | 51028 | ENSG00000136100 | 18591254 | validated |
| mirtarbase | hsa-miR-106b-5p | ZBTB7B  | 51043 | ENSG00000160685 | 23622248 | validated |
| mirtarbase | hsa-miR-301a-3p | ZBTB7B  | 51043 | ENSG00000160685 | 23592263 | validated |
| mirtarbase | hsa-miR-212-3p  | GMNN    | 51053 | ENSG00000112312 | 27292025 | validated |
| mirtarbase | hsa-miR-15b-5p  | ZNF691  | 51058 | ENSG00000164011 | 23446348 | validated |
| mirtarbase | hsa-miR-222-3p  | DERA    | 51071 | ENSG00000023697 | 23622248 | validated |
| mirtarbase | hsa-miR-15b-5p  | FCF1    | 51077 | ENSG00000119616 | 21572407 | validated |
| mirtarbase | hsa-miR-15b-5p  | SIDT2   | 51092 | ENSG00000149577 | 22100165 | validated |
| mirtarbase | hsa-miR-15b-5p  | SCCPDH  | 51097 | ENSG00000143653 | 23622248 | validated |
| mirtarbase | hsa-miR-106b-5p | SH3GLB1 | 51100 | ENSG00000097033 | 21572407 | validated |
| mirtarbase | hsa-miR-21-5p   | PHF20L1 | 51105 | ENSG00000129292 | 18591254 | validated |
| mirtarbase | hsa-miR-212-3p  | PHF20L1 | 51105 | ENSG00000129292 | 23824327 | validated |
| mirtarbase | hsa-miR-15b-5p  | TFB1M   | 51106 | ENSG00000029639 | 22473208 | validated |
| mirtarbase | hsa-miR-192-5p  | METTL9  | 51108 | ENSG00000197006 | 19074876 | validated |
| mirtarbase | hsa-miR-21-5p   | RDH11   | 51109 | ENSG00000072042 | 17363372 | validated |
| mirtarbase | hsa-miR-301a-3p | RDH11   | 51109 | ENSG00000072042 | 21572407 | validated |
| mirtarbase | hsa-miR-106b-5p | KMT5B   | 51111 | ENSG00000110066 | 22012620 | validated |
| mirtarbase | hsa-miR-106b-5p | ZNF706  | 51123 | ENSG00000120963 | 23622248 | validated |
| mirtarbase | hsa-miR-301a-3p | IER3IP1 | 51124 | ENSG00000134049 | 21572407 | validated |
| mirtarbase | hsa-miR-212-3p  | IER3IP1 | 51124 | ENSG00000134049 | 23313552 | validated |
| mirtarbase | hsa-miR-144-3p  | GOLGA7  | 51125 | ENSG00000147533 | 21572407 | validated |
| mirtarbase | hsa-miR-192-5p  | NAA20   | 51126 | ENSG00000173418 | 19074876 | validated |
| mirtarbase | hsa-miR-15b-5p  | RLIM    | 51132 | ENSG00000131263 | 23622248 | validated |
| mirtarbase | hsa-miR-106b-5p | RLIM    | 51132 | ENSG00000131263 | 21572407 | validated |
| mirtarbase | hsa-miR-18a-5p  | RLIM    | 51132 | ENSG00000131263 | 21572407 | validated |
| mirtarbase | hsa-miR-301a-3p | RLIM    | 51132 | ENSG00000131263 | 21572407 | validated |
| mirtarbase | hsa-miR-181a-5p | RLIM    | 51132 | ENSG00000131263 | 19536157 | validated |
| mirtarbase | hsa-miR-181a-5p | KCTD3   | 51133 | ENSG00000136636 | 17612493 | validated |
| mirtarbase | hsa-miR-192-5p  | IRAK4   | 51135 | ENSG00000198001 | 19074876 | validated |
| mirtarbase | hsa-miR-212-3p  | IRAK4   | 51135 | ENSG00000198001 | 23264652 | validated |
| mirtarbase | hsa-miR-106b-5p | IRAK4   | 51135 | ENSG00000198001 | 23313552 | validated |
| mirtarbase | hsa-miR-192-5p  | RNFT1   | 51136 | ENSG00000189050 | 19074876 | validated |
| mirtarbase | hsa-miR-301a-3p | CERCAM  | 51148 | ENSG00000167123 | 21572407 | validated |

|            |                 |          |       |                 |          |           |
|------------|-----------------|----------|-------|-----------------|----------|-----------|
| mirTarbase | hsa-miR-106b-5p | CERCAM   | 51148 | ENSG00000167123 | 21572407 | validated |
| mirTarbase | hsa-miR-106b-5p | JPT1     | 51155 | ENSG00000189159 | 17242205 | validated |
| mirTarbase | hsa-miR-301a-3p | C3orf18  | 51161 | ENSG00000088543 | 19536157 | validated |
| mirTarbase | hsa-miR-222-3p  | HSPA14   | 51182 | ENSG00000284024 | 23622248 | validated |
| mirTarbase | hsa-miR-192-5p  | CKLF     | 51192 | ENSG00000217555 | 19074876 | validated |
| mirTarbase | hsa-miR-192-5p  | PLCE1    | 51196 | ENSG00000138193 | 19074876 | validated |
| mirTarbase | hsa-miR-192-5p  | NIN      | 51199 | ENSG00000100503 | 19074876 | validated |
| mirTarbase | hsa-miR-21-5p   | NIN      | 51199 | ENSG00000100503 | 18591254 | validated |
| mirTarbase | hsa-miR-106b-5p | NIN      | 51199 | ENSG00000100503 | 23592263 | validated |
| mirTarbase | hsa-miR-181a-5p | NIN      | 51199 | ENSG00000100503 | 22473208 | validated |
| mirTarbase | hsa-miR-192-5p  | ZDHC2    | 51201 | ENSG00000104219 | 19074876 | validated |
| mirTarbase | hsa-miR-301a-3p | ACP6     | 51205 | ENSG00000162836 | 23824327 | validated |
| mirTarbase | hsa-miR-222-3p  | GLRX5    | 51218 | ENSG00000182512 | 23622248 | validated |
| mirTarbase | hsa-miR-18a-5p  | GLRX5    | 51218 | ENSG00000182512 | 23622248 | validated |
| mirTarbase | hsa-miR-582-5p  | GLRX5    | 51218 | ENSG00000182512 | 21572407 | validated |
| mirTarbase | hsa-miR-21-5p   | PHF20    | 51230 | ENSG00000025293 | 18591254 | validated |
| mirTarbase | hsa-miR-15b-5p  | CRIM1    | 51232 | ENSG00000277354 | 24435757 | validated |
| mirTarbase | hsa-miR-18a-5p  | CRIM1    | 51232 | ENSG00000277354 | 22012620 | validated |
| mirTarbase | hsa-miR-192-5p  | CCDC174  | 51244 | ENSG00000154781 | 19074876 | validated |
| mirTarbase | hsa-miR-222-3p  | PAIP2    | 51247 | ENSG00000120727 | 23622248 | validated |
| mirTarbase | hsa-miR-106b-5p | PDZD11   | 51248 | ENSG00000120509 | 22473208 | validated |
| mirTarbase | hsa-miR-301a-3p | PDZD11   | 51248 | ENSG00000120509 | 23592263 | validated |
| mirTarbase | hsa-miR-15b-5p  | TMEM69   | 51249 | ENSG00000159596 | 22473208 | validated |
| mirTarbase | hsa-miR-582-5p  | NT5C3A   | 51251 | ENSG00000122643 | 21572407 | validated |
| mirTarbase | hsa-miR-144-3p  | NT5C3A   | 51251 | ENSG00000122643 | 21572407 | validated |
| mirTarbase | hsa-miR-181a-5p | TBC1D7   | 51256 | ENSG00000145979 | 22473208 | validated |
| mirTarbase | hsa-miR-106b-5p | KLF3     | 51274 | ENSG00000109787 | 22012620 | validated |
| mirTarbase | hsa-miR-106b-5p | DNAJC27  | 51277 | ENSG00000115137 | 22473208 | validated |
| mirTarbase | hsa-miR-582-5p  | IER5     | 51278 | ENSG00000162783 | 27292025 | validated |
| mirTarbase | hsa-miR-15b-5p  | ANKMY1   | 51281 | ENSG00000144504 | 23824327 | validated |
| mirTarbase | hsa-miR-106b-5p | TLR7     | 51284 | ENSG00000196664 | 23313552 | validated |
| mirTarbase | hsa-miR-106b-5p | ERGIC2   | 51290 | ENSG00000087502 | 23592263 | validated |
| mirTarbase | hsa-miR-222-3p  | FAM53C   | 51307 | ENSG00000120709 | 23622248 | validated |
| mirTarbase | hsa-miR-181a-5p | SLC25A37 | 51312 | ENSG00000147454 | 22473208 | validated |
| mirTarbase | hsa-miR-18a-5p  | SLC25A37 | 51312 | ENSG00000147454 | 23446348 | validated |
| mirTarbase | hsa-miR-582-3p  | SLC25A37 | 51312 | ENSG00000147454 | 23824327 | validated |
| mirTarbase | hsa-miR-18a-5p  | MRPL35   | 51318 | ENSG00000132313 | 21572407 | validated |
| mirTarbase | hsa-miR-192-5p  | RSRC1    | 51319 | ENSG00000174891 | 19074876 | validated |
| mirTarbase | hsa-miR-505-3p  | RSRC1    | 51319 | ENSG00000174891 | 21572407 | validated |
| mirTarbase | hsa-miR-15b-5p  | WAC      | 51322 | ENSG00000095787 | 23622248 | validated |
| mirTarbase | hsa-miR-18a-5p  | WAC      | 51322 | ENSG00000095787 | 23622248 | validated |
| mirTarbase | hsa-miR-106b-5p | WAC      | 51322 | ENSG00000095787 | 23592263 | validated |
| mirTarbase | hsa-miR-222-3p  | NGRN     | 51335 | ENSG00000182768 | 23622248 | validated |
| mirTarbase | hsa-miR-192-5p  | THEM6    | 51337 | ENSG00000130193 | 19074876 | validated |
| mirTarbase | hsa-miR-222-3p  | ZBTB7A   | 51341 | ENSG00000178951 | 23622248 | validated |
| mirTarbase | hsa-miR-106b-5p | ZBTB7A   | 51341 | ENSG00000178951 | 22473208 | validated |
| mirTarbase | hsa-miR-144-3p  | ZBTB7A   | 51341 | ENSG00000178951 | 23313552 | validated |
| mirTarbase | hsa-miR-301a-3p | ZBTB7A   | 51341 | ENSG00000178951 | 26701625 | validated |
| mirTarbase | hsa-miR-21-5p   | UBR5     | 51366 | ENSG00000104517 | 18591254 | validated |
| mirTarbase | hsa-miR-106b-5p | UBR5     | 51366 | ENSG00000104517 | 22473208 | validated |
| mirTarbase | hsa-miR-301a-3p | POMP     | 51371 | ENSG00000132963 | 23622248 | validated |
| mirTarbase | hsa-miR-192-5p  | CRLF3    | 51379 | ENSG00000176390 | 19074876 | validated |
| mirTarbase | hsa-miR-181a-5p | WNT16    | 51384 | ENSG00000002745 | 17612493 | validated |
| mirTarbase | hsa-miR-301a-3p | NIP7     | 51388 | ENSG00000132603 | 23824327 | validated |
| mirTarbase | hsa-miR-15b-5p  | AIG1     | 51390 | ENSG00000146416 | 23622248 | validated |
| mirTarbase | hsa-miR-181a-5p | ZNF107   | 51427 | ENSG00000196247 | 21572407 | validated |
| mirTarbase | hsa-miR-106b-5p | ZNF107   | 51427 | ENSG00000196247 | 21572407 | validated |
| mirTarbase | hsa-miR-301a-3p | ZNF107   | 51427 | ENSG00000196247 | 20371350 | validated |
| mirTarbase | hsa-miR-106b-5p | SUCO     | 51430 | ENSG00000094975 | 22473208 | validated |
| mirTarbase | hsa-miR-106b-5p | ANAPC7   | 51434 | ENSG00000196510 | 23622248 | validated |
| mirTarbase | hsa-miR-106b-5p | YTHDF2   | 51441 | ENSG00000198492 | 23622248 | validated |
| mirTarbase | hsa-miR-18a-5p  | RNF138   | 51444 | ENSG00000134758 | 21572407 | validated |
| mirTarbase | hsa-miR-15b-5p  | RNF138   | 51444 | ENSG00000134758 | 22473208 | validated |
| mirTarbase | hsa-miR-192-5p  | GULP1    | 51454 | ENSG00000144366 | 19074876 | validated |
| mirTarbase | hsa-miR-21-5p   | REV1     | 51455 | ENSG00000135945 | 18591254 | validated |
| mirTarbase | hsa-miR-106b-5p | REV1     | 51455 | ENSG00000135945 | 22473208 | validated |
| mirTarbase | hsa-miR-192-5p  | RHCG     | 51458 | ENSG00000140519 | 22100165 | validated |
| mirTarbase | hsa-miR-106b-5p | LIMA1    | 51474 | ENSG00000050405 | 22473208 | validated |
| mirTarbase | hsa-miR-106b-5p | CABP2    | 51475 | ENSG00000167791 | 17242205 | validated |
| mirTarbase | hsa-miR-106b-5p | ANKFY1   | 51479 | ENSG00000185722 | 23622248 | validated |
| mirTarbase | hsa-miR-181a-5p | HACD3    | 51495 | ENSG00000074696 | 17612493 | validated |

|            |                 |          |       |                 |          |           |
|------------|-----------------|----------|-------|-----------------|----------|-----------|
| mirTarbase | hsa-miR-192-5p  | HACD3    | 51495 | ENSG00000074696 | 19074876 | validated |
| mirTarbase | hsa-miR-192-5p  | DTL      | 51514 | ENSG00000143476 | 19074876 | validated |
| mirTarbase | hsa-miR-192-5p  | LARS1    | 51520 | ENSG00000133706 | 19074876 | validated |
| mirTarbase | hsa-miR-21-5p   | LARS1    | 51520 | ENSG00000133706 | 18591254 | validated |
| mirTarbase | hsa-miR-106b-5p | LARS1    | 51520 | ENSG00000133706 | 23622248 | validated |
| mirTarbase | hsa-miR-106b-5p | TMEM138  | 51524 | ENSG00000149483 | 22473208 | validated |
| mirTarbase | hsa-miR-15b-5p  | TMEM138  | 51524 | ENSG00000149483 | 22473208 | validated |
| mirTarbase | hsa-miR-181a-5p | GSKIP    | 51527 | ENSG00000100744 | 22473208 | validated |
| mirTarbase | hsa-miR-21-5p   | VPS54    | 51542 | ENSG00000143952 | 18591254 | validated |
| mirTarbase | hsa-miR-301a-3p | CINP     | 51550 | ENSG00000100865 | 23824327 | validated |
| mirTarbase | hsa-miR-301a-3p | RAB14    | 51552 | ENSG00000119396 | 23592263 | validated |
| mirTarbase | hsa-miR-144-3p  | PEX5L    | 51555 | ENSG00000114757 | 23446348 | validated |
| mirTarbase | hsa-miR-326     | PEX5L    | 51555 | ENSG00000114757 | 22012620 | validated |
| mirTarbase | hsa-miR-106b-5p | LGSN     | 51557 | ENSG00000146166 | 23313552 | validated |
| mirTarbase | hsa-miR-21-5p   | ARMCX3   | 51566 | ENSG00000102401 | 18591254 | validated |
| mirTarbase | hsa-miR-326     | GDE1     | 51573 | ENSG00000006007 | 23824327 | validated |
| mirTarbase | hsa-miR-21-5p   | TRIM33   | 51592 | ENSG00000197323 | 18591254 | validated |
| mirTarbase | hsa-miR-222-3p  | SRRT     | 51593 | ENSG00000087087 | 23622248 | validated |
| mirTarbase | hsa-miR-192-5p  | TAF9B    | 51616 | ENSG00000187325 | 19074876 | validated |
| mirTarbase | hsa-miR-192-5p  | CCZ1     | 51622 | ENSG00000122674 | 19074876 | validated |
| mirTarbase | hsa-miR-144-3p  | DYNC2L11 | 51626 | ENSG00000138036 | 21572407 | validated |
| mirTarbase | hsa-miR-222-3p  | LUC7L2   | 51631 | ENSG00000146963 | 23622248 | validated |
| mirTarbase | hsa-miR-15b-5p  | PPIL1    | 51645 | ENSG00000137168 | 23622248 | validated |
| mirTarbase | hsa-miR-15b-5p  | CHMP3    | 51652 | ENSG00000115561 | 22473208 | validated |
| mirTarbase | hsa-miR-181a-5p | FKBP7    | 51661 | ENSG00000079150 | 17612493 | validated |
| mirTarbase | hsa-miR-505-3p  | ASB1     | 51665 | ENSG00000065802 | 23622248 | validated |
| mirTarbase | hsa-miR-106b-5p | ASB1     | 51665 | ENSG00000065802 | 22473208 | validated |
| mirTarbase | hsa-miR-181a-5p | ASB1     | 51665 | ENSG00000065802 | 22473208 | validated |
| mirTarbase | hsa-miR-192-5p  | SARAF    | 51669 | ENSG00000133872 | 19074876 | validated |
| mirTarbase | hsa-miR-106b-5p | HECA     | 51696 | ENSG00000112406 | 22473208 | validated |
| mirTarbase | hsa-miR-192-5p  | NLK      | 51701 | ENSG00000087095 | 19074876 | validated |
| mirTarbase | hsa-miR-192-5p  | RAB23    | 51715 | ENSG00000112210 | 19074876 | validated |
| mirTarbase | hsa-miR-18a-5p  | RAB23    | 51715 | ENSG00000112210 | 20371350 | validated |
| mirTarbase | hsa-miR-15b-5p  | RAB23    | 51715 | ENSG00000112210 | 21572407 | validated |
| mirTarbase | hsa-miR-192-5p  | CMPK1    | 51727 | ENSG00000162368 | 19074876 | validated |
| mirTarbase | hsa-miR-106b-5p | CMPK1    | 51727 | ENSG00000162368 | 22473208 | validated |
| mirTarbase | hsa-miR-21-5p   | RAPGEF6  | 51735 | ENSG00000158987 | 18591254 | validated |
| mirTarbase | hsa-miR-106b-5p | ARID4B   | 51742 | ENSG00000054267 | 22473208 | validated |
| mirTarbase | hsa-miR-15b-5p  | LUC7L3   | 51747 | ENSG00000108848 | 22100165 | validated |
| mirTarbase | hsa-miR-106b-5p | ERAP1    | 51752 | ENSG00000164307 | 22473208 | validated |
| mirTarbase | hsa-miR-192-5p  | RAB8B    | 51762 | ENSG00000166128 | 19074876 | validated |
| mirTarbase | hsa-miR-15b-5p  | TM7SF3   | 51768 | ENSG00000064115 | 21572407 | validated |
| mirTarbase | hsa-miR-21-5p   | RSF1     | 51773 | ENSG00000048649 | 18591254 | validated |
| mirTarbase | hsa-miR-181a-5p | RSF1     | 51773 | ENSG00000048649 | 22100165 | validated |
| mirTarbase | hsa-miR-192-5p  | SIX4     | 51804 | ENSG00000100625 | 20371350 | validated |
| mirTarbase | hsa-miR-582-5p  | SIX4     | 51804 | ENSG00000100625 | 20371350 | validated |
| mirTarbase | hsa-miR-144-3p  | SIX4     | 51804 | ENSG00000100625 | 20371350 | validated |
| mirTarbase | hsa-miR-192-5p  | COQ3     | 51805 | ENSG00000132423 | 19074876 | validated |
| mirTarbase | hsa-miR-301a-3p | PHAX     | 51808 | ENSG00000164902 | 23622248 | validated |
| mirTarbase | hsa-miR-222-3p  | PHAX     | 51808 | ENSG00000164902 | 23622248 | validated |
| mirTarbase | hsa-miR-106b-5p | CHIC1    | 53344 | ENSG00000204116 | 22473208 | validated |
| mirTarbase | hsa-miR-301a-3p | CHIC1    | 53344 | ENSG00000204116 | 21572407 | validated |
| mirTarbase | hsa-miR-15b-5p  | CHIC1    | 53344 | ENSG00000204116 | 23446348 | validated |
| mirTarbase | hsa-miR-144-3p  | PANK1    | 53354 | ENSG00000152782 | 23313552 | validated |
| mirTarbase | hsa-miR-15b-5p  | PANK1    | 53354 | ENSG00000152782 | 22473208 | validated |
| mirTarbase | hsa-miR-181a-5p | FXYD6    | 53826 | ENSG00000137726 | 17612493 | validated |
| mirTarbase | hsa-miR-106b-5p | FXYD5    | 53827 | ENSG00000089327 | 23446348 | validated |
| mirTarbase | hsa-miR-505-3p  | IL20RB   | 53833 | ENSG00000174564 | 23446348 | validated |
| mirTarbase | hsa-miR-582-5p  | IL20RB   | 53833 | ENSG00000174564 | 23446348 | validated |
| mirTarbase | hsa-miR-144-3p  | IL20RB   | 53833 | ENSG00000174564 | 23446348 | validated |
| mirTarbase | hsa-miR-21-5p   | FGFRL1   | 53834 | ENSG00000127418 | 22473208 | validated |
| mirTarbase | hsa-miR-15b-5p  | C11orf24 | 53838 | ENSG00000171067 | 21572407 | validated |
| mirTarbase | hsa-miR-222-3p  | CSNK1G1  | 53944 | ENSG00000169118 | 23622248 | validated |
| mirTarbase | hsa-miR-326     | A4GALT   | 53947 | ENSG00000128274 | 23824327 | validated |
| mirTarbase | hsa-miR-106b-5p | BRWD1    | 54014 | ENSG00000185658 | 23622248 | validated |
| mirTarbase | hsa-miR-192-5p  | BRWD1    | 54014 | ENSG00000185658 | 23622248 | validated |
| mirTarbase | hsa-miR-301a-3p | BRWD1    | 54014 | ENSG00000185658 | 21572407 | validated |
| mirTarbase | hsa-miR-212-3p  | BRWD1    | 54014 | ENSG00000185658 | 21572407 | validated |
| mirTarbase | hsa-miR-222-3p  | BRWD1    | 54014 | ENSG00000185658 | 23313552 | validated |
| mirTarbase | hsa-miR-192-5p  | SETD4    | 54093 | ENSG00000185917 | 16822819 | validated |
| mirTarbase | hsa-miR-192-5p  | C21orf91 | 54149 | ENSG00000154642 | 19074876 | validated |

|            |                 |         |       |                 |          |           |
|------------|-----------------|---------|-------|-----------------|----------|-----------|
| mirTarbase | hsa-miR-106b-5p | DCUN1D1 | 54165 | ENSG00000043093 | 23622248 | validated |
| mirTarbase | hsa-miR-144-3p  | DCUN1D1 | 54165 | ENSG00000043093 | 21572407 | validated |
| mirTarbase | hsa-miR-192-5p  | CYCS    | 54205 | ENSG00000172115 | 23446348 | validated |
| mirTarbase | hsa-miR-106b-5p | CYCS    | 54205 | ENSG00000172115 | 23446348 | validated |
| mirTarbase | hsa-miR-18a-5p  | ERRF1   | 54206 | ENSG00000116285 | 23622248 | validated |
| mirTarbase | hsa-miR-505-3p  | TREM1   | 54210 | ENSG00000124731 | 23824327 | validated |
| mirTarbase | hsa-miR-301a-3p | SLC38A2 | 54407 | ENSG00000134294 | 23592263 | validated |
| mirTarbase | hsa-miR-212-3p  | SLC38A2 | 54407 | ENSG00000134294 | 23592263 | validated |
| mirTarbase | hsa-miR-181a-5p | SLC38A2 | 54407 | ENSG00000134294 | 22473208 | validated |
| mirTarbase | hsa-miR-106b-5p | DNAJC10 | 54431 | ENSG00000077232 | 23446348 | validated |
| mirTarbase | hsa-miR-15b-5p  | DNAJC10 | 54431 | ENSG00000077232 | 21572407 | validated |
| mirTarbase | hsa-miR-15b-5p  | RBM27   | 54439 | ENSG00000091009 | 23622248 | validated |
| mirTarbase | hsa-miR-582-5p  | RBM27   | 54439 | ENSG00000091009 | 23592263 | validated |
| mirTarbase | hsa-miR-301a-3p | RBM27   | 54439 | ENSG00000091009 | 23824327 | validated |
| mirTarbase | hsa-miR-192-5p  | ANLN    | 54443 | ENSG00000011426 | 19074876 | validated |
| mirTarbase | hsa-miR-21-5p   | ATAD2B  | 54454 | ENSG00000119778 | 18591254 | validated |
| mirTarbase | hsa-miR-106b-5p | CCSER2  | 54462 | ENSG00000107771 | 22473208 | validated |
| mirTarbase | hsa-miR-106b-5p | ANKIB1  | 54467 | ENSG00000001629 | 22473208 | validated |
| mirTarbase | hsa-miR-181a-5p | ZFAND6  | 54469 | ENSG00000086666 | 23446348 | validated |
| mirTarbase | hsa-miR-222-3p  | NLE1    | 54475 | ENSG00000073536 | 23622248 | validated |
| mirTarbase | hsa-miR-106b-5p | RNF216  | 54476 | ENSG00000011275 | 22473208 | validated |
| mirTarbase | hsa-miR-144-3p  | NEURL1B | 54492 | ENSG00000214357 | 24398324 | validated |
| mirTarbase | hsa-miR-106b-5p | TMX3    | 54495 | ENSG00000166479 | 22473208 | validated |
| mirTarbase | hsa-miR-301a-3p | TMCO1   | 54499 | ENSG00000143183 | 23824327 | validated |
| mirTarbase | hsa-miR-326     | RBM47   | 54502 | ENSG00000163694 | 22012620 | validated |
| mirTarbase | hsa-miR-505-3p  | PUS7    | 54517 | ENSG00000091127 | 23622248 | validated |
| mirTarbase | hsa-miR-192-5p  | WDR44   | 54521 | ENSG00000131725 | 16822819 | validated |
| mirTarbase | hsa-miR-106b-5p | MIER2   | 54531 | ENSG00000105556 | 23622248 | validated |
| mirTarbase | hsa-miR-15b-5p  | USP53   | 54532 | ENSG00000145390 | 24398324 | validated |
| mirTarbase | hsa-miR-192-5p  | MRPL50  | 54534 | ENSG00000136897 | 19074876 | validated |
| mirTarbase | hsa-miR-222-3p  | SHLD2   | 54537 | ENSG00000122376 | 20371350 | validated |
| mirTarbase | hsa-miR-181a-5p | DDIT4   | 54541 | ENSG00000168209 | 21274007 | validated |
| mirTarbase | hsa-miR-181a-5p | MTMR12  | 54545 | ENSG00000150712 | 17612493 | validated |
| mirTarbase | hsa-miR-192-5p  | MTMR12  | 54545 | ENSG00000150712 | 19074876 | validated |
| mirTarbase | hsa-miR-21-5p   | MTMR12  | 54545 | ENSG00000150712 | 18591254 | validated |
| mirTarbase | hsa-miR-15b-5p  | GNL3L   | 54552 | ENSG00000130119 | 23622248 | validated |
| mirTarbase | hsa-miR-505-3p  | GNL3L   | 54552 | ENSG00000130119 | 23824327 | validated |
| mirTarbase | hsa-miR-582-3p  | GNL3L   | 54552 | ENSG00000130119 | 23824327 | validated |
| mirTarbase | hsa-miR-21-5p   | SGTB    | 54557 | ENSG00000197860 | 22473208 | validated |
| mirTarbase | hsa-miR-106b-5p | SGTB    | 54557 | ENSG00000197860 | 22473208 | validated |
| mirTarbase | hsa-miR-296-5p  | DLL4    | 54567 | ENSG00000128917 | 26500043 | validated |
| mirTarbase | hsa-miR-21-5p   | EGLN1   | 54583 | ENSG00000135766 | 27030384 | validated |
| mirTarbase | hsa-miR-192-5p  | NDFIP2  | 54602 | ENSG00000102471 | 19074876 | validated |
| mirTarbase | hsa-miR-192-5p  | MINDY2  | 54629 | ENSG00000128923 | 19074876 | validated |
| mirTarbase | hsa-miR-181a-5p | TBC1D13 | 54662 | ENSG00000107021 | 22473208 | validated |
| mirTarbase | hsa-miR-192-5p  | RSBN1   | 54665 | ENSG00000081019 | 19074876 | validated |
| mirTarbase | hsa-miR-181a-5p | LRRN3   | 54674 | ENSG00000173114 | 17612493 | validated |
| mirTarbase | hsa-miR-106b-5p | CROT    | 54677 | ENSG00000005469 | 17242205 | validated |
| mirTarbase | hsa-miR-106b-5p | RRN3    | 54700 | ENSG00000278494 | 21572407 | validated |
| mirTarbase | hsa-miR-106b-5p | OTUD4   | 54726 | ENSG00000164164 | 20371350 | validated |
| mirTarbase | hsa-miR-106b-5p | LEPROT  | 54741 | ENSG00000213625 | 21572407 | validated |
| mirTarbase | hsa-miR-192-5p  | EPDR1   | 54749 | ENSG00000086289 | 19074876 | validated |
| mirTarbase | hsa-miR-505-3p  | KLHDC4  | 54758 | ENSG00000104731 | 19536157 | validated |
| mirTarbase | hsa-miR-21-5p   | ZRANB1  | 54764 | ENSG00000019995 | 18591254 | validated |
| mirTarbase | hsa-miR-106b-5p | ZRANB1  | 54764 | ENSG00000019995 | 22473208 | validated |
| mirTarbase | hsa-miR-222-3p  | TRIM44  | 54765 | ENSG00000166326 | 23622248 | validated |
| mirTarbase | hsa-miR-21-5p   | RNF111  | 54778 | ENSG00000157450 | 22473208 | validated |
| mirTarbase | hsa-miR-144-3p  | RNF111  | 54778 | ENSG00000157450 | 23446348 | validated |
| mirTarbase | hsa-miR-212-3p  | ALKBH4  | 54784 | ENSG00000160993 | 23824327 | validated |
| mirTarbase | hsa-miR-106b-5p | MED18   | 54797 | ENSG00000130772 | 23446348 | validated |
| mirTarbase | hsa-miR-326     | MED18   | 54797 | ENSG00000130772 | 23824327 | validated |
| mirTarbase | hsa-miR-301a-3p | MED18   | 54797 | ENSG00000130772 | 23824327 | validated |
| mirTarbase | hsa-miR-21-5p   | KLHL24  | 54800 | ENSG00000114796 | 18591254 | validated |
| mirTarbase | hsa-miR-181a-5p | KLHL24  | 54800 | ENSG00000114796 | 19536157 | validated |
| mirTarbase | hsa-miR-18a-5p  | AHI1    | 54806 | ENSG00000135541 | 23446348 | validated |
| mirTarbase | hsa-miR-181a-5p | ZNF562  | 54811 | ENSG00000171466 | 17612493 | validated |
| mirTarbase | hsa-miR-106b-5p | ZNF562  | 54811 | ENSG00000171466 | 23622248 | validated |
| mirTarbase | hsa-miR-181a-5p | AFTPH   | 54812 | ENSG00000119844 | 20371350 | validated |
| mirTarbase | hsa-miR-21-5p   | AFTPH   | 54812 | ENSG00000119844 | 18591254 | validated |
| mirTarbase | hsa-miR-106b-5p | KLHL28  | 54813 | ENSG00000179454 | 22473208 | validated |
| mirTarbase | hsa-miR-15b-5p  | GATAD2A | 54815 | ENSG00000167491 | 26701625 | validated |

|            |                 |           |       |                 |          |           |
|------------|-----------------|-----------|-------|-----------------|----------|-----------|
| mirtarbase | hsa-miR-18a-5p  | GATAD2A   | 54815 | ENSG00000167491 | 26701625 | validated |
| mirtarbase | hsa-miR-192-5p  | NDE1      | 54820 | ENSG00000275911 | 19074876 | validated |
| mirtarbase | hsa-miR-192-5p  | ERCC6L    | 54821 | ENSG00000186871 | 19074876 | validated |
| mirtarbase | hsa-miR-222-3p  | ERCC6L    | 54821 | ENSG00000186871 | 23622248 | validated |
| mirtarbase | hsa-miR-21-5p   | TRPM7     | 54822 | ENSG00000092439 | 18591254 | validated |
| mirtarbase | hsa-miR-326     | BCAS3     | 54828 | ENSG00000141376 | 28735896 | validated |
| mirtarbase | hsa-miR-192-5p  | VPS13C    | 54832 | ENSG00000129003 | 19074876 | validated |
| mirtarbase | hsa-miR-326     | VPS13C    | 54832 | ENSG00000129003 | 23622248 | validated |
| mirtarbase | hsa-miR-106b-5p | VPS13C    | 54832 | ENSG00000129003 | 22473208 | validated |
| mirtarbase | hsa-miR-18a-5p  | GDAP2     | 54834 | ENSG00000196505 | 23622248 | validated |
| mirtarbase | hsa-miR-15b-5p  | BSPRY     | 54836 | ENSG00000119411 | 23824327 | validated |
| mirtarbase | hsa-miR-582-3p  | WBP1L     | 54838 | ENSG00000166272 | 22100165 | validated |
| mirtarbase | hsa-miR-192-5p  | BIVM      | 54841 | ENSG00000134897 | 19074876 | validated |
| mirtarbase | hsa-miR-144-3p  | MFS06     | 54842 | ENSG00000151690 | 23446348 | validated |
| mirtarbase | hsa-miR-106b-5p | TENT5C    | 54855 | ENSG00000183508 | 22473208 | validated |
| mirtarbase | hsa-miR-106b-5p | GON4L     | 54856 | ENSG00000116580 | 23622248 | validated |
| mirtarbase | hsa-miR-222-3p  | PGPEP1    | 54858 | ENSG00000130517 | 22012620 | validated |
| mirtarbase | hsa-miR-21-5p   | SNRK      | 54861 | ENSG00000163788 | 18591254 | validated |
| mirtarbase | hsa-miR-15b-5p  | QRICH1    | 54870 | ENSG00000198218 | 23622248 | validated |
| mirtarbase | hsa-miR-301a-3p | PIGG      | 54872 | ENSG00000174227 | 23824327 | validated |
| mirtarbase | hsa-miR-505-3p  | FNBP1L    | 54874 | ENSG00000137942 | 23622248 | validated |
| mirtarbase | hsa-miR-106b-5p | FNBP1L    | 54874 | ENSG00000137942 | 23446348 | validated |
| mirtarbase | hsa-miR-144-3p  | ZCCHC2    | 54877 | ENSG00000141664 | 23446348 | validated |
| mirtarbase | hsa-miR-222-3p  | DPP8      | 54878 | ENSG00000074603 | 23622248 | validated |
| mirtarbase | hsa-miR-15b-5p  | DPP8      | 54878 | ENSG00000074603 | 22473208 | validated |
| mirtarbase | hsa-miR-192-5p  | BCOR      | 54880 | ENSG00000183337 | 19074876 | validated |
| mirtarbase | hsa-miR-222-3p  | TEX10     | 54881 | ENSG00000136891 | 23622248 | validated |
| mirtarbase | hsa-miR-505-3p  | CWC25     | 54883 | ENSG00000276761 | 23622248 | validated |
| mirtarbase | hsa-miR-192-5p  | UHRF1BP1  | 54887 | ENSG00000065060 | 19074876 | validated |
| mirtarbase | hsa-miR-21-5p   | NSUN2     | 54888 | ENSG00000037474 | 22473208 | validated |
| mirtarbase | hsa-miR-582-3p  | INO80D    | 54891 | ENSG00000114933 | 22291592 | validated |
| mirtarbase | hsa-miR-582-5p  | INO80D    | 54891 | ENSG00000114933 | 21572407 | validated |
| mirtarbase | hsa-miR-144-3p  | INO80D    | 54891 | ENSG00000114933 | 21572407 | validated |
| mirtarbase | hsa-miR-181a-5p | INO80D    | 54891 | ENSG00000114933 | 22473208 | validated |
| mirtarbase | hsa-miR-106b-5p | PXK       | 54899 | ENSG00000168297 | 23592263 | validated |
| mirtarbase | hsa-miR-301a-3p | PXK       | 54899 | ENSG00000168297 | 23592263 | validated |
| mirtarbase | hsa-miR-192-5p  | NSD3      | 54904 | ENSG00000147548 | 19074876 | validated |
| mirtarbase | hsa-miR-21-5p   | NSD3      | 54904 | ENSG00000147548 | 19398721 | validated |
| mirtarbase | hsa-miR-301a-3p | NSD3      | 54904 | ENSG00000147548 | 23622248 | validated |
| mirtarbase | hsa-miR-301a-3p | YTHDF1    | 54915 | ENSG00000149658 | 23622248 | validated |
| mirtarbase | hsa-miR-505-3p  | YTHDF1    | 54915 | ENSG00000149658 | 20371350 | validated |
| mirtarbase | hsa-miR-192-5p  | CMTM6     | 54918 | ENSG00000091317 | 19074876 | validated |
| mirtarbase | hsa-miR-144-3p  | CMTM6     | 54918 | ENSG00000091317 | 20371350 | validated |
| mirtarbase | hsa-miR-106b-5p | OCIAD1    | 54940 | ENSG00000109180 | 23313552 | validated |
| mirtarbase | hsa-miR-301a-3p | RNF125    | 54941 | ENSG00000101695 | 19536157 | validated |
| mirtarbase | hsa-miR-144-3p  | DNAJC28   | 54943 | ENSG00000262911 | 22291592 | validated |
| mirtarbase | hsa-miR-106b-5p | DNAJC28   | 54943 | ENSG00000262911 | 21572407 | validated |
| mirtarbase | hsa-miR-18a-5p  | FAM120C   | 54954 | ENSG00000184083 | 20371350 | validated |
| mirtarbase | hsa-miR-181a-5p | C1orf109  | 54955 | ENSG00000116922 | 17612493 | validated |
| mirtarbase | hsa-miR-192-5p  | PARP16    | 54956 | ENSG00000138617 | 19074876 | validated |
| mirtarbase | hsa-miR-106b-5p | GEMIN8    | 54960 | ENSG00000046647 | 23313552 | validated |
| mirtarbase | hsa-miR-192-5p  | PIGX      | 54965 | ENSG00000163964 | 19074876 | validated |
| mirtarbase | hsa-miR-21-5p   | PIGX      | 54965 | ENSG00000163964 | 18591254 | validated |
| mirtarbase | hsa-miR-106b-5p | SLC35F6   | 54978 | ENSG00000213699 | 22927820 | validated |
| mirtarbase | hsa-miR-15b-5p  | C2orf42   | 54980 | ENSG00000115998 | 22473208 | validated |
| mirtarbase | hsa-miR-192-5p  | CLN6      | 54982 | ENSG00000128973 | 19074876 | validated |
| mirtarbase | hsa-miR-222-3p  | ZNF770    | 54989 | ENSG00000198146 | 23622248 | validated |
| mirtarbase | hsa-miR-18a-5p  | ZNF770    | 54989 | ENSG00000198146 | 23622248 | validated |
| mirtarbase | hsa-miR-106b-5p | ZNF770    | 54989 | ENSG00000198146 | 22473208 | validated |
| mirtarbase | hsa-miR-192-5p  | GID8      | 54994 | ENSG00000101193 | 19074876 | validated |
| mirtarbase | hsa-miR-15b-5p  | AURKAIP1  | 54998 | ENSG00000175756 | 26701625 | validated |
| mirtarbase | hsa-miR-144-3p  | TUG1      | 55000 |                 | 27261864 | validated |
| mirtarbase | hsa-miR-106b-5p | LAMTOR1   | 55004 | ENSG00000149357 | 24398324 | validated |
| mirtarbase | hsa-miR-106b-5p | RMND1     | 55005 | ENSG00000155906 | 23706177 | validated |
| mirtarbase | hsa-miR-15b-5p  | STX17     | 55014 | ENSG00000136874 | 22473208 | validated |
| mirtarbase | hsa-miR-21-5p   | PRPF39    | 55015 | ENSG00000185246 | 20371350 | validated |
| mirtarbase | hsa-miR-106b-5p | C14orf119 | 55017 | ENSG00000179933 | 23313552 | validated |
| mirtarbase | hsa-miR-106b-5p | ANKRD40CL | 55018 | ENSG00000167117 | 17242205 | validated |
| mirtarbase | hsa-miR-21-5p   | PHIP      | 55023 | ENSG00000146247 | 18591254 | validated |
| mirtarbase | hsa-miR-181a-5p | FBXO34    | 55030 | ENSG00000178974 | 17612493 | validated |
| mirtarbase | hsa-miR-21-5p   | USP47     | 55031 | ENSG00000170242 | 18591254 | validated |

|            |                 |          |       |                 |          |           |
|------------|-----------------|----------|-------|-----------------|----------|-----------|
| mirTarbase | hsa-miR-181a-5p | FKBP14   | 55033 | ENSG00000106080 | 23446348 | validated |
| mirTarbase | hsa-miR-144-3p  | FKBP14   | 55033 | ENSG00000106080 | 23446348 | validated |
| mirTarbase | hsa-miR-106b-5p | FKBP14   | 55033 | ENSG00000106080 | 23313552 | validated |
| mirTarbase | hsa-miR-582-3p  | PTCD3    | 55037 | ENSG00000132300 | 27418678 | validated |
| mirTarbase | hsa-miR-192-5p  | CDCA4    | 55038 | ENSG00000170779 | 19074876 | validated |
| mirTarbase | hsa-miR-15b-5p  | CDCA4    | 55038 | ENSG00000170779 | 22473208 | validated |
| mirTarbase | hsa-miR-301a-3p | CDCA4    | 55038 | ENSG00000170779 | 19536157 | validated |
| mirTarbase | hsa-miR-15b-5p  | PLEKHB2  | 55041 | ENSG00000115762 | 26701625 | validated |
| mirTarbase | hsa-miR-106b-5p | ATG16L1  | 55054 | ENSG00000085978 | 24036151 | validated |
| mirTarbase | hsa-miR-106b-5p | C9orf40  | 55071 | ENSG00000135045 | 17242205 | validated |
| mirTarbase | hsa-miR-106b-5p | OXR1     | 55074 | ENSG00000164830 | 22473208 | validated |
| mirTarbase | hsa-miR-144-3p  | OXR1     | 55074 | ENSG00000164830 | 23592263 | validated |
| mirTarbase | hsa-miR-192-5p  | UACA     | 55075 | ENSG00000137831 | 19074876 | validated |
| mirTarbase | hsa-miR-15b-5p  | UACA     | 55075 | ENSG00000137831 | 23622248 | validated |
| mirTarbase | hsa-miR-181a-5p | TMEM45A  | 55076 | ENSG00000181458 | 17612493 | validated |
| mirTarbase | hsa-miR-192-5p  | RADX     | 55086 | ENSG00000147231 | 19074876 | validated |
| mirTarbase | hsa-miR-21-5p   | MED9     | 55090 | ENSG00000141026 | 22473208 | validated |
| mirTarbase | hsa-miR-106b-5p | ATG2B    | 55102 | ENSG00000066739 | 22473208 | validated |
| mirTarbase | hsa-miR-505-3p  | ATG2B    | 55102 | ENSG00000066739 | 21572407 | validated |
| mirTarbase | hsa-miR-181a-5p | ATG2B    | 55102 | ENSG00000066739 | 22473208 | validated |
| mirTarbase | hsa-miR-21-5p   | RALGPS2  | 55103 | ENSG00000116191 | 18591254 | validated |
| mirTarbase | hsa-miR-21-5p   | AGGF1    | 55109 | ENSG00000164252 | 18591254 | validated |
| mirTarbase | hsa-miR-301a-3p | AKIRIN2  | 55122 | ENSG00000135334 | 21572407 | validated |
| mirTarbase | hsa-miR-106b-5p | PIWIL2   | 55124 | ENSG00000197181 | 24906430 | validated |
| mirTarbase | hsa-miR-301a-3p | CEP192   | 55125 | ENSG00000101639 | 23622248 | validated |
| mirTarbase | hsa-miR-192-5p  | TRIM68   | 55128 | ENSG00000167333 | 19074876 | validated |
| mirTarbase | hsa-miR-582-3p  | RBM28    | 55131 | ENSG00000106344 | 23824327 | validated |
| mirTarbase | hsa-miR-505-3p  | RBM28    | 55131 | ENSG00000106344 | 23313552 | validated |
| mirTarbase | hsa-miR-192-5p  | LARP1B   | 55132 | ENSG00000138709 | 19074876 | validated |
| mirTarbase | hsa-miR-21-5p   | FIGN     | 55137 | ENSG00000182263 | 18591254 | validated |
| mirTarbase | hsa-miR-181a-5p | LRRC8D   | 55144 | ENSG00000171492 | 22473208 | validated |
| mirTarbase | hsa-miR-301a-3p | RBM23    | 55147 | ENSG00000100461 | 23824327 | validated |
| mirTarbase | hsa-miR-222-3p  | UBR7     | 55148 | ENSG00000278787 | 23622248 | validated |
| mirTarbase | hsa-miR-106b-5p | MTPAP    | 55149 | ENSG00000107951 | 22012620 | validated |
| mirTarbase | hsa-miR-222-3p  | DARS2    | 55157 | ENSG00000117593 | 23622248 | validated |
| mirTarbase | hsa-miR-192-5p  | RFWD3    | 55159 | ENSG00000168411 | 19074876 | validated |
| mirTarbase | hsa-miR-18a-5p  | PNPO     | 55163 | ENSG00000108439 | 23622248 | validated |
| mirTarbase | hsa-miR-15b-5p  | PNPO     | 55163 | ENSG00000108439 | 22473208 | validated |
| mirTarbase | hsa-miR-192-5p  | CEP55    | 55165 | ENSG00000138180 | 19074876 | validated |
| mirTarbase | hsa-miR-301a-3p | CEP55    | 55165 | ENSG00000138180 | 21572407 | validated |
| mirTarbase | hsa-miR-15b-5p  | CEP55    | 55165 | ENSG00000138180 | 24398324 | validated |
| mirTarbase | hsa-miR-106b-5p | CENPQ    | 55166 | ENSG00000031691 | 23446348 | validated |
| mirTarbase | hsa-miR-21-5p   | CENPQ    | 55166 | ENSG00000031691 | 22473208 | validated |
| mirTarbase | hsa-miR-15b-5p  | TBCCD1   | 55171 | ENSG00000113838 | 22473208 | validated |
| mirTarbase | hsa-miR-21-5p   | MRPS10   | 55173 | ENSG00000048544 | 18591254 | validated |
| mirTarbase | hsa-miR-106b-5p | MRPS10   | 55173 | ENSG00000048544 | 27418678 | validated |
| mirTarbase | hsa-miR-192-5p  | FAIM     | 55179 | ENSG00000158234 | 19074876 | validated |
| mirTarbase | hsa-miR-15b-5p  | RIF1     | 55183 | ENSG00000080345 | 20371350 | validated |
| mirTarbase | hsa-miR-222-3p  | SLC25A36 | 55186 | ENSG00000114120 | 23622248 | validated |
| mirTarbase | hsa-miR-192-5p  | RIC8B    | 55188 | ENSG00000111785 | 19074876 | validated |
| mirTarbase | hsa-miR-21-5p   | PBRM1    | 55193 | ENSG00000163939 | 18591254 | validated |
| mirTarbase | hsa-miR-181a-5p | PBRM1    | 55193 | ENSG00000163939 | 22473208 | validated |
| mirTarbase | hsa-miR-106b-5p | CCDC198  | 55195 | ENSG00000100557 | 23313552 | validated |
| mirTarbase | hsa-miR-21-5p   | RESF1    | 55196 | ENSG00000174718 | 18591254 | validated |
| mirTarbase | hsa-miR-181a-5p | RESF1    | 55196 | ENSG00000174718 | 22473208 | validated |
| mirTarbase | hsa-miR-106b-5p | RESF1    | 55196 | ENSG00000174718 | 23446348 | validated |
| mirTarbase | hsa-miR-505-3p  | MAP1S    | 55201 | ENSG00000130479 | 23622248 | validated |
| mirTarbase | hsa-miR-21-5p   | ZNF532   | 55205 | ENSG00000074657 | 18591254 | validated |
| mirTarbase | hsa-miR-106b-5p | ZNF532   | 55205 | ENSG00000074657 | 22012620 | validated |
| mirTarbase | hsa-miR-15b-5p  | SBNO1    | 55206 | ENSG00000139697 | 23446348 | validated |
| mirTarbase | hsa-miR-212-3p  | SETD5    | 55209 | ENSG00000168137 | 26701625 | validated |
| mirTarbase | hsa-miR-192-5p  | BBS7     | 55212 | ENSG00000138686 | 19074876 | validated |
| mirTarbase | hsa-miR-192-5p  | FANCI    | 55215 | ENSG00000140525 | 19074876 | validated |
| mirTarbase | hsa-miR-21-5p   | FANCI    | 55215 | ENSG00000140525 | 18591254 | validated |
| mirTarbase | hsa-miR-505-3p  | FANCI    | 55215 | ENSG00000140525 | 23622248 | validated |
| mirTarbase | hsa-miR-222-3p  | NKAPD1   | 55216 | ENSG00000150776 | 23622248 | validated |
| mirTarbase | hsa-miR-301a-3p | NKAPD1   | 55216 | ENSG00000150776 | 23592263 | validated |
| mirTarbase | hsa-miR-144-3p  | LRRC1    | 55227 | ENSG00000137269 | 20371350 | validated |
| mirTarbase | hsa-miR-181a-5p | MOB1A    | 55233 | ENSG00000114978 | 20371350 | validated |
| mirTarbase | hsa-miR-222-3p  | OGFOD1   | 55239 | ENSG00000087263 | 23622248 | validated |
| mirTarbase | hsa-miR-326     | SLC47A1  | 55244 | ENSG00000142494 | 23592263 | validated |

|            |                 |            |       |                 |          |           |
|------------|-----------------|------------|-------|-----------------|----------|-----------|
| mirTarbase | hsa-miR-192-5p  | NEIL3      | 55247 | ENSG00000109674 | 19074876 | validated |
| mirTarbase | hsa-miR-222-3p  | YY1AP1     | 55249 | ENSG00000163374 | 23622248 | validated |
| mirTarbase | hsa-miR-326     | ASXL2      | 55252 | ENSG00000143970 | 23622248 | validated |
| mirTarbase | hsa-miR-106b-5p | MAP11      | 55262 | ENSG00000146826 | 22473208 | validated |
| mirTarbase | hsa-miR-192-5p  | NUDT15     | 55270 | ENSG00000136159 | 19074876 | validated |
| mirTarbase | hsa-miR-15b-5p  | TMEM100    | 55273 | ENSG00000166292 | 23446348 | validated |
| mirTarbase | hsa-miR-106b-5p | TMEM100    | 55273 | ENSG00000166292 | 21572407 | validated |
| mirTarbase | hsa-miR-192-5p  | PHF10      | 55274 | ENSG00000130024 | 19074876 | validated |
| mirTarbase | hsa-miR-106b-5p | VPS53      | 55275 | ENSG00000141252 | 23313552 | validated |
| mirTarbase | hsa-miR-106b-5p | CWF19L1    | 55280 | ENSG00000095485 | 23622248 | validated |
| mirTarbase | hsa-miR-192-5p  | UBE2W      | 55284 | ENSG00000104343 | 19074876 | validated |
| mirTarbase | hsa-miR-106b-5p | RBM41      | 55285 | ENSG00000089682 | 23313552 | validated |
| mirTarbase | hsa-miR-106b-5p | PPP6R3     | 55291 | ENSG00000110075 | 21572407 | validated |
| mirTarbase | hsa-miR-301a-3p | PPP6R3     | 55291 | ENSG00000110075 | 21572407 | validated |
| mirTarbase | hsa-miR-15b-5p  | PPP6R3     | 55291 | ENSG00000110075 | 26701625 | validated |
| mirTarbase | hsa-miR-144-3p  | FBXW7      | 55294 | ENSG00000109670 | 26701625 | validated |
| mirTarbase | hsa-miR-15b-5p  | PI4K2B     | 55300 | ENSG00000038210 | 23446348 | validated |
| mirTarbase | hsa-miR-106b-5p | OLAH       | 55301 | ENSG00000152463 | 27418678 | validated |
| mirTarbase | hsa-miR-21-5p   | SPTLC3     | 55304 | ENSG00000172296 | 18591254 | validated |
| mirTarbase | hsa-miR-181a-5p | SPTLC3     | 55304 | ENSG00000172296 | 23824327 | validated |
| mirTarbase | hsa-miR-106b-5p | RFK        | 55312 | ENSG00000135002 | 23313552 | validated |
| mirTarbase | hsa-miR-15b-5p  | RFK        | 55312 | ENSG00000135002 | 27292025 | validated |
| mirTarbase | hsa-miR-15b-5p  | AP5S1      | 55317 | ENSG00000125843 | 23622248 | validated |
| mirTarbase | hsa-miR-192-5p  | MIS18BP1   | 55320 | ENSG00000129534 | 19074876 | validated |
| mirTarbase | hsa-miR-192-5p  | AGPAT5     | 55326 | ENSG00000155189 | 19074876 | validated |
| mirTarbase | hsa-miR-15b-5p  | AGPAT5     | 55326 | ENSG00000155189 | 23622248 | validated |
| mirTarbase | hsa-miR-21-5p   | LIN7C      | 55327 | ENSG00000148943 | 18591254 | validated |
| mirTarbase | hsa-miR-18a-5p  | RNLS       | 55328 | ENSG00000184719 | 23592263 | validated |
| mirTarbase | hsa-miR-192-5p  | MNS1       | 55329 | ENSG00000138587 | 19074876 | validated |
| mirTarbase | hsa-miR-181a-5p | DRAM1      | 55332 | ENSG00000136048 | 22473208 | validated |
| mirTarbase | hsa-miR-106b-5p | SYNJ2BP    | 55333 | ENSG00000213463 | 26701625 | validated |
| mirTarbase | hsa-miR-192-5p  | SLC39A9    | 55334 | ENSG00000029364 | 19074876 | validated |
| mirTarbase | hsa-miR-15b-5p  | SLC39A9    | 55334 | ENSG00000029364 | 23592263 | validated |
| mirTarbase | hsa-miR-106b-5p | WDR33      | 55339 | ENSG00000136709 | 23622248 | validated |
| mirTarbase | hsa-miR-21-5p   | STRBP      | 55342 | ENSG00000165209 | 18591254 | validated |
| mirTarbase | hsa-miR-192-5p  | CHDH       | 55349 | ENSG00000016391 | 19074876 | validated |
| mirTarbase | hsa-miR-181a-5p | LAPTM4B    | 55353 | ENSG00000104341 | 19536157 | validated |
| mirTarbase | hsa-miR-192-5p  | HJURP      | 55355 | ENSG00000123485 | 19074876 | validated |
| mirTarbase | hsa-miR-15b-5p  | TMEM63B    | 55362 | ENSG00000137216 | 23622248 | validated |
| mirTarbase | hsa-miR-106b-5p | LRRC59     | 55379 | ENSG00000108829 | 23622248 | validated |
| mirTarbase | hsa-miR-181a-5p | MEG3       | 55384 |                 | 26253106 | validated |
| mirTarbase | hsa-miR-192-5p  | MCM10      | 55388 | ENSG00000065328 | 19074876 | validated |
| mirTarbase | hsa-miR-181a-5p | YOD1       | 55432 | ENSG00000180667 | 20371350 | validated |
| mirTarbase | hsa-miR-21-5p   | YOD1       | 55432 | ENSG00000180667 | 20371350 | validated |
| mirTarbase | hsa-miR-106b-5p | YOD1       | 55432 | ENSG00000180667 | 22473208 | validated |
| mirTarbase | hsa-miR-144-3p  | YOD1       | 55432 | ENSG00000180667 | 23446348 | validated |
| mirTarbase | hsa-miR-21-5p   | AP1AR      | 55435 | ENSG00000138660 | 22473208 | validated |
| mirTarbase | hsa-miR-15b-5p  | STRADB     | 55437 | ENSG00000082146 | 20371350 | validated |
| mirTarbase | hsa-miR-192-5p  | CSGALNACT2 | 55454 | ENSG00000169826 | 19074876 | validated |
| mirTarbase | hsa-miR-21-5p   | ETNK1      | 55500 | ENSG00000139163 | 18591254 | validated |
| mirTarbase | hsa-miR-15b-5p  | ETNK1      | 55500 | ENSG00000139163 | 23622248 | validated |
| mirTarbase | hsa-miR-192-5p  | CHST12     | 55501 | ENSG00000136213 | 19074876 | validated |
| mirTarbase | hsa-miR-192-5p  | HES6       | 55502 | ENSG00000144485 | 19074876 | validated |
| mirTarbase | hsa-miR-301a-3p | SLC35E3    | 55508 | ENSG00000175782 | 23824327 | validated |
| mirTarbase | hsa-miR-106b-5p | FEM1A      | 55527 | ENSG00000141965 | 23824327 | validated |
| mirTarbase | hsa-miR-144-3p  | MAML3      | 55534 | ENSG00000196782 | 21572407 | validated |
| mirTarbase | hsa-miR-505-3p  | MAML3      | 55534 | ENSG00000196782 | 28735896 | validated |
| mirTarbase | hsa-miR-192-5p  | IL17RB     | 55540 | ENSG00000056736 | 19074876 | validated |
| mirTarbase | hsa-miR-18a-5p  | RBM38      | 55544 | ENSG00000132819 | 21572407 | validated |
| mirTarbase | hsa-miR-192-5p  | ZNF823     | 55552 | ENSG00000197933 | 19074876 | validated |
| mirTarbase | hsa-miR-192-5p  | ENOSF1     | 55556 | ENSG00000132199 | 16822819 | validated |
| mirTarbase | hsa-miR-15b-5p  | CDV3       | 55573 | ENSG00000091527 | 22473208 | validated |
| mirTarbase | hsa-miR-106b-5p | NAGK       | 55577 | ENSG00000124357 | 23446348 | validated |
| mirTarbase | hsa-miR-15b-5p  | UBE2Q1     | 55585 | ENSG00000160714 | 22473208 | validated |
| mirTarbase | hsa-miR-192-5p  | BMP2K      | 55589 | ENSG00000138756 | 19074876 | validated |
| mirTarbase | hsa-miR-505-3p  | OTUD5      | 55593 | ENSG00000068308 | 23622248 | validated |
| mirTarbase | hsa-miR-192-5p  | RNPC3      | 55599 | ENSG00000185946 | 19074876 | validated |
| mirTarbase | hsa-miR-21-5p   | TENT5A     | 55603 | ENSG00000112773 | 18591254 | validated |
| mirTarbase | hsa-miR-181a-5p | PPP1R9A    | 55607 | ENSG00000158528 | 23622248 | validated |
| mirTarbase | hsa-miR-106b-5p | ZNF280C    | 55609 | ENSG00000056277 | 22473208 | validated |
| mirTarbase | hsa-miR-106b-5p | VPS50      | 55610 | ENSG00000004766 | 22100165 | validated |

|            |                 |          |       |                 |          |           |
|------------|-----------------|----------|-------|-----------------|----------|-----------|
| mirTarbase | hsa-miR-15b-5p  | OTUB1    | 55611 | ENSG00000167770 | 22473208 | validated |
| mirTarbase | hsa-miR-192-5p  | FERMT1   | 55612 | ENSG00000101311 | 19074876 | validated |
| mirTarbase | hsa-miR-15b-5p  | TASP1    | 55617 | ENSG00000089123 | 22473208 | validated |
| mirTarbase | hsa-miR-21-5p   | DOCK10   | 55619 | ENSG00000135905 | 18591254 | validated |
| mirTarbase | hsa-miR-222-3p  | POMGNT1  | 55624 | ENSG00000085998 | 23622248 | validated |
| mirTarbase | hsa-miR-181a-5p | PNRC2    | 55629 | ENSG00000189266 | 22473208 | validated |
| mirTarbase | hsa-miR-15b-5p  | PNRC2    | 55629 | ENSG00000189266 | 21572407 | validated |
| mirTarbase | hsa-miR-222-3p  | PNRC2    | 55629 | ENSG00000189266 | 20371350 | validated |
| mirTarbase | hsa-miR-192-5p  | G2E3     | 55632 | ENSG00000092140 | 19074876 | validated |
| mirTarbase | hsa-miR-582-5p  | G2E3     | 55632 | ENSG00000092140 | 23592263 | validated |
| mirTarbase | hsa-miR-192-5p  | TBC1D22B | 55633 | ENSG00000065491 | 19074876 | validated |
| mirTarbase | hsa-miR-181a-5p | KRBOX4   | 55634 | ENSG00000147121 | 21572407 | validated |
| mirTarbase | hsa-miR-192-5p  | DEPDC1   | 55635 | ENSG00000024526 | 19074876 | validated |
| mirTarbase | hsa-miR-301a-3p | DEPDC1   | 55635 | ENSG00000024526 | 21572407 | validated |
| mirTarbase | hsa-miR-192-5p  | CHD7     | 55636 | ENSG00000171316 | 19074876 | validated |
| mirTarbase | hsa-miR-192-5p  | SLC48A1  | 55652 | ENSG00000211584 | 19074876 | validated |
| mirTarbase | hsa-miR-106b-5p | BCAS4    | 55653 | ENSG00000124243 | 23313552 | validated |
| mirTarbase | hsa-miR-106b-5p | TMEM127  | 55654 | ENSG00000135956 | 22473208 | validated |
| mirTarbase | hsa-miR-181a-5p | DDX27    | 55661 | ENSG00000124228 | 23622248 | validated |
| mirTarbase | hsa-miR-106b-5p | HIF1AN   | 55662 | ENSG00000166135 | 22473208 | validated |
| mirTarbase | hsa-miR-106b-5p | ZNF446   | 55663 | ENSG00000083838 | 23313552 | validated |
| mirTarbase | hsa-miR-106b-5p | CDC37L1  | 55664 | ENSG00000106993 | 17242205 | validated |
| mirTarbase | hsa-miR-15b-5p  | CDC37L1  | 55664 | ENSG00000106993 | 22473208 | validated |
| mirTarbase | hsa-miR-106b-5p | NPLOC4   | 55666 | ENSG00000182446 | 23622248 | validated |
| mirTarbase | hsa-miR-106b-5p | MFN1     | 55669 | ENSG00000171109 | 23446348 | validated |
| mirTarbase | hsa-miR-106b-5p | RUFY2    | 55680 | ENSG00000204130 | 21572407 | validated |
| mirTarbase | hsa-miR-21-5p   | KANSL3   | 55683 | ENSG00000114982 | 27292025 | validated |
| mirTarbase | hsa-miR-222-3p  | RABL6    | 55684 | ENSG00000196642 | 23622248 | validated |
| mirTarbase | hsa-miR-301a-3p | MREG     | 55686 | ENSG00000118242 | 27292025 | validated |
| mirTarbase | hsa-miR-296-5p  | TRMU     | 55687 | ENSG00000100416 | 26701625 | validated |
| mirTarbase | hsa-miR-192-5p  | KDM4D    | 55693 | ENSG00000186280 | 19074876 | validated |
| mirTarbase | hsa-miR-222-3p  | NSUN5    | 55695 | ENSG00000130305 | 23622248 | validated |
| mirTarbase | hsa-miR-192-5p  | RADIL    | 55698 | ENSG00000157927 | 19074876 | validated |
| mirTarbase | hsa-miR-18a-5p  | MAP7D1   | 55700 | ENSG00000116871 | 20371350 | validated |
| mirTarbase | hsa-miR-192-5p  | ARHGEF40 | 55701 | ENSG00000165801 | 19074876 | validated |
| mirTarbase | hsa-miR-21-5p   | POLR3B   | 55703 | ENSG00000013503 | 18591254 | validated |
| mirTarbase | hsa-miR-222-3p  | NDC1     | 55706 | ENSG00000058804 | 23622248 | validated |
| mirTarbase | hsa-miR-192-5p  | SLF2     | 55719 | ENSG00000119906 | 19074876 | validated |
| mirTarbase | hsa-miR-106b-5p | TSR1     | 55720 | ENSG00000167721 | 22100165 | validated |
| mirTarbase | hsa-miR-18a-5p  | TSR1     | 55720 | ENSG00000167721 | 23592263 | validated |
| mirTarbase | hsa-miR-192-5p  | IQCC     | 55721 | ENSG00000160051 | 19074876 | validated |
| mirTarbase | hsa-miR-106b-5p | CEP72    | 55722 | ENSG00000112877 | 23446348 | validated |
| mirTarbase | hsa-miR-21-5p   | BTBD7    | 55727 | ENSG00000277222 | 18591254 | validated |
| mirTarbase | hsa-miR-106b-5p | BTBD7    | 55727 | ENSG00000277222 | 22473208 | validated |
| mirTarbase | hsa-miR-192-5p  | N4BP2    | 55728 | ENSG00000078177 | 19074876 | validated |
| mirTarbase | hsa-miR-144-3p  | ATF7IP   | 55729 | ENSG00000171681 | 20371350 | validated |
| mirTarbase | hsa-miR-301a-3p | ATF7IP   | 55729 | ENSG00000171681 | 23824327 | validated |
| mirTarbase | hsa-miR-21-5p   | ATF7IP   | 55729 | ENSG00000171681 | 19536157 | validated |
| mirTarbase | hsa-miR-106b-5p | FAM222B  | 55731 | ENSG00000173065 | 23622248 | validated |
| mirTarbase | hsa-miR-181a-5p | FAM222B  | 55731 | ENSG00000173065 | 23622248 | validated |
| mirTarbase | hsa-miR-192-5p  | C1orf112 | 55732 | ENSG00000000460 | 19074876 | validated |
| mirTarbase | hsa-miR-505-3p  | ZFP64    | 55734 | ENSG00000020256 | 23313552 | validated |
| mirTarbase | hsa-miR-15b-5p  | VPS35    | 55737 | ENSG00000069329 | 23622248 | validated |
| mirTarbase | hsa-miR-181a-5p | ENAH     | 55740 | ENSG00000154380 | 17612493 | validated |
| mirTarbase | hsa-miR-21-5p   | ENAH     | 55740 | ENSG00000154380 | 18591254 | validated |
| mirTarbase | hsa-miR-181a-5p | AP5M1    | 55745 | ENSG00000053770 | 23824327 | validated |
| mirTarbase | hsa-miR-582-5p  | AGK      | 55750 | ENSG00000262327 | 22012620 | validated |
| mirTarbase | hsa-miR-222-3p  | SEPTIN11 | 55752 | ENSG00000138758 | 23622248 | validated |
| mirTarbase | hsa-miR-192-5p  | TMEM30A  | 55754 | ENSG00000112697 | 19074876 | validated |
| mirTarbase | hsa-miR-301a-3p | TMEM30A  | 55754 | ENSG00000112697 | 21572407 | validated |
| mirTarbase | hsa-miR-181a-5p | TMEM30A  | 55754 | ENSG00000112697 | 22473208 | validated |
| mirTarbase | hsa-miR-192-5p  | ZNF701   | 55762 | ENSG00000167562 | 19074876 | validated |
| mirTarbase | hsa-miR-181a-5p | ZNF83    | 55769 | ENSG00000167766 | 24398324 | validated |
| mirTarbase | hsa-miR-192-5p  | TDP1     | 55775 | ENSG00000042088 | 19074876 | validated |
| mirTarbase | hsa-miR-192-5p  | SAYSD1   | 55776 | ENSG00000112167 | 19074876 | validated |
| mirTarbase | hsa-miR-106b-5p | CMTR2    | 55783 | ENSG00000180917 | 22473208 | validated |
| mirTarbase | hsa-miR-181a-5p | ZNF415   | 55786 | ENSG00000170954 | 20371350 | validated |
| mirTarbase | hsa-miR-106b-5p | LRIF1    | 55791 | ENSG00000121931 | 23313552 | validated |
| mirTarbase | hsa-miR-15b-5p  | LRIF1    | 55791 | ENSG00000121931 | 22473208 | validated |
| mirTarbase | hsa-miR-192-5p  | MBNL3    | 55796 | ENSG00000076770 | 19074876 | validated |
| mirTarbase | hsa-miR-301a-3p | MBNL3    | 55796 | ENSG00000076770 | 21572407 | validated |



|            |                 |          |       |                 |          |           |
|------------|-----------------|----------|-------|-----------------|----------|-----------|
| mirTarbase | hsa-miR-192-5p  | DCP1A    | 55802 | ENSG00000272886 | 19074876 | validated |
| mirTarbase | hsa-miR-21-5p   | DCP1A    | 55802 | ENSG00000272886 | 18372920 | validated |
| mirTarbase | hsa-miR-106b-5p | FOXJ2    | 55810 | ENSG00000065970 | 21572407 | validated |
| mirTarbase | hsa-miR-21-5p   | PAG1     | 55824 | ENSG00000076641 | 18591254 | validated |
| mirTarbase | hsa-miR-15b-5p  | PAG1     | 55824 | ENSG00000076641 | 21572407 | validated |
| mirTarbase | hsa-miR-192-5p  | CAND1    | 55832 | ENSG00000111530 | 22100165 | validated |
| mirTarbase | hsa-miR-192-5p  | EAF2     | 55840 | ENSG00000145088 | 19074876 | validated |
| mirTarbase | hsa-miR-192-5p  | WWC3     | 55841 | ENSG00000047644 | 19074876 | validated |
| mirTarbase | hsa-miR-192-5p  | PPP2R2D  | 55844 | ENSG00000175470 | 19074876 | validated |
| mirTarbase | hsa-miR-15b-5p  | BEX1     | 55859 | ENSG00000133169 | 23622248 | validated |
| mirTarbase | hsa-miR-15b-5p  | ASH1L    | 55870 | ENSG00000116539 | 22473208 | validated |
| mirTarbase | hsa-miR-505-3p  | CBWD1    | 55871 | ENSG00000172785 | 24398324 | validated |
| mirTarbase | hsa-miR-106b-5p | UNC45A   | 55898 | ENSG00000140553 | 23622248 | validated |
| mirTarbase | hsa-miR-181a-5p | KMT2E    | 55904 | ENSG00000005483 | 22473208 | validated |
| mirTarbase | hsa-miR-301a-3p | ERBIN    | 55914 | ENSG00000112851 | 22012620 | validated |
| mirTarbase | hsa-miR-192-5p  | RCC2     | 55920 | ENSG00000179051 | 23622248 | validated |
| mirTarbase | hsa-miR-301a-3p | NKRF     | 55922 | ENSG00000186416 | 21113131 | validated |
| mirTarbase | hsa-miR-192-5p  | NKRF     | 55922 | ENSG00000186416 | 19074876 | validated |
| mirTarbase | hsa-miR-326     | NKRF     | 55922 | ENSG00000186416 | 23622248 | validated |
| mirTarbase | hsa-miR-222-3p  | NKRF     | 55922 | ENSG00000186416 | 23622248 | validated |
| mirTarbase | hsa-miR-144-3p  | GNG12    | 55970 | ENSG00000172380 | 24398324 | validated |
| mirTarbase | hsa-miR-15b-5p  | GNG12    | 55970 | ENSG00000172380 | 20371350 | validated |
| mirTarbase | hsa-miR-192-5p  | SLC25A40 | 55972 | ENSG00000075303 | 19074876 | validated |
| mirTarbase | hsa-miR-106b-5p | UBFD1    | 56061 | ENSG00000103353 | 22473208 | validated |
| mirTarbase | hsa-miR-181a-5p | PCDHB8   | 56128 | ENSG00000120322 | 17612493 | validated |
| mirTarbase | hsa-miR-181a-5p | PCDHB6   | 56130 | ENSG00000113211 | 22942087 | validated |
| mirTarbase | hsa-miR-181a-5p | PCDHAC2  | 56134 | ENSG00000243232 | 22942087 | validated |
| mirTarbase | hsa-miR-181a-5p | PCDHAC1  | 56135 | ENSG00000248383 | 22942087 | validated |
| mirTarbase | hsa-miR-181a-5p | PCDHA13  | 56136 | ENSG00000239389 | 22942087 | validated |
| mirTarbase | hsa-miR-181a-5p | PCDHA12  | 56137 | ENSG00000251664 | 22942087 | validated |
| mirTarbase | hsa-miR-181a-5p | PCDHA11  | 56138 | ENSG00000249158 | 22942087 | validated |
| mirTarbase | hsa-miR-181a-5p | PCDHA10  | 56139 | ENSG00000250120 | 22942087 | validated |
| mirTarbase | hsa-miR-181a-5p | PCDHA8   | 56140 | ENSG00000204962 | 22942087 | validated |
| mirTarbase | hsa-miR-181a-5p | PCDHA7   | 56141 | ENSG00000204963 | 22942087 | validated |
| mirTarbase | hsa-miR-181a-5p | PCDHA6   | 56142 | ENSG00000081842 | 22942087 | validated |
| mirTarbase | hsa-miR-181a-5p | PCDHA5   | 56143 | ENSG00000204965 | 22942087 | validated |
| mirTarbase | hsa-miR-181a-5p | PCDHA4   | 56144 | ENSG00000204967 | 22942087 | validated |
| mirTarbase | hsa-miR-181a-5p | PCDHA3   | 56145 | ENSG00000255408 | 22942087 | validated |
| mirTarbase | hsa-miR-181a-5p | PCDHA2   | 56146 | ENSG00000204969 | 22942087 | validated |
| mirTarbase | hsa-miR-181a-5p | PCDHA1   | 56147 | ENSG00000204970 | 22942087 | validated |
| mirTarbase | hsa-miR-106b-5p | ANKH     | 56172 | ENSG00000154122 | 23592263 | validated |
| mirTarbase | hsa-miR-181a-5p | MOSPD1   | 56180 | ENSG00000101928 | 22815788 | validated |
| mirTarbase | hsa-miR-15b-5p  | MTFR1L   | 56181 | ENSG00000117640 | 20371350 | validated |
| mirTarbase | hsa-miR-15b-5p  | FAM214A  | 56204 | ENSG00000047346 | 23622248 | validated |
| mirTarbase | hsa-miR-222-3p  | FAM214A  | 56204 | ENSG00000047346 | 22815788 | validated |
| mirTarbase | hsa-miR-296-5p  | SUSD2    | 56241 | ENSG00000099994 | 19536157 | validated |
| mirTarbase | hsa-miR-181a-5p | ZNF253   | 56242 | ENSG00000256771 | 23313552 | validated |
| mirTarbase | hsa-miR-15b-5p  | C21orf62 | 56245 | ENSG00000262938 | 27292025 | validated |
| mirTarbase | hsa-miR-222-3p  | YLPM1    | 56252 | ENSG00000119596 | 23622248 | validated |
| mirTarbase | hsa-miR-21-5p   | TMX4     | 56255 | ENSG00000125827 | 18591254 | validated |
| mirTarbase | hsa-miR-192-5p  | SERTAD4  | 56256 | ENSG00000082497 | 19074876 | validated |
| mirTarbase | hsa-miR-222-3p  | SERTAD4  | 56256 | ENSG00000082497 | 23622248 | validated |
| mirTarbase | hsa-miR-106b-5p | PARD3    | 56288 | ENSG00000148498 | 23313552 | validated |
| mirTarbase | hsa-miR-192-5p  | CTPS2    | 56474 | ENSG00000047230 | 19074876 | validated |
| mirTarbase | hsa-miR-144-3p  | KCNQ5    | 56479 | ENSG00000185760 | 19536157 | validated |
| mirTarbase | hsa-miR-15b-5p  | CYP26B1  | 56603 | ENSG00000003137 | 21572407 | validated |
| mirTarbase | hsa-miR-106b-5p | EIF5A2   | 56648 | ENSG00000163577 | 17242205 | validated |
| mirTarbase | hsa-miR-144-3p  | EIF5A2   | 56648 | ENSG00000163577 | 21572407 | validated |
| mirTarbase | hsa-miR-15b-5p  | POLE4    | 56655 | ENSG00000115350 | 22473208 | validated |
| mirTarbase | hsa-miR-106b-5p | TMEM9B   | 56674 | ENSG00000175348 | 22100165 | validated |
| mirTarbase | hsa-miR-106b-5p | NRIP3    | 56675 | ENSG00000175352 | 22100165 | validated |
| mirTarbase | hsa-miR-21-5p   | SAR1A    | 56681 | ENSG00000079332 | 18591254 | validated |
| mirTarbase | hsa-miR-18a-5p  | SAR1A    | 56681 | ENSG00000079332 | 21572407 | validated |
| mirTarbase | hsa-miR-582-5p  | CFAP298  | 56683 | ENSG00000159079 | 27292025 | validated |
| mirTarbase | hsa-miR-21-5p   | JPH1     | 56704 | ENSG00000104369 | 18591254 | validated |
| mirTarbase | hsa-miR-192-5p  | EMC7     | 56851 | ENSG00000134153 | 19074876 | validated |
| mirTarbase | hsa-miR-21-5p   | UGGT1    | 56886 | ENSG00000136731 | 18591254 | validated |
| mirTarbase | hsa-miR-21-5p   | TM9SF3   | 56889 | ENSG00000077147 | 19253296 | validated |
| mirTarbase | hsa-miR-181a-5p | TM9SF3   | 56889 | ENSG00000077147 | 20371350 | validated |
| mirTarbase | hsa-miR-15b-5p  | TM9SF3   | 56889 | ENSG00000077147 | 23622248 | validated |
| mirTarbase | hsa-miR-18a-5p  | UBQLN4   | 56893 | ENSG00000160803 | 23622248 | validated |

|            |                 |          |       |                 |          |           |
|------------|-----------------|----------|-------|-----------------|----------|-----------|
| mirtarbase | hsa-miR-21-5p   | BDH2     | 56898 | ENSG00000164039 | 20048743 | validated |
| mirtarbase | hsa-miR-505-3p  | C15orf39 | 56905 | ENSG00000167173 | 23622248 | validated |
| mirtarbase | hsa-miR-15b-5p  | C15orf39 | 56905 | ENSG00000167173 | 22473208 | validated |
| mirtarbase | hsa-miR-181a-5p | SPIRE1   | 56907 | ENSG00000134278 | 21572407 | validated |
| mirtarbase | hsa-miR-192-5p  | PAK6     | 56924 | ENSG00000137843 | 19074876 | validated |
| mirtarbase | hsa-miR-106b-5p | PAK6     | 56924 | ENSG00000137843 | 23824327 | validated |
| mirtarbase | hsa-miR-582-3p  | NCLN     | 56926 | ENSG00000125912 | 26701625 | validated |
| mirtarbase | hsa-miR-181a-5p | FEM1C    | 56929 | ENSG00000145780 | 20371350 | validated |
| mirtarbase | hsa-miR-106b-5p | FEM1C    | 56929 | ENSG00000145780 | 22473208 | validated |
| mirtarbase | hsa-miR-192-5p  | ARNTL2   | 56938 | ENSG00000029153 | 19074876 | validated |
| mirtarbase | hsa-miR-106b-5p | EMSY     | 56946 | ENSG00000158636 | 22473208 | validated |
| mirtarbase | hsa-miR-181a-5p | EMSY     | 56946 | ENSG00000158636 | 22473208 | validated |
| mirtarbase | hsa-miR-301a-3p | MFF      | 56947 | ENSG00000168958 | 21572407 | validated |
| mirtarbase | hsa-miR-15b-5p  | C5orf15  | 56951 | ENSG00000113583 | 23622248 | validated |
| mirtarbase | hsa-miR-192-5p  | NT5M     | 56953 | ENSG00000205309 | 19074876 | validated |
| mirtarbase | hsa-miR-222-3p  | ATXN7L3  | 56970 | ENSG00000087152 | 23622248 | validated |
| mirtarbase | hsa-miR-192-5p  | STOX2    | 56977 | ENSG00000173320 | 19074876 | validated |
| mirtarbase | hsa-miR-222-3p  | STOX2    | 56977 | ENSG00000173320 | 23622248 | validated |
| mirtarbase | hsa-miR-505-3p  | PRDM10   | 56980 | ENSG00000170325 | 23313552 | validated |
| mirtarbase | hsa-miR-106b-5p | BBX      | 56987 | ENSG00000114439 | 23592263 | validated |
| mirtarbase | hsa-miR-15b-5p  | CDC42SE2 | 56990 | ENSG00000158985 | 21572407 | validated |
| mirtarbase | hsa-miR-15b-5p  | KIF15    | 56992 | ENSG00000163808 | 19074876 | validated |
| mirtarbase | hsa-miR-192-5p  | CHPT1    | 56994 | ENSG00000111666 | 19074876 | validated |
| mirtarbase | hsa-miR-192-5p  | CTNNBIP1 | 56998 | ENSG00000178585 | 19074876 | validated |
| mirtarbase | hsa-miR-192-5p  | CCDC47   | 57003 | ENSG00000108588 | 19074876 | validated |
| mirtarbase | hsa-miR-106b-5p | CCDC47   | 57003 | ENSG00000108588 | 23622248 | validated |
| mirtarbase | hsa-miR-222-3p  | CCDC47   | 57003 | ENSG00000108588 | 23622248 | validated |
| mirtarbase | hsa-miR-15b-5p  | AKR1B10  | 57016 | ENSG00000198074 | 23446348 | validated |
| mirtarbase | hsa-miR-18a-5p  | CCNL1    | 57018 | ENSG00000163660 | 16331254 | validated |
| mirtarbase | hsa-miR-222-3p  | CIAPIN1  | 57019 | ENSG00000005194 | 23592263 | validated |
| mirtarbase | hsa-miR-106b-5p | RSRP1    | 57035 | ENSG00000117616 | 22473208 | validated |
| mirtarbase | hsa-miR-582-5p  | TBX20    | 57057 | ENSG00000164532 | 27292025 | validated |
| mirtarbase | hsa-miR-192-5p  | KNL1     | 57082 | ENSG00000137812 | 19074876 | validated |
| mirtarbase | hsa-miR-21-5p   | KNL1     | 57082 | ENSG00000137812 | 18591254 | validated |
| mirtarbase | hsa-miR-15b-5p  | PLSCR4   | 57088 | ENSG00000114698 | 23622248 | validated |
| mirtarbase | hsa-miR-192-5p  | ENTPD7   | 57089 | ENSG00000198018 | 19074876 | validated |
| mirtarbase | hsa-miR-15b-5p  | ENTPD7   | 57089 | ENSG00000198018 | 22473208 | validated |
| mirtarbase | hsa-miR-106b-5p | ENTPD7   | 57089 | ENSG00000198018 | 22473208 | validated |
| mirtarbase | hsa-miR-18a-5p  | PCNP     | 57092 | ENSG00000081154 | 20371350 | validated |
| mirtarbase | hsa-miR-296-5p  | PCNP     | 57092 | ENSG00000081154 | 27418678 | validated |
| mirtarbase | hsa-miR-21-5p   | PITHD1   | 57095 | ENSG00000057757 | 23592263 | validated |
| mirtarbase | hsa-miR-212-3p  | PARP11   | 57097 | ENSG00000111224 | 22012620 | validated |
| mirtarbase | hsa-miR-21-5p   | RTN4     | 57142 | ENSG00000115310 | 19253296 | validated |
| mirtarbase | hsa-miR-15b-5p  | RTN4     | 57142 | ENSG00000115310 | 21572407 | validated |
| mirtarbase | hsa-miR-15b-5p  | RALGAPB  | 57148 | ENSG00000170471 | 21572407 | validated |
| mirtarbase | hsa-miR-15b-5p  | SMURF1   | 57154 | ENSG00000198742 | 24435757 | validated |
| mirtarbase | hsa-miR-192-5p  | PHTF2    | 57157 | ENSG00000006576 | 19074876 | validated |
| mirtarbase | hsa-miR-106b-5p | PHTF2    | 57157 | ENSG00000006576 | 23446348 | validated |
| mirtarbase | hsa-miR-222-3p  | PELI2    | 57161 | ENSG00000139946 | 23622248 | validated |
| mirtarbase | hsa-miR-106b-5p | ZNF1     | 57169 | ENSG00000124201 | 22473208 | validated |
| mirtarbase | hsa-miR-106b-5p | KIAA1191 | 57179 | ENSG00000122203 | 22473208 | validated |
| mirtarbase | hsa-miR-301a-3p | KIAA1191 | 57179 | ENSG00000122203 | 24398324 | validated |
| mirtarbase | hsa-miR-15b-5p  | ACTR3B   | 57180 | ENSG00000133627 | 23592263 | validated |
| mirtarbase | hsa-miR-582-5p  | SLC39A10 | 57181 | ENSG00000196950 | 23446348 | validated |
| mirtarbase | hsa-miR-301a-3p | ANKRD50  | 57182 | ENSG00000151458 | 23592263 | validated |
| mirtarbase | hsa-miR-106b-5p | ANKRD50  | 57182 | ENSG00000151458 | 23592263 | validated |
| mirtarbase | hsa-miR-21-5p   | THOC2    | 57187 | ENSG00000125676 | 18591254 | validated |
| mirtarbase | hsa-miR-106b-5p | DENND11  | 57189 | ENSG00000262599 | 23446348 | validated |
| mirtarbase | hsa-miR-192-5p  | ATP10D   | 57205 | ENSG00000145246 | 16822819 | validated |
| mirtarbase | hsa-miR-192-5p  | ZNF248   | 57209 | ENSG00000198105 | 19074876 | validated |
| mirtarbase | hsa-miR-192-5p  | ADGRG6   | 57211 | ENSG00000112414 | 19074876 | validated |
| mirtarbase | hsa-miR-106b-5p | PPP4R3B  | 57223 | ENSG00000275052 | 23622248 | validated |
| mirtarbase | hsa-miR-192-5p  | NHSL1    | 57224 | ENSG00000135540 | 19074876 | validated |
| mirtarbase | hsa-miR-106b-5p | CBX8     | 57332 | ENSG00000141570 | 23824327 | validated |
| mirtarbase | hsa-miR-192-5p  | CLK4     | 57396 | ENSG00000113240 | 19074876 | validated |
| mirtarbase | hsa-miR-21-5p   | RAB22A   | 57403 | ENSG00000124209 | 18591254 | validated |
| mirtarbase | hsa-miR-106b-5p | RAB22A   | 57403 | ENSG00000124209 | 22473208 | validated |
| mirtarbase | hsa-miR-301a-3p | CYP20A1  | 57404 | ENSG00000119004 | 23824327 | validated |
| mirtarbase | hsa-miR-212-3p  | CYP20A1  | 57404 | ENSG00000119004 | 23824327 | validated |
| mirtarbase | hsa-miR-192-5p  | AS3MT    | 57412 | ENSG00000214435 | 23824327 | validated |
| mirtarbase | hsa-miR-18a-5p  | AS3MT    | 57412 | ENSG00000214435 | 23824327 | validated |

|            |                 |           |       |                 |          |           |
|------------|-----------------|-----------|-------|-----------------|----------|-----------|
| mirtarbase | hsa-miR-15b-5p  | REXO1     | 57455 | ENSG00000079313 | 22473208 | validated |
| mirtarbase | hsa-miR-192-5p  | KIAA1143  | 57456 | ENSG00000163807 | 19074876 | validated |
| mirtarbase | hsa-miR-181a-5p | GATAD2B   | 57459 | ENSG00000261992 | 20371350 | validated |
| mirtarbase | hsa-miR-222-3p  | PPM1H     | 57460 | ENSG00000111110 | 23622248 | validated |
| mirtarbase | hsa-miR-106b-5p | ISY1      | 57461 | ENSG00000240682 | 27292025 | validated |
| mirtarbase | hsa-miR-106b-5p | CNOT6     | 57472 | ENSG00000113300 | 23622248 | validated |
| mirtarbase | hsa-miR-582-5p  | ZNF490    | 57474 | ENSG00000188033 | 21572407 | validated |
| mirtarbase | hsa-miR-15b-5p  | USP31     | 57478 | ENSG00000103404 | 22473208 | validated |
| mirtarbase | hsa-miR-144-3p  | NLN       | 57486 | ENSG00000123213 | 23592263 | validated |
| mirtarbase | hsa-miR-21-5p   | ESYT2     | 57488 | ENSG00000117868 | 18591254 | validated |
| mirtarbase | hsa-miR-15b-5p  | ODF2L     | 57489 | ENSG00000122417 | 24398324 | validated |
| mirtarbase | hsa-miR-18a-5p  | AHRR      | 57491 | ENSG00000286169 | 23622248 | validated |
| mirtarbase | hsa-miR-144-3p  | ARID1B    | 57492 | ENSG00000049618 | 23446348 | validated |
| mirtarbase | hsa-miR-192-5p  | MRTFB     | 57496 | ENSG00000186260 | 19074876 | validated |
| mirtarbase | hsa-miR-192-5p  | KIDINS220 | 57498 | ENSG00000134313 | 16822819 | validated |
| mirtarbase | hsa-miR-106b-5p | MAVS      | 57506 | ENSG00000088888 | 21572407 | validated |
| mirtarbase | hsa-miR-301a-3p | MAVS      | 57506 | ENSG00000088888 | 21572407 | validated |
| mirtarbase | hsa-miR-181a-5p | MTUS1     | 57509 | ENSG00000129422 | 22473208 | validated |
| mirtarbase | hsa-miR-222-3p  | CASKIN2   | 57513 | ENSG00000177303 | 23622248 | validated |
| mirtarbase | hsa-miR-106b-5p | SERINC1   | 57515 | ENSG00000111897 | 23313552 | validated |
| mirtarbase | hsa-miR-181a-5p | HECW2     | 57520 | ENSG00000138411 | 22473208 | validated |
| mirtarbase | hsa-miR-181a-5p | SRGAP1    | 57522 | ENSG00000196935 | 22815788 | validated |
| mirtarbase | hsa-miR-15b-5p  | CASKIN1   | 57524 | ENSG00000167971 | 23592263 | validated |
| mirtarbase | hsa-miR-21-5p   | NUFIP2    | 57532 | ENSG00000108256 | 20371350 | validated |
| mirtarbase | hsa-miR-106b-5p | NUFIP2    | 57532 | ENSG00000108256 | 23446348 | validated |
| mirtarbase | hsa-miR-15b-5p  | NUFIP2    | 57532 | ENSG00000108256 | 22473208 | validated |
| mirtarbase | hsa-miR-582-5p  | NUFIP2    | 57532 | ENSG00000108256 | 20371350 | validated |
| mirtarbase | hsa-miR-15b-5p  | TBC1D14   | 57533 | ENSG00000132405 | 22473208 | validated |
| mirtarbase | hsa-miR-192-5p  | MIB1      | 57534 | ENSG00000101752 | 19074876 | validated |
| mirtarbase | hsa-miR-21-5p   | MIB1      | 57534 | ENSG00000101752 | 18591254 | validated |
| mirtarbase | hsa-miR-15b-5p  | MIB1      | 57534 | ENSG00000101752 | 22473208 | validated |
| mirtarbase | hsa-miR-106b-5p | SORCS2    | 57537 | ENSG00000184985 | 22100165 | validated |
| mirtarbase | hsa-miR-326     | SORCS2    | 57537 | ENSG00000184985 | 22012620 | validated |
| mirtarbase | hsa-miR-181a-5p | KLHL42    | 57542 | ENSG00000087448 | 20371350 | validated |
| mirtarbase | hsa-miR-192-5p  | KLHL42    | 57542 | ENSG00000087448 | 19074876 | validated |
| mirtarbase | hsa-miR-21-5p   | KLHL42    | 57542 | ENSG00000087448 | 18591254 | validated |
| mirtarbase | hsa-miR-301a-3p | PDP2      | 57546 | ENSG00000172840 | 23824327 | validated |
| mirtarbase | hsa-miR-144-3p  | TAOK1     | 57551 | ENSG00000160551 | 23592263 | validated |
| mirtarbase | hsa-miR-15b-5p  | TAOK1     | 57551 | ENSG00000160551 | 21572407 | validated |
| mirtarbase | hsa-miR-18a-5p  | TAOK1     | 57551 | ENSG00000160551 | 23592263 | validated |
| mirtarbase | hsa-miR-301a-3p | TAOK1     | 57551 | ENSG00000160551 | 23592263 | validated |
| mirtarbase | hsa-miR-192-5p  | NCEH1     | 57552 | ENSG00000144959 | 19074876 | validated |
| mirtarbase | hsa-miR-192-5p  | STAMBPL1  | 57559 | ENSG00000138134 | 19074876 | validated |
| mirtarbase | hsa-miR-181a-5p | ARRDC3    | 57561 | ENSG00000113369 | 22473208 | validated |
| mirtarbase | hsa-miR-192-5p  | KLHL8     | 57563 | ENSG00000145332 | 19074876 | validated |
| mirtarbase | hsa-miR-222-3p  | KLHL8     | 57563 | ENSG00000145332 | 26701625 | validated |
| mirtarbase | hsa-miR-222-3p  | TRMT5     | 57570 | ENSG00000126814 | 23622248 | validated |
| mirtarbase | hsa-miR-106b-5p | MARCF4    | 57574 | ENSG00000144583 | 22100165 | validated |
| mirtarbase | hsa-miR-21-5p   | ARHGAP21  | 57584 | ENSG00000107863 | 18591254 | validated |
| mirtarbase | hsa-miR-582-5p  | USP36     | 57602 | ENSG00000055483 | 23592263 | validated |
| mirtarbase | hsa-miR-15b-5p  | TRMT9B    | 57604 | ENSG00000250305 | 20371350 | validated |
| mirtarbase | hsa-miR-15b-5p  | KIAA1456  | 57604 | ENSG00000284872 | 20371350 | validated |
| mirtarbase | hsa-miR-582-5p  | TRMT9B    | 57604 | ENSG00000250305 | 26701625 | validated |
| mirtarbase | hsa-miR-582-5p  | KIAA1456  | 57604 | ENSG00000284872 | 26701625 | validated |
| mirtarbase | hsa-miR-21-5p   | SLAIN2    | 57606 | ENSG00000109171 | 18591254 | validated |
| mirtarbase | hsa-miR-106b-5p | SLAIN2    | 57606 | ENSG00000109171 | 22473208 | validated |
| mirtarbase | hsa-miR-181a-5p | JCAD      | 57608 | ENSG00000165757 | 20371350 | validated |
| mirtarbase | hsa-miR-582-5p  | JCAD      | 57608 | ENSG00000165757 | 21572407 | validated |
| mirtarbase | hsa-miR-144-3p  | JCAD      | 57608 | ENSG00000165757 | 21572407 | validated |
| mirtarbase | hsa-miR-15b-5p  | RANBP10   | 57610 | ENSG00000141084 | 23622248 | validated |
| mirtarbase | hsa-miR-222-3p  | RANBP10   | 57610 | ENSG00000141084 | 23622248 | validated |
| mirtarbase | hsa-miR-21-5p   | TSHZ3     | 57616 | ENSG00000121297 | 18591254 | validated |
| mirtarbase | hsa-miR-18a-5p  | VPS18     | 57617 | ENSG00000104142 | 23824327 | validated |
| mirtarbase | hsa-miR-18a-5p  | POGK      | 57645 | ENSG00000143157 | 20371350 | validated |
| mirtarbase | hsa-miR-181a-5p | USP28     | 57646 | ENSG00000048028 | 17612493 | validated |
| mirtarbase | hsa-miR-106b-5p | USP28     | 57646 | ENSG00000048028 | 22473208 | validated |
| mirtarbase | hsa-miR-15b-5p  | DHX37     | 57647 | ENSG00000150990 | 23622248 | validated |
| mirtarbase | hsa-miR-301a-3p | PHF12     | 57649 | ENSG00000109118 | 23446348 | validated |
| mirtarbase | hsa-miR-192-5p  | PHF12     | 57649 | ENSG00000109118 | 19536157 | validated |
| mirtarbase | hsa-miR-15b-5p  | UVSSA     | 57654 | ENSG00000163945 | 23622248 | validated |
| mirtarbase | hsa-miR-106b-5p | GRAMD1A   | 57655 | ENSG00000089351 | 22473208 | validated |

|            |                 |          |       |                 |          |           |
|------------|-----------------|----------|-------|-----------------|----------|-----------|
| mirTarbase | hsa-miR-192-5p  | HCN3     | 57657 | ENSG00000263324 | 19074876 | validated |
| mirTarbase | hsa-miR-106b-5p | ZBTB4    | 57659 | ENSG00000174282 | 22752225 | validated |
| mirTarbase | hsa-miR-301a-3p | ZBTB4    | 57659 | ENSG00000174282 | 24398324 | validated |
| mirTarbase | hsa-miR-181a-5p | ZBTB4    | 57659 | ENSG00000174282 | 22473208 | validated |
| mirTarbase | hsa-miR-222-3p  | PHRF1    | 57661 | ENSG00000274780 | 23622248 | validated |
| mirTarbase | hsa-miR-582-5p  | RNF213   | 57674 | ENSG00000173821 | 23824327 | validated |
| mirTarbase | hsa-miR-21-5p   | GPAM     | 57678 | ENSG00000119927 | 18591254 | validated |
| mirTarbase | hsa-miR-106b-5p | GPAM     | 57678 | ENSG00000119927 | 22473208 | validated |
| mirTarbase | hsa-miR-18a-5p  | ZSWIM6   | 57688 | ENSG00000130449 | 23622248 | validated |
| mirTarbase | hsa-miR-212-3p  | TNRC6C   | 57690 | ENSG00000078687 | 19536157 | validated |
| mirTarbase | hsa-miR-505-3p  | TNRC6C   | 57690 | ENSG00000078687 | 23824327 | validated |
| mirTarbase | hsa-miR-301a-3p | ZNF317   | 57693 | ENSG00000130803 | 23446348 | validated |
| mirTarbase | hsa-miR-21-5p   | DDX55    | 57696 | ENSG00000111364 | 23446348 | validated |
| mirTarbase | hsa-miR-192-5p  | FANCM    | 57697 | ENSG00000187790 | 19074876 | validated |
| mirTarbase | hsa-miR-106b-5p | SHTN1    | 57698 | ENSG00000187164 | 17242205 | validated |
| mirTarbase | hsa-miR-505-3p  | FAM160B1 | 57700 | ENSG00000151553 | 21572407 | validated |
| mirTarbase | hsa-miR-106b-5p | FAM160B1 | 57700 | ENSG00000151553 | 23592263 | validated |
| mirTarbase | hsa-miR-582-3p  | FAM160B1 | 57700 | ENSG00000151553 | 21572407 | validated |
| mirTarbase | hsa-miR-222-3p  | NCKAP5L  | 57701 | ENSG00000167566 | 23622248 | validated |
| mirTarbase | hsa-miR-192-5p  | DENND1A  | 57706 | ENSG00000119522 | 19074876 | validated |
| mirTarbase | hsa-miR-181a-5p | MEAK7    | 57707 | ENSG00000140950 | 23824327 | validated |
| mirTarbase | hsa-miR-301a-3p | ZNF529   | 57711 | ENSG00000186020 | 23313552 | validated |
| mirTarbase | hsa-miR-222-3p  | GPR107   | 57720 | ENSG00000148358 | 26701625 | validated |
| mirTarbase | hsa-miR-192-5p  | IGDCC4   | 57722 | ENSG00000103742 | 19074876 | validated |
| mirTarbase | hsa-miR-326     | EPG5     | 57724 | ENSG00000152223 | 23313552 | validated |
| mirTarbase | hsa-miR-192-5p  | ZFYVE28  | 57732 | ENSG00000159733 | 19074876 | validated |
| mirTarbase | hsa-miR-192-5p  | TRIB3    | 57761 | ENSG00000101255 | 19074876 | validated |
| mirTarbase | hsa-miR-106b-5p | SUGP1    | 57794 | ENSG00000105705 | 23313552 | validated |
| mirTarbase | hsa-miR-192-5p  | GATAD1   | 57798 | ENSG00000157259 | 19074876 | validated |
| mirTarbase | hsa-miR-106b-5p | GATAD1   | 57798 | ENSG00000157259 | 23824327 | validated |
| mirTarbase | hsa-miR-106b-5p | RAP2C    | 57826 | ENSG00000123728 | 21572407 | validated |
| mirTarbase | hsa-miR-582-5p  | RAP2C    | 57826 | ENSG00000123728 | 21572407 | validated |
| mirTarbase | hsa-miR-144-3p  | RAP2C    | 57826 | ENSG00000123728 | 21572407 | validated |
| mirTarbase | hsa-miR-15b-5p  | RAP2C    | 57826 | ENSG00000123728 | 22473208 | validated |
| mirTarbase | hsa-miR-192-5p  | PTBP2    | 58155 | ENSG00000117569 | 19074876 | validated |
| mirTarbase | hsa-miR-15b-5p  | SRPRB    | 58477 | ENSG00000144867 | 22473208 | validated |
| mirTarbase | hsa-miR-15b-5p  | TRAPPC1  | 58485 | ENSG00000170043 | 23622248 | validated |
| mirTarbase | hsa-miR-18a-5p  | TRAPPC1  | 58485 | ENSG00000170043 | 23622248 | validated |
| mirTarbase | hsa-miR-192-5p  | CREBZF   | 58487 | ENSG00000137504 | 19074876 | validated |
| mirTarbase | hsa-miR-106b-5p | ABHD17C  | 58489 | ENSG00000136379 | 23622248 | validated |
| mirTarbase | hsa-miR-15b-5p  | RPRD1B   | 58490 | ENSG00000101413 | 26701625 | validated |
| mirTarbase | hsa-miR-192-5p  | INIP     | 58493 | ENSG00000148153 | 19074876 | validated |
| mirTarbase | hsa-miR-106b-5p | LY6G5B   | 58496 | ENSG00000239497 | 23313552 | validated |
| mirTarbase | hsa-miR-15b-5p  | KMT2C    | 58508 | ENSG00000055609 | 23622248 | validated |
| mirTarbase | hsa-miR-15b-5p  | DLGAP3   | 58512 | ENSG00000116544 | 20371350 | validated |
| mirTarbase | hsa-miR-106b-5p | EPS15L1  | 58513 | ENSG00000127527 | 23446348 | validated |
| mirTarbase | hsa-miR-181a-5p | RBM25    | 58517 | ENSG00000119707 | 23824327 | validated |
| mirTarbase | hsa-miR-301a-3p | MID1IP1  | 58526 | ENSG00000165175 | 24398324 | validated |
| mirTarbase | hsa-miR-106b-5p | RRAGD    | 58528 | ENSG00000025039 | 23446348 | validated |
| mirTarbase | hsa-miR-301a-3p | RRAGD    | 58528 | ENSG00000025039 | 23446348 | validated |
| mirTarbase | hsa-miR-106b-5p | ENPP5    | 59084 | ENSG00000112796 | 21572407 | validated |
| mirTarbase | hsa-miR-301a-3p | ENPP5    | 59084 | ENSG00000112796 | 21572407 | validated |
| mirTarbase | hsa-miR-18a-5p  | UBL5     | 59286 | ENSG00000198258 | 20371350 | validated |
| mirTarbase | hsa-miR-21-5p   | PLEKHA1  | 59338 | ENSG00000107679 | 18591254 | validated |
| mirTarbase | hsa-miR-15b-5p  | PLEKHA1  | 59338 | ENSG00000107679 | 21572407 | validated |
| mirTarbase | hsa-miR-21-5p   | PLEKHA2  | 59339 | ENSG00000169499 | 22100165 | validated |
| mirTarbase | hsa-miR-296-5p  | PLEKHA2  | 59339 | ENSG00000169499 | 23824327 | validated |
| mirTarbase | hsa-miR-21-5p   | GNB4     | 59345 | ENSG00000114450 | 20371350 | validated |
| mirTarbase | hsa-miR-181a-5p | ZNF350   | 59348 | ENSG00000256683 | 20371350 | validated |
| mirTarbase | hsa-miR-582-5p  | ZNF350   | 59348 | ENSG00000256683 | 20371350 | validated |
| mirTarbase | hsa-miR-144-3p  | ZNF350   | 59348 | ENSG00000256683 | 20371350 | validated |
| mirTarbase | hsa-miR-181a-5p | TGIF2    | 60436 | ENSG00000118707 | 20371350 | validated |
| mirTarbase | hsa-miR-192-5p  | ELOVL5   | 60481 | ENSG00000012660 | 19074876 | validated |
| mirTarbase | hsa-miR-192-5p  | AASDHPT  | 60496 | ENSG00000149313 | 19074876 | validated |
| mirTarbase | hsa-miR-21-5p   | LDAH     | 60526 | ENSG00000118961 | 18591254 | validated |
| mirTarbase | hsa-miR-192-5p  | SPCS3    | 60559 | ENSG00000129128 | 19074876 | validated |
| mirTarbase | hsa-miR-21-5p   | GAS5     | 60674 | ENSG00000234741 | 23933812 | validated |
| mirTarbase | hsa-miR-222-3p  | GAS5     | 60674 | ENSG00000234741 | 26446789 | validated |
| mirTarbase | hsa-miR-181a-5p | FKBP10   | 60681 | ENSG00000141756 | 17612493 | validated |
| mirTarbase | hsa-miR-106b-5p | SLC22A23 | 63027 | ENSG00000137266 | 23592263 | validated |
| mirTarbase | hsa-miR-192-5p  | BCORL1   | 63035 | ENSG00000085185 | 19074876 | validated |

|            |                 |          |       |                 |          |           |
|------------|-----------------|----------|-------|-----------------|----------|-----------|
| mirtarbase | hsa-miR-505-3p  | THADA    | 63892 | ENSG00000115970 | 23622248 | validated |
| mirtarbase | hsa-miR-106b-5p | THADA    | 63892 | ENSG00000115970 | 23622248 | validated |
| mirtarbase | hsa-miR-505-3p  | UBE2O    | 63893 | ENSG00000175931 | 23622248 | validated |
| mirtarbase | hsa-miR-181a-5p | XPNPEP3  | 63929 | ENSG00000196236 | 22012620 | validated |
| mirtarbase | hsa-miR-181a-5p | MRPS14   | 63931 | ENSG00000120333 | 17612493 | validated |
| mirtarbase | hsa-miR-21-5p   | ZNF667   | 63934 | ENSG00000198046 | 18591254 | validated |
| mirtarbase | hsa-miR-181a-5p | ZNF667   | 63934 | ENSG00000198046 | 24398324 | validated |
| mirtarbase | hsa-miR-21-5p   | FAM217B  | 63939 | ENSG00000196227 | 18591254 | validated |
| mirtarbase | hsa-miR-144-3p  | FAM217B  | 63939 | ENSG00000196227 | 23592263 | validated |
| mirtarbase | hsa-miR-301a-3p | FAM217B  | 63939 | ENSG00000196227 | 23824327 | validated |
| mirtarbase | hsa-miR-192-5p  | CLSPN    | 63967 | ENSG00000092853 | 19074876 | validated |
| mirtarbase | hsa-miR-15b-5p  | CLSPN    | 63967 | ENSG00000092853 | 21572407 | validated |
| mirtarbase | hsa-miR-301a-3p | KIF13A   | 63971 | ENSG00000137177 | 23592263 | validated |
| mirtarbase | hsa-miR-212-3p  | PRDM15   | 63977 | ENSG00000141956 | 22291592 | validated |
| mirtarbase | hsa-miR-192-5p  | PERP     | 64065 | ENSG00000112378 | 16822819 | validated |
| mirtarbase | hsa-miR-15b-5p  | SNX16    | 64089 | ENSG00000104497 | 23446348 | validated |
| mirtarbase | hsa-miR-106b-5p | SMOC1    | 64093 | ENSG00000198732 | 21572407 | validated |
| mirtarbase | hsa-miR-301a-3p | SMOC1    | 64093 | ENSG00000198732 | 21572407 | validated |
| mirtarbase | hsa-miR-192-5p  | CENPK    | 64105 | ENSG00000123219 | 19074876 | validated |
| mirtarbase | hsa-miR-192-5p  | MOAP1    | 64112 | ENSG00000278268 | 19074876 | validated |
| mirtarbase | hsa-miR-21-5p   | MOAP1    | 64112 | ENSG00000278268 | 18591254 | validated |
| mirtarbase | hsa-miR-15b-5p  | VSIR     | 64115 | ENSG00000107738 | 23592263 | validated |
| mirtarbase | hsa-miR-192-5p  | SLC39A8  | 64116 | ENSG00000138821 | 19074876 | validated |
| mirtarbase | hsa-miR-21-5p   | RRAGC    | 64121 | ENSG00000116954 | 18591254 | validated |
| mirtarbase | hsa-miR-192-5p  | NOD2     | 64127 | ENSG00000167207 | 19074876 | validated |
| mirtarbase | hsa-miR-106b-5p | LIN7B    | 64130 | ENSG00000104863 | 17242205 | validated |
| mirtarbase | hsa-miR-18a-5p  | XYLT2    | 64132 | ENSG00000015532 | 20371350 | validated |
| mirtarbase | hsa-miR-15b-5p  | IFIH1    | 64135 | ENSG00000115267 | 23622248 | validated |
| mirtarbase | hsa-miR-222-3p  | RBSN     | 64145 | ENSG00000131381 | 23622248 | validated |
| mirtarbase | hsa-miR-106b-5p | C17orf75 | 64149 | ENSG00000108666 | 27418678 | validated |
| mirtarbase | hsa-miR-21-5p   | NCAPG    | 64151 | ENSG00000109805 | 19253296 | validated |
| mirtarbase | hsa-miR-181a-5p | NCAPG    | 64151 | ENSG00000109805 | 22473208 | validated |
| mirtarbase | hsa-miR-192-5p  | TOR3A    | 64222 | ENSG00000186283 | 19074876 | validated |
| mirtarbase | hsa-miR-21-5p   | HERPUD2  | 64224 | ENSG00000122557 | 18591254 | validated |
| mirtarbase | hsa-miR-106b-5p | ABCG8    | 64241 | ENSG00000143921 | 23313552 | validated |
| mirtarbase | hsa-miR-301a-3p | ABCG8    | 64241 | ENSG00000143921 | 27292025 | validated |
| mirtarbase | hsa-miR-192-5p  | TENT4B   | 64282 | ENSG00000121274 | 19074876 | validated |
| mirtarbase | hsa-miR-181a-5p | TENT4B   | 64282 | ENSG00000121274 | 22473208 | validated |
| mirtarbase | hsa-miR-106b-5p | TENT4B   | 64282 | ENSG00000121274 | 23313552 | validated |
| mirtarbase | hsa-miR-15b-5p  | COP1     | 64326 | ENSG00000143207 | 22473208 | validated |
| mirtarbase | hsa-miR-21-5p   | LMBR1    | 64327 | ENSG00000105983 | 18591254 | validated |
| mirtarbase | hsa-miR-192-5p  | NFKBIZ   | 64332 | ENSG00000144802 | 19074876 | validated |
| mirtarbase | hsa-miR-296-5p  | NXN      | 64359 | ENSG00000280563 | 23592263 | validated |
| mirtarbase | hsa-miR-192-5p  | ZMAT3    | 64393 | ENSG00000172667 | 19074876 | validated |
| mirtarbase | hsa-miR-301a-3p | ZMAT3    | 64393 | ENSG00000172667 | 24398324 | validated |
| mirtarbase | hsa-miR-15b-5p  | ZMAT3    | 64393 | ENSG00000172667 | 24398324 | validated |
| mirtarbase | hsa-miR-106b-5p | ZMAT3    | 64393 | ENSG00000172667 | 23313552 | validated |
| mirtarbase | hsa-miR-192-5p  | MPP5     | 64398 | ENSG00000072415 | 19074876 | validated |
| mirtarbase | hsa-miR-21-5p   | MPP5     | 64398 | ENSG00000072415 | 18591254 | validated |
| mirtarbase | hsa-miR-181a-5p | MPP5     | 64398 | ENSG00000072415 | 22473208 | validated |
| mirtarbase | hsa-miR-106b-5p | AKTIP    | 64400 | ENSG00000166971 | 22473208 | validated |
| mirtarbase | hsa-miR-106b-5p | TMEM267  | 64417 | ENSG00000151881 | 22473208 | validated |
| mirtarbase | hsa-miR-301a-3p | NOM1     | 64434 | ENSG00000146909 | 23824327 | validated |
| mirtarbase | hsa-miR-181a-5p | GIGYF1   | 64599 | ENSG00000146830 | 20371350 | validated |
| mirtarbase | hsa-miR-18a-5p  | GIGYF1   | 64599 | ENSG00000146830 | 20371350 | validated |
| mirtarbase | hsa-miR-106b-5p | GIGYF1   | 64599 | ENSG00000146830 | 22473208 | validated |
| mirtarbase | hsa-miR-296-5p  | GIGYF1   | 64599 | ENSG00000146830 | 19536157 | validated |
| mirtarbase | hsa-miR-18a-5p  | PLA2G2F  | 64600 | ENSG00000158786 | 23592263 | validated |
| mirtarbase | hsa-miR-296-5p  | COPS7B   | 64708 | ENSG00000144524 | 23592263 | validated |
| mirtarbase | hsa-miR-192-5p  | NUCKS1   | 64710 | ENSG00000069275 | 19074876 | validated |
| mirtarbase | hsa-miR-505-3p  | NUCKS1   | 64710 | ENSG00000069275 | 23622248 | validated |
| mirtarbase | hsa-miR-301a-3p | NUCKS1   | 64710 | ENSG00000069275 | 23622248 | validated |
| mirtarbase | hsa-miR-15b-5p  | NUCKS1   | 64710 | ENSG00000069275 | 22473208 | validated |
| mirtarbase | hsa-miR-15b-5p  | WDR13    | 64743 | ENSG00000101940 | 26701625 | validated |
| mirtarbase | hsa-miR-15b-5p  | C16orf58 | 64755 | ENSG00000140688 | 26701625 | validated |
| mirtarbase | hsa-miR-21-5p   | TNS3     | 64759 | ENSG00000136205 | 18591254 | validated |
| mirtarbase | hsa-miR-15b-5p  | IPPK     | 64768 | ENSG00000127080 | 23592263 | validated |
| mirtarbase | hsa-miR-192-5p  | CCDC14   | 64770 | ENSG00000175455 | 19074876 | validated |
| mirtarbase | hsa-miR-21-5p   | CCDC14   | 64770 | ENSG00000175455 | 18591254 | validated |
| mirtarbase | hsa-miR-212-3p  | ILRUN    | 64771 | ENSG00000196821 | 23592263 | validated |
| mirtarbase | hsa-miR-15b-5p  | ILRUN    | 64771 | ENSG00000196821 | 22473208 | validated |

|            |                 |         |       |                 |          |           |
|------------|-----------------|---------|-------|-----------------|----------|-----------|
| mirTarbase | hsa-miR-192-5p  | FNDC3B  | 64778 | ENSG00000075420 | 19074876 | validated |
| mirTarbase | hsa-miR-181a-5p | FNDC3B  | 64778 | ENSG00000075420 | 22473208 | validated |
| mirTarbase | hsa-miR-144-3p  | CERK    | 64781 | ENSG00000100422 | 23592263 | validated |
| mirTarbase | hsa-miR-106b-5p | CRTC3   | 64784 | ENSG00000140577 | 22473208 | validated |
| mirTarbase | hsa-miR-222-3p  | EXO5    | 64789 | ENSG00000164002 | 22012620 | validated |
| mirTarbase | hsa-miR-106b-5p | EXO5    | 64789 | ENSG00000164002 | 22012620 | validated |
| mirTarbase | hsa-miR-21-5p   | RMND5A  | 64795 | ENSG00000153561 | 18591254 | validated |
| mirTarbase | hsa-miR-192-5p  | ELOVL1  | 64834 | ENSG00000066322 | 19074876 | validated |
| mirTarbase | hsa-miR-15b-5p  | KLC2    | 64837 | ENSG00000174996 | 22473208 | validated |
| mirTarbase | hsa-miR-21-5p   | FBXL17  | 64839 | ENSG00000145743 | 18591254 | validated |
| mirTarbase | hsa-miR-505-3p  | YTHDC2  | 64848 | ENSG00000047188 | 23622248 | validated |
| mirTarbase | hsa-miR-18a-5p  | TUT1    | 64852 | ENSG00000149016 | 23622248 | validated |
| mirTarbase | hsa-miR-106b-5p | USP46   | 64854 | ENSG00000109189 | 17242205 | validated |
| mirTarbase | hsa-miR-192-5p  | PLEKHG2 | 64857 | ENSG00000090924 | 19074876 | validated |
| mirTarbase | hsa-miR-106b-5p | NABP1   | 64859 | ENSG00000173559 | 22473208 | validated |
| mirTarbase | hsa-miR-301a-3p | NABP1   | 64859 | ENSG00000173559 | 23446348 | validated |
| mirTarbase | hsa-miR-301a-3p | RFX7    | 64864 | ENSG00000181827 | 22012620 | validated |
| mirTarbase | hsa-miR-326     | BCL11B  | 64919 | ENSG00000127152 | 22291592 | validated |
| mirTarbase | hsa-miR-582-5p  | SLC30A5 | 64924 | ENSG00000145740 | 23446348 | validated |
| mirTarbase | hsa-miR-15b-5p  | MRPS11  | 64963 | ENSG00000181991 | 23622248 | validated |
| mirTarbase | hsa-miR-15b-5p  | MRPL40  | 64976 | ENSG00000185608 | 22473208 | validated |
| mirTarbase | hsa-miR-181a-5p | MRPL34  | 64981 | ENSG00000130312 | 21572407 | validated |
| mirTarbase | hsa-miR-192-5p  | REEP1   | 65055 | ENSG00000068615 | 19074876 | validated |
| mirTarbase | hsa-miR-21-5p   | RAPH1   | 65059 | ENSG00000173166 | 18591254 | validated |
| mirTarbase | hsa-miR-15b-5p  | RAPH1   | 65059 | ENSG00000173166 | 20371350 | validated |
| mirTarbase | hsa-miR-15b-5p  | TMEM135 | 65084 | ENSG00000166575 | 22473208 | validated |
| mirTarbase | hsa-miR-212-3p  | PRAMEF1 | 65121 | ENSG00000116721 | 20371350 | validated |
| mirTarbase | hsa-miR-192-5p  | SOWAHC  | 65124 | ENSG00000198142 | 19074876 | validated |
| mirTarbase | hsa-miR-21-5p   | SOWAHC  | 65124 | ENSG00000198142 | 18591254 | validated |
| mirTarbase | hsa-miR-15b-5p  | SOWAHC  | 65124 | ENSG00000198142 | 21572407 | validated |
| mirTarbase | hsa-miR-21-5p   | WNK1    | 65125 | ENSG00000060237 | 18591254 | validated |
| mirTarbase | hsa-miR-144-3p  | WNK1    | 65125 | ENSG00000060237 | 20371350 | validated |
| mirTarbase | hsa-miR-181a-5p | ZFP69B  | 65243 | ENSG00000187801 | 23446348 | validated |
| mirTarbase | hsa-miR-106b-5p | MPPE1   | 65258 | ENSG00000154889 | 27418678 | validated |
| mirTarbase | hsa-miR-222-3p  | C8orf33 | 65265 | ENSG00000182307 | 23622248 | validated |
| mirTarbase | hsa-miR-296-5p  | WNK4    | 65266 | ENSG00000126562 | 20561597 | validated |
| mirTarbase | hsa-miR-21-5p   | WNK3    | 65267 | ENSG00000196632 | 21544242 | validated |
| mirTarbase | hsa-miR-106b-5p | WNK3    | 65267 | ENSG00000196632 | 22100165 | validated |
| mirTarbase | hsa-miR-301a-3p | WNK3    | 65267 | ENSG00000196632 | 22100165 | validated |
| mirTarbase | hsa-miR-15b-5p  | WNK3    | 65267 | ENSG00000196632 | 20371350 | validated |
| mirTarbase | hsa-miR-144-3p  | PLEKHA3 | 65977 | ENSG00000116095 | 21572407 | validated |
| mirTarbase | hsa-miR-181a-5p | PHACTR4 | 65979 | ENSG00000204138 | 22815788 | validated |
| mirTarbase | hsa-miR-222-3p  | PHACTR4 | 65979 | ENSG00000204138 | 22815788 | validated |
| mirTarbase | hsa-miR-106b-5p | CAPRIN2 | 65981 | ENSG00000110888 | 22473208 | validated |
| mirTarbase | hsa-miR-582-5p  | CAPRIN2 | 65981 | ENSG00000110888 | 23592263 | validated |
| mirTarbase | hsa-miR-301a-3p | CAPRIN2 | 65981 | ENSG00000110888 | 23592263 | validated |
| mirTarbase | hsa-miR-181a-5p | CAPRIN2 | 65981 | ENSG00000110888 | 23592263 | validated |
| mirTarbase | hsa-miR-15b-5p  | GRAMD2B | 65983 | ENSG00000155324 | 22473208 | validated |
| mirTarbase | hsa-miR-192-5p  | ZBTB10  | 65986 | ENSG00000205189 | 19074876 | validated |
| mirTarbase | hsa-miR-15b-5p  | ZBTB10  | 65986 | ENSG00000205189 | 21572407 | validated |
| mirTarbase | hsa-miR-21-5p   | MTMR9   | 66036 | ENSG00000104643 | 18591254 | validated |
| mirTarbase | hsa-miR-106b-5p | MTMR9   | 66036 | ENSG00000104643 | 22927820 | validated |
| mirTarbase | hsa-miR-192-5p  | MTMR9   | 66036 | ENSG00000104643 | 27292025 | validated |
| mirTarbase | hsa-miR-192-5p  | OTUB2   | 78990 | ENSG00000277276 | 19074876 | validated |
| mirTarbase | hsa-miR-326     | VKORC1  | 79001 | ENSG00000167397 | 23622248 | validated |
| mirTarbase | hsa-miR-192-5p  | MIS12   | 79003 | ENSG00000167842 | 19074876 | validated |
| mirTarbase | hsa-miR-192-5p  | DDX50   | 79009 | ENSG00000107625 | 19074876 | validated |
| mirTarbase | hsa-miR-21-5p   | GID4    | 79018 | ENSG00000141034 | 18591254 | validated |
| mirTarbase | hsa-miR-106b-5p | GID4    | 79018 | ENSG00000141034 | 22473208 | validated |
| mirTarbase | hsa-miR-505-3p  | GID4    | 79018 | ENSG00000141034 | 20371350 | validated |
| mirTarbase | hsa-miR-212-3p  | GID4    | 79018 | ENSG00000141034 | 23313552 | validated |
| mirTarbase | hsa-miR-106b-5p | CENPM   | 79019 | ENSG00000100162 | 23622248 | validated |
| mirTarbase | hsa-miR-505-3p  | NABP2   | 79035 | ENSG00000139579 | 23622248 | validated |
| mirTarbase | hsa-miR-106b-5p | ZFYVE21 | 79038 | ENSG00000100711 | 23592263 | validated |
| mirTarbase | hsa-miR-192-5p  | DDX54   | 79039 | ENSG00000123064 | 20371350 | validated |
| mirTarbase | hsa-miR-106b-5p | TMEM38A | 79041 | ENSG00000072954 | 23446348 | validated |
| mirTarbase | hsa-miR-192-5p  | KCTD15  | 79047 | ENSG00000153885 | 19074876 | validated |
| mirTarbase | hsa-miR-192-5p  | PRRG4   | 79056 | ENSG00000135378 | 19074876 | validated |
| mirTarbase | hsa-miR-106b-5p | PRRG4   | 79056 | ENSG00000135378 | 20371350 | validated |
| mirTarbase | hsa-miR-301a-3p | PRRG4   | 79056 | ENSG00000135378 | 20371350 | validated |
| mirTarbase | hsa-miR-15b-5p  | ATG9A   | 79065 | ENSG00000198925 | 22473208 | validated |

|            |                 |         |       |                 |          |           |
|------------|-----------------|---------|-------|-----------------|----------|-----------|
| mirtarbase | hsa-miR-106b-5p | ELOVL6  | 79071 | ENSG00000170522 | 23622248 | validated |
| mirtarbase | hsa-miR-15b-5p  | TMEM109 | 79073 | ENSG00000110108 | 22473208 | validated |
| mirtarbase | hsa-miR-192-5p  | C2orf49 | 79074 | ENSG00000135974 | 19074876 | validated |
| mirtarbase | hsa-miR-106b-5p | DCTPP1  | 79077 | ENSG00000179958 | 23622248 | validated |
| mirtarbase | hsa-miR-106b-5p | C1orf50 | 79078 | ENSG00000164008 | 23313552 | validated |
| mirtarbase | hsa-miR-181a-5p | ZNF426  | 79088 | ENSG00000130818 | 17612493 | validated |
| mirtarbase | hsa-miR-106b-5p | ZNF426  | 79088 | ENSG00000130818 | 23313552 | validated |
| mirtarbase | hsa-miR-18a-5p  | TMUB2   | 79089 | ENSG00000168591 | 20371350 | validated |
| mirtarbase | hsa-miR-15b-5p  | CHAC1   | 79094 | ENSG00000128965 | 23592263 | validated |
| mirtarbase | hsa-miR-144-3p  | CHAC1   | 79094 | ENSG00000128965 | 23592263 | validated |
| mirtarbase | hsa-miR-212-3p  | CHAC1   | 79094 | ENSG00000128965 | 23592263 | validated |
| mirtarbase | hsa-miR-192-5p  | RNF26   | 79102 | ENSG00000173456 | 19074876 | validated |
| mirtarbase | hsa-miR-21-5p   | DERL1   | 79139 | ENSG00000136986 | 19253296 | validated |
| mirtarbase | hsa-miR-181a-5p | CHCHD7  | 79145 | ENSG00000170791 | 22473208 | validated |
| mirtarbase | hsa-miR-301a-3p | GNPTAB  | 79158 | ENSG00000111670 | 21572407 | validated |
| mirtarbase | hsa-miR-106b-5p | GNPTAB  | 79158 | ENSG00000111670 | 21572407 | validated |
| mirtarbase | hsa-miR-181a-5p | CENPO   | 79172 | ENSG00000138092 | 19536157 | validated |
| mirtarbase | hsa-miR-106b-5p | TTPAL   | 79183 | ENSG00000124120 | 23622248 | validated |
| mirtarbase | hsa-miR-181a-5p | TTPAL   | 79183 | ENSG00000124120 | 22473208 | validated |
| mirtarbase | hsa-miR-15b-5p  | TMEM43  | 79188 | ENSG00000170876 | 23622248 | validated |
| mirtarbase | hsa-miR-21-5p   | DCAF10  | 79269 | ENSG00000122741 | 18591254 | validated |
| mirtarbase | hsa-miR-192-5p  | ZXDC    | 79364 | ENSG00000070476 | 19074876 | validated |
| mirtarbase | hsa-miR-192-5p  | HAUS3   | 79441 | ENSG00000214367 | 19074876 | validated |
| mirtarbase | hsa-miR-15b-5p  | HAUS3   | 79441 | ENSG00000214367 | 23446348 | validated |
| mirtarbase | hsa-miR-106b-5p | FYCO1   | 79443 | ENSG00000163820 | 22473208 | validated |
| mirtarbase | hsa-miR-15b-5p  | PAGR1   | 79447 | ENSG00000280789 | 23446348 | validated |
| mirtarbase | hsa-miR-326     | ULBP3   | 79465 | ENSG00000131019 | 23824327 | validated |
| mirtarbase | hsa-miR-15b-5p  | ATP13A3 | 79572 | ENSG00000133657 | 22473208 | validated |
| mirtarbase | hsa-miR-301a-3p | NKAP    | 79576 | ENSG00000101882 | 23824327 | validated |
| mirtarbase | hsa-miR-582-5p  | NKAP    | 79576 | ENSG00000101882 | 27292025 | validated |
| mirtarbase | hsa-miR-15b-5p  | CHPF    | 79586 | ENSG00000123989 | 23622248 | validated |
| mirtarbase | hsa-miR-192-5p  | OBI1    | 79596 | ENSG00000152193 | 19074876 | validated |
| mirtarbase | hsa-miR-21-5p   | CEP97   | 79598 | ENSG00000182504 | 18591254 | validated |
| mirtarbase | hsa-miR-106b-5p | CEP97   | 79598 | ENSG00000182504 | 22473208 | validated |
| mirtarbase | hsa-miR-106b-5p | VCPKMT  | 79609 | ENSG00000100483 | 22473208 | validated |
| mirtarbase | hsa-miR-15b-5p  | TANGO6  | 79613 | ENSG00000103047 | 23622248 | validated |
| mirtarbase | hsa-miR-222-3p  | TANGO6  | 79613 | ENSG00000103047 | 23622248 | validated |
| mirtarbase | hsa-miR-15b-5p  | HMBOX1  | 79618 | ENSG00000147421 | 22473208 | validated |
| mirtarbase | hsa-miR-222-3p  | HMBOX1  | 79618 | ENSG00000147421 | 22012620 | validated |
| mirtarbase | hsa-miR-106b-5p | HMBOX1  | 79618 | ENSG00000147421 | 22012620 | validated |
| mirtarbase | hsa-miR-106b-5p | ARMT1   | 79624 | ENSG00000146476 | 27418678 | validated |
| mirtarbase | hsa-miR-192-5p  | OGFRL1  | 79627 | ENSG00000119900 | 19074876 | validated |
| mirtarbase | hsa-miR-212-3p  | SH3TC2  | 79628 | ENSG00000169247 | 27292025 | validated |
| mirtarbase | hsa-miR-192-5p  | SCRN3   | 79634 | ENSG00000144306 | 19074876 | validated |
| mirtarbase | hsa-miR-192-5p  | CCDC121 | 79635 | ENSG00000176714 | 19074876 | validated |
| mirtarbase | hsa-miR-106b-5p | ARSJ    | 79642 | ENSG00000180801 | 21572407 | validated |
| mirtarbase | hsa-miR-181a-5p | ARSJ    | 79642 | ENSG00000180801 | 21572407 | validated |
| mirtarbase | hsa-miR-106b-5p | PANK3   | 79646 | ENSG00000120137 | 23622248 | validated |
| mirtarbase | hsa-miR-222-3p  | PANK3   | 79646 | ENSG00000120137 | 23622248 | validated |
| mirtarbase | hsa-miR-144-3p  | AKIRIN1 | 79647 | ENSG00000174574 | 23592263 | validated |
| mirtarbase | hsa-miR-15b-5p  | MCPH1   | 79648 | ENSG00000147316 | 23622248 | validated |
| mirtarbase | hsa-miR-192-5p  | RPAP3   | 79657 | ENSG00000005175 | 19074876 | validated |
| mirtarbase | hsa-miR-106b-5p | PPP1R3B | 79660 | ENSG00000173281 | 22473208 | validated |
| mirtarbase | hsa-miR-192-5p  | HSPBAP1 | 79663 | ENSG00000169087 | 19074876 | validated |
| mirtarbase | hsa-miR-326     | DHX40   | 79665 | ENSG00000108406 | 23592263 | validated |
| mirtarbase | hsa-miR-192-5p  | PLEKHF2 | 79666 | ENSG00000175895 | 19074876 | validated |
| mirtarbase | hsa-miR-301a-3p | PLEKHF2 | 79666 | ENSG00000175895 | 24398324 | validated |
| mirtarbase | hsa-miR-222-3p  | SMC6    | 79677 | ENSG00000163029 | 23622248 | validated |
| mirtarbase | hsa-miR-296-5p  | RTL10   | 79680 | ENSG00000215012 | 26701625 | validated |
| mirtarbase | hsa-miR-222-3p  | SAP30L  | 79685 | ENSG00000164576 | 23622248 | validated |
| mirtarbase | hsa-miR-15b-5p  | YRDC    | 79693 | ENSG00000196449 | 21572407 | validated |
| mirtarbase | hsa-miR-192-5p  | GALNT12 | 79695 | ENSG00000119514 | 19074876 | validated |
| mirtarbase | hsa-miR-21-5p   | ZYG11B  | 79699 | ENSG00000162378 | 18591254 | validated |
| mirtarbase | hsa-miR-192-5p  | NOL9    | 79707 | ENSG00000162408 | 23824327 | validated |
| mirtarbase | hsa-miR-21-5p   | TBL1XR1 | 79718 | ENSG00000177565 | 18591254 | validated |
| mirtarbase | hsa-miR-326     | TBL1XR1 | 79718 | ENSG00000177565 | 23592263 | validated |
| mirtarbase | hsa-miR-106b-5p | TBL1XR1 | 79718 | ENSG00000177565 | 22012620 | validated |
| mirtarbase | hsa-miR-181a-5p | TBL1XR1 | 79718 | ENSG00000177565 | 22473208 | validated |
| mirtarbase | hsa-miR-15b-5p  | TBL1XR1 | 79718 | ENSG00000177565 | 22473208 | validated |
| mirtarbase | hsa-miR-296-5p  | VPS37B  | 79720 | ENSG00000139722 | 23446348 | validated |
| mirtarbase | hsa-miR-301a-3p | VPS37B  | 79720 | ENSG00000139722 | 23446348 | validated |

|            |                 |          |       |                 |          |           |
|------------|-----------------|----------|-------|-----------------|----------|-----------|
| mirTarbase | hsa-miR-181a-5p | SUV39H2  | 79723 | ENSG00000152455 | 20371350 | validated |
| mirTarbase | hsa-miR-192-5p  | E2F8     | 79733 | ENSG00000129173 | 19074876 | validated |
| mirTarbase | hsa-miR-106b-5p | TBC1D17  | 79735 | ENSG00000104946 | 22473208 | validated |
| mirTarbase | hsa-miR-192-5p  | CLIP4    | 79745 | ENSG00000115295 | 19074876 | validated |
| mirTarbase | hsa-miR-21-5p   | CLIP4    | 79745 | ENSG00000115295 | 18591254 | validated |
| mirTarbase | hsa-miR-106b-5p | CLIP4    | 79745 | ENSG00000115295 | 20371350 | validated |
| mirTarbase | hsa-miR-15b-5p  | CLIP4    | 79745 | ENSG00000115295 | 21572407 | validated |
| mirTarbase | hsa-miR-15b-5p  | SLC25A22 | 79751 | ENSG00000177542 | 22473208 | validated |
| mirTarbase | hsa-miR-301a-3p | SNIP1    | 79753 | ENSG00000163877 | 26338824 | validated |
| mirTarbase | hsa-miR-18a-5p  | TXNDC15  | 79770 | ENSG00000113621 | 23622248 | validated |
| mirTarbase | hsa-miR-15b-5p  | ZFHx4    | 79776 | ENSG00000091656 | 23446348 | validated |
| mirTarbase | hsa-miR-301a-3p | KLHL36   | 79786 | ENSG00000135686 | 23446348 | validated |
| mirTarbase | hsa-miR-106b-5p | KLHL36   | 79786 | ENSG00000135686 | 23446348 | validated |
| mirTarbase | hsa-miR-106b-5p | ZNF665   | 79788 | ENSG00000197497 | 23313552 | validated |
| mirTarbase | hsa-miR-192-5p  | FBXO31   | 79791 | ENSG00000103264 | 19074876 | validated |
| mirTarbase | hsa-miR-106b-5p | FBXO31   | 79791 | ENSG00000103264 | 22473208 | validated |
| mirTarbase | hsa-miR-192-5p  | VASH2    | 79805 | ENSG00000143494 | 19074876 | validated |
| mirTarbase | hsa-miR-21-5p   | VASH2    | 79805 | ENSG00000143494 | 19253296 | validated |
| mirTarbase | hsa-miR-106b-5p | AGMAT    | 79814 | ENSG00000116771 | 20371350 | validated |
| mirTarbase | hsa-miR-181a-5p | MOB3B    | 79817 | ENSG00000120162 | 17612493 | validated |
| mirTarbase | hsa-miR-106b-5p | METTL8   | 79828 | ENSG00000123600 | 23313552 | validated |
| mirTarbase | hsa-miR-192-5p  | ZMYM1    | 79830 | ENSG00000197056 | 19074876 | validated |
| mirTarbase | hsa-miR-106b-5p | ZMYM1    | 79830 | ENSG00000197056 | 22012620 | validated |
| mirTarbase | hsa-miR-505-3p  | QSER1    | 79832 | ENSG00000060749 | 20371350 | validated |
| mirTarbase | hsa-miR-106b-5p | PEAK1    | 79834 | ENSG00000173517 | 22473208 | validated |
| mirTarbase | hsa-miR-106b-5p | PIP4K2C  | 79837 | ENSG00000166908 | 22473208 | validated |
| mirTarbase | hsa-miR-192-5p  | MFSd13A  | 79847 | ENSG00000138111 | 19074876 | validated |
| mirTarbase | hsa-miR-106b-5p | TLCD3A   | 79850 | ENSG00000167695 | 22473208 | validated |
| mirTarbase | hsa-miR-181a-5p | ZNF669   | 79862 | ENSG00000188295 | 24398324 | validated |
| mirTarbase | hsa-miR-192-5p  | BORA     | 79866 | ENSG00000136122 | 19074876 | validated |
| mirTarbase | hsa-miR-15b-5p  | CPSF7    | 79869 | ENSG00000149532 | 23592263 | validated |
| mirTarbase | hsa-miR-192-5p  | RPAP2    | 79871 | ENSG00000122484 | 19074876 | validated |
| mirTarbase | hsa-miR-192-5p  | UBA5     | 79876 | ENSG00000081307 | 22291592 | validated |
| mirTarbase | hsa-miR-181a-5p | LPCAT1   | 79888 | ENSG00000153395 | 22473208 | validated |
| mirTarbase | hsa-miR-21-5p   | CYBRD1   | 79901 | ENSG00000071967 | 18591254 | validated |
| mirTarbase | hsa-miR-301a-3p | CYBRD1   | 79901 | ENSG00000071967 | 23622248 | validated |
| mirTarbase | hsa-miR-106b-5p | CYBRD1   | 79901 | ENSG00000071967 | 22473208 | validated |
| mirTarbase | hsa-miR-15b-5p  | TMC7     | 79905 | ENSG00000170537 | 23622248 | validated |
| mirTarbase | hsa-miR-192-5p  | ATAD5    | 79915 | ENSG00000176208 | 19074876 | validated |
| mirTarbase | hsa-miR-15b-5p  | ATAD5    | 79915 | ENSG00000176208 | 23446348 | validated |
| mirTarbase | hsa-miR-301a-3p | ADM2     | 79924 | ENSG00000128165 | 23824327 | validated |
| mirTarbase | hsa-miR-192-5p  | MAP6D1   | 79929 | ENSG00000180834 | 19074876 | validated |
| mirTarbase | hsa-miR-106b-5p | TNIP3    | 79931 | ENSG00000050730 | 23313552 | validated |
| mirTarbase | hsa-miR-106b-5p | SYNPO2L  | 79933 | ENSG00000166317 | 23313552 | validated |
| mirTarbase | hsa-miR-192-5p  | CNTNAP3  | 79937 | ENSG00000106714 | 19074876 | validated |
| mirTarbase | hsa-miR-192-5p  | L2HGDH   | 79944 | ENSG00000087299 | 19074876 | validated |
| mirTarbase | hsa-miR-582-5p  | L2HGDH   | 79944 | ENSG00000087299 | 23592263 | validated |
| mirTarbase | hsa-miR-15b-5p  | L2HGDH   | 79944 | ENSG00000087299 | 24398324 | validated |
| mirTarbase | hsa-miR-301a-3p | PLEKHS1  | 79949 | ENSG00000148735 | 23824327 | validated |
| mirTarbase | hsa-miR-192-5p  | ERMP1    | 79956 | ENSG00000099219 | 19074876 | validated |
| mirTarbase | hsa-miR-192-5p  | JADE1    | 79960 | ENSG00000077684 | 19074876 | validated |
| mirTarbase | hsa-miR-21-5p   | JADE1    | 79960 | ENSG00000077684 | 18591254 | validated |
| mirTarbase | hsa-miR-192-5p  | WDR76    | 79968 | ENSG00000092470 | 19074876 | validated |
| mirTarbase | hsa-miR-106b-5p | ATAT1    | 79969 | ENSG00000223752 | 23824327 | validated |
| mirTarbase | hsa-miR-192-5p  | DSN1     | 79980 | ENSG00000149636 | 19074876 | validated |
| mirTarbase | hsa-miR-222-3p  | DNAJB14  | 79982 | ENSG00000164031 | 26701625 | validated |
| mirTarbase | hsa-miR-222-3p  | STN1     | 79991 | ENSG00000107960 | 23446348 | validated |
| mirTarbase | hsa-miR-21-5p   | ELOVL7   | 79993 | ENSG00000164181 | 18591254 | validated |
| mirTarbase | hsa-miR-106b-5p | PCNX2    | 80003 | ENSG00000135749 | 21572407 | validated |
| mirTarbase | hsa-miR-21-5p   | DOCK5    | 80005 | ENSG00000147459 | 22158624 | validated |
| mirTarbase | hsa-miR-222-3p  | DOCK5    | 80005 | ENSG00000147459 | 23622248 | validated |
| mirTarbase | hsa-miR-192-5p  | RMI1     | 80010 | ENSG00000178966 | 19074876 | validated |
| mirTarbase | hsa-miR-181a-5p | PSME3IP1 | 80011 | ENSG00000172775 | 22473208 | validated |
| mirTarbase | hsa-miR-181a-5p | PHC3     | 80012 | ENSG00000173889 | 22473208 | validated |
| mirTarbase | hsa-miR-15b-5p  | PHC3     | 80012 | ENSG00000173889 | 22473208 | validated |
| mirTarbase | hsa-miR-192-5p  | WWC2     | 80014 | ENSG00000151718 | 19074876 | validated |
| mirTarbase | hsa-miR-21-5p   | WWC2     | 80014 | ENSG00000151718 | 19253296 | validated |
| mirTarbase | hsa-miR-15b-5p  | NAA25    | 80018 | ENSG00000111300 | 23592263 | validated |
| mirTarbase | hsa-miR-106b-5p | FOXRED2  | 80020 | ENSG00000100350 | 23313552 | validated |
| mirTarbase | hsa-miR-222-3p  | FBXL18   | 80028 | ENSG00000155034 | 23313552 | validated |
| mirTarbase | hsa-miR-15b-5p  | FBXL18   | 80028 | ENSG00000155034 | 26701625 | validated |



|            |                 |           |       |                 |          |           |
|------------|-----------------|-----------|-------|-----------------|----------|-----------|
| mirtarbase | hsa-miR-181a-5p | ZNF556    | 80032 | ENSG00000172000 | 23824327 | validated |
| mirtarbase | hsa-miR-18a-5p  | CSRN3P3   | 80034 | ENSG00000178662 | 16331254 | validated |
| mirtarbase | hsa-miR-106b-5p | GPR157    | 80045 | ENSG00000180758 | 23592263 | validated |
| mirtarbase | hsa-miR-181a-5p | PGAP1     | 80055 | ENSG00000197121 | 22473208 | validated |
| mirtarbase | hsa-miR-181a-5p | ATF7IP2   | 80063 | ENSG00000166669 | 17612493 | validated |
| mirtarbase | hsa-miR-15b-5p  | DCAF17    | 80067 | ENSG00000115827 | 23706177 | validated |
| mirtarbase | hsa-miR-212-3p  | DCAF17    | 80067 | ENSG00000115827 | 23706177 | validated |
| mirtarbase | hsa-miR-192-5p  | CCDC15    | 80071 | ENSG00000149548 | 19074876 | validated |
| mirtarbase | hsa-miR-15b-5p  | C3orf36   | 80111 |                 | 23824327 | validated |
| mirtarbase | hsa-miR-192-5p  | PIF1      | 80119 | ENSG00000140451 | 19074876 | validated |
| mirtarbase | hsa-miR-192-5p  | BBOF1     | 80127 | ENSG00000119636 | 19074876 | validated |
| mirtarbase | hsa-miR-18a-5p  | ZNF703    | 80139 | ENSG00000183779 | 23622248 | validated |
| mirtarbase | hsa-miR-106b-5p | SIKE1     | 80143 | ENSG00000052723 | 22473208 | validated |
| mirtarbase | hsa-miR-106b-5p | UXS1      | 80146 | ENSG00000115652 | 22473208 | validated |
| mirtarbase | hsa-miR-192-5p  | ASRGL1    | 80150 | ENSG00000162174 | 19074876 | validated |
| mirtarbase | hsa-miR-21-5p   | ASRGL1    | 80150 | ENSG00000162174 | 18591254 | validated |
| mirtarbase | hsa-miR-15b-5p  | EDC3      | 80153 | ENSG00000179151 | 22473208 | validated |
| mirtarbase | hsa-miR-296-5p  | NAA15     | 80155 | ENSG00000164134 | 23824327 | validated |
| mirtarbase | hsa-miR-106b-5p | ABHD18    | 80167 | ENSG00000164074 | 23313552 | validated |
| mirtarbase | hsa-miR-15b-5p  | IFT74     | 80173 | ENSG00000096872 | 22473208 | validated |
| mirtarbase | hsa-miR-192-5p  | DBF4B     | 80174 | ENSG00000161692 | 19074876 | validated |
| mirtarbase | hsa-miR-505-3p  | MYO19     | 80179 | ENSG00000278372 | 23622248 | validated |
| mirtarbase | hsa-miR-106b-5p | TMEM134   | 80194 | ENSG00000172663 | 23446348 | validated |
| mirtarbase | hsa-miR-181a-5p | RNF34     | 80196 | ENSG00000170633 | 20371350 | validated |
| mirtarbase | hsa-miR-106b-5p | RNF34     | 80196 | ENSG00000170633 | 23313552 | validated |
| mirtarbase | hsa-miR-181a-5p | FBXO11    | 80204 | ENSG00000138081 | 20371350 | validated |
| mirtarbase | hsa-miR-21-5p   | FBXO11    | 80204 | ENSG00000138081 | 18591254 | validated |
| mirtarbase | hsa-miR-106b-5p | CHD9      | 80205 | ENSG00000177200 | 22473208 | validated |
| mirtarbase | hsa-miR-181a-5p | CHD9      | 80205 | ENSG00000177200 | 22473208 | validated |
| mirtarbase | hsa-miR-21-5p   | SPG11     | 80208 | ENSG00000104133 | 18591254 | validated |
| mirtarbase | hsa-miR-21-5p   | PROSER1   | 80209 | ENSG00000120685 | 18591254 | validated |
| mirtarbase | hsa-miR-192-5p  | NAA50     | 80218 | ENSG00000121579 | 19074876 | validated |
| mirtarbase | hsa-miR-106b-5p | NAA50     | 80218 | ENSG00000121579 | 22473208 | validated |
| mirtarbase | hsa-miR-21-5p   | NAA50     | 80218 | ENSG00000121579 | 22473208 | validated |
| mirtarbase | hsa-miR-301a-3p | NAA50     | 80218 | ENSG00000121579 | 23824327 | validated |
| mirtarbase | hsa-miR-181a-5p | NAA50     | 80218 | ENSG00000121579 | 22473208 | validated |
| mirtarbase | hsa-miR-301a-3p | RAB11FIP1 | 80223 | ENSG00000156675 | 23824327 | validated |
| mirtarbase | hsa-miR-106b-5p | RAB11FIP1 | 80223 | ENSG00000156675 | 22473208 | validated |
| mirtarbase | hsa-miR-21-5p   | NUBPL     | 80224 | ENSG00000151413 | 18591254 | validated |
| mirtarbase | hsa-miR-106b-5p | ORAI2     | 80228 | ENSG00000160991 | 23313552 | validated |
| mirtarbase | hsa-miR-582-5p  | ORAI2     | 80228 | ENSG00000160991 | 26701625 | validated |
| mirtarbase | hsa-miR-301a-3p | CXorf21   | 80231 | ENSG00000120280 | 23824327 | validated |
| mirtarbase | hsa-miR-106b-5p | SLC35F5   | 80255 | ENSG00000115084 | 22473208 | validated |
| mirtarbase | hsa-miR-144-3p  | SLC35F5   | 80255 | ENSG00000115084 | 23592263 | validated |
| mirtarbase | hsa-miR-301a-3p | C16orf70  | 80262 | ENSG00000125149 | 21572407 | validated |
| mirtarbase | hsa-miR-106b-5p | C16orf70  | 80262 | ENSG00000125149 | 21572407 | validated |
| mirtarbase | hsa-miR-505-3p  | EDEM3     | 80267 | ENSG00000116406 | 23313552 | validated |
| mirtarbase | hsa-miR-106b-5p | PLEKHO2   | 80301 | ENSG00000241839 | 22473208 | validated |
| mirtarbase | hsa-miR-192-5p  | WDCP      | 80304 | ENSG00000163026 | 19074876 | validated |
| mirtarbase | hsa-miR-144-3p  | WDCP      | 80304 | ENSG00000163026 | 23592263 | validated |
| mirtarbase | hsa-miR-21-5p   | PDGFD     | 80310 | ENSG00000170962 | 18591254 | validated |
| mirtarbase | hsa-miR-192-5p  | KLHL15    | 80311 | ENSG00000174010 | 19074876 | validated |
| mirtarbase | hsa-miR-21-5p   | KLHL15    | 80311 | ENSG00000174010 | 18591254 | validated |
| mirtarbase | hsa-miR-181a-5p | KLHL15    | 80311 | ENSG00000174010 | 23622248 | validated |
| mirtarbase | hsa-miR-106b-5p | KLHL15    | 80311 | ENSG00000174010 | 22473208 | validated |
| mirtarbase | hsa-miR-15b-5p  | KLHL15    | 80311 | ENSG00000174010 | 20371350 | validated |
| mirtarbase | hsa-miR-21-5p   | TET1      | 80312 | ENSG00000138336 | 18591254 | validated |
| mirtarbase | hsa-miR-505-3p  | TET1      | 80312 | ENSG00000138336 | 23824327 | validated |
| mirtarbase | hsa-miR-181a-5p | CPEB4     | 80315 | ENSG00000113742 | 22473208 | validated |
| mirtarbase | hsa-miR-15b-5p  | DNAJC5    | 80331 | ENSG00000101152 | 23622248 | validated |
| mirtarbase | hsa-miR-192-5p  | TRAF3IP3  | 80342 | ENSG00000009790 | 19074876 | validated |
| mirtarbase | hsa-miR-21-5p   | DCAF11    | 80344 | ENSG00000100897 | 26701625 | validated |
| mirtarbase | hsa-miR-296-5p  | REEP4     | 80346 | ENSG00000168476 | 27292025 | validated |
| mirtarbase | hsa-miR-144-3p  | COASY     | 80347 | ENSG00000068120 | 23592263 | validated |
| mirtarbase | hsa-miR-106b-5p | TNKS2     | 80351 | ENSG00000107854 | 22473208 | validated |
| mirtarbase | hsa-miR-222-3p  | SLC19A3   | 80704 | ENSG00000135917 | 23592263 | validated |
| mirtarbase | hsa-miR-181a-5p | SLC35G2   | 80723 | ENSG00000168917 | 21572407 | validated |
| mirtarbase | hsa-miR-15b-5p  | NDFIP1    | 80762 | ENSG00000131507 | 23622248 | validated |
| mirtarbase | hsa-miR-582-5p  | ZNF436    | 80818 | ENSG00000125945 | 23592263 | validated |
| mirtarbase | hsa-miR-192-5p  | DDHD1     | 80821 | ENSG00000100523 | 19074876 | validated |
| mirtarbase | hsa-miR-106b-5p | DDHD1     | 80821 | ENSG00000100523 | 22473208 | validated |

|            |                 |          |       |                 |          |           |
|------------|-----------------|----------|-------|-----------------|----------|-----------|
| mirTarbase | hsa-miR-192-5p  | DUSP16   | 80824 | ENSG00000111266 | 19074876 | validated |
| mirTarbase | hsa-miR-181a-5p | APOL6    | 80830 | ENSG00000221963 | 22473208 | validated |
| mirTarbase | hsa-miR-21-5p   | LNPk     | 80856 | ENSG00000144320 | 18591254 | validated |
| mirTarbase | hsa-miR-212-3p  | SLC25A32 | 81034 | ENSG00000164933 | 23824327 | validated |
| mirTarbase | hsa-miR-222-3p  | PTDSS2   | 81490 | ENSG00000282367 | 23622248 | validated |
| mirTarbase | hsa-miR-192-5p  | SGPP1    | 81537 | ENSG00000126821 | 19074876 | validated |
| mirTarbase | hsa-miR-15b-5p  | VOPP1    | 81552 | ENSG00000154978 | 23622248 | validated |
| mirTarbase | hsa-miR-15b-5p  | C1orf21  | 81563 | ENSG00000116667 | 23446348 | validated |
| mirTarbase | hsa-miR-301a-3p | PDRG1    | 81572 | ENSG00000088356 | 23592263 | validated |
| mirTarbase | hsa-miR-106b-5p | PDRG1    | 81572 | ENSG00000088356 | 23592263 | validated |
| mirTarbase | hsa-miR-181a-5p | ANKRD13C | 81573 | ENSG00000118454 | 17612493 | validated |
| mirTarbase | hsa-miR-106b-5p | ANKRD13C | 81573 | ENSG00000118454 | 22473208 | validated |
| mirTarbase | hsa-miR-192-5p  | APOLD1   | 81575 | ENSG00000178878 | 19074876 | validated |
| mirTarbase | hsa-miR-21-5p   | APOLD1   | 81575 | ENSG00000178878 | 18591254 | validated |
| mirTarbase | hsa-miR-301a-3p | PLA2G12A | 81579 | ENSG00000123739 | 23824327 | validated |
| mirTarbase | hsa-miR-15b-5p  | CDADC1   | 81602 | ENSG00000102543 | 20371350 | validated |
| mirTarbase | hsa-miR-301a-3p | CDADC1   | 81602 | ENSG00000102543 | 22100165 | validated |
| mirTarbase | hsa-miR-106b-5p | TRIM8    | 81603 | ENSG00000171206 | 22473208 | validated |
| mirTarbase | hsa-miR-192-5p  | FAM83D   | 81610 | ENSG00000101447 | 19074876 | validated |
| mirTarbase | hsa-miR-106b-5p | FAM83D   | 81610 | ENSG00000101447 | 22473208 | validated |
| mirTarbase | hsa-miR-192-5p  | CAB39L   | 81617 | ENSG00000102547 | 19074876 | validated |
| mirTarbase | hsa-miR-18a-5p  | ITM2C    | 81618 | ENSG00000135916 | 23446348 | validated |
| mirTarbase | hsa-miR-192-5p  | MAP1LC3B | 81631 | ENSG00000140941 | 19074876 | validated |
| mirTarbase | hsa-miR-505-3p  | VMP1     | 81671 | ENSG00000062716 | 23592263 | validated |
| mirTarbase | hsa-miR-212-3p  | VMP1     | 81671 | ENSG00000062716 | 23592263 | validated |
| mirTarbase | hsa-miR-192-5p  | C6orf62  | 81688 | ENSG00000112308 | 19074876 | validated |
| mirTarbase | hsa-miR-192-5p  | REXO5    | 81691 | ENSG00000005189 | 19074876 | validated |
| mirTarbase | hsa-miR-301a-3p | PPP1R14C | 81706 | ENSG00000198729 | 21572407 | validated |
| mirTarbase | hsa-miR-222-3p  | PPP1R14C | 81706 | ENSG00000198729 | 23446348 | validated |
| mirTarbase | hsa-miR-106b-5p | SLCO5A1  | 81796 | ENSG00000137571 | 22100165 | validated |
| mirTarbase | hsa-miR-21-5p   | NETO2    | 81831 | ENSG00000171208 | 18591254 | validated |
| mirTarbase | hsa-miR-106b-5p | NETO2    | 81831 | ENSG00000171208 | 23592263 | validated |
| mirTarbase | hsa-miR-192-5p  | VANGL1   | 81839 | ENSG00000173218 | 19074876 | validated |
| mirTarbase | hsa-miR-222-3p  | VANGL1   | 81839 | ENSG00000173218 | 22012620 | validated |
| mirTarbase | hsa-miR-18a-5p  | RNF146   | 81847 | ENSG00000118518 | 21572407 | validated |
| mirTarbase | hsa-miR-192-5p  | SPRY4    | 81848 | ENSG00000187678 | 19074876 | validated |
| mirTarbase | hsa-miR-21-5p   | SPRY4    | 81848 | ENSG00000187678 | 23824327 | validated |
| mirTarbase | hsa-miR-192-5p  | ZNF611   | 81856 | ENSG00000213020 | 19074876 | validated |
| mirTarbase | hsa-miR-222-3p  | ISG20L2  | 81875 | ENSG00000143319 | 23622248 | validated |
| mirTarbase | hsa-miR-15b-5p  | RAB1B    | 81876 | ENSG00000174903 | 23622248 | validated |
| mirTarbase | hsa-miR-106b-5p | FAHD1    | 81889 | ENSG00000180185 | 19536157 | validated |
| mirTarbase | hsa-miR-18a-5p  | SLC25A28 | 81894 | ENSG00000155287 | 23592263 | validated |
| mirTarbase | hsa-miR-192-5p  | KIF18A   | 81930 | ENSG00000121621 | 19074876 | validated |
| mirTarbase | hsa-miR-106b-5p | ZNF93    | 81931 | ENSG00000184635 | 22012620 | validated |
| mirTarbase | hsa-miR-15b-5p  | GSG1     | 83445 | ENSG00000111305 | 21572407 | validated |
| mirTarbase | hsa-miR-582-5p  | RAB33B   | 83452 | ENSG00000172007 | 21572407 | validated |
| mirTarbase | hsa-miR-18a-5p  | MXD3     | 83463 | ENSG00000213347 | 23622248 | validated |
| mirTarbase | hsa-miR-192-5p  | NUF2     | 83540 | ENSG00000143228 | 19074876 | validated |
| mirTarbase | hsa-miR-192-5p  | DNAL1    | 83544 | ENSG00000119661 | 19074876 | validated |
| mirTarbase | hsa-miR-106b-5p | DNAL1    | 83544 | ENSG00000119661 | 23313552 | validated |
| mirTarbase | hsa-miR-192-5p  | UCK1     | 83549 | ENSG00000130717 | 19074876 | validated |
| mirTarbase | hsa-miR-326     | UCK1     | 83549 | ENSG00000130717 | 23622248 | validated |
| mirTarbase | hsa-miR-296-5p  | MFRP     | 83552 | ENSG00000235718 | 19536157 | validated |
| mirTarbase | hsa-miR-222-3p  | TMUB1    | 83590 | ENSG00000164897 | 23622248 | validated |
| mirTarbase | hsa-miR-15b-5p  | RASSF5   | 83593 | ENSG00000266094 | 22473208 | validated |
| mirTarbase | hsa-miR-181a-5p | NUDT12   | 83594 | ENSG00000112874 | 17612493 | validated |
| mirTarbase | hsa-miR-15b-5p  | BCL2L12  | 83596 | ENSG00000126453 | 26701625 | validated |
| mirTarbase | hsa-miR-15b-5p  | AMMECR1L | 83607 | ENSG00000144233 | 23622248 | validated |
| mirTarbase | hsa-miR-222-3p  | C19orf12 | 83636 | ENSG00000131943 | 21572407 | validated |
| mirTarbase | hsa-miR-15b-5p  | RAMAC    | 83640 | ENSG00000169612 | 23446348 | validated |
| mirTarbase | hsa-miR-21-5p   | PARP9    | 83666 | ENSG00000138496 | 18591254 | validated |
| mirTarbase | hsa-miR-106b-5p | SESN2    | 83667 | ENSG00000130766 | 22473208 | validated |
| mirTarbase | hsa-miR-212-3p  | CALN1    | 83698 | ENSG00000183166 | 19536157 | validated |
| mirTarbase | hsa-miR-106b-5p | CRISPLD2 | 83716 | ENSG00000103196 | 23446348 | validated |
| mirTarbase | hsa-miR-181a-5p | ATG10    | 83734 | ENSG00000152348 | 17612493 | validated |
| mirTarbase | hsa-miR-192-5p  | ATG10    | 83734 | ENSG00000152348 | 19074876 | validated |
| mirTarbase | hsa-miR-326     | GRWD1    | 83743 | ENSG00000105447 | 23824327 | validated |
| mirTarbase | hsa-miR-181a-5p | ROPN1L   | 83853 | ENSG00000145491 | 17612493 | validated |
| mirTarbase | hsa-miR-192-5p  | ROPN1L   | 83853 | ENSG00000145491 | 19074876 | validated |
| mirTarbase | hsa-miR-181a-5p | FSD1L    | 83856 | ENSG00000106701 | 22473208 | validated |
| mirTarbase | hsa-miR-301a-3p | TMTC1    | 83857 | ENSG00000133687 | 19536157 | validated |

|            |                 |          |       |                 |          |           |
|------------|-----------------|----------|-------|-----------------|----------|-----------|
| mirTarbase | hsa-miR-301a-3p | RAB34    | 83871 | ENSG00000109113 | 21572407 | validated |
| mirTarbase | hsa-miR-106b-5p | MIXL1    | 83881 | ENSG00000185155 | 23446348 | validated |
| mirTarbase | hsa-miR-301a-3p | KCTD10   | 83892 | ENSG00000110906 | 23592263 | validated |
| mirTarbase | hsa-miR-192-5p  | HASPIN   | 83903 | ENSG00000177602 | 19074876 | validated |
| mirTarbase | hsa-miR-106b-5p | STK40    | 83931 | ENSG00000196182 | 23622248 | validated |
| mirTarbase | hsa-miR-296-5p  | TMEM133  | 83935 |                 | 22012620 | validated |
| mirTarbase | hsa-miR-106b-5p | TMEM133  | 83935 |                 | 21572407 | validated |
| mirTarbase | hsa-miR-192-5p  | BRIP1    | 83990 | ENSG00000136492 | 19074876 | validated |
| mirTarbase | hsa-miR-301a-3p | KREMEN1  | 83999 | ENSG00000183762 | 22012620 | validated |
| mirTarbase | hsa-miR-192-5p  | B3GNT5   | 84002 | ENSG00000176597 | 19074876 | validated |
| mirTarbase | hsa-miR-21-5p   | B3GNT5   | 84002 | ENSG00000176597 | 18591254 | validated |
| mirTarbase | hsa-miR-106b-5p | KATNAL1  | 84056 | ENSG00000102781 | 17242205 | validated |
| mirTarbase | hsa-miR-192-5p  | KATNAL1  | 84056 | ENSG00000102781 | 20371350 | validated |
| mirTarbase | hsa-miR-15b-5p  | KATNAL1  | 84056 | ENSG00000102781 | 22473208 | validated |
| mirTarbase | hsa-miR-181a-5p | FAM160A2 | 84067 | ENSG00000051009 | 20371350 | validated |
| mirTarbase | hsa-miR-106b-5p | SLC10A7  | 84068 | ENSG00000120519 | 23622248 | validated |
| mirTarbase | hsa-miR-222-3p  | SLC10A7  | 84068 | ENSG00000120519 | 23824327 | validated |
| mirTarbase | hsa-miR-181a-5p | SLC10A7  | 84068 | ENSG00000120519 | 22473208 | validated |
| mirTarbase | hsa-miR-212-3p  | SLC10A7  | 84068 | ENSG00000120519 | 27292025 | validated |
| mirTarbase | hsa-miR-21-5p   | KBTBD7   | 84078 | ENSG00000120696 | 18591254 | validated |
| mirTarbase | hsa-miR-192-5p  | RAB6C    | 84084 | ENSG00000222014 | 19074876 | validated |
| mirTarbase | hsa-miR-21-5p   | RAB6C    | 84084 | ENSG00000222014 | 18591254 | validated |
| mirTarbase | hsa-miR-15b-5p  | FBXO30   | 84085 | ENSG00000118496 | 23622248 | validated |
| mirTarbase | hsa-miR-106b-5p | QRFPR    | 84109 | ENSG00000186867 | 23313552 | validated |
| mirTarbase | hsa-miR-326     | ZNF394   | 84124 | ENSG00000160908 | 23446348 | validated |
| mirTarbase | hsa-miR-192-5p  | CEP78    | 84131 | ENSG00000148019 | 19074876 | validated |
| mirTarbase | hsa-miR-15b-5p  | USP42    | 84132 | ENSG00000106346 | 23446348 | validated |
| mirTarbase | hsa-miR-15b-5p  | ZNRF3    | 84133 | ENSG00000183579 | 22100165 | validated |
| mirTarbase | hsa-miR-192-5p  | ZNRF3    | 84133 | ENSG00000183579 | 22100165 | validated |
| mirTarbase | hsa-miR-301a-3p | RPF2     | 84154 | ENSG00000197498 | 21572407 | validated |
| mirTarbase | hsa-miR-106b-5p | RPF2     | 84154 | ENSG00000197498 | 21572407 | validated |
| mirTarbase | hsa-miR-106b-5p | GTF2IRD2 | 84163 | ENSG00000196275 | 23313552 | validated |
| mirTarbase | hsa-miR-106b-5p | POLR1B   | 84172 | ENSG00000125630 | 23446348 | validated |
| mirTarbase | hsa-miR-301a-3p | POLR1B   | 84172 | ENSG00000125630 | 23446348 | validated |
| mirTarbase | hsa-miR-192-5p  | TMEM164  | 84187 | ENSG00000157600 | 19074876 | validated |
| mirTarbase | hsa-miR-181a-5p | CIAO2A   | 84191 | ENSG00000166797 | 23592263 | validated |
| mirTarbase | hsa-miR-15b-5p  | USP48    | 84196 | ENSG00000090686 | 21572407 | validated |
| mirTarbase | hsa-miR-106b-5p | USP48    | 84196 | ENSG00000090686 | 21572407 | validated |
| mirTarbase | hsa-miR-192-5p  | MEX3B    | 84206 | ENSG00000183496 | 19074876 | validated |
| mirTarbase | hsa-miR-181a-5p | IQCG     | 84223 | ENSG00000114473 | 17612493 | validated |
| mirTarbase | hsa-miR-192-5p  | LRRC8C   | 84230 | ENSG00000171488 | 19074876 | validated |
| mirTarbase | hsa-miR-21-5p   | TRAF7    | 84231 | ENSG00000131653 | 26080425 | validated |
| mirTarbase | hsa-miR-222-3p  | FYTTD1   | 84248 | ENSG00000122068 | 23622248 | validated |
| mirTarbase | hsa-miR-192-5p  | SLF1     | 84250 | ENSG00000133302 | 19074876 | validated |
| mirTarbase | hsa-miR-181a-5p | SLC37A3  | 84255 | ENSG00000157800 | 20371350 | validated |
| mirTarbase | hsa-miR-192-5p  | DCUN1D5  | 84259 | ENSG00000137692 | 22100165 | validated |
| mirTarbase | hsa-miR-192-5p  | TCHP     | 84260 | ENSG00000139437 | 19074876 | validated |
| mirTarbase | hsa-miR-192-5p  | CHCHD5   | 84269 | ENSG00000125611 | 23824327 | validated |
| mirTarbase | hsa-miR-15b-5p  | POLDIP3  | 84271 | ENSG00000100227 | 21572407 | validated |
| mirTarbase | hsa-miR-106b-5p | YIPF4    | 84272 | ENSG00000119820 | 23446348 | validated |
| mirTarbase | hsa-miR-582-5p  | SLC25A33 | 84275 | ENSG00000171612 | 23592263 | validated |
| mirTarbase | hsa-miR-106b-5p | SLC25A33 | 84275 | ENSG00000171612 | 23313552 | validated |
| mirTarbase | hsa-miR-192-5p  | PRADC1   | 84279 | ENSG00000135617 | 19074876 | validated |
| mirTarbase | hsa-miR-15b-5p  | ZDHHC16  | 84287 | ENSG00000171307 | 21572407 | validated |
| mirTarbase | hsa-miR-106b-5p | PRXL2A   | 84293 | ENSG00000122378 | 23313552 | validated |
| mirTarbase | hsa-miR-192-5p  | PHF6     | 84295 | ENSG00000156531 | 19074876 | validated |
| mirTarbase | hsa-miR-106b-5p | PHF6     | 84295 | ENSG00000156531 | 22473208 | validated |
| mirTarbase | hsa-miR-106b-5p | GINS4    | 84296 | ENSG00000147536 | 23446348 | validated |
| mirTarbase | hsa-miR-106b-5p | LLPH     | 84298 | ENSG00000139233 | 22100165 | validated |
| mirTarbase | hsa-miR-106b-5p | DDI2     | 84301 | ENSG00000197312 | 23313552 | validated |
| mirTarbase | hsa-miR-192-5p  | PGAP4    | 84302 | ENSG00000165152 | 19074876 | validated |
| mirTarbase | hsa-miR-21-5p   | PYM1     | 84305 | ENSG00000170473 | 19253296 | validated |
| mirTarbase | hsa-miR-106b-5p | BRMS1L   | 84312 | ENSG00000100916 | 17242205 | validated |
| mirTarbase | hsa-miR-181a-5p | BRMS1L   | 84312 | ENSG00000100916 | 17612493 | validated |
| mirTarbase | hsa-miR-106b-5p | LZIC     | 84328 | ENSG00000162441 | 23446348 | validated |
| mirTarbase | hsa-miR-301a-3p | LZIC     | 84328 | ENSG00000162441 | 23446348 | validated |
| mirTarbase | hsa-miR-582-5p  | LZIC     | 84328 | ENSG00000162441 | 20371350 | validated |
| mirTarbase | hsa-miR-144-3p  | LZIC     | 84328 | ENSG00000162441 | 20371350 | validated |
| mirTarbase | hsa-miR-18a-5p  | MCRIP2   | 84331 | ENSG00000172366 | 23446348 | validated |
| mirTarbase | hsa-miR-192-5p  | PCGF5    | 84333 | ENSG00000180628 | 19074876 | validated |
| mirTarbase | hsa-miR-192-5p  | HOOK3    | 84376 | ENSG00000168172 | 19074876 | validated |

|            |                 |          |       |                 |          |           |
|------------|-----------------|----------|-------|-----------------|----------|-----------|
| mirtarbase | hsa-miR-181a-5p | HOOK3    | 84376 | ENSG00000168172 | 23622248 | validated |
| mirtarbase | hsa-miR-106b-5p | HOOK3    | 84376 | ENSG00000168172 | 23313552 | validated |
| mirtarbase | hsa-miR-212-3p  | HOOK3    | 84376 | ENSG00000168172 | 22100165 | validated |
| mirtarbase | hsa-miR-326     | HOOK3    | 84376 | ENSG00000168172 | 23824327 | validated |
| mirtarbase | hsa-miR-301a-3p | MSANTD4  | 84437 | ENSG00000170903 | 23446348 | validated |
| mirtarbase | hsa-miR-15b-5p  | MSANTD4  | 84437 | ENSG00000170903 | 20371350 | validated |
| mirtarbase | hsa-miR-144-3p  | LCOR     | 84458 | ENSG00000196233 | 23446348 | validated |
| mirtarbase | hsa-miR-144-3p  | MCM8     | 84515 | ENSG00000125885 | 27418678 | validated |
| mirtarbase | hsa-miR-15b-5p  | DCTN5    | 84516 | ENSG00000166847 | 22473208 | validated |
| mirtarbase | hsa-miR-18a-5p  | DCTN5    | 84516 | ENSG00000166847 | 24398324 | validated |
| mirtarbase | hsa-miR-106b-5p | DCTN5    | 84516 | ENSG00000166847 | 23313552 | validated |
| mirtarbase | hsa-miR-106b-5p | C15orf41 | 84529 | ENSG00000186073 | 23824327 | validated |
| mirtarbase | hsa-miR-192-5p  | KIAA1841 | 84542 | ENSG00000162929 | 19074876 | validated |
| mirtarbase | hsa-miR-106b-5p | KIAA1841 | 84542 | ENSG00000162929 | 23313552 | validated |
| mirtarbase | hsa-miR-192-5p  | MRPL43   | 84545 | ENSG00000055950 | 19074876 | validated |
| mirtarbase | hsa-miR-505-3p  | TMEM185A | 84548 | ENSG00000269556 | 23622248 | validated |
| mirtarbase | hsa-miR-222-3p  | MAK16    | 84549 | ENSG00000198042 | 23622248 | validated |
| mirtarbase | hsa-miR-106b-5p | MAK16    | 84549 | ENSG00000198042 | 22473208 | validated |
| mirtarbase | hsa-miR-192-5p  | FAXC     | 84553 | ENSG00000146267 | 19074876 | validated |
| mirtarbase | hsa-miR-15b-5p  | FAXC     | 84553 | ENSG00000146267 | 23622248 | validated |
| mirtarbase | hsa-miR-106b-5p | FAXC     | 84553 | ENSG00000146267 | 23824327 | validated |
| mirtarbase | hsa-miR-18a-5p  | PARD6B   | 84612 | ENSG00000124171 | 20371350 | validated |
| mirtarbase | hsa-miR-106b-5p | PARD6B   | 84612 | ENSG00000124171 | 22473208 | validated |
| mirtarbase | hsa-miR-106b-5p | ZBTB37   | 84614 | ENSG00000185278 | 20371350 | validated |
| mirtarbase | hsa-miR-222-3p  | ZBTB37   | 84614 | ENSG00000185278 | 22012620 | validated |
| mirtarbase | hsa-miR-181a-5p | ZNF594   | 84622 | ENSG00000180626 | 17612493 | validated |
| mirtarbase | hsa-miR-192-5p  | MFSD14B  | 84641 | ENSG00000148110 | 19074876 | validated |
| mirtarbase | hsa-miR-106b-5p | MYPN     | 84665 | ENSG00000138347 | 23313552 | validated |
| mirtarbase | hsa-miR-192-5p  | FAM126A  | 84668 | ENSG00000122591 | 19074876 | validated |
| mirtarbase | hsa-miR-301a-3p | FAM126A  | 84668 | ENSG00000122591 | 23622248 | validated |
| mirtarbase | hsa-miR-106b-5p | USP32    | 84669 | ENSG00000170832 | 22473208 | validated |
| mirtarbase | hsa-miR-301a-3p | USP32    | 84669 | ENSG00000170832 | 23824327 | validated |
| mirtarbase | hsa-miR-106b-5p | ZNF347   | 84671 | ENSG00000197937 | 23313552 | validated |
| mirtarbase | hsa-miR-181a-5p | DSCR8    | 84677 |                 | 17612493 | validated |
| mirtarbase | hsa-miR-181a-5p | GTPBP3   | 84705 | ENSG00000130299 | 20371350 | validated |
| mirtarbase | hsa-miR-106b-5p | PIGO     | 84720 | ENSG00000165282 | 22473208 | validated |
| mirtarbase | hsa-miR-192-5p  | PSRC1    | 84722 | ENSG00000134222 | 19074876 | validated |
| mirtarbase | hsa-miR-21-5p   | PLEKHA8  | 84725 | ENSG00000106086 | 23313552 | validated |
| mirtarbase | hsa-miR-505-3p  | PRRC2B   | 84726 | ENSG00000130723 | 23622248 | validated |
| mirtarbase | hsa-miR-181a-5p | PRRC2B   | 84726 | ENSG00000130723 | 23622248 | validated |
| mirtarbase | hsa-miR-222-3p  | CBX2     | 84733 | ENSG00000173894 | 23622248 | validated |
| mirtarbase | hsa-miR-15b-5p  | CBX2     | 84733 | ENSG00000173894 | 20371350 | validated |
| mirtarbase | hsa-miR-326     | FAM167B  | 84734 | ENSG00000183615 | 23824327 | validated |
| mirtarbase | hsa-miR-505-3p  | FUT10    | 84750 | ENSG00000172728 | 23592263 | validated |
| mirtarbase | hsa-miR-106b-5p | FUT10    | 84750 | ENSG00000172728 | 23592263 | validated |
| mirtarbase | hsa-miR-192-5p  | LMNB2    | 84823 | ENSG00000176619 | 19074876 | validated |
| mirtarbase | hsa-miR-18a-5p  | LMNB2    | 84823 | ENSG00000176619 | 20371350 | validated |
| mirtarbase | hsa-miR-144-3p  | LMNB2    | 84823 | ENSG00000176619 | 23592263 | validated |
| mirtarbase | hsa-miR-106b-5p | ZNF514   | 84874 | ENSG00000144026 | 23446348 | validated |
| mirtarbase | hsa-miR-106b-5p | ORAI1    | 84876 | ENSG00000276045 | 22473208 | validated |
| mirtarbase | hsa-miR-106b-5p | MFSD2A   | 84879 | ENSG00000168389 | 23824327 | validated |
| mirtarbase | hsa-miR-15b-5p  | AIFM2    | 84883 | ENSG00000042286 | 23622248 | validated |
| mirtarbase | hsa-miR-192-5p  | C1orf198 | 84886 | ENSG00000119280 | 19074876 | validated |
| mirtarbase | hsa-miR-301a-3p | MIGA2    | 84895 | ENSG00000148343 | 23592263 | validated |
| mirtarbase | hsa-miR-181a-5p | MIGA2    | 84895 | ENSG00000148343 | 23592263 | validated |
| mirtarbase | hsa-miR-192-5p  | ATAD1    | 84896 | ENSG00000138138 | 19074876 | validated |
| mirtarbase | hsa-miR-15b-5p  | TBRG1    | 84897 | ENSG00000154144 | 21572407 | validated |
| mirtarbase | hsa-miR-181a-5p | PLXDC2   | 84898 | ENSG00000120594 | 17612493 | validated |
| mirtarbase | hsa-miR-192-5p  | TMTC4    | 84899 | ENSG00000125247 | 19074876 | validated |
| mirtarbase | hsa-miR-106b-5p | NFATC2IP | 84901 | ENSG00000176953 | 22473208 | validated |
| mirtarbase | hsa-miR-582-3p  | ARHGEF39 | 84904 | ENSG00000137135 | 23824327 | validated |
| mirtarbase | hsa-miR-192-5p  | FAM136A  | 84908 | ENSG00000035141 | 20371350 | validated |
| mirtarbase | hsa-miR-21-5p   | FAM136A  | 84908 | ENSG00000035141 | 23592263 | validated |
| mirtarbase | hsa-miR-181a-5p | SLC35B4  | 84912 | ENSG00000205060 | 20371350 | validated |
| mirtarbase | hsa-miR-192-5p  | SLC35B4  | 84912 | ENSG00000205060 | 19074876 | validated |
| mirtarbase | hsa-miR-21-5p   | ZNF587   | 84914 | ENSG00000198466 | 18591254 | validated |
| mirtarbase | hsa-miR-106b-5p | ZNF587   | 84914 | ENSG00000198466 | 23622248 | validated |
| mirtarbase | hsa-miR-192-5p  | FAM222A  | 84915 | ENSG00000139438 | 19074876 | validated |
| mirtarbase | hsa-miR-106b-5p | PPP1R15B | 84919 | ENSG00000158615 | 24398324 | validated |
| mirtarbase | hsa-miR-301a-3p | PPP1R15B | 84919 | ENSG00000158615 | 24398324 | validated |
| mirtarbase | hsa-miR-582-5p  | PPP1R15B | 84919 | ENSG00000158615 | 23592263 | validated |

|         |                 |          |       |                 |          |           |
|---------|-----------------|----------|-------|-----------------|----------|-----------|
| mirbase | hsa-miR-192-5p  | ALG10    | 84920 | ENSG00000139133 | 19074876 | validated |
| mirbase | hsa-miR-18a-5p  | FAM104A  | 84923 | ENSG00000133193 | 23622248 | validated |
| mirbase | hsa-miR-106b-5p | MASTL    | 84930 | ENSG00000120539 | 22473208 | validated |
| mirbase | hsa-miR-301a-3p | MASTL    | 84930 | ENSG00000120539 | 23824327 | validated |
| mirbase | hsa-miR-181a-5p | RAB2B    | 84932 | ENSG00000129472 | 22473208 | validated |
| mirbase | hsa-miR-15b-5p  | ZNRF1    | 84937 | ENSG00000186187 | 23622248 | validated |
| mirbase | hsa-miR-106b-5p | WDR73    | 84942 | ENSG00000177082 | 23706177 | validated |
| mirbase | hsa-miR-192-5p  | SERAC1   | 84947 | ENSG00000122335 | 19074876 | validated |
| mirbase | hsa-miR-21-5p   | SERAC1   | 84947 | ENSG00000122335 | 18591254 | validated |
| mirbase | hsa-miR-192-5p  | PRPF38A  | 84950 | ENSG00000134748 | 19074876 | validated |
| mirbase | hsa-miR-582-3p  | PRPF38A  | 84950 | ENSG00000134748 | 23824327 | validated |
| mirbase | hsa-miR-301a-3p | PRPF38A  | 84950 | ENSG00000134748 | 27292025 | validated |
| mirbase | hsa-miR-192-5p  | CGNL1    | 84952 | ENSG00000128849 | 19074876 | validated |
| mirbase | hsa-miR-505-3p  | MICAL2   | 84953 | ENSG00000133816 | 23824327 | validated |
| mirbase | hsa-miR-15b-5p  | RELT     | 84957 | ENSG00000054967 | 22473208 | validated |
| mirbase | hsa-miR-192-5p  | UBASH3B  | 84959 | ENSG00000154127 | 19074876 | validated |
| mirbase | hsa-miR-15b-5p  | FBXL20   | 84961 | ENSG00000108306 | 21572407 | validated |
| mirbase | hsa-miR-326     | LSM10    | 84967 | ENSG00000181817 | 19536157 | validated |
| mirbase | hsa-miR-192-5p  | CEP19    | 84984 | ENSG00000174007 | 19074876 | validated |
| mirbase | hsa-miR-192-5p  | ARHGAP19 | 84986 | ENSG00000213390 | 19074876 | validated |
| mirbase | hsa-miR-192-5p  | USP45    | 85015 | ENSG00000123552 | 19074876 | validated |
| mirbase | hsa-miR-192-5p  | COL27A1  | 85301 | ENSG00000196739 | 17612493 | validated |
| mirbase | hsa-miR-326     | PAQR8    | 85315 | ENSG00000170915 | 23622248 | validated |
| mirbase | hsa-miR-106b-5p | BAGE5    | 85316 |                 | 22473208 | validated |
| mirbase | hsa-miR-15b-5p  | ZCCHC3   | 85364 | ENSG00000247315 | 24398324 | validated |
| mirbase | hsa-miR-21-5p   | ZCCHC3   | 85364 | ENSG00000247315 | 22473208 | validated |
| mirbase | hsa-miR-296-5p  | ZCCHC3   | 85364 | ENSG00000247315 | 26701625 | validated |
| mirbase | hsa-miR-326     | KIAA1671 | 85379 | ENSG00000197077 | 23622248 | validated |
| mirbase | hsa-miR-192-5p  | KIAA1671 | 85379 | ENSG00000197077 | 23622248 | validated |
| mirbase | hsa-miR-192-5p  | EAF1     | 85403 | ENSG00000144597 | 19074876 | validated |
| mirbase | hsa-miR-192-5p  | ZIC5     | 85416 | ENSG00000139800 | 19074876 | validated |
| mirbase | hsa-miR-301a-3p | ZIC5     | 85416 | ENSG00000139800 | 21572407 | validated |
| mirbase | hsa-miR-21-5p   | DOCK7    | 85440 | ENSG00000116641 | 22158624 | validated |
| mirbase | hsa-miR-192-5p  | LRRCC1   | 85444 | ENSG00000133739 | 19074876 | validated |
| mirbase | hsa-miR-106b-5p | UNK      | 85451 | ENSG00000132478 | 22012620 | validated |
| mirbase | hsa-miR-582-3p  | DIXDC1   | 85458 | ENSG00000150764 | 23295946 | validated |
| mirbase | hsa-miR-582-5p  | DIXDC1   | 85458 | ENSG00000150764 | 23295946 | validated |
| mirbase | hsa-miR-192-5p  | CEP295   | 85459 | ENSG00000166004 | 19074876 | validated |
| mirbase | hsa-miR-106b-5p | TANC1    | 85461 | ENSG00000115183 | 22473208 | validated |
| mirbase | hsa-miR-192-5p  | FHDC1    | 85462 | ENSG00000137460 | 19074876 | validated |
| mirbase | hsa-miR-106b-5p | FHDC1    | 85462 | ENSG00000137460 | 22012620 | validated |
| mirbase | hsa-miR-192-5p  | ZC3H12C  | 85463 | ENSG00000149289 | 19074876 | validated |
| mirbase | hsa-miR-106b-5p | ZC3H12C  | 85463 | ENSG00000149289 | 23446348 | validated |
| mirbase | hsa-miR-222-3p  | SSH2     | 85464 | ENSG00000141298 | 23622248 | validated |
| mirbase | hsa-miR-106b-5p | SSH2     | 85464 | ENSG00000141298 | 22473208 | validated |
| mirbase | hsa-miR-15b-5p  | SELENOI  | 85465 | ENSG00000138018 | 22473208 | validated |
| mirbase | hsa-miR-582-3p  | SELENOI  | 85465 | ENSG00000138018 | 23313552 | validated |
| mirbase | hsa-miR-192-5p  | ANKRD13A | 88455 | ENSG00000076513 | 19074876 | validated |
| mirbase | hsa-miR-505-3p  | TRIM4    | 89122 | ENSG00000146833 | 22012620 | validated |
| mirbase | hsa-miR-301a-3p | TRIM4    | 89122 | ENSG00000146833 | 21572407 | validated |
| mirbase | hsa-miR-181a-5p | WNT3A    | 89780 | ENSG00000154342 | 17612493 | validated |
| mirbase | hsa-miR-192-5p  | LMLN     | 89782 | ENSG00000185621 | 19074876 | validated |
| mirbase | hsa-miR-301a-3p | LMLN     | 89782 | ENSG00000185621 | 23446348 | validated |
| mirbase | hsa-miR-21-5p   | NAV3     | 89795 | ENSG00000067798 | 25579119 | validated |
| mirbase | hsa-miR-181a-5p | CHRFAM7A | 89832 | ENSG00000166664 | 17612493 | validated |
| mirbase | hsa-miR-21-5p   | KBTBD6   | 89890 | ENSG00000165572 | 18591254 | validated |
| mirbase | hsa-miR-505-3p  | KBTBD6   | 89890 | ENSG00000165572 | 23446348 | validated |
| mirbase | hsa-miR-301a-3p | KBTBD6   | 89890 | ENSG00000165572 | 19536157 | validated |
| mirbase | hsa-miR-15b-5p  | UBE3B    | 89910 | ENSG00000151148 | 23622248 | validated |
| mirbase | hsa-miR-301a-3p | BMERB1   | 89927 | ENSG00000278823 | 23824327 | validated |
| mirbase | hsa-miR-222-3p  | SAPCD2   | 89958 | ENSG00000186193 | 23622248 | validated |
| mirbase | hsa-miR-21-5p   | RSPRY1   | 89970 | ENSG00000159579 | 18591254 | validated |
| mirbase | hsa-miR-222-3p  | MIDN     | 90007 | ENSG00000167470 | 20371350 | validated |
| mirbase | hsa-miR-106b-5p | MIDN     | 90007 | ENSG00000167470 | 22473208 | validated |
| mirbase | hsa-miR-192-5p  | EFCAB11  | 90141 | ENSG00000140025 | 19074876 | validated |
| mirbase | hsa-miR-106b-5p | EFCAB11  | 90141 | ENSG00000140025 | 23446348 | validated |
| mirbase | hsa-miR-181a-5p | ZNF616   | 90317 | ENSG00000204611 | 20371350 | validated |
| mirbase | hsa-miR-192-5p  | C5orf30  | 90355 | ENSG00000181751 | 19074876 | validated |
| mirbase | hsa-miR-192-5p  | TICRR    | 90381 | ENSG00000140534 | 19074876 | validated |
| mirbase | hsa-miR-505-3p  | MCFD2    | 90411 | ENSG00000180398 | 23313552 | validated |
| mirbase | hsa-miR-15b-5p  | MCFD2    | 90411 | ENSG00000180398 | 23313552 | validated |

|            |                 |            |       |                 |          |           |
|------------|-----------------|------------|-------|-----------------|----------|-----------|
| mirtarbase | hsa-miR-222-3p  | KNSTRN     | 90417 | ENSG00000128944 | 23622248 | validated |
| mirtarbase | hsa-miR-222-3p  | BMF        | 90427 | ENSG00000104081 | 26370254 | validated |
| mirtarbase | hsa-miR-15b-5p  | ZNF622     | 90441 | ENSG00000173545 | 22473208 | validated |
| mirtarbase | hsa-miR-181a-5p | ZNF439     | 90594 | ENSG00000171291 | 21572407 | validated |
| mirtarbase | hsa-miR-192-5p  | LYRM7      | 90624 | ENSG00000186687 | 19074876 | validated |
| mirtarbase | hsa-miR-21-5p   | LYRM7      | 90624 | ENSG00000186687 | 18591254 | validated |
| mirtarbase | hsa-miR-301a-3p | STARD13    | 90627 | ENSG00000133121 | 24398324 | validated |
| mirtarbase | hsa-miR-106b-5p | COX19      | 90639 | ENSG00000240230 | 23446348 | validated |
| mirtarbase | hsa-miR-15b-5p  | PIP4P1     | 90809 | ENSG00000165782 | 22473208 | validated |
| mirtarbase | hsa-miR-106b-5p | ZNF598     | 90850 | ENSG00000167962 | 23622248 | validated |
| mirtarbase | hsa-miR-15b-5p  | JPT2       | 90861 | ENSG00000206053 | 27292025 | validated |
| mirtarbase | hsa-miR-106b-5p | TRIM41     | 90933 | ENSG00000146063 | 26701625 | validated |
| mirtarbase | hsa-miR-296-5p  | TRIM41     | 90933 | ENSG00000146063 | 26701625 | validated |
| mirtarbase | hsa-miR-106b-5p | FMNL3      | 91010 | ENSG00000161791 | 22473208 | validated |
| mirtarbase | hsa-miR-106b-5p | DPP9       | 91039 | ENSG00000142002 | 17242205 | validated |
| mirtarbase | hsa-miR-21-5p   | CCDC34     | 91057 | ENSG00000109881 | 18591254 | validated |
| mirtarbase | hsa-miR-106b-5p | ZNF682     | 91120 | ENSG00000197124 | 23446348 | validated |
| mirtarbase | hsa-miR-106b-5p | SLC25A46   | 91137 | ENSG00000164209 | 21572407 | validated |
| mirtarbase | hsa-miR-106b-5p | TMEM67     | 91147 | ENSG00000164953 | 22473208 | validated |
| mirtarbase | hsa-miR-181a-5p | C12orf29   | 91298 | ENSG00000133641 | 22815788 | validated |
| mirtarbase | hsa-miR-106b-5p | CDKN2AIPNL | 91368 | ENSG00000237190 | 23313552 | validated |
| mirtarbase | hsa-miR-15b-5p  | CDKN2AIPNL | 91368 | ENSG00000237190 | 22473208 | validated |
| mirtarbase | hsa-miR-21-5p   | SESTD1     | 91404 | ENSG00000187231 | 18591254 | validated |
| mirtarbase | hsa-miR-15b-5p  | SESTD1     | 91404 | ENSG00000187231 | 23446348 | validated |
| mirtarbase | hsa-miR-192-5p  | BTF3L4     | 91408 | ENSG00000134717 | 19074876 | validated |
| mirtarbase | hsa-miR-301a-3p | BTF3L4     | 91408 | ENSG00000134717 | 23592263 | validated |
| mirtarbase | hsa-miR-106b-5p | BTF3L4     | 91408 | ENSG00000134717 | 23446348 | validated |
| mirtarbase | hsa-miR-106b-5p | RCCD1      | 91433 | ENSG00000166965 | 23622248 | validated |
| mirtarbase | hsa-miR-106b-5p | FAAP24     | 91442 | ENSG00000131944 | 23313552 | validated |
| mirtarbase | hsa-miR-21-5p   | RNF185     | 91445 | ENSG00000138942 | 23592263 | validated |
| mirtarbase | hsa-miR-21-5p   | ACBD5      | 91452 | ENSG00000107897 | 20371350 | validated |
| mirtarbase | hsa-miR-106b-5p | ACBD5      | 91452 | ENSG00000107897 | 22473208 | validated |
| mirtarbase | hsa-miR-301a-3p | ACBD5      | 91452 | ENSG00000107897 | 21572407 | validated |
| mirtarbase | hsa-miR-192-5p  | C12orf65   | 91574 | ENSG00000130921 | 19074876 | validated |
| mirtarbase | hsa-miR-222-3p  | C12orf65   | 91574 | ENSG00000130921 | 23622248 | validated |
| mirtarbase | hsa-miR-106b-5p | C12orf65   | 91574 | ENSG00000130921 | 23313552 | validated |
| mirtarbase | hsa-miR-222-3p  | SLFN11     | 91607 | ENSG00000172716 | 23622248 | validated |
| mirtarbase | hsa-miR-106b-5p | CHURC1     | 91612 | ENSG00000258289 | 22473208 | validated |
| mirtarbase | hsa-miR-21-5p   | BOC        | 91653 | ENSG00000144857 | 18591254 | validated |
| mirtarbase | hsa-miR-505-3p  | ZNF845     | 91664 | ENSG00000213799 | 23313552 | validated |
| mirtarbase | hsa-miR-15b-5p  | SMDT1      | 91689 | ENSG00000272835 | 20371350 | validated |
| mirtarbase | hsa-miR-301a-3p | LONRF1     | 91694 | ENSG00000154359 | 23622248 | validated |
| mirtarbase | hsa-miR-181a-5p | LONRF1     | 91694 | ENSG00000154359 | 22473208 | validated |
| mirtarbase | hsa-miR-15b-5p  | YTHDC1     | 91746 | ENSG00000275272 | 23446348 | validated |
| mirtarbase | hsa-miR-106b-5p | YTHDC1     | 91746 | ENSG00000275272 | 19536157 | validated |
| mirtarbase | hsa-miR-106b-5p | ELMSAN1    | 91748 | ENSG00000156030 | 22473208 | validated |
| mirtarbase | hsa-miR-181a-5p | ELMSAN1    | 91748 | ENSG00000156030 | 22473208 | validated |
| mirtarbase | hsa-miR-192-5p  | NEK9       | 91754 | ENSG00000119638 | 23824327 | validated |
| mirtarbase | hsa-miR-106b-5p | CABLES1    | 91768 | ENSG00000134508 | 23592263 | validated |
| mirtarbase | hsa-miR-15b-5p  | CHMP7      | 91782 | ENSG00000147457 | 23622248 | validated |
| mirtarbase | hsa-miR-106b-5p | MYLK3      | 91807 | ENSG00000140795 | 23313552 | validated |
| mirtarbase | hsa-miR-301a-3p | RFT1       | 91869 | ENSG00000163933 | 23446348 | validated |
| mirtarbase | hsa-miR-21-5p   | FDXACB1    | 91893 | ENSG00000255561 | 27292025 | validated |
| mirtarbase | hsa-miR-181a-5p | CCNQ       | 92002 | ENSG00000262919 | 22473208 | validated |
| mirtarbase | hsa-miR-192-5p  | SLC25A51   | 92014 | ENSG00000122696 | 19074876 | validated |
| mirtarbase | hsa-miR-222-3p  | SLC25A51   | 92014 | ENSG00000122696 | 23622248 | validated |
| mirtarbase | hsa-miR-181a-5p | ZC3HAV1L   | 92092 | ENSG00000146858 | 23824327 | validated |
| mirtarbase | hsa-miR-192-5p  | MTDH       | 92140 | ENSG00000147649 | 19074876 | validated |
| mirtarbase | hsa-miR-296-5p  | MTSS2      | 92154 | ENSG00000132613 | 23592263 | validated |
| mirtarbase | hsa-miR-18a-5p  | UBTD2      | 92181 | ENSG00000168246 | 20371350 | validated |
| mirtarbase | hsa-miR-18a-5p  | ZNF585B    | 92285 | ENSG00000245680 | 22012620 | validated |
| mirtarbase | hsa-miR-15b-5p  | ZNF585B    | 92285 | ENSG00000245680 | 21572407 | validated |
| mirtarbase | hsa-miR-301a-3p | ASB16      | 92591 | ENSG00000161664 | 21572407 | validated |
| mirtarbase | hsa-miR-106b-5p | ASB16      | 92591 | ENSG00000161664 | 23313552 | validated |
| mirtarbase | hsa-miR-181a-5p | MOB1B      | 92597 | ENSG00000173542 | 20371350 | validated |
| mirtarbase | hsa-miR-222-3p  | TIMM50     | 92609 | ENSG00000105197 | 23622248 | validated |
| mirtarbase | hsa-miR-18a-5p  | TIMM50     | 92609 | ENSG00000105197 | 26701625 | validated |
| mirtarbase | hsa-miR-301a-3p | TIMM50     | 92609 | ENSG00000105197 | 27292025 | validated |
| mirtarbase | hsa-miR-192-5p  | TIFA       | 92610 | ENSG00000145365 | 19074876 | validated |
| mirtarbase | hsa-miR-301a-3p | FAM114A1   | 92689 | ENSG00000197712 | 19536157 | validated |
| mirtarbase | hsa-miR-192-5p  | TMEM169    | 92691 | ENSG00000163449 | 19074876 | validated |

|            |                 |            |        |                 |          |           |
|------------|-----------------|------------|--------|-----------------|----------|-----------|
| mirTarbase | hsa-miR-326     | ARRDC1     | 92714  | ENSG00000197070 | 23622248 | validated |
| mirTarbase | hsa-miR-106b-5p | UBE2Q2     | 92912  | ENSG00000140367 | 22473208 | validated |
| mirTarbase | hsa-miR-15b-5p  | UBE2Q2     | 92912  | ENSG00000140367 | 22473208 | validated |
| mirTarbase | hsa-miR-21-5p   | ZBTB47     | 92999  | ENSG00000114853 | 18591254 | validated |
| mirTarbase | hsa-miR-18a-5p  | ZBTB47     | 92999  | ENSG00000114853 | 23446348 | validated |
| mirTarbase | hsa-miR-192-5p  | TEX30      | 93081  | ENSG00000151287 | 19074876 | validated |
| mirTarbase | hsa-miR-18a-5p  | ORAI3      | 93129  | ENSG00000175938 | 23622248 | validated |
| mirTarbase | hsa-miR-192-5p  | PIGM       | 93183  | ENSG00000143315 | 20371350 | validated |
| mirTarbase | hsa-miR-222-3p  | HAUS8      | 93323  | ENSG00000131351 | 23622248 | validated |
| mirTarbase | hsa-miR-106b-5p | HAUS8      | 93323  | ENSG00000131351 | 22473208 | validated |
| mirTarbase | hsa-miR-301a-3p | MMGT1      | 93380  | ENSG00000169446 | 23592263 | validated |
| mirTarbase | hsa-miR-18a-5p  | ZNF670     | 93474  | ENSG00000277462 | 20371350 | validated |
| mirTarbase | hsa-miR-181a-5p | MAPK1IP1L  | 93487  | ENSG00000168175 | 22942087 | validated |
| mirTarbase | hsa-miR-192-5p  | TBC1D31    | 93594  | ENSG00000156787 | 19074876 | validated |
| mirTarbase | hsa-miR-15b-5p  | TADA2B     | 93624  | ENSG00000173011 | 22473208 | validated |
| mirTarbase | hsa-miR-106b-5p | TADA2B     | 93624  | ENSG00000173011 | 22473208 | validated |
| mirTarbase | hsa-miR-212-3p  | TJAP1      | 93643  | ENSG00000137221 | 21572407 | validated |
| mirTarbase | hsa-miR-192-5p  | CADPS2     | 93664  | ENSG00000081803 | 19074876 | validated |
| mirTarbase | hsa-miR-181a-5p | CADPS2     | 93664  | ENSG00000081803 | 27292025 | validated |
| mirTarbase | hsa-miR-192-5p  | TTYH2      | 94015  | ENSG00000141540 | 27292025 | validated |
| mirTarbase | hsa-miR-106b-5p | CAMK2N2    | 94032  | ENSG00000163888 | 22473208 | validated |
| mirTarbase | hsa-miR-582-3p  | LENG9      | 94059  | ENSG00000273574 | 23824327 | validated |
| mirTarbase | hsa-miR-21-5p   | SFXN1      | 94081  | ENSG00000164466 | 18591254 | validated |
| mirTarbase | hsa-miR-106b-5p | ORMDL3     | 94103  | ENSG00000172057 | 22473208 | validated |
| mirTarbase | hsa-miR-181a-5p | ARHGAP12   | 94134  | ENSG00000165322 | 20371350 | validated |
| mirTarbase | hsa-miR-106b-5p | ARHGAP12   | 94134  | ENSG00000165322 | 22473208 | validated |
| mirTarbase | hsa-miR-301a-3p | ARHGAP12   | 94134  | ENSG00000165322 | 21572407 | validated |
| mirTarbase | hsa-miR-15b-5p  | ARHGAP12   | 94134  | ENSG00000165322 | 22473208 | validated |
| mirTarbase | hsa-miR-301a-3p | FOXQ1      | 94234  | ENSG00000164379 | 23592263 | validated |
| mirTarbase | hsa-miR-106b-5p | FOXQ1      | 94234  | ENSG00000164379 | 23592263 | validated |
| mirTarbase | hsa-miR-106b-5p | TP53INP1   | 94241  | ENSG00000164938 | 22100165 | validated |
| mirTarbase | hsa-miR-582-3p  | MYL12B     | 103910 | ENSG00000118680 | 20371350 | validated |
| mirTarbase | hsa-miR-106b-5p | EGLN3      | 112399 | ENSG00000129521 | 21572407 | validated |
| mirTarbase | hsa-miR-301a-3p | EGLN3      | 112399 | ENSG00000129521 | 21572407 | validated |
| mirTarbase | hsa-miR-21-5p   | MRAP2      | 112609 | ENSG00000135324 | 18591254 | validated |
| mirTarbase | hsa-miR-192-5p  | FAM71E1    | 112703 | ENSG00000142530 | 19074876 | validated |
| mirTarbase | hsa-miR-106b-5p | WDR89      | 112840 | ENSG00000140006 | 22473208 | validated |
| mirTarbase | hsa-miR-582-5p  | NACC1      | 112939 | ENSG00000160877 | 23592263 | validated |
| mirTarbase | hsa-miR-144-3p  | NACC1      | 112939 | ENSG00000160877 | 23592263 | validated |
| mirTarbase | hsa-miR-18a-5p  | NACC1      | 112939 | ENSG00000160877 | 23592263 | validated |
| mirTarbase | hsa-miR-301a-3p | MED8       | 112950 | ENSG00000159479 | 19536157 | validated |
| mirTarbase | hsa-miR-18a-5p  | CDCA5      | 113130 | ENSG00000146670 | 23622248 | validated |
| mirTarbase | hsa-miR-15b-5p  | AHNAK2     | 113146 | ENSG00000185567 | 20371350 | validated |
| mirTarbase | hsa-miR-15b-5p  | SCAMP4     | 113178 | ENSG00000227500 | 20371350 | validated |
| mirTarbase | hsa-miR-301a-3p | SLC46A1    | 113235 | ENSG00000076351 | 23446348 | validated |
| mirTarbase | hsa-miR-192-5p  | GLCCI1     | 113263 | ENSG00000106415 | 19074876 | validated |
| mirTarbase | hsa-miR-192-5p  | TMEM106A   | 113277 | ENSG00000184988 | 19074876 | validated |
| mirTarbase | hsa-miR-106b-5p | SLC52A3    | 113278 | ENSG00000101276 | 23622248 | validated |
| mirTarbase | hsa-miR-15b-5p  | SFT2D1     | 113402 | ENSG00000198818 | 23622248 | validated |
| mirTarbase | hsa-miR-15b-5p  | MCM3AP-AS1 | 114044 | ENSG00000215424 | 22473208 | validated |
| mirTarbase | hsa-miR-181a-5p | SLC25A25   | 114789 | ENSG00000148339 | 23592263 | validated |
| mirTarbase | hsa-miR-106b-5p | STK11IP    | 114790 | ENSG00000144589 | 21572407 | validated |
| mirTarbase | hsa-miR-21-5p   | TUBGCP5    | 114791 | ENSG00000275835 | 18591254 | validated |
| mirTarbase | hsa-miR-106b-5p | FMNL2      | 114793 | ENSG00000157827 | 21572407 | validated |
| mirTarbase | hsa-miR-181a-5p | TMEM132B   | 114795 | ENSG00000139364 | 20371350 | validated |
| mirTarbase | hsa-miR-505-3p  | TMEM132B   | 114795 | ENSG00000139364 | 23824327 | validated |
| mirTarbase | hsa-miR-192-5p  | TMEM200A   | 114801 | ENSG00000164484 | 19074876 | validated |
| mirTarbase | hsa-miR-18a-5p  | RNF157     | 114804 | ENSG00000141576 | 23622248 | validated |
| mirTarbase | hsa-miR-21-5p   | OSBPL1A    | 114876 | ENSG00000141447 | 18591254 | validated |
| mirTarbase | hsa-miR-192-5p  | OSBPL6     | 114880 | ENSG00000079156 | 19074876 | validated |
| mirTarbase | hsa-miR-192-5p  | OSBPL8     | 114882 | ENSG00000091039 | 19074876 | validated |
| mirTarbase | hsa-miR-192-5p  | OSBPL10    | 114884 | ENSG00000144645 | 19074876 | validated |
| mirTarbase | hsa-miR-222-3p  | OSBPL10    | 114884 | ENSG00000144645 | 23622248 | validated |
| mirTarbase | hsa-miR-192-5p  | C1QTNF3    | 114899 | ENSG00000082196 | 19074876 | validated |
| mirTarbase | hsa-miR-106b-5p | TMEM123    | 114908 | ENSG00000152558 | 22473208 | validated |
| mirTarbase | hsa-miR-301a-3p | FLYWCH2    | 114984 | ENSG00000162076 | 23824327 | validated |
| mirTarbase | hsa-miR-301a-3p | WDR31      | 114987 | ENSG00000148225 | 23824327 | validated |
| mirTarbase | hsa-miR-192-5p  | ATG4A      | 115201 | ENSG00000101844 | 19074876 | validated |
| mirTarbase | hsa-miR-192-5p  | KCTD12     | 115207 | ENSG00000178695 | 19074876 | validated |
| mirTarbase | hsa-miR-296-5p  | KCTD12     | 115207 | ENSG00000178695 | 23446348 | validated |
| mirTarbase | hsa-miR-106b-5p | RAB42      | 115273 | ENSG00000188060 | 23706177 | validated |

|            |                 |          |        |                 |          |           |
|------------|-----------------|----------|--------|-----------------|----------|-----------|
| mirtarbase | hsa-miR-106b-5p | PCMTD1   | 115294 | ENSG00000168300 | 22473208 | validated |
| mirtarbase | hsa-miR-222-3p  | UHRF2    | 115426 | ENSG00000147854 | 23622248 | validated |
| mirtarbase | hsa-miR-326     | ZNF689   | 115509 | ENSG00000156853 | 23622248 | validated |
| mirtarbase | hsa-miR-106b-5p | FCHO2    | 115548 | ENSG00000157107 | 22473208 | validated |
| mirtarbase | hsa-miR-192-5p  | DIS3L    | 115752 | ENSG00000166938 | 19074876 | validated |
| mirtarbase | hsa-miR-106b-5p | DIS3L    | 115752 | ENSG00000166938 | 21572407 | validated |
| mirtarbase | hsa-miR-192-5p  | LRRRC58  | 116064 | ENSG00000163428 | 19074876 | validated |
| mirtarbase | hsa-miR-106b-5p | LRRRC58  | 116064 | ENSG00000163428 | 27418678 | validated |
| mirtarbase | hsa-miR-181a-5p | LYSMD3   | 116068 | ENSG00000176018 | 17612493 | validated |
| mirtarbase | hsa-miR-192-5p  | LYSMD3   | 116068 | ENSG00000176018 | 19074876 | validated |
| mirtarbase | hsa-miR-106b-5p | LYSMD3   | 116068 | ENSG00000176018 | 22473208 | validated |
| mirtarbase | hsa-miR-144-3p  | LYSMD3   | 116068 | ENSG00000176018 | 23592263 | validated |
| mirtarbase | hsa-miR-106b-5p | WDR92    | 116143 | ENSG00000243667 | 27418678 | validated |
| mirtarbase | hsa-miR-301a-3p | NUS1     | 116150 | ENSG00000153989 | 22291592 | validated |
| mirtarbase | hsa-miR-144-3p  | NUS1     | 116150 | ENSG00000153989 | 23592263 | validated |
| mirtarbase | hsa-miR-21-5p   | COX20    | 116228 | ENSG00000203667 | 23446348 | validated |
| mirtarbase | hsa-miR-301a-3p | COX20    | 116228 | ENSG00000203667 | 22012620 | validated |
| mirtarbase | hsa-miR-106b-5p | ABHD15   | 116236 | ENSG00000168792 | 22012620 | validated |
| mirtarbase | hsa-miR-192-5p  | GINM1    | 116254 | ENSG00000055211 | 19074876 | validated |
| mirtarbase | hsa-miR-192-5p  | RBP7     | 116362 | ENSG00000162444 | 19074876 | validated |
| mirtarbase | hsa-miR-144-3p  | RAB39B   | 116442 | ENSG00000155961 | 21572407 | validated |
| mirtarbase | hsa-miR-106b-5p | NIBAN1   | 116496 | ENSG00000135842 | 22473208 | validated |
| mirtarbase | hsa-miR-106b-5p | SNAP47   | 116841 | ENSG00000143740 | 20371350 | validated |
| mirtarbase | hsa-miR-192-5p  | LEAP2    | 116842 | ENSG00000164406 | 19074876 | validated |
| mirtarbase | hsa-miR-18a-5p  | ACAP3    | 116983 | ENSG00000131584 | 23622248 | validated |
| mirtarbase | hsa-miR-106b-5p | ARAP2    | 116984 | ENSG00000047365 | 22473208 | validated |
| mirtarbase | hsa-miR-582-5p  | ARAP2    | 116984 | ENSG00000047365 | 23592263 | validated |
| mirtarbase | hsa-miR-144-3p  | ARAP2    | 116984 | ENSG00000047365 | 23592263 | validated |
| mirtarbase | hsa-miR-106b-5p | THEM4    | 117145 | ENSG00000159445 | 23313552 | validated |
| mirtarbase | hsa-miR-15b-5p  | RAB3IP   | 117177 | ENSG00000127328 | 20371350 | validated |
| mirtarbase | hsa-miR-106b-5p | RAB3IP   | 117177 | ENSG00000127328 | 26701625 | validated |
| mirtarbase | hsa-miR-222-3p  | SSX2IP   | 117178 | ENSG00000117155 | 23776679 | validated |
| mirtarbase | hsa-miR-106b-5p | SSX2IP   | 117178 | ENSG00000117155 | 22473208 | validated |
| mirtarbase | hsa-miR-181a-5p | SSX2IP   | 117178 | ENSG00000117155 | 22473208 | validated |
| mirtarbase | hsa-miR-21-5p   | RFFL     | 117584 | ENSG00000092871 | 22815788 | validated |
| mirtarbase | hsa-miR-301a-3p | ZNF354B  | 117608 | ENSG00000178338 | 23446348 | validated |
| mirtarbase | hsa-miR-106b-5p | ZNF354B  | 117608 | ENSG00000178338 | 20371350 | validated |
| mirtarbase | hsa-miR-181a-5p | PRAP1    | 118471 | ENSG00000165828 | 21779487 | validated |
| mirtarbase | hsa-miR-505-3p  | ZNF511   | 118472 | ENSG00000198546 | 23622248 | validated |
| mirtarbase | hsa-miR-106b-5p | PIK3AP1  | 118788 | ENSG00000155629 | 23622248 | validated |
| mirtarbase | hsa-miR-181a-5p | FRA10AC1 | 118924 | ENSG00000148690 | 17612493 | validated |
| mirtarbase | hsa-miR-192-5p  | SFR1     | 119392 | ENSG00000156384 | 19074876 | validated |
| mirtarbase | hsa-miR-144-3p  | SFXN4    | 119559 | ENSG00000183605 | 23592263 | validated |
| mirtarbase | hsa-miR-582-3p  | LRRK2    | 120892 | ENSG00000188906 | 23295946 | validated |
| mirtarbase | hsa-miR-582-5p  | LRRK2    | 120892 | ENSG00000188906 | 23295946 | validated |
| mirtarbase | hsa-miR-18a-5p  | LRIG3    | 121227 | ENSG00000139263 | 23622248 | validated |
| mirtarbase | hsa-miR-192-5p  | ZNF641   | 121274 | ENSG00000167528 | 19074876 | validated |
| mirtarbase | hsa-miR-192-5p  | NEDD1    | 121441 | ENSG00000139350 | 19074876 | validated |
| mirtarbase | hsa-miR-21-5p   | SPPL3    | 121665 | ENSG00000157837 | 22473208 | validated |
| mirtarbase | hsa-miR-301a-3p | ANKRD9   | 122416 | ENSG00000156381 | 23824327 | validated |
| mirtarbase | hsa-miR-106b-5p | C14orf28 | 122525 | ENSG00000179476 | 22473208 | validated |
| mirtarbase | hsa-miR-301a-3p | MRPL52   | 122704 | ENSG00000172590 | 23592263 | validated |
| mirtarbase | hsa-miR-106b-5p | FRMD6    | 122786 | ENSG00000139926 | 22473208 | validated |
| mirtarbase | hsa-miR-21-5p   | SOCS4    | 122809 | ENSG00000180008 | 18591254 | validated |
| mirtarbase | hsa-miR-21-5p   | NAA30    | 122830 | ENSG00000139977 | 18591254 | validated |
| mirtarbase | hsa-miR-15b-5p  | NAA30    | 122830 | ENSG00000139977 | 23622248 | validated |
| mirtarbase | hsa-miR-144-3p  | NAA30    | 122830 | ENSG00000139977 | 21572407 | validated |
| mirtarbase | hsa-miR-326     | NAA30    | 122830 | ENSG00000139977 | 23313552 | validated |
| mirtarbase | hsa-miR-106b-5p | ISCA2    | 122961 | ENSG00000165898 | 23313552 | validated |
| mirtarbase | hsa-miR-15b-5p  | SLC25A29 | 123096 | ENSG00000197119 | 22473208 | validated |
| mirtarbase | hsa-miR-106b-5p | C15orf40 | 123207 | ENSG00000169609 | 23824327 | validated |
| mirtarbase | hsa-miR-296-5p  | MTFMT    | 123263 | ENSG00000103707 | 23592263 | validated |
| mirtarbase | hsa-miR-192-5p  | NIPA1    | 123606 | ENSG00000170113 | 19074876 | validated |
| mirtarbase | hsa-miR-106b-5p | NIPA1    | 123606 | ENSG00000170113 | 22473208 | validated |
| mirtarbase | hsa-miR-301a-3p | NIPA1    | 123606 | ENSG00000170113 | 23446348 | validated |
| mirtarbase | hsa-miR-582-3p  | FSD2     | 123722 | ENSG00000186628 | 27418678 | validated |
| mirtarbase | hsa-miR-192-5p  | C16orf46 | 123775 | ENSG00000166455 | 19074876 | validated |
| mirtarbase | hsa-miR-18a-5p  | DCUN1D3  | 123879 | ENSG00000188215 | 20371350 | validated |
| mirtarbase | hsa-miR-301a-3p | DCUN1D3  | 123879 | ENSG00000188215 | 20371350 | validated |
| mirtarbase | hsa-miR-192-5p  | NOXO1    | 124056 | ENSG00000196408 | 19074876 | validated |
| mirtarbase | hsa-miR-106b-5p | ZC3H18   | 124245 | ENSG00000158545 | 23622248 | validated |



|            |                 |           |        |                 |          |           |
|------------|-----------------|-----------|--------|-----------------|----------|-----------|
| mirtarbase | hsa-miR-18a-5p  | ZC3H18    | 124245 | ENSG00000158545 | 23622248 | validated |
| mirtarbase | hsa-miR-21-5p   | TMEM170A  | 124491 | ENSG00000166822 | 21572407 | validated |
| mirtarbase | hsa-miR-326     | USH1G     | 124590 | ENSG00000182040 | 24398324 | validated |
| mirtarbase | hsa-miR-301a-3p | CYB5D1    | 124637 | ENSG00000182224 | 23824327 | validated |
| mirtarbase | hsa-miR-326     | SEZ6      | 124925 | ENSG00000063015 | 27418678 | validated |
| mirtarbase | hsa-miR-505-3p  | ANKRD13B  | 124930 | ENSG00000198720 | 23622248 | validated |
| mirtarbase | hsa-miR-15b-5p  | ANKRD13B  | 124930 | ENSG00000198720 | 22473208 | validated |
| mirtarbase | hsa-miR-505-3p  | GJD3      | 125111 | ENSG00000183153 | 21572407 | validated |
| mirtarbase | hsa-miR-106b-5p | FAM210A   | 125228 | ENSG00000177150 | 22473208 | validated |
| mirtarbase | hsa-miR-192-5p  | KRT18P8   | 125242 |                 | 19074876 | validated |
| mirtarbase | hsa-miR-15b-5p  | OSCAR     | 126014 | ENSG00000275736 | 21572407 | validated |
| mirtarbase | hsa-miR-296-5p  | OSCAR     | 126014 | ENSG00000275736 | 23313552 | validated |
| mirtarbase | hsa-miR-181a-5p | ZNF440    | 126070 | ENSG00000171295 | 23446348 | validated |
| mirtarbase | hsa-miR-106b-5p | TNFAIP8L1 | 126282 | ENSG00000185361 | 22012620 | validated |
| mirtarbase | hsa-miR-18a-5p  | IRGQ      | 126298 | ENSG00000167378 | 23622248 | validated |
| mirtarbase | hsa-miR-192-5p  | GABPB2    | 126626 | ENSG00000143458 | 19074876 | validated |
| mirtarbase | hsa-miR-326     | RPTN      | 126638 | ENSG00000215853 | 19536157 | validated |
| mirtarbase | hsa-miR-192-5p  | CCSAP     | 126731 | ENSG00000154429 | 19074876 | validated |
| mirtarbase | hsa-miR-21-5p   | TPRG1L    | 127262 | ENSG00000158109 | 18591254 | validated |
| mirtarbase | hsa-miR-106b-5p | TPRG1L    | 127262 | ENSG00000158109 | 22473208 | validated |
| mirtarbase | hsa-miR-505-3p  | TPRG1L    | 127262 | ENSG00000158109 | 21572407 | validated |
| mirtarbase | hsa-miR-21-5p   | TCEANC2   | 127428 | ENSG00000116205 | 23824327 | validated |
| mirtarbase | hsa-miR-106b-5p | RNF19B    | 127544 | ENSG00000116514 | 23313552 | validated |
| mirtarbase | hsa-miR-296-5p  | ARL8A     | 127829 | ENSG00000143862 | 23592263 | validated |
| mirtarbase | hsa-miR-296-5p  | SYT2      | 127833 | ENSG00000143858 | 23592263 | validated |
| mirtarbase | hsa-miR-15b-5p  | TBC1D20   | 128637 | ENSG00000125875 | 22473208 | validated |
| mirtarbase | hsa-miR-15b-5p  | CHMP4B    | 128866 | ENSG00000101421 | 20371350 | validated |
| mirtarbase | hsa-miR-106b-5p | NUP35     | 129401 | ENSG00000163002 | 22473208 | validated |
| mirtarbase | hsa-miR-106b-5p | XIRP2     | 129446 | ENSG00000163092 | 22012620 | validated |
| mirtarbase | hsa-miR-505-3p  | TYW5      | 129450 | ENSG00000162971 | 23824327 | validated |
| mirtarbase | hsa-miR-192-5p  | CMPK2     | 129607 | ENSG00000134326 | 19074876 | validated |
| mirtarbase | hsa-miR-106b-5p | ICA1L     | 130026 | ENSG00000163596 | 23824327 | validated |
| mirtarbase | hsa-miR-21-5p   | OSR1      | 130497 | ENSG00000143867 | 18591254 | validated |
| mirtarbase | hsa-miR-21-5p   | UBR3      | 130507 | ENSG00000144357 | 18591254 | validated |
| mirtarbase | hsa-miR-15b-5p  | UBR3      | 130507 | ENSG00000144357 | 21572407 | validated |
| mirtarbase | hsa-miR-192-5p  | LYPD6     | 130574 | ENSG00000187123 | 19074876 | validated |
| mirtarbase | hsa-miR-192-5p  | AHSA2     | 130872 |                 | 19074876 | validated |
| mirtarbase | hsa-miR-21-5p   | AHSA2     | 130872 |                 | 18591254 | validated |
| mirtarbase | hsa-miR-192-5p  | FBXO36    | 130888 | ENSG00000153832 | 19074876 | validated |
| mirtarbase | hsa-miR-192-5p  | DNAJC19   | 131118 | ENSG00000205981 | 19074876 | validated |
| mirtarbase | hsa-miR-15b-5p  | KLHL40    | 131377 | ENSG00000157119 | 23824327 | validated |
| mirtarbase | hsa-miR-301a-3p | TRIM71    | 131405 | ENSG00000206557 | 22012620 | validated |
| mirtarbase | hsa-miR-296-5p  | CHCHD4    | 131474 | ENSG00000163528 | 19536157 | validated |
| mirtarbase | hsa-miR-192-5p  | CRYBG3    | 131544 | ENSG00000080200 | 22100165 | validated |
| mirtarbase | hsa-miR-192-5p  | DCBLD2    | 131566 | ENSG00000057019 | 19074876 | validated |
| mirtarbase | hsa-miR-106b-5p | DCBLD2    | 131566 | ENSG00000057019 | 26701625 | validated |
| mirtarbase | hsa-miR-144-3p  | DCBLD2    | 131566 | ENSG00000057019 | 26701625 | validated |
| mirtarbase | hsa-miR-181a-5p | DCBLD2    | 131566 | ENSG00000057019 | 26701625 | validated |
| mirtarbase | hsa-miR-301a-3p | DCBLD2    | 131566 | ENSG00000057019 | 26701625 | validated |
| mirtarbase | hsa-miR-505-3p  | NUDT16    | 131870 | ENSG00000198585 | 23824327 | validated |
| mirtarbase | hsa-miR-106b-5p | GRK7      | 131890 | ENSG00000114124 | 23446348 | validated |
| mirtarbase | hsa-miR-18a-5p  | LIN54     | 132660 | ENSG00000189308 | 23446348 | validated |
| mirtarbase | hsa-miR-192-5p  | FAM241A   | 132720 | ENSG00000174749 | 19074876 | validated |
| mirtarbase | hsa-miR-106b-5p | FAM241A   | 132720 | ENSG00000174749 | 27418678 | validated |
| mirtarbase | hsa-miR-106b-5p | GNPDA2    | 132789 | ENSG00000163281 | 17242205 | validated |
| mirtarbase | hsa-miR-15b-5p  | CPEB2     | 132864 | ENSG00000137449 | 22473208 | validated |
| mirtarbase | hsa-miR-301a-3p | C4orf36   | 132989 | ENSG00000163633 | 23824327 | validated |
| mirtarbase | hsa-miR-192-5p  | EMB       | 133418 | ENSG00000170571 | 19074876 | validated |
| mirtarbase | hsa-miR-192-5p  | PRRC1     | 133619 | ENSG00000164244 | 19074876 | validated |
| mirtarbase | hsa-miR-21-5p   | PRRC1     | 133619 | ENSG00000164244 | 18591254 | validated |
| mirtarbase | hsa-miR-181a-5p | UGT3A1    | 133688 | ENSG00000145626 | 17612493 | validated |
| mirtarbase | hsa-miR-301a-3p | JMY       | 133746 | ENSG00000152409 | 21572407 | validated |
| mirtarbase | hsa-miR-144-3p  | JMY       | 133746 | ENSG00000152409 | 23592263 | validated |
| mirtarbase | hsa-miR-18a-5p  | JMY       | 133746 | ENSG00000152409 | 23824327 | validated |
| mirtarbase | hsa-miR-18a-5p  | ATPCKMT   | 134145 | ENSG00000150756 | 23622248 | validated |
| mirtarbase | hsa-miR-192-5p  | AFAP1L1   | 134265 | ENSG00000157510 | 19074876 | validated |
| mirtarbase | hsa-miR-21-5p   | GRPEL2    | 134266 | ENSG00000164284 | 20371350 | validated |
| mirtarbase | hsa-miR-106b-5p | GRPEL2    | 134266 | ENSG00000164284 | 22473208 | validated |
| mirtarbase | hsa-miR-582-3p  | GRPEL2    | 134266 | ENSG00000164284 | 20371350 | validated |
| mirtarbase | hsa-miR-15b-5p  | LSM11     | 134353 | ENSG00000155858 | 22473208 | validated |
| mirtarbase | hsa-miR-181a-5p | ACOT12    | 134526 | ENSG00000172497 | 17612493 | validated |

|            |                 |           |        |                 |          |           |
|------------|-----------------|-----------|--------|-----------------|----------|-----------|
| mirTarbase | hsa-miR-106b-5p | ADAT2     | 134637 | ENSG00000189007 | 22012620 | validated |
| mirTarbase | hsa-miR-181a-5p | IRAK1BP1  | 134728 | ENSG00000146243 | 20371350 | validated |
| mirTarbase | hsa-miR-15b-5p  | IRAK1BP1  | 134728 | ENSG00000146243 | 22473208 | validated |
| mirTarbase | hsa-miR-21-5p   | STXBP5    | 134957 | ENSG00000164506 | 20048743 | validated |
| mirTarbase | hsa-miR-181a-5p | NCOA7     | 135112 | ENSG00000111912 | 21572407 | validated |
| mirTarbase | hsa-miR-192-5p  | HINT3     | 135114 | ENSG00000111911 | 19074876 | validated |
| mirTarbase | hsa-miR-21-5p   | PM20D2    | 135293 | ENSG00000146281 | 18591254 | validated |
| mirTarbase | hsa-miR-106b-5p | ZNF786    | 136051 | ENSG00000197362 | 27418678 | validated |
| mirTarbase | hsa-miR-21-5p   | MTPN      | 136319 | ENSG00000105887 | 18591254 | validated |
| mirTarbase | hsa-miR-301a-3p | MTPN      | 136319 | ENSG00000105887 | 23446348 | validated |
| mirTarbase | hsa-miR-222-3p  | CLDN23    | 137075 | ENSG00000253958 | 23622248 | validated |
| mirTarbase | hsa-miR-18a-5p  | VPS37A    | 137492 | ENSG00000155975 | 23622248 | validated |
| mirTarbase | hsa-miR-301a-3p | VPS37A    | 137492 | ENSG00000155975 | 21572407 | validated |
| mirTarbase | hsa-miR-106b-5p | NACC2     | 138151 | ENSG00000148411 | 23446348 | validated |
| mirTarbase | hsa-miR-301a-3p | NACC2     | 138151 | ENSG00000148411 | 23446348 | validated |
| mirTarbase | hsa-miR-582-5p  | CARNMT1   | 138199 | ENSG00000156017 | 23592263 | validated |
| mirTarbase | hsa-miR-21-5p   | PTPDC1    | 138639 | ENSG00000158079 | 18591254 | validated |
| mirTarbase | hsa-miR-106b-5p | PTPDC1    | 138639 | ENSG00000158079 | 21572407 | validated |
| mirTarbase | hsa-miR-181a-5p | PTPDC1    | 138639 | ENSG00000158079 | 21572407 | validated |
| mirTarbase | hsa-miR-192-5p  | FAM199X   | 139231 | ENSG00000123575 | 19074876 | validated |
| mirTarbase | hsa-miR-106b-5p | FAM199X   | 139231 | ENSG00000123575 | 23622248 | validated |
| mirTarbase | hsa-miR-106b-5p | AMER1     | 139285 | ENSG00000184675 | 22473208 | validated |
| mirTarbase | hsa-miR-18a-5p  | PTCHD1    | 139411 | ENSG00000165186 | 22100165 | validated |
| mirTarbase | hsa-miR-15b-5p  | DOCK11    | 139818 | ENSG00000147251 | 23592263 | validated |
| mirTarbase | hsa-miR-192-5p  | SPIN4     | 139886 | ENSG00000186767 | 19074876 | validated |
| mirTarbase | hsa-miR-15b-5p  | ZFP28     | 140612 | ENSG00000196867 | 20371350 | validated |
| mirTarbase | hsa-miR-15b-5p  | NOL4L     | 140688 | ENSG00000197183 | 22473208 | validated |
| mirTarbase | hsa-miR-222-3p  | MROH8     | 140699 | ENSG00000101353 | 23622248 | validated |
| mirTarbase | hsa-miR-106b-5p | BRI3BP    | 140707 | ENSG00000184992 | 23824327 | validated |
| mirTarbase | hsa-miR-505-3p  | RIMS4     | 140730 | ENSG00000101098 | 27292025 | validated |
| mirTarbase | hsa-miR-15b-5p  | DYNLL2    | 140735 | ENSG00000264364 | 23446348 | validated |
| mirTarbase | hsa-miR-505-3p  | TMEM37    | 140738 | ENSG00000171227 | 23592263 | validated |
| mirTarbase | hsa-miR-181a-5p | SMCR8     | 140775 | ENSG00000176994 | 22473208 | validated |
| mirTarbase | hsa-miR-505-3p  | SRXN1     | 140809 | ENSG00000271303 | 23313552 | validated |
| mirTarbase | hsa-miR-301a-3p | ROMO1     | 140823 | ENSG00000125995 | 23824327 | validated |
| mirTarbase | hsa-miR-192-5p  | ZSWIM3    | 140831 | ENSG00000132801 | 19074876 | validated |
| mirTarbase | hsa-miR-106b-5p | ZNF280B   | 140883 | ENSG00000275004 | 22473208 | validated |
| mirTarbase | hsa-miR-212-3p  | ZNF280B   | 140883 | ENSG00000275004 | 21572407 | validated |
| mirTarbase | hsa-miR-21-5p   | SREK1     | 140890 | ENSG00000153914 | 18591254 | validated |
| mirTarbase | hsa-miR-15b-5p  | SREK1     | 140890 | ENSG00000153914 | 24398324 | validated |
| mirTarbase | hsa-miR-106b-5p | SAMD8     | 142891 | ENSG00000156671 | 21572407 | validated |
| mirTarbase | hsa-miR-301a-3p | SAMD8     | 142891 | ENSG00000156671 | 21572407 | validated |
| mirTarbase | hsa-miR-212-3p  | TRUB1     | 142940 | ENSG00000165832 | 21572407 | validated |
| mirTarbase | hsa-miR-106b-5p | VTI1A     | 143187 | ENSG00000151532 | 22473208 | validated |
| mirTarbase | hsa-miR-15b-5p  | CACUL1    | 143384 | ENSG00000151893 | 21572407 | validated |
| mirTarbase | hsa-miR-106b-5p | SESN3     | 143686 | ENSG00000149212 | 20371350 | validated |
| mirTarbase | hsa-miR-222-3p  | ARHGAP42  | 143872 | ENSG00000165895 | 23446348 | validated |
| mirTarbase | hsa-miR-181a-5p | KBTBD3    | 143879 | ENSG00000182359 | 17612493 | validated |
| mirTarbase | hsa-miR-192-5p  | POGLUT3   | 143888 | ENSG00000178202 | 19074876 | validated |
| mirTarbase | hsa-miR-296-5p  | TMEM86A   | 144110 | ENSG00000151117 | 22012620 | validated |
| mirTarbase | hsa-miR-192-5p  | PRICKLE1  | 144165 | ENSG00000139174 | 19074876 | validated |
| mirTarbase | hsa-miR-192-5p  | ALG10B    | 144245 | ENSG00000175548 | 19074876 | validated |
| mirTarbase | hsa-miR-181a-5p | ZNF664    | 144348 | ENSG00000179195 | 22473208 | validated |
| mirTarbase | hsa-miR-15b-5p  | ETFRF1    | 144363 | ENSG00000205707 | 22473208 | validated |
| mirTarbase | hsa-miR-15b-5p  | E2F7      | 144455 | ENSG00000165891 | 22473208 | validated |
| mirTarbase | hsa-miR-326     | FAM216B   | 144809 | ENSG00000179813 | 23824327 | validated |
| mirTarbase | hsa-miR-15b-5p  | HNRNPA1L2 | 144983 | ENSG00000139675 | 23313552 | validated |
| mirTarbase | hsa-miR-326     | HNRNPA1L2 | 144983 | ENSG00000139675 | 23313552 | validated |
| mirTarbase | hsa-miR-192-5p  | MIPOL1    | 145282 | ENSG00000151338 | 19074876 | validated |
| mirTarbase | hsa-miR-301a-3p | PTGR2     | 145482 | ENSG00000140043 | 23824327 | validated |
| mirTarbase | hsa-miR-192-5p  | CEP128    | 145508 | ENSG00000100629 | 19074876 | validated |
| mirTarbase | hsa-miR-192-5p  | NRG4      | 145957 | ENSG00000169752 | 19074876 | validated |
| mirTarbase | hsa-miR-15b-5p  | CMTM4     | 146223 | ENSG00000183723 | 20371350 | validated |
| mirTarbase | hsa-miR-505-3p  | FBXL16    | 146330 | ENSG00000127585 | 23824327 | validated |
| mirTarbase | hsa-miR-326     | FBXL16    | 146330 | ENSG00000127585 | 23824327 | validated |
| mirTarbase | hsa-miR-106b-5p | ZNF597    | 146434 | ENSG00000167981 | 22473208 | validated |
| mirTarbase | hsa-miR-181a-5p | ZNF597    | 146434 | ENSG00000167981 | 19536157 | validated |
| mirTarbase | hsa-miR-106b-5p | ZNF785    | 146540 | ENSG00000197162 | 23706177 | validated |
| mirTarbase | hsa-miR-192-5p  | TCAM1P    | 146771 |                 | 19074876 | validated |
| mirTarbase | hsa-miR-301a-3p | ODF4      | 146852 | ENSG00000184650 | 23824327 | validated |
| mirTarbase | hsa-miR-181a-5p | SLC35G3   | 146861 | ENSG00000164729 | 23824327 | validated |

|            |                 |          |        |                 |          |           |
|------------|-----------------|----------|--------|-----------------|----------|-----------|
| mirtarbase | hsa-miR-106b-5p | RUNDC1   | 146923 | ENSG00000198863 | 22473208 | validated |
| mirtarbase | hsa-miR-301a-3p | RUNDC1   | 146923 | ENSG00000198863 | 23313552 | validated |
| mirtarbase | hsa-miR-192-5p  | EME1     | 146956 | ENSG00000154920 | 19074876 | validated |
| mirtarbase | hsa-miR-301a-3p | WIPF2    | 147179 | ENSG00000171475 | 21572407 | validated |
| mirtarbase | hsa-miR-106b-5p | WIPF2    | 147179 | ENSG00000171475 | 21572407 | validated |
| mirtarbase | hsa-miR-222-3p  | C18orf25 | 147339 | ENSG00000152242 | 22815788 | validated |
| mirtarbase | hsa-miR-144-3p  | ZNF480   | 147657 | ENSG00000198464 | 22100165 | validated |
| mirtarbase | hsa-miR-106b-5p | ZNF578   | 147660 | ENSG00000258405 | 23313552 | validated |
| mirtarbase | hsa-miR-301a-3p | ZNF417   | 147687 | ENSG00000173480 | 23446348 | validated |
| mirtarbase | hsa-miR-106b-5p | ZNF417   | 147687 | ENSG00000173480 | 23446348 | validated |
| mirtarbase | hsa-miR-181a-5p | ZNF558   | 148156 | ENSG00000167785 | 17612493 | validated |
| mirtarbase | hsa-miR-222-3p  | ZNF714   | 148206 | ENSG00000160352 | 23622248 | validated |
| mirtarbase | hsa-miR-106b-5p | ZNF681   | 148213 | ENSG00000196172 | 21572407 | validated |
| mirtarbase | hsa-miR-192-5p  | SAMD13   | 148418 | ENSG00000203943 | 19074876 | validated |
| mirtarbase | hsa-miR-21-5p   | TLCD4    | 148534 | ENSG00000152078 | 18591254 | validated |
| mirtarbase | hsa-miR-192-5p  | SLC35F3  | 148641 | ENSG00000183780 | 19074876 | validated |
| mirtarbase | hsa-miR-144-3p  | B3GALNT2 | 148789 | ENSG00000162885 | 27292025 | validated |
| mirtarbase | hsa-miR-222-3p  | B3GALNT2 | 148789 | ENSG00000162885 | 27292025 | validated |
| mirtarbase | hsa-miR-106b-5p | SLC30A7  | 148867 | ENSG00000162695 | 23592263 | validated |
| mirtarbase | hsa-miR-181a-5p | DCST1    | 149095 | ENSG00000163357 | 17612493 | validated |
| mirtarbase | hsa-miR-106b-5p | MANEAL   | 149175 | ENSG00000185090 | 23313552 | validated |
| mirtarbase | hsa-miR-301a-3p | IL23R    | 149233 | ENSG00000162594 | 23824327 | validated |
| mirtarbase | hsa-miR-21-5p   | EXOC8    | 149371 | ENSG00000116903 | 18591254 | validated |
| mirtarbase | hsa-miR-222-3p  | EXOC8    | 149371 | ENSG00000116903 | 20371350 | validated |
| mirtarbase | hsa-miR-18a-5p  | PDIK1L   | 149420 | ENSG00000175087 | 23622248 | validated |
| mirtarbase | hsa-miR-15b-5p  | PDIK1L   | 149420 | ENSG00000175087 | 22473208 | validated |
| mirtarbase | hsa-miR-222-3p  | PDIK1L   | 149420 | ENSG00000175087 | 21572407 | validated |
| mirtarbase | hsa-miR-181a-5p | RNF187   | 149603 | ENSG00000168159 | 19536157 | validated |
| mirtarbase | hsa-miR-192-5p  | LSM14B   | 149986 | ENSG00000149657 | 19074876 | validated |
| mirtarbase | hsa-miR-106b-5p | SIK1     | 150094 | ENSG00000142178 | 21572407 | validated |
| mirtarbase | hsa-miR-15b-5p  | SIK1     | 150094 | ENSG00000142178 | 22473208 | validated |
| mirtarbase | hsa-miR-301a-3p | SIK1     | 150094 | ENSG00000142178 | 23592263 | validated |
| mirtarbase | hsa-miR-106b-5p | DUSP18   | 150290 | ENSG00000167065 | 22473208 | validated |
| mirtarbase | hsa-miR-192-5p  | DUSP18   | 150290 | ENSG00000167065 | 22291592 | validated |
| mirtarbase | hsa-miR-301a-3p | DUSP18   | 150290 | ENSG00000167065 | 23824327 | validated |
| mirtarbase | hsa-miR-582-3p  | DUSP18   | 150290 | ENSG00000167065 | 27292025 | validated |
| mirtarbase | hsa-miR-192-5p  | CKAP2L   | 150468 | ENSG00000169607 | 19074876 | validated |
| mirtarbase | hsa-miR-106b-5p | FAM117B  | 150864 | ENSG00000138439 | 22473208 | validated |
| mirtarbase | hsa-miR-192-5p  | GAREM2   | 150946 | ENSG00000157833 | 19074876 | validated |
| mirtarbase | hsa-miR-192-5p  | SEPTIN10 | 151011 | ENSG00000186522 | 19074876 | validated |
| mirtarbase | hsa-miR-192-5p  | ZNF385B  | 151126 | ENSG00000144331 | 19074876 | validated |
| mirtarbase | hsa-miR-192-5p  | ERFE     | 151176 | ENSG00000178752 | 19074876 | validated |
| mirtarbase | hsa-miR-181a-5p | ARL6IP6  | 151188 | ENSG00000177917 | 17612493 | validated |
| mirtarbase | hsa-miR-192-5p  | KLHL23   | 151230 | ENSG00000213160 | 19074876 | validated |
| mirtarbase | hsa-miR-192-5p  | SGO2     | 151246 | ENSG00000163535 | 19074876 | validated |
| mirtarbase | hsa-miR-222-3p  | LRATD1   | 151354 | ENSG00000162981 | 22291592 | validated |
| mirtarbase | hsa-miR-192-5p  | SLC16A14 | 151473 | ENSG00000163053 | 19074876 | validated |
| mirtarbase | hsa-miR-106b-5p | GPR155   | 151556 | ENSG00000163328 | 23446348 | validated |
| mirtarbase | hsa-miR-21-5p   | DTX3L    | 151636 | ENSG00000163840 | 18591254 | validated |
| mirtarbase | hsa-miR-21-5p   | PPM1L    | 151742 | ENSG00000163590 | 20371350 | validated |
| mirtarbase | hsa-miR-15b-5p  | CCDC80   | 151887 | ENSG00000091986 | 20371350 | validated |
| mirtarbase | hsa-miR-326     | CCDC12   | 151903 | ENSG00000160799 | 23622248 | validated |
| mirtarbase | hsa-miR-301a-3p | MB21D2   | 151963 | ENSG00000180611 | 21572407 | validated |
| mirtarbase | hsa-miR-15b-5p  | RNF38    | 152006 | ENSG00000137075 | 22473208 | validated |
| mirtarbase | hsa-miR-144-3p  | ZNF827   | 152485 | ENSG00000151612 | 22012620 | validated |
| mirtarbase | hsa-miR-192-5p  | NIPAL1   | 152519 | ENSG00000163293 | 19074876 | validated |
| mirtarbase | hsa-miR-106b-5p | THAP6    | 152815 | ENSG00000174796 | 17242205 | validated |
| mirtarbase | hsa-miR-301a-3p | THAP6    | 152815 | ENSG00000174796 | 21572407 | validated |
| mirtarbase | hsa-miR-326     | DAB2IP   | 153090 | ENSG00000136848 | 26701625 | validated |
| mirtarbase | hsa-miR-301a-3p | SLC38A9  | 153129 | ENSG00000177058 | 23824327 | validated |
| mirtarbase | hsa-miR-15b-5p  | CREBRF   | 153222 | ENSG00000164463 | 22473208 | validated |
| mirtarbase | hsa-miR-106b-5p | TMEM167A | 153339 | ENSG00000174695 | 22473208 | validated |
| mirtarbase | hsa-miR-15b-5p  | TMEM161B | 153396 | ENSG00000164180 | 21572407 | validated |
| mirtarbase | hsa-miR-192-5p  | BTNL9    | 153579 | ENSG00000165810 | 19074876 | validated |
| mirtarbase | hsa-miR-21-5p   | SNRNP48  | 154007 | ENSG00000168566 | 18591254 | validated |
| mirtarbase | hsa-miR-106b-5p | CNKSR3   | 154043 | ENSG00000153721 | 23446348 | validated |
| mirtarbase | hsa-miR-15b-5p  | CNKSR3   | 154043 | ENSG00000153721 | 21572407 | validated |
| mirtarbase | hsa-miR-192-5p  | SAMD3    | 154075 | ENSG00000164483 | 19074876 | validated |
| mirtarbase | hsa-miR-106b-5p | BMT2     | 154743 | ENSG00000164603 | 22473208 | validated |
| mirtarbase | hsa-miR-15b-5p  | AMOT     | 154796 | ENSG00000126016 | 21572407 | validated |
| mirtarbase | hsa-miR-15b-5p  | AMOTL1   | 154810 | ENSG00000166025 | 23592263 | validated |

|            |                 |           |        |                 |          |           |
|------------|-----------------|-----------|--------|-----------------|----------|-----------|
| mirTarbase | hsa-miR-326     | ZNF746    | 155061 | ENSG00000181220 | 23622248 | validated |
| mirTarbase | hsa-miR-326     | METTTL27  | 155368 | ENSG00000165171 | 23824327 | validated |
| mirTarbase | hsa-miR-192-5p  | SBDSP1    | 155370 |                 | 19074876 | validated |
| mirTarbase | hsa-miR-15b-5p  | PEBP4     | 157310 | ENSG00000134020 | 25721211 | validated |
| mirTarbase | hsa-miR-18a-5p  | RDH10     | 157506 | ENSG00000121039 | 23592263 | validated |
| mirTarbase | hsa-miR-21-5p   | ANKRD46   | 157567 | ENSG00000186106 | 21219636 | validated |
| mirTarbase | hsa-miR-192-5p  | ESCO2     | 157570 | ENSG00000171320 | 19074876 | validated |
| mirTarbase | hsa-miR-106b-5p | FAM91A1   | 157769 | ENSG00000176853 | 23622248 | validated |
| mirTarbase | hsa-miR-192-5p  | CLVS1     | 157807 | ENSG00000177182 | 19074876 | validated |
| mirTarbase | hsa-miR-15b-5p  | CAMSAP1   | 157922 | ENSG00000130559 | 22473208 | validated |
| mirTarbase | hsa-miR-192-5p  | C9orf163  | 158055 | ENSG00000196366 | 19074876 | validated |
| mirTarbase | hsa-miR-21-5p   | RASEF     | 158158 | ENSG00000165105 | 18591254 | validated |
| mirTarbase | hsa-miR-15b-5p  | RASEF     | 158158 | ENSG00000165105 | 20371350 | validated |
| mirTarbase | hsa-miR-192-5p  | FAM120AOS | 158293 | ENSG00000188938 | 19074876 | validated |
| mirTarbase | hsa-miR-301a-3p | FAM120AOS | 158293 | ENSG00000188938 | 23824327 | validated |
| mirTarbase | hsa-miR-192-5p  | KIAA1958  | 158405 | ENSG00000165185 | 19074876 | validated |
| mirTarbase | hsa-miR-301a-3p | PRUNE2    | 158471 | ENSG00000106772 | 21572407 | validated |
| mirTarbase | hsa-miR-144-3p  | CBLL2     | 158506 | ENSG00000175809 | 22291592 | validated |
| mirTarbase | hsa-miR-222-3p  | CSAG1     | 158511 | ENSG00000198930 | 23622248 | validated |
| mirTarbase | hsa-miR-296-5p  | ZDHHC15   | 158866 | ENSG00000102383 | 22012620 | validated |
| mirTarbase | hsa-miR-181a-5p | ZDHHC15   | 158866 | ENSG00000102383 | 22012620 | validated |
| mirTarbase | hsa-miR-582-5p  | ZDHHC15   | 158866 | ENSG00000102383 | 23824327 | validated |
| mirTarbase | hsa-miR-106b-5p | CXorf38   | 159013 | ENSG00000185753 | 23313552 | validated |
| mirTarbase | hsa-miR-144-3p  | FAM122B   | 159090 | ENSG00000156504 | 24398324 | validated |
| mirTarbase | hsa-miR-15b-5p  | FAM122B   | 159090 | ENSG00000156504 | 24398324 | validated |
| mirTarbase | hsa-miR-192-5p  | USP54     | 159195 | ENSG00000166348 | 19074876 | validated |
| mirTarbase | hsa-miR-192-5p  | SLC35G1   | 159371 | ENSG00000176273 | 19074876 | validated |
| mirTarbase | hsa-miR-505-3p  | SLC5A12   | 159963 | ENSG00000148942 | 19536157 | validated |
| mirTarbase | hsa-miR-192-5p  | TMTC2     | 160335 | ENSG00000179104 | 19074876 | validated |
| mirTarbase | hsa-miR-192-5p  | TMTC3     | 160418 | ENSG00000139324 | 19074876 | validated |
| mirTarbase | hsa-miR-144-3p  | TMTC3     | 160418 | ENSG00000139324 | 21572407 | validated |
| mirTarbase | hsa-miR-106b-5p | DENND5B   | 160518 | ENSG00000170456 | 22473208 | validated |
| mirTarbase | hsa-miR-582-5p  | DENND5B   | 160518 | ENSG00000170456 | 23313552 | validated |
| mirTarbase | hsa-miR-144-3p  | DENND5B   | 160518 | ENSG00000170456 | 23313552 | validated |
| mirTarbase | hsa-miR-15b-5p  | PPTC7     | 160760 | ENSG00000196850 | 23622248 | validated |
| mirTarbase | hsa-miR-505-3p  | DGKH      | 160851 | ENSG00000102780 | 27292025 | validated |
| mirTarbase | hsa-miR-192-5p  | GPR180    | 160897 | ENSG00000152749 | 19074876 | validated |
| mirTarbase | hsa-miR-15b-5p  | GPR180    | 160897 | ENSG00000152749 | 23446348 | validated |
| mirTarbase | hsa-miR-15b-5p  | SPRED1    | 161742 | ENSG00000166068 | 22473208 | validated |
| mirTarbase | hsa-miR-106b-5p | SPRED1    | 161742 | ENSG00000166068 | 23592263 | validated |
| mirTarbase | hsa-miR-582-5p  | PGBD4     | 161779 | ENSG00000182405 | 26701625 | validated |
| mirTarbase | hsa-miR-181a-5p | FSIP1     | 161835 | ENSG00000150667 | 17612493 | validated |
| mirTarbase | hsa-miR-192-5p  | ZFP1      | 162239 | ENSG00000184517 | 19074876 | validated |
| mirTarbase | hsa-miR-222-3p  | ZFP1      | 162239 | ENSG00000184517 | 23824327 | validated |
| mirTarbase | hsa-miR-192-5p  | ZNF519    | 162655 | ENSG00000175322 | 19074876 | validated |
| mirTarbase | hsa-miR-192-5p  | C18orf54  | 162681 | ENSG00000166845 | 19074876 | validated |
| mirTarbase | hsa-miR-192-5p  | ZNF320    | 162967 | ENSG00000182986 | 19074876 | validated |
| mirTarbase | hsa-miR-181a-5p | ZNF846    | 162993 | ENSG00000196605 | 20371350 | validated |
| mirTarbase | hsa-miR-181a-5p | ZNF791    | 163049 | ENSG00000173875 | 23446348 | validated |
| mirTarbase | hsa-miR-192-5p  | ZNF114    | 163071 | ENSG00000178150 | 19074876 | validated |
| mirTarbase | hsa-miR-181a-5p | ZNF781    | 163115 | ENSG00000196381 | 24398324 | validated |
| mirTarbase | hsa-miR-181a-5p | ZNF780B   | 163131 | ENSG00000128000 | 21572407 | validated |
| mirTarbase | hsa-miR-582-5p  | ZNF100    | 163227 | ENSG00000197020 | 23446348 | validated |
| mirTarbase | hsa-miR-21-5p   | TOR1AIP2  | 163590 | ENSG00000169905 | 22815788 | validated |
| mirTarbase | hsa-miR-582-5p  | TOR1AIP2  | 163590 | ENSG00000169905 | 23592263 | validated |
| mirTarbase | hsa-miR-144-3p  | TOR1AIP2  | 163590 | ENSG00000169905 | 23592263 | validated |
| mirTarbase | hsa-miR-192-5p  | IFNLR1    | 163702 | ENSG00000185436 | 19074876 | validated |
| mirTarbase | hsa-miR-301a-3p | IFNLR1    | 163702 | ENSG00000185436 | 19536157 | validated |
| mirTarbase | hsa-miR-192-5p  | SASS6     | 163786 | ENSG00000156876 | 19074876 | validated |
| mirTarbase | hsa-miR-18a-5p  | SASS6     | 163786 | ENSG00000156876 | 23622248 | validated |
| mirTarbase | hsa-miR-181a-5p | HFM1      | 164045 | ENSG00000162669 | 23824327 | validated |
| mirTarbase | hsa-miR-21-5p   | LONRF2    | 164832 | ENSG00000170500 | 18591254 | validated |
| mirTarbase | hsa-miR-296-5p  | TOGARAM2  | 165186 | ENSG00000189350 | 23824327 | validated |
| mirTarbase | hsa-miR-192-5p  | FAM171B   | 165215 | ENSG00000144369 | 19074876 | validated |
| mirTarbase | hsa-miR-106b-5p | UBXN2A    | 165324 | ENSG00000173960 | 21572407 | validated |
| mirTarbase | hsa-miR-212-3p  | UBXN2A    | 165324 | ENSG00000173960 | 23706177 | validated |
| mirTarbase | hsa-miR-15b-5p  | RNF168    | 165918 | ENSG00000163961 | 23592263 | validated |
| mirTarbase | hsa-miR-21-5p   | PRICKLE2  | 166336 | ENSG00000163637 | 18591254 | validated |
| mirTarbase | hsa-miR-15b-5p  | PRICKLE2  | 166336 | ENSG00000163637 | 24398324 | validated |
| mirTarbase | hsa-miR-505-3p  | PRICKLE2  | 166336 | ENSG00000163637 | 21572407 | validated |
| mirTarbase | hsa-miR-181a-5p | RASSF6    | 166824 | ENSG00000169435 | 17612493 | validated |

|            |                 |         |        |                 |          |           |
|------------|-----------------|---------|--------|-----------------|----------|-----------|
| mirTarbase | hsa-miR-192-5p  | SGMS2   | 166929 | ENSG00000164023 | 19074876 | validated |
| mirTarbase | hsa-miR-301a-3p | TENT2   | 167153 | ENSG00000164329 | 21572407 | validated |
| mirTarbase | hsa-miR-106b-5p | CCDC71L | 168455 | ENSG00000253276 | 20371350 | validated |
| mirTarbase | hsa-miR-212-3p  | BMPER   | 168667 | ENSG00000164619 | 23708386 | validated |
| mirTarbase | hsa-miR-106b-5p | ZNF800  | 168850 | ENSG00000048405 | 22473208 | validated |
| mirTarbase | hsa-miR-144-3p  | ZNF800  | 168850 | ENSG00000048405 | 23592263 | validated |
| mirTarbase | hsa-miR-301a-3p | ZNF800  | 168850 | ENSG00000048405 | 23592263 | validated |
| mirTarbase | hsa-miR-181a-5p | TMEM64  | 169200 | ENSG00000180694 | 20371350 | validated |
| mirTarbase | hsa-miR-106b-5p | TMEM64  | 169200 | ENSG00000180694 | 22473208 | validated |
| mirTarbase | hsa-miR-212-3p  | OLFML2A | 169611 | ENSG00000185585 | 23824327 | validated |
| mirTarbase | hsa-miR-181a-5p | FAM47B  | 170062 | ENSG00000189132 | 17612493 | validated |
| mirTarbase | hsa-miR-192-5p  | FUT11   | 170384 | ENSG00000196968 | 19074876 | validated |
| mirTarbase | hsa-miR-505-3p  | FUT11   | 170384 | ENSG00000196968 | 23824327 | validated |
| mirTarbase | hsa-miR-301a-3p | FUT11   | 170384 | ENSG00000196968 | 27418678 | validated |
| mirTarbase | hsa-miR-106b-5p | COMMD6  | 170622 | ENSG00000188243 | 17242205 | validated |
| mirTarbase | hsa-miR-192-5p  | ZNF525  | 170958 | ENSG00000203326 | 19074876 | validated |
| mirTarbase | hsa-miR-582-5p  | ZNF431  | 170959 | ENSG00000196705 | 22012620 | validated |
| mirTarbase | hsa-miR-301a-3p | ZNF431  | 170959 | ENSG00000196705 | 23824327 | validated |
| mirTarbase | hsa-miR-15b-5p  | ASXL1   | 171023 | ENSG00000171456 | 22473208 | validated |
| mirTarbase | hsa-miR-15b-5p  | RHOV    | 171177 | ENSG00000104140 | 22473208 | validated |
| mirTarbase | hsa-miR-181a-5p | HIGD2A  | 192286 | ENSG00000146066 | 22473208 | validated |
| mirTarbase | hsa-miR-106b-5p | AGO3    | 192669 | ENSG00000126070 | 23446348 | validated |
| mirTarbase | hsa-miR-301a-3p | AGO3    | 192669 | ENSG00000126070 | 23824327 | validated |
| mirTarbase | hsa-miR-21-5p   | AGO4    | 192670 | ENSG00000134698 | 18591254 | validated |
| mirTarbase | hsa-miR-15b-5p  | AGO4    | 192670 | ENSG00000134698 | 20371350 | validated |
| mirTarbase | hsa-miR-582-5p  | AGO4    | 192670 | ENSG00000134698 | 20371350 | validated |
| mirTarbase | hsa-miR-144-3p  | AGO4    | 192670 | ENSG00000134698 | 20371350 | validated |
| mirTarbase | hsa-miR-106b-5p | SCAMP5  | 192683 | ENSG00000198794 | 22473208 | validated |
| mirTarbase | hsa-miR-15b-5p  | SCAMP5  | 192683 | ENSG00000198794 | 22473208 | validated |
| mirTarbase | hsa-miR-21-5p   | ZNF367  | 195828 | ENSG00000165244 | 20371350 | validated |
| mirTarbase | hsa-miR-15b-5p  | ZNF367  | 195828 | ENSG00000165244 | 23592263 | validated |
| mirTarbase | hsa-miR-18a-5p  | ZNF367  | 195828 | ENSG00000165244 | 20371350 | validated |
| mirTarbase | hsa-miR-192-5p  | ANO6    | 196527 | ENSG00000177119 | 19074876 | validated |
| mirTarbase | hsa-miR-15b-5p  | ARID2   | 196528 | ENSG00000189079 | 23622248 | validated |
| mirTarbase | hsa-miR-212-3p  | ARID2   | 196528 | ENSG00000189079 | 23592263 | validated |
| mirTarbase | hsa-miR-106b-5p | LDHD    | 197257 | ENSG00000166816 | 23313552 | validated |
| mirTarbase | hsa-miR-192-5p  | ACSF3   | 197322 | ENSG00000176715 | 19074876 | validated |
| mirTarbase | hsa-miR-582-5p  | ALG14   | 199857 | ENSG00000172339 | 20371350 | validated |
| mirTarbase | hsa-miR-18a-5p  | ALG14   | 199857 | ENSG00000172339 | 20371350 | validated |
| mirTarbase | hsa-miR-192-5p  | FAAP20  | 199990 | ENSG00000162585 | 19074876 | validated |
| mirTarbase | hsa-miR-15b-5p  | TXLNA   | 200081 | ENSG00000084652 | 23622248 | validated |
| mirTarbase | hsa-miR-106b-5p | TXLNA   | 200081 | ENSG00000084652 | 22473208 | validated |
| mirTarbase | hsa-miR-222-3p  | RNF215  | 200312 | ENSG00000099999 | 23622248 | validated |
| mirTarbase | hsa-miR-106b-5p | TET3    | 200424 | ENSG00000187605 | 22473208 | validated |
| mirTarbase | hsa-miR-15b-5p  | TET3    | 200424 | ENSG00000187605 | 22473208 | validated |
| mirTarbase | hsa-miR-192-5p  | TMEM17  | 200728 | ENSG00000186889 | 19074876 | validated |
| mirTarbase | hsa-miR-192-5p  | SPRED2  | 200734 | ENSG00000198369 | 20371350 | validated |
| mirTarbase | hsa-miR-106b-5p | ARL13B  | 200894 | ENSG00000169379 | 17242205 | validated |
| mirTarbase | hsa-miR-192-5p  | DHFR2   | 200895 | ENSG00000178700 | 19074876 | validated |
| mirTarbase | hsa-miR-582-5p  | TVP23C  | 201158 | ENSG00000175106 | 21572407 | validated |
| mirTarbase | hsa-miR-15b-5p  | FLCN    | 201163 | ENSG00000154803 | 23446348 | validated |
| mirTarbase | hsa-miR-106b-5p | TRIM65  | 201292 | ENSG00000141569 | 27292025 | validated |
| mirTarbase | hsa-miR-192-5p  | RDM1    | 201299 | ENSG00000276432 | 19074876 | validated |
| mirTarbase | hsa-miR-106b-5p | RAB12   | 201475 | ENSG00000206418 | 22473208 | validated |
| mirTarbase | hsa-miR-15b-5p  | STT3B   | 201595 | ENSG00000163527 | 23622248 | validated |
| mirTarbase | hsa-miR-15b-5p  | DENND6A | 201627 | ENSG00000174839 | 26701625 | validated |
| mirTarbase | hsa-miR-181a-5p | TMEM192 | 201931 | ENSG00000170088 | 23622248 | validated |
| mirTarbase | hsa-miR-582-5p  | TMEM192 | 201931 | ENSG00000170088 | 21572407 | validated |
| mirTarbase | hsa-miR-144-3p  | TMEM192 | 201931 | ENSG00000170088 | 21572407 | validated |
| mirTarbase | hsa-miR-192-5p  | PRIMPOL | 201973 | ENSG00000164306 | 19074876 | validated |
| mirTarbase | hsa-miR-106b-5p | CCDC125 | 202243 | ENSG00000277868 | 23313552 | validated |
| mirTarbase | hsa-miR-505-3p  | TUBB    | 203068 | ENSG00000227739 | 23622248 | validated |
| mirTarbase | hsa-miR-181a-5p | TUBB    | 203068 | ENSG00000227739 | 22473208 | validated |
| mirTarbase | hsa-miR-15b-5p  | TUBB    | 203068 | ENSG00000227739 | 22473208 | validated |
| mirTarbase | hsa-miR-192-5p  | ERICH5  | 203111 | ENSG00000177459 | 19074876 | validated |
| mirTarbase | hsa-miR-192-5p  | ZNF449  | 203523 | ENSG00000173275 | 19074876 | validated |
| mirTarbase | hsa-miR-15b-5p  | ZNF449  | 203523 | ENSG00000173275 | 21572407 | validated |
| mirTarbase | hsa-miR-181a-5p | ZNF449  | 203523 | ENSG00000173275 | 19536157 | validated |
| mirTarbase | hsa-miR-18a-5p  | VMA21   | 203547 | ENSG00000160131 | 23592263 | validated |
| mirTarbase | hsa-miR-181a-5p | C2orf69 | 205327 | ENSG00000178074 | 22473208 | validated |
| mirTarbase | hsa-miR-106b-5p | C2orf69 | 205327 | ENSG00000178074 | 22473208 | validated |

|            |                 |          |        |                 |          |           |
|------------|-----------------|----------|--------|-----------------|----------|-----------|
| mirTarbase | hsa-miR-18a-5p  | SLC36A1  | 206358 | ENSG00000123643 | 20371350 | validated |
| mirTarbase | hsa-miR-106b-5p | SAMD9L   | 219285 | ENSG00000177409 | 22473208 | validated |
| mirTarbase | hsa-miR-192-5p  | USP12    | 219333 | ENSG00000152484 | 19074876 | validated |
| mirTarbase | hsa-miR-181a-5p | UNC5B    | 219699 | ENSG00000107731 | 23824327 | validated |
| mirTarbase | hsa-miR-192-5p  | FAM241B  | 219738 | ENSG00000171224 | 19074876 | validated |
| mirTarbase | hsa-miR-181a-5p | ZNF25    | 219749 | ENSG00000175395 | 17612493 | validated |
| mirTarbase | hsa-miR-192-5p  | CCNY     | 219771 | ENSG00000108100 | 19074876 | validated |
| mirTarbase | hsa-miR-192-5p  | RTKN2    | 219790 | ENSG00000182010 | 19074876 | validated |
| mirTarbase | hsa-miR-192-5p  | HYLS1    | 219844 | ENSG00000198331 | 19074876 | validated |
| mirTarbase | hsa-miR-192-5p  | TLCD5    | 219902 | ENSG00000181264 | 19074876 | validated |
| mirTarbase | hsa-miR-15b-5p  | CYB561A3 | 220002 | ENSG00000162144 | 22473208 | validated |
| mirTarbase | hsa-miR-15b-5p  | CCDC83   | 220047 | ENSG00000150676 | 21572407 | validated |
| mirTarbase | hsa-miR-192-5p  | SKA1     | 220134 | ENSG00000262634 | 19074876 | validated |
| mirTarbase | hsa-miR-181a-5p | OTUD1    | 220213 | ENSG00000165312 | 17612493 | validated |
| mirTarbase | hsa-miR-192-5p  | OTUD1    | 220213 | ENSG00000165312 | 19074876 | validated |
| mirTarbase | hsa-miR-21-5p   | OTUD1    | 220213 | ENSG00000165312 | 23622248 | validated |
| mirTarbase | hsa-miR-505-3p  | CBWD5    | 220869 | ENSG00000147996 | 24398324 | validated |
| mirTarbase | hsa-miR-106b-5p | SLC16A9  | 220963 | ENSG00000165449 | 22473208 | validated |
| mirTarbase | hsa-miR-582-3p  | SLC16A9  | 220963 | ENSG00000165449 | 21572407 | validated |
| mirTarbase | hsa-miR-505-3p  | HNRNPA3  | 220988 | ENSG00000170144 | 23622248 | validated |
| mirTarbase | hsa-miR-106b-5p | REEP3    | 221035 | ENSG00000165476 | 22473208 | validated |
| mirTarbase | hsa-miR-326     | JMJD1C   | 221037 | ENSG00000171988 | 23622248 | validated |
| mirTarbase | hsa-miR-144-3p  | ARL5B    | 221079 | ENSG00000165997 | 23592263 | validated |
| mirTarbase | hsa-miR-326     | ARL5B    | 221079 | ENSG00000165997 | 23446348 | validated |
| mirTarbase | hsa-miR-326     | HNRNPUL2 | 221092 | ENSG00000214753 | 23622248 | validated |
| mirTarbase | hsa-miR-192-5p  | SPATA13  | 221178 | ENSG00000182957 | 19074876 | validated |
| mirTarbase | hsa-miR-505-3p  | OPN5     | 221391 | ENSG00000124818 | 23446348 | validated |
| mirTarbase | hsa-miR-106b-5p | KIF6     | 221458 | ENSG00000164627 | 23446348 | validated |
| mirTarbase | hsa-miR-15b-5p  | ARMC12   | 221481 | ENSG00000157343 | 20371350 | validated |
| mirTarbase | hsa-miR-505-3p  | ZBTB9    | 221504 | ENSG00000236515 | 23622248 | validated |
| mirTarbase | hsa-miR-106b-5p | ZBTB9    | 221504 | ENSG00000236515 | 22473208 | validated |
| mirTarbase | hsa-miR-192-5p  | KDM1B    | 221656 | ENSG00000165097 | 19074876 | validated |
| mirTarbase | hsa-miR-106b-5p | SMIM13   | 221710 | ENSG00000224531 | 23592263 | validated |
| mirTarbase | hsa-miR-192-5p  | PXDC1    | 221749 | ENSG00000168994 | 19074876 | validated |
| mirTarbase | hsa-miR-222-3p  | PRPS1L1  | 221823 | ENSG00000229937 | 20371350 | validated |
| mirTarbase | hsa-miR-212-3p  | TWISTNB  | 221830 | ENSG00000105849 | 22012620 | validated |
| mirTarbase | hsa-miR-192-5p  | SP8      | 221833 | ENSG00000164651 | 22100165 | validated |
| mirTarbase | hsa-miR-15b-5p  | BRAT1    | 221927 | ENSG00000106009 | 23622248 | validated |
| mirTarbase | hsa-miR-15b-5p  | FOXK1    | 221937 | ENSG00000164916 | 23622248 | validated |
| mirTarbase | hsa-miR-106b-5p | FOXK1    | 221937 | ENSG00000164916 | 23446348 | validated |
| mirTarbase | hsa-miR-192-5p  | CCZ1B    | 221960 | ENSG00000146574 | 19074876 | validated |
| mirTarbase | hsa-miR-181a-5p | TMED4    | 222068 | ENSG00000158604 | 20371350 | validated |
| mirTarbase | hsa-miR-192-5p  | RSBN1L   | 222194 | ENSG00000187257 | 19074876 | validated |
| mirTarbase | hsa-miR-181a-5p | RSBN1L   | 222194 | ENSG00000187257 | 21572407 | validated |
| mirTarbase | hsa-miR-21-5p   | FBXL13   | 222235 | ENSG00000161040 | 23446348 | validated |
| mirTarbase | hsa-miR-18a-5p  | ADGRF2   | 222611 | ENSG00000164393 | 27418678 | validated |
| mirTarbase | hsa-miR-15b-5p  | ZNRF2    | 223082 | ENSG00000180233 | 23446348 | validated |
| mirTarbase | hsa-miR-326     | ZNRF2    | 223082 | ENSG00000180233 | 22100165 | validated |
| mirTarbase | hsa-miR-21-5p   | TXLNGY   | 246126 |                 | 18591254 | validated |
| mirTarbase | hsa-miR-106b-5p | CNOT6L   | 246175 | ENSG00000138767 | 23622248 | validated |
| mirTarbase | hsa-miR-106b-5p | RNASEH1  | 246243 | ENSG00000171865 | 22012620 | validated |
| mirTarbase | hsa-miR-192-5p  | STXBP4   | 252983 | ENSG00000166263 | 19074876 | validated |
| mirTarbase | hsa-miR-106b-5p | PRR14L   | 253143 | ENSG00000183530 | 22473208 | validated |
| mirTarbase | hsa-miR-21-5p   | PRR14L   | 253143 | ENSG00000183530 | 26701625 | validated |
| mirTarbase | hsa-miR-18a-5p  | RICTOR   | 253260 | ENSG00000164327 | 23622248 | validated |
| mirTarbase | hsa-miR-301a-3p | IPMK     | 253430 | ENSG00000151151 | 21572407 | validated |
| mirTarbase | hsa-miR-21-5p   | ZBTB38   | 253461 | ENSG00000177311 | 18591254 | validated |
| mirTarbase | hsa-miR-192-5p  | SLC25A30 | 253512 | ENSG00000174032 | 19074876 | validated |
| mirTarbase | hsa-miR-181a-5p | LCLAT1   | 253558 | ENSG00000172954 | 20371350 | validated |
| mirTarbase | hsa-miR-301a-3p | LCLAT1   | 253558 | ENSG00000172954 | 21572407 | validated |
| mirTarbase | hsa-miR-106b-5p | CADM2    | 253559 | ENSG00000175161 | 22100165 | validated |
| mirTarbase | hsa-miR-15b-5p  | ZNF620   | 253639 | ENSG00000177842 | 23446348 | validated |
| mirTarbase | hsa-miR-301a-3p | ZNF620   | 253639 | ENSG00000177842 | 21572407 | validated |
| mirTarbase | hsa-miR-144-3p  | MMS22L   | 253714 | ENSG00000146263 | 23592263 | validated |
| mirTarbase | hsa-miR-192-5p  | CERS6    | 253782 | ENSG00000172292 | 19074876 | validated |
| mirTarbase | hsa-miR-21-5p   | CERS6    | 253782 | ENSG00000172292 | 18591254 | validated |
| mirTarbase | hsa-miR-192-5p  | MSRB3    | 253827 | ENSG00000174099 | 19074876 | validated |
| mirTarbase | hsa-miR-106b-5p | ZDHHC20  | 253832 | ENSG00000180776 | 23592263 | validated |
| mirTarbase | hsa-miR-144-3p  | UBN2     | 254048 | ENSG00000157741 | 20371350 | validated |
| mirTarbase | hsa-miR-301a-3p | UBN2     | 254048 | ENSG00000157741 | 23446348 | validated |
| mirTarbase | hsa-miR-15b-5p  | UBN2     | 254048 | ENSG00000157741 | 22473208 | validated |

|            |                 |          |        |                 |          |           |
|------------|-----------------|----------|--------|-----------------|----------|-----------|
| mirTarbase | hsa-miR-222-3p  | UBN2     | 254048 | ENSG00000157741 | 23592263 | validated |
| mirTarbase | hsa-miR-192-5p  | EHP1L1   | 254102 | ENSG00000173442 | 19074876 | validated |
| mirTarbase | hsa-miR-181a-5p | FBXO33   | 254170 | ENSG00000165355 | 20371350 | validated |
| mirTarbase | hsa-miR-505-3p  | FBXO33   | 254170 | ENSG00000165355 | 23622248 | validated |
| mirTarbase | hsa-miR-326     | CALHM5   | 254228 | ENSG00000178033 | 22012620 | validated |
| mirTarbase | hsa-miR-21-5p   | LCORL    | 254251 | ENSG00000178177 | 18591254 | validated |
| mirTarbase | hsa-miR-582-5p  | ZDHH24   | 254359 | ENSG00000174165 | 27292025 | validated |
| mirTarbase | hsa-miR-192-5p  | MCM9     | 254394 | ENSG00000111877 | 19074876 | validated |
| mirTarbase | hsa-miR-192-5p  | VXN      | 254778 | ENSG00000169085 | 19074876 | validated |
| mirTarbase | hsa-miR-192-5p  | ZDHH23   | 254887 | ENSG00000184307 | 19074876 | validated |
| mirTarbase | hsa-miR-21-5p   | CASC2    | 255082 |                 | 25446261 | validated |
| mirTarbase | hsa-miR-326     | PLA2G4F  | 255189 | ENSG00000168907 | 23622248 | validated |
| mirTarbase | hsa-miR-21-5p   | LRR57    | 255252 | ENSG00000180979 | 18591254 | validated |
| mirTarbase | hsa-miR-15b-5p  | LRR57    | 255252 | ENSG00000180979 | 22473208 | validated |
| mirTarbase | hsa-miR-192-5p  | PCSK9    | 255738 | ENSG00000169174 | 19074876 | validated |
| mirTarbase | hsa-miR-192-5p  | NPNT     | 255743 | ENSG00000168743 | 19074876 | validated |
| mirTarbase | hsa-miR-106b-5p | NPNT     | 255743 | ENSG00000168743 | 22100165 | validated |
| mirTarbase | hsa-miR-192-5p  | CNEP1R1  | 255919 | ENSG00000205423 | 19074876 | validated |
| mirTarbase | hsa-miR-582-5p  | CNEP1R1  | 255919 | ENSG00000205423 | 23313552 | validated |
| mirTarbase | hsa-miR-144-3p  | CNEP1R1  | 255919 | ENSG00000205423 | 23313552 | validated |
| mirTarbase | hsa-miR-21-5p   | PAN3     | 255967 | ENSG00000152520 | 18591254 | validated |
| mirTarbase | hsa-miR-106b-5p | TMEM196  | 256130 | ENSG00000173452 | 22012620 | validated |
| mirTarbase | hsa-miR-21-5p   | GK5      | 256356 | ENSG00000175066 | 22473208 | validated |
| mirTarbase | hsa-miR-181a-5p | GK5      | 256356 | ENSG00000175066 | 22473208 | validated |
| mirTarbase | hsa-miR-106b-5p | MFS8     | 256471 | ENSG00000164073 | 23446348 | validated |
| mirTarbase | hsa-miR-181a-5p | WDR72    | 256764 | ENSG00000166415 | 23824327 | validated |
| mirTarbase | hsa-miR-582-3p  | C10orf67 | 256815 | ENSG00000179133 | 21572407 | validated |
| mirTarbase | hsa-miR-505-3p  | NEGR1    | 257194 | ENSG00000172260 | 23313552 | validated |
| mirTarbase | hsa-miR-15b-5p  | NEGR1    | 257194 | ENSG00000172260 | 23313552 | validated |
| mirTarbase | hsa-miR-181a-5p | TAB3     | 257397 | ENSG00000157625 | 22942087 | validated |
| mirTarbase | hsa-miR-106b-5p | ANKS4B   | 257629 | ENSG00000175311 | 23313552 | validated |
| mirTarbase | hsa-miR-106b-5p | SGMS1    | 259230 | ENSG00000198964 | 23592263 | validated |
| mirTarbase | hsa-miR-192-5p  | ASPM     | 259266 | ENSG00000066279 | 19074876 | validated |
| mirTarbase | hsa-miR-181a-5p | OFCC1    | 266553 |                 | 17612493 | validated |
| mirTarbase | hsa-miR-106b-5p | SSX7     | 280658 | ENSG00000187754 | 17242205 | validated |
| mirTarbase | hsa-miR-181a-5p | BLOC1S2  | 282991 | ENSG00000196072 | 22473208 | validated |
| mirTarbase | hsa-miR-106b-5p | RBM20    | 282996 | ENSG00000203867 | 23446348 | validated |
| mirTarbase | hsa-miR-301a-3p | RBM20    | 282996 | ENSG00000203867 | 23446348 | validated |
| mirTarbase | hsa-miR-326     | RBM20    | 282996 | ENSG00000203867 | 26701625 | validated |
| mirTarbase | hsa-miR-15b-5p  | MKX      | 283078 | ENSG00000150051 | 21572407 | validated |
| mirTarbase | hsa-miR-106b-5p | PGM2L1   | 283209 | ENSG00000165434 | 22473208 | validated |
| mirTarbase | hsa-miR-18a-5p  | RASSF3   | 283349 | ENSG00000153179 | 20371350 | validated |
| mirTarbase | hsa-miR-106b-5p | ANKRD52  | 283373 | ENSG00000139645 | 22473208 | validated |
| mirTarbase | hsa-miR-192-5p  | GAS2L3   | 283431 | ENSG00000139354 | 19074876 | validated |
| mirTarbase | hsa-miR-192-5p  | SLC46A3  | 283537 | ENSG00000139508 | 19074876 | validated |
| mirTarbase | hsa-miR-144-3p  | SLC46A3  | 283537 | ENSG00000139508 | 24398324 | validated |
| mirTarbase | hsa-miR-192-5p  | GPR137C  | 283554 | ENSG00000180998 | 19074876 | validated |
| mirTarbase | hsa-miR-192-5p  | C17orf58 | 284018 | ENSG00000186665 | 19074876 | validated |
| mirTarbase | hsa-miR-106b-5p | KANSL1   | 284058 | ENSG00000278458 | 23622248 | validated |
| mirTarbase | hsa-miR-106b-5p | FAM171A2 | 284069 | ENSG00000161682 | 23622248 | validated |
| mirTarbase | hsa-miR-106b-5p | NEK8     | 284086 | ENSG00000160602 | 23446348 | validated |
| mirTarbase | hsa-miR-106b-5p | CAVIN1   | 284119 | ENSG00000177469 | 23446348 | validated |
| mirTarbase | hsa-miR-192-5p  | ZADH2    | 284273 | ENSG00000180011 | 19074876 | validated |
| mirTarbase | hsa-miR-21-5p   | ZADH2    | 284273 | ENSG00000180011 | 18591254 | validated |
| mirTarbase | hsa-miR-181a-5p | ZADH2    | 284273 | ENSG00000180011 | 23824327 | validated |
| mirTarbase | hsa-miR-192-5p  | ZNF776   | 284309 | ENSG00000152443 | 23592263 | validated |
| mirTarbase | hsa-miR-192-5p  | ZNF780A  | 284323 | ENSG00000197782 | 19074876 | validated |
| mirTarbase | hsa-miR-106b-5p | ZNF780A  | 284323 | ENSG00000197782 | 23446348 | validated |
| mirTarbase | hsa-miR-181a-5p | ZNF763   | 284390 | ENSG00000197054 | 20591824 | validated |
| mirTarbase | hsa-miR-181a-5p | ZNF844   | 284391 | ENSG00000223547 | 21572407 | validated |
| mirTarbase | hsa-miR-106b-5p | SPATA46  | 284680 | ENSG00000171722 | 17242205 | validated |
| mirTarbase | hsa-miR-21-5p   | ZNF326   | 284695 | ENSG00000162664 | 18591254 | validated |
| mirTarbase | hsa-miR-192-5p  | RIMKLA   | 284716 | ENSG00000177181 | 19074876 | validated |
| mirTarbase | hsa-miR-192-5p  | CCDC150  | 284992 | ENSG00000144395 | 19074876 | validated |
| mirTarbase | hsa-miR-15b-5p  | RNF149   | 284996 | ENSG00000163162 | 23622248 | validated |
| mirTarbase | hsa-miR-301a-3p | RNF149   | 284996 | ENSG00000163162 | 27418678 | validated |
| mirTarbase | hsa-miR-192-5p  | FAM126B  | 285172 | ENSG00000155744 | 19074876 | validated |
| mirTarbase | hsa-miR-21-5p   | FAM126B  | 285172 | ENSG00000155744 | 18591254 | validated |
| mirTarbase | hsa-miR-222-3p  | FAM126B  | 285172 | ENSG00000155744 | 23622248 | validated |
| mirTarbase | hsa-miR-106b-5p | FAM126B  | 285172 | ENSG00000155744 | 22473208 | validated |
| mirTarbase | hsa-miR-192-5p  | EOGT     | 285203 | ENSG00000163378 | 19074876 | validated |

|            |                 |           |        |                 |          |           |
|------------|-----------------|-----------|--------|-----------------|----------|-----------|
| mirTarbase | hsa-miR-301a-3p | EOGT      | 285203 | ENSG00000163378 | 23592263 | validated |
| mirTarbase | hsa-miR-106b-5p | C3orf38   | 285237 | ENSG00000179021 | 24398324 | validated |
| mirTarbase | hsa-miR-106b-5p | SUMF1     | 285362 | ENSG00000144455 | 17242205 | validated |
| mirTarbase | hsa-miR-192-5p  | CYP4V2    | 285440 | ENSG00000145476 | 19074876 | validated |
| mirTarbase | hsa-miR-21-5p   | CYP4V2    | 285440 | ENSG00000145476 | 18591254 | validated |
| mirTarbase | hsa-miR-181a-5p | GPRIN3    | 285513 | ENSG00000185477 | 20371350 | validated |
| mirTarbase | hsa-miR-106b-5p | GPRIN3    | 285513 | ENSG00000185477 | 23313552 | validated |
| mirTarbase | hsa-miR-15b-5p  | FRYL      | 285527 | ENSG00000075539 | 22473208 | validated |
| mirTarbase | hsa-miR-582-3p  | ARL10     | 285598 | ENSG00000175414 | 23592263 | validated |
| mirTarbase | hsa-miR-222-3p  | C5orf51   | 285636 | ENSG00000205765 | 23592263 | validated |
| mirTarbase | hsa-miR-505-3p  | C5orf64   | 285668 |                 | 22012620 | validated |
| mirTarbase | hsa-miR-106b-5p | SREK11P1  | 285672 | ENSG00000153006 | 22100165 | validated |
| mirTarbase | hsa-miR-106b-5p | ZNF454    | 285676 | ENSG00000178187 | 19536157 | validated |
| mirTarbase | hsa-miR-106b-5p | RGBM      | 285704 | ENSG00000174136 | 21572407 | validated |
| mirTarbase | hsa-miR-582-5p  | RPL7L1    | 285855 | ENSG00000146223 | 21572407 | validated |
| mirTarbase | hsa-miR-144-3p  | RPL7L1    | 285855 | ENSG00000146223 | 21572407 | validated |
| mirTarbase | hsa-miR-15b-5p  | TCAF2     | 285966 | ENSG00000170379 | 23622248 | validated |
| mirTarbase | hsa-miR-181a-5p | TUSC1     | 286319 | ENSG00000198680 | 17612493 | validated |
| mirTarbase | hsa-miR-15b-5p  | LURAP1L   | 286343 | ENSG00000153714 | 21572407 | validated |
| mirTarbase | hsa-miR-15b-5p  | YIPF6     | 286451 | ENSG00000181704 | 21572407 | validated |
| mirTarbase | hsa-miR-192-5p  | LIN9      | 286826 | ENSG00000183814 | 19074876 | validated |
| mirTarbase | hsa-miR-192-5p  | TRIM59    | 286827 | ENSG00000213186 | 19074876 | validated |
| mirTarbase | hsa-miR-21-5p   | TRIM59    | 286827 | ENSG00000213186 | 18591254 | validated |
| mirTarbase | hsa-miR-181a-5p | TAAR6     | 319100 | ENSG00000146383 | 17612493 | validated |
| mirTarbase | hsa-miR-192-5p  | MMAB      | 326625 | ENSG00000139428 | 19074876 | validated |
| mirTarbase | hsa-miR-15b-5p  | H3C15     | 333932 | ENSG00000203852 | 23622248 | validated |
| mirTarbase | hsa-miR-192-5p  | CHSY3     | 337876 | ENSG00000198108 | 19074876 | validated |
| mirTarbase | hsa-miR-106b-5p | LUZP2     | 338645 | ENSG00000187398 | 21572407 | validated |
| mirTarbase | hsa-miR-505-3p  | ANKRD13D  | 338692 | ENSG00000172932 | 23622248 | validated |
| mirTarbase | hsa-miR-181a-5p | C1QTNF9   | 338872 | ENSG00000240654 | 17612493 | validated |
| mirTarbase | hsa-miR-106b-5p | CCDC137   | 339230 | ENSG00000185298 | 22473208 | validated |
| mirTarbase | hsa-miR-301a-3p | CCDC137   | 339230 | ENSG00000185298 | 20371350 | validated |
| mirTarbase | hsa-miR-15b-5p  | MSL1      | 339287 | ENSG00000188895 | 23446348 | validated |
| mirTarbase | hsa-miR-582-5p  | ZNF678    | 339500 | ENSG00000181450 | 20371350 | validated |
| mirTarbase | hsa-miR-181a-5p | ZNF678    | 339500 | ENSG00000181450 | 21572407 | validated |
| mirTarbase | hsa-miR-301a-3p | ZNF678    | 339500 | ENSG00000181450 | 20371350 | validated |
| mirTarbase | hsa-miR-106b-5p | SPOPL     | 339745 | ENSG00000144228 | 22473208 | validated |
| mirTarbase | hsa-miR-181a-5p | TMPRSS11A | 339967 | ENSG00000187054 | 17612493 | validated |
| mirTarbase | hsa-miR-505-3p  | ACER2     | 340485 | ENSG00000177076 | 24398324 | validated |
| mirTarbase | hsa-miR-106b-5p | ACER2     | 340485 | ENSG00000177076 | 24398324 | validated |
| mirTarbase | hsa-miR-582-5p  | PABPC1L2A | 340529 | ENSG00000186288 | 23824327 | validated |
| mirTarbase | hsa-miR-144-3p  | DCAF12L2  | 340578 | ENSG00000198354 | 22012620 | validated |
| mirTarbase | hsa-miR-181a-5p | HEPHL1    | 341208 | ENSG00000181333 | 22012620 | validated |
| mirTarbase | hsa-miR-192-5p  | GOLGA6A   | 342096 | ENSG00000159289 | 16822819 | validated |
| mirTarbase | hsa-miR-192-5p  | TMC3      | 342125 | ENSG00000188869 | 19074876 | validated |
| mirTarbase | hsa-miR-144-3p  | ATXN1L    | 342371 | ENSG00000224470 | 21572407 | validated |
| mirTarbase | hsa-miR-301a-3p | SMTNL2    | 342527 | ENSG00000188176 | 23824327 | validated |
| mirTarbase | hsa-miR-106b-5p | STAC2     | 342667 | ENSG00000141750 | 22927820 | validated |
| mirTarbase | hsa-miR-144-3p  | ZNF284    | 342909 | ENSG00000186026 | 20371350 | validated |
| mirTarbase | hsa-miR-15b-5p  | ZNF284    | 342909 | ENSG00000186026 | 27418678 | validated |
| mirTarbase | hsa-miR-181a-5p | PRAMEF9   | 343070 | ENSG00000281573 | 27292025 | validated |
| mirTarbase | hsa-miR-192-5p  | CCDC18    | 343099 | ENSG00000122483 | 19074876 | validated |
| mirTarbase | hsa-miR-106b-5p | HSP90B3P  | 343477 |                 | 17242205 | validated |
| mirTarbase | hsa-miR-15b-5p  | XKR7      | 343702 | ENSG00000260903 | 20371350 | validated |
| mirTarbase | hsa-miR-181a-5p | MTX3      | 345778 | ENSG00000177034 | 22473208 | validated |
| mirTarbase | hsa-miR-15b-5p  | ZNF391    | 346157 | ENSG00000124613 | 20371350 | validated |
| mirTarbase | hsa-miR-192-5p  | KIF24     | 347240 | ENSG00000186638 | 19074876 | validated |
| mirTarbase | hsa-miR-144-3p  | LANCL3    | 347404 | ENSG00000147036 | 27418678 | validated |
| mirTarbase | hsa-miR-582-5p  | ANKDD1A   | 348094 | ENSG00000166839 | 27292025 | validated |
| mirTarbase | hsa-miR-192-5p  | GEN1      | 348654 | ENSG00000178295 | 19074876 | validated |
| mirTarbase | hsa-miR-106b-5p | WDR53     | 348793 | ENSG00000185798 | 23824327 | validated |
| mirTarbase | hsa-miR-181a-5p | ZNF445    | 353274 | ENSG00000185219 | 20371350 | validated |
| mirTarbase | hsa-miR-505-3p  | ZNF445    | 353274 | ENSG00000185219 | 23824327 | validated |
| mirTarbase | hsa-miR-192-5p  | TICAM2    | 353376 | ENSG00000243414 | 19074876 | validated |
| mirTarbase | hsa-miR-21-5p   | TICAM2    | 353376 | ENSG00000243414 | 25327529 | validated |
| mirTarbase | hsa-miR-192-5p  | RFLNB     | 359845 | ENSG00000183688 | 19074876 | validated |
| mirTarbase | hsa-miR-222-3p  | IRF2BP2   | 359948 | ENSG00000168264 | 23622248 | validated |
| mirTarbase | hsa-miR-144-3p  | NANOGBN   | 360030 | ENSG00000205857 | 22012620 | validated |
| mirTarbase | hsa-miR-192-5p  | FAM111B   | 374393 | ENSG00000189057 | 19074876 | validated |
| mirTarbase | hsa-miR-106b-5p | DNAJB13   | 374407 | ENSG00000187726 | 23313552 | validated |
| mirTarbase | hsa-miR-144-3p  | TEX9      | 374618 | ENSG00000151575 | 19536157 | validated |



|            |                 |                |        |                 |          |           |
|------------|-----------------|----------------|--------|-----------------|----------|-----------|
| mirTarbase | hsa-miR-181a-5p | ZNF699         | 374879 | ENSG00000196110 | 22012620 | validated |
| mirTarbase | hsa-miR-106b-5p | SBSN           | 374897 | ENSG00000189001 | 17242205 | validated |
| mirTarbase | hsa-miR-181a-5p | ZNF829         | 374899 | ENSG00000185869 | 23824327 | validated |
| mirTarbase | hsa-miR-106b-5p | DRAXIN         | 374946 | ENSG00000162490 | 23313552 | validated |
| mirTarbase | hsa-miR-15b-5p  | MIGA1          | 374986 | ENSG00000180488 | 22473208 | validated |
| mirTarbase | hsa-miR-326     | STUM           | 375057 | ENSG00000203685 | 19536157 | validated |
| mirTarbase | hsa-miR-106b-5p | FAM89A         | 375061 | ENSG00000182118 | 21572407 | validated |
| mirTarbase | hsa-miR-505-3p  | FAM89A         | 375061 | ENSG00000182118 | 23824327 | validated |
| mirTarbase | hsa-miR-15b-5p  | ANKRD36        | 375248 | ENSG00000135976 | 23824327 | validated |
| mirTarbase | hsa-miR-301a-3p | RBM43          | 375287 | ENSG00000184898 | 21572407 | validated |
| mirTarbase | hsa-miR-192-5p  | LHFPL4         | 375323 | ENSG00000156959 | 20371350 | validated |
| mirTarbase | hsa-miR-192-5p  | C5orf34        | 375444 | ENSG00000172244 | 19074876 | validated |
| mirTarbase | hsa-miR-505-3p  | GJB7           | 375519 | ENSG00000164411 | 22012620 | validated |
| mirTarbase | hsa-miR-181a-5p | GJB7           | 375519 | ENSG00000164411 | 22012620 | validated |
| mirTarbase | hsa-miR-21-5p   | PTAR1          | 375743 | ENSG00000188647 | 18591254 | validated |
| mirTarbase | hsa-miR-15b-5p  | PTAR1          | 375743 | ENSG00000188647 | 23622248 | validated |
| mirTarbase | hsa-miR-15b-5p  | RAB15          | 376267 | ENSG00000139998 | 19536157 | validated |
| mirTarbase | hsa-miR-192-5p  | CA13           | 377677 | ENSG00000185015 | 19074876 | validated |
| mirTarbase | hsa-miR-18a-5p  | CA13           | 377677 | ENSG00000185015 | 20371350 | validated |
| mirTarbase | hsa-miR-505-3p  | SOGA3          | 387104 | ENSG00000214338 | 27418678 | validated |
| mirTarbase | hsa-miR-192-5p  | CEP85L         | 387119 | ENSG00000111860 | 22100165 | validated |
| mirTarbase | hsa-miR-106b-5p | C6orf120       | 387263 | ENSG00000185127 | 23622248 | validated |
| mirTarbase | hsa-miR-15b-5p  | TMEM189        | 387521 | ENSG00000240849 | 23592263 | validated |
| mirTarbase | hsa-miR-15b-5p  | TMEM189-UBE2V1 | 387522 | ENSG00000124208 | 23592263 | validated |
| mirTarbase | hsa-miR-301a-3p | CLEC12B        | 387837 | ENSG00000256660 | 22012620 | validated |
| mirTarbase | hsa-miR-106b-5p | CLEC12B        | 387837 | ENSG00000256660 | 22012620 | validated |
| mirTarbase | hsa-miR-106b-5p | SHISA2         | 387914 | ENSG00000180730 | 23622248 | validated |
| mirTarbase | hsa-miR-222-3p  | SHISA2         | 387914 | ENSG00000180730 | 23622248 | validated |
| mirTarbase | hsa-miR-192-5p  | NHLRC3         | 387921 | ENSG00000188811 | 19074876 | validated |
| mirTarbase | hsa-miR-106b-5p | NHLRC3         | 387921 | ENSG00000188811 | 22473208 | validated |
| mirTarbase | hsa-miR-181a-5p | NHLRC3         | 387921 | ENSG00000188811 | 22473208 | validated |
| mirTarbase | hsa-miR-21-5p   | CCDC9B         | 388115 | ENSG00000188549 | 23592263 | validated |
| mirTarbase | hsa-miR-181a-5p | ZNF788         | 388507 |                 | 24398324 | validated |
| mirTarbase | hsa-miR-106b-5p | BLOC1S3        | 388552 | ENSG00000189114 | 22473208 | validated |
| mirTarbase | hsa-miR-144-3p  | ZNF749         | 388567 | ENSG00000186230 | 20371350 | validated |
| mirTarbase | hsa-miR-144-3p  | DIPK1A         | 388650 | ENSG00000154511 | 20371350 | validated |
| mirTarbase | hsa-miR-192-5p  | C1orf53        | 388722 | ENSG00000203724 | 19074876 | validated |
| mirTarbase | hsa-miR-192-5p  | VGLL3          | 389136 | ENSG00000206538 | 19074876 | validated |
| mirTarbase | hsa-miR-505-3p  | BEND4          | 389206 | ENSG00000188848 | 21572407 | validated |
| mirTarbase | hsa-miR-15b-5p  | LIN28B         | 389421 | ENSG00000187772 | 23622248 | validated |
| mirTarbase | hsa-miR-21-5p   | SAMD5          | 389432 | ENSG00000203727 | 18591254 | validated |
| mirTarbase | hsa-miR-106b-5p | GTF2IRD2B      | 389524 | ENSG00000174428 | 23313552 | validated |
| mirTarbase | hsa-miR-106b-5p | NUGGC          | 389643 | ENSG00000189233 | 23313552 | validated |
| mirTarbase | hsa-miR-15b-5p  | XKR9           | 389668 | ENSG00000221947 | 23622248 | validated |
| mirTarbase | hsa-miR-106b-5p | RBM12B         | 389677 | ENSG00000183808 | 23622248 | validated |
| mirTarbase | hsa-miR-582-5p  | RBM12B         | 389677 | ENSG00000183808 | 20371350 | validated |
| mirTarbase | hsa-miR-106b-5p | OR52K1         | 390036 | ENSG00000196778 | 17242205 | validated |
| mirTarbase | hsa-miR-106b-5p | ZNF805         | 390980 | ENSG00000204524 | 21572407 | validated |
| mirTarbase | hsa-miR-222-3p  | ZNF805         | 390980 | ENSG00000204524 | 20371350 | validated |
| mirTarbase | hsa-miR-106b-5p | FAM102A        | 399665 | ENSG00000167106 | 22473208 | validated |
| mirTarbase | hsa-miR-106b-5p | PATE2          | 399967 | ENSG00000196844 | 23622248 | validated |
| mirTarbase | hsa-miR-21-5p   | PATE2          | 399967 | ENSG00000196844 | 22012620 | validated |
| mirTarbase | hsa-miR-15b-5p  | MED11          | 400569 | ENSG00000161920 | 22473208 | validated |
| mirTarbase | hsa-miR-222-3p  | ZNF772         | 400720 | ENSG00000197128 | 23622248 | validated |
| mirTarbase | hsa-miR-326     | ZNF772         | 400720 | ENSG00000197128 | 23446348 | validated |
| mirTarbase | hsa-miR-181a-5p | PRAMEF4        | 400735 | ENSG00000243073 | 27292025 | validated |
| mirTarbase | hsa-miR-15b-5p  | C1orf226       | 400793 | ENSG00000239887 | 23592263 | validated |
| mirTarbase | hsa-miR-192-5p  | EML6           | 400954 | ENSG00000214595 | 22100165 | validated |
| mirTarbase | hsa-miR-106b-5p | LRRD1          | 401387 | ENSG00000240720 | 23313552 | validated |
| mirTarbase | hsa-miR-144-3p  | SAMD12         | 401474 | ENSG00000177570 | 21572407 | validated |
| mirTarbase | hsa-miR-106b-5p | SAMD12         | 401474 | ENSG00000177570 | 21572407 | validated |
| mirTarbase | hsa-miR-326     | TOMM5          | 401505 | ENSG00000175768 | 23446348 | validated |
| mirTarbase | hsa-miR-21-5p   | SNX30          | 401548 | ENSG00000148158 | 18591254 | validated |
| mirTarbase | hsa-miR-192-5p  | ZBTB34         | 403341 | ENSG00000177125 | 19074876 | validated |
| mirTarbase | hsa-miR-15b-5p  | ZBTB34         | 403341 | ENSG00000177125 | 23446348 | validated |
| mirTarbase | hsa-miR-192-5p  | LCN10          | 414332 | ENSG00000187922 | 19536157 | validated |
| mirTarbase | hsa-miR-15b-5p  | CCDC88C        | 440193 | ENSG00000015133 | 20371350 | validated |
| mirTarbase | hsa-miR-181a-5p | CCDC88C        | 440193 | ENSG00000015133 | 22473208 | validated |
| mirTarbase | hsa-miR-181a-5p | GOLGA8B        | 440270 | ENSG00000215252 | 22473208 | validated |
| mirTarbase | hsa-miR-212-3p  | ZNF724         | 440519 | ENSG00000196081 | 20371350 | validated |
| mirTarbase | hsa-miR-181a-5p | PRAMEF11       | 440560 | ENSG00000239810 | 27292025 | validated |

|            |                 |                |           |                 |          |           |
|------------|-----------------|----------------|-----------|-----------------|----------|-----------|
| mirTarbase | hsa-miR-106b-5p | ZYG11A         | 440590    | ENSG00000203995 | 23313552 | validated |
| mirTarbase | hsa-miR-192-5p  | RP9P           | 441212    |                 | 19074876 | validated |
| mirTarbase | hsa-miR-582-3p  | ZNF716         | 441234    | ENSG00000182111 | 23824327 | validated |
| mirTarbase | hsa-miR-582-5p  | PGAM4          | 441531    | ENSG00000226784 | 21572407 | validated |
| mirTarbase | hsa-miR-106b-5p | C18orf32       | 497661    | ENSG00000177576 | 20371350 | validated |
| mirTarbase | hsa-miR-18a-5p  | CXorf40B       | 541578    | ENSG00000197021 | 23622248 | validated |
| mirTarbase | hsa-miR-15b-5p  | ATXN7L3B       | 552889    | ENSG00000253719 | 23592263 | validated |
| mirTarbase | hsa-miR-582-5p  | ATXN7L3B       | 552889    | ENSG00000253719 | 21572407 | validated |
| mirTarbase | hsa-miR-106b-5p | ATXN7L3B       | 552889    | ENSG00000253719 | 23592263 | validated |
| mirTarbase | hsa-miR-106b-5p | GDF5OS         | 554250    |                 | 23313552 | validated |
| mirTarbase | hsa-miR-106b-5p | FBXO48         | 554251    | ENSG00000204923 | 22473208 | validated |
| mirTarbase | hsa-miR-505-3p  | H4C15          | 554313    | ENSG00000270276 | 23622248 | validated |
| mirTarbase | hsa-miR-222-3p  | H4C15          | 554313    | ENSG00000270276 | 23622248 | validated |
| mirTarbase | hsa-miR-144-3p  | C1orf147       | 574431    |                 | 23446348 | validated |
| mirTarbase | hsa-miR-21-5p   | C1orf147       | 574431    |                 | 22012620 | validated |
| mirTarbase | hsa-miR-15b-5p  | FAM229B        | 619208    | ENSG00000203778 | 21572407 | validated |
| mirTarbase | hsa-miR-192-5p  | ZNF704         | 619279    | ENSG00000164684 | 19074876 | validated |
| mirTarbase | hsa-miR-15b-5p  | ZNF704         | 619279    | ENSG00000164684 | 21572407 | validated |
| mirTarbase | hsa-miR-192-5p  | FAM110C        | 642273    | ENSG00000184731 | 19074876 | validated |
| mirTarbase | hsa-miR-181a-5p | FKBP1C         | 642489    |                 | 22291592 | validated |
| mirTarbase | hsa-miR-181a-5p | ZNF487         | 642819    | ENSG00000243660 | 24398324 | validated |
| mirTarbase | hsa-miR-582-3p  | SMIM15         | 643155    | ENSG00000188725 | 23824327 | validated |
| mirTarbase | hsa-miR-21-5p   | CCT6P1         | 643253    |                 | 18591254 | validated |
| mirTarbase | hsa-miR-326     | MACF1          | 643314    | ENSG00000127603 | 23824327 | validated |
| mirTarbase | hsa-miR-222-3p  | FAM83G         | 644815    | ENSG00000188522 | 23622248 | validated |
| mirTarbase | hsa-miR-181a-5p | PRAMEF25       | 645359    | ENSG00000276299 | 27292025 | validated |
| mirTarbase | hsa-miR-181a-5p | PRAMEF26       | 645359    | ENSG00000280267 | 27292025 | validated |
| mirTarbase | hsa-miR-106b-5p | TMEM200C       | 645369    | ENSG00000206432 | 21572407 | validated |
| mirTarbase | hsa-miR-106b-5p | LINC00598      | 646982    |                 | 23313552 | validated |
| mirTarbase | hsa-miR-192-5p  | C6orf132       | 647024    | ENSG00000188112 | 22012620 | validated |
| mirTarbase | hsa-miR-106b-5p | ANKRD33B       | 651746    | ENSG00000164236 | 23592263 | validated |
| mirTarbase | hsa-miR-21-5p   | ZBTB8A         | 653121    | ENSG00000160062 | 18591254 | validated |
| mirTarbase | hsa-miR-301a-3p | ZBTB8A         | 653121    | ENSG00000160062 | 23824327 | validated |
| mirTarbase | hsa-miR-301a-3p | SFTPA1         | 653509    | ENSG00000122852 | 21572407 | validated |
| mirTarbase | hsa-miR-15b-5p  | PHLDB3         | 653583    | ENSG00000176531 | 23622248 | validated |
| mirTarbase | hsa-miR-181a-5p | PRAMEF15       | 653619    | ENSG00000204501 | 27292025 | validated |
| mirTarbase | hsa-miR-21-5p   | GXYLT2         | 727936    | ENSG00000172986 | 20371350 | validated |
| mirTarbase | hsa-miR-222-3p  | MROH1          | 727957    | ENSG00000179832 | 23622248 | validated |
| mirTarbase | hsa-miR-192-5p  | ZBTB8B         | 728116    | ENSG00000273274 | 23824327 | validated |
| mirTarbase | hsa-miR-106b-5p | GTF2H2         | 728340    | ENSG00000276910 | 23824327 | validated |
| mirTarbase | hsa-miR-106b-5p | GTF2H2C        | 728340    | ENSG00000183474 | 23824327 | validated |
| mirTarbase | hsa-miR-296-5p  | DNLZ           | 728489    | ENSG00000213221 | 23592263 | validated |
| mirTarbase | hsa-miR-18a-5p  | WDR82P1        | 728505    |                 | 23592263 | validated |
| mirTarbase | hsa-miR-212-3p  | CCDC169        | 728591    | ENSG00000242715 | 22012620 | validated |
| mirTarbase | hsa-miR-106b-5p | CCDC30         | 728621    | ENSG00000186409 | 22927820 | validated |
| mirTarbase | hsa-miR-301a-3p | SLC35E2B       | 728661    | ENSG00000189339 | 23824327 | validated |
| mirTarbase | hsa-miR-15b-5p  | SLC35E2B       | 728661    | ENSG00000189339 | 19536157 | validated |
| mirTarbase | hsa-miR-505-3p  | NBPF8          | 728841    | ENSG00000270231 | 22100165 | validated |
| mirTarbase | hsa-miR-192-5p  | FAM182B        | 728882    |                 | 23446348 | validated |
| mirTarbase | hsa-miR-505-3p  | CASTOR2        | 729438    | ENSG00000274070 | 22100165 | validated |
| mirTarbase | hsa-miR-326     | CASTOR2        | 729438    | ENSG00000274070 | 26701625 | validated |
| mirTarbase | hsa-miR-106b-5p | TMEM242        | 729515    | ENSG00000215712 | 23446348 | validated |
| mirTarbase | hsa-miR-301a-3p | PRR23A         | 729627    | ENSG00000206260 | 23824327 | validated |
| mirTarbase | hsa-miR-192-5p  | MOSMO          | 730094    | ENSG00000185716 | 19074876 | validated |
| mirTarbase | hsa-miR-106b-5p | MOSMO          | 730094    | ENSG00000185716 | 21572407 | validated |
| mirTarbase | hsa-miR-15b-5p  | POM121C        | 100101267 | ENSG00000272391 | 23446348 | validated |
| mirTarbase | hsa-miR-326     | HOTAIR         | 100124700 | ENSG00000228630 | 26183397 | validated |
| mirTarbase | hsa-miR-505-3p  | PET117         | 100303755 | ENSG00000232838 | 19536157 | validated |
| mirTarbase | hsa-miR-301a-3p | ARL17B         | 100506084 | ENSG00000276276 | 23824327 | validated |
| mirTarbase | hsa-miR-212-3p  | OCLN           | 100506658 | ENSG00000273814 | 21572407 | validated |
| mirTarbase | hsa-miR-326     | C8orf17        | 100507249 |                 | 23824327 | validated |
| mirTarbase | hsa-miR-21-5p   | C8orf17        | 100507249 |                 | 23313552 | validated |
| mirTarbase | hsa-miR-18a-5p  | ARPIN-AP3S2    | 100526783 | ENSG00000250021 | 20371350 | validated |
| mirTarbase | hsa-miR-106b-5p | RPL17-C18orf32 | 100526842 | ENSG00000215472 | 20371350 | validated |
| mirTarbase | hsa-miR-301a-3p | POC1B-GALNT4   | 100528030 | ENSG00000259075 | 24398324 | validated |
| mirTarbase | hsa-miR-144-3p  | BCL2L2-PABPN1  | 100529063 | ENSG00000258643 | 23592263 | validated |
| mirTarbase | hsa-miR-15b-5p  | HSPE1-MOB4     | 100529241 | ENSG00000270757 | 24398324 | validated |
| mirTarbase | hsa-miR-144-3p  | HSPE1-MOB4     | 100529241 | ENSG00000270757 | 20371350 | validated |
| mirTarbase | hsa-miR-144-3p  | NDUFC2-KCTD14  | 100532726 | ENSG00000259112 | 23592263 | validated |
| mirTarbase | hsa-miR-181a-5p | RTEL1-TNFRSF6B | 100533107 |                 | 17612493 | validated |
| tarbase    | hsa-miR-21-5p   | 39701          |           |                 |          | validated |

|         |                 |          |       |                 |           |
|---------|-----------------|----------|-------|-----------------|-----------|
| tarbase | hsa-miR-192-5p  | AB002442 |       |                 | validated |
| tarbase | hsa-miR-192-5p  | AB002443 |       |                 | validated |
| tarbase | hsa-miR-192-5p  | AB033076 |       |                 | validated |
| tarbase | hsa-miR-192-5p  | AB040883 |       |                 | validated |
| tarbase | hsa-miR-192-5p  | AF075045 |       |                 | validated |
| tarbase | hsa-miR-192-5p  | AF075069 |       |                 | validated |
| tarbase | hsa-miR-192-5p  | AF078844 |       |                 | validated |
| tarbase | hsa-miR-192-5p  | AF085923 |       |                 | validated |
| tarbase | hsa-miR-192-5p  | AF086032 |       |                 | validated |
| tarbase | hsa-miR-192-5p  | AF086173 |       |                 | validated |
| tarbase | hsa-miR-192-5p  | AF086431 |       |                 | validated |
| tarbase | hsa-miR-192-5p  | AF086561 |       |                 | validated |
| tarbase | hsa-miR-192-5p  | AF125104 |       |                 | validated |
| tarbase | hsa-miR-192-5p  | AF131784 |       |                 | validated |
| tarbase | hsa-miR-192-5p  | AF131846 |       |                 | validated |
| tarbase | hsa-miR-192-5p  | AJ227908 |       |                 | validated |
| tarbase | hsa-miR-192-5p  | AK021796 |       |                 | validated |
| tarbase | hsa-miR-192-5p  | AK022645 |       |                 | validated |
| tarbase | hsa-miR-192-5p  | AK023367 |       |                 | validated |
| tarbase | hsa-miR-192-5p  | AK024121 |       |                 | validated |
| tarbase | hsa-miR-192-5p  | AK024556 |       |                 | validated |
| tarbase | hsa-miR-192-5p  | AK024927 |       |                 | validated |
| tarbase | hsa-miR-192-5p  | AK054764 |       |                 | validated |
| tarbase | hsa-miR-192-5p  | AK055620 |       |                 | validated |
| tarbase | hsa-miR-192-5p  | AK055807 |       |                 | validated |
| tarbase | hsa-miR-192-5p  | AK057062 |       |                 | validated |
| tarbase | hsa-miR-192-5p  | AK057167 |       |                 | validated |
| tarbase | hsa-miR-192-5p  | AK057710 |       |                 | validated |
| tarbase | hsa-miR-192-5p  | AK057835 |       |                 | validated |
| tarbase | hsa-miR-192-5p  | AK075186 |       |                 | validated |
| tarbase | hsa-miR-192-5p  | AK090904 |       |                 | validated |
| tarbase | hsa-miR-192-5p  | AK092985 |       |                 | validated |
| tarbase | hsa-miR-192-5p  | AK093202 |       |                 | validated |
| tarbase | hsa-miR-192-5p  | AK095096 |       |                 | validated |
| tarbase | hsa-miR-192-5p  | AK095149 |       |                 | validated |
| tarbase | hsa-miR-192-5p  | AK098664 |       |                 | validated |
| tarbase | hsa-miR-21-5p   | AKT-2    |       |                 | validated |
| tarbase | hsa-miR-192-5p  | AL049354 |       |                 | validated |
| tarbase | hsa-miR-192-5p  | AL049452 |       |                 | validated |
| tarbase | hsa-miR-192-5p  | AL078636 |       |                 | validated |
| tarbase | hsa-miR-192-5p  | AL110163 |       |                 | validated |
| tarbase | hsa-miR-192-5p  | AL133090 |       |                 | validated |
| tarbase | hsa-miR-192-5p  | AL133577 |       |                 | validated |
| tarbase | hsa-miR-192-5p  | AL137310 |       |                 | validated |
| tarbase | hsa-miR-192-5p  | AL137333 |       |                 | validated |
| tarbase | hsa-miR-192-5p  | AL137347 |       |                 | validated |
| tarbase | hsa-miR-192-5p  | AL137535 |       |                 | validated |
| tarbase | hsa-miR-192-5p  | BC002811 |       |                 | validated |
| tarbase | hsa-miR-192-5p  | BC004287 |       |                 | validated |
| tarbase | hsa-miR-192-5p  | BC031660 |       |                 | validated |
| tarbase | hsa-miR-192-5p  | BC031864 |       |                 | validated |
| tarbase | hsa-miR-192-5p  | BC033326 |       |                 | validated |
| tarbase | hsa-miR-192-5p  | BC039371 |       |                 | validated |
| tarbase | hsa-miR-192-5p  | BC040287 |       |                 | validated |
| tarbase | hsa-miR-192-5p  | BC041380 |       |                 | validated |
| tarbase | hsa-miR-192-5p  | BX487921 |       |                 | validated |
| tarbase | hsa-miR-21-5p   | MMP16    | 4325  | ENSG00000156103 | validated |
| tarbase | hsa-miR-21-5p   | ACAP2    | 23527 | ENSG00000114331 | validated |
| tarbase | hsa-miR-18a-5p  | SCYL3    | 57147 | ENSG00000000457 | validated |
| tarbase | hsa-miR-212-3p  | SCYL3    | 57147 | ENSG00000000457 | validated |
| tarbase | hsa-miR-21-5p   | SCYL3    | 57147 | ENSG00000000457 | validated |
| tarbase | hsa-miR-21-5p   | C1orf112 | 55732 | ENSG00000000460 | validated |
| tarbase | hsa-miR-15b-5p  | FUCA2    | 2519  | ENSG00000001036 | validated |
| tarbase | hsa-miR-18a-5p  | GCLC     | 2729  | ENSG00000001084 | validated |
| tarbase | hsa-miR-21-5p   | GCLC     | 2729  | ENSG00000001084 | validated |
| tarbase | hsa-miR-212-3p  | NFYA     | 4800  | ENSG00000001167 | validated |
| tarbase | hsa-miR-301a-3p | NFYA     | 4800  | ENSG00000001167 | validated |
| tarbase | hsa-miR-18a-5p  | NIPAL3   | 57185 | ENSG00000001461 | validated |
| tarbase | hsa-miR-106b-5p | ENPP4    | 22875 | ENSG00000001561 | validated |
| tarbase | hsa-miR-582-5p  | ENPP4    | 22875 | ENSG00000001561 | validated |
| tarbase | hsa-miR-15b-5p  | ENPP4    | 22875 | ENSG00000001561 | validated |

|         |                 |          |       |                |           |
|---------|-----------------|----------|-------|----------------|-----------|
| tarbase | hsa-miR-15b-5p  | ANKIB1   | 54467 | ENSG0000001629 | validated |
| tarbase | hsa-miR-181a-5p | ANKIB1   | 54467 | ENSG0000001629 | validated |
| tarbase | hsa-miR-212-3p  | ANKIB1   | 54467 | ENSG0000001629 | validated |
| tarbase | hsa-miR-301a-3p | ANKIB1   | 54467 | ENSG0000001629 | validated |
| tarbase | hsa-miR-582-5p  | CYP51A1  | 1595  | ENSG0000001630 | validated |
| tarbase | hsa-miR-181a-5p | KRIT1    | 889   | ENSG0000001631 | validated |
| tarbase | hsa-miR-192-5p  | KRIT1    | 889   | ENSG0000001631 | validated |
| tarbase | hsa-miR-301a-3p | CD99     | 4267  | ENSG0000002586 | validated |
| tarbase | hsa-miR-326     | HS3ST1   | 9957  | ENSG0000002587 | validated |
| tarbase | hsa-miR-18a-5p  | M6PR     | 4074  | ENSG0000003056 | validated |
| tarbase | hsa-miR-301a-3p | DBNDD1   | 79007 | ENSG0000003249 | validated |
| tarbase | hsa-miR-15b-5p  | ALS2     | 57679 | ENSG0000003393 | validated |
| tarbase | hsa-miR-21-5p   | ALS2     | 57679 | ENSG0000003393 | validated |
| tarbase | hsa-miR-15b-5p  | CFLAR    | 8837  | ENSG0000003402 | validated |
| tarbase | hsa-miR-212-3p  | CFLAR    | 8837  | ENSG0000003402 | validated |
| tarbase | hsa-miR-326     | CFLAR    | 8837  | ENSG0000003402 | validated |
| tarbase | hsa-miR-15b-5p  | TFPI     | 7035  | ENSG0000003436 | validated |
| tarbase | hsa-miR-181a-5p | TFPI     | 7035  | ENSG0000003436 | validated |
| tarbase | hsa-miR-181a-5p | SLC7A2   | 6542  | ENSG0000003989 | validated |
| tarbase | hsa-miR-15b-5p  | SARM1    | 23098 | ENSG0000004139 | validated |
| tarbase | hsa-miR-106b-5p | POLDIP2  | 26073 | ENSG0000004142 | validated |
| tarbase | hsa-miR-212-3p  | AK2      | 204   | ENSG0000004455 | validated |
| tarbase | hsa-miR-301a-3p | AK2      | 204   | ENSG0000004455 | validated |
| tarbase | hsa-miR-106b-5p | CD38     | 952   | ENSG0000004468 | validated |
| tarbase | hsa-miR-21-5p   | CD38     | 952   | ENSG0000004468 | validated |
| tarbase | hsa-miR-181a-5p | FKBP4    | 2288  | ENSG0000004478 | validated |
| tarbase | hsa-miR-212-3p  | FKBP4    | 2288  | ENSG0000004478 | validated |
| tarbase | hsa-miR-106b-5p | KDM1A    | 23028 | ENSG0000004487 | validated |
| tarbase | hsa-miR-18a-5p  | KDM1A    | 23028 | ENSG0000004487 | validated |
| tarbase | hsa-miR-15b-5p  | RBM6     | 10180 | ENSG0000004534 | validated |
| tarbase | hsa-miR-181a-5p | RBM6     | 10180 | ENSG0000004534 | validated |
| tarbase | hsa-miR-181a-5p | NDUFAB1  | 4706  | ENSG0000004779 | validated |
| tarbase | hsa-miR-106b-5p | PDK4     | 5166  | ENSG0000004799 | validated |
| tarbase | hsa-miR-326     | SLC25A13 | 10165 | ENSG0000004864 | validated |
| tarbase | hsa-miR-582-5p  | ST7      | 7982  | ENSG0000004866 | validated |
| tarbase | hsa-miR-181a-5p | CDC27    | 996   | ENSG0000004897 | validated |
| tarbase | hsa-miR-582-5p  | CDC27    | 996   | ENSG0000004897 | validated |
| tarbase | hsa-miR-212-3p  | CDC27    | 996   | ENSG0000004897 | validated |
| tarbase | hsa-miR-18a-5p  | HCCS     | 3052  | ENSG0000004961 | validated |
| tarbase | hsa-miR-301a-3p | HCCS     | 3052  | ENSG0000004961 | validated |
| tarbase | hsa-miR-181a-5p | DVL2     | 1856  | ENSG0000004975 | validated |
| tarbase | hsa-miR-582-3p  | SKAP2    | 8935  | ENSG0000005020 | validated |
| tarbase | hsa-miR-106b-5p | DHX33    | 56919 | ENSG0000005100 | validated |
| tarbase | hsa-miR-15b-5p  | DHX33    | 56919 | ENSG0000005100 | validated |
| tarbase | hsa-miR-181a-5p | DHX33    | 56919 | ENSG0000005100 | validated |
| tarbase | hsa-miR-582-3p  | DHX33    | 56919 | ENSG0000005100 | validated |
| tarbase | hsa-miR-296-5p  | RPAP3    | 79657 | ENSG0000005175 | validated |
| tarbase | hsa-miR-181a-5p | RPAP3    | 79657 | ENSG0000005175 | validated |
| tarbase | hsa-miR-212-3p  | REXO5    | 81691 | ENSG0000005189 | validated |
| tarbase | hsa-miR-15b-5p  | SPPL2B   | 56928 | ENSG0000005206 | validated |
| tarbase | hsa-miR-326     | SPPL2B   | 56928 | ENSG0000005206 | validated |
| tarbase | hsa-miR-212-3p  | COPZ2    | 51226 | ENSG0000005243 | validated |
| tarbase | hsa-miR-106b-5p | PRKAR2B  | 5577  | ENSG0000005249 | validated |
| tarbase | hsa-miR-181a-5p | PRKAR2B  | 5577  | ENSG0000005249 | validated |
| tarbase | hsa-miR-15b-5p  | CREBBP   | 1387  | ENSG0000005339 | validated |
| tarbase | hsa-miR-106b-5p | KMT2E    | 55904 | ENSG0000005483 | validated |
| tarbase | hsa-miR-144-3p  | KMT2E    | 55904 | ENSG0000005483 | validated |
| tarbase | hsa-miR-582-5p  | KMT2E    | 55904 | ENSG0000005483 | validated |
| tarbase | hsa-miR-181a-5p | IBTK     | 25998 | ENSG0000005700 | validated |
| tarbase | hsa-miR-18a-5p  | IBTK     | 25998 | ENSG0000005700 | validated |
| tarbase | hsa-miR-181a-5p | MYCBP2   | 23077 | ENSG0000005810 | validated |
| tarbase | hsa-miR-301a-3p | MYCBP2   | 23077 | ENSG0000005810 | validated |
| tarbase | hsa-miR-106b-5p | FBXL3    | 26224 | ENSG0000005812 | validated |
| tarbase | hsa-miR-181a-5p | FBXL3    | 26224 | ENSG0000005812 | validated |
| tarbase | hsa-miR-212-3p  | FBXL3    | 26224 | ENSG0000005812 | validated |
| tarbase | hsa-miR-301a-3p | FBXL3    | 26224 | ENSG0000005812 | validated |
| tarbase | hsa-miR-21-5p   | FBXL3    | 26224 | ENSG0000005812 | validated |
| tarbase | hsa-miR-192-5p  | ZFX      | 7543  | ENSG0000005889 | validated |
| tarbase | hsa-miR-582-3p  | ZFX      | 7543  | ENSG0000005889 | validated |
| tarbase | hsa-miR-301a-3p | LAMP2    | 3920  | ENSG0000005893 | validated |
| tarbase | hsa-miR-15b-5p  | GDE1     | 51573 | ENSG0000006007 | validated |

|         |                 |           |        |                 |           |
|---------|-----------------|-----------|--------|-----------------|-----------|
| tarbase | hsa-miR-15b-5p  | OSBPL7    | 114881 | ENSG00000006025 | validated |
| tarbase | hsa-miR-301a-3p | MAP3K14   | 9020   | ENSG00000006062 | validated |
| tarbase | hsa-miR-212-3p  | CACNG3    | 10368  | ENSG00000006116 | validated |
| tarbase | hsa-miR-181a-5p | AP2B1     | 163    | ENSG00000006125 | validated |
| tarbase | hsa-miR-212-3p  | TAC1      | 6863   | ENSG00000006128 | validated |
| tarbase | hsa-miR-15b-5p  | TNFRSF12A | 51330  | ENSG00000006327 | validated |
| tarbase | hsa-miR-106b-5p | MAP3K9    | 4293   | ENSG00000006432 | validated |
| tarbase | hsa-miR-15b-5p  | MAP3K9    | 4293   | ENSG00000006432 | validated |
| tarbase | hsa-miR-18a-5p  | MAP3K9    | 4293   | ENSG00000006432 | validated |
| tarbase | hsa-miR-21-5p   | RALA      | 5898   | ENSG00000006451 | validated |
| tarbase | hsa-miR-106b-5p | ETV1      | 2115   | ENSG00000006468 | validated |
| tarbase | hsa-miR-582-5p  | ETV1      | 2115   | ENSG00000006468 | validated |
| tarbase | hsa-miR-222-3p  | ETV1      | 2115   | ENSG00000006468 | validated |
| tarbase | hsa-miR-15b-5p  | AGK       | 55750  | ENSG00000006530 | validated |
| tarbase | hsa-miR-21-5p   | TTC22     | 55001  | ENSG00000006555 | validated |
| tarbase | hsa-miR-181a-5p | PHTF2     | 57157  | ENSG00000006576 | validated |
| tarbase | hsa-miR-212-3p  | PHTF2     | 57157  | ENSG00000006576 | validated |
| tarbase | hsa-miR-106b-5p | FARP2     | 9855   | ENSG00000006607 | validated |
| tarbase | hsa-miR-181a-5p | FARP2     | 9855   | ENSG00000006607 | validated |
| tarbase | hsa-miR-181a-5p | GGCT      | 79017  | ENSG00000006625 | validated |
| tarbase | hsa-miR-222-3p  | GGCT      | 79017  | ENSG00000006625 | validated |
| tarbase | hsa-miR-301a-3p | GGCT      | 79017  | ENSG00000006625 | validated |
| tarbase | hsa-miR-106b-5p | IFRD1     | 3475   | ENSG00000006652 | validated |
| tarbase | hsa-miR-21-5p   | LGALS14   | 56891  | ENSG00000006659 | validated |
| tarbase | hsa-miR-106b-5p | COX10     | 1352   | ENSG00000006695 | validated |
| tarbase | hsa-miR-106b-5p | PAF1      | 54623  | ENSG00000006712 | validated |
| tarbase | hsa-miR-582-3p  | PAF1      | 54623  | ENSG00000006712 | validated |
| tarbase | hsa-miR-21-5p   | VPS41     | 27072  | ENSG00000006715 | validated |
| tarbase | hsa-miR-505-3p  | VPS41     | 27072  | ENSG00000006715 | validated |
| tarbase | hsa-miR-15b-5p  | PNPLA4    | 8228   | ENSG00000006757 | validated |
| tarbase | hsa-miR-144-3p  | ADIPOR2   | 79602  | ENSG00000006831 | validated |
| tarbase | hsa-miR-181a-5p | ADIPOR2   | 79602  | ENSG00000006831 | validated |
| tarbase | hsa-miR-582-5p  | ADIPOR2   | 79602  | ENSG00000006831 | validated |
| tarbase | hsa-miR-21-5p   | PAFAH1B1  | 5048   | ENSG00000007168 | validated |
| tarbase | hsa-miR-301a-3p | PAFAH1B1  | 5048   | ENSG00000007168 | validated |
| tarbase | hsa-miR-326     | PAFAH1B1  | 5048   | ENSG00000007168 | validated |
| tarbase | hsa-miR-181a-5p | PAFAH1B1  | 5048   | ENSG00000007168 | validated |
| tarbase | hsa-miR-15b-5p  | KIAA0100  | 9703   | ENSG00000007202 | validated |
| tarbase | hsa-miR-192-5p  | KIAA0100  | 9703   | ENSG00000007202 | validated |
| tarbase | hsa-miR-212-3p  | ST7L      | 54879  | ENSG00000007341 | validated |
| tarbase | hsa-miR-15b-5p  | CRAMP1    | 57585  | ENSG00000007545 | validated |
| tarbase | hsa-miR-296-5p  | CRAMP1    | 57585  | ENSG00000007545 | validated |
| tarbase | hsa-miR-106b-5p | TEAD3     | 7005   | ENSG00000007866 | validated |
| tarbase | hsa-miR-505-3p  | DNAJC11   | 55735  | ENSG00000007923 | validated |
| tarbase | hsa-miR-15b-5p  | MYLIP     | 29116  | ENSG00000007944 | validated |
| tarbase | hsa-miR-192-5p  | MYLIP     | 29116  | ENSG00000007944 | validated |
| tarbase | hsa-miR-301a-3p | E2F2      | 1870   | ENSG00000007968 | validated |
| tarbase | hsa-miR-326     | E2F2      | 1870   | ENSG00000007968 | validated |
| tarbase | hsa-miR-18a-5p  | PSMB1     | 5689   | ENSG00000008018 | validated |
| tarbase | hsa-miR-181a-5p | JARID2    | 3720   | ENSG00000008083 | validated |
| tarbase | hsa-miR-582-5p  | JARID2    | 3720   | ENSG00000008083 | validated |
| tarbase | hsa-miR-21-5p   | CDK11A    | 728642 | ENSG00000008128 | validated |
| tarbase | hsa-miR-296-5p  | CYTH3     | 9265   | ENSG00000008256 | validated |
| tarbase | hsa-miR-21-5p   | ADAM22    | 53616  | ENSG00000008277 | validated |
| tarbase | hsa-miR-181a-5p | SYPL1     | 6856   | ENSG00000008282 | validated |
| tarbase | hsa-miR-21-5p   | SYPL1     | 6856   | ENSG00000008282 | validated |
| tarbase | hsa-miR-301a-3p | CYB561    | 1534   | ENSG00000008283 | validated |
| tarbase | hsa-miR-106b-5p | SPAG9     | 9043   | ENSG00000008294 | validated |
| tarbase | hsa-miR-222-3p  | SPAG9     | 9043   | ENSG00000008294 | validated |
| tarbase | hsa-miR-15b-5p  | SPAG9     | 9043   | ENSG00000008294 | validated |
| tarbase | hsa-miR-181a-5p | SPAG9     | 9043   | ENSG00000008294 | validated |
| tarbase | hsa-miR-212-3p  | AASS      | 10157  | ENSG00000008311 | validated |
| tarbase | hsa-miR-15b-5p  | AASS      | 10157  | ENSG00000008311 | validated |
| tarbase | hsa-miR-181a-5p | SS18L2    | 51188  | ENSG00000008324 | validated |
| tarbase | hsa-miR-301a-3p | MGST1     | 4257   | ENSG00000008394 | validated |
| tarbase | hsa-miR-212-3p  | MMP25     | 64386  | ENSG00000008516 | validated |
| tarbase | hsa-miR-212-3p  | IL32      | 9235   | ENSG00000008517 | validated |
| tarbase | hsa-miR-106b-5p | PKD1      | 5310   | ENSG00000008710 | validated |
| tarbase | hsa-miR-18a-5p  | PKD1      | 5310   | ENSG00000008710 | validated |
| tarbase | hsa-miR-326     | PKD1      | 5310   | ENSG00000008710 | validated |
| tarbase | hsa-miR-582-3p  | PKD1      | 5310   | ENSG00000008710 | validated |

|         |                 |          |       |                 |           |
|---------|-----------------|----------|-------|-----------------|-----------|
| tarbase | hsa-miR-18a-5p  | MAPK8IP2 | 23542 | ENSG00000008735 | validated |
| tarbase | hsa-miR-192-5p  | MAPK8IP2 | 23542 | ENSG00000008735 | validated |
| tarbase | hsa-miR-505-3p  | SEC62    | 7095  | ENSG00000008952 | validated |
| tarbase | hsa-miR-212-3p  | RPS20    | 6224  | ENSG00000008988 | validated |
| tarbase | hsa-miR-582-3p  | RPS20    | 6224  | ENSG00000008988 | validated |
| tarbase | hsa-miR-18a-5p  | CSDE1    | 7812  | ENSG00000009307 | validated |
| tarbase | hsa-miR-212-3p  | CSDE1    | 7812  | ENSG00000009307 | validated |
| tarbase | hsa-miR-21-5p   | CSDE1    | 7812  | ENSG00000009307 | validated |
| tarbase | hsa-miR-296-5p  | CSDE1    | 7812  | ENSG00000009307 | validated |
| tarbase | hsa-miR-301a-3p | CSDE1    | 7812  | ENSG00000009307 | validated |
| tarbase | hsa-miR-106b-5p | UBE3C    | 9690  | ENSG00000009335 | validated |
| tarbase | hsa-miR-181a-5p | UBE3C    | 9690  | ENSG00000009335 | validated |
| tarbase | hsa-miR-18a-5p  | UBE3C    | 9690  | ENSG00000009335 | validated |
| tarbase | hsa-miR-222-3p  | UBE3C    | 9690  | ENSG00000009335 | validated |
| tarbase | hsa-miR-301a-3p | UBE3C    | 9690  | ENSG00000009335 | validated |
| tarbase | hsa-miR-582-3p  | UBE3C    | 9690  | ENSG00000009335 | validated |
| tarbase | hsa-miR-106b-5p | REV3L    | 5980  | ENSG00000009413 | validated |
| tarbase | hsa-miR-15b-5p  | REV3L    | 5980  | ENSG00000009413 | validated |
| tarbase | hsa-miR-18a-5p  | REV3L    | 5980  | ENSG00000009413 | validated |
| tarbase | hsa-miR-212-3p  | REV3L    | 5980  | ENSG00000009413 | validated |
| tarbase | hsa-miR-222-3p  | REV3L    | 5980  | ENSG00000009413 | validated |
| tarbase | hsa-miR-106b-5p | VTA1     | 51534 | ENSG00000009844 | validated |
| tarbase | hsa-miR-15b-5p  | VTA1     | 51534 | ENSG00000009844 | validated |
| tarbase | hsa-miR-181a-5p | VTA1     | 51534 | ENSG00000009844 | validated |
| tarbase | hsa-miR-296-5p  | MLXIPL   | 51085 | ENSG00000009950 | validated |
| tarbase | hsa-miR-18a-5p  | BAZ1B    | 9031  | ENSG00000009954 | validated |
| tarbase | hsa-miR-296-5p  | BAZ1B    | 9031  | ENSG00000009954 | validated |
| tarbase | hsa-miR-144-3p  | RANBP9   | 10048 | ENSG00000010017 | validated |
| tarbase | hsa-miR-15b-5p  | RANBP9   | 10048 | ENSG00000010017 | validated |
| tarbase | hsa-miR-582-5p  | RANBP9   | 10048 | ENSG00000010017 | validated |
| tarbase | hsa-miR-15b-5p  | SPRNTN   | 83932 | ENSG00000010072 | validated |
| tarbase | hsa-miR-106b-5p | ZNF207   | 7756  | ENSG00000010244 | validated |
| tarbase | hsa-miR-15b-5p  | ZNF207   | 7756  | ENSG00000010244 | validated |
| tarbase | hsa-miR-212-3p  | ZNF207   | 7756  | ENSG00000010244 | validated |
| tarbase | hsa-miR-582-3p  | ZNF207   | 7756  | ENSG00000010244 | validated |
| tarbase | hsa-miR-181a-5p | ZNF207   | 7756  | ENSG00000010244 | validated |
| tarbase | hsa-miR-192-5p  | STARD3NL | 83930 | ENSG00000010270 | validated |
| tarbase | hsa-miR-15b-5p  | NCAPD2   | 9918  | ENSG00000010292 | validated |
| tarbase | hsa-miR-582-5p  | NISCH    | 11188 | ENSG00000010322 | validated |
| tarbase | hsa-miR-18a-5p  | IDS      | 3423  | ENSG00000010404 | validated |
| tarbase | hsa-miR-582-3p  | IDS      | 3423  | ENSG00000010404 | validated |
| tarbase | hsa-miR-181a-5p | ZNF200   | 7752  | ENSG00000010539 | validated |
| tarbase | hsa-miR-326     | ZNF200   | 7752  | ENSG00000010539 | validated |
| tarbase | hsa-miR-222-3p  | CD4      | 920   | ENSG00000010610 | validated |
| tarbase | hsa-miR-21-5p   | HFE      | 3077  | ENSG00000010704 | validated |
| tarbase | hsa-miR-21-5p   | FYN      | 2534  | ENSG00000010810 | validated |
| tarbase | hsa-miR-15b-5p  | HIVEP2   | 3097  | ENSG00000010818 | validated |
| tarbase | hsa-miR-106b-5p | ELOA     | 6924  | ENSG00000011007 | validated |
| tarbase | hsa-miR-181a-5p | ELOA     | 6924  | ENSG00000011007 | validated |
| tarbase | hsa-miR-301a-3p | ELOA     | 6924  | ENSG00000011007 | validated |
| tarbase | hsa-miR-582-3p  | ELOA     | 6924  | ENSG00000011007 | validated |
| tarbase | hsa-miR-15b-5p  | LYPLA2   | 11313 | ENSG00000011009 | validated |
| tarbase | hsa-miR-181a-5p | BTBD7    | 55727 | ENSG00000011114 | validated |
| tarbase | hsa-miR-212-3p  | BTBD7    | 55727 | ENSG00000011114 | validated |
| tarbase | hsa-miR-222-3p  | BTBD7    | 55727 | ENSG00000011114 | validated |
| tarbase | hsa-miR-301a-3p | BTBD7    | 55727 | ENSG00000011114 | validated |
| tarbase | hsa-miR-582-3p  | BTBD7    | 55727 | ENSG00000011114 | validated |
| tarbase | hsa-miR-326     | MKS1     | 54903 | ENSG00000011143 | validated |
| tarbase | hsa-miR-106b-5p | ABHD5    | 51099 | ENSG00000011198 | validated |
| tarbase | hsa-miR-106b-5p | TTC19    | 54902 | ENSG00000011295 | validated |
| tarbase | hsa-miR-106b-5p | PTBP1    | 5725  | ENSG00000011304 | validated |
| tarbase | hsa-miR-192-5p  | PTBP1    | 5725  | ENSG00000011304 | validated |
| tarbase | hsa-miR-21-5p   | PTBP1    | 5725  | ENSG00000011304 | validated |
| tarbase | hsa-miR-505-3p  | PTBP1    | 5725  | ENSG00000011304 | validated |
| tarbase | hsa-miR-582-3p  | PTBP1    | 5725  | ENSG00000011304 | validated |
| tarbase | hsa-miR-582-3p  | PIK3C2A  | 5286  | ENSG00000011405 | validated |
| tarbase | hsa-miR-582-5p  | PIK3C2A  | 5286  | ENSG00000011405 | validated |
| tarbase | hsa-miR-181a-5p | PIK3C2A  | 5286  | ENSG00000011405 | validated |
| tarbase | hsa-miR-144-3p  | ANLN     | 54443 | ENSG00000011426 | validated |
| tarbase | hsa-miR-15b-5p  | ANLN     | 54443 | ENSG00000011426 | validated |
| tarbase | hsa-miR-21-5p   | ANLN     | 54443 | ENSG00000011426 | validated |

|         |                 |          |       |                 |           |
|---------|-----------------|----------|-------|-----------------|-----------|
| tarbase | hsa-miR-582-5p  | ANLN     | 54443 | ENSG00000011426 | validated |
| tarbase | hsa-miR-212-3p  | ANLN     | 54443 | ENSG00000011426 | validated |
| tarbase | hsa-miR-181a-5p | WIZ      | 58525 | ENSG00000011451 | validated |
| tarbase | hsa-miR-181a-5p |          |       | ENSG00000011454 | validated |
| tarbase | hsa-miR-21-5p   |          |       | ENSG00000011454 | validated |
| tarbase | hsa-miR-301a-3p |          |       | ENSG00000011454 | validated |
| tarbase | hsa-miR-222-3p  | DCN      | 1634  | ENSG00000011465 | validated |
| tarbase | hsa-miR-301a-3p | CEP68    | 23177 | ENSG00000011523 | validated |
| tarbase | hsa-miR-181a-5p | MAP4K3   | 8491  | ENSG00000011566 | validated |
| tarbase | hsa-miR-582-5p  | MAP4K3   | 8491  | ENSG00000011566 | validated |
| tarbase | hsa-miR-301a-3p | MAP4K3   | 8491  | ENSG00000011566 | validated |
| tarbase | hsa-miR-15b-5p  | TMEM159  | 57146 | ENSG00000011638 | validated |
| tarbase | hsa-miR-212-3p  | TMEM159  | 57146 | ENSG00000011638 | validated |
| tarbase | hsa-miR-15b-5p  | MBTPS2   | 51360 | ENSG00000012174 | validated |
| tarbase | hsa-miR-21-5p   | MBTPS2   | 51360 | ENSG00000012174 | validated |
| tarbase | hsa-miR-15b-5p  | ELOVL5   | 60481 | ENSG00000012660 | validated |
| tarbase | hsa-miR-18a-5p  | ELOVL5   | 60481 | ENSG00000012660 | validated |
| tarbase | hsa-miR-301a-3p | UBR7     | 55148 | ENSG00000012963 | validated |
| tarbase | hsa-miR-582-3p  | UBR7     | 55148 | ENSG00000012963 | validated |
| tarbase | hsa-miR-212-3p  | MAP4K5   | 11183 | ENSG00000012983 | validated |
| tarbase | hsa-miR-106b-5p | EHD3     | 30845 | ENSG00000013016 | validated |
| tarbase | hsa-miR-222-3p  | CLDN11   | 5010  | ENSG00000013297 | validated |
| tarbase | hsa-miR-15b-5p  | SLC25A39 | 51629 | ENSG00000013306 | validated |
| tarbase | hsa-miR-212-3p  | MVP      | 9961  | ENSG00000013364 | validated |
| tarbase | hsa-miR-181a-5p | NUB1     | 51667 | ENSG00000013374 | validated |
| tarbase | hsa-miR-582-3p  | NUB1     | 51667 | ENSG00000013374 | validated |
| tarbase | hsa-miR-21-5p   | PGM3     | 5238  | ENSG00000013375 | validated |
| tarbase | hsa-miR-212-3p  | DNASE1L1 | 1774  | ENSG00000013563 | validated |
| tarbase | hsa-miR-18a-5p  | GPRC5A   | 9052  | ENSG00000013588 | validated |
| tarbase | hsa-miR-21-5p   | GPRC5A   | 9052  | ENSG00000013588 | validated |
| tarbase | hsa-miR-582-5p  | GPRC5A   | 9052  | ENSG00000013588 | validated |
| tarbase | hsa-miR-18a-5p  | MAMLD1   | 10046 | ENSG00000013619 | validated |
| tarbase | hsa-miR-212-3p  | MAMLD1   | 10046 | ENSG00000013619 | validated |
| tarbase | hsa-miR-181a-5p | POLA2    | 23649 | ENSG00000014138 | validated |
| tarbase | hsa-miR-222-3p  | COX15    | 1355  | ENSG00000014919 | validated |
| tarbase | hsa-miR-15b-5p  | ZMYND11  | 10771 | ENSG00000015171 | validated |
| tarbase | hsa-miR-181a-5p | ZMYND11  | 10771 | ENSG00000015171 | validated |
| tarbase | hsa-miR-21-5p   | ZMYND11  | 10771 | ENSG00000015171 | validated |
| tarbase | hsa-miR-505-3p  | ZMYND11  | 10771 | ENSG00000015171 | validated |
| tarbase | hsa-miR-21-5p   | BID      | 637   | ENSG00000015475 | validated |
| tarbase | hsa-miR-106b-5p | MATR3    | 9782  | ENSG00000015479 | validated |
| tarbase | hsa-miR-15b-5p  | MATR3    | 9782  | ENSG00000015479 | validated |
| tarbase | hsa-miR-296-5p  | MATR3    | 9782  | ENSG00000015479 | validated |
| tarbase | hsa-miR-144-3p  | NPC1L1   | 29881 | ENSG00000015520 | validated |
| tarbase | hsa-miR-301a-3p | XYLT2    | 64132 | ENSG00000015532 | validated |
| tarbase | hsa-miR-326     | XYLT2    | 64132 | ENSG00000015532 | validated |
| tarbase | hsa-miR-15b-5p  | CLCA1    | 1179  | ENSG00000016490 | validated |
| tarbase | hsa-miR-144-3p  | ATP2C1   | 27032 | ENSG00000017260 | validated |
| tarbase | hsa-miR-301a-3p | ATP2C1   | 27032 | ENSG00000017260 | validated |
| tarbase | hsa-miR-15b-5p  | ATP2C1   | 27032 | ENSG00000017260 | validated |
| tarbase | hsa-miR-181a-5p | RALBP1   | 10928 | ENSG00000017797 | validated |
| tarbase | hsa-miR-181a-5p | CNTN1    | 1272  | ENSG00000018236 | validated |
| tarbase | hsa-miR-582-3p  | WWTR1    | 25937 | ENSG00000018408 | validated |
| tarbase | hsa-miR-582-5p  | WWTR1    | 25937 | ENSG00000018408 | validated |
| tarbase | hsa-miR-106b-5p | CXorf56  | 63932 | ENSG00000018610 | validated |
| tarbase | hsa-miR-181a-5p | TTC27    | 55622 | ENSG00000018699 | validated |
| tarbase | hsa-miR-582-3p  | TTC27    | 55622 | ENSG00000018699 | validated |
| tarbase | hsa-miR-18a-5p  | PRDM11   | 56981 | ENSG00000019485 | validated |
| tarbase | hsa-miR-21-5p   | PRDM11   | 56981 | ENSG00000019485 | validated |
| tarbase | hsa-miR-15b-5p  | HGF      | 3082  | ENSG00000019991 | validated |
| tarbase | hsa-miR-222-3p  | ZRANB1   | 54764 | ENSG00000019995 | validated |
| tarbase | hsa-miR-21-5p   | SAMD4A   | 23034 | ENSG00000020577 | validated |
| tarbase | hsa-miR-21-5p   | MRE11    | 4361  | ENSG00000020922 | validated |
| tarbase | hsa-miR-15b-5p  | SPAST    | 6683  | ENSG00000021574 | validated |
| tarbase | hsa-miR-212-3p  | SPAST    | 6683  | ENSG00000021574 | validated |
| tarbase | hsa-miR-212-3p  | NRXN3    | 9369  | ENSG00000021645 | validated |
| tarbase | hsa-miR-181a-5p | AQR      | 9716  | ENSG00000021776 | validated |
| tarbase | hsa-miR-21-5p   | CPS1     | 1373  | ENSG00000021826 | validated |
| tarbase | hsa-miR-582-5p  | CPS1     | 1373  | ENSG00000021826 | validated |
| tarbase | hsa-miR-582-5p  | FHL1     | 2273  | ENSG00000022267 | validated |
| tarbase | hsa-miR-212-3p  | FHL1     | 2273  | ENSG00000022267 | validated |

|         |                 |         |       |                 |           |
|---------|-----------------|---------|-------|-----------------|-----------|
| tarbase | hsa-miR-106b-5p | RTF2    | 51507 | ENSG00000022277 | validated |
| tarbase | hsa-miR-15b-5p  | GABRA1  | 2554  | ENSG00000022355 | validated |
| tarbase | hsa-miR-181a-5p | GABRA1  | 2554  | ENSG00000022355 | validated |
| tarbase | hsa-miR-106b-5p | RNH1    | 6050  | ENSG00000023191 | validated |
| tarbase | hsa-miR-21-5p   | NDUFS1  | 4719  | ENSG00000023228 | validated |
| tarbase | hsa-miR-15b-5p  | NDUFS1  | 4719  | ENSG00000023228 | validated |
| tarbase | hsa-miR-192-5p  | RB1CC1  | 9821  | ENSG00000023287 | validated |
| tarbase | hsa-miR-212-3p  | RB1CC1  | 9821  | ENSG00000023287 | validated |
| tarbase | hsa-miR-301a-3p | ERP44   | 23071 | ENSG00000023318 | validated |
| tarbase | hsa-miR-582-5p  | ERP44   | 23071 | ENSG00000023318 | validated |
| tarbase | hsa-miR-222-3p  | BIRC3   | 330   | ENSG00000023445 | validated |
| tarbase | hsa-miR-582-5p  | BIRC3   | 330   | ENSG00000023445 | validated |
| tarbase | hsa-miR-21-5p   | BIRC3   | 330   | ENSG00000023445 | validated |
| tarbase | hsa-miR-296-5p  | AKAP11  | 11215 | ENSG00000023516 | validated |
| tarbase | hsa-miR-582-5p  | AKAP11  | 11215 | ENSG00000023516 | validated |
| tarbase | hsa-miR-181a-5p | AKAP11  | 11215 | ENSG00000023516 | validated |
| tarbase | hsa-miR-212-3p  | DERA    | 51071 | ENSG00000023697 | validated |
| tarbase | hsa-miR-582-5p  | GCLM    | 2730  | ENSG00000023909 | validated |
| tarbase | hsa-miR-106b-5p | DEPDC1  | 55635 | ENSG00000024526 | validated |
| tarbase | hsa-miR-212-3p  | DEPDC1  | 55635 | ENSG00000024526 | validated |
| tarbase | hsa-miR-15b-5p  | RRAGD   | 58528 | ENSG00000025039 | validated |
| tarbase | hsa-miR-181a-5p | RRAGD   | 58528 | ENSG00000025039 | validated |
| tarbase | hsa-miR-21-5p   | HSF2    | 3298  | ENSG00000025156 | validated |
| tarbase | hsa-miR-212-3p  | HSF2    | 3298  | ENSG00000025156 | validated |
| tarbase | hsa-miR-212-3p  | PHF20   | 51230 | ENSG00000025293 | validated |
| tarbase | hsa-miR-301a-3p | PHF20   | 51230 | ENSG00000025293 | validated |
| tarbase | hsa-miR-212-3p  | HSD17B6 | 8630  | ENSG00000025423 | validated |
| tarbase | hsa-miR-212-3p  | NR1H3   | 10062 | ENSG00000025434 | validated |
| tarbase | hsa-miR-106b-5p | SEC63   | 11231 | ENSG00000025796 | validated |
| tarbase | hsa-miR-181a-5p | KPNA6   | 23633 | ENSG00000025800 | validated |
| tarbase | hsa-miR-18a-5p  | KPNA6   | 23633 | ENSG00000025800 | validated |
| tarbase | hsa-miR-326     | KPNA6   | 23633 | ENSG00000025800 | validated |
| tarbase | hsa-miR-301a-3p | KPNA6   | 23633 | ENSG00000025800 | validated |
| tarbase | hsa-miR-15b-5p  | VIM     | 7431  | ENSG00000026025 | validated |
| tarbase | hsa-miR-21-5p   | VIM     | 7431  | ENSG00000026025 | validated |
| tarbase | hsa-miR-296-5p  | RNASET2 | 8635  | ENSG00000026297 | validated |
| tarbase | hsa-miR-21-5p   | CD44    | 960   | ENSG00000026508 | validated |
| tarbase | hsa-miR-212-3p  | CD44    | 960   | ENSG00000026508 | validated |
| tarbase | hsa-miR-192-5p  | SLAMF7  | 57823 | ENSG00000026751 | validated |
| tarbase | hsa-miR-212-3p  | MIPEP   | 4285  | ENSG00000027001 | validated |
| tarbase | hsa-miR-18a-5p  | INSRR   | 3645  | ENSG00000027644 | validated |
| tarbase | hsa-miR-212-3p  | SH2D2A  | 9047  | ENSG00000027869 | validated |
| tarbase | hsa-miR-106b-5p | VEZT    | 55591 | ENSG00000028203 | validated |
| tarbase | hsa-miR-15b-5p  | VEZT    | 55591 | ENSG00000028203 | validated |
| tarbase | hsa-miR-18a-5p  | VEZT    | 55591 | ENSG00000028203 | validated |
| tarbase | hsa-miR-582-3p  | VEZT    | 55591 | ENSG00000028203 | validated |
| tarbase | hsa-miR-21-5p   | VEZT    | 55591 | ENSG00000028203 | validated |
| tarbase | hsa-miR-326     | BRD9    | 65980 | ENSG00000028310 | validated |
| tarbase | hsa-miR-18a-5p  | SNX1    | 6642  | ENSG00000028528 | validated |
| tarbase | hsa-miR-181a-5p | TBPL1   | 9519  | ENSG00000028839 | validated |
| tarbase | hsa-miR-582-5p  | TBPL1   | 9519  | ENSG00000028839 | validated |
| tarbase | hsa-miR-106b-5p | ARNTL2  | 56938 | ENSG00000029153 | validated |
| tarbase | hsa-miR-181a-5p | BCLAF1  | 9774  | ENSG00000029363 | validated |
| tarbase | hsa-miR-106b-5p | SLC39A9 | 55334 | ENSG00000029364 | validated |
| tarbase | hsa-miR-222-3p  | SLC39A9 | 55334 | ENSG00000029364 | validated |
| tarbase | hsa-miR-582-3p  | SLC39A9 | 55334 | ENSG00000029364 | validated |
| tarbase | hsa-miR-181a-5p | TFB1M   | 51106 | ENSG00000029639 | validated |
| tarbase | hsa-miR-296-5p  | TFB1M   | 51106 | ENSG00000029639 | validated |
| tarbase | hsa-miR-18a-5p  | RABEP1  | 9135  | ENSG00000029725 | validated |
| tarbase | hsa-miR-296-5p  | RABEP1  | 9135  | ENSG00000029725 | validated |
| tarbase | hsa-miR-181a-5p | HMGB3   | 3149  | ENSG00000029993 | validated |
| tarbase | hsa-miR-18a-5p  | NUP160  | 23279 | ENSG00000030066 | validated |
| tarbase | hsa-miR-301a-3p | NUP160  | 23279 | ENSG00000030066 | validated |
| tarbase | hsa-miR-212-3p  | NUP160  | 23279 | ENSG00000030066 | validated |
| tarbase | hsa-miR-296-5p  | BAK1    | 578   | ENSG00000030110 | validated |
| tarbase | hsa-miR-301a-3p | IKZF2   | 22807 | ENSG00000030419 | validated |
| tarbase | hsa-miR-505-3p  | IKZF2   | 22807 | ENSG00000030419 | validated |
| tarbase | hsa-miR-212-3p  | FAM13B  | 51306 | ENSG00000031003 | validated |
| tarbase | hsa-miR-212-3p  | CENPQ   | 55166 | ENSG00000031691 | validated |
| tarbase | hsa-miR-296-5p  | RANBP3  | 8498  | ENSG00000031823 | validated |
| tarbase | hsa-miR-212-3p  | ARID4A  | 5926  | ENSG00000032219 | validated |



|         |                 |            |        |                 |           |
|---------|-----------------|------------|--------|-----------------|-----------|
| tarbase | hsa-miR-212-3p  | IFT88      | 8100   | ENSG00000032742 | validated |
| tarbase | hsa-miR-15b-5p  | ABCF2      | 10061  | ENSG00000033050 | validated |
| tarbase | hsa-miR-301a-3p | ABCF2      | 10061  | ENSG00000033050 | validated |
| tarbase | hsa-miR-15b-5p  | CHPF2      | 54480  | ENSG00000033100 | validated |
| tarbase | hsa-miR-181a-5p | CHPF2      | 54480  | ENSG00000033100 | validated |
| tarbase | hsa-miR-15b-5p  | LRRC7      | 57554  | ENSG00000033122 | validated |
| tarbase | hsa-miR-296-5p  | FUT8       | 2530   | ENSG00000033170 | validated |
| tarbase | hsa-miR-15b-5p  | UBA6       | 55236  | ENSG00000033178 | validated |
| tarbase | hsa-miR-21-5p   | UBA6       | 55236  | ENSG00000033178 | validated |
| tarbase | hsa-miR-192-5p  | ATP6V0A1   | 535    | ENSG00000033627 | validated |
| tarbase | hsa-miR-15b-5p  | PIAS1      | 8554   | ENSG00000033800 | validated |
| tarbase | hsa-miR-181a-5p | PIAS1      | 8554   | ENSG00000033800 | validated |
| tarbase | hsa-miR-181a-5p | SLC4A7     | 9497   | ENSG00000033867 | validated |
| tarbase | hsa-miR-222-3p  | SLC4A7     | 9497   | ENSG00000033867 | validated |
| tarbase | hsa-miR-18a-5p  | MAP2K3     | 5606   | ENSG00000034152 | validated |
| tarbase | hsa-miR-212-3p  | RNF19A     | 25897  | ENSG00000034677 | validated |
| tarbase | hsa-miR-222-3p  | RNF19A     | 25897  | ENSG00000034677 | validated |
| tarbase | hsa-miR-582-3p  | RNF19A     | 25897  | ENSG00000034677 | validated |
| tarbase | hsa-miR-106b-5p | FAM136A    | 84908  | ENSG00000035141 | validated |
| tarbase | hsa-miR-106b-5p | VCL        | 7414   | ENSG00000035403 | validated |
| tarbase | hsa-miR-181a-5p | VCL        | 7414   | ENSG00000035403 | validated |
| tarbase | hsa-miR-21-5p   | VCL        | 7414   | ENSG00000035403 | validated |
| tarbase | hsa-miR-326     | VCL        | 7414   | ENSG00000035403 | validated |
| tarbase | hsa-miR-15b-5p  | DEPDC1B    | 55789  | ENSG00000035499 | validated |
| tarbase | hsa-miR-582-3p  | DEPDC1B    | 55789  | ENSG00000035499 | validated |
| tarbase | hsa-miR-212-3p  | DEPDC1B    | 55789  | ENSG00000035499 | validated |
| tarbase | hsa-miR-15b-5p  | ADSS2      | 159    | ENSG00000035687 | validated |
| tarbase | hsa-miR-181a-5p | ADSS2      | 159    | ENSG00000035687 | validated |
| tarbase | hsa-miR-181a-5p | TIMP2      | 7077   | ENSG00000035862 | validated |
| tarbase | hsa-miR-18a-5p  | TIMP2      | 7077   | ENSG00000035862 | validated |
| tarbase | hsa-miR-222-3p  | TIMP2      | 7077   | ENSG00000035862 | validated |
| tarbase | hsa-miR-144-3p  | RFC1       | 5981   | ENSG00000035928 | validated |
| tarbase | hsa-miR-21-5p   | RFC1       | 5981   | ENSG00000035928 | validated |
| tarbase | hsa-miR-582-5p  | RFC1       | 5981   | ENSG00000035928 | validated |
| tarbase | hsa-miR-582-5p  | TBC1D23    | 55773  | ENSG00000036054 | validated |
| tarbase | hsa-miR-106b-5p | CUL3       | 8452   | ENSG00000036257 | validated |
| tarbase | hsa-miR-21-5p   | CUL3       | 8452   | ENSG00000036257 | validated |
| tarbase | hsa-miR-222-3p  | CUL3       | 8452   | ENSG00000036257 | validated |
| tarbase | hsa-miR-181a-5p | AC118549.1 | 26009  | ENSG00000036549 | validated |
| tarbase | hsa-miR-212-3p  | TUBG2      | 27175  | ENSG00000037042 | validated |
| tarbase | hsa-miR-296-5p  | FLT4       | 2324   | ENSG00000037280 | validated |
| tarbase | hsa-miR-106b-5p | NSUN2      | 54888  | ENSG00000037474 | validated |
| tarbase | hsa-miR-15b-5p  | NSUN2      | 54888  | ENSG00000037474 | validated |
| tarbase | hsa-miR-106b-5p | MFAP3      | 4238   | ENSG00000037749 | validated |
| tarbase | hsa-miR-181a-5p | MFAP3      | 4238   | ENSG00000037749 | validated |
| tarbase | hsa-miR-222-3p  | MFAP3      | 4238   | ENSG00000037749 | validated |
| tarbase | hsa-miR-301a-3p | MFAP3      | 4238   | ENSG00000037749 | validated |
| tarbase | hsa-miR-326     | MRI1       | 84245  | ENSG00000037757 | validated |
| tarbase | hsa-miR-21-5p   | PI4K2B     | 55300  | ENSG00000038210 | validated |
| tarbase | hsa-miR-106b-5p | BOD1L1     | 259282 | ENSG00000038219 | validated |
| tarbase | hsa-miR-144-3p  | BOD1L1     | 259282 | ENSG00000038219 | validated |
| tarbase | hsa-miR-18a-5p  | BOD1L1     | 259282 | ENSG00000038219 | validated |
| tarbase | hsa-miR-21-5p   | BOD1L1     | 259282 | ENSG00000038219 | validated |
| tarbase | hsa-miR-106b-5p | MAT2B      | 27430  | ENSG00000038274 | validated |
| tarbase | hsa-miR-21-5p   | EDC4       | 23644  | ENSG00000038358 | validated |
| tarbase | hsa-miR-296-5p  | TRIO       | 7204   | ENSG00000038382 | validated |
| tarbase | hsa-miR-582-3p  | TRIO       | 7204   | ENSG00000038382 | validated |
| tarbase | hsa-miR-582-5p  | TRIO       | 7204   | ENSG00000038382 | validated |
| tarbase | hsa-miR-106b-5p | VCAN       | 1462   | ENSG00000038427 | validated |
| tarbase | hsa-miR-144-3p  | VCAN       | 1462   | ENSG00000038427 | validated |
| tarbase | hsa-miR-18a-5p  | VCAN       | 1462   | ENSG00000038427 | validated |
| tarbase | hsa-miR-192-5p  | VCAN       | 1462   | ENSG00000038427 | validated |
| tarbase | hsa-miR-222-3p  | VCAN       | 1462   | ENSG00000038427 | validated |
| tarbase | hsa-miR-181a-5p | CLEC16A    | 23274  | ENSG00000038532 | validated |
| tarbase | hsa-miR-15b-5p  | CDH1       | 999    | ENSG00000039068 | validated |
| tarbase | hsa-miR-106b-5p | RAI14      | 26064  | ENSG00000039560 | validated |
| tarbase | hsa-miR-15b-5p  | RAI14      | 26064  | ENSG00000039560 | validated |
| tarbase | hsa-miR-181a-5p | RAI14      | 26064  | ENSG00000039560 | validated |
| tarbase | hsa-miR-222-3p  | RAI14      | 26064  | ENSG00000039560 | validated |
| tarbase | hsa-miR-301a-3p | RAI14      | 26064  | ENSG00000039560 | validated |
| tarbase | hsa-miR-301a-3p | PHLPP2     | 23035  | ENSG00000040199 | validated |

|         |                 |            |        |                 |           |
|---------|-----------------|------------|--------|-----------------|-----------|
| tarbase | hsa-miR-18a-5p  | PHLPP2     | 23035  | ENSG00000040199 | validated |
| tarbase | hsa-miR-181a-5p | SPDL1      | 54908  | ENSG00000040275 | validated |
| tarbase | hsa-miR-15b-5p  | PHF23      | 79142  | ENSG00000040633 | validated |
| tarbase | hsa-miR-296-5p  | PHF23      | 79142  | ENSG00000040633 | validated |
| tarbase | hsa-miR-15b-5p  | INPP4A     | 3631   | ENSG00000040933 | validated |
| tarbase | hsa-miR-181a-5p | INPP4A     | 3631   | ENSG00000040933 | validated |
| tarbase | hsa-miR-192-5p  | RAB27B     | 5874   | ENSG00000041353 | validated |
| tarbase | hsa-miR-21-5p   | RAB27B     | 5874   | ENSG00000041353 | validated |
| tarbase | hsa-miR-181a-5p | PSMA4      | 5685   | ENSG00000041357 | validated |
| tarbase | hsa-miR-15b-5p  | LSG1       | 55341  | ENSG00000041802 | validated |
| tarbase | hsa-miR-181a-5p | LSG1       | 55341  | ENSG00000041802 | validated |
| tarbase | hsa-miR-21-5p   | LSG1       | 55341  | ENSG00000041802 | validated |
| tarbase | hsa-miR-296-5p  | TNC        | 3371   | ENSG00000041982 | validated |
| tarbase | hsa-miR-505-3p  | TNC        | 3371   | ENSG00000041982 | validated |
| tarbase | hsa-miR-212-3p  | TNC        | 3371   | ENSG00000041982 | validated |
| tarbase | hsa-miR-212-3p  | C2orf83    | 56918  | ENSG00000042304 | validated |
| tarbase | hsa-miR-106b-5p | AL049834.1 | 55812  | ENSG00000042317 | validated |
| tarbase | hsa-miR-212-3p  | AL049834.1 | 55812  | ENSG00000042317 | validated |
| tarbase | hsa-miR-301a-3p | MED17      | 9440   | ENSG00000042429 | validated |
| tarbase | hsa-miR-505-3p  | MED17      | 9440   | ENSG00000042429 | validated |
| tarbase | hsa-miR-15b-5p  | MED17      | 9440   | ENSG00000042429 | validated |
| tarbase | hsa-miR-222-3p  | DCUN1D1    | 54165  | ENSG00000043093 | validated |
| tarbase | hsa-miR-181a-5p | ZIC2       | 7546   | ENSG00000043355 | validated |
| tarbase | hsa-miR-212-3p  | ZIC2       | 7546   | ENSG00000043355 | validated |
| tarbase | hsa-miR-326     | ZIC2       | 7546   | ENSG00000043355 | validated |
| tarbase | hsa-miR-582-5p  | ADRB1      | 153    | ENSG00000043591 | validated |
| tarbase | hsa-miR-301a-3p | CUL7       | 9820   | ENSG00000044090 | validated |
| tarbase | hsa-miR-18a-5p  | CTNNA1     | 1495   | ENSG00000044115 | validated |
| tarbase | hsa-miR-15b-5p  | HSPA5      | 3309   | ENSG00000044574 | validated |
| tarbase | hsa-miR-181a-5p | HSPA5      | 3309   | ENSG00000044574 | validated |
| tarbase | hsa-miR-21-5p   | HSPA5      | 3309   | ENSG00000044574 | validated |
| tarbase | hsa-miR-222-3p  | HSPA5      | 3309   | ENSG00000044574 | validated |
| tarbase | hsa-miR-181a-5p | DSG2       | 1829   | ENSG00000046604 | validated |
| tarbase | hsa-miR-296-5p  | DSG2       | 1829   | ENSG00000046604 | validated |
| tarbase | hsa-miR-15b-5p  | GPM6B      | 2824   | ENSG00000046653 | validated |
| tarbase | hsa-miR-181a-5p | PREX2      | 80243  | ENSG00000046889 | validated |
| tarbase | hsa-miR-181a-5p | WDR37      | 22884  | ENSG00000047056 | validated |
| tarbase | hsa-miR-21-5p   | YTHDC2     | 64848  | ENSG00000047188 | validated |
| tarbase | hsa-miR-181a-5p | YTHDC2     | 64848  | ENSG00000047188 | validated |
| tarbase | hsa-miR-15b-5p  | CTPS2      | 56474  | ENSG00000047230 | validated |
| tarbase | hsa-miR-212-3p  | ATP6V1H    | 51606  | ENSG00000047249 | validated |
| tarbase | hsa-miR-106b-5p | POLR2B     | 5431   | ENSG00000047315 | validated |
| tarbase | hsa-miR-15b-5p  | POLR2B     | 5431   | ENSG00000047315 | validated |
| tarbase | hsa-miR-181a-5p | POLR2B     | 5431   | ENSG00000047315 | validated |
| tarbase | hsa-miR-212-3p  | POLR2B     | 5431   | ENSG00000047315 | validated |
| tarbase | hsa-miR-301a-3p | POLR2B     | 5431   | ENSG00000047315 | validated |
| tarbase | hsa-miR-181a-5p | FAM214A    | 56204  | ENSG00000047346 | validated |
| tarbase | hsa-miR-301a-3p | FAM214A    | 56204  | ENSG00000047346 | validated |
| tarbase | hsa-miR-18a-5p  | ARAP2      | 116984 | ENSG00000047365 | validated |
| tarbase | hsa-miR-301a-3p | ARAP2      | 116984 | ENSG00000047365 | validated |
| tarbase | hsa-miR-15b-5p  | ARAP2      | 116984 | ENSG00000047365 | validated |
| tarbase | hsa-miR-181a-5p | ARAP2      | 116984 | ENSG00000047365 | validated |
| tarbase | hsa-miR-106b-5p | TPR        | 7175   | ENSG00000047410 | validated |
| tarbase | hsa-miR-181a-5p | TPR        | 7175   | ENSG00000047410 | validated |
| tarbase | hsa-miR-212-3p  | TPR        | 7175   | ENSG00000047410 | validated |
| tarbase | hsa-miR-106b-5p | SCML1      | 6322   | ENSG00000047634 | validated |
| tarbase | hsa-miR-15b-5p  | SCML1      | 6322   | ENSG00000047634 | validated |
| tarbase | hsa-miR-181a-5p | SCML1      | 6322   | ENSG00000047634 | validated |
| tarbase | hsa-miR-18a-5p  | SCML1      | 6322   | ENSG00000047634 | validated |
| tarbase | hsa-miR-505-3p  | SCML1      | 6322   | ENSG00000047634 | validated |
| tarbase | hsa-miR-582-5p  | SCML1      | 6322   | ENSG00000047634 | validated |
| tarbase | hsa-miR-15b-5p  | MAP4       | 4134   | ENSG00000047849 | validated |
| tarbase | hsa-miR-582-3p  | MAP4       | 4134   | ENSG00000047849 | validated |
| tarbase | hsa-miR-582-5p  | MAP4       | 4134   | ENSG00000047849 | validated |
| tarbase | hsa-miR-301a-3p | USP28      | 57646  | ENSG00000048028 | validated |
| tarbase | hsa-miR-301a-3p | TSPAN17    | 26262  | ENSG00000048140 | validated |
| tarbase | hsa-miR-15b-5p  | RRM2B      | 50484  | ENSG00000048392 | validated |
| tarbase | hsa-miR-181a-5p | RRM2B      | 50484  | ENSG00000048392 | validated |
| tarbase | hsa-miR-181a-5p | ZNF800     | 168850 | ENSG00000048405 | validated |
| tarbase | hsa-miR-582-5p  | ZNF800     | 168850 | ENSG00000048405 | validated |
| tarbase | hsa-miR-106b-5p | TNFRSF17   | 608    | ENSG00000048462 | validated |

|         |                 |          |       |                 |           |
|---------|-----------------|----------|-------|-----------------|-----------|
| tarbase | hsa-miR-21-5p   | SNX29    | 92017 | ENSG00000048471 | validated |
| tarbase | hsa-miR-181a-5p | LMO3     | 55885 | ENSG00000048540 | validated |
| tarbase | hsa-miR-106b-5p | RSF1     | 51773 | ENSG00000048649 | validated |
| tarbase | hsa-miR-106b-5p | VPS13D   | 55187 | ENSG00000048707 | validated |
| tarbase | hsa-miR-181a-5p | VPS13D   | 55187 | ENSG00000048707 | validated |
| tarbase | hsa-miR-296-5p  | VPS13D   | 55187 | ENSG00000048707 | validated |
| tarbase | hsa-miR-301a-3p | VPS13D   | 55187 | ENSG00000048707 | validated |
| tarbase | hsa-miR-106b-5p | CELF2    | 10659 | ENSG00000048740 | validated |
| tarbase | hsa-miR-144-3p  | CELF2    | 10659 | ENSG00000048740 | validated |
| tarbase | hsa-miR-21-5p   | CELF2    | 10659 | ENSG00000048740 | validated |
| tarbase | hsa-miR-582-5p  | CELF2    | 10659 | ENSG00000048740 | validated |
| tarbase | hsa-miR-106b-5p | FAM120A  | 23196 | ENSG00000048828 | validated |
| tarbase | hsa-miR-15b-5p  | FAM120A  | 23196 | ENSG00000048828 | validated |
| tarbase | hsa-miR-301a-3p | FAM120A  | 23196 | ENSG00000048828 | validated |
| tarbase | hsa-miR-212-3p  | COL9A2   | 1298  | ENSG00000049089 | validated |
| tarbase | hsa-miR-212-3p  | ADAMTS6  | 11174 | ENSG00000049192 | validated |
| tarbase | hsa-miR-301a-3p | VAMP3    | 9341  | ENSG00000049245 | validated |
| tarbase | hsa-miR-326     | VAMP3    | 9341  | ENSG00000049245 | validated |
| tarbase | hsa-miR-582-5p  | VAMP3    | 9341  | ENSG00000049245 | validated |
| tarbase | hsa-miR-212-3p  | TNFRSF9  | 3604  | ENSG00000049249 | validated |
| tarbase | hsa-miR-106b-5p | LTBP1    | 4052  | ENSG00000049323 | validated |
| tarbase | hsa-miR-15b-5p  | LTBP1    | 4052  | ENSG00000049323 | validated |
| tarbase | hsa-miR-296-5p  | LTBP1    | 4052  | ENSG00000049323 | validated |
| tarbase | hsa-miR-301a-3p | LTBP1    | 4052  | ENSG00000049323 | validated |
| tarbase | hsa-miR-21-5p   | RCN1     | 5954  | ENSG00000049449 | validated |
| tarbase | hsa-miR-181a-5p | RCN1     | 5954  | ENSG00000049449 | validated |
| tarbase | hsa-miR-212-3p  | RCN1     | 5954  | ENSG00000049449 | validated |
| tarbase | hsa-miR-181a-5p | RFC2     | 5982  | ENSG00000049541 | validated |
| tarbase | hsa-miR-181a-5p | ARID1B   | 57492 | ENSG00000049618 | validated |
| tarbase | hsa-miR-18a-5p  | CLPTM1L  | 81037 | ENSG00000049656 | validated |
| tarbase | hsa-miR-106b-5p | NEDD4L   | 23327 | ENSG00000049759 | validated |
| tarbase | hsa-miR-192-5p  | NEDD4L   | 23327 | ENSG00000049759 | validated |
| tarbase | hsa-miR-15b-5p  | JKAMP    | 51528 | ENSG00000050130 | validated |
| tarbase | hsa-miR-181a-5p | MCUR1    | 63933 | ENSG00000050393 | validated |
| tarbase | hsa-miR-21-5p   | LIMA1    | 51474 | ENSG00000050405 | validated |
| tarbase | hsa-miR-301a-3p | LIMA1    | 51474 | ENSG00000050405 | validated |
| tarbase | hsa-miR-15b-5p  | MAPK9    | 5601  | ENSG00000050748 | validated |
| tarbase | hsa-miR-582-3p  | MAPK9    | 5601  | ENSG00000050748 | validated |
| tarbase | hsa-miR-144-3p  | HERPUD1  | 9709  | ENSG00000051108 | validated |
| tarbase | hsa-miR-181a-5p | HERPUD1  | 9709  | ENSG00000051108 | validated |
| tarbase | hsa-miR-301a-3p | HERPUD1  | 9709  | ENSG00000051108 | validated |
| tarbase | hsa-miR-181a-5p | PIK3CB   | 5291  | ENSG00000051382 | validated |
| tarbase | hsa-miR-301a-3p | PIK3CB   | 5291  | ENSG00000051382 | validated |
| tarbase | hsa-miR-301a-3p | MPHOSPH9 | 10198 | ENSG00000051825 | validated |
| tarbase | hsa-miR-15b-5p  | PLEKHA5  | 54477 | ENSG00000052126 | validated |
| tarbase | hsa-miR-21-5p   | SIKE1    | 80143 | ENSG00000052723 | validated |
| tarbase | hsa-miR-222-3p  | RRP12    | 23223 | ENSG00000052749 | validated |
| tarbase | hsa-miR-18a-5p  | RRP12    | 23223 | ENSG00000052749 | validated |
| tarbase | hsa-miR-18a-5p  | FNIP2    | 57600 | ENSG00000052795 | validated |
| tarbase | hsa-miR-21-5p   | FNIP2    | 57600 | ENSG00000052795 | validated |
| tarbase | hsa-miR-222-3p  | FNIP2    | 57600 | ENSG00000052795 | validated |
| tarbase | hsa-miR-505-3p  | FNIP2    | 57600 | ENSG00000052795 | validated |
| tarbase | hsa-miR-181a-5p | FNIP2    | 57600 | ENSG00000052795 | validated |
| tarbase | hsa-miR-18a-5p  | MSMO1    | 6307  | ENSG00000052802 | validated |
| tarbase | hsa-miR-15b-5p  | TTC17    | 55761 | ENSG00000052841 | validated |
| tarbase | hsa-miR-181a-5p | TTC17    | 55761 | ENSG00000052841 | validated |
| tarbase | hsa-miR-212-3p  | ALX4     | 60529 | ENSG00000052850 | validated |
| tarbase | hsa-miR-18a-5p  | AKR7A2   | 8574  | ENSG00000053371 | validated |
| tarbase | hsa-miR-326     | MRT04    | 51154 | ENSG00000053372 | validated |
| tarbase | hsa-miR-582-5p  | MRT04    | 51154 | ENSG00000053372 | validated |
| tarbase | hsa-miR-212-3p  | USE1     | 55850 | ENSG00000053501 | validated |
| tarbase | hsa-miR-212-3p  | NRIP2    | 83714 | ENSG00000053702 | validated |
| tarbase | hsa-miR-106b-5p | LAMA3    | 3909  | ENSG00000053747 | validated |
| tarbase | hsa-miR-296-5p  | THRAP3   | 9967  | ENSG00000054118 | validated |
| tarbase | hsa-miR-106b-5p | LY75     | 4065  | ENSG00000054219 | validated |
| tarbase | hsa-miR-18a-5p  | LY75     | 4065  | ENSG00000054219 | validated |
| tarbase | hsa-miR-181a-5p | ARID4B   | 51742 | ENSG00000054267 | validated |
| tarbase | hsa-miR-18a-5p  | ARID4B   | 51742 | ENSG00000054267 | validated |
| tarbase | hsa-miR-212-3p  | ARID4B   | 51742 | ENSG00000054267 | validated |
| tarbase | hsa-miR-21-5p   | ARID4B   | 51742 | ENSG00000054267 | validated |
| tarbase | hsa-miR-301a-3p | ARID4B   | 51742 | ENSG00000054267 | validated |

|         |                 |            |        |                 |           |
|---------|-----------------|------------|--------|-----------------|-----------|
| tarbase | hsa-miR-212-3p  | SDCCAG8    | 10806  | ENSG00000054282 | validated |
| tarbase | hsa-miR-326     | PTPRN      | 5798   | ENSG00000054356 | validated |
| tarbase | hsa-miR-106b-5p | KIF1B      | 23095  | ENSG00000054523 | validated |
| tarbase | hsa-miR-15b-5p  | KIF1B      | 23095  | ENSG00000054523 | validated |
| tarbase | hsa-miR-181a-5p | KIF1B      | 23095  | ENSG00000054523 | validated |
| tarbase | hsa-miR-222-3p  | FOXC1      | 2296   | ENSG00000054598 | validated |
| tarbase | hsa-miR-301a-3p | SYNE2      | 23224  | ENSG00000054654 | validated |
| tarbase | hsa-miR-326     | SYNE2      | 23224  | ENSG00000054654 | validated |
| tarbase | hsa-miR-582-3p  | SYNE2      | 23224  | ENSG00000054654 | validated |
| tarbase | hsa-miR-106b-5p | ATP9A      | 10079  | ENSG00000054793 | validated |
| tarbase | hsa-miR-181a-5p | ATP9A      | 10079  | ENSG00000054793 | validated |
| tarbase | hsa-miR-212-3p  | ATP9A      | 10079  | ENSG00000054793 | validated |
| tarbase | hsa-miR-106b-5p | FAM168A    | 23201  | ENSG00000054965 | validated |
| tarbase | hsa-miR-222-3p  | RELT       | 84957  | ENSG00000054967 | validated |
| tarbase | hsa-miR-301a-3p | SZRD1      | 26099  | ENSG00000055070 | validated |
| tarbase | hsa-miR-106b-5p | CUL1       | 8454   | ENSG00000055130 | validated |
| tarbase | hsa-miR-505-3p  | FAM114A2   | 10827  | ENSG00000055147 | validated |
| tarbase | hsa-miR-106b-5p | GINM1      | 116254 | ENSG00000055211 | validated |
| tarbase | hsa-miR-18a-5p  | GINM1      | 116254 | ENSG00000055211 | validated |
| tarbase | hsa-miR-18a-5p  | EIF2AK2    | 5610   | ENSG00000055332 | validated |
| tarbase | hsa-miR-301a-3p | EIF2AK2    | 5610   | ENSG00000055332 | validated |
| tarbase | hsa-miR-212-3p  | EIF2AK2    | 5610   | ENSG00000055332 | validated |
| tarbase | hsa-miR-106b-5p | AC022966.1 | 57602  | ENSG00000055483 | validated |
| tarbase | hsa-miR-106b-5p | KMT2C      | 58508  | ENSG00000055609 | validated |
| tarbase | hsa-miR-181a-5p | KMT2C      | 58508  | ENSG00000055609 | validated |
| tarbase | hsa-miR-21-5p   | KMT2C      | 58508  | ENSG00000055609 | validated |
| tarbase | hsa-miR-222-3p  | KMT2C      | 58508  | ENSG00000055609 | validated |
| tarbase | hsa-miR-301a-3p | KMT2C      | 58508  | ENSG00000055609 | validated |
| tarbase | hsa-miR-181a-5p | CCDC85A    | 114800 | ENSG00000055813 | validated |
| tarbase | hsa-miR-106b-5p | PUM2       | 23369  | ENSG00000055917 | validated |
| tarbase | hsa-miR-15b-5p  | PUM2       | 23369  | ENSG00000055917 | validated |
| tarbase | hsa-miR-181a-5p | PUM2       | 23369  | ENSG00000055917 | validated |
| tarbase | hsa-miR-192-5p  | PUM2       | 23369  | ENSG00000055917 | validated |
| tarbase | hsa-miR-212-3p  | PUM2       | 23369  | ENSG00000055917 | validated |
| tarbase | hsa-miR-301a-3p | PUM2       | 23369  | ENSG00000055917 | validated |
| tarbase | hsa-miR-582-5p  | PUM2       | 23369  | ENSG00000055917 | validated |
| tarbase | hsa-miR-106b-5p | MRPL43     | 84545  | ENSG00000055950 | validated |
| tarbase | hsa-miR-15b-5p  | ZFR        | 51663  | ENSG00000056097 | validated |
| tarbase | hsa-miR-181a-5p | ZFR        | 51663  | ENSG00000056097 | validated |
| tarbase | hsa-miR-212-3p  | ZFR        | 51663  | ENSG00000056097 | validated |
| tarbase | hsa-miR-222-3p  | ZFR        | 51663  | ENSG00000056097 | validated |
| tarbase | hsa-miR-18a-5p  | ZNF280C    | 55609  | ENSG00000056277 | validated |
| tarbase | hsa-miR-212-3p  | ZNF280C    | 55609  | ENSG00000056277 | validated |
| tarbase | hsa-miR-106b-5p | RC3H2      | 54542  | ENSG00000056586 | validated |
| tarbase | hsa-miR-15b-5p  | RC3H2      | 54542  | ENSG00000056586 | validated |
| tarbase | hsa-miR-181a-5p | RC3H2      | 54542  | ENSG00000056586 | validated |
| tarbase | hsa-miR-212-3p  | RC3H2      | 54542  | ENSG00000056586 | validated |
| tarbase | hsa-miR-21-5p   | RC3H2      | 54542  | ENSG00000056586 | validated |
| tarbase | hsa-miR-222-3p  | RC3H2      | 54542  | ENSG00000056586 | validated |
| tarbase | hsa-miR-296-5p  | RC3H2      | 54542  | ENSG00000056586 | validated |
| tarbase | hsa-miR-301a-3p | RC3H2      | 54542  | ENSG00000056586 | validated |
| tarbase | hsa-miR-582-3p  | RC3H2      | 54542  | ENSG00000056586 | validated |
| tarbase | hsa-miR-582-5p  | RC3H2      | 54542  | ENSG00000056586 | validated |
| tarbase | hsa-miR-192-5p  | KIFC1      | 3833   | ENSG00000056678 | validated |
| tarbase | hsa-miR-181a-5p | SOAT1      | 6646   | ENSG00000057252 | validated |
| tarbase | hsa-miR-106b-5p | GDI2       | 2665   | ENSG00000057608 | validated |
| tarbase | hsa-miR-15b-5p  | GDI2       | 2665   | ENSG00000057608 | validated |
| tarbase | hsa-miR-181a-5p | GDI2       | 2665   | ENSG00000057608 | validated |
| tarbase | hsa-miR-15b-5p  | PRDM1      | 639    | ENSG00000057657 | validated |
| tarbase | hsa-miR-181a-5p | PRDM1      | 639    | ENSG00000057657 | validated |
| tarbase | hsa-miR-192-5p  | PITHD1     | 57095  | ENSG00000057757 | validated |
| tarbase | hsa-miR-212-3p  | PITHD1     | 57095  | ENSG00000057757 | validated |
| tarbase | hsa-miR-21-5p   | USP13      | 8975   | ENSG00000058056 | validated |
| tarbase | hsa-miR-301a-3p | ATP11B     | 23200  | ENSG00000058063 | validated |
| tarbase | hsa-miR-582-5p  | ATP11B     | 23200  | ENSG00000058063 | validated |
| tarbase | hsa-miR-15b-5p  | LAMC2      | 3918   | ENSG00000058085 | validated |
| tarbase | hsa-miR-106b-5p | CDK14      | 5218   | ENSG00000058091 | validated |
| tarbase | hsa-miR-582-3p  | SEC61A1    | 29927  | ENSG00000058262 | validated |
| tarbase | hsa-miR-21-5p   | SEC61A1    | 29927  | ENSG00000058262 | validated |
| tarbase | hsa-miR-106b-5p | PPP1R12A   | 4659   | ENSG00000058272 | validated |
| tarbase | hsa-miR-144-3p  | PPP1R12A   | 4659   | ENSG00000058272 | validated |

|         |                 |          |       |                 |           |
|---------|-----------------|----------|-------|-----------------|-----------|
| tarbase | hsa-miR-181a-5p | PPP1R12A | 4659  | ENSG00000058272 | validated |
| tarbase | hsa-miR-212-3p  | CAMK2B   | 816   | ENSG00000058404 | validated |
| tarbase | hsa-miR-326     | CROCC    | 9696  | ENSG00000058453 | validated |
| tarbase | hsa-miR-15b-5p  | ZC3H11A  | 9877  | ENSG00000058673 | validated |
| tarbase | hsa-miR-181a-5p | ZC3H11A  | 9877  | ENSG00000058673 | validated |
| tarbase | hsa-miR-222-3p  | ZC3H11A  | 9877  | ENSG00000058673 | validated |
| tarbase | hsa-miR-326     | ZC3H11A  | 9877  | ENSG00000058673 | validated |
| tarbase | hsa-miR-15b-5p  | NDC1     | 55706 | ENSG00000058804 | validated |
| tarbase | hsa-miR-181a-5p | NDC1     | 55706 | ENSG00000058804 | validated |
| tarbase | hsa-miR-106b-5p | UNKL     | 64718 | ENSG00000059145 | validated |
| tarbase | hsa-miR-181a-5p | UNKL     | 64718 | ENSG00000059145 | validated |
| tarbase | hsa-miR-296-5p  | UNKL     | 64718 | ENSG00000059145 | validated |
| tarbase | hsa-miR-15b-5p  | UNKL     | 64718 | ENSG00000059145 | validated |
| tarbase | hsa-miR-212-3p  | PARP12   | 64761 | ENSG00000059378 | validated |
| tarbase | hsa-miR-15b-5p  | ALDH18A1 | 5832  | ENSG00000059573 | validated |
| tarbase | hsa-miR-21-5p   | ALDH18A1 | 5832  | ENSG00000059573 | validated |
| tarbase | hsa-miR-21-5p   | TARBP1   | 6894  | ENSG00000059588 | validated |
| tarbase | hsa-miR-21-5p   | MXD1     | 4084  | ENSG00000059728 | validated |
| tarbase | hsa-miR-106b-5p | CDK17    | 5128  | ENSG00000059758 | validated |
| tarbase | hsa-miR-181a-5p | CDK17    | 5128  | ENSG00000059758 | validated |
| tarbase | hsa-miR-212-3p  | CDK17    | 5128  | ENSG00000059758 | validated |
| tarbase | hsa-miR-106b-5p | SLC2A3   | 6515  | ENSG00000059804 | validated |
| tarbase | hsa-miR-181a-5p | SLC2A3   | 6515  | ENSG00000059804 | validated |
| tarbase | hsa-miR-21-5p   | SLC2A3   | 6515  | ENSG00000059804 | validated |
| tarbase | hsa-miR-15b-5p  | PSD      | 5662  | ENSG00000059915 | validated |
| tarbase | hsa-miR-106b-5p | WNK1     | 65125 | ENSG00000060237 | validated |
| tarbase | hsa-miR-181a-5p | WNK1     | 65125 | ENSG00000060237 | validated |
| tarbase | hsa-miR-301a-3p | WNK1     | 65125 | ENSG00000060237 | validated |
| tarbase | hsa-miR-21-5p   | CCAR1    | 55749 | ENSG00000060339 | validated |
| tarbase | hsa-miR-181a-5p | CCAR1    | 55749 | ENSG00000060339 | validated |
| tarbase | hsa-miR-106b-5p | CCAR1    | 55749 | ENSG00000060339 | validated |
| tarbase | hsa-miR-15b-5p  | OGFR     | 11054 | ENSG00000060491 | validated |
| tarbase | hsa-miR-15b-5p  | PIGV     | 55650 | ENSG00000060642 | validated |
| tarbase | hsa-miR-181a-5p | SNRNP40  | 9410  | ENSG00000060688 | validated |
| tarbase | hsa-miR-18a-5p  | SNRNP40  | 9410  | ENSG00000060688 | validated |
| tarbase | hsa-miR-21-5p   | SNRNP40  | 9410  | ENSG00000060688 | validated |
| tarbase | hsa-miR-15b-5p  | QSER1    | 79832 | ENSG00000060749 | validated |
| tarbase | hsa-miR-21-5p   | QSER1    | 79832 | ENSG00000060749 | validated |
| tarbase | hsa-miR-222-3p  | QSER1    | 79832 | ENSG00000060749 | validated |
| tarbase | hsa-miR-301a-3p | QSER1    | 79832 | ENSG00000060749 | validated |
| tarbase | hsa-miR-582-3p  | QSER1    | 79832 | ENSG00000060749 | validated |
| tarbase | hsa-miR-181a-5p | BCAT1    | 586   | ENSG00000060982 | validated |
| tarbase | hsa-miR-212-3p  | BCAT1    | 586   | ENSG00000060982 | validated |
| tarbase | hsa-miR-301a-3p | BCAT1    | 586   | ENSG00000060982 | validated |
| tarbase | hsa-miR-296-5p  | LZTS1    | 11178 | ENSG00000061337 | validated |
| tarbase | hsa-miR-106b-5p | NCKAP1   | 10787 | ENSG00000061676 | validated |
| tarbase | hsa-miR-144-3p  | NCKAP1   | 10787 | ENSG00000061676 | validated |
| tarbase | hsa-miR-181a-5p | NCKAP1   | 10787 | ENSG00000061676 | validated |
| tarbase | hsa-miR-18a-5p  | NCKAP1   | 10787 | ENSG00000061676 | validated |
| tarbase | hsa-miR-301a-3p | NCKAP1   | 10787 | ENSG00000061676 | validated |
| tarbase | hsa-miR-212-3p  | MRPS35   | 60488 | ENSG00000061794 | validated |
| tarbase | hsa-miR-15b-5p  | MON2     | 23041 | ENSG00000061987 | validated |
| tarbase | hsa-miR-181a-5p | MON2     | 23041 | ENSG00000061987 | validated |
| tarbase | hsa-miR-18a-5p  | GPBP1    | 65056 | ENSG00000062194 | validated |
| tarbase | hsa-miR-181a-5p | GPBP1    | 65056 | ENSG00000062194 | validated |
| tarbase | hsa-miR-582-5p  | CS       | 1431  | ENSG00000062485 | validated |
| tarbase | hsa-miR-106b-5p | ELMO2    | 63916 | ENSG00000062598 | validated |
| tarbase | hsa-miR-15b-5p  | ELMO2    | 63916 | ENSG00000062598 | validated |
| tarbase | hsa-miR-15b-5p  | WAPL     | 23063 | ENSG00000062650 | validated |
| tarbase | hsa-miR-301a-3p | WAPL     | 23063 | ENSG00000062650 | validated |
| tarbase | hsa-miR-15b-5p  | VMP1     | 81671 | ENSG00000062716 | validated |
| tarbase | hsa-miR-106b-5p | APPBP2   | 10513 | ENSG00000062725 | validated |
| tarbase | hsa-miR-21-5p   | APPBP2   | 10513 | ENSG00000062725 | validated |
| tarbase | hsa-miR-301a-3p | APPBP2   | 10513 | ENSG00000062725 | validated |
| tarbase | hsa-miR-192-5p  | POLD1    | 5424  | ENSG00000062822 | validated |
| tarbase | hsa-miR-301a-3p | SPHK2    | 56848 | ENSG00000063176 | validated |
| tarbase | hsa-miR-212-3p  | RPL18    | 6141  | ENSG00000063177 | validated |
| tarbase | hsa-miR-296-5p  | RPL18    | 6141  | ENSG00000063177 | validated |
| tarbase | hsa-miR-15b-5p  | U2AF2    | 11338 | ENSG00000063244 | validated |
| tarbase | hsa-miR-326     | U2AF2    | 11338 | ENSG00000063244 | validated |
| tarbase | hsa-miR-15b-5p  | EPN1     | 29924 | ENSG00000063245 | validated |

|         |                 |          |        |                 |           |
|---------|-----------------|----------|--------|-----------------|-----------|
| tarbase | hsa-miR-296-5p  | EPN1     | 29924  | ENSG00000063245 | validated |
| tarbase | hsa-miR-106b-5p | AHRR     |        | ENSG00000063438 | validated |
| tarbase | hsa-miR-21-5p   | ZNF275   | 10838  | ENSG00000063587 | validated |
| tarbase | hsa-miR-15b-5p  | MTMR1    | 8776   | ENSG00000063601 | validated |
| tarbase | hsa-miR-212-3p  | MTMR1    | 8776   | ENSG00000063601 | validated |
| tarbase | hsa-miR-106b-5p | RNF4     | 6047   | ENSG00000063978 | validated |
| tarbase | hsa-miR-212-3p  | RNF4     | 6047   | ENSG00000063978 | validated |
| tarbase | hsa-miR-21-5p   | RNF4     | 6047   | ENSG00000063978 | validated |
| tarbase | hsa-miR-582-3p  | RNF4     | 6047   | ENSG00000063978 | validated |
| tarbase | hsa-miR-301a-3p | CASP8    | 841    | ENSG00000064012 | validated |
| tarbase | hsa-miR-212-3p  | CCN5     | 8839   | ENSG00000064205 | validated |
| tarbase | hsa-miR-301a-3p | DMRT3    | 58524  | ENSG00000064218 | validated |
| tarbase | hsa-miR-181a-5p | CDON     | 50937  | ENSG00000064309 | validated |
| tarbase | hsa-miR-301a-3p | TAF2     | 6873   | ENSG00000064313 | validated |
| tarbase | hsa-miR-15b-5p  | HIPK2    | 28996  | ENSG00000064393 | validated |
| tarbase | hsa-miR-18a-5p  | HIPK2    | 28996  | ENSG00000064393 | validated |
| tarbase | hsa-miR-192-5p  | HIPK2    | 28996  | ENSG00000064393 | validated |
| tarbase | hsa-miR-21-5p   | HIPK2    | 28996  | ENSG00000064393 | validated |
| tarbase | hsa-miR-106b-5p | TNPO3    | 23534  | ENSG00000064419 | validated |
| tarbase | hsa-miR-181a-5p | TNPO3    | 23534  | ENSG00000064419 | validated |
| tarbase | hsa-miR-301a-3p | TNPO3    | 23534  | ENSG00000064419 | validated |
| tarbase | hsa-miR-296-5p  | RFXANK   | 8625   | ENSG00000064490 | validated |
| tarbase | hsa-miR-15b-5p  | TMEM161A | 54929  | ENSG00000064545 | validated |
| tarbase | hsa-miR-106b-5p | CTSA     | 5476   | ENSG00000064601 | validated |
| tarbase | hsa-miR-15b-5p  | CTSA     | 5476   | ENSG00000064601 | validated |
| tarbase | hsa-miR-212-3p  | CTSA     | 5476   | ENSG00000064601 | validated |
| tarbase | hsa-miR-181a-5p | SUGP2    | 10147  | ENSG00000064607 | validated |
| tarbase | hsa-miR-582-3p  | SLC12A2  | 6558   | ENSG00000064651 | validated |
| tarbase | hsa-miR-15b-5p  | SLC12A2  | 6558   | ENSG00000064651 | validated |
| tarbase | hsa-miR-21-5p   | CNN2     | 1265   | ENSG00000064666 | validated |
| tarbase | hsa-miR-222-3p  | DDX20    | 11218  | ENSG00000064703 | validated |
| tarbase | hsa-miR-18a-5p  | BTBD1    | 53339  | ENSG00000064726 | validated |
| tarbase | hsa-miR-212-3p  | PMS1     | 5378   | ENSG00000064933 | validated |
| tarbase | hsa-miR-181a-5p | CALCRL   | 10203  | ENSG00000064989 | validated |
| tarbase | hsa-miR-106b-5p | AP3D1    | 8943   | ENSG00000065000 | validated |
| tarbase | hsa-miR-181a-5p | AP3D1    | 8943   | ENSG00000065000 | validated |
| tarbase | hsa-miR-222-3p  | ZNF76    | 7629   | ENSG00000065029 | validated |
| tarbase | hsa-miR-15b-5p  | UHRF1BP1 | 54887  | ENSG00000065060 | validated |
| tarbase | hsa-miR-106b-5p | GNAI3    | 2773   | ENSG00000065135 | validated |
| tarbase | hsa-miR-15b-5p  | GNAI3    | 2773   | ENSG00000065135 | validated |
| tarbase | hsa-miR-106b-5p | IPO5     | 3843   | ENSG00000065150 | validated |
| tarbase | hsa-miR-222-3p  | OAT      | 4942   | ENSG00000065154 | validated |
| tarbase | hsa-miR-181a-5p | OAT      | 4942   | ENSG00000065154 | validated |
| tarbase | hsa-miR-21-5p   | WDR3     | 10885  | ENSG00000065183 | validated |
| tarbase | hsa-miR-106b-5p | PKN2     | 5586   | ENSG00000065243 | validated |
| tarbase | hsa-miR-181a-5p | PKN2     | 5586   | ENSG00000065243 | validated |
| tarbase | hsa-miR-18a-5p  | TRAM2    | 9697   | ENSG00000065308 | validated |
| tarbase | hsa-miR-212-3p  | TRAM2    | 9697   | ENSG00000065308 | validated |
| tarbase | hsa-miR-15b-5p  | NTN1     | 9423   | ENSG00000065320 | validated |
| tarbase | hsa-miR-106b-5p | MCM10    | 55388  | ENSG00000065328 | validated |
| tarbase | hsa-miR-181a-5p | ANKRD44  | 91526  | ENSG00000065413 | validated |
| tarbase | hsa-miR-15b-5p  | KARS1    | 3735   | ENSG00000065427 | validated |
| tarbase | hsa-miR-222-3p  | KARS1    | 3735   | ENSG00000065427 | validated |
| tarbase | hsa-miR-15b-5p  | SPEN     | 23013  | ENSG00000065526 | validated |
| tarbase | hsa-miR-181a-5p | SPEN     | 23013  | ENSG00000065526 | validated |
| tarbase | hsa-miR-21-5p   | SPEN     | 23013  | ENSG00000065526 | validated |
| tarbase | hsa-miR-296-5p  | SPEN     | 23013  | ENSG00000065526 | validated |
| tarbase | hsa-miR-301a-3p | SPEN     | 23013  | ENSG00000065526 | validated |
| tarbase | hsa-miR-326     | SPEN     | 23013  | ENSG00000065526 | validated |
| tarbase | hsa-miR-222-3p  | ZC3H15   | 55854  | ENSG00000065548 | validated |
| tarbase | hsa-miR-21-5p   | MAP2K4   | 6416   | ENSG00000065559 | validated |
| tarbase | hsa-miR-15b-5p  | PACC1    | 55248  | ENSG00000065600 | validated |
| tarbase | hsa-miR-181a-5p | SLK      | 9748   | ENSG00000065613 | validated |
| tarbase | hsa-miR-15b-5p  | SLK      | 9748   | ENSG00000065613 | validated |
| tarbase | hsa-miR-21-5p   | CYB5R4   | 51167  | ENSG00000065615 | validated |
| tarbase | hsa-miR-212-3p  | COL17A1  | 1308   | ENSG00000065618 | validated |
| tarbase | hsa-miR-21-5p   | GSTO2    | 119391 | ENSG00000065621 | validated |
| tarbase | hsa-miR-15b-5p  | SEC61A2  | 55176  | ENSG00000065665 | validated |
| tarbase | hsa-miR-296-5p  | SEC61A2  | 55176  | ENSG00000065665 | validated |
| tarbase | hsa-miR-15b-5p  | ASB1     | 51665  | ENSG00000065802 | validated |
| tarbase | hsa-miR-18a-5p  | ASB1     | 51665  | ENSG00000065802 | validated |

|         |                 |         |        |                 |           |
|---------|-----------------|---------|--------|-----------------|-----------|
| tarbase | hsa-miR-212-3p  | ASB1    | 51665  | ENSG00000065802 | validated |
| tarbase | hsa-miR-144-3p  | ME1     | 4199   | ENSG00000065833 | validated |
| tarbase | hsa-miR-212-3p  | ME1     | 4199   | ENSG00000065833 | validated |
| tarbase | hsa-miR-21-5p   | ME1     | 4199   | ENSG00000065833 | validated |
| tarbase | hsa-miR-582-5p  | ME1     | 4199   | ENSG00000065833 | validated |
| tarbase | hsa-miR-18a-5p  | TBC1D1  | 23216  | ENSG00000065882 | validated |
| tarbase | hsa-miR-582-3p  | CDK13   | 8621   | ENSG00000065883 | validated |
| tarbase | hsa-miR-582-5p  | CDK13   | 8621   | ENSG00000065883 | validated |
| tarbase | hsa-miR-301a-3p | MTHFD2  | 10797  | ENSG00000065911 | validated |
| tarbase | hsa-miR-582-3p  | MTHFD2  | 10797  | ENSG00000065911 | validated |
| tarbase | hsa-miR-15b-5p  | MTHFD2  | 10797  | ENSG00000065911 | validated |
| tarbase | hsa-miR-106b-5p | PDE4A   | 5141   | ENSG00000065989 | validated |
| tarbase | hsa-miR-181a-5p | ELAVL1  | 1994   | ENSG00000066044 | validated |
| tarbase | hsa-miR-18a-5p  | ELAVL1  | 1994   | ENSG00000066044 | validated |
| tarbase | hsa-miR-326     | ELAVL1  | 1994   | ENSG00000066044 | validated |
| tarbase | hsa-miR-181a-5p | DIP2B   | 57609  | ENSG00000066084 | validated |
| tarbase | hsa-miR-144-3p  | SMARCD1 | 6602   | ENSG00000066117 | validated |
| tarbase | hsa-miR-181a-5p | SMARCD1 | 6602   | ENSG00000066117 | validated |
| tarbase | hsa-miR-18a-5p  | SMARCD1 | 6602   | ENSG00000066117 | validated |
| tarbase | hsa-miR-21-5p   | SMARCD1 | 6602   | ENSG00000066117 | validated |
| tarbase | hsa-miR-582-3p  | SMARCD1 | 6602   | ENSG00000066117 | validated |
| tarbase | hsa-miR-106b-5p | KDM4A   | 9682   | ENSG00000066135 | validated |
| tarbase | hsa-miR-181a-5p | NFYC    | 4802   | ENSG00000066136 | validated |
| tarbase | hsa-miR-15b-5p  | ASPM    | 259266 | ENSG00000066279 | validated |
| tarbase | hsa-miR-18a-5p  | ASPM    | 259266 | ENSG00000066279 | validated |
| tarbase | hsa-miR-301a-3p | ASPM    | 259266 | ENSG00000066279 | validated |
| tarbase | hsa-miR-212-3p  | ASPM    | 259266 | ENSG00000066279 | validated |
| tarbase | hsa-miR-21-5p   | ASPM    | 259266 | ENSG00000066279 | validated |
| tarbase | hsa-miR-212-3p  | ELOVL1  | 64834  | ENSG00000066322 | validated |
| tarbase | hsa-miR-192-5p  | MPPED2  | 744    | ENSG00000066382 | validated |
| tarbase | hsa-miR-15b-5p  | ZBTB11  | 27107  | ENSG00000066422 | validated |
| tarbase | hsa-miR-181a-5p | ZBTB11  | 27107  | ENSG00000066422 | validated |
| tarbase | hsa-miR-106b-5p | ATXN3   | 4287   | ENSG00000066427 | validated |
| tarbase | hsa-miR-181a-5p | ATXN3   | 4287   | ENSG00000066427 | validated |
| tarbase | hsa-miR-301a-3p | ATXN3   | 4287   | ENSG00000066427 | validated |
| tarbase | hsa-miR-15b-5p  | ISOC1   | 51015  | ENSG00000066583 | validated |
| tarbase | hsa-miR-15b-5p  | THUMPD1 | 55623  | ENSG00000066654 | validated |
| tarbase | hsa-miR-181a-5p | THUMPD1 | 55623  | ENSG00000066654 | validated |
| tarbase | hsa-miR-212-3p  | MSANTD3 | 91283  | ENSG00000066697 | validated |
| tarbase | hsa-miR-212-3p  | ARFGEF1 | 10565  | ENSG00000066777 | validated |
| tarbase | hsa-miR-21-5p   | ARFGEF1 | 10565  | ENSG00000066777 | validated |
| tarbase | hsa-miR-212-3p  | MTFR1   | 9650   | ENSG00000066855 | validated |
| tarbase | hsa-miR-15b-5p  | FECH    | 2235   | ENSG00000066926 | validated |
| tarbase | hsa-miR-301a-3p | FECH    | 2235   | ENSG00000066926 | validated |
| tarbase | hsa-miR-106b-5p | FECH    | 2235   | ENSG00000066926 | validated |
| tarbase | hsa-miR-181a-5p | MYO9A   | 4649   | ENSG00000066933 | validated |
| tarbase | hsa-miR-212-3p  | MYO9A   | 4649   | ENSG00000066933 | validated |
| tarbase | hsa-miR-181a-5p | DDX3Y   | 8653   | ENSG00000067048 | validated |
| tarbase | hsa-miR-222-3p  | DDX3Y   | 8653   | ENSG00000067048 | validated |
| tarbase | hsa-miR-301a-3p | DDX3Y   | 8653   | ENSG00000067048 | validated |
| tarbase | hsa-miR-106b-5p | DDX3Y   | 8653   | ENSG00000067048 | validated |
| tarbase | hsa-miR-21-5p   | DDX3Y   | 8653   | ENSG00000067048 | validated |
| tarbase | hsa-miR-18a-5p  | PFKP    | 5214   | ENSG00000067057 | validated |
| tarbase | hsa-miR-582-5p  | PFKP    | 5214   | ENSG00000067057 | validated |
| tarbase | hsa-miR-212-3p  | PFKP    | 5214   | ENSG00000067057 | validated |
| tarbase | hsa-miR-181a-5p | IDI1    | 3422   | ENSG00000067064 | validated |
| tarbase | hsa-miR-21-5p   | IDI1    | 3422   | ENSG00000067064 | validated |
| tarbase | hsa-miR-212-3p  | SP100   | 6672   | ENSG00000067066 | validated |
| tarbase | hsa-miR-505-3p  | KLF6    | 1316   | ENSG00000067082 | validated |
| tarbase | hsa-miR-18a-5p  | KLF6    | 1316   | ENSG00000067082 | validated |
| tarbase | hsa-miR-181a-5p | NEO1    | 4756   | ENSG00000067141 | validated |
| tarbase | hsa-miR-301a-3p | NEO1    | 4756   | ENSG00000067141 | validated |
| tarbase | hsa-miR-222-3p  | TRAM1   | 23471  | ENSG00000067167 | validated |
| tarbase | hsa-miR-326     | PHKA1   | 5255   | ENSG00000067177 | validated |
| tarbase | hsa-miR-15b-5p  | PKM     | 5315   | ENSG00000067225 | validated |
| tarbase | hsa-miR-296-5p  | PKM     | 5315   | ENSG00000067225 | validated |
| tarbase | hsa-miR-582-3p  | PKM     | 5315   | ENSG00000067225 | validated |
| tarbase | hsa-miR-301a-3p | DNTTIP2 | 30836  | ENSG00000067334 | validated |
| tarbase | hsa-miR-181a-5p | DNTTIP2 | 30836  | ENSG00000067334 | validated |
| tarbase | hsa-miR-21-5p   | TP53BP1 | 7158   | ENSG00000067369 | validated |
| tarbase | hsa-miR-301a-3p | RHOA    | 387    | ENSG00000067560 | validated |

|         |                 |         |        |                 |           |
|---------|-----------------|---------|--------|-----------------|-----------|
| tarbase | hsa-miR-18a-5p  | DHX8    | 1659   | ENSG00000067596 | validated |
| tarbase | hsa-miR-222-3p  | DHX8    | 1659   | ENSG00000067596 | validated |
| tarbase | hsa-miR-582-5p  | IARS2   | 55699  | ENSG00000067704 | validated |
| tarbase | hsa-miR-15b-5p  | ROGDI   | 79641  | ENSG00000067836 | validated |
| tarbase | hsa-miR-212-3p  | ROGDI   | 79641  | ENSG00000067836 | validated |
| tarbase | hsa-miR-582-5p  | ROCK1   | 6093   | ENSG00000067900 | validated |
| tarbase | hsa-miR-106b-5p | CBFB    | 865    | ENSG00000067955 | validated |
| tarbase | hsa-miR-15b-5p  | CBFB    | 865    | ENSG00000067955 | validated |
| tarbase | hsa-miR-21-5p   | CBFB    | 865    | ENSG00000067955 | validated |
| tarbase | hsa-miR-222-3p  | CBFB    | 865    | ENSG00000067955 | validated |
| tarbase | hsa-miR-301a-3p | CBFB    | 865    | ENSG00000067955 | validated |
| tarbase | hsa-miR-582-5p  | CBFB    | 865    | ENSG00000067955 | validated |
| tarbase | hsa-miR-192-5p  | CBFB    | 865    | ENSG00000067955 | validated |
| tarbase | hsa-miR-212-3p  | HDAC4   | 9759   | ENSG00000068024 | validated |
| tarbase | hsa-miR-212-3p  | IFI35   | 3430   | ENSG00000068079 | validated |
| tarbase | hsa-miR-18a-5p  | HEATR6  | 63897  | ENSG00000068097 | validated |
| tarbase | hsa-miR-15b-5p  | COASY   | 80347  | ENSG00000068120 | validated |
| tarbase | hsa-miR-181a-5p | COASY   | 80347  | ENSG00000068120 | validated |
| tarbase | hsa-miR-505-3p  | COASY   | 80347  | ENSG00000068120 | validated |
| tarbase | hsa-miR-106b-5p | MEF2A   | 4205   | ENSG00000068305 | validated |
| tarbase | hsa-miR-15b-5p  | TBC1D25 | 4943   | ENSG00000068354 | validated |
| tarbase | hsa-miR-15b-5p  | ACSL4   | 2182   | ENSG00000068366 | validated |
| tarbase | hsa-miR-181a-5p | ACSL4   | 2182   | ENSG00000068366 | validated |
| tarbase | hsa-miR-21-5p   | ACSL4   | 2182   | ENSG00000068366 | validated |
| tarbase | hsa-miR-582-5p  | INPP5A  | 3632   | ENSG00000068383 | validated |
| tarbase | hsa-miR-144-3p  | PRR11   | 55771  | ENSG00000068489 | validated |
| tarbase | hsa-miR-18a-5p  | REEP1   | 65055  | ENSG00000068615 | validated |
| tarbase | hsa-miR-301a-3p | ATP11A  | 23250  | ENSG00000068650 | validated |
| tarbase | hsa-miR-15b-5p  | POLR1A  | 25885  | ENSG00000068654 | validated |
| tarbase | hsa-miR-15b-5p  | LAPTM4A | 9741   | ENSG00000068697 | validated |
| tarbase | hsa-miR-296-5p  | LAPTM4A | 9741   | ENSG00000068697 | validated |
| tarbase | hsa-miR-18a-5p  | LAPTM4A | 9741   | ENSG00000068697 | validated |
| tarbase | hsa-miR-21-5p   | LAPTM4A | 9741   | ENSG00000068697 | validated |
| tarbase | hsa-miR-212-3p  | TTC7A   | 57217  | ENSG00000068724 | validated |
| tarbase | hsa-miR-326     | IP6K2   | 51447  | ENSG00000068745 | validated |
| tarbase | hsa-miR-15b-5p  | KIF2A   | 3796   | ENSG00000068796 | validated |
| tarbase | hsa-miR-301a-3p | PSME4   | 23198  | ENSG00000068878 | validated |
| tarbase | hsa-miR-181a-5p | IFT80   | 57560  | ENSG00000068885 | validated |
| tarbase | hsa-miR-106b-5p | MAST4   | 375449 | ENSG00000069020 | validated |
| tarbase | hsa-miR-15b-5p  | MAST4   | 375449 | ENSG00000069020 | validated |
| tarbase | hsa-miR-296-5p  | MAST4   | 375449 | ENSG00000069020 | validated |
| tarbase | hsa-miR-15b-5p  | ADGRF5  | 221395 | ENSG00000069122 | validated |
| tarbase | hsa-miR-106b-5p | NUP133  | 55746  | ENSG00000069248 | validated |
| tarbase | hsa-miR-301a-3p | NUP133  | 55746  | ENSG00000069248 | validated |
| tarbase | hsa-miR-106b-5p | NUCKS1  | 64710  | ENSG00000069275 | validated |
| tarbase | hsa-miR-181a-5p | NUCKS1  | 64710  | ENSG00000069275 | validated |
| tarbase | hsa-miR-18a-5p  | NUCKS1  | 64710  | ENSG00000069275 | validated |
| tarbase | hsa-miR-212-3p  | NUCKS1  | 64710  | ENSG00000069275 | validated |
| tarbase | hsa-miR-222-3p  | NUCKS1  | 64710  | ENSG00000069275 | validated |
| tarbase | hsa-miR-296-5p  | NUCKS1  | 64710  | ENSG00000069275 | validated |
| tarbase | hsa-miR-582-3p  | NUCKS1  | 64710  | ENSG00000069275 | validated |
| tarbase | hsa-miR-582-5p  | NUCKS1  | 64710  | ENSG00000069275 | validated |
| tarbase | hsa-miR-15b-5p  | DNAJA2  | 10294  | ENSG00000069345 | validated |
| tarbase | hsa-miR-181a-5p | DNAJA2  | 10294  | ENSG00000069345 | validated |
| tarbase | hsa-miR-582-3p  | ABCC9   | 10060  | ENSG00000069431 | validated |
| tarbase | hsa-miR-18a-5p  | GAL     | 51083  | ENSG00000069482 | validated |
| tarbase | hsa-miR-181a-5p | RORA    | 6095   | ENSG00000069667 | validated |
| tarbase | hsa-miR-192-5p  | RORA    | 6095   | ENSG00000069667 | validated |
| tarbase | hsa-miR-582-5p  | RORA    | 6095   | ENSG00000069667 | validated |
| tarbase | hsa-miR-15b-5p  | RORA    | 6095   | ENSG00000069667 | validated |
| tarbase | hsa-miR-582-3p  | TGFBR3  | 7049   | ENSG00000069702 | validated |
| tarbase | hsa-miR-212-3p  |         |        | ENSG00000069712 | validated |
| tarbase | hsa-miR-18a-5p  | NEDD4   | 4734   | ENSG00000069869 | validated |
| tarbase | hsa-miR-15b-5p  | PIGB    | 9488   | ENSG00000069943 | validated |
| tarbase | hsa-miR-181a-5p | MAPK6   | 5597   | ENSG00000069956 | validated |
| tarbase | hsa-miR-181a-5p | RAB27A  | 5873   | ENSG00000069974 | validated |
| tarbase | hsa-miR-181a-5p | LRP6    | 4040   | ENSG00000070018 | validated |
| tarbase | hsa-miR-21-5p   | PHRF1   | 57661  | ENSG00000070047 | validated |
| tarbase | hsa-miR-106b-5p | PFN2    | 5217   | ENSG00000070087 | validated |
| tarbase | hsa-miR-15b-5p  | PFN2    | 5217   | ENSG00000070087 | validated |
| tarbase | hsa-miR-181a-5p | PFN2    | 5217   | ENSG00000070087 | validated |



|         |                 |            |        |                 |           |
|---------|-----------------|------------|--------|-----------------|-----------|
| tarbase | hsa-miR-15b-5p  | PTPN3      | 5774   | ENSG00000070159 | validated |
| tarbase | hsa-miR-15b-5p  | SLC44A1    | 23446  | ENSG00000070214 | validated |
| tarbase | hsa-miR-21-5p   | SLC44A1    | 23446  | ENSG00000070214 | validated |
| tarbase | hsa-miR-222-3p  | SLC44A1    | 23446  | ENSG00000070214 | validated |
| tarbase | hsa-miR-301a-3p | SLC44A1    | 23446  | ENSG00000070214 | validated |
| tarbase | hsa-miR-582-5p  | SLC44A1    | 23446  | ENSG00000070214 | validated |
| tarbase | hsa-miR-181a-5p | SLC44A1    | 23446  | ENSG00000070214 | validated |
| tarbase | hsa-miR-301a-3p | EXOC5      | 10640  | ENSG00000070367 | validated |
| tarbase | hsa-miR-181a-5p | EXOC5      | 10640  | ENSG00000070367 | validated |
| tarbase | hsa-miR-181a-5p | DGCR2      | 9993   | ENSG00000070413 | validated |
| tarbase | hsa-miR-15b-5p  | MNT        | 4335   | ENSG00000070444 | validated |
| tarbase | hsa-miR-301a-3p | MNT        | 4335   | ENSG00000070444 | validated |
| tarbase | hsa-miR-582-5p  | MNT        | 4335   | ENSG00000070444 | validated |
| tarbase | hsa-miR-106b-5p | WIP1       | 55062  | ENSG00000070540 | validated |
| tarbase | hsa-miR-181a-5p | GBA2       | 57704  | ENSG00000070610 | validated |
| tarbase | hsa-miR-15b-5p  | NDST1      | 3340   | ENSG00000070614 | validated |
| tarbase | hsa-miR-18a-5p  | NDST1      | 3340   | ENSG00000070614 | validated |
| tarbase | hsa-miR-21-5p   | ASNS       | 440    | ENSG00000070669 | validated |
| tarbase | hsa-miR-15b-5p  | ST6GALNAC2 | 10610  | ENSG00000070731 | validated |
| tarbase | hsa-miR-212-3p  | ST6GALNAC2 | 10610  | ENSG00000070731 | validated |
| tarbase | hsa-miR-18a-5p  | PABPC1     | 26986  | ENSG00000070756 | validated |
| tarbase | hsa-miR-212-3p  | PABPC1     | 26986  | ENSG00000070756 | validated |
| tarbase | hsa-miR-222-3p  | PABPC1     | 26986  | ENSG00000070756 | validated |
| tarbase | hsa-miR-212-3p  | CSNK2A2    | 1459   | ENSG00000070770 | validated |
| tarbase | hsa-miR-21-5p   | PTPN21     | 11099  | ENSG00000070778 | validated |
| tarbase | hsa-miR-15b-5p  | CDC42      | 998    | ENSG00000070831 | validated |
| tarbase | hsa-miR-582-3p  | CDC42      | 998    | ENSG00000070831 | validated |
| tarbase | hsa-miR-106b-5p | RAD18      | 56852  | ENSG00000070950 | validated |
| tarbase | hsa-miR-181a-5p | RAD18      | 56852  | ENSG00000070950 | validated |
| tarbase | hsa-miR-15b-5p  | ATP2B1     | 490    | ENSG00000070961 | validated |
| tarbase | hsa-miR-18a-5p  | ATP2B1     | 490    | ENSG00000070961 | validated |
| tarbase | hsa-miR-212-3p  | ATP2B1     | 490    | ENSG00000070961 | validated |
| tarbase | hsa-miR-21-5p   | ATP2B1     | 490    | ENSG00000070961 | validated |
| tarbase | hsa-miR-18a-5p  | MAP4K4     | 9448   | ENSG00000071054 | validated |
| tarbase | hsa-miR-144-3p  | MGAT4A     | 11320  | ENSG00000071073 | validated |
| tarbase | hsa-miR-15b-5p  | MGAT4A     | 11320  | ENSG00000071073 | validated |
| tarbase | hsa-miR-301a-3p | MGAT4A     | 11320  | ENSG00000071073 | validated |
| tarbase | hsa-miR-212-3p  | RPL31      | 6160   | ENSG00000071082 | validated |
| tarbase | hsa-miR-301a-3p | WDR1       | 9948   | ENSG00000071127 | validated |
| tarbase | hsa-miR-18a-5p  | SNX13      | 23161  | ENSG00000071189 | validated |
| tarbase | hsa-miR-21-5p   | SNX13      | 23161  | ENSG00000071189 | validated |
| tarbase | hsa-miR-106b-5p | ING3       | 54556  | ENSG00000071243 | validated |
| tarbase | hsa-miR-181a-5p | VASH1      | 22846  | ENSG00000071246 | validated |
| tarbase | hsa-miR-106b-5p | LMCD1      | 29995  | ENSG00000071282 | validated |
| tarbase | hsa-miR-106b-5p | BUD23      | 114049 | ENSG00000071462 | validated |
| tarbase | hsa-miR-18a-5p  | BUD23      | 114049 | ENSG00000071462 | validated |
| tarbase | hsa-miR-301a-3p | BUD23      | 114049 | ENSG00000071462 | validated |
| tarbase | hsa-miR-181a-5p | SEL1L      | 6400   | ENSG00000071537 | validated |
| tarbase | hsa-miR-18a-5p  | SEL1L      | 6400   | ENSG00000071537 | validated |
| tarbase | hsa-miR-18a-5p  | TRIB2      | 28951  | ENSG00000071575 | validated |
| tarbase | hsa-miR-15b-5p  | MBD3       | 53615  | ENSG00000071655 | validated |
| tarbase | hsa-miR-181a-5p | MBD3       | 53615  | ENSG00000071655 | validated |
| tarbase | hsa-miR-18a-5p  | MBD3       | 53615  | ENSG00000071655 | validated |
| tarbase | hsa-miR-296-5p  | MBD3       | 53615  | ENSG00000071655 | validated |
| tarbase | hsa-miR-15b-5p  | RDH11      | 51109  | ENSG00000072042 | validated |
| tarbase | hsa-miR-192-5p  | RDH11      | 51109  | ENSG00000072042 | validated |
| tarbase | hsa-miR-15b-5p  | PRKACA     | 5566   | ENSG00000072062 | validated |
| tarbase | hsa-miR-15b-5p  | ADGRL1     | 22859  | ENSG00000072071 | validated |
| tarbase | hsa-miR-181a-5p | ZFYVE26    | 23503  | ENSG00000072121 | validated |
| tarbase | hsa-miR-18a-5p  | ZFYVE26    | 23503  | ENSG00000072121 | validated |
| tarbase | hsa-miR-192-5p  | ZFYVE26    | 23503  | ENSG00000072121 | validated |
| tarbase | hsa-miR-212-3p  | ZFYVE26    | 23503  | ENSG00000072121 | validated |
| tarbase | hsa-miR-181a-5p | EPN2       | 22905  | ENSG00000072134 | validated |
| tarbase | hsa-miR-296-5p  | ALDH3A2    | 224    | ENSG00000072210 | validated |
| tarbase | hsa-miR-106b-5p | ALDH3A2    | 224    | ENSG00000072210 | validated |
| tarbase | hsa-miR-21-5p   | TFRC       | 7037   | ENSG00000072274 | validated |
| tarbase | hsa-miR-582-3p  | TFRC       | 7037   | ENSG00000072274 | validated |
| tarbase | hsa-miR-18a-5p  | SREBF1     | 6720   | ENSG00000072310 | validated |
| tarbase | hsa-miR-192-5p  | SREBF1     | 6720   | ENSG00000072310 | validated |
| tarbase | hsa-miR-106b-5p | AFF4       | 27125  | ENSG00000072364 | validated |
| tarbase | hsa-miR-21-5p   | AFF4       | 27125  | ENSG00000072364 | validated |

|         |                 |         |       |                 |           |
|---------|-----------------|---------|-------|-----------------|-----------|
| tarbase | hsa-miR-505-3p  | AFF4    | 27125 | ENSG00000072364 | validated |
| tarbase | hsa-miR-15b-5p  | UBE2D1  | 7321  | ENSG00000072401 | validated |
| tarbase | hsa-miR-222-3p  | UBE2D1  | 7321  | ENSG00000072401 | validated |
| tarbase | hsa-miR-326     | UBE2D1  | 7321  | ENSG00000072401 | validated |
| tarbase | hsa-miR-21-5p   | UBE2D1  | 7321  | ENSG00000072401 | validated |
| tarbase | hsa-miR-301a-3p | MPP5    | 64398 | ENSG00000072415 | validated |
| tarbase | hsa-miR-106b-5p | SMC1A   | 8243  | ENSG00000072501 | validated |
| tarbase | hsa-miR-181a-5p | SMC1A   | 8243  | ENSG00000072501 | validated |
| tarbase | hsa-miR-181a-5p | MARK2   | 2011  | ENSG00000072518 | validated |
| tarbase | hsa-miR-18a-5p  | MARK2   | 2011  | ENSG00000072518 | validated |
| tarbase | hsa-miR-212-3p  | HMMR    | 3161  | ENSG00000072571 | validated |
| tarbase | hsa-miR-15b-5p  | NFATC3  | 4775  | ENSG00000072736 | validated |
| tarbase | hsa-miR-18a-5p  | NFATC3  | 4775  | ENSG00000072736 | validated |
| tarbase | hsa-miR-192-5p  | NFATC3  | 4775  | ENSG00000072736 | validated |
| tarbase | hsa-miR-222-3p  | NFATC3  | 4775  | ENSG00000072736 | validated |
| tarbase | hsa-miR-212-3p  | FBXW11  | 23291 | ENSG00000072803 | validated |
| tarbase | hsa-miR-106b-5p | DERL2   | 51009 | ENSG00000072849 | validated |
| tarbase | hsa-miR-181a-5p | DERL2   | 51009 | ENSG00000072849 | validated |
| tarbase | hsa-miR-106b-5p | MCM2    | 4171  | ENSG00000073111 | validated |
| tarbase | hsa-miR-15b-5p  | CLCN4   | 1183  | ENSG00000073464 | validated |
| tarbase | hsa-miR-505-3p  | KDM5A   | 5927  | ENSG00000073614 | validated |
| tarbase | hsa-miR-582-5p  | KDM5A   | 5927  | ENSG00000073614 | validated |
| tarbase | hsa-miR-106b-5p | PPP2R3A | 5523  | ENSG00000073711 | validated |
| tarbase | hsa-miR-181a-5p | PPP2R3A | 5523  | ENSG00000073711 | validated |
| tarbase | hsa-miR-18a-5p  | PPP2R3A | 5523  | ENSG00000073711 | validated |
| tarbase | hsa-miR-106b-5p | FERMT2  | 10979 | ENSG00000073712 | validated |
| tarbase | hsa-miR-222-3p  | FERMT2  | 10979 | ENSG00000073712 | validated |
| tarbase | hsa-miR-212-3p  | PTGS2   | 5743  | ENSG00000073756 | validated |
| tarbase | hsa-miR-582-5p  | PTGS2   | 5743  | ENSG00000073756 | validated |
| tarbase | hsa-miR-181a-5p | MAP3K13 | 9175  | ENSG00000073803 | validated |
| tarbase | hsa-miR-212-3p  | PICALM  | 8301  | ENSG00000073921 | validated |
| tarbase | hsa-miR-15b-5p  | NSF     | 4905  | ENSG00000073969 | validated |
| tarbase | hsa-miR-15b-5p  | GLI2    | 2736  | ENSG00000074047 | validated |
| tarbase | hsa-miR-15b-5p  | CLASP1  | 23332 | ENSG00000074054 | validated |
| tarbase | hsa-miR-181a-5p | CLASP1  | 23332 | ENSG00000074054 | validated |
| tarbase | hsa-miR-15b-5p  | NOTCH3  | 4854  | ENSG00000074181 | validated |
| tarbase | hsa-miR-15b-5p  | CLNS1A  | 1207  | ENSG00000074201 | validated |
| tarbase | hsa-miR-21-5p   | CLNS1A  | 1207  | ENSG00000074201 | validated |
| tarbase | hsa-miR-326     | TEAD2   | 8463  | ENSG00000074219 | validated |
| tarbase | hsa-miR-582-5p  | TSG101  | 7251  | ENSG00000074319 | validated |
| tarbase | hsa-miR-212-3p  | NCBP3   | 55421 | ENSG00000074356 | validated |
| tarbase | hsa-miR-18a-5p  | ATP2A3  | 489   | ENSG00000074370 | validated |
| tarbase | hsa-miR-326     | ATP2A3  | 489   | ENSG00000074370 | validated |
| tarbase | hsa-miR-181a-5p | CA12    | 771   | ENSG00000074410 | validated |
| tarbase | hsa-miR-301a-3p | CA12    | 771   | ENSG00000074410 | validated |
| tarbase | hsa-miR-106b-5p | NTN4    | 59277 | ENSG00000074527 | validated |
| tarbase | hsa-miR-212-3p  | NTN4    | 59277 | ENSG00000074527 | validated |
| tarbase | hsa-miR-18a-5p  | DPP8    | 54878 | ENSG00000074603 | validated |
| tarbase | hsa-miR-21-5p   | DPP8    | 54878 | ENSG00000074603 | validated |
| tarbase | hsa-miR-301a-3p | DPP8    | 54878 | ENSG00000074603 | validated |
| tarbase | hsa-miR-15b-5p  | ZNF532  | 55205 | ENSG00000074657 | validated |
| tarbase | hsa-miR-15b-5p  | LMAN1   | 3998  | ENSG00000074695 | validated |
| tarbase | hsa-miR-15b-5p  | IPCEF1  | 26034 | ENSG00000074706 | validated |
| tarbase | hsa-miR-106b-5p | ZZEF1   | 23140 | ENSG00000074755 | validated |
| tarbase | hsa-miR-326     | ZZEF1   | 23140 | ENSG00000074755 | validated |
| tarbase | hsa-miR-106b-5p | ENO1    | 2023  | ENSG00000074800 | validated |
| tarbase | hsa-miR-181a-5p | ENO1    | 2023  | ENSG00000074800 | validated |
| tarbase | hsa-miR-296-5p  | ENO1    | 2023  | ENSG00000074800 | validated |
| tarbase | hsa-miR-301a-3p | ENO1    | 2023  | ENSG00000074800 | validated |
| tarbase | hsa-miR-18a-5p  | MYDGF   | 56005 | ENSG00000074842 | validated |
| tarbase | hsa-miR-212-3p  | TUBE1   | 51175 | ENSG00000074935 | validated |
| tarbase | hsa-miR-106b-5p | ACTR6   | 64431 | ENSG00000075089 | validated |
| tarbase | hsa-miR-106b-5p | TIPIN   | 54962 | ENSG00000075131 | validated |
| tarbase | hsa-miR-144-3p  | TIPIN   | 54962 | ENSG00000075131 | validated |
| tarbase | hsa-miR-21-5p   | TIPIN   | 54962 | ENSG00000075131 | validated |
| tarbase | hsa-miR-106b-5p | EIF4G3  | 8672  | ENSG00000075151 | validated |
| tarbase | hsa-miR-15b-5p  | EIF4G3  | 8672  | ENSG00000075151 | validated |
| tarbase | hsa-miR-21-5p   | EIF4G3  | 8672  | ENSG00000075151 | validated |
| tarbase | hsa-miR-222-3p  | EIF4G3  | 8672  | ENSG00000075151 | validated |
| tarbase | hsa-miR-106b-5p | SEMA3A  | 10371 | ENSG00000075213 | validated |
| tarbase | hsa-miR-15b-5p  | SEMA3A  | 10371 | ENSG00000075213 | validated |

|         |                 |          |       |                 |           |
|---------|-----------------|----------|-------|-----------------|-----------|
| tarbase | hsa-miR-212-3p  | SEMA3A   | 10371 | ENSG00000075213 | validated |
| tarbase | hsa-miR-181a-5p | GTSE1    | 51512 | ENSG00000075218 | validated |
| tarbase | hsa-miR-15b-5p  | SEMA3C   | 10512 | ENSG00000075223 | validated |
| tarbase | hsa-miR-181a-5p | SEMA3C   | 10512 | ENSG00000075223 | validated |
| tarbase | hsa-miR-106b-5p | SEMA3C   | 10512 | ENSG00000075223 | validated |
| tarbase | hsa-miR-301a-3p | CELSR1   | 9620  | ENSG00000075275 | validated |
| tarbase | hsa-miR-144-3p  | ZNF638   | 27332 | ENSG00000075292 | validated |
| tarbase | hsa-miR-181a-5p | ZNF638   | 27332 | ENSG00000075292 | validated |
| tarbase | hsa-miR-222-3p  | ZNF638   | 27332 | ENSG00000075292 | validated |
| tarbase | hsa-miR-326     | ZNF638   | 27332 | ENSG00000075292 | validated |
| tarbase | hsa-miR-212-3p  | SLC25A40 | 55972 | ENSG00000075303 | validated |
| tarbase | hsa-miR-505-3p  | SLC25A40 | 55972 | ENSG00000075303 | validated |
| tarbase | hsa-miR-582-3p  | TIMM21   | 29090 | ENSG00000075336 | validated |
| tarbase | hsa-miR-212-3p  | VPS9D1   | 9605  | ENSG00000075399 | validated |
| tarbase | hsa-miR-326     | ZNF37A   | 7587  | ENSG00000075407 | validated |
| tarbase | hsa-miR-181a-5p | ZNF37A   | 7587  | ENSG00000075407 | validated |
| tarbase | hsa-miR-21-5p   | MARK3    | 4140  | ENSG00000075413 | validated |
| tarbase | hsa-miR-15b-5p  | SLC25A3  | 5250  | ENSG00000075415 | validated |
| tarbase | hsa-miR-212-3p  | SLC25A3  | 5250  | ENSG00000075415 | validated |
| tarbase | hsa-miR-301a-3p | SLC25A3  | 5250  | ENSG00000075415 | validated |
| tarbase | hsa-miR-106b-5p | FNDC3B   | 64778 | ENSG00000075420 | validated |
| tarbase | hsa-miR-15b-5p  | FNDC3B   | 64778 | ENSG00000075420 | validated |
| tarbase | hsa-miR-212-3p  | FNDC3B   | 64778 | ENSG00000075420 | validated |
| tarbase | hsa-miR-21-5p   | FNDC3B   | 64778 | ENSG00000075420 | validated |
| tarbase | hsa-miR-222-3p  | FNDC3B   | 64778 | ENSG00000075420 | validated |
| tarbase | hsa-miR-582-3p  | FNDC3B   | 64778 | ENSG00000075420 | validated |
| tarbase | hsa-miR-15b-5p  | FOSL2    | 2355  | ENSG00000075426 | validated |
| tarbase | hsa-miR-301a-3p | FOSL2    | 2355  | ENSG00000075426 | validated |
| tarbase | hsa-miR-192-5p  | FSCN1    | 6624  | ENSG00000075618 | validated |
| tarbase | hsa-miR-15b-5p  | ACTB     | 60    | ENSG00000075624 | validated |
| tarbase | hsa-miR-181a-5p | ACTB     | 60    | ENSG00000075624 | validated |
| tarbase | hsa-miR-18a-5p  | ACTB     | 60    | ENSG00000075624 | validated |
| tarbase | hsa-miR-192-5p  | ACTB     | 60    | ENSG00000075624 | validated |
| tarbase | hsa-miR-21-5p   | ACTB     | 60    | ENSG00000075624 | validated |
| tarbase | hsa-miR-144-3p  | RAB7A    | 7879  | ENSG00000075785 | validated |
| tarbase | hsa-miR-212-3p  | RAB7A    | 7879  | ENSG00000075785 | validated |
| tarbase | hsa-miR-15b-5p  | BCAP29   | 55973 | ENSG00000075790 | validated |
| tarbase | hsa-miR-181a-5p | BCAP29   | 55973 | ENSG00000075790 | validated |
| tarbase | hsa-miR-15b-5p  | KIFAP3   | 22920 | ENSG00000075945 | validated |
| tarbase | hsa-miR-192-5p  | KIFAP3   | 22920 | ENSG00000075945 | validated |
| tarbase | hsa-miR-18a-5p  | MKRN2    | 23609 | ENSG00000075975 | validated |
| tarbase | hsa-miR-21-5p   | MCM6     | 4175  | ENSG00000076003 | validated |
| tarbase | hsa-miR-212-3p  | MCM6     | 4175  | ENSG00000076003 | validated |
| tarbase | hsa-miR-106b-5p | RBM7     | 10179 | ENSG00000076053 | validated |
| tarbase | hsa-miR-15b-5p  | RBM7     | 10179 | ENSG00000076053 | validated |
| tarbase | hsa-miR-21-5p   | RBM7     | 10179 | ENSG00000076053 | validated |
| tarbase | hsa-miR-144-3p  | BAZ2A    | 11176 | ENSG00000076108 | validated |
| tarbase | hsa-miR-18a-5p  | BAZ2A    | 11176 | ENSG00000076108 | validated |
| tarbase | hsa-miR-301a-3p | BAZ2A    | 11176 | ENSG00000076108 | validated |
| tarbase | hsa-miR-582-3p  | BAZ2A    | 11176 | ENSG00000076108 | validated |
| tarbase | hsa-miR-15b-5p  | UNG      | 7374  | ENSG00000076248 | validated |
| tarbase | hsa-miR-18a-5p  | UNG      | 7374  | ENSG00000076248 | validated |
| tarbase | hsa-miR-106b-5p | UNG      | 7374  | ENSG00000076248 | validated |
| tarbase | hsa-miR-18a-5p  | KLHL20   | 27252 | ENSG00000076321 | validated |
| tarbase | hsa-miR-301a-3p | KLHL20   | 27252 | ENSG00000076321 | validated |
| tarbase | hsa-miR-15b-5p  | PLXNA2   | 5362  | ENSG00000076356 | validated |
| tarbase | hsa-miR-21-5p   | PLXNA2   | 5362  | ENSG00000076356 | validated |
| tarbase | hsa-miR-144-3p  | TPD52    | 7163  | ENSG00000076554 | validated |
| tarbase | hsa-miR-222-3p  | TPD52    | 7163  | ENSG00000076554 | validated |
| tarbase | hsa-miR-301a-3p | TPD52    | 7163  | ENSG00000076554 | validated |
| tarbase | hsa-miR-15b-5p  | TRAF4    | 9618  | ENSG00000076604 | validated |
| tarbase | hsa-miR-301a-3p | TRAF4    | 9618  | ENSG00000076604 | validated |
| tarbase | hsa-miR-582-3p  | TRAF4    | 9618  | ENSG00000076604 | validated |
| tarbase | hsa-miR-21-5p   | MCAM     | 4162  | ENSG00000076706 | validated |
| tarbase | hsa-miR-15b-5p  | GPC4     | 2239  | ENSG00000076716 | validated |
| tarbase | hsa-miR-326     | GPC4     | 2239  | ENSG00000076716 | validated |
| tarbase | hsa-miR-21-5p   | MAP2K7   | 5609  | ENSG00000076984 | validated |
| tarbase | hsa-miR-212-3p  | NMRK2    | 27231 | ENSG00000077009 | validated |
| tarbase | hsa-miR-15b-5p  | CTTNBP2  | 83992 | ENSG00000077063 | validated |
| tarbase | hsa-miR-582-5p  | RARB     | 5915  | ENSG00000077092 | validated |
| tarbase | hsa-miR-106b-5p | TM9SF3   | 56889 | ENSG00000077147 | validated |

|         |                 |          |        |                 |           |
|---------|-----------------|----------|--------|-----------------|-----------|
| tarbase | hsa-miR-192-5p  | TM9SF3   | 56889  | ENSG00000077147 | validated |
| tarbase | hsa-miR-212-3p  | TM9SF3   | 56889  | ENSG00000077147 | validated |
| tarbase | hsa-miR-582-3p  | TM9SF3   | 56889  | ENSG00000077147 | validated |
| tarbase | hsa-miR-15b-5p  | UBE2T    | 29089  | ENSG00000077152 | validated |
| tarbase | hsa-miR-21-5p   | UBE2T    | 29089  | ENSG00000077152 | validated |
| tarbase | hsa-miR-505-3p  | UBE2T    | 29089  | ENSG00000077152 | validated |
| tarbase | hsa-miR-15b-5p  | PPP1R12B | 4660   | ENSG00000077157 | validated |
| tarbase | hsa-miR-181a-5p | DNAJC10  | 54431  | ENSG00000077232 | validated |
| tarbase | hsa-miR-181a-5p | USP33    | 23032  | ENSG00000077254 | validated |
| tarbase | hsa-miR-301a-3p | USP33    | 23032  | ENSG00000077254 | validated |
| tarbase | hsa-miR-18a-5p  | SNRPA    | 6626   | ENSG00000077312 | validated |
| tarbase | hsa-miR-15b-5p  | POLD3    | 10714  | ENSG00000077514 | validated |
| tarbase | hsa-miR-15b-5p  | GPR137B  | 7107   | ENSG00000077585 | validated |
| tarbase | hsa-miR-192-5p  | GPR137B  | 7107   | ENSG00000077585 | validated |
| tarbase | hsa-miR-212-3p  | GPR137B  | 7107   | ENSG00000077585 | validated |
| tarbase | hsa-miR-21-5p   | GPR137B  | 7107   | ENSG00000077585 | validated |
| tarbase | hsa-miR-301a-3p | JADE1    | 79960  | ENSG00000077684 | validated |
| tarbase | hsa-miR-21-5p   | SLC25A43 | 203427 | ENSG00000077713 | validated |
| tarbase | hsa-miR-15b-5p  | FGFR1    | 2260   | ENSG00000077782 | validated |
| tarbase | hsa-miR-144-3p  | ITGA8    | 8516   | ENSG00000077943 | validated |
| tarbase | hsa-miR-222-3p  | ITGA8    | 8516   | ENSG00000077943 | validated |
| tarbase | hsa-miR-15b-5p  | PIAS2    | 9063   | ENSG00000078043 | validated |
| tarbase | hsa-miR-181a-5p | PIAS2    | 9063   | ENSG00000078043 | validated |
| tarbase | hsa-miR-106b-5p | LAMP3    | 27074  | ENSG00000078081 | validated |
| tarbase | hsa-miR-212-3p  | FAP      | 2191   | ENSG00000078098 | validated |
| tarbase | hsa-miR-106b-5p | NEBL     | 10529  | ENSG00000078114 | validated |
| tarbase | hsa-miR-15b-5p  | NEBL     | 10529  | ENSG00000078114 | validated |
| tarbase | hsa-miR-181a-5p | NEBL     | 10529  | ENSG00000078114 | validated |
| tarbase | hsa-miR-106b-5p | PIK3C3   | 5289   | ENSG00000078142 | validated |
| tarbase | hsa-miR-106b-5p | N4BP2    | 55728  | ENSG00000078177 | validated |
| tarbase | hsa-miR-181a-5p | N4BP2    | 55728  | ENSG00000078177 | validated |
| tarbase | hsa-miR-15b-5p  | TIGAR    | 57103  | ENSG00000078237 | validated |
| tarbase | hsa-miR-181a-5p | PPP2R5C  | 5527   | ENSG00000078304 | validated |
| tarbase | hsa-miR-212-3p  | PPP2R5C  | 5527   | ENSG00000078304 | validated |
| tarbase | hsa-miR-301a-3p | PPP2R5C  | 5527   | ENSG00000078304 | validated |
| tarbase | hsa-miR-181a-5p | RBFOX1   | 54715  | ENSG00000078328 | validated |
| tarbase | hsa-miR-181a-5p | GNB1     | 2782   | ENSG00000078369 | validated |
| tarbase | hsa-miR-301a-3p | GNB1     | 2782   | ENSG00000078369 | validated |
| tarbase | hsa-miR-212-3p  | HOXA9    | 3205   | ENSG00000078399 | validated |
| tarbase | hsa-miR-222-3p  | HOXA9    | 3205   | ENSG00000078399 | validated |
| tarbase | hsa-miR-301a-3p | HOXA9    | 3205   | ENSG00000078399 | validated |
| tarbase | hsa-miR-582-5p  | HOXA9    | 3205   | ENSG00000078399 | validated |
| tarbase | hsa-miR-181a-5p | HOXA9    | 3205   | ENSG00000078399 | validated |
| tarbase | hsa-miR-212-3p  | EDN1     | 1906   | ENSG00000078401 | validated |
| tarbase | hsa-miR-144-3p  | EDN1     | 1906   | ENSG00000078401 | validated |
| tarbase | hsa-miR-106b-5p | MLLT10   | 8028   | ENSG00000078403 | validated |
| tarbase | hsa-miR-301a-3p | MLLT10   | 8028   | ENSG00000078403 | validated |
| tarbase | hsa-miR-181a-5p | MLLT10   | 8028   | ENSG00000078403 | validated |
| tarbase | hsa-miR-15b-5p  | VDAC3    | 7419   | ENSG00000078668 | validated |
| tarbase | hsa-miR-15b-5p  | PCM1     | 5108   | ENSG00000078674 | validated |
| tarbase | hsa-miR-181a-5p | PCM1     | 5108   | ENSG00000078674 | validated |
| tarbase | hsa-miR-106b-5p | TNRC6C   | 57690  | ENSG00000078687 | validated |
| tarbase | hsa-miR-15b-5p  | TNRC6C   | 57690  | ENSG00000078687 | validated |
| tarbase | hsa-miR-181a-5p | TNRC6C   | 57690  | ENSG00000078687 | validated |
| tarbase | hsa-miR-301a-3p | TNRC6C   | 57690  | ENSG00000078687 | validated |
| tarbase | hsa-miR-18a-5p  | CBFA2T2  | 9139   | ENSG00000078699 | validated |
| tarbase | hsa-miR-181a-5p | ITCH     | 83737  | ENSG00000078747 | validated |
| tarbase | hsa-miR-212-3p  | ITCH     | 83737  | ENSG00000078747 | validated |
| tarbase | hsa-miR-582-3p  | ITCH     | 83737  | ENSG00000078747 | validated |
| tarbase | hsa-miR-106b-5p | TP53INP2 | 58476  | ENSG00000078804 | validated |
| tarbase | hsa-miR-212-3p  | TP53INP2 | 58476  | ENSG00000078804 | validated |
| tarbase | hsa-miR-106b-5p | TOLLIP   | 54472  | ENSG00000078902 | validated |
| tarbase | hsa-miR-212-3p  | RUNX1T1  | 862    | ENSG00000079102 | validated |
| tarbase | hsa-miR-106b-5p | FKBP7    | 51661  | ENSG00000079150 | validated |
| tarbase | hsa-miR-212-3p  | FKBP7    | 51661  | ENSG00000079150 | validated |
| tarbase | hsa-miR-21-5p   | OSBPL6   | 114880 | ENSG00000079156 | validated |
| tarbase | hsa-miR-144-3p  | XRCC5    | 7520   | ENSG00000079246 | validated |
| tarbase | hsa-miR-15b-5p  | XRCC5    | 7520   | ENSG00000079246 | validated |
| tarbase | hsa-miR-21-5p   | XRCC5    | 7520   | ENSG00000079246 | validated |
| tarbase | hsa-miR-21-5p   | TNS1     | 7145   | ENSG00000079308 | validated |
| tarbase | hsa-miR-15b-5p  | CDC14A   | 8556   | ENSG00000079335 | validated |

|         |                 |          |        |                 |           |
|---------|-----------------|----------|--------|-----------------|-----------|
| tarbase | hsa-miR-21-5p   | SENP1    | 29843  | ENSG00000079387 | validated |
| tarbase | hsa-miR-106b-5p | CIC      | 23152  | ENSG00000079432 | validated |
| tarbase | hsa-miR-296-5p  | CIC      | 23152  | ENSG00000079432 | validated |
| tarbase | hsa-miR-301a-3p | CIC      | 23152  | ENSG00000079432 | validated |
| tarbase | hsa-miR-181a-5p | FDFT1    | 2222   | ENSG00000079459 | validated |
| tarbase | hsa-miR-15b-5p  | KIF22    | 3835   | ENSG00000079616 | validated |
| tarbase | hsa-miR-15b-5p  | DDX1     | 1653   | ENSG00000079785 | validated |
| tarbase | hsa-miR-21-5p   | DDX1     | 1653   | ENSG00000079785 | validated |
| tarbase | hsa-miR-21-5p   | DNM2     | 1785   | ENSG00000079805 | validated |
| tarbase | hsa-miR-301a-3p | DNM2     | 1785   | ENSG00000079805 | validated |
| tarbase | hsa-miR-15b-5p  | EPB41L2  | 2037   | ENSG00000079819 | validated |
| tarbase | hsa-miR-106b-5p | MOXD1    | 26002  | ENSG00000079931 | validated |
| tarbase | hsa-miR-181a-5p | STX7     | 8417   | ENSG00000079950 | validated |
| tarbase | hsa-miR-181a-5p | SLC35C2  | 51006  | ENSG00000080189 | validated |
| tarbase | hsa-miR-106b-5p | CRYBG3   | 131544 | ENSG00000080200 | validated |
| tarbase | hsa-miR-181a-5p | CRYBG3   | 131544 | ENSG00000080200 | validated |
| tarbase | hsa-miR-212-3p  | CRYBG3   | 131544 | ENSG00000080200 | validated |
| tarbase | hsa-miR-212-3p  | EPHA6    | 285220 | ENSG00000080224 | validated |
| tarbase | hsa-miR-15b-5p  | RFX3     | 5991   | ENSG00000080298 | validated |
| tarbase | hsa-miR-106b-5p | RIF1     | 55183  | ENSG00000080345 | validated |
| tarbase | hsa-miR-181a-5p | RIF1     | 55183  | ENSG00000080345 | validated |
| tarbase | hsa-miR-505-3p  | RIF1     | 55183  | ENSG00000080345 | validated |
| tarbase | hsa-miR-192-5p  | RAB21    | 23011  | ENSG00000080371 | validated |
| tarbase | hsa-miR-582-3p  | RAB21    | 23011  | ENSG00000080371 | validated |
| tarbase | hsa-miR-106b-5p | SLC4A4   | 8671   | ENSG00000080493 | validated |
| tarbase | hsa-miR-21-5p   | SMARCA2  | 6595   | ENSG00000080503 | validated |
| tarbase | hsa-miR-15b-5p  | SESN1    | 27244  | ENSG00000080546 | validated |
| tarbase | hsa-miR-181a-5p | SESN1    | 27244  | ENSG00000080546 | validated |
| tarbase | hsa-miR-212-3p  | SESN1    | 27244  | ENSG00000080546 | validated |
| tarbase | hsa-miR-212-3p  | PIH1D3   | 139212 | ENSG00000080572 | validated |
| tarbase | hsa-miR-301a-3p | COL5A3   | 50509  | ENSG00000080573 | validated |
| tarbase | hsa-miR-15b-5p  | SRCAP    | 10847  | ENSG00000080603 | validated |
| tarbase | hsa-miR-18a-5p  | SRCAP    | 10847  | ENSG00000080603 | validated |
| tarbase | hsa-miR-296-5p  | SRCAP    | 10847  | ENSG00000080603 | validated |
| tarbase | hsa-miR-582-3p  | SRCAP    | 10847  | ENSG00000080603 | validated |
| tarbase | hsa-miR-21-5p   | PUM3     | 9933   | ENSG00000080608 | validated |
| tarbase | hsa-miR-106b-5p | KCNN2    | 3781   | ENSG00000080709 | validated |
| tarbase | hsa-miR-212-3p  | KCNN2    | 3781   | ENSG00000080709 | validated |
| tarbase | hsa-miR-15b-5p  | CNOT4    | 4850   | ENSG00000080802 | validated |
| tarbase | hsa-miR-181a-5p | CNOT4    | 4850   | ENSG00000080802 | validated |
| tarbase | hsa-miR-18a-5p  | CNOT4    | 4850   | ENSG00000080802 | validated |
| tarbase | hsa-miR-582-5p  | CNOT4    | 4850   | ENSG00000080802 | validated |
| tarbase | hsa-miR-582-5p  | CPOX     | 1371   | ENSG00000080819 | validated |
| tarbase | hsa-miR-222-3p  | CLDND1   | 56650  | ENSG00000080822 | validated |
| tarbase | hsa-miR-15b-5p  | CLDND1   | 56650  | ENSG00000080822 | validated |
| tarbase | hsa-miR-106b-5p | HSP90AA1 | 3320   | ENSG00000080824 | validated |
| tarbase | hsa-miR-15b-5p  | HSP90AA1 | 3320   | ENSG00000080824 | validated |
| tarbase | hsa-miR-181a-5p | HSP90AA1 | 3320   | ENSG00000080824 | validated |
| tarbase | hsa-miR-301a-3p | HSP90AA1 | 3320   | ENSG00000080824 | validated |
| tarbase | hsa-miR-15b-5p  | RBL1     | 5933   | ENSG00000080839 | validated |
| tarbase | hsa-miR-212-3p  | IGSF9B   | 22997  | ENSG00000080854 | validated |
| tarbase | hsa-miR-212-3p  | NDC80    | 10403  | ENSG00000080986 | validated |
| tarbase | hsa-miR-106b-5p | RSBN1    | 54665  | ENSG00000081019 | validated |
| tarbase | hsa-miR-15b-5p  | RSBN1    | 54665  | ENSG00000081019 | validated |
| tarbase | hsa-miR-192-5p  | CXCL2    | 2920   | ENSG00000081041 | validated |
| tarbase | hsa-miR-144-3p  | OSTM1    | 28962  | ENSG00000081087 | validated |
| tarbase | hsa-miR-222-3p  | OSTM1    | 28962  | ENSG00000081087 | validated |
| tarbase | hsa-miR-106b-5p | PCNP     | 57092  | ENSG00000081154 | validated |
| tarbase | hsa-miR-181a-5p | PCNP     | 57092  | ENSG00000081154 | validated |
| tarbase | hsa-miR-15b-5p  | PKP1     | 5317   | ENSG00000081277 | validated |
| tarbase | hsa-miR-582-5p  | UBA5     | 79876  | ENSG00000081307 | validated |
| tarbase | hsa-miR-15b-5p  | ZNF510   | 22869  | ENSG00000081386 | validated |
| tarbase | hsa-miR-181a-5p | ZNF510   | 22869  | ENSG00000081386 | validated |
| tarbase | hsa-miR-222-3p  | ZNF510   | 22869  | ENSG00000081386 | validated |
| tarbase | hsa-miR-181a-5p | ZNF506   | 440515 | ENSG00000081665 | validated |
| tarbase | hsa-miR-582-3p  | PHLPP1   | 23239  | ENSG00000081913 | validated |
| tarbase | hsa-miR-106b-5p | ATP8B1   | 5205   | ENSG00000081923 | validated |
| tarbase | hsa-miR-212-3p  | PGR      | 5241   | ENSG00000082175 | validated |
| tarbase | hsa-miR-18a-5p  | C5orf22  | 55322  | ENSG00000082213 | validated |
| tarbase | hsa-miR-326     | C5orf22  | 55322  | ENSG00000082213 | validated |
| tarbase | hsa-miR-106b-5p | CCNT2    | 905    | ENSG00000082258 | validated |

|         |                 |          |       |                 |           |
|---------|-----------------|----------|-------|-----------------|-----------|
| tarbase | hsa-miR-144-3p  | CCNT2    | 905   | ENSG00000082258 | validated |
| tarbase | hsa-miR-181a-5p | CCNT2    | 905   | ENSG00000082258 | validated |
| tarbase | hsa-miR-212-3p  | CCNT2    | 905   | ENSG00000082258 | validated |
| tarbase | hsa-miR-106b-5p | FAM135A  | 57579 | ENSG00000082269 | validated |
| tarbase | hsa-miR-15b-5p  | FAM135A  | 57579 | ENSG00000082269 | validated |
| tarbase | hsa-miR-181a-5p | FAM135A  | 57579 | ENSG00000082269 | validated |
| tarbase | hsa-miR-301a-3p | FAM135A  | 57579 | ENSG00000082269 | validated |
| tarbase | hsa-miR-181a-5p | EPB41L3  | 23136 | ENSG00000082397 | validated |
| tarbase | hsa-miR-106b-5p | KCNK2    | 3776  | ENSG00000082482 | validated |
| tarbase | hsa-miR-212-3p  | SERTAD4  | 56256 | ENSG00000082497 | validated |
| tarbase | hsa-miR-15b-5p  | TRAF5    | 7188  | ENSG00000082512 | validated |
| tarbase | hsa-miR-18a-5p  | TRAF5    | 7188  | ENSG00000082512 | validated |
| tarbase | hsa-miR-212-3p  | GEMIN5   | 25929 | ENSG00000082516 | validated |
| tarbase | hsa-miR-505-3p  | GEMIN5   | 25929 | ENSG00000082516 | validated |
| tarbase | hsa-miR-106b-5p | NFE2L1   | 4779  | ENSG00000082641 | validated |
| tarbase | hsa-miR-15b-5p  | NFE2L1   | 4779  | ENSG00000082641 | validated |
| tarbase | hsa-miR-181a-5p | NFE2L1   | 4779  | ENSG00000082641 | validated |
| tarbase | hsa-miR-21-5p   | NFE2L1   | 4779  | ENSG00000082641 | validated |
| tarbase | hsa-miR-18a-5p  | NFE2L1   | 4779  | ENSG00000082641 | validated |
| tarbase | hsa-miR-212-3p  | GSK3B    | 2932  | ENSG00000082701 | validated |
| tarbase | hsa-miR-582-3p  | GSK3B    | 2932  | ENSG00000082701 | validated |
| tarbase | hsa-miR-106b-5p | ERC1     | 23085 | ENSG00000082805 | validated |
| tarbase | hsa-miR-15b-5p  | XPO1     | 7514  | ENSG00000082898 | validated |
| tarbase | hsa-miR-181a-5p | XPO1     | 7514  | ENSG00000082898 | validated |
| tarbase | hsa-miR-18a-5p  | XPO1     | 7514  | ENSG00000082898 | validated |
| tarbase | hsa-miR-326     | XPO1     | 7514  | ENSG00000082898 | validated |
| tarbase | hsa-miR-212-3p  | XPO1     | 7514  | ENSG00000082898 | validated |
| tarbase | hsa-miR-301a-3p | XPO1     | 7514  | ENSG00000082898 | validated |
| tarbase | hsa-miR-21-5p   | PALB2    | 79728 | ENSG00000083093 | validated |
| tarbase | hsa-miR-212-3p  | DOP1A    | 23033 | ENSG00000083097 | validated |
| tarbase | hsa-miR-21-5p   | LYRM2    | 57226 | ENSG00000083099 | validated |
| tarbase | hsa-miR-106b-5p | KAT6A    | 7994  | ENSG00000083168 | validated |
| tarbase | hsa-miR-144-3p  | KAT6A    | 7994  | ENSG00000083168 | validated |
| tarbase | hsa-miR-181a-5p | KAT6A    | 7994  | ENSG00000083168 | validated |
| tarbase | hsa-miR-18a-5p  | KAT6A    | 7994  | ENSG00000083168 | validated |
| tarbase | hsa-miR-301a-3p | ULK2     | 9706  | ENSG00000083290 | validated |
| tarbase | hsa-miR-326     | ULK2     | 9706  | ENSG00000083290 | validated |
| tarbase | hsa-miR-15b-5p  | TNPO1    | 3842  | ENSG00000083312 | validated |
| tarbase | hsa-miR-192-5p  | TNPO1    | 3842  | ENSG00000083312 | validated |
| tarbase | hsa-miR-301a-3p | TNPO1    | 3842  | ENSG00000083312 | validated |
| tarbase | hsa-miR-582-3p  | TNPO1    | 3842  | ENSG00000083312 | validated |
| tarbase | hsa-miR-181a-5p | DIS3     | 22894 | ENSG00000083520 | validated |
| tarbase | hsa-miR-582-5p  | DIS3     | 22894 | ENSG00000083520 | validated |
| tarbase | hsa-miR-181a-5p | PIBF1    | 10464 | ENSG00000083535 | validated |
| tarbase | hsa-miR-212-3p  | PIBF1    | 10464 | ENSG00000083535 | validated |
| tarbase | hsa-miR-106b-5p | TDRD3    | 81550 | ENSG00000083544 | validated |
| tarbase | hsa-miR-15b-5p  | PDS5B    | 23047 | ENSG00000083642 | validated |
| tarbase | hsa-miR-181a-5p | PDS5B    | 23047 | ENSG00000083642 | validated |
| tarbase | hsa-miR-18a-5p  | PDS5B    | 23047 | ENSG00000083642 | validated |
| tarbase | hsa-miR-212-3p  | PDS5B    | 23047 | ENSG00000083642 | validated |
| tarbase | hsa-miR-301a-3p | CYLD     | 1540  | ENSG00000083799 | validated |
| tarbase | hsa-miR-181a-5p | CYLD     | 1540  | ENSG00000083799 | validated |
| tarbase | hsa-miR-15b-5p  | ZNF264   | 9422  | ENSG00000083844 | validated |
| tarbase | hsa-miR-181a-5p | ZNF264   | 9422  | ENSG00000083844 | validated |
| tarbase | hsa-miR-18a-5p  | ZNF264   | 9422  | ENSG00000083844 | validated |
| tarbase | hsa-miR-212-3p  | ZNF264   | 9422  | ENSG00000083844 | validated |
| tarbase | hsa-miR-301a-3p | ZNF264   | 9422  | ENSG00000083844 | validated |
| tarbase | hsa-miR-15b-5p  | FAT1     | 2195  | ENSG00000083857 | validated |
| tarbase | hsa-miR-582-3p  | FAT1     | 2195  | ENSG00000083857 | validated |
| tarbase | hsa-miR-582-5p  | FAT1     | 2195  | ENSG00000083857 | validated |
| tarbase | hsa-miR-181a-5p | YTHDC1   | 91746 | ENSG00000083896 | validated |
| tarbase | hsa-miR-106b-5p | ZMPSTE24 | 10269 | ENSG00000084073 | validated |
| tarbase | hsa-miR-15b-5p  | ZMPSTE24 | 10269 | ENSG00000084073 | validated |
| tarbase | hsa-miR-106b-5p | STARD7   | 56910 | ENSG00000084090 | validated |
| tarbase | hsa-miR-18a-5p  | STARD7   | 56910 | ENSG00000084090 | validated |
| tarbase | hsa-miR-181a-5p | STARD7   | 56910 | ENSG00000084090 | validated |
| tarbase | hsa-miR-144-3p  | REST     | 5978  | ENSG00000084093 | validated |
| tarbase | hsa-miR-15b-5p  | REST     | 5978  | ENSG00000084093 | validated |
| tarbase | hsa-miR-181a-5p | REST     | 5978  | ENSG00000084093 | validated |
| tarbase | hsa-miR-301a-3p | REST     | 5978  | ENSG00000084093 | validated |
| tarbase | hsa-miR-106b-5p | SSH1     | 54434 | ENSG00000084112 | validated |

|         |                 |          |           |                 |           |
|---------|-----------------|----------|-----------|-----------------|-----------|
| tarbase | hsa-miR-18a-5p  | SSH1     | 54434     | ENSG00000084112 | validated |
| tarbase | hsa-miR-301a-3p | SSH1     | 54434     | ENSG00000084112 | validated |
| tarbase | hsa-miR-582-5p  | SSH1     | 54434     | ENSG00000084112 | validated |
| tarbase | hsa-miR-15b-5p  | GSTP1    | 2950      | ENSG00000084207 | validated |
| tarbase | hsa-miR-15b-5p  | APLP2    | 334       | ENSG00000084234 | validated |
| tarbase | hsa-miR-181a-5p | APLP2    | 334       | ENSG00000084234 | validated |
| tarbase | hsa-miR-18a-5p  | APLP2    | 334       | ENSG00000084234 | validated |
| tarbase | hsa-miR-222-3p  | APLP2    | 334       | ENSG00000084234 | validated |
| tarbase | hsa-miR-505-3p  | APLP2    | 334       | ENSG00000084234 | validated |
| tarbase | hsa-miR-582-5p  | APLP2    | 334       | ENSG00000084234 | validated |
| tarbase | hsa-miR-15b-5p  | FAM234B  | 57613     | ENSG00000084444 | validated |
| tarbase | hsa-miR-181a-5p | FAM234B  | 57613     | ENSG00000084444 | validated |
| tarbase | hsa-miR-181a-5p | EIF3I    | 8668      | ENSG00000084623 | validated |
| tarbase | hsa-miR-21-5p   | EIF3I    | 8668      | ENSG00000084623 | validated |
| tarbase | hsa-miR-301a-3p | EIF3I    | 8668      | ENSG00000084623 | validated |
| tarbase | hsa-miR-212-3p  | COL16A1  | 1307      | ENSG00000084636 | validated |
| tarbase | hsa-miR-18a-5p  | TXLNA    | 200081    | ENSG00000084652 | validated |
| tarbase | hsa-miR-212-3p  | TXLNA    | 200081    | ENSG00000084652 | validated |
| tarbase | hsa-miR-222-3p  | TXLNA    | 200081    | ENSG00000084652 | validated |
| tarbase | hsa-miR-15b-5p  | RAB10    | 10890     | ENSG00000084733 | validated |
| tarbase | hsa-miR-15b-5p  | HADHA    | 3030      | ENSG00000084754 | validated |
| tarbase | hsa-miR-21-5p   | HADHA    | 3030      | ENSG00000084754 | validated |
| tarbase | hsa-miR-15b-5p  | MAPRE3   | 22924     | ENSG00000084764 | validated |
| tarbase | hsa-miR-15b-5p  | CAD      | 790       | ENSG00000084774 | validated |
| tarbase | hsa-miR-181a-5p | CD59     | 966       | ENSG00000085063 | validated |
| tarbase | hsa-miR-106b-5p | BCORL1   | 63035     | ENSG00000085185 | validated |
| tarbase | hsa-miR-582-3p  | ATRX     | 546       | ENSG00000085224 | validated |
| tarbase | hsa-miR-505-3p  | AK6      | 102157402 | ENSG00000085231 | validated |
| tarbase | hsa-miR-181a-5p | MYNN     | 55892     | ENSG00000085274 | validated |
| tarbase | hsa-miR-582-3p  | SCAMP1   | 9522      | ENSG00000085365 | validated |
| tarbase | hsa-miR-181a-5p | SCAMP1   | 9522      | ENSG00000085365 | validated |
| tarbase | hsa-miR-15b-5p  | PREP     | 5550      | ENSG00000085377 | validated |
| tarbase | hsa-miR-181a-5p | HACE1    | 57531     | ENSG00000085382 | validated |
| tarbase | hsa-miR-222-3p  | SEH1L    | 81929     | ENSG00000085415 | validated |
| tarbase | hsa-miR-582-5p  | SEH1L    | 81929     | ENSG00000085415 | validated |
| tarbase | hsa-miR-21-5p   | WDR47    | 22911     | ENSG00000085433 | validated |
| tarbase | hsa-miR-301a-3p | WDR47    | 22911     | ENSG00000085433 | validated |
| tarbase | hsa-miR-212-3p  | WDR47    | 22911     | ENSG00000085433 | validated |
| tarbase | hsa-miR-301a-3p | WDFY1    | 57590     | ENSG00000085449 | validated |
| tarbase | hsa-miR-212-3p  | OVGP1    | 5016      | ENSG00000085465 | validated |
| tarbase | hsa-miR-212-3p  | SLC25A24 | 29957     | ENSG00000085491 | validated |
| tarbase | hsa-miR-21-5p   | MAP3K4   | 4216      | ENSG00000085511 | validated |
| tarbase | hsa-miR-222-3p  | MAP3K4   | 4216      | ENSG00000085511 | validated |
| tarbase | hsa-miR-326     | ABCB1    | 5243      | ENSG00000085563 | validated |
| tarbase | hsa-miR-15b-5p  | ABCB1    | 5243      | ENSG00000085563 | validated |
| tarbase | hsa-miR-181a-5p | CPNE3    | 8895      | ENSG00000085719 | validated |
| tarbase | hsa-miR-21-5p   | CPNE3    | 8895      | ENSG00000085719 | validated |
| tarbase | hsa-miR-15b-5p  | RRN3     | 54700     | ENSG00000085721 | validated |
| tarbase | hsa-miR-21-5p   | RRN3     | 54700     | ENSG00000085721 | validated |
| tarbase | hsa-miR-18a-5p  | CTTN     | 2017      | ENSG00000085733 | validated |
| tarbase | hsa-miR-21-5p   | CTTN     | 2017      | ENSG00000085733 | validated |
| tarbase | hsa-miR-222-3p  | CTTN     | 2017      | ENSG00000085733 | validated |
| tarbase | hsa-miR-15b-5p  | EPS15    | 2060      | ENSG00000085832 | validated |
| tarbase | hsa-miR-301a-3p | EPS15    | 2060      | ENSG00000085832 | validated |
| tarbase | hsa-miR-296-5p  | CHERP    | 10523     | ENSG00000085872 | validated |
| tarbase | hsa-miR-301a-3p | ATG16L1  | 55054     | ENSG00000085978 | validated |
| tarbase | hsa-miR-106b-5p | MAST2    | 23139     | ENSG00000086015 | validated |
| tarbase | hsa-miR-301a-3p | DNAJA1   | 3301      | ENSG00000086061 | validated |
| tarbase | hsa-miR-326     | DNAJA1   | 3301      | ENSG00000086061 | validated |
| tarbase | hsa-miR-181a-5p | DNAJA1   | 3301      | ENSG00000086061 | validated |
| tarbase | hsa-miR-181a-5p | B4GALT1  | 2683      | ENSG00000086062 | validated |
| tarbase | hsa-miR-192-5p  | B4GALT1  | 2683      | ENSG00000086062 | validated |
| tarbase | hsa-miR-301a-3p | NFX1     | 4799      | ENSG00000086102 | validated |
| tarbase | hsa-miR-212-3p  | DIMT1    | 27292     | ENSG00000086189 | validated |
| tarbase | hsa-miR-21-5p   | IPO11    | 51194     | ENSG00000086200 | validated |
| tarbase | hsa-miR-181a-5p | EPDR1    | 54749     | ENSG00000086289 | validated |
| tarbase | hsa-miR-18a-5p  | EPDR1    | 54749     | ENSG00000086289 | validated |
| tarbase | hsa-miR-106b-5p | SEPHS1   | 22929     | ENSG00000086475 | validated |
| tarbase | hsa-miR-301a-3p | MRPL28   | 10573     | ENSG00000086504 | validated |
| tarbase | hsa-miR-15b-5p  | RBM22    | 55696     | ENSG00000086589 | validated |
| tarbase | hsa-miR-21-5p   | RBM22    | 55696     | ENSG00000086589 | validated |

|         |                 |          |        |                 |           |
|---------|-----------------|----------|--------|-----------------|-----------|
| tarbase | hsa-miR-181a-5p | RBM22    | 55696  | ENSG00000086589 | validated |
| tarbase | hsa-miR-15b-5p  | TMED2    | 10959  | ENSG00000086598 | validated |
| tarbase | hsa-miR-18a-5p  | TMED2    | 10959  | ENSG00000086598 | validated |
| tarbase | hsa-miR-181a-5p | ERO1B    | 56605  | ENSG00000086619 | validated |
| tarbase | hsa-miR-15b-5p  | ZFAND6   | 54469  | ENSG00000086666 | validated |
| tarbase | hsa-miR-222-3p  | ZFAND6   | 54469  | ENSG00000086666 | validated |
| tarbase | hsa-miR-222-3p  | TXLNG    | 55787  | ENSG00000086712 | validated |
| tarbase | hsa-miR-15b-5p  | HUWE1    | 10075  | ENSG00000086758 | validated |
| tarbase | hsa-miR-18a-5p  | HUWE1    | 10075  | ENSG00000086758 | validated |
| tarbase | hsa-miR-192-5p  | HUWE1    | 10075  | ENSG00000086758 | validated |
| tarbase | hsa-miR-212-3p  | HUWE1    | 10075  | ENSG00000086758 | validated |
| tarbase | hsa-miR-21-5p   | HUWE1    | 10075  | ENSG00000086758 | validated |
| tarbase | hsa-miR-222-3p  | HUWE1    | 10075  | ENSG00000086758 | validated |
| tarbase | hsa-miR-301a-3p | HUWE1    | 10075  | ENSG00000086758 | validated |
| tarbase | hsa-miR-15b-5p  | ZW10     | 9183   | ENSG00000086827 | validated |
| tarbase | hsa-miR-106b-5p | ALG9     | 79796  | ENSG00000086848 | validated |
| tarbase | hsa-miR-15b-5p  | ACOX3    | 8310   | ENSG00000087008 | validated |
| tarbase | hsa-miR-181a-5p | ACOX3    | 8310   | ENSG00000087008 | validated |
| tarbase | hsa-miR-15b-5p  | MTMR2    | 8898   | ENSG00000087053 | validated |
| tarbase | hsa-miR-222-3p  | PPP1R15A | 23645  | ENSG00000087074 | validated |
| tarbase | hsa-miR-212-3p  | PPP1R15A | 23645  | ENSG00000087074 | validated |
| tarbase | hsa-miR-15b-5p  | SRRT     | 51593  | ENSG00000087087 | validated |
| tarbase | hsa-miR-192-5p  | SRRT     | 51593  | ENSG00000087087 | validated |
| tarbase | hsa-miR-106b-5p | NLK      | 51701  | ENSG00000087095 | validated |
| tarbase | hsa-miR-15b-5p  | PIGS     | 94005  | ENSG00000087111 | validated |
| tarbase | hsa-miR-301a-3p | PIGS     | 94005  | ENSG00000087111 | validated |
| tarbase | hsa-miR-181a-5p | ADAMTS2  | 9509   | ENSG00000087116 | validated |
| tarbase | hsa-miR-106b-5p | ATXN7L3  | 56970  | ENSG00000087152 | validated |
| tarbase | hsa-miR-15b-5p  | ATXN7L3  | 56970  | ENSG00000087152 | validated |
| tarbase | hsa-miR-18a-5p  | ATXN7L3  | 56970  | ENSG00000087152 | validated |
| tarbase | hsa-miR-212-3p  | UIMC1    | 51720  | ENSG00000087206 | validated |
| tarbase | hsa-miR-296-5p  | MMP2     | 4313   | ENSG00000087245 | validated |
| tarbase | hsa-miR-326     | MMP2     | 4313   | ENSG00000087245 | validated |
| tarbase | hsa-miR-582-5p  | GNAO1    | 2775   | ENSG00000087258 | validated |
| tarbase | hsa-miR-21-5p   | OGFOD1   | 55239  | ENSG00000087263 | validated |
| tarbase | hsa-miR-15b-5p  | SH3BP2   | 6452   | ENSG00000087266 | validated |
| tarbase | hsa-miR-21-5p   | NOP14    | 8602   | ENSG00000087269 | validated |
| tarbase | hsa-miR-18a-5p  | ADD1     | 118    | ENSG00000087274 | validated |
| tarbase | hsa-miR-144-3p  | TXNDC16  | 57544  | ENSG00000087301 | validated |
| tarbase | hsa-miR-18a-5p  | RTRAF    | 51637  | ENSG00000087302 | validated |
| tarbase | hsa-miR-21-5p   | NID2     | 22795  | ENSG00000087303 | validated |
| tarbase | hsa-miR-21-5p   | SF3B2    | 10992  | ENSG00000087365 | validated |
| tarbase | hsa-miR-505-3p  | KLHL42   | 57542  | ENSG00000087448 | validated |
| tarbase | hsa-miR-18a-5p  | KLHL42   | 57542  | ENSG00000087448 | validated |
| tarbase | hsa-miR-192-5p  | GNAS     | 2778   | ENSG00000087460 | validated |
| tarbase | hsa-miR-15b-5p  | DNM1L    | 10059  | ENSG00000087470 | validated |
| tarbase | hsa-miR-301a-3p | DNM1L    | 10059  | ENSG00000087470 | validated |
| tarbase | hsa-miR-181a-5p | DNM1L    | 10059  | ENSG00000087470 | validated |
| tarbase | hsa-miR-181a-5p | ERGIC2   | 51290  | ENSG00000087502 | validated |
| tarbase | hsa-miR-582-3p  | AURKA    | 6790   | ENSG00000087586 | validated |
| tarbase | hsa-miR-212-3p  | AURKA    | 6790   | ENSG00000087586 | validated |
| tarbase | hsa-miR-181a-5p | METTL2A  | 339175 | ENSG00000087995 | validated |
| tarbase | hsa-miR-301a-3p | METTL2A  | 339175 | ENSG00000087995 | validated |
| tarbase | hsa-miR-582-5p  | METTL2A  | 339175 | ENSG00000087995 | validated |
| tarbase | hsa-miR-505-3p  | METTL2A  | 339175 | ENSG00000087995 | validated |
| tarbase | hsa-miR-296-5p  | CNOT3    | 4849   | ENSG00000088038 | validated |
| tarbase | hsa-miR-15b-5p  | PTPN4    | 5775   | ENSG00000088179 | validated |
| tarbase | hsa-miR-181a-5p | PTPN4    | 5775   | ENSG00000088179 | validated |
| tarbase | hsa-miR-21-5p   | PTPN4    | 5775   | ENSG00000088179 | validated |
| tarbase | hsa-miR-326     | DDX18    | 8886   | ENSG00000088205 | validated |
| tarbase | hsa-miR-106b-5p | KHSRP    | 8570   | ENSG00000088247 | validated |
| tarbase | hsa-miR-181a-5p | KHSRP    | 8570   | ENSG00000088247 | validated |
| tarbase | hsa-miR-296-5p  | KHSRP    | 8570   | ENSG00000088247 | validated |
| tarbase | hsa-miR-21-5p   | TPX2     | 22974  | ENSG00000088325 | validated |
| tarbase | hsa-miR-301a-3p | TPX2     | 22974  | ENSG00000088325 | validated |
| tarbase | hsa-miR-106b-5p | TPX2     | 22974  | ENSG00000088325 | validated |
| tarbase | hsa-miR-21-5p   | DOCK9    | 23348  | ENSG00000088387 | validated |
| tarbase | hsa-miR-326     | DOCK9    | 23348  | ENSG00000088387 | validated |
| tarbase | hsa-miR-181a-5p | ANKRD10  | 55608  | ENSG00000088448 | validated |
| tarbase | hsa-miR-21-5p   | DOCK3    | 1795   | ENSG00000088538 | validated |
| tarbase | hsa-miR-296-5p  | CRLS1    | 54675  | ENSG00000088766 | validated |



|         |                 |          |       |                 |           |
|---------|-----------------|----------|-------|-----------------|-----------|
| tarbase | hsa-miR-301a-3p | CRLS1    | 54675 | ENSG00000088766 | validated |
| tarbase | hsa-miR-181a-5p | ATRN     | 8455  | ENSG00000088812 | validated |
| tarbase | hsa-miR-15b-5p  | MAVS     | 57506 | ENSG00000088888 | validated |
| tarbase | hsa-miR-21-5p   | MAVS     | 57506 | ENSG00000088888 | validated |
| tarbase | hsa-miR-326     | RPL6     | 6128  | ENSG00000089009 | validated |
| tarbase | hsa-miR-222-3p  | ESF1     | 51575 | ENSG00000089048 | validated |
| tarbase | hsa-miR-301a-3p | ESF1     | 51575 | ENSG00000089048 | validated |
| tarbase | hsa-miR-21-5p   | ANAPC5   | 51433 | ENSG00000089053 | validated |
| tarbase | hsa-miR-326     | SLC23A2  | 9962  | ENSG00000089057 | validated |
| tarbase | hsa-miR-505-3p  | KDM2B    | 84678 | ENSG00000089094 | validated |
| tarbase | hsa-miR-212-3p  | OAS1     | 4938  | ENSG00000089127 | validated |
| tarbase | hsa-miR-144-3p  | GCN1     | 10985 | ENSG00000089154 | validated |
| tarbase | hsa-miR-21-5p   | GCN1     | 10985 | ENSG00000089154 | validated |
| tarbase | hsa-miR-326     | GCN1     | 10985 | ENSG00000089154 | validated |
| tarbase | hsa-miR-181a-5p | RPLP0    | 6175  | ENSG00000089157 | validated |
| tarbase | hsa-miR-15b-5p  | PXN      | 5829  | ENSG00000089159 | validated |
| tarbase | hsa-miR-212-3p  | SIRT4    | 23409 | ENSG00000089163 | validated |
| tarbase | hsa-miR-15b-5p  | KIF16B   | 55614 | ENSG00000089177 | validated |
| tarbase | hsa-miR-301a-3p | KIF16B   | 55614 | ENSG00000089177 | validated |
| tarbase | hsa-miR-212-3p  | CHGB     | 1114  | ENSG00000089199 | validated |
| tarbase | hsa-miR-21-5p   | PEBP1    | 5037  | ENSG00000089220 | validated |
| tarbase | hsa-miR-181a-5p | FUS      | 2521  | ENSG00000089280 | validated |
| tarbase | hsa-miR-21-5p   | FUS      | 2521  | ENSG00000089280 | validated |
| tarbase | hsa-miR-326     | FUS      | 2521  | ENSG00000089280 | validated |
| tarbase | hsa-miR-582-5p  | FUS      | 2521  | ENSG00000089280 | validated |
| tarbase | hsa-miR-212-3p  | FUS      | 2521  | ENSG00000089280 | validated |
| tarbase | hsa-miR-212-3p  | FXYD5    | 53827 | ENSG00000089327 | validated |
| tarbase | hsa-miR-181a-5p | ZNF302   | 55900 | ENSG00000089335 | validated |
| tarbase | hsa-miR-296-5p  | GRAMD1A  | 57655 | ENSG00000089351 | validated |
| tarbase | hsa-miR-18a-5p  | KCNH4    | 23415 | ENSG00000089558 | validated |
| tarbase | hsa-miR-582-5p  | GANAB    | 23193 | ENSG00000089597 | validated |
| tarbase | hsa-miR-15b-5p  | BIRC5    | 332   | ENSG00000089685 | validated |
| tarbase | hsa-miR-181a-5p | BIRC5    | 332   | ENSG00000089685 | validated |
| tarbase | hsa-miR-21-5p   | BIRC5    | 332   | ENSG00000089685 | validated |
| tarbase | hsa-miR-326     | BIRC5    | 332   | ENSG00000089685 | validated |
| tarbase | hsa-miR-192-5p  | DDX24    | 57062 | ENSG00000089737 | validated |
| tarbase | hsa-miR-181a-5p | NECAP1   | 25977 | ENSG00000089818 | validated |
| tarbase | hsa-miR-15b-5p  | NECAP1   | 25977 | ENSG00000089818 | validated |
| tarbase | hsa-miR-18a-5p  | RCOR1    | 23186 | ENSG00000089902 | validated |
| tarbase | hsa-miR-21-5p   | RCOR1    | 23186 | ENSG00000089902 | validated |
| tarbase | hsa-miR-505-3p  | RCOR1    | 23186 | ENSG00000089902 | validated |
| tarbase | hsa-miR-106b-5p | GPATCH2L | 55668 | ENSG00000089916 | validated |
| tarbase | hsa-miR-212-3p  | GPATCH2L | 55668 | ENSG00000089916 | validated |
| tarbase | hsa-miR-326     | GPATCH2L | 55668 | ENSG00000089916 | validated |
| tarbase | hsa-miR-15b-5p  | BLVRB    | 645   | ENSG00000090013 | validated |
| tarbase | hsa-miR-21-5p   | BLVRB    | 645   | ENSG00000090013 | validated |
| tarbase | hsa-miR-106b-5p | PAPOLA   | 10914 | ENSG00000090060 | validated |
| tarbase | hsa-miR-21-5p   | PAPOLA   | 10914 | ENSG00000090060 | validated |
| tarbase | hsa-miR-21-5p   | RGS1     | 5996  | ENSG00000090104 | validated |
| tarbase | hsa-miR-106b-5p | STRN4    | 29888 | ENSG00000090372 | validated |
| tarbase | hsa-miR-296-5p  | STRN4    | 29888 | ENSG00000090372 | validated |
| tarbase | hsa-miR-181a-5p | SPG21    | 51324 | ENSG00000090487 | validated |
| tarbase | hsa-miR-106b-5p | DNAJB11  | 51726 | ENSG00000090520 | validated |
| tarbase | hsa-miR-15b-5p  | P3H2     | 55214 | ENSG00000090530 | validated |
| tarbase | hsa-miR-106b-5p | GOLGA3   | 2802  | ENSG00000090615 | validated |
| tarbase | hsa-miR-15b-5p  | GOLGA3   | 2802  | ENSG00000090615 | validated |
| tarbase | hsa-miR-21-5p   | GOLGA3   | 2802  | ENSG00000090615 | validated |
| tarbase | hsa-miR-106b-5p | PABPC4   | 8761  | ENSG00000090621 | validated |
| tarbase | hsa-miR-15b-5p  | PABPC4   | 8761  | ENSG00000090621 | validated |
| tarbase | hsa-miR-582-3p  | PABPC4   | 8761  | ENSG00000090621 | validated |
| tarbase | hsa-miR-106b-5p | PDPR     | 55066 | ENSG00000090857 | validated |
| tarbase | hsa-miR-18a-5p  | PDPR     | 55066 | ENSG00000090857 | validated |
| tarbase | hsa-miR-582-5p  | GLG1     | 2734  | ENSG00000090863 | validated |
| tarbase | hsa-miR-15b-5p  | GLG1     | 2734  | ENSG00000090863 | validated |
| tarbase | hsa-miR-144-3p  | TNRC6A   | 27327 | ENSG00000090905 | validated |
| tarbase | hsa-miR-15b-5p  | TNRC6A   | 27327 | ENSG00000090905 | validated |
| tarbase | hsa-miR-181a-5p | TNRC6A   | 27327 | ENSG00000090905 | validated |
| tarbase | hsa-miR-18a-5p  | TNRC6A   | 27327 | ENSG00000090905 | validated |
| tarbase | hsa-miR-212-3p  | TNRC6A   | 27327 | ENSG00000090905 | validated |
| tarbase | hsa-miR-21-5p   | TNRC6A   | 27327 | ENSG00000090905 | validated |
| tarbase | hsa-miR-582-3p  | TNRC6A   | 27327 | ENSG00000090905 | validated |

|         |                 |         |        |                 |           |
|---------|-----------------|---------|--------|-----------------|-----------|
| tarbase | hsa-miR-18a-5p  | PLEKHG2 | 64857  | ENSG00000090924 | validated |
| tarbase | hsa-miR-15b-5p  | PITPNM2 | 57605  | ENSG00000090975 | validated |
| tarbase | hsa-miR-106b-5p | EXOC1   | 55763  | ENSG00000090989 | validated |
| tarbase | hsa-miR-181a-5p | RBM27   | 54439  | ENSG00000091009 | validated |
| tarbase | hsa-miR-192-5p  | RBM27   | 54439  | ENSG00000091009 | validated |
| tarbase | hsa-miR-21-5p   | RBM27   | 54439  | ENSG00000091009 | validated |
| tarbase | hsa-miR-106b-5p | OSBPL8  | 114882 | ENSG00000091039 | validated |
| tarbase | hsa-miR-181a-5p | OSBPL8  | 114882 | ENSG00000091039 | validated |
| tarbase | hsa-miR-222-3p  | OSBPL8  | 114882 | ENSG00000091039 | validated |
| tarbase | hsa-miR-21-5p   | PUS7    | 54517  | ENSG00000091127 | validated |
| tarbase | hsa-miR-212-3p  | NRCAM   | 4897   | ENSG00000091129 | validated |
| tarbase | hsa-miR-181a-5p | NRCAM   | 4897   | ENSG00000091129 | validated |
| tarbase | hsa-miR-21-5p   | LAMB1   | 3912   | ENSG00000091136 | validated |
| tarbase | hsa-miR-15b-5p  | DLD     | 1738   | ENSG00000091140 | validated |
| tarbase | hsa-miR-181a-5p | WDR7    | 23335  | ENSG00000091157 | validated |
| tarbase | hsa-miR-212-3p  | TXNL1   | 9352   | ENSG00000091164 | validated |
| tarbase | hsa-miR-21-5p   | TXNL1   | 9352   | ENSG00000091164 | validated |
| tarbase | hsa-miR-181a-5p | TXNL1   | 9352   | ENSG00000091164 | validated |
| tarbase | hsa-miR-21-5p   | CMTM6   | 54918  | ENSG00000091317 | validated |
| tarbase | hsa-miR-106b-5p | CMTM6   | 54918  | ENSG00000091317 | validated |
| tarbase | hsa-miR-144-3p  | ITGA6   | 3655   | ENSG00000091409 | validated |
| tarbase | hsa-miR-106b-5p | ITGA6   | 3655   | ENSG00000091409 | validated |
| tarbase | hsa-miR-181a-5p | RAPGEF4 | 11069  | ENSG00000091428 | validated |
| tarbase | hsa-miR-181a-5p | MAP3K20 | 51776  | ENSG00000091436 | validated |
| tarbase | hsa-miR-301a-3p | MAP3K20 | 51776  | ENSG00000091436 | validated |
| tarbase | hsa-miR-181a-5p | FH      | 2271   | ENSG00000091483 | validated |
| tarbase | hsa-miR-301a-3p | SEL1L3  | 23231  | ENSG00000091490 | validated |
| tarbase | hsa-miR-106b-5p | CDV3    | 55573  | ENSG00000091527 | validated |
| tarbase | hsa-miR-181a-5p | CDV3    | 55573  | ENSG00000091527 | validated |
| tarbase | hsa-miR-212-3p  | CDV3    | 55573  | ENSG00000091527 | validated |
| tarbase | hsa-miR-222-3p  | CDV3    | 55573  | ENSG00000091527 | validated |
| tarbase | hsa-miR-301a-3p | CDV3    | 55573  | ENSG00000091527 | validated |
| tarbase | hsa-miR-18a-5p  | CDV3    | 55573  | ENSG00000091527 | validated |
| tarbase | hsa-miR-15b-5p  | NLRP1   | 22861  | ENSG00000091592 | validated |
| tarbase | hsa-miR-181a-5p | ORC6    | 23594  | ENSG00000091651 | validated |
| tarbase | hsa-miR-301a-3p | ORC6    | 23594  | ENSG00000091651 | validated |
| tarbase | hsa-miR-106b-5p | ZFHx4   | 79776  | ENSG00000091656 | validated |
| tarbase | hsa-miR-181a-5p | ZFHx4   | 79776  | ENSG00000091656 | validated |
| tarbase | hsa-miR-15b-5p  | ZC3HC1  | 51530  | ENSG00000091732 | validated |
| tarbase | hsa-miR-21-5p   | ESR1    | 2099   | ENSG00000091831 | validated |
| tarbase | hsa-miR-181a-5p | ANGPT2  | 285    | ENSG00000091879 | validated |
| tarbase | hsa-miR-212-3p  | PSME1   | 5720   | ENSG00000092010 | validated |
| tarbase | hsa-miR-582-5p  | PPP2R3C | 55012  | ENSG00000092020 | validated |
| tarbase | hsa-miR-582-5p  | SLC7A8  | 23428  | ENSG00000092068 | validated |
| tarbase | hsa-miR-15b-5p  | SCFD1   | 23256  | ENSG00000092108 | validated |
| tarbase | hsa-miR-18a-5p  | SCFD1   | 23256  | ENSG00000092108 | validated |
| tarbase | hsa-miR-212-3p  | G2E3    | 55632  | ENSG00000092140 | validated |
| tarbase | hsa-miR-222-3p  | G2E3    | 55632  | ENSG00000092140 | validated |
| tarbase | hsa-miR-15b-5p  | HECTD1  | 25831  | ENSG00000092148 | validated |
| tarbase | hsa-miR-181a-5p | HECTD1  | 25831  | ENSG00000092148 | validated |
| tarbase | hsa-miR-212-3p  | HECTD1  | 25831  | ENSG00000092148 | validated |
| tarbase | hsa-miR-222-3p  | HECTD1  | 25831  | ENSG00000092148 | validated |
| tarbase | hsa-miR-301a-3p | HECTD1  | 25831  | ENSG00000092148 | validated |
| tarbase | hsa-miR-106b-5p | SUPT16H | 11198  | ENSG00000092201 | validated |
| tarbase | hsa-miR-18a-5p  | SUPT16H | 11198  | ENSG00000092201 | validated |
| tarbase | hsa-miR-222-3p  | SUPT16H | 11198  | ENSG00000092201 | validated |
| tarbase | hsa-miR-301a-3p | SUPT16H | 11198  | ENSG00000092201 | validated |
| tarbase | hsa-miR-15b-5p  | TOX4    | 9878   | ENSG00000092203 | validated |
| tarbase | hsa-miR-181a-5p | TRPM7   | 54822  | ENSG00000092439 | validated |
| tarbase | hsa-miR-192-5p  | TRPM7   | 54822  | ENSG00000092439 | validated |
| tarbase | hsa-miR-106b-5p | SNAP23  | 8773   | ENSG00000092531 | validated |
| tarbase | hsa-miR-222-3p  | SNAP23  | 8773   | ENSG00000092531 | validated |
| tarbase | hsa-miR-301a-3p | PHGDH   | 26227  | ENSG00000092621 | validated |
| tarbase | hsa-miR-21-5p   | EZR     | 7430   | ENSG00000092820 | validated |
| tarbase | hsa-miR-582-3p  | EZR     | 7430   | ENSG00000092820 | validated |
| tarbase | hsa-miR-296-5p  | MYL6    | 4637   | ENSG00000092841 | validated |
| tarbase | hsa-miR-15b-5p  | AGO1    | 26523  | ENSG00000092847 | validated |
| tarbase | hsa-miR-181a-5p | AGO1    | 26523  | ENSG00000092847 | validated |
| tarbase | hsa-miR-21-5p   | AGO1    | 26523  | ENSG00000092847 | validated |
| tarbase | hsa-miR-301a-3p | AGO1    | 26523  | ENSG00000092847 | validated |
| tarbase | hsa-miR-582-3p  | AGO1    | 26523  | ENSG00000092847 | validated |

|         |                 |          |        |                 |           |
|---------|-----------------|----------|--------|-----------------|-----------|
| tarbase | hsa-miR-21-5p   | CLSPN    | 63967  | ENSG00000092853 | validated |
| tarbase | hsa-miR-181a-5p | RFFL     | 117584 | ENSG00000092871 | validated |
| tarbase | hsa-miR-301a-3p | MFSD11   | 79157  | ENSG00000092931 | validated |
| tarbase | hsa-miR-21-5p   | DPYSL2   | 1808   | ENSG00000092964 | validated |
| tarbase | hsa-miR-222-3p  | DPYSL2   | 1808   | ENSG00000092964 | validated |
| tarbase | hsa-miR-181a-5p | DPYSL2   | 1808   | ENSG00000092964 | validated |
| tarbase | hsa-miR-106b-5p | GPATCH2  | 55105  | ENSG00000092978 | validated |
| tarbase | hsa-miR-15b-5p  | GPATCH2  | 55105  | ENSG00000092978 | validated |
| tarbase | hsa-miR-21-5p   | GPATCH2  | 55105  | ENSG00000092978 | validated |
| tarbase | hsa-miR-582-5p  | GPATCH2  | 55105  | ENSG00000092978 | validated |
| tarbase | hsa-miR-181a-5p | NUP50    | 10762  | ENSG00000093000 | validated |
| tarbase | hsa-miR-18a-5p  | NUP50    | 10762  | ENSG00000093000 | validated |
| tarbase | hsa-miR-106b-5p | CDC45    | 8318   | ENSG00000093009 | validated |
| tarbase | hsa-miR-15b-5p  | COMT     | 1312   | ENSG00000093010 | validated |
| tarbase | hsa-miR-106b-5p | ECHDC1   | 55862  | ENSG00000093144 | validated |
| tarbase | hsa-miR-15b-5p  | ECHDC1   | 55862  | ENSG00000093144 | validated |
| tarbase | hsa-miR-15b-5p  | SEC22C   | 9117   | ENSG00000093183 | validated |
| tarbase | hsa-miR-18a-5p  | SEC22C   | 9117   | ENSG00000093183 | validated |
| tarbase | hsa-miR-582-3p  | SEC22C   | 9117   | ENSG00000093183 | validated |
| tarbase | hsa-miR-106b-5p | CDC6     | 990    | ENSG00000094804 | validated |
| tarbase | hsa-miR-144-3p  | CBX5     | 23468  | ENSG00000094916 | validated |
| tarbase | hsa-miR-15b-5p  | CBX5     | 23468  | ENSG00000094916 | validated |
| tarbase | hsa-miR-181a-5p | CBX5     | 23468  | ENSG00000094916 | validated |
| tarbase | hsa-miR-21-5p   | CBX5     | 23468  | ENSG00000094916 | validated |
| tarbase | hsa-miR-582-5p  | CBX5     | 23468  | ENSG00000094916 | validated |
| tarbase | hsa-miR-15b-5p  | SUCO     | 51430  | ENSG00000094975 | validated |
| tarbase | hsa-miR-181a-5p | SUCO     | 51430  | ENSG00000094975 | validated |
| tarbase | hsa-miR-582-5p  | SUCO     | 51430  | ENSG00000094975 | validated |
| tarbase | hsa-miR-181a-5p | MSH2     | 4436   | ENSG00000095002 | validated |
| tarbase | hsa-miR-212-3p  | MSH2     | 4436   | ENSG00000095002 | validated |
| tarbase | hsa-miR-18a-5p  | MAP3K1   | 4214   | ENSG00000095015 | validated |
| tarbase | hsa-miR-582-3p  | MAP3K1   | 4214   | ENSG00000095015 | validated |
| tarbase | hsa-miR-181a-5p | ARCN1    | 372    | ENSG00000095139 | validated |
| tarbase | hsa-miR-21-5p   | ARCN1    | 372    | ENSG00000095139 | validated |
| tarbase | hsa-miR-582-5p  | ARCN1    | 372    | ENSG00000095139 | validated |
| tarbase | hsa-miR-15b-5p  | PSMD5    | 5711   | ENSG00000095261 | validated |
| tarbase | hsa-miR-181a-5p | NUP188   | 23511  | ENSG00000095319 | validated |
| tarbase | hsa-miR-326     | CRAT     | 1384   | ENSG00000095321 | validated |
| tarbase | hsa-miR-181a-5p | NANS     | 54187  | ENSG00000095380 | validated |
| tarbase | hsa-miR-301a-3p | TBC1D2   | 55357  | ENSG00000095383 | validated |
| tarbase | hsa-miR-106b-5p | SEMA4G   | 57715  | ENSG00000095539 | validated |
| tarbase | hsa-miR-144-3p  | BTAF1    | 9044   | ENSG00000095564 | validated |
| tarbase | hsa-miR-582-3p  | BTAF1    | 9044   | ENSG00000095564 | validated |
| tarbase | hsa-miR-106b-5p | IKZF5    | 64376  | ENSG00000095574 | validated |
| tarbase | hsa-miR-18a-5p  | IKZF5    | 64376  | ENSG00000095574 | validated |
| tarbase | hsa-miR-106b-5p | BLNK     | 29760  | ENSG00000095585 | validated |
| tarbase | hsa-miR-21-5p   | TDRD1    | 56165  | ENSG00000095627 | validated |
| tarbase | hsa-miR-21-5p   | BAMBI    | 25805  | ENSG00000095739 | validated |
| tarbase | hsa-miR-301a-3p | BAMBI    | 25805  | ENSG00000095739 | validated |
| tarbase | hsa-miR-181a-5p | WAC      | 51322  | ENSG00000095787 | validated |
| tarbase | hsa-miR-301a-3p | WAC      | 51322  | ENSG00000095787 | validated |
| tarbase | hsa-miR-18a-5p  | HIVEP1   | 3096   | ENSG00000095951 | validated |
| tarbase | hsa-miR-192-5p  | HIVEP1   | 3096   | ENSG00000095951 | validated |
| tarbase | hsa-miR-106b-5p | FKBP5    | 2289   | ENSG00000096060 | validated |
| tarbase | hsa-miR-106b-5p | SRPK1    | 6732   | ENSG00000096063 | validated |
| tarbase | hsa-miR-21-5p   | SRPK1    | 6732   | ENSG00000096063 | validated |
| tarbase | hsa-miR-301a-3p | SRPK1    | 6732   | ENSG00000096063 | validated |
| tarbase | hsa-miR-18a-5p  | BRPF3    | 27154  | ENSG00000096070 | validated |
| tarbase | hsa-miR-212-3p  | BRPF3    | 27154  | ENSG00000096070 | validated |
| tarbase | hsa-miR-192-5p  |          |        | ENSG00000096153 | validated |
| tarbase | hsa-miR-21-5p   | HSP90AB1 | 3326   | ENSG00000096384 | validated |
| tarbase | hsa-miR-106b-5p | CDC5L    | 988    | ENSG00000096401 | validated |
| tarbase | hsa-miR-181a-5p | CDC5L    | 988    | ENSG00000096401 | validated |
| tarbase | hsa-miR-301a-3p | CDC5L    | 988    | ENSG00000096401 | validated |
| tarbase | hsa-miR-212-3p  | ZNF184   | 7738   | ENSG00000096654 | validated |
| tarbase | hsa-miR-106b-5p | DSP      | 1832   | ENSG00000096696 | validated |
| tarbase | hsa-miR-192-5p  | DSP      | 1832   | ENSG00000096696 | validated |
| tarbase | hsa-miR-21-5p   | DSP      | 1832   | ENSG00000096696 | validated |
| tarbase | hsa-miR-181a-5p | HNRNPH3  | 3189   | ENSG00000096746 | validated |
| tarbase | hsa-miR-301a-3p | ABL1     | 25     | ENSG00000097007 | validated |
| tarbase | hsa-miR-21-5p   | ACOT7    | 11332  | ENSG00000097021 | validated |

|         |                 |         |        |                 |           |
|---------|-----------------|---------|--------|-----------------|-----------|
| tarbase | hsa-miR-181a-5p | SH3GLB1 | 51100  | ENSG00000097033 | validated |
| tarbase | hsa-miR-15b-5p  | CDC7    | 8317   | ENSG00000097046 | validated |
| tarbase | hsa-miR-212-3p  | PCSK5   | 5125   | ENSG00000099139 | validated |
| tarbase | hsa-miR-21-5p   | SCD     | 6319   | ENSG00000099194 | validated |
| tarbase | hsa-miR-222-3p  | SCD     | 6319   | ENSG00000099194 | validated |
| tarbase | hsa-miR-582-5p  | SCD     | 6319   | ENSG00000099194 | validated |
| tarbase | hsa-miR-15b-5p  | ERMP1   | 79956  | ENSG00000099219 | validated |
| tarbase | hsa-miR-301a-3p | ERMP1   | 79956  | ENSG00000099219 | validated |
| tarbase | hsa-miR-106b-5p | RAB18   | 22931  | ENSG00000099246 | validated |
| tarbase | hsa-miR-15b-5p  | RAB18   | 22931  | ENSG00000099246 | validated |
| tarbase | hsa-miR-18a-5p  | RAB18   | 22931  | ENSG00000099246 | validated |
| tarbase | hsa-miR-181a-5p | RAB18   | 22931  | ENSG00000099246 | validated |
| tarbase | hsa-miR-222-3p  | NRP1    | 8829   | ENSG00000099250 | validated |
| tarbase | hsa-miR-301a-3p | NRP1    | 8829   | ENSG00000099250 | validated |
| tarbase | hsa-miR-326     | NRP1    | 8829   | ENSG00000099250 | validated |
| tarbase | hsa-miR-181a-5p | PSMD8   | 5714   | ENSG00000099341 | validated |
| tarbase | hsa-miR-15b-5p  | FBXL19  | 54620  | ENSG00000099364 | validated |
| tarbase | hsa-miR-296-5p  | FBXL19  | 54620  | ENSG00000099364 | validated |
| tarbase | hsa-miR-326     | FBXL19  | 54620  | ENSG00000099364 | validated |
| tarbase | hsa-miR-296-5p  | SETD1A  | 9739   | ENSG00000099381 | validated |
| tarbase | hsa-miR-582-3p  | SETD1A  | 9739   | ENSG00000099381 | validated |
| tarbase | hsa-miR-18a-5p  | MAGEB2  | 4113   | ENSG00000099399 | validated |
| tarbase | hsa-miR-15b-5p  | CIRBP   | 1153   | ENSG00000099622 | validated |
| tarbase | hsa-miR-212-3p  | HNRNPM  | 4670   | ENSG00000099783 | validated |
| tarbase | hsa-miR-296-5p  | HNRNPM  | 4670   | ENSG00000099783 | validated |
| tarbase | hsa-miR-301a-3p | HNRNPM  | 4670   | ENSG00000099783 | validated |
| tarbase | hsa-miR-505-3p  | HNRNPM  | 4670   | ENSG00000099783 | validated |
| tarbase | hsa-miR-296-5p  | TIMM13  | 26517  | ENSG00000099800 | validated |
| tarbase | hsa-miR-192-5p  | MTAP    | 4507   | ENSG00000099810 | validated |
| tarbase | hsa-miR-192-5p  | CEP170B | 283638 | ENSG00000099814 | validated |
| tarbase | hsa-miR-212-3p  | CEP170B | 283638 | ENSG00000099814 | validated |
| tarbase | hsa-miR-326     | POLR2E  | 5434   | ENSG00000099817 | validated |
| tarbase | hsa-miR-301a-3p | GADD45B | 4616   | ENSG00000099860 | validated |
| tarbase | hsa-miR-212-3p  | MADCAM1 | 8174   | ENSG00000099866 | validated |
| tarbase | hsa-miR-144-3p  | MKNK2   | 2872   | ENSG00000099875 | validated |
| tarbase | hsa-miR-181a-5p | MKNK2   | 2872   | ENSG00000099875 | validated |
| tarbase | hsa-miR-192-5p  | MKNK2   | 2872   | ENSG00000099875 | validated |
| tarbase | hsa-miR-301a-3p | MED15   | 51586  | ENSG00000099917 | validated |
| tarbase | hsa-miR-21-5p   | SNAP29  | 9342   | ENSG00000099940 | validated |
| tarbase | hsa-miR-181a-5p | CRKL    | 1399   | ENSG00000099942 | validated |
| tarbase | hsa-miR-212-3p  | CRKL    | 1399   | ENSG00000099942 | validated |
| tarbase | hsa-miR-21-5p   | CRKL    | 1399   | ENSG00000099942 | validated |
| tarbase | hsa-miR-505-3p  | CABIN1  | 23523  | ENSG00000099991 | validated |
| tarbase | hsa-miR-212-3p  | SEC14L2 | 23541  | ENSG00000100003 | validated |
| tarbase | hsa-miR-106b-5p | SPECC1L | 23384  | ENSG00000100014 | validated |
| tarbase | hsa-miR-181a-5p | SPECC1L | 23384  | ENSG00000100014 | validated |
| tarbase | hsa-miR-106b-5p | PPIL2   | 23759  | ENSG00000100023 | validated |
| tarbase | hsa-miR-326     | PPIL2   | 23759  | ENSG00000100023 | validated |
| tarbase | hsa-miR-106b-5p | YPEL1   | 29799  | ENSG00000100027 | validated |
| tarbase | hsa-miR-106b-5p | SNRPD3  | 6634   | ENSG00000100028 | validated |
| tarbase | hsa-miR-15b-5p  | SNRPD3  | 6634   | ENSG00000100028 | validated |
| tarbase | hsa-miR-18a-5p  | PES1    | 23481  | ENSG00000100029 | validated |
| tarbase | hsa-miR-582-3p  | PES1    | 23481  | ENSG00000100029 | validated |
| tarbase | hsa-miR-212-3p  | MAPK1   | 5594   | ENSG00000100030 | validated |
| tarbase | hsa-miR-21-5p   | MAPK1   | 5594   | ENSG00000100030 | validated |
| tarbase | hsa-miR-582-5p  | MAPK1   | 5594   | ENSG00000100030 | validated |
| tarbase | hsa-miR-21-5p   | PPM1F   | 9647   | ENSG00000100034 | validated |
| tarbase | hsa-miR-326     | PPM1F   | 9647   | ENSG00000100034 | validated |
| tarbase | hsa-miR-106b-5p | ESS2    | 8220   | ENSG00000100056 | validated |
| tarbase | hsa-miR-181a-5p | CARD10  | 29775  | ENSG00000100065 | validated |
| tarbase | hsa-miR-212-3p  | LRP5L   | 91355  | ENSG00000100068 | validated |
| tarbase | hsa-miR-15b-5p  | SLC25A1 | 6576   | ENSG00000100075 | validated |
| tarbase | hsa-miR-212-3p  | HIRA    | 7290   | ENSG00000100084 | validated |
| tarbase | hsa-miR-181a-5p | PATZ1   | 23598  | ENSG00000100105 | validated |
| tarbase | hsa-miR-18a-5p  | TRIOBP  | 11078  | ENSG00000100106 | validated |
| tarbase | hsa-miR-181a-5p | EIF3L   | 51386  | ENSG00000100129 | validated |
| tarbase | hsa-miR-21-5p   | EIF3L   | 51386  | ENSG00000100129 | validated |
| tarbase | hsa-miR-301a-3p | EIF3L   | 51386  | ENSG00000100129 | validated |
| tarbase | hsa-miR-21-5p   | SNU13   | 4809   | ENSG00000100138 | validated |
| tarbase | hsa-miR-106b-5p | POLR2F  | 5435   | ENSG00000100142 | validated |
| tarbase | hsa-miR-106b-5p | SEPTIN3 | 55964  | ENSG00000100167 | validated |

|         |                 |         |        |                 |           |
|---------|-----------------|---------|--------|-----------------|-----------|
| tarbase | hsa-miR-15b-5p  | SEPTIN3 | 55964  | ENSG00000100167 | validated |
| tarbase | hsa-miR-181a-5p | DDX17   | 10521  | ENSG00000100201 | validated |
| tarbase | hsa-miR-21-5p   | DDX17   | 10521  | ENSG00000100201 | validated |
| tarbase | hsa-miR-301a-3p | DDX17   | 10521  | ENSG00000100201 | validated |
| tarbase | hsa-miR-505-3p  | DDX17   | 10521  | ENSG00000100201 | validated |
| tarbase | hsa-miR-15b-5p  | DDX17   | 10521  | ENSG00000100201 | validated |
| tarbase | hsa-miR-15b-5p  | TCF20   | 6942   | ENSG00000100207 | validated |
| tarbase | hsa-miR-106b-5p | CBY1    | 25776  | ENSG00000100211 | validated |
| tarbase | hsa-miR-326     | CBY1    | 25776  | ENSG00000100211 | validated |
| tarbase | hsa-miR-192-5p  | TOMM22  | 56993  | ENSG00000100216 | validated |
| tarbase | hsa-miR-222-3p  | XBP1    | 7494   | ENSG00000100219 | validated |
| tarbase | hsa-miR-326     | XBP1    | 7494   | ENSG00000100219 | validated |
| tarbase | hsa-miR-15b-5p  | RTCB    | 51493  | ENSG00000100220 | validated |
| tarbase | hsa-miR-106b-5p | JOSD1   | 9929   | ENSG00000100221 | validated |
| tarbase | hsa-miR-192-5p  | GTPBP1  | 9567   | ENSG00000100226 | validated |
| tarbase | hsa-miR-192-5p  | TIMP3   | 7078   | ENSG00000100234 | validated |
| tarbase | hsa-miR-15b-5p  | TIMP3   | 7078   | ENSG00000100234 | validated |
| tarbase | hsa-miR-181a-5p | TIMP3   | 7078   | ENSG00000100234 | validated |
| tarbase | hsa-miR-296-5p  | SBF1    | 6305   | ENSG00000100241 | validated |
| tarbase | hsa-miR-212-3p  | DNAL4   | 10126  | ENSG00000100246 | validated |
| tarbase | hsa-miR-15b-5p  | LMF2    | 91289  | ENSG00000100258 | validated |
| tarbase | hsa-miR-15b-5p  | RHBDD3  | 25807  | ENSG00000100263 | validated |
| tarbase | hsa-miR-106b-5p | HMGXB4  | 10042  | ENSG00000100281 | validated |
| tarbase | hsa-miR-212-3p  | HMGXB4  | 10042  | ENSG00000100281 | validated |
| tarbase | hsa-miR-582-5p  | HMGXB4  | 10042  | ENSG00000100281 | validated |
| tarbase | hsa-miR-15b-5p  | THOC5   | 8563   | ENSG00000100296 | validated |
| tarbase | hsa-miR-21-5p   | TTL12   | 23170  | ENSG00000100304 | validated |
| tarbase | hsa-miR-106b-5p | CBX7    | 23492  | ENSG00000100307 | validated |
| tarbase | hsa-miR-181a-5p | CBX7    | 23492  | ENSG00000100307 | validated |
| tarbase | hsa-miR-15b-5p  | RBFOX2  | 23543  | ENSG00000100320 | validated |
| tarbase | hsa-miR-222-3p  | RBFOX2  | 23543  | ENSG00000100320 | validated |
| tarbase | hsa-miR-106b-5p | MIEF1   | 54471  | ENSG00000100335 | validated |
| tarbase | hsa-miR-212-3p  | PNPLA5  | 150379 | ENSG00000100341 | validated |
| tarbase | hsa-miR-21-5p   | PNPLA3  | 80339  | ENSG00000100344 | validated |
| tarbase | hsa-miR-21-5p   | MYH9    | 4627   | ENSG00000100345 | validated |
| tarbase | hsa-miR-212-3p  | MYH9    | 4627   | ENSG00000100345 | validated |
| tarbase | hsa-miR-192-5p  | TXN2    | 25828  | ENSG00000100348 | validated |
| tarbase | hsa-miR-144-3p  | TNRC6B  | 23112  | ENSG00000100354 | validated |
| tarbase | hsa-miR-192-5p  | TNRC6B  | 23112  | ENSG00000100354 | validated |
| tarbase | hsa-miR-296-5p  | TNRC6B  | 23112  | ENSG00000100354 | validated |
| tarbase | hsa-miR-505-3p  | TNRC6B  | 23112  | ENSG00000100354 | validated |
| tarbase | hsa-miR-582-5p  | TNRC6B  | 23112  | ENSG00000100354 | validated |
| tarbase | hsa-miR-296-5p  | SGSM3   | 27352  | ENSG00000100359 | validated |
| tarbase | hsa-miR-212-3p  | CSF2RB  | 1439   | ENSG00000100368 | validated |
| tarbase | hsa-miR-106b-5p | FAM118A | 55007  | ENSG00000100376 | validated |
| tarbase | hsa-miR-15b-5p  | FAM118A | 55007  | ENSG00000100376 | validated |
| tarbase | hsa-miR-582-5p  | FAM118A | 55007  | ENSG00000100376 | validated |
| tarbase | hsa-miR-181a-5p | KCTD17  | 79734  | ENSG00000100379 | validated |
| tarbase | hsa-miR-181a-5p | IL2RB   | 3560   | ENSG00000100385 | validated |
| tarbase | hsa-miR-15b-5p  | RBX1    | 9978   | ENSG00000100387 | validated |
| tarbase | hsa-miR-106b-5p | EP300   | 2033   | ENSG00000100393 | validated |
| tarbase | hsa-miR-144-3p  | EP300   | 2033   | ENSG00000100393 | validated |
| tarbase | hsa-miR-15b-5p  | EP300   | 2033   | ENSG00000100393 | validated |
| tarbase | hsa-miR-181a-5p | EP300   | 2033   | ENSG00000100393 | validated |
| tarbase | hsa-miR-192-5p  | EP300   | 2033   | ENSG00000100393 | validated |
| tarbase | hsa-miR-212-3p  | EP300   | 2033   | ENSG00000100393 | validated |
| tarbase | hsa-miR-15b-5p  | RANGAP1 | 5905   | ENSG00000100401 | validated |
| tarbase | hsa-miR-15b-5p  | POLR3H  | 171568 | ENSG00000100413 | validated |
| tarbase | hsa-miR-15b-5p  | DESI1   | 27351  | ENSG00000100418 | validated |
| tarbase | hsa-miR-18a-5p  | CERK    | 64781  | ENSG00000100422 | validated |
| tarbase | hsa-miR-21-5p   | CERK    | 64781  | ENSG00000100422 | validated |
| tarbase | hsa-miR-181a-5p | BRD1    | 23774  | ENSG00000100425 | validated |
| tarbase | hsa-miR-21-5p   | BRD1    | 23774  | ENSG00000100425 | validated |
| tarbase | hsa-miR-326     | BRD1    | 23774  | ENSG00000100425 | validated |
| tarbase | hsa-miR-582-5p  | BRD1    | 23774  | ENSG00000100425 | validated |
| tarbase | hsa-miR-301a-3p | ZBED4   | 9889   | ENSG00000100426 | validated |
| tarbase | hsa-miR-582-3p  | ABHD4   | 63874  | ENSG00000100439 | validated |
| tarbase | hsa-miR-15b-5p  | KHNYN   | 23351  | ENSG00000100441 | validated |
| tarbase | hsa-miR-296-5p  | KHNYN   | 23351  | ENSG00000100441 | validated |
| tarbase | hsa-miR-106b-5p | FKBP3   | 2287   | ENSG00000100442 | validated |
| tarbase | hsa-miR-18a-5p  | RBM23   | 55147  | ENSG00000100461 | validated |

|         |                 |          |        |                 |           |
|---------|-----------------|----------|--------|-----------------|-----------|
| tarbase | hsa-miR-106b-5p | PRMT5    | 10419  | ENSG00000100462 | validated |
| tarbase | hsa-miR-18a-5p  | PRMT5    | 10419  | ENSG00000100462 | validated |
| tarbase | hsa-miR-212-3p  | SOS2     | 6655   | ENSG00000100485 | validated |
| tarbase | hsa-miR-21-5p   | SOS2     | 6655   | ENSG00000100485 | validated |
| tarbase | hsa-miR-15b-5p  | NIN      | 51199  | ENSG00000100503 | validated |
| tarbase | hsa-miR-212-3p  | PYGL     | 5836   | ENSG00000100504 | validated |
| tarbase | hsa-miR-181a-5p | GNPNAT1  | 64841  | ENSG00000100522 | validated |
| tarbase | hsa-miR-301a-3p | GNPNAT1  | 64841  | ENSG00000100522 | validated |
| tarbase | hsa-miR-582-5p  | GNPNAT1  | 64841  | ENSG00000100522 | validated |
| tarbase | hsa-miR-181a-5p | DDHD1    | 80821  | ENSG00000100523 | validated |
| tarbase | hsa-miR-181a-5p | CDKN3    | 1033   | ENSG00000100526 | validated |
| tarbase | hsa-miR-212-3p  | CDKN3    | 1033   | ENSG00000100526 | validated |
| tarbase | hsa-miR-15b-5p  | CNIH1    | 10175  | ENSG00000100528 | validated |
| tarbase | hsa-miR-181a-5p | CNIH1    | 10175  | ENSG00000100528 | validated |
| tarbase | hsa-miR-301a-3p | CNIH1    | 10175  | ENSG00000100528 | validated |
| tarbase | hsa-miR-505-3p  | CNIH1    | 10175  | ENSG00000100528 | validated |
| tarbase | hsa-miR-582-3p  | CNIH1    | 10175  | ENSG00000100528 | validated |
| tarbase | hsa-miR-21-5p   | ATP6V1D  | 51382  | ENSG00000100554 | validated |
| tarbase | hsa-miR-15b-5p  | VTI1B    | 10490  | ENSG00000100568 | validated |
| tarbase | hsa-miR-301a-3p | VTI1B    | 10490  | ENSG00000100568 | validated |
| tarbase | hsa-miR-582-3p  | VTI1B    | 10490  | ENSG00000100568 | validated |
| tarbase | hsa-miR-212-3p  | TIMM9    | 26520  | ENSG00000100575 | validated |
| tarbase | hsa-miR-106b-5p | TMED8    | 283578 | ENSG00000100580 | validated |
| tarbase | hsa-miR-181a-5p | TMED8    | 283578 | ENSG00000100580 | validated |
| tarbase | hsa-miR-212-3p  | TMED8    | 283578 | ENSG00000100580 | validated |
| tarbase | hsa-miR-15b-5p  | TMED8    | 283578 | ENSG00000100580 | validated |
| tarbase | hsa-miR-212-3p  | AHSA1    | 10598  | ENSG00000100591 | validated |
| tarbase | hsa-miR-106b-5p | DAAM1    | 23002  | ENSG00000100592 | validated |
| tarbase | hsa-miR-192-5p  | DAAM1    | 23002  | ENSG00000100592 | validated |
| tarbase | hsa-miR-212-3p  | DAAM1    | 23002  | ENSG00000100592 | validated |
| tarbase | hsa-miR-15b-5p  | SPTLC2   | 9517   | ENSG00000100596 | validated |
| tarbase | hsa-miR-296-5p  | SPTLC2   | 9517   | ENSG00000100596 | validated |
| tarbase | hsa-miR-15b-5p  | CHGA     | 1113   | ENSG00000100604 | validated |
| tarbase | hsa-miR-582-5p  | CHGA     | 1113   | ENSG00000100604 | validated |
| tarbase | hsa-miR-301a-3p | ITPK1    | 3705   | ENSG00000100605 | validated |
| tarbase | hsa-miR-181a-5p | DHRS7    | 51635  | ENSG00000100612 | validated |
| tarbase | hsa-miR-106b-5p | PPM1A    | 5494   | ENSG00000100614 | validated |
| tarbase | hsa-miR-181a-5p | PPM1A    | 5494   | ENSG00000100614 | validated |
| tarbase | hsa-miR-301a-3p | SIX4     | 51804  | ENSG00000100625 | validated |
| tarbase | hsa-miR-212-3p  | ERH      | 2079   | ENSG00000100632 | validated |
| tarbase | hsa-miR-21-5p   | SUSD6    | 9766   | ENSG00000100647 | validated |
| tarbase | hsa-miR-301a-3p | SUSD6    | 9766   | ENSG00000100647 | validated |
| tarbase | hsa-miR-326     | SUSD6    | 9766   | ENSG00000100647 | validated |
| tarbase | hsa-miR-15b-5p  | SUSD6    | 9766   | ENSG00000100647 | validated |
| tarbase | hsa-miR-505-3p  | SRSF5    | 6430   | ENSG00000100650 | validated |
| tarbase | hsa-miR-181a-5p | SRSF5    | 6430   | ENSG00000100650 | validated |
| tarbase | hsa-miR-181a-5p | EIF5     | 1983   | ENSG00000100664 | validated |
| tarbase | hsa-miR-212-3p  | EIF5     | 1983   | ENSG00000100664 | validated |
| tarbase | hsa-miR-301a-3p | EIF5     | 1983   | ENSG00000100664 | validated |
| tarbase | hsa-miR-212-3p  | SERPINA4 | 5267   | ENSG00000100665 | validated |
| tarbase | hsa-miR-106b-5p | DICER1   | 23405  | ENSG00000100697 | validated |
| tarbase | hsa-miR-144-3p  | DICER1   | 23405  | ENSG00000100697 | validated |
| tarbase | hsa-miR-181a-5p | DICER1   | 23405  | ENSG00000100697 | validated |
| tarbase | hsa-miR-212-3p  | DICER1   | 23405  | ENSG00000100697 | validated |
| tarbase | hsa-miR-15b-5p  | ZFYVE21  | 79038  | ENSG00000100711 | validated |
| tarbase | hsa-miR-181a-5p | TCL1A    | 8115   | ENSG00000100721 | validated |
| tarbase | hsa-miR-15b-5p  | ZC3H14   | 79882  | ENSG00000100722 | validated |
| tarbase | hsa-miR-18a-5p  | ZC3H14   | 79882  | ENSG00000100722 | validated |
| tarbase | hsa-miR-21-5p   | ZC3H14   | 79882  | ENSG00000100722 | validated |
| tarbase | hsa-miR-106b-5p | PCNX1    | 22990  | ENSG00000100731 | validated |
| tarbase | hsa-miR-181a-5p | PCNX1    | 22990  | ENSG00000100731 | validated |
| tarbase | hsa-miR-301a-3p | PCNX1    | 22990  | ENSG00000100731 | validated |
| tarbase | hsa-miR-582-5p  | PCNX1    | 22990  | ENSG00000100731 | validated |
| tarbase | hsa-miR-15b-5p  | RPS6KA5  | 9252   | ENSG00000100784 | validated |
| tarbase | hsa-miR-15b-5p  | PPP4R3A  | 55671  | ENSG00000100796 | validated |
| tarbase | hsa-miR-21-5p   | PPP4R3A  | 55671  | ENSG00000100796 | validated |
| tarbase | hsa-miR-301a-3p | PPP4R3A  | 55671  | ENSG00000100796 | validated |
| tarbase | hsa-miR-21-5p   | PSMB5    | 5693   | ENSG00000100804 | validated |
| tarbase | hsa-miR-106b-5p | YY1      | 7528   | ENSG00000100811 | validated |
| tarbase | hsa-miR-181a-5p | YY1      | 7528   | ENSG00000100811 | validated |
| tarbase | hsa-miR-18a-5p  | YY1      | 7528   | ENSG00000100811 | validated |

|         |                 |          |        |                 |           |
|---------|-----------------|----------|--------|-----------------|-----------|
| tarbase | hsa-miR-192-5p  | YY1      | 7528   | ENSG00000100811 | validated |
| tarbase | hsa-miR-21-5p   | YY1      | 7528   | ENSG00000100811 | validated |
| tarbase | hsa-miR-582-5p  | YY1      | 7528   | ENSG00000100811 | validated |
| tarbase | hsa-miR-296-5p  | ACIN1    | 22985  | ENSG00000100813 | validated |
| tarbase | hsa-miR-505-3p  | TRIP11   | 9321   | ENSG00000100815 | validated |
| tarbase | hsa-miR-212-3p  | TRIP11   | 9321   | ENSG00000100815 | validated |
| tarbase | hsa-miR-18a-5p  | APEX1    | 328    | ENSG00000100823 | validated |
| tarbase | hsa-miR-192-5p  | APEX1    | 328    | ENSG00000100823 | validated |
| tarbase | hsa-miR-15b-5p  | PABPN1   | 8106   | ENSG00000100836 | validated |
| tarbase | hsa-miR-296-5p  | PABPN1   | 8106   | ENSG00000100836 | validated |
| tarbase | hsa-miR-326     | PABPN1   | 8106   | ENSG00000100836 | validated |
| tarbase | hsa-miR-582-3p  | PABPN1   | 8106   | ENSG00000100836 | validated |
| tarbase | hsa-miR-106b-5p | ARHGAP5  | 394    | ENSG00000100852 | validated |
| tarbase | hsa-miR-18a-5p  | ARHGAP5  | 394    | ENSG00000100852 | validated |
| tarbase | hsa-miR-212-3p  | ARHGAP5  | 394    | ENSG00000100852 | validated |
| tarbase | hsa-miR-582-5p  | ARHGAP5  | 394    | ENSG00000100852 | validated |
| tarbase | hsa-miR-15b-5p  | ARHGAP5  | 394    | ENSG00000100852 | validated |
| tarbase | hsa-miR-106b-5p | CHD8     | 57680  | ENSG00000100888 | validated |
| tarbase | hsa-miR-296-5p  | CHD8     | 57680  | ENSG00000100888 | validated |
| tarbase | hsa-miR-212-3p  | PCK2     | 5106   | ENSG00000100889 | validated |
| tarbase | hsa-miR-15b-5p  | PRORP    | 9692   | ENSG00000100890 | validated |
| tarbase | hsa-miR-212-3p  | NFKBIA   | 4792   | ENSG00000100906 | validated |
| tarbase | hsa-miR-18a-5p  | NFKBIA   | 4792   | ENSG00000100906 | validated |
| tarbase | hsa-miR-212-3p  | EMC9     | 51016  | ENSG00000100908 | validated |
| tarbase | hsa-miR-21-5p   | BRMS1L   | 84312  | ENSG00000100916 | validated |
| tarbase | hsa-miR-15b-5p  | SEC23A   | 10484  | ENSG00000100934 | validated |
| tarbase | hsa-miR-181a-5p | SEC23A   | 10484  | ENSG00000100934 | validated |
| tarbase | hsa-miR-18a-5p  | SEC23A   | 10484  | ENSG00000100934 | validated |
| tarbase | hsa-miR-222-3p  | SEC23A   | 10484  | ENSG00000100934 | validated |
| tarbase | hsa-miR-15b-5p  | PNN      | 5411   | ENSG00000100941 | validated |
| tarbase | hsa-miR-181a-5p | TRPC4AP  | 26133  | ENSG00000100991 | validated |
| tarbase | hsa-miR-212-3p  | TRPC4AP  | 26133  | ENSG00000100991 | validated |
| tarbase | hsa-miR-18a-5p  | GINS1    | 9837   | ENSG00000101003 | validated |
| tarbase | hsa-miR-106b-5p | GINS1    | 9837   | ENSG00000101003 | validated |
| tarbase | hsa-miR-106b-5p | ZMYND8   | 23613  | ENSG00000101040 | validated |
| tarbase | hsa-miR-181a-5p | ZMYND8   | 23613  | ENSG00000101040 | validated |
| tarbase | hsa-miR-15b-5p  | IFT52    | 51098  | ENSG00000101052 | validated |
| tarbase | hsa-miR-181a-5p | IFT52    | 51098  | ENSG00000101052 | validated |
| tarbase | hsa-miR-582-5p  | MYBL2    | 4605   | ENSG00000101057 | validated |
| tarbase | hsa-miR-192-5p  | NFATC2   | 4773   | ENSG00000101096 | validated |
| tarbase | hsa-miR-326     | RIMS4    | 140730 | ENSG00000101098 | validated |
| tarbase | hsa-miR-21-5p   | PABPC1L  | 80336  | ENSG00000101104 | validated |
| tarbase | hsa-miR-192-5p  | STK4     | 6789   | ENSG00000101109 | validated |
| tarbase | hsa-miR-212-3p  | STK4     | 6789   | ENSG00000101109 | validated |
| tarbase | hsa-miR-301a-3p | STK4     | 6789   | ENSG00000101109 | validated |
| tarbase | hsa-miR-106b-5p | ADNP     | 23394  | ENSG00000101126 | validated |
| tarbase | hsa-miR-18a-5p  | ADNP     | 23394  | ENSG00000101126 | validated |
| tarbase | hsa-miR-192-5p  | ADNP     | 23394  | ENSG00000101126 | validated |
| tarbase | hsa-miR-301a-3p | ADNP     | 23394  | ENSG00000101126 | validated |
| tarbase | hsa-miR-582-3p  | ADNP     | 23394  | ENSG00000101126 | validated |
| tarbase | hsa-miR-582-5p  | ADNP     | 23394  | ENSG00000101126 | validated |
| tarbase | hsa-miR-192-5p  | CSTF1    | 1477   | ENSG00000101138 | validated |
| tarbase | hsa-miR-582-3p  | CSTF1    | 1477   | ENSG00000101138 | validated |
| tarbase | hsa-miR-326     | DNAJC5   | 80331  | ENSG00000101152 | validated |
| tarbase | hsa-miR-106b-5p | CTSZ     | 1522   | ENSG00000101160 | validated |
| tarbase | hsa-miR-18a-5p  | PRELID3B | 51012  | ENSG00000101166 | validated |
| tarbase | hsa-miR-582-5p  | MRGBP    | 55257  | ENSG00000101189 | validated |
| tarbase | hsa-miR-15b-5p  | TCFL5    | 10732  | ENSG00000101190 | validated |
| tarbase | hsa-miR-106b-5p | DIDO1    | 11083  | ENSG00000101191 | validated |
| tarbase | hsa-miR-212-3p  | DIDO1    | 11083  | ENSG00000101191 | validated |
| tarbase | hsa-miR-301a-3p | DIDO1    | 11083  | ENSG00000101191 | validated |
| tarbase | hsa-miR-21-5p   | GID8     | 54994  | ENSG00000101193 | validated |
| tarbase | hsa-miR-212-3p  | SPEF1    | 25876  | ENSG00000101222 | validated |
| tarbase | hsa-miR-212-3p  | CDC25B   | 994    | ENSG00000101224 | validated |
| tarbase | hsa-miR-106b-5p | RNF24    | 11237  | ENSG00000101236 | validated |
| tarbase | hsa-miR-181a-5p | RNF24    | 11237  | ENSG00000101236 | validated |
| tarbase | hsa-miR-21-5p   | RNF24    | 11237  | ENSG00000101236 | validated |
| tarbase | hsa-miR-222-3p  | RNF24    | 11237  | ENSG00000101236 | validated |
| tarbase | hsa-miR-301a-3p | RNF24    | 11237  | ENSG00000101236 | validated |
| tarbase | hsa-miR-296-5p  | ARFRP1   | 10139  | ENSG00000101246 | validated |
| tarbase | hsa-miR-326     | ARFRP1   | 10139  | ENSG00000101246 | validated |

|         |                 |         |        |                 |           |
|---------|-----------------|---------|--------|-----------------|-----------|
| tarbase | hsa-miR-106b-5p | TRIB3   | 57761  | ENSG00000101255 | validated |
| tarbase | hsa-miR-106b-5p | CSNK2A1 | 1457   | ENSG00000101266 | validated |
| tarbase | hsa-miR-15b-5p  | CSNK2A1 | 1457   | ENSG00000101266 | validated |
| tarbase | hsa-miR-18a-5p  | CSNK2A1 | 1457   | ENSG00000101266 | validated |
| tarbase | hsa-miR-21-5p   | CSNK2A1 | 1457   | ENSG00000101266 | validated |
| tarbase | hsa-miR-222-3p  | CSNK2A1 | 1457   | ENSG00000101266 | validated |
| tarbase | hsa-miR-326     | CSNK2A1 | 1457   | ENSG00000101266 | validated |
| tarbase | hsa-miR-21-5p   | CDS2    | 8760   | ENSG00000101290 | validated |
| tarbase | hsa-miR-222-3p  | CDS2    | 8760   | ENSG00000101290 | validated |
| tarbase | hsa-miR-18a-5p  | HM13    | 81502  | ENSG00000101294 | validated |
| tarbase | hsa-miR-296-5p  | SNPH    | 9751   | ENSG00000101298 | validated |
| tarbase | hsa-miR-181a-5p | SEC23B  | 10483  | ENSG00000101310 | validated |
| tarbase | hsa-miR-18a-5p  | SEC23B  | 10483  | ENSG00000101310 | validated |
| tarbase | hsa-miR-181a-5p | FERMT1  | 55612  | ENSG00000101311 | validated |
| tarbase | hsa-miR-212-3p  | PLCB4   | 5332   | ENSG00000101333 | validated |
| tarbase | hsa-miR-18a-5p  | MYL9    | 10398  | ENSG00000101335 | validated |
| tarbase | hsa-miR-106b-5p | TM9SF4  | 9777   | ENSG00000101337 | validated |
| tarbase | hsa-miR-212-3p  | TM9SF4  | 9777   | ENSG00000101337 | validated |
| tarbase | hsa-miR-15b-5p  | POFUT1  | 23509  | ENSG00000101346 | validated |
| tarbase | hsa-miR-18a-5p  | POFUT1  | 23509  | ENSG00000101346 | validated |
| tarbase | hsa-miR-21-5p   | POFUT1  | 23509  | ENSG00000101346 | validated |
| tarbase | hsa-miR-222-3p  | POFUT1  | 23509  | ENSG00000101346 | validated |
| tarbase | hsa-miR-212-3p  | SAMHD1  | 25939  | ENSG00000101347 | validated |
| tarbase | hsa-miR-181a-5p | PAK5    | 57144  | ENSG00000101349 | validated |
| tarbase | hsa-miR-192-5p  | NOP56   | 10528  | ENSG00000101361 | validated |
| tarbase | hsa-miR-296-5p  | NOP56   | 10528  | ENSG00000101361 | validated |
| tarbase | hsa-miR-582-3p  | NOP56   | 10528  | ENSG00000101361 | validated |
| tarbase | hsa-miR-192-5p  | IDH3B   | 3420   | ENSG00000101365 | validated |
| tarbase | hsa-miR-212-3p  | MAPRE1  | 22919  | ENSG00000101367 | validated |
| tarbase | hsa-miR-21-5p   | MAPRE1  | 22919  | ENSG00000101367 | validated |
| tarbase | hsa-miR-296-5p  | SNTA1   | 6640   | ENSG00000101400 | validated |
| tarbase | hsa-miR-181a-5p | TTI1    | 9675   | ENSG00000101407 | validated |
| tarbase | hsa-miR-301a-3p | TTI1    | 9675   | ENSG00000101407 | validated |
| tarbase | hsa-miR-18a-5p  | E2F1    | 1869   | ENSG00000101412 | validated |
| tarbase | hsa-miR-296-5p  | E2F1    | 1869   | ENSG00000101412 | validated |
| tarbase | hsa-miR-301a-3p | E2F1    | 1869   | ENSG00000101412 | validated |
| tarbase | hsa-miR-326     | E2F1    | 1869   | ENSG00000101412 | validated |
| tarbase | hsa-miR-301a-3p | RPRD1B  | 58490  | ENSG00000101413 | validated |
| tarbase | hsa-miR-296-5p  | PXMP4   | 11264  | ENSG00000101417 | validated |
| tarbase | hsa-miR-222-3p  | FAM83D  | 81610  | ENSG00000101447 | validated |
| tarbase | hsa-miR-301a-3p | ACOT8   | 10005  | ENSG00000101473 | validated |
| tarbase | hsa-miR-505-3p  | APMAP   | 57136  | ENSG00000101474 | validated |
| tarbase | hsa-miR-181a-5p | ZNF516  | 9658   | ENSG00000101493 | validated |
| tarbase | hsa-miR-15b-5p  | ADNP2   | 22850  | ENSG00000101544 | validated |
| tarbase | hsa-miR-181a-5p | ADNP2   | 22850  | ENSG00000101544 | validated |
| tarbase | hsa-miR-301a-3p | ADNP2   | 22850  | ENSG00000101544 | validated |
| tarbase | hsa-miR-582-5p  | ADNP2   | 22850  | ENSG00000101544 | validated |
| tarbase | hsa-miR-15b-5p  | USP14   | 9097   | ENSG00000101557 | validated |
| tarbase | hsa-miR-181a-5p | USP14   | 9097   | ENSG00000101557 | validated |
| tarbase | hsa-miR-21-5p   | VAPA    | 9218   | ENSG00000101558 | validated |
| tarbase | hsa-miR-15b-5p  | VAPA    | 9218   | ENSG00000101558 | validated |
| tarbase | hsa-miR-106b-5p | METTL4  | 64863  | ENSG00000101574 | validated |
| tarbase | hsa-miR-15b-5p  | METTL4  | 64863  | ENSG00000101574 | validated |
| tarbase | hsa-miR-21-5p   | SMCHD1  | 23347  | ENSG00000101596 | validated |
| tarbase | hsa-miR-582-5p  | SMCHD1  | 23347  | ENSG00000101596 | validated |
| tarbase | hsa-miR-15b-5p  | MYL12A  | 10627  | ENSG00000101608 | validated |
| tarbase | hsa-miR-21-5p   | CEP192  | 55125  | ENSG00000101639 | validated |
| tarbase | hsa-miR-181a-5p | SMAD7   | 4092   | ENSG00000101665 | validated |
| tarbase | hsa-miR-18a-5p  | SMAD7   | 4092   | ENSG00000101665 | validated |
| tarbase | hsa-miR-505-3p  | LAMA1   | 284217 | ENSG00000101680 | validated |
| tarbase | hsa-miR-15b-5p  | ANKRD12 | 23253  | ENSG00000101745 | validated |
| tarbase | hsa-miR-222-3p  | ANKRD12 | 23253  | ENSG00000101745 | validated |
| tarbase | hsa-miR-326     | ANKRD12 | 23253  | ENSG00000101745 | validated |
| tarbase | hsa-miR-582-3p  | ANKRD12 | 23253  | ENSG00000101745 | validated |
| tarbase | hsa-miR-582-5p  | ANKRD12 | 23253  | ENSG00000101745 | validated |
| tarbase | hsa-miR-18a-5p  | POLI    | 11201  | ENSG00000101751 | validated |
| tarbase | hsa-miR-181a-5p | MIB1    | 57534  | ENSG00000101752 | validated |
| tarbase | hsa-miR-301a-3p | RBBP8   | 5932   | ENSG00000101773 | validated |
| tarbase | hsa-miR-18a-5p  | CSTF2   | 1478   | ENSG00000101811 | validated |
| tarbase | hsa-miR-301a-3p | CSTF2   | 1478   | ENSG00000101811 | validated |
| tarbase | hsa-miR-15b-5p  | PGRMC1  | 10857  | ENSG00000101856 | validated |



|         |                 |         |        |                 |           |
|---------|-----------------|---------|--------|-----------------|-----------|
| tarbase | hsa-miR-192-5p  | PGRMC1  | 10857  | ENSG00000101856 | validated |
| tarbase | hsa-miR-21-5p   | PGRMC1  | 10857  | ENSG00000101856 | validated |
| tarbase | hsa-miR-582-3p  | PGRMC1  | 10857  | ENSG00000101856 | validated |
| tarbase | hsa-miR-106b-5p | MID1    | 4281   | ENSG00000101871 | validated |
| tarbase | hsa-miR-296-5p  | MID1    | 4281   | ENSG00000101871 | validated |
| tarbase | hsa-miR-15b-5p  | NKAP    | 79576  | ENSG00000101882 | validated |
| tarbase | hsa-miR-106b-5p | ALG13   | 79868  | ENSG00000101901 | validated |
| tarbase | hsa-miR-301a-3p | AMMECR1 | 9949   | ENSG00000101935 | validated |
| tarbase | hsa-miR-582-3p  | AMMECR1 | 9949   | ENSG00000101935 | validated |
| tarbase | hsa-miR-15b-5p  | XIAP    | 331    | ENSG00000101966 | validated |
| tarbase | hsa-miR-212-3p  | STAG2   | 10735  | ENSG00000101972 | validated |
| tarbase | hsa-miR-582-3p  | STAG2   | 10735  | ENSG00000101972 | validated |
| tarbase | hsa-miR-18a-5p  | STAG2   | 10735  | ENSG00000101972 | validated |
| tarbase | hsa-miR-106b-5p | PLS3    | 5358   | ENSG00000102024 | validated |
| tarbase | hsa-miR-181a-5p | PLS3    | 5358   | ENSG00000102024 | validated |
| tarbase | hsa-miR-21-5p   | PLS3    | 5358   | ENSG00000102024 | validated |
| tarbase | hsa-miR-582-5p  | PLS3    | 5358   | ENSG00000102024 | validated |
| tarbase | hsa-miR-326     | NAA10   | 8260   | ENSG00000102030 | validated |
| tarbase | hsa-miR-15b-5p  | SMARCA1 | 6594   | ENSG00000102038 | validated |
| tarbase | hsa-miR-181a-5p | ZC3H12B | 340554 | ENSG00000102053 | validated |
| tarbase | hsa-miR-144-3p  | RBBP7   | 5931   | ENSG00000102054 | validated |
| tarbase | hsa-miR-181a-5p | RBBP7   | 5931   | ENSG00000102054 | validated |
| tarbase | hsa-miR-222-3p  | RBBP7   | 5931   | ENSG00000102054 | validated |
| tarbase | hsa-miR-15b-5p  | PIM2    | 11040  | ENSG00000102096 | validated |
| tarbase | hsa-miR-106b-5p | SCML2   | 10389  | ENSG00000102098 | validated |
| tarbase | hsa-miR-15b-5p  | SCML2   | 10389  | ENSG00000102098 | validated |
| tarbase | hsa-miR-212-3p  | SCML2   | 10389  | ENSG00000102098 | validated |
| tarbase | hsa-miR-15b-5p  | EMD     | 2010   | ENSG00000102119 | validated |
| tarbase | hsa-miR-296-5p  | EMD     | 2010   | ENSG00000102119 | validated |
| tarbase | hsa-miR-181a-5p | PGK1    | 5230   | ENSG00000102144 | validated |
| tarbase | hsa-miR-212-3p  | PGK1    | 5230   | ENSG00000102144 | validated |
| tarbase | hsa-miR-21-5p   | PGK1    | 5230   | ENSG00000102144 | validated |
| tarbase | hsa-miR-106b-5p | MAGT1   | 84061  | ENSG00000102158 | validated |
| tarbase | hsa-miR-181a-5p | MAGT1   | 84061  | ENSG00000102158 | validated |
| tarbase | hsa-miR-181a-5p | SMS     | 6611   | ENSG00000102172 | validated |
| tarbase | hsa-miR-106b-5p | RP2     | 6102   | ENSG00000102218 | validated |
| tarbase | hsa-miR-212-3p  | RP2     | 6102   | ENSG00000102218 | validated |
| tarbase | hsa-miR-296-5p  | CDK16   | 5127   | ENSG00000102225 | validated |
| tarbase | hsa-miR-15b-5p  | USP11   | 8237   | ENSG00000102226 | validated |
| tarbase | hsa-miR-212-3p  | TIMP1   | 7076   | ENSG00000102265 | validated |
| tarbase | hsa-miR-222-3p  | PIN4    | 5303   | ENSG00000102309 | validated |
| tarbase | hsa-miR-106b-5p | MAGED2  | 10916  | ENSG00000102316 | validated |
| tarbase | hsa-miR-326     | MAGED2  | 10916  | ENSG00000102316 | validated |
| tarbase | hsa-miR-18a-5p  | RBM3    | 5935   | ENSG00000102317 | validated |
| tarbase | hsa-miR-106b-5p | SYTL4   | 94121  | ENSG00000102362 | validated |
| tarbase | hsa-miR-106b-5p | CENPI   | 2491   | ENSG00000102384 | validated |
| tarbase | hsa-miR-181a-5p | CENPI   | 2491   | ENSG00000102384 | validated |
| tarbase | hsa-miR-212-3p  | ARMCX3  | 51566  | ENSG00000102401 | validated |
| tarbase | hsa-miR-181a-5p | ARMCX3  | 51566  | ENSG00000102401 | validated |
| tarbase | hsa-miR-181a-5p | BEX4    | 56271  | ENSG00000102409 | validated |
| tarbase | hsa-miR-181a-5p | HTR2A   | 3356   | ENSG00000102468 | validated |
| tarbase | hsa-miR-181a-5p | NDFIP2  | 54602  | ENSG00000102471 | validated |
| tarbase | hsa-miR-15b-5p  | FNDC3A  | 22862  | ENSG00000102531 | validated |
| tarbase | hsa-miR-181a-5p | FNDC3A  | 22862  | ENSG00000102531 | validated |
| tarbase | hsa-miR-18a-5p  | FNDC3A  | 22862  | ENSG00000102531 | validated |
| tarbase | hsa-miR-222-3p  | FNDC3A  | 22862  | ENSG00000102531 | validated |
| tarbase | hsa-miR-326     | FNDC3A  | 22862  | ENSG00000102531 | validated |
| tarbase | hsa-miR-582-3p  | FNDC3A  | 22862  | ENSG00000102531 | validated |
| tarbase | hsa-miR-181a-5p | CDADC1  | 81602  | ENSG00000102543 | validated |
| tarbase | hsa-miR-15b-5p  | KLF5    | 688    | ENSG00000102554 | validated |
| tarbase | hsa-miR-582-3p  | KLF5    | 688    | ENSG00000102554 | validated |
| tarbase | hsa-miR-21-5p   | ARHGEF7 | 8874   | ENSG00000102606 | validated |
| tarbase | hsa-miR-181a-5p | ARHGEF7 | 8874   | ENSG00000102606 | validated |
| tarbase | hsa-miR-15b-5p  | FGF9    | 2254   | ENSG00000102678 | validated |
| tarbase | hsa-miR-212-3p  | FGF9    | 2254   | ENSG00000102678 | validated |
| tarbase | hsa-miR-106b-5p | KPNA3   | 3839   | ENSG00000102753 | validated |
| tarbase | hsa-miR-18a-5p  | KPNA3   | 3839   | ENSG00000102753 | validated |
| tarbase | hsa-miR-192-5p  | KPNA3   | 3839   | ENSG00000102753 | validated |
| tarbase | hsa-miR-181a-5p | FLT1    | 2321   | ENSG00000102755 | validated |
| tarbase | hsa-miR-222-3p  | FLT1    | 2321   | ENSG00000102755 | validated |
| tarbase | hsa-miR-106b-5p | DGKH    | 160851 | ENSG00000102780 | validated |

|         |                 |          |        |                 |           |
|---------|-----------------|----------|--------|-----------------|-----------|
| tarbase | hsa-miR-301a-3p | DGKH     | 160851 | ENSG00000102780 | validated |
| tarbase | hsa-miR-582-3p  | KATNAL1  | 84056  | ENSG00000102781 | validated |
| tarbase | hsa-miR-181a-5p | KATNAL1  | 84056  | ENSG00000102781 | validated |
| tarbase | hsa-miR-181a-5p | INTS6    | 26512  | ENSG00000102786 | validated |
| tarbase | hsa-miR-582-5p  | INTS6    | 26512  | ENSG00000102786 | validated |
| tarbase | hsa-miR-326     | ACOD1    | 730249 | ENSG00000102794 | validated |
| tarbase | hsa-miR-15b-5p  | TSC22D1  | 8848   | ENSG00000102804 | validated |
| tarbase | hsa-miR-181a-5p | TSC22D1  | 8848   | ENSG00000102804 | validated |
| tarbase | hsa-miR-301a-3p | TSC22D1  | 8848   | ENSG00000102804 | validated |
| tarbase | hsa-miR-212-3p  | MSLN     | 10232  | ENSG00000102854 | validated |
| tarbase | hsa-miR-192-5p  | MGRN1    | 23295  | ENSG00000102858 | validated |
| tarbase | hsa-miR-181a-5p | ZNF629   | 23361  | ENSG00000102870 | validated |
| tarbase | hsa-miR-18a-5p  | ZNF629   | 23361  | ENSG00000102870 | validated |
| tarbase | hsa-miR-222-3p  | ZNF629   | 23361  | ENSG00000102870 | validated |
| tarbase | hsa-miR-326     | ZNF629   | 23361  | ENSG00000102870 | validated |
| tarbase | hsa-miR-582-5p  | ZNF629   | 23361  | ENSG00000102870 | validated |
| tarbase | hsa-miR-181a-5p | MAPK3    | 5595   | ENSG00000102882 | validated |
| tarbase | hsa-miR-212-3p  | GDPD3    | 79153  | ENSG00000102886 | validated |
| tarbase | hsa-miR-181a-5p | LYRM1    | 57149  | ENSG00000102897 | validated |
| tarbase | hsa-miR-18a-5p  | NUP93    | 9688   | ENSG00000102900 | validated |
| tarbase | hsa-miR-21-5p   | NUP93    | 9688   | ENSG00000102900 | validated |
| tarbase | hsa-miR-222-3p  | NUP93    | 9688   | ENSG00000102900 | validated |
| tarbase | hsa-miR-212-3p  | TSNAXIP1 | 55815  | ENSG00000102904 | validated |
| tarbase | hsa-miR-212-3p  | NFAT5    | 10725  | ENSG00000102908 | validated |
| tarbase | hsa-miR-582-3p  | NFAT5    | 10725  | ENSG00000102908 | validated |
| tarbase | hsa-miR-181a-5p | NFAT5    | 10725  | ENSG00000102908 | validated |
| tarbase | hsa-miR-326     | LONP2    | 83752  | ENSG00000102910 | validated |
| tarbase | hsa-miR-212-3p  | N4BP1    | 9683   | ENSG00000102921 | validated |
| tarbase | hsa-miR-301a-3p | N4BP1    | 9683   | ENSG00000102921 | validated |
| tarbase | hsa-miR-212-3p  | CBLN1    | 869    | ENSG00000102924 | validated |
| tarbase | hsa-miR-181a-5p | ARL2BP   | 23568  | ENSG00000102931 | validated |
| tarbase | hsa-miR-21-5p   | ARL2BP   | 23568  | ENSG00000102931 | validated |
| tarbase | hsa-miR-212-3p  | ZNF423   | 23090  | ENSG00000102935 | validated |
| tarbase | hsa-miR-181a-5p | CTCF     | 10664  | ENSG00000102974 | validated |
| tarbase | hsa-miR-222-3p  | CTCF     | 10664  | ENSG00000102974 | validated |
| tarbase | hsa-miR-582-3p  | CTCF     | 10664  | ENSG00000102974 | validated |
| tarbase | hsa-miR-106b-5p | ACD      | 65057  | ENSG00000102977 | validated |
| tarbase | hsa-miR-582-3p  | CYB5B    | 80777  | ENSG00000103018 | validated |
| tarbase | hsa-miR-212-3p  | CCDC113  | 29070  | ENSG00000103021 | validated |
| tarbase | hsa-miR-15b-5p  | NME3     | 4832   | ENSG00000103024 | validated |
| tarbase | hsa-miR-144-3p  | PSMD7    | 5713   | ENSG00000103035 | validated |
| tarbase | hsa-miR-15b-5p  | SLC7A6   | 9057   | ENSG00000103064 | validated |
| tarbase | hsa-miR-21-5p   | SLC7A6   | 9057   | ENSG00000103064 | validated |
| tarbase | hsa-miR-15b-5p  | PLA2G15  | 23659  | ENSG00000103066 | validated |
| tarbase | hsa-miR-181a-5p | ESRP2    | 80004  | ENSG00000103067 | validated |
| tarbase | hsa-miR-301a-3p | ESRP2    | 80004  | ENSG00000103067 | validated |
| tarbase | hsa-miR-15b-5p  | MON1B    | 22879  | ENSG00000103111 | validated |
| tarbase | hsa-miR-181a-5p | CMC2     | 56942  | ENSG00000103121 | validated |
| tarbase | hsa-miR-192-5p  | AXIN1    | 8312   | ENSG00000103126 | validated |
| tarbase | hsa-miR-21-5p   | AXIN1    | 8312   | ENSG00000103126 | validated |
| tarbase | hsa-miR-181a-5p | HSDL1    | 83693  | ENSG00000103160 | validated |
| tarbase | hsa-miR-15b-5p  | NME4     | 4833   | ENSG00000103202 | validated |
| tarbase | hsa-miR-296-5p  | NME4     | 4833   | ENSG00000103202 | validated |
| tarbase | hsa-miR-326     | NME4     | 4833   | ENSG00000103202 | validated |
| tarbase | hsa-miR-582-3p  | NME4     | 4833   | ENSG00000103202 | validated |
| tarbase | hsa-miR-582-5p  | FOXF1    | 2294   | ENSG00000103241 | validated |
| tarbase | hsa-miR-326     | CLCN7    | 1186   | ENSG00000103249 | validated |
| tarbase | hsa-miR-582-3p  | SLC7A5   | 8140   | ENSG00000103257 | validated |
| tarbase | hsa-miR-106b-5p | SLC7A5   | 8140   | ENSG00000103257 | validated |
| tarbase | hsa-miR-212-3p  | SLC7A5   | 8140   | ENSG00000103257 | validated |
| tarbase | hsa-miR-212-3p  | METRNL   | 79006  | ENSG00000103260 | validated |
| tarbase | hsa-miR-296-5p  | STUB1    | 10273  | ENSG00000103266 | validated |
| tarbase | hsa-miR-192-5p  | RHBDL1   | 9028   | ENSG00000103269 | validated |
| tarbase | hsa-miR-15b-5p  | UBE2I    | 7329   | ENSG00000103275 | validated |
| tarbase | hsa-miR-181a-5p | UBE2I    | 7329   | ENSG00000103275 | validated |
| tarbase | hsa-miR-18a-5p  | CAPN15   | 6650   | ENSG00000103326 | validated |
| tarbase | hsa-miR-296-5p  | CAPN15   | 6650   | ENSG00000103326 | validated |
| tarbase | hsa-miR-582-5p  | CAPN15   | 6650   | ENSG00000103326 | validated |
| tarbase | hsa-miR-301a-3p | PIEZO1   | 9780   | ENSG00000103335 | validated |
| tarbase | hsa-miR-582-3p  | PIEZO1   | 9780   | ENSG00000103335 | validated |
| tarbase | hsa-miR-106b-5p | GSPT1    | 2935   | ENSG00000103342 | validated |

|         |                 |          |        |                 |           |
|---------|-----------------|----------|--------|-----------------|-----------|
| tarbase | hsa-miR-181a-5p | GSPT1    | 2935   | ENSG00000103342 | validated |
| tarbase | hsa-miR-18a-5p  | GSPT1    | 2935   | ENSG00000103342 | validated |
| tarbase | hsa-miR-21-5p   | GSPT1    | 2935   | ENSG00000103342 | validated |
| tarbase | hsa-miR-15b-5p  | UBFD1    | 56061  | ENSG00000103353 | validated |
| tarbase | hsa-miR-301a-3p | UBFD1    | 56061  | ENSG00000103353 | validated |
| tarbase | hsa-miR-106b-5p | GGA2     | 23062  | ENSG00000103365 | validated |
| tarbase | hsa-miR-15b-5p  | GGA2     | 23062  | ENSG00000103365 | validated |
| tarbase | hsa-miR-301a-3p | GGA2     | 23062  | ENSG00000103365 | validated |
| tarbase | hsa-miR-106b-5p | USP31    | 57478  | ENSG00000103404 | validated |
| tarbase | hsa-miR-301a-3p | USP31    | 57478  | ENSG00000103404 | validated |
| tarbase | hsa-miR-582-5p  | USP31    | 57478  | ENSG00000103404 | validated |
| tarbase | hsa-miR-15b-5p  | DNAJA3   | 9093   | ENSG00000103423 | validated |
| tarbase | hsa-miR-15b-5p  | BFAR     | 51283  | ENSG00000103429 | validated |
| tarbase | hsa-miR-106b-5p | SALL1    | 6299   | ENSG00000103449 | validated |
| tarbase | hsa-miR-15b-5p  | RBL2     | 5934   | ENSG00000103479 | validated |
| tarbase | hsa-miR-181a-5p | RBL2     | 5934   | ENSG00000103479 | validated |
| tarbase | hsa-miR-582-5p  | RBL2     | 5934   | ENSG00000103479 | validated |
| tarbase | hsa-miR-212-3p  | RPGRIP1L | 23322  | ENSG00000103494 | validated |
| tarbase | hsa-miR-15b-5p  | MAZ      | 4150   | ENSG00000103495 | validated |
| tarbase | hsa-miR-296-5p  | MAZ      | 4150   | ENSG00000103495 | validated |
| tarbase | hsa-miR-15b-5p  | CDIPT    | 10423  | ENSG00000103502 | validated |
| tarbase | hsa-miR-181a-5p | CDIPT    | 10423  | ENSG00000103502 | validated |
| tarbase | hsa-miR-181a-5p | TMC5     | 79838  | ENSG00000103534 | validated |
| tarbase | hsa-miR-181a-5p | CCP110   | 9738   | ENSG00000103540 | validated |
| tarbase | hsa-miR-326     | RNF40    | 9810   | ENSG00000103549 | validated |
| tarbase | hsa-miR-212-3p  | IQCH     | 64799  | ENSG00000103599 | validated |
| tarbase | hsa-miR-301a-3p | CSK      | 1445   | ENSG00000103653 | validated |
| tarbase | hsa-miR-15b-5p  | HERC1    | 8925   | ENSG00000103657 | validated |
| tarbase | hsa-miR-15b-5p  | RAB11A   | 8766   | ENSG00000103769 | validated |
| tarbase | hsa-miR-21-5p   | RAB11A   | 8766   | ENSG00000103769 | validated |
| tarbase | hsa-miR-326     | CD276    | 80381  | ENSG00000103855 | validated |
| tarbase | hsa-miR-181a-5p | CEMIP    | 57214  | ENSG00000103888 | validated |
| tarbase | hsa-miR-15b-5p  | TMEM87A  | 25963  | ENSG00000103978 | validated |
| tarbase | hsa-miR-212-3p  | TMEM87A  | 25963  | ENSG00000103978 | validated |
| tarbase | hsa-miR-106b-5p | ZNF106   | 64397  | ENSG00000103994 | validated |
| tarbase | hsa-miR-181a-5p | ZNF106   | 64397  | ENSG00000103994 | validated |
| tarbase | hsa-miR-212-3p  | ZNF106   | 64397  | ENSG00000103994 | validated |
| tarbase | hsa-miR-582-5p  | FAM189A1 | 23359  | ENSG00000104059 | validated |
| tarbase | hsa-miR-181a-5p | TJP1     | 7082   | ENSG00000104067 | validated |
| tarbase | hsa-miR-106b-5p | TJP1     | 7082   | ENSG00000104067 | validated |
| tarbase | hsa-miR-296-5p  | BMF      | 90427  | ENSG00000104081 | validated |
| tarbase | hsa-miR-582-3p  | BMF      | 90427  | ENSG00000104081 | validated |
| tarbase | hsa-miR-15b-5p  | DMXL2    | 23312  | ENSG00000104093 | validated |
| tarbase | hsa-miR-181a-5p | DMXL2    | 23312  | ENSG00000104093 | validated |
| tarbase | hsa-miR-212-3p  | SCG3     | 29106  | ENSG00000104112 | validated |
| tarbase | hsa-miR-21-5p   | EIF3J    | 8669   | ENSG00000104131 | validated |
| tarbase | hsa-miR-212-3p  | RHOV     | 171177 | ENSG00000104140 | validated |
| tarbase | hsa-miR-582-5p  | OIP5     | 11339  | ENSG00000104147 | validated |
| tarbase | hsa-miR-181a-5p | BLOC1S6  | 26258  | ENSG00000104164 | validated |
| tarbase | hsa-miR-21-5p   | BLOC1S6  | 26258  | ENSG00000104164 | validated |
| tarbase | hsa-miR-18a-5p  | BLOC1S6  | 26258  | ENSG00000104164 | validated |
| tarbase | hsa-miR-222-3p  | TRIM35   | 23087  | ENSG00000104228 | validated |
| tarbase | hsa-miR-181a-5p | ZFAND1   | 79752  | ENSG00000104231 | validated |
| tarbase | hsa-miR-106b-5p |          |        | ENSG00000104237 | validated |
| tarbase | hsa-miR-505-3p  | CA2      | 760    | ENSG00000104267 | validated |
| tarbase | hsa-miR-582-5p  | CA2      | 760    | ENSG00000104267 | validated |
| tarbase | hsa-miR-106b-5p | FZD3     | 7976   | ENSG00000104290 | validated |
| tarbase | hsa-miR-301a-3p | FZD3     | 7976   | ENSG00000104290 | validated |
| tarbase | hsa-miR-582-5p  | FZD3     | 7976   | ENSG00000104290 | validated |
| tarbase | hsa-miR-212-3p  | EYA1     | 2138   | ENSG00000104313 | validated |
| tarbase | hsa-miR-181a-5p | NBN      | 4683   | ENSG00000104320 | validated |
| tarbase | hsa-miR-181a-5p | IMPAD1   | 54928  | ENSG00000104331 | validated |
| tarbase | hsa-miR-212-3p  | LAPTM4B  | 55353  | ENSG00000104341 | validated |
| tarbase | hsa-miR-106b-5p | UBE2W    | 55284  | ENSG00000104343 | validated |
| tarbase | hsa-miR-181a-5p | UBE2W    | 55284  | ENSG00000104343 | validated |
| tarbase | hsa-miR-21-5p   | UBE2W    | 55284  | ENSG00000104343 | validated |
| tarbase | hsa-miR-301a-3p | UBE2W    | 55284  | ENSG00000104343 | validated |
| tarbase | hsa-miR-212-3p  | NIPAL2   | 79815  | ENSG00000104361 | validated |
| tarbase | hsa-miR-15b-5p  | IKBKB    | 3551   | ENSG00000104365 | validated |
| tarbase | hsa-miR-106b-5p | JPH1     | 56704  | ENSG00000104369 | validated |
| tarbase | hsa-miR-106b-5p | EIF3E    | 3646   | ENSG00000104408 | validated |

|         |                 |          |        |                 |           |
|---------|-----------------|----------|--------|-----------------|-----------|
| tarbase | hsa-miR-222-3p  | EIF3E    | 3646   | ENSG00000104408 | validated |
| tarbase | hsa-miR-15b-5p  | EMC2     | 9694   | ENSG00000104412 | validated |
| tarbase | hsa-miR-212-3p  | EMC2     | 9694   | ENSG00000104412 | validated |
| tarbase | hsa-miR-181a-5p | EMC2     | 9694   | ENSG00000104412 | validated |
| tarbase | hsa-miR-106b-5p | ESRP1    | 54845  | ENSG00000104413 | validated |
| tarbase | hsa-miR-18a-5p  | ESRP1    | 54845  | ENSG00000104413 | validated |
| tarbase | hsa-miR-582-3p  | ESRP1    | 54845  | ENSG00000104413 | validated |
| tarbase | hsa-miR-106b-5p | NDRG1    | 10397  | ENSG00000104419 | validated |
| tarbase | hsa-miR-212-3p  | NDRG1    | 10397  | ENSG00000104419 | validated |
| tarbase | hsa-miR-212-3p  | IL7      | 3574   | ENSG00000104432 | validated |
| tarbase | hsa-miR-106b-5p | ARMC1    | 55156  | ENSG00000104442 | validated |
| tarbase | hsa-miR-15b-5p  | ARMC1    | 55156  | ENSG00000104442 | validated |
| tarbase | hsa-miR-106b-5p | TRPS1    | 7227   | ENSG00000104447 | validated |
| tarbase | hsa-miR-15b-5p  | TRPS1    | 7227   | ENSG00000104447 | validated |
| tarbase | hsa-miR-18a-5p  | TRPS1    | 7227   | ENSG00000104447 | validated |
| tarbase | hsa-miR-212-3p  | TRPS1    | 7227   | ENSG00000104447 | validated |
| tarbase | hsa-miR-106b-5p | CHRAC1   | 54108  | ENSG00000104472 | validated |
| tarbase | hsa-miR-181a-5p | NCALD    | 83988  | ENSG00000104490 | validated |
| tarbase | hsa-miR-106b-5p | SNX16    | 64089  | ENSG00000104497 | validated |
| tarbase | hsa-miR-212-3p  | SNX16    | 64089  | ENSG00000104497 | validated |
| tarbase | hsa-miR-181a-5p | UBR5     | 51366  | ENSG00000104517 | validated |
| tarbase | hsa-miR-301a-3p | UBR5     | 51366  | ENSG00000104517 | validated |
| tarbase | hsa-miR-181a-5p | GSDMD    | 79792  | ENSG00000104518 | validated |
| tarbase | hsa-miR-15b-5p  | EEF1D    | 1936   | ENSG00000104529 | validated |
| tarbase | hsa-miR-212-3p  | EEF1D    | 1936   | ENSG00000104529 | validated |
| tarbase | hsa-miR-222-3p  | EEF1D    | 1936   | ENSG00000104529 | validated |
| tarbase | hsa-miR-296-5p  | EEF1D    | 1936   | ENSG00000104529 | validated |
| tarbase | hsa-miR-301a-3p | EEF1D    | 1936   | ENSG00000104529 | validated |
| tarbase | hsa-miR-326     | EEF1D    | 1936   | ENSG00000104529 | validated |
| tarbase | hsa-miR-582-3p  | EEF1D    | 1936   | ENSG00000104529 | validated |
| tarbase | hsa-miR-15b-5p  | SQLE     | 6713   | ENSG00000104549 | validated |
| tarbase | hsa-miR-18a-5p  | ERI1     | 90459  | ENSG00000104626 | validated |
| tarbase | hsa-miR-106b-5p | SLC39A14 | 23516  | ENSG00000104635 | validated |
| tarbase | hsa-miR-18a-5p  | SLC39A14 | 23516  | ENSG00000104635 | validated |
| tarbase | hsa-miR-21-5p   | SLC39A14 | 23516  | ENSG00000104635 | validated |
| tarbase | hsa-miR-181a-5p | MTMR9    | 66036  | ENSG00000104643 | validated |
| tarbase | hsa-miR-301a-3p | MTMR9    | 66036  | ENSG00000104643 | validated |
| tarbase | hsa-miR-21-5p   | LEPROTL1 | 23484  | ENSG00000104660 | validated |
| tarbase | hsa-miR-15b-5p  | PPP2CB   | 5516   | ENSG00000104695 | validated |
| tarbase | hsa-miR-222-3p  | PPP2CB   | 5516   | ENSG00000104695 | validated |
| tarbase | hsa-miR-15b-5p  | ERICH1   | 157697 | ENSG00000104714 | validated |
| tarbase | hsa-miR-326     | ERICH1   | 157697 | ENSG00000104714 | validated |
| tarbase | hsa-miR-15b-5p  | TUSC3    | 7991   | ENSG00000104723 | validated |
| tarbase | hsa-miR-106b-5p | ARHGEF10 | 9639   | ENSG00000104728 | validated |
| tarbase | hsa-miR-106b-5p | MCM4     | 4173   | ENSG00000104738 | validated |
| tarbase | hsa-miR-21-5p   | MCM4     | 4173   | ENSG00000104738 | validated |
| tarbase | hsa-miR-212-3p  | FGL1     | 2267   | ENSG00000104760 | validated |
| tarbase | hsa-miR-181a-5p | BNIP3L   | 665    | ENSG00000104765 | validated |
| tarbase | hsa-miR-15b-5p  | KCNN4    | 3783   | ENSG00000104783 | validated |
| tarbase | hsa-miR-15b-5p  | NUCB1    | 4924   | ENSG00000104805 | validated |
| tarbase | hsa-miR-21-5p   | NUCB1    | 4924   | ENSG00000104805 | validated |
| tarbase | hsa-miR-18a-5p  | HNRNPL   | 3191   | ENSG00000104824 | validated |
| tarbase | hsa-miR-21-5p   | SNRNP70  | 6625   | ENSG00000104852 | validated |
| tarbase | hsa-miR-106b-5p | CLPTM1   | 1209   | ENSG00000104853 | validated |
| tarbase | hsa-miR-296-5p  | CLPTM1   | 1209   | ENSG00000104853 | validated |
| tarbase | hsa-miR-301a-3p | CLPTM1   | 1209   | ENSG00000104853 | validated |
| tarbase | hsa-miR-212-3p  | RELB     | 5971   | ENSG00000104856 | validated |
| tarbase | hsa-miR-212-3p  | LIN7B    | 64130  | ENSG00000104863 | validated |
| tarbase | hsa-miR-21-5p   | PPP1R37  | 284352 | ENSG00000104866 | validated |
| tarbase | hsa-miR-15b-5p  | ARHGEF18 | 23370  | ENSG00000104880 | validated |
| tarbase | hsa-miR-15b-5p  | DOT1L    | 84444  | ENSG00000104885 | validated |
| tarbase | hsa-miR-181a-5p | PLEKHJ1  | 55111  | ENSG00000104886 | validated |
| tarbase | hsa-miR-18a-5p  | PLEKHJ1  | 55111  | ENSG00000104886 | validated |
| tarbase | hsa-miR-15b-5p  | SF3A2    | 8175   | ENSG00000104897 | validated |
| tarbase | hsa-miR-301a-3p | SF3A2    | 8175   | ENSG00000104897 | validated |
| tarbase | hsa-miR-296-5p  | AMH      | 268    | ENSG00000104899 | validated |
| tarbase | hsa-miR-181a-5p | OAZ1     | 4946   | ENSG00000104904 | validated |
| tarbase | hsa-miR-296-5p  | OAZ1     | 4946   | ENSG00000104904 | validated |
| tarbase | hsa-miR-181a-5p | TRMT1    | 55621  | ENSG00000104907 | validated |
| tarbase | hsa-miR-18a-5p  | DMPK     | 1760   | ENSG00000104936 | validated |
| tarbase | hsa-miR-15b-5p  | TBC1D17  | 79735  | ENSG00000104946 | validated |

|         |                 |          |        |                 |           |
|---------|-----------------|----------|--------|-----------------|-----------|
| tarbase | hsa-miR-296-5p  | PTOV1    | 53635  | ENSG00000104960 | validated |
| tarbase | hsa-miR-192-5p  | TLE5     | 166    | ENSG00000104964 | validated |
| tarbase | hsa-miR-181a-5p | TLE5     | 166    | ENSG00000104964 | validated |
| tarbase | hsa-miR-15b-5p  | ASF1B    | 55723  | ENSG00000105011 | validated |
| tarbase | hsa-miR-301a-3p | ASF1B    | 55723  | ENSG00000105011 | validated |
| tarbase | hsa-miR-106b-5p | ASF1B    | 55723  | ENSG00000105011 | validated |
| tarbase | hsa-miR-212-3p  | TNNT1    | 7138   | ENSG00000105048 | validated |
| tarbase | hsa-miR-21-5p   | VRK3     | 51231  | ENSG00000105053 | validated |
| tarbase | hsa-miR-181a-5p | PPP6R1   | 22870  | ENSG00000105063 | validated |
| tarbase | hsa-miR-181a-5p | MED26    | 9441   | ENSG00000105085 | validated |
| tarbase | hsa-miR-181a-5p | ZNF419   | 79744  | ENSG00000105136 | validated |
| tarbase | hsa-miR-144-3p  | CASP14   | 23581  | ENSG00000105141 | validated |
| tarbase | hsa-miR-212-3p  | AURKC    | 6795   | ENSG00000105146 | validated |
| tarbase | hsa-miR-181a-5p | CCNE1    | 898    | ENSG00000105173 | validated |
| tarbase | hsa-miR-106b-5p | URI1     | 8725   | ENSG00000105176 | validated |
| tarbase | hsa-miR-181a-5p | URI1     | 8725   | ENSG00000105176 | validated |
| tarbase | hsa-miR-18a-5p  | URI1     | 8725   | ENSG00000105176 | validated |
| tarbase | hsa-miR-301a-3p | URI1     | 8725   | ENSG00000105176 | validated |
| tarbase | hsa-miR-582-5p  | URI1     | 8725   | ENSG00000105176 | validated |
| tarbase | hsa-miR-192-5p  | ANKRD27  | 84079  | ENSG00000105186 | validated |
| tarbase | hsa-miR-21-5p   | ANKRD27  | 84079  | ENSG00000105186 | validated |
| tarbase | hsa-miR-181a-5p | FBL      | 2091   | ENSG00000105202 | validated |
| tarbase | hsa-miR-18a-5p  | FBL      | 2091   | ENSG00000105202 | validated |
| tarbase | hsa-miR-15b-5p  | DYRK1B   | 9149   | ENSG00000105204 | validated |
| tarbase | hsa-miR-296-5p  | DYRK1B   | 9149   | ENSG00000105204 | validated |
| tarbase | hsa-miR-326     | GPI      | 2821   | ENSG00000105220 | validated |
| tarbase | hsa-miR-326     | PIAS4    | 51588  | ENSG00000105229 | validated |
| tarbase | hsa-miR-582-5p  | FSD1     | 79187  | ENSG00000105255 | validated |
| tarbase | hsa-miR-18a-5p  | CLIP3    | 25999  | ENSG00000105270 | validated |
| tarbase | hsa-miR-301a-3p | ZFR2     | 23217  | ENSG00000105278 | validated |
| tarbase | hsa-miR-192-5p  | SLC1A5   | 6510   | ENSG00000105281 | validated |
| tarbase | hsa-miR-296-5p  | SLC1A5   | 6510   | ENSG00000105281 | validated |
| tarbase | hsa-miR-15b-5p  | APLP1    | 333    | ENSG00000105290 | validated |
| tarbase | hsa-miR-106b-5p | HNRNPUL1 | 11100  | ENSG00000105323 | validated |
| tarbase | hsa-miR-301a-3p | HNRNPUL1 | 11100  | ENSG00000105323 | validated |
| tarbase | hsa-miR-301a-3p | BBC3     | 27113  | ENSG00000105327 | validated |
| tarbase | hsa-miR-106b-5p | DMAC2    | 55101  | ENSG00000105341 | validated |
| tarbase | hsa-miR-296-5p  | MYH14    | 79784  | ENSG00000105357 | validated |
| tarbase | hsa-miR-212-3p  | CD33     | 945    | ENSG00000105383 | validated |
| tarbase | hsa-miR-18a-5p  | BABAM1   | 29086  | ENSG00000105393 | validated |
| tarbase | hsa-miR-582-3p  | BABAM1   | 29086  | ENSG00000105393 | validated |
| tarbase | hsa-miR-192-5p  | NAPA     | 8775   | ENSG00000105402 | validated |
| tarbase | hsa-miR-212-3p  | RABAC1   | 10567  | ENSG00000105404 | validated |
| tarbase | hsa-miR-106b-5p | GRWD1    | 83743  | ENSG00000105447 | validated |
| tarbase | hsa-miR-106b-5p | CARD8    | 22900  | ENSG00000105483 | validated |
| tarbase | hsa-miR-181a-5p | ZNF175   | 7728   | ENSG00000105497 | validated |
| tarbase | hsa-miR-212-3p  | PLA2G4C  | 8605   | ENSG00000105499 | validated |
| tarbase | hsa-miR-192-5p  | RAB3D    | 9545   | ENSG00000105514 | validated |
| tarbase | hsa-miR-18a-5p  | TMEM205  | 374882 | ENSG00000105518 | validated |
| tarbase | hsa-miR-106b-5p | PPP2R1A  | 5518   | ENSG00000105568 | validated |
| tarbase | hsa-miR-15b-5p  | PPP2R1A  | 5518   | ENSG00000105568 | validated |
| tarbase | hsa-miR-15b-5p  | TNPO2    | 30000  | ENSG00000105576 | validated |
| tarbase | hsa-miR-18a-5p  | TNPO2    | 30000  | ENSG00000105576 | validated |
| tarbase | hsa-miR-222-3p  | TNPO2    | 30000  | ENSG00000105576 | validated |
| tarbase | hsa-miR-296-5p  | TNPO2    | 30000  | ENSG00000105576 | validated |
| tarbase | hsa-miR-222-3p  | JAK3     | 3718   | ENSG00000105639 | validated |
| tarbase | hsa-miR-296-5p  | PIK3R2   | 5296   | ENSG00000105647 | validated |
| tarbase | hsa-miR-301a-3p | PIK3R2   | 5296   | ENSG00000105647 | validated |
| tarbase | hsa-miR-15b-5p  | ISYNA1   | 51477  | ENSG00000105655 | validated |
| tarbase | hsa-miR-296-5p  | ISYNA1   | 51477  | ENSG00000105655 | validated |
| tarbase | hsa-miR-15b-5p  | ELL      | 8178   | ENSG00000105656 | validated |
| tarbase | hsa-miR-326     | COPE     | 11316  | ENSG00000105669 | validated |
| tarbase | hsa-miR-212-3p  | COPE     | 11316  | ENSG00000105669 | validated |
| tarbase | hsa-miR-212-3p  | ETV2     | 2116   | ENSG00000105672 | validated |
| tarbase | hsa-miR-106b-5p | USF2     | 7392   | ENSG00000105698 | validated |
| tarbase | hsa-miR-15b-5p  | LSR      | 51599  | ENSG00000105699 | validated |
| tarbase | hsa-miR-144-3p  | FKBP8    | 23770  | ENSG00000105701 | validated |
| tarbase | hsa-miR-181a-5p | ZNF14    | 7561   | ENSG00000105708 | validated |
| tarbase | hsa-miR-21-5p   | ERF      | 2077   | ENSG00000105722 | validated |
| tarbase | hsa-miR-192-5p  | GSK3A    | 2931   | ENSG00000105723 | validated |
| tarbase | hsa-miR-15b-5p  | SIPA1L3  | 23094  | ENSG00000105738 | validated |

|         |                 |         |        |                 |           |
|---------|-----------------|---------|--------|-----------------|-----------|
| tarbase | hsa-miR-18a-5p  | ZNF85   | 7639   | ENSG00000105750 | validated |
| tarbase | hsa-miR-21-5p   | SMG9    | 56006  | ENSG00000105771 | validated |
| tarbase | hsa-miR-181a-5p | AVL9    | 23080  | ENSG00000105778 | validated |
| tarbase | hsa-miR-212-3p  | AVL9    | 23080  | ENSG00000105778 | validated |
| tarbase | hsa-miR-21-5p   | AVL9    | 23080  | ENSG00000105778 | validated |
| tarbase | hsa-miR-212-3p  | RUNDC3B | 154661 | ENSG00000105784 | validated |
| tarbase | hsa-miR-582-3p  | GTPBP10 | 85865  | ENSG00000105793 | validated |
| tarbase | hsa-miR-212-3p  | CDK6    | 1021   | ENSG00000105810 | validated |
| tarbase | hsa-miR-582-3p  | CDK6    | 1021   | ENSG00000105810 | validated |
| tarbase | hsa-miR-582-5p  | CDK6    | 1021   | ENSG00000105810 | validated |
| tarbase | hsa-miR-181a-5p | PMPCB   | 9512   | ENSG00000105819 | validated |
| tarbase | hsa-miR-582-5p  | DNAJC2  | 27000  | ENSG00000105821 | validated |
| tarbase | hsa-miR-212-3p  | TFPI2   | 7980   | ENSG00000105825 | validated |
| tarbase | hsa-miR-15b-5p  | TWISTNB | 221830 | ENSG00000105849 | validated |
| tarbase | hsa-miR-181a-5p | TWISTNB | 221830 | ENSG00000105849 | validated |
| tarbase | hsa-miR-326     | TWISTNB | 221830 | ENSG00000105849 | validated |
| tarbase | hsa-miR-106b-5p | ITGB8   | 3696   | ENSG00000105855 | validated |
| tarbase | hsa-miR-301a-3p | ITGB8   | 3696   | ENSG00000105855 | validated |
| tarbase | hsa-miR-181a-5p | ITGB8   | 3696   | ENSG00000105855 | validated |
| tarbase | hsa-miR-15b-5p  | HBP1    | 26959  | ENSG00000105856 | validated |
| tarbase | hsa-miR-21-5p   | HBP1    | 26959  | ENSG00000105856 | validated |
| tarbase | hsa-miR-582-3p  | SP4     | 6671   | ENSG00000105866 | validated |
| tarbase | hsa-miR-21-5p   | CBLL1   | 79872  | ENSG00000105879 | validated |
| tarbase | hsa-miR-582-3p  | CBLL1   | 79872  | ENSG00000105879 | validated |
| tarbase | hsa-miR-106b-5p | MTPN    | 136319 | ENSG00000105887 | validated |
| tarbase | hsa-miR-181a-5p | MTPN    | 136319 | ENSG00000105887 | validated |
| tarbase | hsa-miR-18a-5p  | MTPN    | 136319 | ENSG00000105887 | validated |
| tarbase | hsa-miR-582-5p  | MTPN    | 136319 | ENSG00000105887 | validated |
| tarbase | hsa-miR-212-3p  | MTPN    | 136319 | ENSG00000105887 | validated |
| tarbase | hsa-miR-18a-5p  | MPP6    | 51678  | ENSG00000105926 | validated |
| tarbase | hsa-miR-18a-5p  | ZC3HAV1 | 56829  | ENSG00000105939 | validated |
| tarbase | hsa-miR-212-3p  | ZC3HAV1 | 56829  | ENSG00000105939 | validated |
| tarbase | hsa-miR-212-3p  | TTC26   | 79989  | ENSG00000105948 | validated |
| tarbase | hsa-miR-181a-5p | OGDH    | 4967   | ENSG00000105953 | validated |
| tarbase | hsa-miR-15b-5p  | H2AZ2   | 94239  | ENSG00000105968 | validated |
| tarbase | hsa-miR-181a-5p | H2AZ2   | 94239  | ENSG00000105968 | validated |
| tarbase | hsa-miR-222-3p  | CAV2    | 858    | ENSG00000105971 | validated |
| tarbase | hsa-miR-301a-3p | CAV2    | 858    | ENSG00000105971 | validated |
| tarbase | hsa-miR-582-3p  | CAV1    | 857    | ENSG00000105974 | validated |
| tarbase | hsa-miR-181a-5p | MET     | 4233   | ENSG00000105976 | validated |
| tarbase | hsa-miR-301a-3p | MET     | 4233   | ENSG00000105976 | validated |
| tarbase | hsa-miR-222-3p  | MET     | 4233   | ENSG00000105976 | validated |
| tarbase | hsa-miR-106b-5p | LMBR1   | 64327  | ENSG00000105983 | validated |
| tarbase | hsa-miR-212-3p  | LMBR1   | 64327  | ENSG00000105983 | validated |
| tarbase | hsa-miR-301a-3p | LMBR1   | 64327  | ENSG00000105983 | validated |
| tarbase | hsa-miR-582-3p  | HOXA1   | 3198   | ENSG00000105991 | validated |
| tarbase | hsa-miR-212-3p  | HOXA1   | 3198   | ENSG00000105991 | validated |
| tarbase | hsa-miR-301a-3p | HOXA3   | 3200   | ENSG00000105997 | validated |
| tarbase | hsa-miR-212-3p  | HOXA3   | 3200   | ENSG00000105997 | validated |
| tarbase | hsa-miR-15b-5p  | LFNG    | 3955   | ENSG00000106003 | validated |
| tarbase | hsa-miR-582-5p  | HOXA5   | 3202   | ENSG00000106004 | validated |
| tarbase | hsa-miR-222-3p  | HOXA5   | 3202   | ENSG00000106004 | validated |
| tarbase | hsa-miR-106b-5p | HOXA6   | 3203   | ENSG00000106006 | validated |
| tarbase | hsa-miR-212-3p  | IQCE    | 23288  | ENSG00000106012 | validated |
| tarbase | hsa-miR-106b-5p | TSPAN12 | 23554  | ENSG00000106025 | validated |
| tarbase | hsa-miR-18a-5p  | TAX1BP1 | 8887   | ENSG00000106052 | validated |
| tarbase | hsa-miR-181a-5p | TAX1BP1 | 8887   | ENSG00000106052 | validated |
| tarbase | hsa-miR-212-3p  | GRB10   | 2887   | ENSG00000106070 | validated |
| tarbase | hsa-miR-181a-5p | PLEKHA8 | 84725  | ENSG00000106086 | validated |
| tarbase | hsa-miR-212-3p  | PLEKHA8 | 84725  | ENSG00000106086 | validated |
| tarbase | hsa-miR-296-5p  | PLEKHA8 | 84725  | ENSG00000106086 | validated |
| tarbase | hsa-miR-106b-5p | GARS1   | 2617   | ENSG00000106105 | validated |
| tarbase | hsa-miR-15b-5p  | GARS1   | 2617   | ENSG00000106105 | validated |
| tarbase | hsa-miR-181a-5p | GARS1   | 2617   | ENSG00000106105 | validated |
| tarbase | hsa-miR-212-3p  | GARS1   | 2617   | ENSG00000106105 | validated |
| tarbase | hsa-miR-18a-5p  | CASP2   | 835    | ENSG00000106144 | validated |
| tarbase | hsa-miR-21-5p   | CASP2   | 835    | ENSG00000106144 | validated |
| tarbase | hsa-miR-212-3p  | HSPB1   | 3315   | ENSG00000106211 | validated |
| tarbase | hsa-miR-15b-5p  | NPTX2   | 4885   | ENSG00000106236 | validated |
| tarbase | hsa-miR-181a-5p | PTCD1   | 26024  | ENSG00000106246 | validated |
| tarbase | hsa-miR-106b-5p | ZKSCAN1 | 7586   | ENSG00000106261 | validated |

|         |                 |          |        |                 |           |
|---------|-----------------|----------|--------|-----------------|-----------|
| tarbase | hsa-miR-144-3p  | ZKSCAN1  | 7586   | ENSG00000106261 | validated |
| tarbase | hsa-miR-181a-5p | ZKSCAN1  | 7586   | ENSG00000106261 | validated |
| tarbase | hsa-miR-192-5p  | ZKSCAN1  | 7586   | ENSG00000106261 | validated |
| tarbase | hsa-miR-21-5p   | ZKSCAN1  | 7586   | ENSG00000106261 | validated |
| tarbase | hsa-miR-301a-3p | ZKSCAN1  | 7586   | ENSG00000106261 | validated |
| tarbase | hsa-miR-21-5p   | EIF3B    | 8662   | ENSG00000106263 | validated |
| tarbase | hsa-miR-192-5p  | TAF6     | 6878   | ENSG00000106290 | validated |
| tarbase | hsa-miR-181a-5p | WASL     | 8976   | ENSG00000106299 | validated |
| tarbase | hsa-miR-18a-5p  | WASL     | 8976   | ENSG00000106299 | validated |
| tarbase | hsa-miR-582-5p  | WASL     | 8976   | ENSG00000106299 | validated |
| tarbase | hsa-miR-106b-5p | AIMP2    | 7965   | ENSG00000106305 | validated |
| tarbase | hsa-miR-106b-5p | RBM28    | 55131  | ENSG00000106344 | validated |
| tarbase | hsa-miR-582-5p  | USP42    | 84132  | ENSG00000106346 | validated |
| tarbase | hsa-miR-181a-5p | USP42    | 84132  | ENSG00000106346 | validated |
| tarbase | hsa-miR-222-3p  | AGFG2    | 3268   | ENSG00000106351 | validated |
| tarbase | hsa-miR-181a-5p | SERPINE1 | 5054   | ENSG00000106366 | validated |
| tarbase | hsa-miR-326     | AP1S1    | 1174   | ENSG00000106367 | validated |
| tarbase | hsa-miR-301a-3p | ZNHIT1   | 10467  | ENSG00000106400 | validated |
| tarbase | hsa-miR-296-5p  | CLDN15   | 24146  | ENSG00000106404 | validated |
| tarbase | hsa-miR-144-3p  | GLCCI1   | 113263 | ENSG00000106415 | validated |
| tarbase | hsa-miR-181a-5p | GLCCI1   | 113263 | ENSG00000106415 | validated |
| tarbase | hsa-miR-582-5p  | GLCCI1   | 113263 | ENSG00000106415 | validated |
| tarbase | hsa-miR-582-3p  | TMEM106B | 54664  | ENSG00000106460 | validated |
| tarbase | hsa-miR-181a-5p | TMEM106B | 54664  | ENSG00000106460 | validated |
| tarbase | hsa-miR-181a-5p | CEP41    | 95681  | ENSG00000106477 | validated |
| tarbase | hsa-miR-181a-5p | MEST     | 4232   | ENSG00000106484 | validated |
| tarbase | hsa-miR-106b-5p | ANKMY2   | 57037  | ENSG00000106524 | validated |
| tarbase | hsa-miR-301a-3p | TSPAN13  | 27075  | ENSG00000106537 | validated |
| tarbase | hsa-miR-106b-5p | AHR      | 196    | ENSG00000106546 | validated |
| tarbase | hsa-miR-18a-5p  | AHR      | 196    | ENSG00000106546 | validated |
| tarbase | hsa-miR-21-5p   | CHCHD3   | 54927  | ENSG00000106554 | validated |
| tarbase | hsa-miR-301a-3p | CHCHD3   | 54927  | ENSG00000106554 | validated |
| tarbase | hsa-miR-21-5p   | URGCP    | 55665  | ENSG00000106608 | validated |
| tarbase | hsa-miR-301a-3p | URGCP    | 55665  | ENSG00000106608 | validated |
| tarbase | hsa-miR-505-3p  | URGCP    | 55665  | ENSG00000106608 | validated |
| tarbase | hsa-miR-18a-5p  | TMEM248  | 55069  | ENSG00000106609 | validated |
| tarbase | hsa-miR-222-3p  | TMEM248  | 55069  | ENSG00000106609 | validated |
| tarbase | hsa-miR-106b-5p | TMEM248  | 55069  | ENSG00000106609 | validated |
| tarbase | hsa-miR-192-5p  | CLIP2    | 7461   | ENSG00000106665 | validated |
| tarbase | hsa-miR-18a-5p  | LIMK1    | 3984   | ENSG00000106683 | validated |
| tarbase | hsa-miR-582-5p  | LIMK1    | 3984   | ENSG00000106683 | validated |
| tarbase | hsa-miR-15b-5p  | FKTN     | 2218   | ENSG00000106692 | validated |
| tarbase | hsa-miR-21-5p   | FKTN     | 2218   | ENSG00000106692 | validated |
| tarbase | hsa-miR-212-3p  | FSD1L    | 83856  | ENSG00000106701 | validated |
| tarbase | hsa-miR-181a-5p | SPIN1    | 10927  | ENSG00000106723 | validated |
| tarbase | hsa-miR-212-3p  | SPIN1    | 10927  | ENSG00000106723 | validated |
| tarbase | hsa-miR-144-3p  | TMEM245  | 23731  | ENSG00000106771 | validated |
| tarbase | hsa-miR-181a-5p | TMEM245  | 23731  | ENSG00000106771 | validated |
| tarbase | hsa-miR-301a-3p | TMEM245  | 23731  | ENSG00000106771 | validated |
| tarbase | hsa-miR-15b-5p  | MEGF9    | 1955   | ENSG00000106780 | validated |
| tarbase | hsa-miR-181a-5p | MEGF9    | 1955   | ENSG00000106780 | validated |
| tarbase | hsa-miR-212-3p  | TRIM14   | 9830   | ENSG00000106785 | validated |
| tarbase | hsa-miR-106b-5p | TGFBR1   | 7046   | ENSG00000106799 | validated |
| tarbase | hsa-miR-21-5p   | TGFBR1   | 7046   | ENSG00000106799 | validated |
| tarbase | hsa-miR-181a-5p | C5       | 727    | ENSG00000106804 | validated |
| tarbase | hsa-miR-505-3p  | TLE4     | 7091   | ENSG00000106829 | validated |
| tarbase | hsa-miR-106b-5p | SUSD1    | 64420  | ENSG00000106868 | validated |
| tarbase | hsa-miR-181a-5p | AKNA     | 80709  | ENSG00000106948 | validated |
| tarbase | hsa-miR-582-5p  | CDC37L1  | 55664  | ENSG00000106993 | validated |
| tarbase | hsa-miR-212-3p  | CDC37L1  | 55664  | ENSG00000106993 | validated |
| tarbase | hsa-miR-15b-5p  | TBC1D13  | 54662  | ENSG00000107021 | validated |
| tarbase | hsa-miR-301a-3p | TBC1D13  | 54662  | ENSG00000107021 | validated |
| tarbase | hsa-miR-582-3p  | TBC1D13  | 54662  | ENSG00000107021 | validated |
| tarbase | hsa-miR-106b-5p | RIC1     | 57589  | ENSG00000107036 | validated |
| tarbase | hsa-miR-144-3p  | RIC1     | 57589  | ENSG00000107036 | validated |
| tarbase | hsa-miR-15b-5p  | RIC1     | 57589  | ENSG00000107036 | validated |
| tarbase | hsa-miR-21-5p   | RIC1     | 57589  | ENSG00000107036 | validated |
| tarbase | hsa-miR-582-5p  | RIC1     | 57589  | ENSG00000107036 | validated |
| tarbase | hsa-miR-21-5p   | DOCK8    | 81704  | ENSG00000107099 | validated |
| tarbase | hsa-miR-181a-5p | KANK1    | 23189  | ENSG00000107104 | validated |
| tarbase | hsa-miR-15b-5p  | ELAVL2   | 1993   | ENSG00000107105 | validated |

|         |                 |           |        |                 |           |
|---------|-----------------|-----------|--------|-----------------|-----------|
| tarbase | hsa-miR-181a-5p | ELAVL2    | 1993   | ENSG00000107105 | validated |
| tarbase | hsa-miR-181a-5p | NCS1      | 23413  | ENSG00000107130 | validated |
| tarbase | hsa-miR-15b-5p  | CA9       | 768    | ENSG00000107159 | validated |
| tarbase | hsa-miR-21-5p   | MPDZ      | 8777   | ENSG00000107186 | validated |
| tarbase | hsa-miR-301a-3p | MPDZ      | 8777   | ENSG00000107186 | validated |
| tarbase | hsa-miR-326     | LHX3      | 8022   | ENSG00000107187 | validated |
| tarbase | hsa-miR-212-3p  | DDX58     | 23586  | ENSG00000107201 | validated |
| tarbase | hsa-miR-106b-5p | RAPGEF1   | 2889   | ENSG00000107263 | validated |
| tarbase | hsa-miR-15b-5p  | RAPGEF1   | 2889   | ENSG00000107263 | validated |
| tarbase | hsa-miR-21-5p   | RAPGEF1   | 2889   | ENSG00000107263 | validated |
| tarbase | hsa-miR-296-5p  | NPDC1     | 56654  | ENSG00000107281 | validated |
| tarbase | hsa-miR-301a-3p | NPDC1     | 56654  | ENSG00000107281 | validated |
| tarbase | hsa-miR-326     | NPDC1     | 56654  | ENSG00000107281 | validated |
| tarbase | hsa-miR-106b-5p | SETX      | 23064  | ENSG00000107290 | validated |
| tarbase | hsa-miR-15b-5p  | SETX      | 23064  | ENSG00000107290 | validated |
| tarbase | hsa-miR-21-5p   | SETX      | 23064  | ENSG00000107290 | validated |
| tarbase | hsa-miR-181a-5p | SETX      | 23064  | ENSG00000107290 | validated |
| tarbase | hsa-miR-15b-5p  | UBE2R2    | 54926  | ENSG00000107341 | validated |
| tarbase | hsa-miR-18a-5p  | UBE2R2    | 54926  | ENSG00000107341 | validated |
| tarbase | hsa-miR-212-3p  | UBE2R2    | 54926  | ENSG00000107341 | validated |
| tarbase | hsa-miR-106b-5p | ABHD17B   | 51104  | ENSG00000107362 | validated |
| tarbase | hsa-miR-15b-5p  | ABHD17B   | 51104  | ENSG00000107362 | validated |
| tarbase | hsa-miR-181a-5p | EXOSC3    | 51010  | ENSG00000107371 | validated |
| tarbase | hsa-miR-181a-5p | ZFAND5    | 7763   | ENSG00000107372 | validated |
| tarbase | hsa-miR-15b-5p  | CCNJ      | 54619  | ENSG00000107443 | validated |
| tarbase | hsa-miR-181a-5p | CCNJ      | 54619  | ENSG00000107443 | validated |
| tarbase | hsa-miR-222-3p  | CCNJ      | 54619  | ENSG00000107443 | validated |
| tarbase | hsa-miR-582-5p  | CCNJ      | 54619  | ENSG00000107443 | validated |
| tarbase | hsa-miR-15b-5p  | GATA3     | 2625   | ENSG00000107485 | validated |
| tarbase | hsa-miR-21-5p   | GATA3     | 2625   | ENSG00000107485 | validated |
| tarbase | hsa-miR-18a-5p  | ATRNL1    | 26033  | ENSG00000107518 | validated |
| tarbase | hsa-miR-181a-5p | ATRNL1    | 26033  | ENSG00000107518 | validated |
| tarbase | hsa-miR-222-3p  | ATRNL1    | 26033  | ENSG00000107518 | validated |
| tarbase | hsa-miR-326     | HPS1      | 3257   | ENSG00000107521 | validated |
| tarbase | hsa-miR-181a-5p | PHYH      | 5264   | ENSG00000107537 | validated |
| tarbase | hsa-miR-222-3p  | RAB11FIP2 | 22841  | ENSG00000107560 | validated |
| tarbase | hsa-miR-582-3p  | RAB11FIP2 | 22841  | ENSG00000107560 | validated |
| tarbase | hsa-miR-144-3p  | CXCL12    | 6387   | ENSG00000107562 | validated |
| tarbase | hsa-miR-15b-5p  | ERLIN1    | 10613  | ENSG00000107566 | validated |
| tarbase | hsa-miR-18a-5p  | ERLIN1    | 10613  | ENSG00000107566 | validated |
| tarbase | hsa-miR-222-3p  | ERLIN1    | 10613  | ENSG00000107566 | validated |
| tarbase | hsa-miR-15b-5p  | EIF3A     | 8661   | ENSG00000107581 | validated |
| tarbase | hsa-miR-296-5p  | EIF3A     | 8661   | ENSG00000107581 | validated |
| tarbase | hsa-miR-21-5p   | DDX50     | 79009  | ENSG00000107625 | validated |
| tarbase | hsa-miR-106b-5p | MAPK8     | 5599   | ENSG00000107643 | validated |
| tarbase | hsa-miR-15b-5p  | MAPK8     | 5599   | ENSG00000107643 | validated |
| tarbase | hsa-miR-18a-5p  | MAPK8     | 5599   | ENSG00000107643 | validated |
| tarbase | hsa-miR-106b-5p | SEC23IP   | 11196  | ENSG00000107651 | validated |
| tarbase | hsa-miR-15b-5p  | SEC23IP   | 11196  | ENSG00000107651 | validated |
| tarbase | hsa-miR-106b-5p | ATE1      | 11101  | ENSG00000107669 | validated |
| tarbase | hsa-miR-181a-5p | PLEKHA1   | 59338  | ENSG00000107679 | validated |
| tarbase | hsa-miR-582-3p  | PLEKHA1   | 59338  | ENSG00000107679 | validated |
| tarbase | hsa-miR-582-5p  | PLEKHA1   | 59338  | ENSG00000107679 | validated |
| tarbase | hsa-miR-15b-5p  | UNC5B     | 219699 | ENSG00000107731 | validated |
| tarbase | hsa-miR-582-3p  | PPP3CB    | 5532   | ENSG00000107758 | validated |
| tarbase | hsa-miR-181a-5p | PPP3CB    | 5532   | ENSG00000107758 | validated |
| tarbase | hsa-miR-21-5p   | CCSER2    | 54462  | ENSG00000107771 | validated |
| tarbase | hsa-miR-181a-5p | CCSER2    | 54462  | ENSG00000107771 | validated |
| tarbase | hsa-miR-106b-5p | LIPA      | 3988   | ENSG00000107798 | validated |
| tarbase | hsa-miR-222-3p  | TWINK     | 56652  | ENSG00000107815 | validated |
| tarbase | hsa-miR-582-5p  | LZTS2     | 84445  | ENSG00000107816 | validated |
| tarbase | hsa-miR-181a-5p | SFXN3     | 81855  | ENSG00000107819 | validated |
| tarbase | hsa-miR-582-3p  | FBXW4     | 6468   | ENSG00000107829 | validated |
| tarbase | hsa-miR-144-3p  | TNKS2     | 80351  | ENSG00000107854 | validated |
| tarbase | hsa-miR-15b-5p  | TNKS2     | 80351  | ENSG00000107854 | validated |
| tarbase | hsa-miR-18a-5p  | TNKS2     | 80351  | ENSG00000107854 | validated |
| tarbase | hsa-miR-222-3p  | TNKS2     | 80351  | ENSG00000107854 | validated |
| tarbase | hsa-miR-21-5p   | TNKS2     | 80351  | ENSG00000107854 | validated |
| tarbase | hsa-miR-15b-5p  | GBF1      | 8729   | ENSG00000107862 | validated |
| tarbase | hsa-miR-326     | GBF1      | 8729   | ENSG00000107862 | validated |
| tarbase | hsa-miR-212-3p  | FBXL15    | 79176  | ENSG00000107872 | validated |



|         |                 |          |        |                 |           |
|---------|-----------------|----------|--------|-----------------|-----------|
| tarbase | hsa-miR-326     | CUEDC2   | 79004  | ENSG00000107874 | validated |
| tarbase | hsa-miR-106b-5p | SUFU     | 51684  | ENSG00000107882 | validated |
| tarbase | hsa-miR-21-5p   | ANKRD26  | 22852  | ENSG00000107890 | validated |
| tarbase | hsa-miR-15b-5p  | ANKRD26  | 22852  | ENSG00000107890 | validated |
| tarbase | hsa-miR-212-3p  | ANKRD26  | 22852  | ENSG00000107890 | validated |
| tarbase | hsa-miR-15b-5p  | ACBD5    | 91452  | ENSG00000107897 | validated |
| tarbase | hsa-miR-212-3p  | LHPP     | 64077  | ENSG00000107902 | validated |
| tarbase | hsa-miR-15b-5p  | LARP4B   | 23185  | ENSG00000107929 | validated |
| tarbase | hsa-miR-181a-5p | LARP4B   | 23185  | ENSG00000107929 | validated |
| tarbase | hsa-miR-18a-5p  | LARP4B   | 23185  | ENSG00000107929 | validated |
| tarbase | hsa-miR-222-3p  | LARP4B   | 23185  | ENSG00000107929 | validated |
| tarbase | hsa-miR-301a-3p | LARP4B   | 23185  | ENSG00000107929 | validated |
| tarbase | hsa-miR-582-5p  | LARP4B   | 23185  | ENSG00000107929 | validated |
| tarbase | hsa-miR-505-3p  | GTPBP4   | 23560  | ENSG00000107937 | validated |
| tarbase | hsa-miR-21-5p   | BCCIP    | 56647  | ENSG00000107949 | validated |
| tarbase | hsa-miR-18a-5p  | MTPAP    | 55149  | ENSG00000107951 | validated |
| tarbase | hsa-miR-106b-5p | SH3PXD2A | 9644   | ENSG00000107957 | validated |
| tarbase | hsa-miR-326     | SH3PXD2A | 9644   | ENSG00000107957 | validated |
| tarbase | hsa-miR-106b-5p | MAP3K8   | 1326   | ENSG00000107968 | validated |
| tarbase | hsa-miR-181a-5p | MAP3K8   | 1326   | ENSG00000107968 | validated |
| tarbase | hsa-miR-212-3p  | DKK1     | 22943  | ENSG00000107984 | validated |
| tarbase | hsa-miR-582-3p  | DKK1     | 22943  | ENSG00000107984 | validated |
| tarbase | hsa-miR-15b-5p  | TASOR2   | 54906  | ENSG00000108021 | validated |
| tarbase | hsa-miR-181a-5p | TASOR2   | 54906  | ENSG00000108021 | validated |
| tarbase | hsa-miR-18a-5p  | TASOR2   | 54906  | ENSG00000108021 | validated |
| tarbase | hsa-miR-21-5p   | TASOR2   | 54906  | ENSG00000108021 | validated |
| tarbase | hsa-miR-582-3p  | TASOR2   | 54906  | ENSG00000108021 | validated |
| tarbase | hsa-miR-144-3p  | SMC3     | 9126   | ENSG00000108055 | validated |
| tarbase | hsa-miR-15b-5p  | SMC3     | 9126   | ENSG00000108055 | validated |
| tarbase | hsa-miR-296-5p  | SMC3     | 9126   | ENSG00000108055 | validated |
| tarbase | hsa-miR-582-5p  | SMC3     | 9126   | ENSG00000108055 | validated |
| tarbase | hsa-miR-301a-3p | SHOC2    | 8036   | ENSG00000108061 | validated |
| tarbase | hsa-miR-15b-5p  | TFAM     | 7019   | ENSG00000108064 | validated |
| tarbase | hsa-miR-21-5p   | CCDC6    | 8030   | ENSG00000108091 | validated |
| tarbase | hsa-miR-301a-3p | CCDC6    | 8030   | ENSG00000108091 | validated |
| tarbase | hsa-miR-21-5p   | CUL2     | 8453   | ENSG00000108094 | validated |
| tarbase | hsa-miR-181a-5p | CCNY     | 219771 | ENSG00000108100 | validated |
| tarbase | hsa-miR-582-5p  | CCNY     | 219771 | ENSG00000108100 | validated |
| tarbase | hsa-miR-296-5p  | RPL28    | 6158   | ENSG00000108107 | validated |
| tarbase | hsa-miR-326     | RPL28    | 6158   | ENSG00000108107 | validated |
| tarbase | hsa-miR-582-3p  | RPL28    | 6158   | ENSG00000108107 | validated |
| tarbase | hsa-miR-181a-5p | ZMIZ1    | 57178  | ENSG00000108175 | validated |
| tarbase | hsa-miR-15b-5p  | PPIF     | 10105  | ENSG00000108179 | validated |
| tarbase | hsa-miR-18a-5p  | PPIF     | 10105  | ENSG00000108179 | validated |
| tarbase | hsa-miR-301a-3p | PPIF     | 10105  | ENSG00000108179 | validated |
| tarbase | hsa-miR-106b-5p | PPIF     | 10105  | ENSG00000108179 | validated |
| tarbase | hsa-miR-15b-5p  | TSPAN14  | 81619  | ENSG00000108219 | validated |
| tarbase | hsa-miR-212-3p  | KRT23    | 25984  | ENSG00000108244 | validated |
| tarbase | hsa-miR-144-3p  | NUFIP2   | 57532  | ENSG00000108256 | validated |
| tarbase | hsa-miR-18a-5p  | NUFIP2   | 57532  | ENSG00000108256 | validated |
| tarbase | hsa-miR-212-3p  | NUFIP2   | 57532  | ENSG00000108256 | validated |
| tarbase | hsa-miR-301a-3p | NUFIP2   | 57532  | ENSG00000108256 | validated |
| tarbase | hsa-miR-326     | NUFIP2   | 57532  | ENSG00000108256 | validated |
| tarbase | hsa-miR-181a-5p | NUFIP2   | 57532  | ENSG00000108256 | validated |
| tarbase | hsa-miR-222-3p  | NUFIP2   | 57532  | ENSG00000108256 | validated |
| tarbase | hsa-miR-15b-5p  | RPL19    | 6143   | ENSG00000108298 | validated |
| tarbase | hsa-miR-21-5p   | RPL19    | 6143   | ENSG00000108298 | validated |
| tarbase | hsa-miR-18a-5p  | UBTF     | 7343   | ENSG00000108312 | validated |
| tarbase | hsa-miR-301a-3p | UBTF     | 7343   | ENSG00000108312 | validated |
| tarbase | hsa-miR-181a-5p | PSMD3    | 5709   | ENSG00000108344 | validated |
| tarbase | hsa-miR-106b-5p | RAPGEFL1 | 51195  | ENSG00000108352 | validated |
| tarbase | hsa-miR-15b-5p  | RNF43    | 54894  | ENSG00000108375 | validated |
| tarbase | hsa-miR-15b-5p  | RAD51C   | 5889   | ENSG00000108384 | validated |
| tarbase | hsa-miR-18a-5p  | RAD51C   | 5889   | ENSG00000108384 | validated |
| tarbase | hsa-miR-301a-3p | RAD51C   | 5889   | ENSG00000108384 | validated |
| tarbase | hsa-miR-18a-5p  | MTMR4    | 9110   | ENSG00000108389 | validated |
| tarbase | hsa-miR-301a-3p | MTMR4    | 9110   | ENSG00000108389 | validated |
| tarbase | hsa-miR-15b-5p  | TRIM37   | 4591   | ENSG00000108395 | validated |
| tarbase | hsa-miR-106b-5p | TUBD1    | 51174  | ENSG00000108423 | validated |
| tarbase | hsa-miR-15b-5p  | KPNB1    | 3837   | ENSG00000108424 | validated |
| tarbase | hsa-miR-181a-5p | KPNB1    | 3837   | ENSG00000108424 | validated |

|         |                 |          |       |                 |           |
|---------|-----------------|----------|-------|-----------------|-----------|
| tarbase | hsa-miR-18a-5p  | KPNB1    | 3837  | ENSG00000108424 | validated |
| tarbase | hsa-miR-326     | KPNB1    | 3837  | ENSG00000108424 | validated |
| tarbase | hsa-miR-212-3p  | PNPO     | 55163 | ENSG00000108439 | validated |
| tarbase | hsa-miR-301a-3p | RPS6KB1  | 6198  | ENSG00000108443 | validated |
| tarbase | hsa-miR-212-3p  | CBX1     | 10951 | ENSG00000108468 | validated |
| tarbase | hsa-miR-326     | RECQL5   | 9400  | ENSG00000108469 | validated |
| tarbase | hsa-miR-15b-5p  | CAMTA2   | 23125 | ENSG00000108509 | validated |
| tarbase | hsa-miR-181a-5p | CAMTA2   | 23125 | ENSG00000108509 | validated |
| tarbase | hsa-miR-106b-5p | MED13    | 9969  | ENSG00000108510 | validated |
| tarbase | hsa-miR-15b-5p  | MED13    | 9969  | ENSG00000108510 | validated |
| tarbase | hsa-miR-181a-5p | MED13    | 9969  | ENSG00000108510 | validated |
| tarbase | hsa-miR-192-5p  | MED13    | 9969  | ENSG00000108510 | validated |
| tarbase | hsa-miR-212-3p  | MED13    | 9969  | ENSG00000108510 | validated |
| tarbase | hsa-miR-21-5p   | MED13    | 9969  | ENSG00000108510 | validated |
| tarbase | hsa-miR-301a-3p | MED13    | 9969  | ENSG00000108510 | validated |
| tarbase | hsa-miR-505-3p  | MED13    | 9969  | ENSG00000108510 | validated |
| tarbase | hsa-miR-212-3p  | HOXB6    | 3216  | ENSG00000108511 | validated |
| tarbase | hsa-miR-106b-5p | PFN1     | 5216  | ENSG00000108518 | validated |
| tarbase | hsa-miR-106b-5p | RASD1    | 51655 | ENSG00000108551 | validated |
| tarbase | hsa-miR-15b-5p  | RAI1     | 10743 | ENSG00000108557 | validated |
| tarbase | hsa-miR-222-3p  | NUP88    | 4927  | ENSG00000108559 | validated |
| tarbase | hsa-miR-106b-5p | C1QBP    | 708   | ENSG00000108561 | validated |
| tarbase | hsa-miR-15b-5p  | C1QBP    | 708   | ENSG00000108561 | validated |
| tarbase | hsa-miR-181a-5p | BLMH     | 642   | ENSG00000108578 | validated |
| tarbase | hsa-miR-181a-5p | CPD      | 1362  | ENSG00000108582 | validated |
| tarbase | hsa-miR-18a-5p  | CPD      | 1362  | ENSG00000108582 | validated |
| tarbase | hsa-miR-505-3p  | CPD      | 1362  | ENSG00000108582 | validated |
| tarbase | hsa-miR-15b-5p  | CPD      | 1362  | ENSG00000108582 | validated |
| tarbase | hsa-miR-15b-5p  | CCDC47   | 57003 | ENSG00000108588 | validated |
| tarbase | hsa-miR-106b-5p | AKAP10   | 11216 | ENSG00000108599 | validated |
| tarbase | hsa-miR-15b-5p  | AKAP10   | 11216 | ENSG00000108599 | validated |
| tarbase | hsa-miR-181a-5p | SMARCD2  | 6603  | ENSG00000108604 | validated |
| tarbase | hsa-miR-296-5p  | SMARCD2  | 6603  | ENSG00000108604 | validated |
| tarbase | hsa-miR-301a-3p | SMARCD2  | 6603  | ENSG00000108604 | validated |
| tarbase | hsa-miR-181a-5p | DDX5     | 1655  | ENSG00000108654 | validated |
| tarbase | hsa-miR-301a-3p | DDX5     | 1655  | ENSG00000108654 | validated |
| tarbase | hsa-miR-212-3p  | C17orf75 | 64149 | ENSG00000108666 | validated |
| tarbase | hsa-miR-296-5p  | LGALS3BP | 3959  | ENSG00000108679 | validated |
| tarbase | hsa-miR-212-3p  | LGALS3BP | 3959  | ENSG00000108679 | validated |
| tarbase | hsa-miR-212-3p  | CCL8     | 6355  | ENSG00000108700 | validated |
| tarbase | hsa-miR-582-3p  | KAT2A    | 2648  | ENSG00000108773 | validated |
| tarbase | hsa-miR-301a-3p | RAB5C    | 5878  | ENSG00000108774 | validated |
| tarbase | hsa-miR-15b-5p  | CNTNAP1  | 8506  | ENSG00000108797 | validated |
| tarbase | hsa-miR-326     | EZH1     | 2145  | ENSG00000108799 | validated |
| tarbase | hsa-miR-582-5p  | PPP1R9B  | 84687 | ENSG00000108819 | validated |
| tarbase | hsa-miR-181a-5p | COL1A1   | 1277  | ENSG00000108821 | validated |
| tarbase | hsa-miR-15b-5p  | LRRRC59  | 55379 | ENSG00000108829 | validated |
| tarbase | hsa-miR-18a-5p  | LRRRC59  | 55379 | ENSG00000108829 | validated |
| tarbase | hsa-miR-21-5p   | LRRRC59  | 55379 | ENSG00000108829 | validated |
| tarbase | hsa-miR-212-3p  | RND2     | 8153  | ENSG00000108830 | validated |
| tarbase | hsa-miR-18a-5p  | HDAC5    | 10014 | ENSG00000108840 | validated |
| tarbase | hsa-miR-15b-5p  | ABCC3    | 8714  | ENSG00000108846 | validated |
| tarbase | hsa-miR-212-3p  | LUC7L3   | 51747 | ENSG00000108848 | validated |
| tarbase | hsa-miR-15b-5p  | MPP2     | 4355  | ENSG00000108852 | validated |
| tarbase | hsa-miR-192-5p  | MPP2     | 4355  | ENSG00000108852 | validated |
| tarbase | hsa-miR-15b-5p  | SMURF2   | 64750 | ENSG00000108854 | validated |
| tarbase | hsa-miR-18a-5p  | DUSP3    | 1845  | ENSG00000108861 | validated |
| tarbase | hsa-miR-18a-5p  | EFTUD2   | 9343  | ENSG00000108883 | validated |
| tarbase | hsa-miR-326     | EFTUD2   | 9343  | ENSG00000108883 | validated |
| tarbase | hsa-miR-181a-5p | HLF      | 3131  | ENSG00000108924 | validated |
| tarbase | hsa-miR-212-3p  | HLF      | 3131  | ENSG00000108924 | validated |
| tarbase | hsa-miR-18a-5p  | SLC16A6  | 9120  | ENSG00000108932 | validated |
| tarbase | hsa-miR-222-3p  | SLC16A6  | 9120  | ENSG00000108932 | validated |
| tarbase | hsa-miR-15b-5p  | PRKAR1A  | 5573  | ENSG00000108946 | validated |
| tarbase | hsa-miR-212-3p  | PRKAR1A  | 5573  | ENSG00000108946 | validated |
| tarbase | hsa-miR-301a-3p | FAM20A   | 54757 | ENSG00000108950 | validated |
| tarbase | hsa-miR-15b-5p  | YWHAE    | 7531  | ENSG00000108953 | validated |
| tarbase | hsa-miR-15b-5p  | MMD      | 23531 | ENSG00000108960 | validated |
| tarbase | hsa-miR-301a-3p | MMD      | 23531 | ENSG00000108960 | validated |
| tarbase | hsa-miR-21-5p   | MMD      | 23531 | ENSG00000108960 | validated |
| tarbase | hsa-miR-15b-5p  | WSB1     | 26118 | ENSG00000109046 | validated |

|         |                 |          |        |                 |           |
|---------|-----------------|----------|--------|-----------------|-----------|
| tarbase | hsa-miR-181a-5p | WSB1     | 26118  | ENSG00000109046 | validated |
| tarbase | hsa-miR-181a-5p | SLC9A3R1 | 9368   | ENSG00000109062 | validated |
| tarbase | hsa-miR-15b-5p  | TNFAIP1  | 7126   | ENSG00000109079 | validated |
| tarbase | hsa-miR-18a-5p  | TMEM97   | 27346  | ENSG00000109084 | validated |
| tarbase | hsa-miR-222-3p  | PMP22    | 5376   | ENSG00000109099 | validated |
| tarbase | hsa-miR-15b-5p  | PMP22    | 5376   | ENSG00000109099 | validated |
| tarbase | hsa-miR-212-3p  | FOXN1    | 8456   | ENSG00000109101 | validated |
| tarbase | hsa-miR-301a-3p | ALDOC    | 230    | ENSG00000109107 | validated |
| tarbase | hsa-miR-296-5p  | RAB34    | 83871  | ENSG00000109113 | validated |
| tarbase | hsa-miR-106b-5p | PHF12    | 57649  | ENSG00000109118 | validated |
| tarbase | hsa-miR-144-3p  | PHF12    | 57649  | ENSG00000109118 | validated |
| tarbase | hsa-miR-15b-5p  | PHF12    | 57649  | ENSG00000109118 | validated |
| tarbase | hsa-miR-18a-5p  | PHF12    | 57649  | ENSG00000109118 | validated |
| tarbase | hsa-miR-106b-5p | TMEM33   | 55161  | ENSG00000109133 | validated |
| tarbase | hsa-miR-326     | TMEM33   | 55161  | ENSG00000109133 | validated |
| tarbase | hsa-miR-181a-5p | TMEM33   | 55161  | ENSG00000109133 | validated |
| tarbase | hsa-miR-181a-5p | GABRA4   | 2557   | ENSG00000109158 | validated |
| tarbase | hsa-miR-181a-5p | SLAIN2   | 57606  | ENSG00000109171 | validated |
| tarbase | hsa-miR-181a-5p | OCIAD1   | 54940  | ENSG00000109180 | validated |
| tarbase | hsa-miR-15b-5p  | LAMTOR3  | 8649   | ENSG00000109270 | validated |
| tarbase | hsa-miR-301a-3p | NFKB1    | 4790   | ENSG00000109320 | validated |
| tarbase | hsa-miR-106b-5p | MANBA    | 4126   | ENSG00000109323 | validated |
| tarbase | hsa-miR-106b-5p | UBE2D3   | 7323   | ENSG00000109332 | validated |
| tarbase | hsa-miR-15b-5p  | UBE2D3   | 7323   | ENSG00000109332 | validated |
| tarbase | hsa-miR-181a-5p | UBE2D3   | 7323   | ENSG00000109332 | validated |
| tarbase | hsa-miR-18a-5p  | UBE2D3   | 7323   | ENSG00000109332 | validated |
| tarbase | hsa-miR-212-3p  | UBE2D3   | 7323   | ENSG00000109332 | validated |
| tarbase | hsa-miR-582-5p  | UBE2D3   | 7323   | ENSG00000109332 | validated |
| tarbase | hsa-miR-181a-5p | ELF2     | 1998   | ENSG00000109381 | validated |
| tarbase | hsa-miR-15b-5p  | TBC1D9   | 23158  | ENSG00000109436 | validated |
| tarbase | hsa-miR-18a-5p  | TBC1D9   | 23158  | ENSG00000109436 | validated |
| tarbase | hsa-miR-212-3p  | TBC1D9   | 23158  | ENSG00000109436 | validated |
| tarbase | hsa-miR-301a-3p | TBC1D9   | 23158  | ENSG00000109436 | validated |
| tarbase | hsa-miR-326     | TBC1D9   | 23158  | ENSG00000109436 | validated |
| tarbase | hsa-miR-181a-5p | TBC1D9   | 23158  | ENSG00000109436 | validated |
| tarbase | hsa-miR-222-3p  | ZNF330   | 27309  | ENSG00000109445 | validated |
| tarbase | hsa-miR-21-5p   | GAB1     | 2549   | ENSG00000109458 | validated |
| tarbase | hsa-miR-106b-5p | KLHL2    | 11275  | ENSG00000109466 | validated |
| tarbase | hsa-miR-15b-5p  | KLHL2    | 11275  | ENSG00000109466 | validated |
| tarbase | hsa-miR-181a-5p | KLHL2    | 11275  | ENSG00000109466 | validated |
| tarbase | hsa-miR-106b-5p | WFS1     | 7466   | ENSG00000109501 | validated |
| tarbase | hsa-miR-106b-5p | GRPEL1   | 80273  | ENSG00000109519 | validated |
| tarbase | hsa-miR-181a-5p | GRPEL1   | 80273  | ENSG00000109519 | validated |
| tarbase | hsa-miR-18a-5p  | GRPEL1   | 80273  | ENSG00000109519 | validated |
| tarbase | hsa-miR-21-5p   | GRPEL1   | 80273  | ENSG00000109519 | validated |
| tarbase | hsa-miR-15b-5p  | CLCN3    | 1182   | ENSG00000109572 | validated |
| tarbase | hsa-miR-222-3p  | CLCN3    | 1182   | ENSG00000109572 | validated |
| tarbase | hsa-miR-15b-5p  | GALNT7   | 51809  | ENSG00000109586 | validated |
| tarbase | hsa-miR-21-5p   | GALNT7   | 51809  | ENSG00000109586 | validated |
| tarbase | hsa-miR-106b-5p | GALNT7   | 51809  | ENSG00000109586 | validated |
| tarbase | hsa-miR-15b-5p  | DHX15    | 1665   | ENSG00000109606 | validated |
| tarbase | hsa-miR-181a-5p | DHX15    | 1665   | ENSG00000109606 | validated |
| tarbase | hsa-miR-192-5p  | DHX15    | 1665   | ENSG00000109606 | validated |
| tarbase | hsa-miR-192-5p  | TRIM2    | 23321  | ENSG00000109654 | validated |
| tarbase | hsa-miR-582-5p  | TRIM2    | 23321  | ENSG00000109654 | validated |
| tarbase | hsa-miR-15b-5p  | TRIM2    | 23321  | ENSG00000109654 | validated |
| tarbase | hsa-miR-15b-5p  | FBXW7    | 55294  | ENSG00000109670 | validated |
| tarbase | hsa-miR-505-3p  | FBXW7    | 55294  | ENSG00000109670 | validated |
| tarbase | hsa-miR-212-3p  | TBC1D19  | 55296  | ENSG00000109680 | validated |
| tarbase | hsa-miR-212-3p  | NSD2     | 7468   | ENSG00000109685 | validated |
| tarbase | hsa-miR-15b-5p  | SH3D19   | 152503 | ENSG00000109686 | validated |
| tarbase | hsa-miR-181a-5p | SH3D19   | 152503 | ENSG00000109686 | validated |
| tarbase | hsa-miR-582-5p  | STIM2    | 57620  | ENSG00000109689 | validated |
| tarbase | hsa-miR-21-5p   | MFS10    | 10227  | ENSG00000109736 | validated |
| tarbase | hsa-miR-212-3p  | GLRB     | 2743   | ENSG00000109738 | validated |
| tarbase | hsa-miR-301a-3p | RAPGEF2  | 9693   | ENSG00000109756 | validated |
| tarbase | hsa-miR-15b-5p  | RAPGEF2  | 9693   | ENSG00000109756 | validated |
| tarbase | hsa-miR-106b-5p | SNX25    | 83891  | ENSG00000109762 | validated |
| tarbase | hsa-miR-144-3p  | KLF3     | 51274  | ENSG00000109787 | validated |
| tarbase | hsa-miR-181a-5p | KLF3     | 51274  | ENSG00000109787 | validated |
| tarbase | hsa-miR-192-5p  | KLF3     | 51274  | ENSG00000109787 | validated |

|         |                 |           |       |                 |           |
|---------|-----------------|-----------|-------|-----------------|-----------|
| tarbase | hsa-miR-212-3p  | KLF3      | 51274 | ENSG00000109787 | validated |
| tarbase | hsa-miR-21-5p   | KLF3      | 51274 | ENSG00000109787 | validated |
| tarbase | hsa-miR-301a-3p | KLF3      | 51274 | ENSG00000109787 | validated |
| tarbase | hsa-miR-181a-5p | KLHL5     | 51088 | ENSG00000109790 | validated |
| tarbase | hsa-miR-106b-5p | KLHL5     | 51088 | ENSG00000109790 | validated |
| tarbase | hsa-miR-212-3p  | NCAPG     | 64151 | ENSG00000109805 | validated |
| tarbase | hsa-miR-106b-5p | UGDH      | 7358  | ENSG00000109814 | validated |
| tarbase | hsa-miR-301a-3p | UGDH      | 7358  | ENSG00000109814 | validated |
| tarbase | hsa-miR-181a-5p | CTSC      | 1075  | ENSG00000109861 | validated |
| tarbase | hsa-miR-21-5p   | CTSC      | 1075  | ENSG00000109861 | validated |
| tarbase | hsa-miR-21-5p   | ZPR1      | 8882  | ENSG00000109917 | validated |
| tarbase | hsa-miR-181a-5p | MTCH2     | 23788 | ENSG00000109919 | validated |
| tarbase | hsa-miR-15b-5p  | FNBP4     | 23360 | ENSG00000109920 | validated |
| tarbase | hsa-miR-15b-5p  | TECTA     | 7007  | ENSG00000109927 | validated |
| tarbase | hsa-miR-212-3p  | SC5D      | 6309  | ENSG00000109929 | validated |
| tarbase | hsa-miR-106b-5p | B3GAT1    | 27087 | ENSG00000109956 | validated |
| tarbase | hsa-miR-181a-5p | HSPA8     | 3312  | ENSG00000109971 | validated |
| tarbase | hsa-miR-18a-5p  | HSPA8     | 3312  | ENSG00000109971 | validated |
| tarbase | hsa-miR-21-5p   | HSPA8     | 3312  | ENSG00000109971 | validated |
| tarbase | hsa-miR-222-3p  | HSPA8     | 3312  | ENSG00000109971 | validated |
| tarbase | hsa-miR-106b-5p | LPXN      | 9404  | ENSG00000110031 | validated |
| tarbase | hsa-miR-582-3p  | DTX4      | 23220 | ENSG00000110042 | validated |
| tarbase | hsa-miR-21-5p   | EHD1      | 10938 | ENSG00000110047 | validated |
| tarbase | hsa-miR-301a-3p | DCPS      | 28960 | ENSG00000110063 | validated |
| tarbase | hsa-miR-21-5p   | KMT5B     | 51111 | ENSG00000110066 | validated |
| tarbase | hsa-miR-222-3p  | KMT5B     | 51111 | ENSG00000110066 | validated |
| tarbase | hsa-miR-212-3p  | KMT5B     | 51111 | ENSG00000110066 | validated |
| tarbase | hsa-miR-18a-5p  | PPP6R3    | 55291 | ENSG00000110075 | validated |
| tarbase | hsa-miR-15b-5p  | NRXN2     | 9379  | ENSG00000110076 | validated |
| tarbase | hsa-miR-15b-5p  | CPT1A     | 1374  | ENSG00000110090 | validated |
| tarbase | hsa-miR-181a-5p | CPT1A     | 1374  | ENSG00000110090 | validated |
| tarbase | hsa-miR-181a-5p | CCND1     | 595   | ENSG00000110092 | validated |
| tarbase | hsa-miR-21-5p   | CCND1     | 595   | ENSG00000110092 | validated |
| tarbase | hsa-miR-192-5p  | CCDC86    | 79080 | ENSG00000110104 | validated |
| tarbase | hsa-miR-106b-5p | PRPF19    | 27339 | ENSG00000110107 | validated |
| tarbase | hsa-miR-296-5p  | TMEM109   | 79073 | ENSG00000110108 | validated |
| tarbase | hsa-miR-106b-5p | TMEM109   | 79073 | ENSG00000110108 | validated |
| tarbase | hsa-miR-301a-3p | HPX       | 3263  | ENSG00000110169 | validated |
| tarbase | hsa-miR-106b-5p | TRIM3     | 10612 | ENSG00000110171 | validated |
| tarbase | hsa-miR-21-5p   | CHORDC1   | 26973 | ENSG00000110172 | validated |
| tarbase | hsa-miR-296-5p  | CHORDC1   | 26973 | ENSG00000110172 | validated |
| tarbase | hsa-miR-15b-5p  | CHORDC1   | 26973 | ENSG00000110172 | validated |
| tarbase | hsa-miR-212-3p  | CEP126    | 57562 | ENSG00000110318 | validated |
| tarbase | hsa-miR-144-3p  | EIF4G2    | 1982  | ENSG00000110321 | validated |
| tarbase | hsa-miR-15b-5p  | EIF4G2    | 1982  | ENSG00000110321 | validated |
| tarbase | hsa-miR-21-5p   | EIF4G2    | 1982  | ENSG00000110321 | validated |
| tarbase | hsa-miR-326     | EIF4G2    | 1982  | ENSG00000110321 | validated |
| tarbase | hsa-miR-505-3p  | EIF4G2    | 1982  | ENSG00000110321 | validated |
| tarbase | hsa-miR-326     | IL10RA    | 3587  | ENSG00000110324 | validated |
| tarbase | hsa-miR-18a-5p  | BIRC2     | 329   | ENSG00000110330 | validated |
| tarbase | hsa-miR-181a-5p | UBE4A     | 9354  | ENSG00000110344 | validated |
| tarbase | hsa-miR-222-3p  | UBE4A     | 9354  | ENSG00000110344 | validated |
| tarbase | hsa-miR-301a-3p | UBE4A     | 9354  | ENSG00000110344 | validated |
| tarbase | hsa-miR-106b-5p | DDX6      | 1656  | ENSG00000110367 | validated |
| tarbase | hsa-miR-15b-5p  | DDX6      | 1656  | ENSG00000110367 | validated |
| tarbase | hsa-miR-181a-5p | DDX6      | 1656  | ENSG00000110367 | validated |
| tarbase | hsa-miR-18a-5p  | DDX6      | 1656  | ENSG00000110367 | validated |
| tarbase | hsa-miR-212-3p  | DDX6      | 1656  | ENSG00000110367 | validated |
| tarbase | hsa-miR-15b-5p  | NECTIN1   | 5818  | ENSG00000110400 | validated |
| tarbase | hsa-miR-296-5p  | NECTIN1   | 5818  | ENSG00000110400 | validated |
| tarbase | hsa-miR-106b-5p | HIPK3     | 10114 | ENSG00000110422 | validated |
| tarbase | hsa-miR-144-3p  | HIPK3     | 10114 | ENSG00000110422 | validated |
| tarbase | hsa-miR-15b-5p  | HIPK3     | 10114 | ENSG00000110422 | validated |
| tarbase | hsa-miR-181a-5p | HIPK3     | 10114 | ENSG00000110422 | validated |
| tarbase | hsa-miR-192-5p  | HIPK3     | 10114 | ENSG00000110422 | validated |
| tarbase | hsa-miR-222-3p  | HIPK3     | 10114 | ENSG00000110422 | validated |
| tarbase | hsa-miR-301a-3p | HIPK3     | 10114 | ENSG00000110422 | validated |
| tarbase | hsa-miR-15b-5p  | KIAA1549L | 25758 | ENSG00000110427 | validated |
| tarbase | hsa-miR-106b-5p | FBXO3     | 26273 | ENSG00000110429 | validated |
| tarbase | hsa-miR-15b-5p  | FBXO3     | 26273 | ENSG00000110429 | validated |
| tarbase | hsa-miR-222-3p  | FBXO3     | 26273 | ENSG00000110429 | validated |

|         |                 |          |       |                 |           |
|---------|-----------------|----------|-------|-----------------|-----------|
| tarbase | hsa-miR-15b-5p  | PDHX     | 8050  | ENSG00000110435 | validated |
| tarbase | hsa-miR-582-5p  | PDHX     | 8050  | ENSG00000110435 | validated |
| tarbase | hsa-miR-181a-5p | SLC1A2   | 6506  | ENSG00000110436 | validated |
| tarbase | hsa-miR-212-3p  | SLC1A2   | 6506  | ENSG00000110436 | validated |
| tarbase | hsa-miR-296-5p  | MADD     | 8567  | ENSG00000110514 | validated |
| tarbase | hsa-miR-181a-5p | CARS1    | 833   | ENSG00000110619 | validated |
| tarbase | hsa-miR-106b-5p | CD81     | 975   | ENSG00000110651 | validated |
| tarbase | hsa-miR-15b-5p  | CD81     | 975   | ENSG00000110651 | validated |
| tarbase | hsa-miR-222-3p  | CD81     | 975   | ENSG00000110651 | validated |
| tarbase | hsa-miR-15b-5p  | C11orf58 | 10944 | ENSG00000110696 | validated |
| tarbase | hsa-miR-18a-5p  | C11orf58 | 10944 | ENSG00000110696 | validated |
| tarbase | hsa-miR-15b-5p  | AIP      | 9049  | ENSG00000110711 | validated |
| tarbase | hsa-miR-15b-5p  | NUP98    | 4928  | ENSG00000110713 | validated |
| tarbase | hsa-miR-296-5p  | NDUFS8   | 4728  | ENSG00000110717 | validated |
| tarbase | hsa-miR-15b-5p  | GTF2H1   | 2965  | ENSG00000110768 | validated |
| tarbase | hsa-miR-222-3p  | GTF2H1   | 2965  | ENSG00000110768 | validated |
| tarbase | hsa-miR-106b-5p | PRDM4    | 11108 | ENSG00000110851 | validated |
| tarbase | hsa-miR-212-3p  | CLEC2B   | 9976  | ENSG00000110852 | validated |
| tarbase | hsa-miR-15b-5p  | COQ5     | 84274 | ENSG00000110871 | validated |
| tarbase | hsa-miR-106b-5p | CORO1C   | 23603 | ENSG00000110880 | validated |
| tarbase | hsa-miR-212-3p  | CORO1C   | 23603 | ENSG00000110880 | validated |
| tarbase | hsa-miR-222-3p  | CORO1C   | 23603 | ENSG00000110880 | validated |
| tarbase | hsa-miR-181a-5p | CORO1C   | 23603 | ENSG00000110880 | validated |
| tarbase | hsa-miR-144-3p  | KCTD10   | 83892 | ENSG00000110906 | validated |
| tarbase | hsa-miR-15b-5p  | KCTD10   | 83892 | ENSG00000110906 | validated |
| tarbase | hsa-miR-21-5p   | KCTD10   | 83892 | ENSG00000110906 | validated |
| tarbase | hsa-miR-106b-5p | KCTD10   | 83892 | ENSG00000110906 | validated |
| tarbase | hsa-miR-15b-5p  | SLC11A2  | 4891  | ENSG00000110911 | validated |
| tarbase | hsa-miR-181a-5p | SLC11A2  | 4891  | ENSG00000110911 | validated |
| tarbase | hsa-miR-15b-5p  | MLEC     | 9761  | ENSG00000110917 | validated |
| tarbase | hsa-miR-181a-5p | MLEC     | 9761  | ENSG00000110917 | validated |
| tarbase | hsa-miR-212-3p  | MLEC     | 9761  | ENSG00000110917 | validated |
| tarbase | hsa-miR-222-3p  | MLEC     | 9761  | ENSG00000110917 | validated |
| tarbase | hsa-miR-582-3p  | MLEC     | 9761  | ENSG00000110917 | validated |
| tarbase | hsa-miR-106b-5p | MVK      | 4598  | ENSG00000110921 | validated |
| tarbase | hsa-miR-212-3p  | BIN2     | 51411 | ENSG00000110934 | validated |
| tarbase | hsa-miR-144-3p  | ATP5F1B  | 506   | ENSG00000110955 | validated |
| tarbase | hsa-miR-15b-5p  | ATP5F1B  | 506   | ENSG00000110955 | validated |
| tarbase | hsa-miR-181a-5p | ATP5F1B  | 506   | ENSG00000110955 | validated |
| tarbase | hsa-miR-301a-3p | ATP5F1B  | 506   | ENSG00000110955 | validated |
| tarbase | hsa-miR-301a-3p | PTGES3   | 10728 | ENSG00000110958 | validated |
| tarbase | hsa-miR-181a-5p | BCL7A    | 605   | ENSG00000110987 | validated |
| tarbase | hsa-miR-18a-5p  | BCL7A    | 605   | ENSG00000110987 | validated |
| tarbase | hsa-miR-212-3p  | BCL7A    | 605   | ENSG00000110987 | validated |
| tarbase | hsa-miR-212-3p  | CYP27B1  | 1594  | ENSG00000111012 | validated |
| tarbase | hsa-miR-15b-5p  | KRT18    | 3875  | ENSG00000111057 | validated |
| tarbase | hsa-miR-15b-5p  | TNS2     | 23371 | ENSG00000111077 | validated |
| tarbase | hsa-miR-582-3p  | PPM1H    | 57460 | ENSG00000111110 | validated |
| tarbase | hsa-miR-106b-5p | METAP2   | 10988 | ENSG00000111142 | validated |
| tarbase | hsa-miR-222-3p  | METAP2   | 10988 | ENSG00000111142 | validated |
| tarbase | hsa-miR-21-5p   | LTA4H    | 4048  | ENSG00000111144 | validated |
| tarbase | hsa-miR-15b-5p  | ELK3     | 2004  | ENSG00000111145 | validated |
| tarbase | hsa-miR-296-5p  | TRPV4    | 59341 | ENSG00000111199 | validated |
| tarbase | hsa-miR-212-3p  | TRPV4    | 59341 | ENSG00000111199 | validated |
| tarbase | hsa-miR-21-5p   | FOXM1    | 2305  | ENSG00000111206 | validated |
| tarbase | hsa-miR-296-5p  | FOXM1    | 2305  | ENSG00000111206 | validated |
| tarbase | hsa-miR-18a-5p  | VPS29    | 51699 | ENSG00000111237 | validated |
| tarbase | hsa-miR-181a-5p | SH2B3    | 10019 | ENSG00000111252 | validated |
| tarbase | hsa-miR-212-3p  | MANSC1   | 54682 | ENSG00000111261 | validated |
| tarbase | hsa-miR-212-3p  | DUSP16   | 80824 | ENSG00000111266 | validated |
| tarbase | hsa-miR-21-5p   | DUSP16   | 80824 | ENSG00000111266 | validated |
| tarbase | hsa-miR-106b-5p | CREBL2   | 1389  | ENSG00000111269 | validated |
| tarbase | hsa-miR-222-3p  | CREBL2   | 1389  | ENSG00000111269 | validated |
| tarbase | hsa-miR-15b-5p  | ALDH2    | 217   | ENSG00000111275 | validated |
| tarbase | hsa-miR-18a-5p  | CDKN1B   | 1027  | ENSG00000111276 | validated |
| tarbase | hsa-miR-582-5p  | CDKN1B   | 1027  | ENSG00000111276 | validated |
| tarbase | hsa-miR-212-3p  | CDKN1B   | 1027  | ENSG00000111276 | validated |
| tarbase | hsa-miR-181a-5p | NAA25    | 80018 | ENSG00000111300 | validated |
| tarbase | hsa-miR-21-5p   | NAA25    | 80018 | ENSG00000111300 | validated |
| tarbase | hsa-miR-301a-3p | NAA25    | 80018 | ENSG00000111300 | validated |
| tarbase | hsa-miR-106b-5p | CDK2AP1  | 8099  | ENSG00000111328 | validated |

|         |                 |           |       |                 |           |
|---------|-----------------|-----------|-------|-----------------|-----------|
| tarbase | hsa-miR-15b-5p  | CDK2AP1   | 8099  | ENSG00000111328 | validated |
| tarbase | hsa-miR-212-3p  | CDK2AP1   | 8099  | ENSG00000111328 | validated |
| tarbase | hsa-miR-301a-3p | OAS3      | 4940  | ENSG00000111331 | validated |
| tarbase | hsa-miR-106b-5p | OAS3      | 4940  | ENSG00000111331 | validated |
| tarbase | hsa-miR-212-3p  | OAS3      | 4940  | ENSG00000111331 | validated |
| tarbase | hsa-miR-106b-5p | OAS2      | 4939  | ENSG00000111335 | validated |
| tarbase | hsa-miR-212-3p  | OAS2      | 4939  | ENSG00000111335 | validated |
| tarbase | hsa-miR-15b-5p  | MGP       | 4256  | ENSG00000111341 | validated |
| tarbase | hsa-miR-21-5p   | ARHGDI3   | 397   | ENSG00000111348 | validated |
| tarbase | hsa-miR-505-3p  | GTF2H3    | 2967  | ENSG00000111358 | validated |
| tarbase | hsa-miR-505-3p  | DDX55     | 57696 | ENSG00000111364 | validated |
| tarbase | hsa-miR-106b-5p | SLC38A1   | 81539 | ENSG00000111371 | validated |
| tarbase | hsa-miR-15b-5p  | SLC38A1   | 81539 | ENSG00000111371 | validated |
| tarbase | hsa-miR-181a-5p | SLC38A1   | 81539 | ENSG00000111371 | validated |
| tarbase | hsa-miR-212-3p  | SLC38A1   | 81539 | ENSG00000111371 | validated |
| tarbase | hsa-miR-181a-5p | C12orf49  | 79794 | ENSG00000111412 | validated |
| tarbase | hsa-miR-582-3p  | C12orf49  | 79794 | ENSG00000111412 | validated |
| tarbase | hsa-miR-212-3p  | FZD10     | 11211 | ENSG00000111432 | validated |
| tarbase | hsa-miR-222-3p  | COPZ1     | 22818 | ENSG00000111481 | validated |
| tarbase | hsa-miR-582-3p  | COPZ1     | 22818 | ENSG00000111481 | validated |
| tarbase | hsa-miR-106b-5p | TBC1D30   | 23329 | ENSG00000111490 | validated |
| tarbase | hsa-miR-144-3p  | CAND1     | 55832 | ENSG00000111530 | validated |
| tarbase | hsa-miR-15b-5p  | CAND1     | 55832 | ENSG00000111530 | validated |
| tarbase | hsa-miR-181a-5p | CAND1     | 55832 | ENSG00000111530 | validated |
| tarbase | hsa-miR-21-5p   | CAND1     | 55832 | ENSG00000111530 | validated |
| tarbase | hsa-miR-222-3p  | CAND1     | 55832 | ENSG00000111530 | validated |
| tarbase | hsa-miR-301a-3p | CAND1     | 55832 | ENSG00000111530 | validated |
| tarbase | hsa-miR-192-5p  | RAB5B     | 5869  | ENSG00000111540 | validated |
| tarbase | hsa-miR-222-3p  | RAB5B     | 5869  | ENSG00000111540 | validated |
| tarbase | hsa-miR-326     | RAB5B     | 5869  | ENSG00000111540 | validated |
| tarbase | hsa-miR-181a-5p | RAB5B     | 5869  | ENSG00000111540 | validated |
| tarbase | hsa-miR-212-3p  | MDM1      | 56890 | ENSG00000111554 | validated |
| tarbase | hsa-miR-18a-5p  | NUP107    | 57122 | ENSG00000111581 | validated |
| tarbase | hsa-miR-326     | NUP107    | 57122 | ENSG00000111581 | validated |
| tarbase | hsa-miR-301a-3p | CNOT2     | 4848  | ENSG00000111596 | validated |
| tarbase | hsa-miR-144-3p  | CPSF6     | 11052 | ENSG00000111605 | validated |
| tarbase | hsa-miR-15b-5p  | CPSF6     | 11052 | ENSG00000111605 | validated |
| tarbase | hsa-miR-181a-5p | CPSF6     | 11052 | ENSG00000111605 | validated |
| tarbase | hsa-miR-212-3p  | CPSF6     | 11052 | ENSG00000111605 | validated |
| tarbase | hsa-miR-301a-3p | CPSF6     | 11052 | ENSG00000111605 | validated |
| tarbase | hsa-miR-106b-5p | MRPL51    | 51258 | ENSG00000111639 | validated |
| tarbase | hsa-miR-18a-5p  | GAPDH     | 2597  | ENSG00000111640 | validated |
| tarbase | hsa-miR-192-5p  | GAPDH     | 2597  | ENSG00000111640 | validated |
| tarbase | hsa-miR-21-5p   | GAPDH     | 2597  | ENSG00000111640 | validated |
| tarbase | hsa-miR-106b-5p | CHD4      | 1108  | ENSG00000111642 | validated |
| tarbase | hsa-miR-15b-5p  | CHD4      | 1108  | ENSG00000111642 | validated |
| tarbase | hsa-miR-301a-3p | CHD4      | 1108  | ENSG00000111642 | validated |
| tarbase | hsa-miR-21-5p   | UHRF1BP1L | 23074 | ENSG00000111647 | validated |
| tarbase | hsa-miR-15b-5p  | COPS7A    | 50813 | ENSG00000111652 | validated |
| tarbase | hsa-miR-106b-5p | CDCA3     | 83461 | ENSG00000111665 | validated |
| tarbase | hsa-miR-212-3p  | CDCA3     | 83461 | ENSG00000111665 | validated |
| tarbase | hsa-miR-15b-5p  | CHPT1     | 56994 | ENSG00000111666 | validated |
| tarbase | hsa-miR-296-5p  | ENO2      | 2026  | ENSG00000111674 | validated |
| tarbase | hsa-miR-106b-5p | ENO2      | 2026  | ENSG00000111674 | validated |
| tarbase | hsa-miR-192-5p  | ATN1      | 1822  | ENSG00000111676 | validated |
| tarbase | hsa-miR-296-5p  | ATN1      | 1822  | ENSG00000111676 | validated |
| tarbase | hsa-miR-326     | ATN1      | 1822  | ENSG00000111676 | validated |
| tarbase | hsa-miR-181a-5p | SUDS3     | 64426 | ENSG00000111707 | validated |
| tarbase | hsa-miR-301a-3p | SUDS3     | 64426 | ENSG00000111707 | validated |
| tarbase | hsa-miR-15b-5p  | GOLT1B    | 51026 | ENSG00000111711 | validated |
| tarbase | hsa-miR-301a-3p | GOLT1B    | 51026 | ENSG00000111711 | validated |
| tarbase | hsa-miR-181a-5p | GOLT1B    | 51026 | ENSG00000111711 | validated |
| tarbase | hsa-miR-106b-5p | HCFC2     | 29915 | ENSG00000111727 | validated |
| tarbase | hsa-miR-18a-5p  | HCFC2     | 29915 | ENSG00000111727 | validated |
| tarbase | hsa-miR-301a-3p | HCFC2     | 29915 | ENSG00000111727 | validated |
| tarbase | hsa-miR-212-3p  | HCFC2     | 29915 | ENSG00000111727 | validated |
| tarbase | hsa-miR-212-3p  | CLEC4A    | 50856 | ENSG00000111729 | validated |
| tarbase | hsa-miR-181a-5p | C2CD5     | 9847  | ENSG00000111731 | validated |
| tarbase | hsa-miR-18a-5p  | C2CD5     | 9847  | ENSG00000111731 | validated |
| tarbase | hsa-miR-301a-3p | C2CD5     | 9847  | ENSG00000111731 | validated |
| tarbase | hsa-miR-15b-5p  | RAB35     | 11021 | ENSG00000111737 | validated |

|         |                 |         |        |                 |           |
|---------|-----------------|---------|--------|-----------------|-----------|
| tarbase | hsa-miR-106b-5p | COL12A1 | 1303   | ENSG00000111799 | validated |
| tarbase | hsa-miR-15b-5p  | COL12A1 | 1303   | ENSG00000111799 | validated |
| tarbase | hsa-miR-181a-5p | COL12A1 | 1303   | ENSG00000111799 | validated |
| tarbase | hsa-miR-18a-5p  | COL12A1 | 1303   | ENSG00000111799 | validated |
| tarbase | hsa-miR-212-3p  | COL12A1 | 1303   | ENSG00000111799 | validated |
| tarbase | hsa-miR-21-5p   | COL12A1 | 1303   | ENSG00000111799 | validated |
| tarbase | hsa-miR-212-3p  | BTN3A3  | 10384  | ENSG00000111801 | validated |
| tarbase | hsa-miR-15b-5p  | TDP2    | 51567  | ENSG00000111802 | validated |
| tarbase | hsa-miR-106b-5p | FRK     | 2444   | ENSG00000111816 | validated |
| tarbase | hsa-miR-15b-5p  | FRK     | 2444   | ENSG00000111816 | validated |
| tarbase | hsa-miR-181a-5p | FRK     | 2444   | ENSG00000111816 | validated |
| tarbase | hsa-miR-192-5p  | FRK     | 2444   | ENSG00000111816 | validated |
| tarbase | hsa-miR-212-3p  | FRK     | 2444   | ENSG00000111816 | validated |
| tarbase | hsa-miR-222-3p  | FRK     | 2444   | ENSG00000111816 | validated |
| tarbase | hsa-miR-15b-5p  | DSE     | 29940  | ENSG00000111817 | validated |
| tarbase | hsa-miR-212-3p  | RSPH4A  | 345895 | ENSG00000111834 | validated |
| tarbase | hsa-miR-181a-5p | TMEM14C | 51522  | ENSG00000111843 | validated |
| tarbase | hsa-miR-106b-5p | PAK1IP1 | 55003  | ENSG00000111845 | validated |
| tarbase | hsa-miR-181a-5p | GCNT2   | 2651   | ENSG00000111846 | validated |
| tarbase | hsa-miR-21-5p   | GCNT2   | 2651   | ENSG00000111846 | validated |
| tarbase | hsa-miR-582-5p  | GCNT2   | 2651   | ENSG00000111846 | validated |
| tarbase | hsa-miR-106b-5p | ASF1A   | 25842  | ENSG00000111875 | validated |
| tarbase | hsa-miR-505-3p  | ASF1A   | 25842  | ENSG00000111875 | validated |
| tarbase | hsa-miR-18a-5p  | MCM9    | 254394 | ENSG00000111877 | validated |
| tarbase | hsa-miR-21-5p   | RNGTT   | 8732   | ENSG00000111880 | validated |
| tarbase | hsa-miR-15b-5p  | MAN1A1  | 4121   | ENSG00000111885 | validated |
| tarbase | hsa-miR-222-3p  | SERINC1 | 57515  | ENSG00000111897 | validated |
| tarbase | hsa-miR-301a-3p | HDCC2   | 51020  | ENSG00000111906 | validated |
| tarbase | hsa-miR-222-3p  | HINT3   | 135114 | ENSG00000111911 | validated |
| tarbase | hsa-miR-106b-5p | NCOA7   | 135112 | ENSG00000111912 | validated |
| tarbase | hsa-miR-106b-5p | SASH1   | 23328  | ENSG00000111961 | validated |
| tarbase | hsa-miR-18a-5p  | SASH1   | 23328  | ENSG00000111961 | validated |
| tarbase | hsa-miR-301a-3p | SASH1   | 23328  | ENSG00000111961 | validated |
| tarbase | hsa-miR-15b-5p  | UST     | 10090  | ENSG00000111962 | validated |
| tarbase | hsa-miR-106b-5p | PPARD   | 5467   | ENSG00000112033 | validated |
| tarbase | hsa-miR-18a-5p  | MAPK14  | 1432   | ENSG00000112062 | validated |
| tarbase | hsa-miR-505-3p  | MAPK14  | 1432   | ENSG00000112062 | validated |
| tarbase | hsa-miR-15b-5p  | KCTD20  | 222658 | ENSG00000112078 | validated |
| tarbase | hsa-miR-181a-5p | KCTD20  | 222658 | ENSG00000112078 | validated |
| tarbase | hsa-miR-301a-3p | KCTD20  | 222658 | ENSG00000112078 | validated |
| tarbase | hsa-miR-18a-5p  | KCTD20  | 222658 | ENSG00000112078 | validated |
| tarbase | hsa-miR-106b-5p | STK38   | 11329  | ENSG00000112079 | validated |
| tarbase | hsa-miR-301a-3p | STK38   | 11329  | ENSG00000112079 | validated |
| tarbase | hsa-miR-21-5p   | SOD2    | 6648   | ENSG00000112096 | validated |
| tarbase | hsa-miR-301a-3p | SOD2    | 6648   | ENSG00000112096 | validated |
| tarbase | hsa-miR-181a-5p | SOD2    | 6648   | ENSG00000112096 | validated |
| tarbase | hsa-miR-106b-5p | MCM3    | 4172   | ENSG00000112118 | validated |
| tarbase | hsa-miR-21-5p   | MCM3    | 4172   | ENSG00000112118 | validated |
| tarbase | hsa-miR-301a-3p | PHACTR1 | 221692 | ENSG00000112137 | validated |
| tarbase | hsa-miR-222-3p  | ICK     | 22858  | ENSG00000112144 | validated |
| tarbase | hsa-miR-21-5p   | CD83    | 9308   | ENSG00000112149 | validated |
| tarbase | hsa-miR-15b-5p  | MDN1    | 23195  | ENSG00000112159 | validated |
| tarbase | hsa-miR-21-5p   | MDN1    | 23195  | ENSG00000112159 | validated |
| tarbase | hsa-miR-296-5p  | MDN1    | 23195  | ENSG00000112159 | validated |
| tarbase | hsa-miR-181a-5p | BACH2   | 60468  | ENSG00000112182 | validated |
| tarbase | hsa-miR-18a-5p  | BACH2   | 60468  | ENSG00000112182 | validated |
| tarbase | hsa-miR-181a-5p | ZNF451  | 26036  | ENSG00000112200 | validated |
| tarbase | hsa-miR-18a-5p  | ZNF451  | 26036  | ENSG00000112200 | validated |
| tarbase | hsa-miR-192-5p  | ZNF451  | 26036  | ENSG00000112200 | validated |
| tarbase | hsa-miR-222-3p  | ZNF451  | 26036  | ENSG00000112200 | validated |
| tarbase | hsa-miR-301a-3p | ZNF451  | 26036  | ENSG00000112200 | validated |
| tarbase | hsa-miR-212-3p  | ZNF451  | 26036  | ENSG00000112200 | validated |
| tarbase | hsa-miR-106b-5p | BAG2    | 9532   | ENSG00000112208 | validated |
| tarbase | hsa-miR-181a-5p | RAB23   | 51715  | ENSG00000112210 | validated |
| tarbase | hsa-miR-106b-5p | GPR63   | 81491  | ENSG00000112218 | validated |
| tarbase | hsa-miR-15b-5p  | GPR63   | 81491  | ENSG00000112218 | validated |
| tarbase | hsa-miR-301a-3p | GPR63   | 81491  | ENSG00000112218 | validated |
| tarbase | hsa-miR-192-5p  | GPR63   | 81491  | ENSG00000112218 | validated |
| tarbase | hsa-miR-144-3p  | CCNC    | 892    | ENSG00000112237 | validated |
| tarbase | hsa-miR-15b-5p  | CCNC    | 892    | ENSG00000112237 | validated |
| tarbase | hsa-miR-181a-5p | CCNC    | 892    | ENSG00000112237 | validated |

|         |                 |          |        |                 |           |
|---------|-----------------|----------|--------|-----------------|-----------|
| tarbase | hsa-miR-212-3p  | CCNC     | 892    | ENSG00000112237 | validated |
| tarbase | hsa-miR-222-3p  | E2F3     | 1871   | ENSG00000112242 | validated |
| tarbase | hsa-miR-296-5p  | E2F3     | 1871   | ENSG00000112242 | validated |
| tarbase | hsa-miR-582-3p  | E2F3     | 1871   | ENSG00000112242 | validated |
| tarbase | hsa-miR-181a-5p | PTP4A1   | 7803   | ENSG00000112245 | validated |
| tarbase | hsa-miR-18a-5p  | PTP4A1   | 7803   | ENSG00000112245 | validated |
| tarbase | hsa-miR-192-5p  | PTP4A1   | 7803   | ENSG00000112245 | validated |
| tarbase | hsa-miR-301a-3p | PTP4A1   | 7803   | ENSG00000112245 | validated |
| tarbase | hsa-miR-212-3p  | SIM1     | 6492   | ENSG00000112246 | validated |
| tarbase | hsa-miR-106b-5p | ASCC3    | 10973  | ENSG00000112249 | validated |
| tarbase | hsa-miR-15b-5p  | ASCC3    | 10973  | ENSG00000112249 | validated |
| tarbase | hsa-miR-18a-5p  | ASCC3    | 10973  | ENSG00000112249 | validated |
| tarbase | hsa-miR-106b-5p | BVES     | 11149  | ENSG00000112276 | validated |
| tarbase | hsa-miR-15b-5p  | BVES     | 11149  | ENSG00000112276 | validated |
| tarbase | hsa-miR-181a-5p | BVES     | 11149  | ENSG00000112276 | validated |
| tarbase | hsa-miR-212-3p  | BVES     | 11149  | ENSG00000112276 | validated |
| tarbase | hsa-miR-18a-5p  | MED23    | 9439   | ENSG00000112282 | validated |
| tarbase | hsa-miR-301a-3p | MED23    | 9439   | ENSG00000112282 | validated |
| tarbase | hsa-miR-181a-5p | WASF1    | 8936   | ENSG00000112290 | validated |
| tarbase | hsa-miR-582-5p  | ALDH5A1  | 7915   | ENSG00000112294 | validated |
| tarbase | hsa-miR-15b-5p  | CRYBG1   | 202    | ENSG00000112297 | validated |
| tarbase | hsa-miR-106b-5p | CRYBG1   | 202    | ENSG00000112297 | validated |
| tarbase | hsa-miR-181a-5p | SMAP1    | 60682  | ENSG00000112305 | validated |
| tarbase | hsa-miR-106b-5p | C6orf62  | 81688  | ENSG00000112308 | validated |
| tarbase | hsa-miR-181a-5p | C6orf62  | 81688  | ENSG00000112308 | validated |
| tarbase | hsa-miR-301a-3p | C6orf62  | 81688  | ENSG00000112308 | validated |
| tarbase | hsa-miR-582-5p  | C6orf62  | 81688  | ENSG00000112308 | validated |
| tarbase | hsa-miR-222-3p  | GMNN     | 51053  | ENSG00000112312 | validated |
| tarbase | hsa-miR-106b-5p | SOBP     | 55084  | ENSG00000112320 | validated |
| tarbase | hsa-miR-15b-5p  | SOBP     | 55084  | ENSG00000112320 | validated |
| tarbase | hsa-miR-181a-5p | SOBP     | 55084  | ENSG00000112320 | validated |
| tarbase | hsa-miR-18a-5p  | SOBP     | 55084  | ENSG00000112320 | validated |
| tarbase | hsa-miR-301a-3p | SOBP     | 55084  | ENSG00000112320 | validated |
| tarbase | hsa-miR-212-3p  | SLC17A2  | 10246  | ENSG00000112337 | validated |
| tarbase | hsa-miR-301a-3p | TRIM38   | 10475  | ENSG00000112343 | validated |
| tarbase | hsa-miR-181a-5p | PERP     | 64065  | ENSG00000112378 | validated |
| tarbase | hsa-miR-505-3p  | PERP     | 64065  | ENSG00000112378 | validated |
| tarbase | hsa-miR-582-5p  | PERP     | 64065  | ENSG00000112378 | validated |
| tarbase | hsa-miR-181a-5p | ARFGEF3  | 57221  | ENSG00000112379 | validated |
| tarbase | hsa-miR-106b-5p | SLC16A10 | 117247 | ENSG00000112394 | validated |
| tarbase | hsa-miR-181a-5p | HECA     | 51696  | ENSG00000112406 | validated |
| tarbase | hsa-miR-301a-3p | HECA     | 51696  | ENSG00000112406 | validated |
| tarbase | hsa-miR-106b-5p | PHACTR2  | 9749   | ENSG00000112419 | validated |
| tarbase | hsa-miR-144-3p  | PHACTR2  | 9749   | ENSG00000112419 | validated |
| tarbase | hsa-miR-15b-5p  | PHACTR2  | 9749   | ENSG00000112419 | validated |
| tarbase | hsa-miR-18a-5p  | EPM2A    | 7957   | ENSG00000112425 | validated |
| tarbase | hsa-miR-222-3p  | EPM2A    | 7957   | ENSG00000112425 | validated |
| tarbase | hsa-miR-212-3p  | EPM2A    | 7957   | ENSG00000112425 | validated |
| tarbase | hsa-miR-181a-5p | CCR6     | 1235   | ENSG00000112486 | validated |
| tarbase | hsa-miR-21-5p   | CCR6     | 1235   | ENSG00000112486 | validated |
| tarbase | hsa-miR-106b-5p | PHF1     | 5252   | ENSG00000112511 | validated |
| tarbase | hsa-miR-222-3p  | PHF1     | 5252   | ENSG00000112511 | validated |
| tarbase | hsa-miR-15b-5p  | QKI      | 9444   | ENSG00000112531 | validated |
| tarbase | hsa-miR-181a-5p | QKI      | 9444   | ENSG00000112531 | validated |
| tarbase | hsa-miR-505-3p  | QKI      | 9444   | ENSG00000112531 | validated |
| tarbase | hsa-miR-582-5p  | CCND3    | 896    | ENSG00000112576 | validated |
| tarbase | hsa-miR-106b-5p | BYSL     | 705    | ENSG00000112578 | validated |
| tarbase | hsa-miR-15b-5p  | BYSL     | 705    | ENSG00000112578 | validated |
| tarbase | hsa-miR-15b-5p  | TBP      | 6908   | ENSG00000112592 | validated |
| tarbase | hsa-miR-301a-3p | TBP      | 6908   | ENSG00000112592 | validated |
| tarbase | hsa-miR-181a-5p | BICRAL   | 23506  | ENSG00000112624 | validated |
| tarbase | hsa-miR-212-3p  | BICRAL   | 23506  | ENSG00000112624 | validated |
| tarbase | hsa-miR-296-5p  | SRF      | 6722   | ENSG00000112658 | validated |
| tarbase | hsa-miR-106b-5p | DNPH1    | 10591  | ENSG00000112667 | validated |
| tarbase | hsa-miR-106b-5p | EXOC2    | 55770  | ENSG00000112685 | validated |
| tarbase | hsa-miR-301a-3p | COX7A2   | 1347   | ENSG00000112695 | validated |
| tarbase | hsa-miR-106b-5p | TMEM30A  | 55754  | ENSG00000112697 | validated |
| tarbase | hsa-miR-144-3p  | TMEM30A  | 55754  | ENSG00000112697 | validated |
| tarbase | hsa-miR-15b-5p  | TMEM30A  | 55754  | ENSG00000112697 | validated |
| tarbase | hsa-miR-21-5p   | TMEM30A  | 55754  | ENSG00000112697 | validated |
| tarbase | hsa-miR-326     | VEGFA    | 7422   | ENSG00000112715 | validated |



|         |                 |         |       |                 |           |
|---------|-----------------|---------|-------|-----------------|-----------|
| tarbase | hsa-miR-106b-5p | PRPF4B  | 8899  | ENSG00000112739 | validated |
| tarbase | hsa-miR-15b-5p  | TTK     | 7272  | ENSG00000112742 | validated |
| tarbase | hsa-miR-582-5p  | TTK     | 7272  | ENSG00000112742 | validated |
| tarbase | hsa-miR-212-3p  | TTK     | 7272  | ENSG00000112742 | validated |
| tarbase | hsa-miR-296-5p  | SLC29A1 | 2030  | ENSG00000112759 | validated |
| tarbase | hsa-miR-301a-3p | BTN2A1  | 11120 | ENSG00000112763 | validated |
| tarbase | hsa-miR-106b-5p | TENT5A  | 55603 | ENSG00000112773 | validated |
| tarbase | hsa-miR-15b-5p  | TENT5A  | 55603 | ENSG00000112773 | validated |
| tarbase | hsa-miR-222-3p  | TENT5A  | 55603 | ENSG00000112773 | validated |
| tarbase | hsa-miR-301a-3p | TENT5A  | 55603 | ENSG00000112773 | validated |
| tarbase | hsa-miR-296-5p  | FBRSL1  | 57666 | ENSG00000112787 | validated |
| tarbase | hsa-miR-212-3p  | TBX18   | 9096  | ENSG00000112837 | validated |
| tarbase | hsa-miR-212-3p  | NUDT12  | 83594 | ENSG00000112874 | validated |
| tarbase | hsa-miR-106b-5p | MAN2A1  | 4124  | ENSG00000112893 | validated |
| tarbase | hsa-miR-21-5p   | TENT4A  | 11044 | ENSG00000112941 | validated |
| tarbase | hsa-miR-212-3p  | GHR     | 2690  | ENSG00000112964 | validated |
| tarbase | hsa-miR-106b-5p | HMGCS1  | 3157  | ENSG00000112972 | validated |
| tarbase | hsa-miR-15b-5p  | HMGCS1  | 3157  | ENSG00000112972 | validated |
| tarbase | hsa-miR-181a-5p | HMGCS1  | 3157  | ENSG00000112972 | validated |
| tarbase | hsa-miR-222-3p  | HMGCS1  | 3157  | ENSG00000112972 | validated |
| tarbase | hsa-miR-326     | HMGCS1  | 3157  | ENSG00000112972 | validated |
| tarbase | hsa-miR-21-5p   | BRD8    | 10902 | ENSG00000112983 | validated |
| tarbase | hsa-miR-18a-5p  | KIF20A  | 10112 | ENSG00000112984 | validated |
| tarbase | hsa-miR-212-3p  | KIF20A  | 10112 | ENSG00000112984 | validated |
| tarbase | hsa-miR-15b-5p  | HSPA9   | 3313  | ENSG00000113013 | validated |
| tarbase | hsa-miR-18a-5p  | HSPA9   | 3313  | ENSG00000113013 | validated |
| tarbase | hsa-miR-582-5p  | HBEGF   | 1839  | ENSG00000113070 | validated |
| tarbase | hsa-miR-15b-5p  | SPARC   | 6678  | ENSG00000113140 | validated |
| tarbase | hsa-miR-222-3p  | SPARC   | 6678  | ENSG00000113140 | validated |
| tarbase | hsa-miR-212-3p  | SPARC   | 6678  | ENSG00000113140 | validated |
| tarbase | hsa-miR-15b-5p  | HMGCR   | 3156  | ENSG00000113161 | validated |
| tarbase | hsa-miR-181a-5p | HMGCR   | 3156  | ENSG00000113161 | validated |
| tarbase | hsa-miR-212-3p  | HMGCR   | 3156  | ENSG00000113161 | validated |
| tarbase | hsa-miR-582-5p  | HMGCR   | 3156  | ENSG00000113161 | validated |
| tarbase | hsa-miR-582-5p  | CERT1   | 10087 | ENSG00000113163 | validated |
| tarbase | hsa-miR-222-3p  | FAF2    | 23197 | ENSG00000113194 | validated |
| tarbase | hsa-miR-301a-3p | HAND1   | 9421  | ENSG00000113196 | validated |
| tarbase | hsa-miR-181a-5p | PDE8B   | 8622  | ENSG00000113231 | validated |
| tarbase | hsa-miR-582-5p  | PDE8B   | 8622  | ENSG00000113231 | validated |
| tarbase | hsa-miR-181a-5p | CLINT1  | 9685  | ENSG00000113282 | validated |
| tarbase | hsa-miR-582-3p  | CLINT1  | 9685  | ENSG00000113282 | validated |
| tarbase | hsa-miR-15b-5p  | CNOT6   | 57472 | ENSG00000113300 | validated |
| tarbase | hsa-miR-18a-5p  | CNOT6   | 57472 | ENSG00000113300 | validated |
| tarbase | hsa-miR-21-5p   | CNOT6   | 57472 | ENSG00000113300 | validated |
| tarbase | hsa-miR-301a-3p | CNOT6   | 57472 | ENSG00000113300 | validated |
| tarbase | hsa-miR-21-5p   | TTC1    | 7265  | ENSG00000113312 | validated |
| tarbase | hsa-miR-18a-5p  | CCNG1   | 900   | ENSG00000113328 | validated |
| tarbase | hsa-miR-582-5p  | CCNG1   | 900   | ENSG00000113328 | validated |
| tarbase | hsa-miR-18a-5p  | POLR3G  | 10622 | ENSG00000113356 | validated |
| tarbase | hsa-miR-181a-5p | DROSHA  | 29102 | ENSG00000113360 | validated |
| tarbase | hsa-miR-15b-5p  | LMNB1   | 4001  | ENSG00000113368 | validated |
| tarbase | hsa-miR-18a-5p  | LMNB1   | 4001  | ENSG00000113368 | validated |
| tarbase | hsa-miR-212-3p  | LMNB1   | 4001  | ENSG00000113368 | validated |
| tarbase | hsa-miR-21-5p   | LMNB1   | 4001  | ENSG00000113368 | validated |
| tarbase | hsa-miR-181a-5p | LMNB1   | 4001  | ENSG00000113368 | validated |
| tarbase | hsa-miR-106b-5p | ARRDC3  | 57561 | ENSG00000113369 | validated |
| tarbase | hsa-miR-21-5p   | ARRDC3  | 57561 | ENSG00000113369 | validated |
| tarbase | hsa-miR-301a-3p | ARRDC3  | 57561 | ENSG00000113369 | validated |
| tarbase | hsa-miR-106b-5p | GOLPH3  | 64083 | ENSG00000113384 | validated |
| tarbase | hsa-miR-181a-5p | GOLPH3  | 64083 | ENSG00000113384 | validated |
| tarbase | hsa-miR-582-3p  | GOLPH3  | 64083 | ENSG00000113384 | validated |
| tarbase | hsa-miR-21-5p   | SUB1    | 10923 | ENSG00000113387 | validated |
| tarbase | hsa-miR-181a-5p | SUB1    | 10923 | ENSG00000113387 | validated |
| tarbase | hsa-miR-106b-5p | LNPEP   | 4012  | ENSG00000113441 | validated |
| tarbase | hsa-miR-181a-5p | LNPEP   | 4012  | ENSG00000113441 | validated |
| tarbase | hsa-miR-222-3p  | LNPEP   | 4012  | ENSG00000113441 | validated |
| tarbase | hsa-miR-181a-5p | RAD1    | 5810  | ENSG00000113456 | validated |
| tarbase | hsa-miR-106b-5p | BRIX1   | 55299 | ENSG00000113460 | validated |
| tarbase | hsa-miR-181a-5p | BRIX1   | 55299 | ENSG00000113460 | validated |
| tarbase | hsa-miR-222-3p  | BRIX1   | 55299 | ENSG00000113460 | validated |
| tarbase | hsa-miR-192-5p  | PRLR    | 5618  | ENSG00000113494 | validated |

|         |                 |           |       |                 |           |
|---------|-----------------|-----------|-------|-----------------|-----------|
| tarbase | hsa-miR-21-5p   | PRLR      | 5618  | ENSG00000113494 | validated |
| tarbase | hsa-miR-212-3p  | RAD50     | 10111 | ENSG00000113522 | validated |
| tarbase | hsa-miR-212-3p  | IL5       | 3567  | ENSG00000113525 | validated |
| tarbase | hsa-miR-181a-5p | ST8SIA4   | 7903  | ENSG00000113532 | validated |
| tarbase | hsa-miR-192-5p  | GNPDA1    | 10007 | ENSG00000113552 | validated |
| tarbase | hsa-miR-181a-5p | SKP1      | 6500  | ENSG00000113558 | validated |
| tarbase | hsa-miR-582-5p  | NUP155    | 9631  | ENSG00000113569 | validated |
| tarbase | hsa-miR-181a-5p | NUP155    | 9631  | ENSG00000113569 | validated |
| tarbase | hsa-miR-106b-5p | PPP2CA    | 5515  | ENSG00000113575 | validated |
| tarbase | hsa-miR-15b-5p  | PPP2CA    | 5515  | ENSG00000113575 | validated |
| tarbase | hsa-miR-181a-5p | PPP2CA    | 5515  | ENSG00000113575 | validated |
| tarbase | hsa-miR-301a-3p | PPP2CA    | 5515  | ENSG00000113575 | validated |
| tarbase | hsa-miR-144-3p  | FGF1      | 2246  | ENSG00000113578 | validated |
| tarbase | hsa-miR-181a-5p | NR3C1     | 2908  | ENSG00000113580 | validated |
| tarbase | hsa-miR-301a-3p | NR3C1     | 2908  | ENSG00000113580 | validated |
| tarbase | hsa-miR-21-5p   | NR3C1     | 2908  | ENSG00000113580 | validated |
| tarbase | hsa-miR-181a-5p | LIFR      | 3977  | ENSG00000113594 | validated |
| tarbase | hsa-miR-222-3p  | LIFR      | 3977  | ENSG00000113594 | validated |
| tarbase | hsa-miR-181a-5p | TRIM23    | 373   | ENSG00000113595 | validated |
| tarbase | hsa-miR-181a-5p | SEC24A    | 10802 | ENSG00000113615 | validated |
| tarbase | hsa-miR-212-3p  | SEC24A    | 10802 | ENSG00000113615 | validated |
| tarbase | hsa-miR-106b-5p | SEC24A    | 10802 | ENSG00000113615 | validated |
| tarbase | hsa-miR-181a-5p | TXNDC15   | 79770 | ENSG00000113621 | validated |
| tarbase | hsa-miR-15b-5p  | RARS1     | 5917  | ENSG00000113643 | validated |
| tarbase | hsa-miR-181a-5p | WWC1      | 23286 | ENSG00000113645 | validated |
| tarbase | hsa-miR-192-5p  | MACROH2A1 | 9555  | ENSG00000113648 | validated |
| tarbase | hsa-miR-21-5p   | MACROH2A1 | 9555  | ENSG00000113648 | validated |
| tarbase | hsa-miR-106b-5p | TCERG1    | 10915 | ENSG00000113649 | validated |
| tarbase | hsa-miR-181a-5p | TCERG1    | 10915 | ENSG00000113649 | validated |
| tarbase | hsa-miR-192-5p  | TCERG1    | 10915 | ENSG00000113649 | validated |
| tarbase | hsa-miR-181a-5p | SMAD5     | 4090  | ENSG00000113658 | validated |
| tarbase | hsa-miR-212-3p  | SMAD5     | 4090  | ENSG00000113658 | validated |
| tarbase | hsa-miR-301a-3p | SMAD5     | 4090  | ENSG00000113658 | validated |
| tarbase | hsa-miR-15b-5p  | CSNK1A1   | 1452  | ENSG00000113712 | validated |
| tarbase | hsa-miR-18a-5p  | CSNK1A1   | 1452  | ENSG00000113712 | validated |
| tarbase | hsa-miR-301a-3p | CSNK1A1   | 1452  | ENSG00000113712 | validated |
| tarbase | hsa-miR-18a-5p  | ERGIC1    | 57222 | ENSG00000113719 | validated |
| tarbase | hsa-miR-326     | ERGIC1    | 57222 | ENSG00000113719 | validated |
| tarbase | hsa-miR-18a-5p  | ATP6V0E1  | 8992  | ENSG00000113732 | validated |
| tarbase | hsa-miR-192-5p  | ATP6V0E1  | 8992  | ENSG00000113732 | validated |
| tarbase | hsa-miR-181a-5p | STC2      | 8614  | ENSG00000113739 | validated |
| tarbase | hsa-miR-301a-3p | STC2      | 8614  | ENSG00000113739 | validated |
| tarbase | hsa-miR-106b-5p | STC2      | 8614  | ENSG00000113739 | validated |
| tarbase | hsa-miR-15b-5p  | CPEB4     | 80315 | ENSG00000113742 | validated |
| tarbase | hsa-miR-301a-3p | CPEB4     | 80315 | ENSG00000113742 | validated |
| tarbase | hsa-miR-212-3p  | DBN1      | 1627  | ENSG00000113758 | validated |
| tarbase | hsa-miR-15b-5p  | ZNF346    | 23567 | ENSG00000113761 | validated |
| tarbase | hsa-miR-106b-5p | SMC4      | 10051 | ENSG00000113810 | validated |
| tarbase | hsa-miR-181a-5p | SMC4      | 10051 | ENSG00000113810 | validated |
| tarbase | hsa-miR-21-5p   | SMC4      | 10051 | ENSG00000113810 | validated |
| tarbase | hsa-miR-301a-3p | SMC4      | 10051 | ENSG00000113810 | validated |
| tarbase | hsa-miR-18a-5p  | SMC4      | 10051 | ENSG00000113810 | validated |
| tarbase | hsa-miR-181a-5p | SELENOK   | 58515 | ENSG00000113811 | validated |
| tarbase | hsa-miR-301a-3p | SELENOK   | 58515 | ENSG00000113811 | validated |
| tarbase | hsa-miR-106b-5p | TIMMDC1   | 51300 | ENSG00000113845 | validated |
| tarbase | hsa-miR-582-5p  | CRBN      | 51185 | ENSG00000113851 | validated |
| tarbase | hsa-miR-106b-5p | CRBN      | 51185 | ENSG00000113851 | validated |
| tarbase | hsa-miR-181a-5p | AMOTL2    | 51421 | ENSG00000114019 | validated |
| tarbase | hsa-miR-301a-3p | AMOTL2    | 51421 | ENSG00000114019 | validated |
| tarbase | hsa-miR-106b-5p | KPNA1     | 3836  | ENSG00000114030 | validated |
| tarbase | hsa-miR-18a-5p  | KPNA1     | 3836  | ENSG00000114030 | validated |
| tarbase | hsa-miR-301a-3p | KPNA1     | 3836  | ENSG00000114030 | validated |
| tarbase | hsa-miR-106b-5p | PCCB      | 5096  | ENSG00000114054 | validated |
| tarbase | hsa-miR-15b-5p  | UBE3A     | 7337  | ENSG00000114062 | validated |
| tarbase | hsa-miR-181a-5p | UBE3A     | 7337  | ENSG00000114062 | validated |
| tarbase | hsa-miR-106b-5p | ARMC8     | 25852 | ENSG00000114098 | validated |
| tarbase | hsa-miR-18a-5p  | ARMC8     | 25852 | ENSG00000114098 | validated |
| tarbase | hsa-miR-21-5p   | ARMC8     | 25852 | ENSG00000114098 | validated |
| tarbase | hsa-miR-582-5p  | ARMC8     | 25852 | ENSG00000114098 | validated |
| tarbase | hsa-miR-106b-5p | RBP1      | 5947  | ENSG00000114115 | validated |
| tarbase | hsa-miR-106b-5p | SLC25A36  | 55186 | ENSG00000114120 | validated |

|         |                 |          |       |                 |           |
|---------|-----------------|----------|-------|-----------------|-----------|
| tarbase | hsa-miR-181a-5p | SLC25A36 | 55186 | ENSG00000114120 | validated |
| tarbase | hsa-miR-212-3p  | SLC25A36 | 55186 | ENSG00000114120 | validated |
| tarbase | hsa-miR-582-5p  | SLC25A36 | 55186 | ENSG00000114120 | validated |
| tarbase | hsa-miR-181a-5p | RNF7     | 9616  | ENSG00000114125 | validated |
| tarbase | hsa-miR-15b-5p  | XRN1     | 54464 | ENSG00000114127 | validated |
| tarbase | hsa-miR-181a-5p | XRN1     | 54464 | ENSG00000114127 | validated |
| tarbase | hsa-miR-212-3p  | XRN1     | 54464 | ENSG00000114127 | validated |
| tarbase | hsa-miR-222-3p  | XRN1     | 54464 | ENSG00000114127 | validated |
| tarbase | hsa-miR-212-3p  | KAT2B    | 8850  | ENSG00000114166 | validated |
| tarbase | hsa-miR-212-3p  | WNT5A    | 7474  | ENSG00000114251 | validated |
| tarbase | hsa-miR-301a-3p | WNT5A    | 7474  | ENSG00000114251 | validated |
| tarbase | hsa-miR-181a-5p | FGF12    | 2257  | ENSG00000114279 | validated |
| tarbase | hsa-miR-181a-5p | ACAP2    | 23527 | ENSG00000114331 | validated |
| tarbase | hsa-miR-106b-5p | ECT2     | 1894  | ENSG00000114346 | validated |
| tarbase | hsa-miR-21-5p   | ECT2     | 1894  | ENSG00000114346 | validated |
| tarbase | hsa-miR-326     | ECT2     | 1894  | ENSG00000114346 | validated |
| tarbase | hsa-miR-181a-5p | GNAI2    | 2771  | ENSG00000114353 | validated |
| tarbase | hsa-miR-301a-3p | GNAI2    | 2771  | ENSG00000114353 | validated |
| tarbase | hsa-miR-15b-5p  | TFG      | 10342 | ENSG00000114354 | validated |
| tarbase | hsa-miR-222-3p  | TFG      | 10342 | ENSG00000114354 | validated |
| tarbase | hsa-miR-181a-5p | USP9Y    | 8287  | ENSG00000114374 | validated |
| tarbase | hsa-miR-106b-5p | TUSC2    | 11334 | ENSG00000114383 | validated |
| tarbase | hsa-miR-15b-5p  | TUSC2    | 11334 | ENSG00000114383 | validated |
| tarbase | hsa-miR-212-3p  | TUSC2    | 11334 | ENSG00000114383 | validated |
| tarbase | hsa-miR-326     | CYB561D2 | 11068 | ENSG00000114395 | validated |
| tarbase | hsa-miR-181a-5p | C3orf14  | 57415 | ENSG00000114405 | validated |
| tarbase | hsa-miR-106b-5p | FXR1     | 8087  | ENSG00000114416 | validated |
| tarbase | hsa-miR-21-5p   | FXR1     | 8087  | ENSG00000114416 | validated |
| tarbase | hsa-miR-212-3p  | CBLB     | 868   | ENSG00000114423 | validated |
| tarbase | hsa-miR-18a-5p  | BBX      | 56987 | ENSG00000114439 | validated |
| tarbase | hsa-miR-181a-5p | GNB4     | 59345 | ENSG00000114450 | validated |
| tarbase | hsa-miR-222-3p  | GNB4     | 59345 | ENSG00000114450 | validated |
| tarbase | hsa-miR-181a-5p | SNX4     | 8723  | ENSG00000114520 | validated |
| tarbase | hsa-miR-15b-5p  | FRMD4B   | 23150 | ENSG00000114541 | validated |
| tarbase | hsa-miR-301a-3p | SLC41A3  | 54946 | ENSG00000114544 | validated |
| tarbase | hsa-miR-15b-5p  | PLXNA1   | 5361  | ENSG00000114554 | validated |
| tarbase | hsa-miR-18a-5p  | PLXNA1   | 5361  | ENSG00000114554 | validated |
| tarbase | hsa-miR-144-3p  | ATP6V1A  | 523   | ENSG00000114573 | validated |
| tarbase | hsa-miR-21-5p   | ATP6V1A  | 523   | ENSG00000114573 | validated |
| tarbase | hsa-miR-582-3p  | ATP6V1A  | 523   | ENSG00000114573 | validated |
| tarbase | hsa-miR-582-5p  | ATP6V1A  | 523   | ENSG00000114573 | validated |
| tarbase | hsa-miR-15b-5p  | ATP6V1A  | 523   | ENSG00000114573 | validated |
| tarbase | hsa-miR-181a-5p | ATP6V1A  | 523   | ENSG00000114573 | validated |
| tarbase | hsa-miR-106b-5p | MRPL3    | 11222 | ENSG00000114686 | validated |
| tarbase | hsa-miR-192-5p  | MRPL3    | 11222 | ENSG00000114686 | validated |
| tarbase | hsa-miR-106b-5p | PLSCR4   | 57088 | ENSG00000114698 | validated |
| tarbase | hsa-miR-181a-5p | CISH     | 1154  | ENSG00000114737 | validated |
| tarbase | hsa-miR-181a-5p | ACVR2B   | 93    | ENSG00000114739 | validated |
| tarbase | hsa-miR-18a-5p  | ACVR2B   | 93    | ENSG00000114739 | validated |
| tarbase | hsa-miR-212-3p  | ACVR2B   | 93    | ENSG00000114739 | validated |
| tarbase | hsa-miR-222-3p  | ACVR2B   | 93    | ENSG00000114739 | validated |
| tarbase | hsa-miR-301a-3p | ACVR2B   | 93    | ENSG00000114739 | validated |
| tarbase | hsa-miR-326     | ACVR2B   | 93    | ENSG00000114739 | validated |
| tarbase | hsa-miR-582-5p  | ACVR2B   | 93    | ENSG00000114739 | validated |
| tarbase | hsa-miR-106b-5p | WDR48    | 57599 | ENSG00000114742 | validated |
| tarbase | hsa-miR-181a-5p | WDR48    | 57599 | ENSG00000114742 | validated |
| tarbase | hsa-miR-106b-5p | PEX5L    | 51555 | ENSG00000114757 | validated |
| tarbase | hsa-miR-21-5p   | PEX5L    | 51555 | ENSG00000114757 | validated |
| tarbase | hsa-miR-15b-5p  | RRP9     | 9136  | ENSG00000114767 | validated |
| tarbase | hsa-miR-15b-5p  | ABCC5    | 10057 | ENSG00000114770 | validated |
| tarbase | hsa-miR-21-5p   | ABCC5    | 10057 | ENSG00000114770 | validated |
| tarbase | hsa-miR-326     | ABCC5    | 10057 | ENSG00000114770 | validated |
| tarbase | hsa-miR-18a-5p  | ARHGEF26 | 26084 | ENSG00000114790 | validated |
| tarbase | hsa-miR-106b-5p | SSR3     | 6747  | ENSG00000114850 | validated |
| tarbase | hsa-miR-181a-5p | SSR3     | 6747  | ENSG00000114850 | validated |
| tarbase | hsa-miR-222-3p  | SSR3     | 6747  | ENSG00000114850 | validated |
| tarbase | hsa-miR-15b-5p  | ZBTB47   | 92999 | ENSG00000114853 | validated |
| tarbase | hsa-miR-301a-3p | ZBTB47   | 92999 | ENSG00000114853 | validated |
| tarbase | hsa-miR-212-3p  | TNNC1    | 7134  | ENSG00000114854 | validated |
| tarbase | hsa-miR-18a-5p  | NKTR     | 4820  | ENSG00000114857 | validated |
| tarbase | hsa-miR-222-3p  | NKTR     | 4820  | ENSG00000114857 | validated |

|         |                 |         |        |                 |           |
|---------|-----------------|---------|--------|-----------------|-----------|
| tarbase | hsa-miR-181a-5p | FOXP1   | 27086  | ENSG00000114861 | validated |
| tarbase | hsa-miR-15b-5p  | FOXP1   | 27086  | ENSG00000114861 | validated |
| tarbase | hsa-miR-15b-5p  | EIF4G1  | 1981   | ENSG00000114867 | validated |
| tarbase | hsa-miR-21-5p   | EIF4G1  | 1981   | ENSG00000114867 | validated |
| tarbase | hsa-miR-296-5p  | EIF4G1  | 1981   | ENSG00000114867 | validated |
| tarbase | hsa-miR-326     | EIF4G1  | 1981   | ENSG00000114867 | validated |
| tarbase | hsa-miR-582-3p  | EIF4G1  | 1981   | ENSG00000114867 | validated |
| tarbase | hsa-miR-18a-5p  | INO80D  | 54891  | ENSG00000114933 | validated |
| tarbase | hsa-miR-301a-3p | INO80D  | 54891  | ENSG00000114933 | validated |
| tarbase | hsa-miR-15b-5p  | ADAM23  | 8745   | ENSG00000114948 | validated |
| tarbase | hsa-miR-181a-5p | DGUOK   | 1716   | ENSG00000114956 | validated |
| tarbase | hsa-miR-106b-5p | MOB1A   | 55233  | ENSG00000114978 | validated |
| tarbase | hsa-miR-18a-5p  | MOB1A   | 55233  | ENSG00000114978 | validated |
| tarbase | hsa-miR-222-3p  | MOB1A   | 55233  | ENSG00000114978 | validated |
| tarbase | hsa-miR-296-5p  | MOB1A   | 55233  | ENSG00000114978 | validated |
| tarbase | hsa-miR-15b-5p  | LMAN2L  | 81562  | ENSG00000114988 | validated |
| tarbase | hsa-miR-301a-3p | RTKN    | 6242   | ENSG00000114993 | validated |
| tarbase | hsa-miR-18a-5p  | TTL     | 150465 | ENSG00000114999 | validated |
| tarbase | hsa-miR-21-5p   | TTL     | 150465 | ENSG00000114999 | validated |
| tarbase | hsa-miR-301a-3p | TTL     | 150465 | ENSG00000114999 | validated |
| tarbase | hsa-miR-301a-3p | PIKFYVE | 200576 | ENSG00000115020 | validated |
| tarbase | hsa-miR-106b-5p | NCL     | 4691   | ENSG00000115053 | validated |
| tarbase | hsa-miR-144-3p  | NCL     | 4691   | ENSG00000115053 | validated |
| tarbase | hsa-miR-21-5p   | NCL     | 4691   | ENSG00000115053 | validated |
| tarbase | hsa-miR-326     | NCL     | 4691   | ENSG00000115053 | validated |
| tarbase | hsa-miR-212-3p  | ACTR1B  | 10120  | ENSG00000115073 | validated |
| tarbase | hsa-miR-296-5p  | ACTR1B  | 10120  | ENSG00000115073 | validated |
| tarbase | hsa-miR-326     | ACTR1B  | 10120  | ENSG00000115073 | validated |
| tarbase | hsa-miR-15b-5p  | SLC35F5 | 80255  | ENSG00000115084 | validated |
| tarbase | hsa-miR-18a-5p  | SLC35F5 | 80255  | ENSG00000115084 | validated |
| tarbase | hsa-miR-212-3p  | SLC35F5 | 80255  | ENSG00000115084 | validated |
| tarbase | hsa-miR-181a-5p | SLC35F5 | 80255  | ENSG00000115084 | validated |
| tarbase | hsa-miR-15b-5p  | ACTR3   | 10096  | ENSG00000115091 | validated |
| tarbase | hsa-miR-181a-5p | ACTR3   | 10096  | ENSG00000115091 | validated |
| tarbase | hsa-miR-18a-5p  | STEAP3  | 55240  | ENSG00000115107 | validated |
| tarbase | hsa-miR-222-3p  | SF3B6   | 51639  | ENSG00000115128 | validated |
| tarbase | hsa-miR-18a-5p  | DNAJC27 | 51277  | ENSG00000115137 | validated |
| tarbase | hsa-miR-296-5p  | DNAJC27 | 51277  | ENSG00000115137 | validated |
| tarbase | hsa-miR-18a-5p  | STAM2   | 10254  | ENSG00000115145 | validated |
| tarbase | hsa-miR-106b-5p | GPD2    | 2820   | ENSG00000115159 | validated |
| tarbase | hsa-miR-212-3p  | CENPA   | 1058   | ENSG00000115163 | validated |
| tarbase | hsa-miR-18a-5p  | TANC1   | 85461  | ENSG00000115183 | validated |
| tarbase | hsa-miR-21-5p   | TANC1   | 85461  | ENSG00000115183 | validated |
| tarbase | hsa-miR-301a-3p | TANC1   | 85461  | ENSG00000115183 | validated |
| tarbase | hsa-miR-326     | TANC1   | 85461  | ENSG00000115183 | validated |
| tarbase | hsa-miR-15b-5p  | GTF3C2  | 2976   | ENSG00000115207 | validated |
| tarbase | hsa-miR-301a-3p | GTF3C2  | 2976   | ENSG00000115207 | validated |
| tarbase | hsa-miR-15b-5p  | NRBP1   | 29959  | ENSG00000115216 | validated |
| tarbase | hsa-miR-301a-3p | NRBP1   | 29959  | ENSG00000115216 | validated |
| tarbase | hsa-miR-326     | SNX17   | 9784   | ENSG00000115234 | validated |
| tarbase | hsa-miR-15b-5p  |         |        | ENSG00000115239 | validated |
| tarbase | hsa-miR-106b-5p | PPM1G   | 5496   | ENSG00000115241 | validated |
| tarbase | hsa-miR-212-3p  | PPM1G   | 5496   | ENSG00000115241 | validated |
| tarbase | hsa-miR-326     | PPM1G   | 5496   | ENSG00000115241 | validated |
| tarbase | hsa-miR-212-3p  | IFIH1   | 64135  | ENSG00000115267 | validated |
| tarbase | hsa-miR-18a-5p  | RPS15   | 6209   | ENSG00000115268 | validated |
| tarbase | hsa-miR-18a-5p  | CLIP4   | 79745  | ENSG00000115295 | validated |
| tarbase | hsa-miR-181a-5p | SPTBN1  | 6711   | ENSG00000115306 | validated |
| tarbase | hsa-miR-21-5p   | SPTBN1  | 6711   | ENSG00000115306 | validated |
| tarbase | hsa-miR-301a-3p | SPTBN1  | 6711   | ENSG00000115306 | validated |
| tarbase | hsa-miR-326     | SPTBN1  | 6711   | ENSG00000115306 | validated |
| tarbase | hsa-miR-582-5p  | SPTBN1  | 6711   | ENSG00000115306 | validated |
| tarbase | hsa-miR-15b-5p  | AUP1    | 550    | ENSG00000115307 | validated |
| tarbase | hsa-miR-18a-5p  | AUP1    | 550    | ENSG00000115307 | validated |
| tarbase | hsa-miR-192-5p  | AUP1    | 550    | ENSG00000115307 | validated |
| tarbase | hsa-miR-106b-5p | RTN4    | 57142  | ENSG00000115310 | validated |
| tarbase | hsa-miR-181a-5p | RTN4    | 57142  | ENSG00000115310 | validated |
| tarbase | hsa-miR-212-3p  | RTN4    | 57142  | ENSG00000115310 | validated |
| tarbase | hsa-miR-301a-3p | RTN4    | 57142  | ENSG00000115310 | validated |
| tarbase | hsa-miR-582-5p  | RTN4    | 57142  | ENSG00000115310 | validated |
| tarbase | hsa-miR-222-3p  | HTRA2   | 27429  | ENSG00000115317 | validated |

|         |                 |         |       |                 |           |
|---------|-----------------|---------|-------|-----------------|-----------|
| tarbase | hsa-miR-296-5p  | HTRA2   | 27429 | ENSG00000115317 | validated |
| tarbase | hsa-miR-15b-5p  | GALNT3  | 2591  | ENSG00000115339 | validated |
| tarbase | hsa-miR-301a-3p | POLE4   | 56655 | ENSG00000115350 | validated |
| tarbase | hsa-miR-21-5p   | CCDC88A | 55704 | ENSG00000115355 | validated |
| tarbase | hsa-miR-15b-5p  | CCDC88A | 55704 | ENSG00000115355 | validated |
| tarbase | hsa-miR-222-3p  | MRPL19  | 9801  | ENSG00000115364 | validated |
| tarbase | hsa-miR-212-3p  | WDR75   | 84128 | ENSG00000115368 | validated |
| tarbase | hsa-miR-222-3p  | WDR75   | 84128 | ENSG00000115368 | validated |
| tarbase | hsa-miR-15b-5p  | EFEMP1  | 2202  | ENSG00000115380 | validated |
| tarbase | hsa-miR-301a-3p | FN1     | 2335  | ENSG00000115414 | validated |
| tarbase | hsa-miR-181a-5p | STAT1   | 6772  | ENSG00000115415 | validated |
| tarbase | hsa-miR-212-3p  | STAT1   | 6772  | ENSG00000115415 | validated |
| tarbase | hsa-miR-181a-5p | GLS     | 2744  | ENSG00000115419 | validated |
| tarbase | hsa-miR-21-5p   | GLS     | 2744  | ENSG00000115419 | validated |
| tarbase | hsa-miR-505-3p  | GLS     | 2744  | ENSG00000115419 | validated |
| tarbase | hsa-miR-15b-5p  | GLS     | 2744  | ENSG00000115419 | validated |
| tarbase | hsa-miR-106b-5p | IGFBP5  | 3488  | ENSG00000115461 | validated |
| tarbase | hsa-miR-15b-5p  | IGFBP5  | 3488  | ENSG00000115461 | validated |
| tarbase | hsa-miR-212-3p  | IGFBP5  | 3488  | ENSG00000115461 | validated |
| tarbase | hsa-miR-21-5p   | IGFBP5  | 3488  | ENSG00000115461 | validated |
| tarbase | hsa-miR-181a-5p | USP34   | 9736  | ENSG00000115464 | validated |
| tarbase | hsa-miR-15b-5p  | CCT4    | 10575 | ENSG00000115484 | validated |
| tarbase | hsa-miR-192-5p  | CCT4    | 10575 | ENSG00000115484 | validated |
| tarbase | hsa-miR-106b-5p | CCT4    | 10575 | ENSG00000115484 | validated |
| tarbase | hsa-miR-106b-5p | EHBP1   | 23301 | ENSG00000115504 | validated |
| tarbase | hsa-miR-192-5p  | EHBP1   | 23301 | ENSG00000115504 | validated |
| tarbase | hsa-miR-106b-5p | COQ10B  | 80219 | ENSG00000115520 | validated |
| tarbase | hsa-miR-18a-5p  | COQ10B  | 80219 | ENSG00000115520 | validated |
| tarbase | hsa-miR-106b-5p | SF3B1   | 23451 | ENSG00000115524 | validated |
| tarbase | hsa-miR-15b-5p  | SF3B1   | 23451 | ENSG00000115524 | validated |
| tarbase | hsa-miR-18a-5p  | SF3B1   | 23451 | ENSG00000115524 | validated |
| tarbase | hsa-miR-15b-5p  | ST3GAL5 | 8869  | ENSG00000115525 | validated |
| tarbase | hsa-miR-181a-5p | ST3GAL5 | 8869  | ENSG00000115525 | validated |
| tarbase | hsa-miR-301a-3p | ST3GAL5 | 8869  | ENSG00000115525 | validated |
| tarbase | hsa-miR-301a-3p | HSPE1   | 3336  | ENSG00000115541 | validated |
| tarbase | hsa-miR-582-5p  | HSPE1   | 3336  | ENSG00000115541 | validated |
| tarbase | hsa-miR-15b-5p  | HSPE1   | 3336  | ENSG00000115541 | validated |
| tarbase | hsa-miR-18a-5p  | KDM3A   | 55818 | ENSG00000115548 | validated |
| tarbase | hsa-miR-106b-5p | CHMP3   | 51652 | ENSG00000115561 | validated |
| tarbase | hsa-miR-212-3p  | IL1R1   | 3554  | ENSG00000115594 | validated |
| tarbase | hsa-miR-15b-5p  | SLC9A2  | 6549  | ENSG00000115616 | validated |
| tarbase | hsa-miR-301a-3p | SLC9A2  | 6549  | ENSG00000115616 | validated |
| tarbase | hsa-miR-181a-5p | FHL2    | 2274  | ENSG00000115641 | validated |
| tarbase | hsa-miR-181a-5p | CNPPD1  | 27013 | ENSG00000115649 | validated |
| tarbase | hsa-miR-192-5p  | HDLBP   | 3069  | ENSG00000115677 | validated |
| tarbase | hsa-miR-21-5p   | HDLBP   | 3069  | ENSG00000115677 | validated |
| tarbase | hsa-miR-296-5p  | HDLBP   | 3069  | ENSG00000115677 | validated |
| tarbase | hsa-miR-582-3p  | HDLBP   | 3069  | ENSG00000115677 | validated |
| tarbase | hsa-miR-212-3p  | STK25   | 10494 | ENSG00000115694 | validated |
| tarbase | hsa-miR-15b-5p  | ID2     | 3398  | ENSG00000115738 | validated |
| tarbase | hsa-miR-212-3p  | ID2     | 3398  | ENSG00000115738 | validated |
| tarbase | hsa-miR-15b-5p  | ODC1    | 4953  | ENSG00000115758 | validated |
| tarbase | hsa-miR-106b-5p | BIRC6   | 57448 | ENSG00000115760 | validated |
| tarbase | hsa-miR-181a-5p | BIRC6   | 57448 | ENSG00000115760 | validated |
| tarbase | hsa-miR-222-3p  | BIRC6   | 57448 | ENSG00000115760 | validated |
| tarbase | hsa-miR-301a-3p | BIRC6   | 57448 | ENSG00000115760 | validated |
| tarbase | hsa-miR-505-3p  | BIRC6   | 57448 | ENSG00000115760 | validated |
| tarbase | hsa-miR-18a-5p  | BIRC6   | 57448 | ENSG00000115760 | validated |
| tarbase | hsa-miR-106b-5p | PLEKHB2 | 55041 | ENSG00000115762 | validated |
| tarbase | hsa-miR-181a-5p | PLEKHB2 | 55041 | ENSG00000115762 | validated |
| tarbase | hsa-miR-301a-3p | PLEKHB2 | 55041 | ENSG00000115762 | validated |
| tarbase | hsa-miR-18a-5p  | GORASP2 | 26003 | ENSG00000115806 | validated |
| tarbase | hsa-miR-301a-3p | GORASP2 | 26003 | ENSG00000115806 | validated |
| tarbase | hsa-miR-582-5p  | GORASP2 | 26003 | ENSG00000115806 | validated |
| tarbase | hsa-miR-106b-5p | STRN    | 6801  | ENSG00000115808 | validated |
| tarbase | hsa-miR-181a-5p | STRN    | 6801  | ENSG00000115808 | validated |
| tarbase | hsa-miR-21-5p   | STRN    | 6801  | ENSG00000115808 | validated |
| tarbase | hsa-miR-222-3p  | STRN    | 6801  | ENSG00000115808 | validated |
| tarbase | hsa-miR-21-5p   | CEBPZ   | 10153 | ENSG00000115816 | validated |
| tarbase | hsa-miR-301a-3p | PRKD3   | 23683 | ENSG00000115825 | validated |
| tarbase | hsa-miR-181a-5p | DCAF17  | 80067 | ENSG00000115827 | validated |

|         |                 |          |       |                 |           |
|---------|-----------------|----------|-------|-----------------|-----------|
| tarbase | hsa-miR-18a-5p  | DCAF17   | 80067 | ENSG00000115827 | validated |
| tarbase | hsa-miR-15b-5p  | QPCT     | 25797 | ENSG00000115828 | validated |
| tarbase | hsa-miR-181a-5p | RAB3GAP1 | 22930 | ENSG00000115839 | validated |
| tarbase | hsa-miR-296-5p  | SLC25A12 | 8604  | ENSG00000115840 | validated |
| tarbase | hsa-miR-301a-3p | SLC25A12 | 8604  | ENSG00000115840 | validated |
| tarbase | hsa-miR-21-5p   | DLX2     | 1746  | ENSG00000115844 | validated |
| tarbase | hsa-miR-15b-5p  | DARS1    | 1615  | ENSG00000115866 | validated |
| tarbase | hsa-miR-181a-5p | DARS1    | 1615  | ENSG00000115866 | validated |
| tarbase | hsa-miR-301a-3p | SRSF7    | 6432  | ENSG00000115875 | validated |
| tarbase | hsa-miR-144-3p  | SDC1     | 6382  | ENSG00000115884 | validated |
| tarbase | hsa-miR-222-3p  | SDC1     | 6382  | ENSG00000115884 | validated |
| tarbase | hsa-miR-326     | SDC1     | 6382  | ENSG00000115884 | validated |
| tarbase | hsa-miR-181a-5p | PLCL1    | 5334  | ENSG00000115896 | validated |
| tarbase | hsa-miR-212-3p  | PLCL1    | 5334  | ENSG00000115896 | validated |
| tarbase | hsa-miR-15b-5p  | SLC1A4   | 6509  | ENSG00000115902 | validated |
| tarbase | hsa-miR-106b-5p | SOS1     | 6654  | ENSG00000115904 | validated |
| tarbase | hsa-miR-301a-3p | SOS1     | 6654  | ENSG00000115904 | validated |
| tarbase | hsa-miR-181a-5p | SOS1     | 6654  | ENSG00000115904 | validated |
| tarbase | hsa-miR-21-5p   | KYNU     | 8942  | ENSG00000115919 | validated |
| tarbase | hsa-miR-18a-5p  | ORC2     | 4999  | ENSG00000115942 | validated |
| tarbase | hsa-miR-15b-5p  | ORC2     | 4999  | ENSG00000115942 | validated |
| tarbase | hsa-miR-106b-5p | COX7A2L  | 9167  | ENSG00000115944 | validated |
| tarbase | hsa-miR-181a-5p | COX7A2L  | 9167  | ENSG00000115944 | validated |
| tarbase | hsa-miR-106b-5p | RND3     | 390   | ENSG00000115963 | validated |
| tarbase | hsa-miR-21-5p   | RND3     | 390   | ENSG00000115963 | validated |
| tarbase | hsa-miR-212-3p  | RND3     | 390   | ENSG00000115963 | validated |
| tarbase | hsa-miR-15b-5p  | ATF2     | 1386  | ENSG00000115966 | validated |
| tarbase | hsa-miR-222-3p  | ATF2     | 1386  | ENSG00000115966 | validated |
| tarbase | hsa-miR-582-5p  | ATF2     | 1386  | ENSG00000115966 | validated |
| tarbase | hsa-miR-181a-5p | ATF2     | 1386  | ENSG00000115966 | validated |
| tarbase | hsa-miR-18a-5p  | AAK1     | 22848 | ENSG00000115977 | validated |
| tarbase | hsa-miR-301a-3p | AAK1     | 22848 | ENSG00000115977 | validated |
| tarbase | hsa-miR-181a-5p | AAK1     | 22848 | ENSG00000115977 | validated |
| tarbase | hsa-miR-192-5p  | TRAK2    | 66008 | ENSG00000115993 | validated |
| tarbase | hsa-miR-181a-5p | TRAK2    | 66008 | ENSG00000115993 | validated |
| tarbase | hsa-miR-106b-5p | TIA1     | 7072  | ENSG00000116001 | validated |
| tarbase | hsa-miR-181a-5p | PCYOX1   | 51449 | ENSG00000116005 | validated |
| tarbase | hsa-miR-106b-5p | EPAS1    | 2034  | ENSG00000116016 | validated |
| tarbase | hsa-miR-326     | EPAS1    | 2034  | ENSG00000116016 | validated |
| tarbase | hsa-miR-106b-5p | ARID3A   | 1820  | ENSG00000116017 | validated |
| tarbase | hsa-miR-296-5p  | ARID3A   | 1820  | ENSG00000116017 | validated |
| tarbase | hsa-miR-582-5p  | ARID3A   | 1820  | ENSG00000116017 | validated |
| tarbase | hsa-miR-18a-5p  | SUMO1    | 7341  | ENSG00000116030 | validated |
| tarbase | hsa-miR-192-5p  | SUMO1    | 7341  | ENSG00000116030 | validated |
| tarbase | hsa-miR-296-5p  | SUMO1    | 7341  | ENSG00000116030 | validated |
| tarbase | hsa-miR-301a-3p | SUMO1    | 7341  | ENSG00000116030 | validated |
| tarbase | hsa-miR-106b-5p | NFE2L2   | 4780  | ENSG00000116044 | validated |
| tarbase | hsa-miR-18a-5p  | NFE2L2   | 4780  | ENSG00000116044 | validated |
| tarbase | hsa-miR-505-3p  | NFE2L2   | 4780  | ENSG00000116044 | validated |
| tarbase | hsa-miR-212-3p  | MSH6     | 2956  | ENSG00000116062 | validated |
| tarbase | hsa-miR-296-5p  | MSH6     | 2956  | ENSG00000116062 | validated |
| tarbase | hsa-miR-15b-5p  | PLEKHA3  | 65977 | ENSG00000116095 | validated |
| tarbase | hsa-miR-222-3p  | PLEKHA3  | 65977 | ENSG00000116095 | validated |
| tarbase | hsa-miR-18a-5p  | EPHA4    | 2043  | ENSG00000116106 | validated |
| tarbase | hsa-miR-301a-3p | EPHA4    | 2043  | ENSG00000116106 | validated |
| tarbase | hsa-miR-192-5p  | ALMS1    | 7840  | ENSG00000116127 | validated |
| tarbase | hsa-miR-15b-5p  | BCL9     | 607   | ENSG00000116128 | validated |
| tarbase | hsa-miR-18a-5p  | PRRX1    | 5396  | ENSG00000116132 | validated |
| tarbase | hsa-miR-21-5p   | PRRX1    | 5396  | ENSG00000116132 | validated |
| tarbase | hsa-miR-106b-5p | DHCR24   | 1718  | ENSG00000116133 | validated |
| tarbase | hsa-miR-18a-5p  | DHCR24   | 1718  | ENSG00000116133 | validated |
| tarbase | hsa-miR-15b-5p  | DNAJC16  | 23341 | ENSG00000116138 | validated |
| tarbase | hsa-miR-18a-5p  | DNAJC16  | 23341 | ENSG00000116138 | validated |
| tarbase | hsa-miR-106b-5p | MARK1    | 4139  | ENSG00000116141 | validated |
| tarbase | hsa-miR-15b-5p  | MARK1    | 4139  | ENSG00000116141 | validated |
| tarbase | hsa-miR-181a-5p | MARK1    | 4139  | ENSG00000116141 | validated |
| tarbase | hsa-miR-222-3p  | MARK1    | 4139  | ENSG00000116141 | validated |
| tarbase | hsa-miR-181a-5p | CACYBP   | 27101 | ENSG00000116161 | validated |
| tarbase | hsa-miR-192-5p  | RALGPS2  | 55103 | ENSG00000116191 | validated |
| tarbase | hsa-miR-21-5p   | CEP104   | 9731  | ENSG00000116198 | validated |
| tarbase | hsa-miR-15b-5p  | TMEM59   | 9528  | ENSG00000116209 | validated |

|         |                 |          |        |                 |           |
|---------|-----------------|----------|--------|-----------------|-----------|
| tarbase | hsa-miR-222-3p  | TMEM59   | 9528   | ENSG00000116209 | validated |
| tarbase | hsa-miR-296-5p  | LRRC42   | 115353 | ENSG00000116212 | validated |
| tarbase | hsa-miR-15b-5p  | ICMT     | 23463  | ENSG00000116237 | validated |
| tarbase | hsa-miR-181a-5p | ICMT     | 23463  | ENSG00000116237 | validated |
| tarbase | hsa-miR-18a-5p  | ICMT     | 23463  | ENSG00000116237 | validated |
| tarbase | hsa-miR-192-5p  | ICMT     | 23463  | ENSG00000116237 | validated |
| tarbase | hsa-miR-296-5p  | RPL22    | 6146   | ENSG00000116251 | validated |
| tarbase | hsa-miR-15b-5p  | QSOX1    | 5768   | ENSG00000116260 | validated |
| tarbase | hsa-miR-326     | QSOX1    | 5768   | ENSG00000116260 | validated |
| tarbase | hsa-miR-144-3p  | PHF13    | 148479 | ENSG00000116273 | validated |
| tarbase | hsa-miR-582-3p  | PHF13    | 148479 | ENSG00000116273 | validated |
| tarbase | hsa-miR-582-5p  | PHF13    | 148479 | ENSG00000116273 | validated |
| tarbase | hsa-miR-144-3p  | ERRFI1   | 54206  | ENSG00000116285 | validated |
| tarbase | hsa-miR-192-5p  | KCNC4    | 3749   | ENSG00000116396 | validated |
| tarbase | hsa-miR-296-5p  | KCNC4    | 3749   | ENSG00000116396 | validated |
| tarbase | hsa-miR-326     | KCNC4    | 3749   | ENSG00000116396 | validated |
| tarbase | hsa-miR-181a-5p | EDEM3    | 80267  | ENSG00000116406 | validated |
| tarbase | hsa-miR-212-3p  | EDEM3    | 80267  | ENSG00000116406 | validated |
| tarbase | hsa-miR-301a-3p | RAP1A    | 5906   | ENSG00000116473 | validated |
| tarbase | hsa-miR-21-5p   | HDAC1    | 3065   | ENSG00000116478 | validated |
| tarbase | hsa-miR-15b-5p  | CAPZA1   | 829    | ENSG00000116489 | validated |
| tarbase | hsa-miR-212-3p  | CAPZA1   | 829    | ENSG00000116489 | validated |
| tarbase | hsa-miR-21-5p   | CAPZA1   | 829    | ENSG00000116489 | validated |
| tarbase | hsa-miR-582-3p  | CAPZA1   | 829    | ENSG00000116489 | validated |
| tarbase | hsa-miR-296-5p  | S100PBP  | 64766  | ENSG00000116497 | validated |
| tarbase | hsa-miR-181a-5p | ASH1L    | 55870  | ENSG00000116539 | validated |
| tarbase | hsa-miR-18a-5p  | ASH1L    | 55870  | ENSG00000116539 | validated |
| tarbase | hsa-miR-192-5p  | ASH1L    | 55870  | ENSG00000116539 | validated |
| tarbase | hsa-miR-21-5p   | ASH1L    | 55870  | ENSG00000116539 | validated |
| tarbase | hsa-miR-301a-3p | ASH1L    | 55870  | ENSG00000116539 | validated |
| tarbase | hsa-miR-505-3p  | ASH1L    | 55870  | ENSG00000116539 | validated |
| tarbase | hsa-miR-582-3p  | ASH1L    | 55870  | ENSG00000116539 | validated |
| tarbase | hsa-miR-15b-5p  | SFPQ     | 6421   | ENSG00000116560 | validated |
| tarbase | hsa-miR-18a-5p  | SFPQ     | 6421   | ENSG00000116560 | validated |
| tarbase | hsa-miR-192-5p  | SFPQ     | 6421   | ENSG00000116560 | validated |
| tarbase | hsa-miR-212-3p  | SFPQ     | 6421   | ENSG00000116560 | validated |
| tarbase | hsa-miR-296-5p  | SFPQ     | 6421   | ENSG00000116560 | validated |
| tarbase | hsa-miR-505-3p  | MEF2D    | 4209   | ENSG00000116604 | validated |
| tarbase | hsa-miR-582-5p  | MEF2D    | 4209   | ENSG00000116604 | validated |
| tarbase | hsa-miR-106b-5p | DOCK7    | 85440  | ENSG00000116641 | validated |
| tarbase | hsa-miR-296-5p  | C1orf21  | 81563  | ENSG00000116667 | validated |
| tarbase | hsa-miR-106b-5p | C1orf21  | 81563  | ENSG00000116667 | validated |
| tarbase | hsa-miR-296-5p  | MAD2L2   | 10459  | ENSG00000116670 | validated |
| tarbase | hsa-miR-181a-5p | DNAJC6   | 9829   | ENSG00000116675 | validated |
| tarbase | hsa-miR-582-3p  | IVNS1ABP | 10625  | ENSG00000116679 | validated |
| tarbase | hsa-miR-582-5p  | IVNS1ABP | 10625  | ENSG00000116679 | validated |
| tarbase | hsa-miR-181a-5p | IVNS1ABP | 10625  | ENSG00000116679 | validated |
| tarbase | hsa-miR-181a-5p | SMG7     | 9887   | ENSG00000116698 | validated |
| tarbase | hsa-miR-301a-3p | SMG7     | 9887   | ENSG00000116698 | validated |
| tarbase | hsa-miR-326     | SMG7     | 9887   | ENSG00000116698 | validated |
| tarbase | hsa-miR-582-3p  | SMG7     | 9887   | ENSG00000116698 | validated |
| tarbase | hsa-miR-18a-5p  | SMG7     | 9887   | ENSG00000116698 | validated |
| tarbase | hsa-miR-181a-5p | NCF2     | 4688   | ENSG00000116701 | validated |
| tarbase | hsa-miR-222-3p  | SLC35D1  | 23169  | ENSG00000116704 | validated |
| tarbase | hsa-miR-301a-3p | SLC35D1  | 23169  | ENSG00000116704 | validated |
| tarbase | hsa-miR-582-3p  | GADD45A  | 1647   | ENSG00000116717 | validated |
| tarbase | hsa-miR-212-3p  | GADD45A  | 1647   | ENSG00000116717 | validated |
| tarbase | hsa-miR-326     | PRDM2    | 7799   | ENSG00000116731 | validated |
| tarbase | hsa-miR-582-5p  | PRDM2    | 7799   | ENSG00000116731 | validated |
| tarbase | hsa-miR-106b-5p | RO60     | 6738   | ENSG00000116747 | validated |
| tarbase | hsa-miR-181a-5p | RO60     | 6738   | ENSG00000116747 | validated |
| tarbase | hsa-miR-192-5p  | RO60     | 6738   | ENSG00000116747 | validated |
| tarbase | hsa-miR-222-3p  | RO60     | 6738   | ENSG00000116747 | validated |
| tarbase | hsa-miR-582-3p  | RO60     | 6738   | ENSG00000116747 | validated |
| tarbase | hsa-miR-18a-5p  | RO60     | 6738   | ENSG00000116747 | validated |
| tarbase | hsa-miR-106b-5p | UCHL5    | 51377  | ENSG00000116750 | validated |
| tarbase | hsa-miR-21-5p   | BCAS2    | 10286  | ENSG00000116752 | validated |
| tarbase | hsa-miR-106b-5p | CTH      | 1491   | ENSG00000116761 | validated |
| tarbase | hsa-miR-15b-5p  | PLEKHM2  | 23207  | ENSG00000116786 | validated |
| tarbase | hsa-miR-106b-5p | TTF2     | 8458   | ENSG00000116830 | validated |
| tarbase | hsa-miR-18a-5p  | TTF2     | 8458   | ENSG00000116830 | validated |

|         |                 |          |        |                 |           |
|---------|-----------------|----------|--------|-----------------|-----------|
| tarbase | hsa-miR-212-3p  | TTF2     | 8458   | ENSG00000116830 | validated |
| tarbase | hsa-miR-301a-3p | TMEM9    | 252839 | ENSG00000116857 | validated |
| tarbase | hsa-miR-582-5p  | MAP7D1   | 55700  | ENSG00000116871 | validated |
| tarbase | hsa-miR-212-3p  | OSCP1    | 127700 | ENSG00000116885 | validated |
| tarbase | hsa-miR-181a-5p | EXOC8    | 149371 | ENSG00000116903 | validated |
| tarbase | hsa-miR-106b-5p | TSNAX    | 7257   | ENSG00000116918 | validated |
| tarbase | hsa-miR-505-3p  | C1orf109 | 54955  | ENSG00000116922 | validated |
| tarbase | hsa-miR-212-3p  | RRAGC    | 64121  | ENSG00000116954 | validated |
| tarbase | hsa-miR-296-5p  | NID1     | 4811   | ENSG00000116962 | validated |
| tarbase | hsa-miR-582-5p  | NID1     | 4811   | ENSG00000116962 | validated |
| tarbase | hsa-miR-106b-5p | LGALS8   | 3964   | ENSG00000116977 | validated |
| tarbase | hsa-miR-301a-3p | LGALS8   | 3964   | ENSG00000116977 | validated |
| tarbase | hsa-miR-21-5p   | LGALS8   | 3964   | ENSG00000116977 | validated |
| tarbase | hsa-miR-181a-5p | MTR      | 4548   | ENSG00000116984 | validated |
| tarbase | hsa-miR-301a-3p | MTR      | 4548   | ENSG00000116984 | validated |
| tarbase | hsa-miR-582-3p  | MTR      | 4548   | ENSG00000116984 | validated |
| tarbase | hsa-miR-106b-5p | MYCL     | 4610   | ENSG00000116990 | validated |
| tarbase | hsa-miR-106b-5p | SIPA1L2  | 57568  | ENSG00000116991 | validated |
| tarbase | hsa-miR-15b-5p  | SIPA1L2  | 57568  | ENSG00000116991 | validated |
| tarbase | hsa-miR-181a-5p | AKT3     | 10000  | ENSG00000117020 | validated |
| tarbase | hsa-miR-326     | AKT3     | 10000  | ENSG00000117020 | validated |
| tarbase | hsa-miR-505-3p  | AKT3     | 10000  | ENSG00000117020 | validated |
| tarbase | hsa-miR-18a-5p  | ETV3     | 2117   | ENSG00000117036 | validated |
| tarbase | hsa-miR-222-3p  | ETV3     | 2117   | ENSG00000117036 | validated |
| tarbase | hsa-miR-326     | ADGRL2   | 23266  | ENSG00000117114 | validated |
| tarbase | hsa-miR-582-3p  | ADGRL2   | 23266  | ENSG00000117114 | validated |
| tarbase | hsa-miR-15b-5p  | MFAP2    | 4237   | ENSG00000117122 | validated |
| tarbase | hsa-miR-106b-5p | KDM5B    | 10765  | ENSG00000117139 | validated |
| tarbase | hsa-miR-18a-5p  | KDM5B    | 10765  | ENSG00000117139 | validated |
| tarbase | hsa-miR-212-3p  | KDM5B    | 10765  | ENSG00000117139 | validated |
| tarbase | hsa-miR-212-3p  | RGS4     | 5999   | ENSG00000117152 | validated |
| tarbase | hsa-miR-181a-5p | RGS4     | 5999   | ENSG00000117152 | validated |
| tarbase | hsa-miR-181a-5p | KLHL12   | 59349  | ENSG00000117153 | validated |
| tarbase | hsa-miR-18a-5p  | SSX2IP   | 117178 | ENSG00000117155 | validated |
| tarbase | hsa-miR-582-5p  | SSX2IP   | 117178 | ENSG00000117155 | validated |
| tarbase | hsa-miR-181a-5p | GBP3     | 2635   | ENSG00000117226 | validated |
| tarbase | hsa-miR-212-3p  | GBP1     | 2633   | ENSG00000117228 | validated |
| tarbase | hsa-miR-15b-5p  | RAB29    | 8934   | ENSG00000117280 | validated |
| tarbase | hsa-miR-15b-5p  | ID3      | 3399   | ENSG00000117318 | validated |
| tarbase | hsa-miR-296-5p  | ID3      | 3399   | ENSG00000117318 | validated |
| tarbase | hsa-miR-212-3p  | ID3      | 3399   | ENSG00000117318 | validated |
| tarbase | hsa-miR-582-5p  | CR2      | 1380   | ENSG00000117322 | validated |
| tarbase | hsa-miR-106b-5p | CD46     | 4179   | ENSG00000117335 | validated |
| tarbase | hsa-miR-15b-5p  | CD46     | 4179   | ENSG00000117335 | validated |
| tarbase | hsa-miR-106b-5p | APH1A    | 51107  | ENSG00000117362 | validated |
| tarbase | hsa-miR-15b-5p  | APH1A    | 51107  | ENSG00000117362 | validated |
| tarbase | hsa-miR-18a-5p  | APH1A    | 51107  | ENSG00000117362 | validated |
| tarbase | hsa-miR-21-5p   | APH1A    | 51107  | ENSG00000117362 | validated |
| tarbase | hsa-miR-301a-3p | APH1A    | 51107  | ENSG00000117362 | validated |
| tarbase | hsa-miR-15b-5p  | IPO13    | 9670   | ENSG00000117408 | validated |
| tarbase | hsa-miR-181a-5p | IPO13    | 9670   | ENSG00000117408 | validated |
| tarbase | hsa-miR-15b-5p  | ATP6V0B  | 533    | ENSG00000117410 | validated |
| tarbase | hsa-miR-15b-5p  | AKR1A1   | 10327  | ENSG00000117448 | validated |
| tarbase | hsa-miR-21-5p   | AKR1A1   | 10327  | ENSG00000117448 | validated |
| tarbase | hsa-miR-18a-5p  | PRDX1    | 5052   | ENSG00000117450 | validated |
| tarbase | hsa-miR-181a-5p | PIK3R3   | 8503   | ENSG00000117461 | validated |
| tarbase | hsa-miR-582-5p  | PIK3R3   | 8503   | ENSG00000117461 | validated |
| tarbase | hsa-miR-212-3p  | PIK3R3   | 8503   | ENSG00000117461 | validated |
| tarbase | hsa-miR-15b-5p  | SLC19A2  | 10560  | ENSG00000117479 | validated |
| tarbase | hsa-miR-212-3p  | TMED5    | 50999  | ENSG00000117500 | validated |
| tarbase | hsa-miR-15b-5p  | DR1      | 1810   | ENSG00000117505 | validated |
| tarbase | hsa-miR-18a-5p  | DR1      | 1810   | ENSG00000117505 | validated |
| tarbase | hsa-miR-181a-5p | DR1      | 1810   | ENSG00000117505 | validated |
| tarbase | hsa-miR-106b-5p | PRRC2C   | 23215  | ENSG00000117523 | validated |
| tarbase | hsa-miR-192-5p  | PRRC2C   | 23215  | ENSG00000117523 | validated |
| tarbase | hsa-miR-21-5p   | PRRC2C   | 23215  | ENSG00000117523 | validated |
| tarbase | hsa-miR-181a-5p | F3       | 2152   | ENSG00000117525 | validated |
| tarbase | hsa-miR-106b-5p | DPH5     | 51611  | ENSG00000117543 | validated |
| tarbase | hsa-miR-301a-3p | DPH5     | 51611  | ENSG00000117543 | validated |
| tarbase | hsa-miR-181a-5p | PTBP2    | 58155  | ENSG00000117569 | validated |
| tarbase | hsa-miR-212-3p  | PTBP2    | 58155  | ENSG00000117569 | validated |



|         |                 |          |        |                 |           |
|---------|-----------------|----------|--------|-----------------|-----------|
| tarbase | hsa-miR-212-3p  | TNFSF4   | 7292   | ENSG00000117586 | validated |
| tarbase | hsa-miR-181a-5p | PRDX6    | 9588   | ENSG00000117592 | validated |
| tarbase | hsa-miR-301a-3p | IRF6     | 3664   | ENSG00000117595 | validated |
| tarbase | hsa-miR-15b-5p  | UTP25    | 27042  | ENSG00000117597 | validated |
| tarbase | hsa-miR-181a-5p | UTP25    | 27042  | ENSG00000117597 | validated |
| tarbase | hsa-miR-192-5p  | UTP25    | 27042  | ENSG00000117597 | validated |
| tarbase | hsa-miR-181a-5p | PLPPR4   | 9890   | ENSG00000117600 | validated |
| tarbase | hsa-miR-181a-5p | SLC35A3  | 23443  | ENSG00000117620 | validated |
| tarbase | hsa-miR-181a-5p | RCOR3    | 55758  | ENSG00000117625 | validated |
| tarbase | hsa-miR-212-3p  | RCOR3    | 55758  | ENSG00000117625 | validated |
| tarbase | hsa-miR-181a-5p | STMN1    | 3925   | ENSG00000117632 | validated |
| tarbase | hsa-miR-18a-5p  | STMN1    | 3925   | ENSG00000117632 | validated |
| tarbase | hsa-miR-21-5p   | STMN1    | 3925   | ENSG00000117632 | validated |
| tarbase | hsa-miR-106b-5p | MAN1C1   | 57134  | ENSG00000117643 | validated |
| tarbase | hsa-miR-106b-5p | DHDDS    | 79947  | ENSG00000117682 | validated |
| tarbase | hsa-miR-18a-5p  | DHDDS    | 79947  | ENSG00000117682 | validated |
| tarbase | hsa-miR-582-3p  | DHDDS    | 79947  | ENSG00000117682 | validated |
| tarbase | hsa-miR-212-3p  | ARID1A   | 8289   | ENSG00000117713 | validated |
| tarbase | hsa-miR-582-5p  | ARID1A   | 8289   | ENSG00000117713 | validated |
| tarbase | hsa-miR-181a-5p | ARID1A   | 8289   | ENSG00000117713 | validated |
| tarbase | hsa-miR-106b-5p | CENPF    | 1063   | ENSG00000117724 | validated |
| tarbase | hsa-miR-181a-5p | CENPF    | 1063   | ENSG00000117724 | validated |
| tarbase | hsa-miR-301a-3p | CENPF    | 1063   | ENSG00000117724 | validated |
| tarbase | hsa-miR-212-3p  | CENPF    | 1063   | ENSG00000117724 | validated |
| tarbase | hsa-miR-15b-5p  | RPA2     | 6118   | ENSG00000117748 | validated |
| tarbase | hsa-miR-301a-3p | RPA2     | 6118   | ENSG00000117748 | validated |
| tarbase | hsa-miR-326     | PPP1R8   | 5511   | ENSG00000117751 | validated |
| tarbase | hsa-miR-181a-5p | STX12    | 23673  | ENSG00000117758 | validated |
| tarbase | hsa-miR-212-3p  | STX12    | 23673  | ENSG00000117758 | validated |
| tarbase | hsa-miR-582-5p  | STX12    | 23673  | ENSG00000117758 | validated |
| tarbase | hsa-miR-106b-5p | OSBPL9   | 114883 | ENSG00000117859 | validated |
| tarbase | hsa-miR-181a-5p | TXNDC12  | 51060  | ENSG00000117862 | validated |
| tarbase | hsa-miR-18a-5p  | TXNDC12  | 51060  | ENSG00000117862 | validated |
| tarbase | hsa-miR-582-5p  | TXNDC12  | 51060  | ENSG00000117862 | validated |
| tarbase | hsa-miR-326     | MESD     | 23184  | ENSG00000117899 | validated |
| tarbase | hsa-miR-181a-5p | CTSD     | 1509   | ENSG00000117984 | validated |
| tarbase | hsa-miR-296-5p  | CTSD     | 1509   | ENSG00000117984 | validated |
| tarbase | hsa-miR-106b-5p | STK11    | 6794   | ENSG00000118046 | validated |
| tarbase | hsa-miR-15b-5p  | STK11    | 6794   | ENSG00000118046 | validated |
| tarbase | hsa-miR-15b-5p  | KMT2A    | 4297   | ENSG00000118058 | validated |
| tarbase | hsa-miR-181a-5p | KMT2A    | 4297   | ENSG00000118058 | validated |
| tarbase | hsa-miR-18a-5p  | KMT2A    | 4297   | ENSG00000118058 | validated |
| tarbase | hsa-miR-21-5p   | KMT2A    | 4297   | ENSG00000118058 | validated |
| tarbase | hsa-miR-301a-3p | KMT2A    | 4297   | ENSG00000118058 | validated |
| tarbase | hsa-miR-212-3p  | TREH     | 11181  | ENSG00000118094 | validated |
| tarbase | hsa-miR-15b-5p  | RPS25    | 6230   | ENSG00000118181 | validated |
| tarbase | hsa-miR-582-5p  | RPS25    | 6230   | ENSG00000118181 | validated |
| tarbase | hsa-miR-106b-5p | KIF14    | 9928   | ENSG00000118193 | validated |
| tarbase | hsa-miR-15b-5p  | KIF14    | 9928   | ENSG00000118193 | validated |
| tarbase | hsa-miR-18a-5p  | KIF14    | 9928   | ENSG00000118193 | validated |
| tarbase | hsa-miR-301a-3p | KIF14    | 9928   | ENSG00000118193 | validated |
| tarbase | hsa-miR-212-3p  | KIF14    | 9928   | ENSG00000118193 | validated |
| tarbase | hsa-miR-106b-5p | CAMSAP2  | 23271  | ENSG00000118200 | validated |
| tarbase | hsa-miR-144-3p  | CAMSAP2  | 23271  | ENSG00000118200 | validated |
| tarbase | hsa-miR-15b-5p  | CAMSAP2  | 23271  | ENSG00000118200 | validated |
| tarbase | hsa-miR-181a-5p | CAMSAP2  | 23271  | ENSG00000118200 | validated |
| tarbase | hsa-miR-15b-5p  | ATF6     | 22926  | ENSG00000118217 | validated |
| tarbase | hsa-miR-106b-5p | FASTKD2  | 22868  | ENSG00000118246 | validated |
| tarbase | hsa-miR-15b-5p  | CREB1    | 1385   | ENSG00000118260 | validated |
| tarbase | hsa-miR-181a-5p | CREB1    | 1385   | ENSG00000118260 | validated |
| tarbase | hsa-miR-15b-5p  | KLF7     | 8609   | ENSG00000118263 | validated |
| tarbase | hsa-miR-212-3p  | KLF7     | 8609   | ENSG00000118263 | validated |
| tarbase | hsa-miR-21-5p   | KLF7     | 8609   | ENSG00000118263 | validated |
| tarbase | hsa-miR-181a-5p | B4GALT6  | 9331   | ENSG00000118276 | validated |
| tarbase | hsa-miR-582-5p  | C1orf54  | 79630  | ENSG00000118292 | validated |
| tarbase | hsa-miR-212-3p  | CASC1    | 55259  | ENSG00000118307 | validated |
| tarbase | hsa-miR-212-3p  | FILIP1   | 27145  | ENSG00000118407 | validated |
| tarbase | hsa-miR-212-3p  | CASP8AP2 | 9994   | ENSG00000118412 | validated |
| tarbase | hsa-miR-21-5p   | HMG3     | 9324   | ENSG00000118418 | validated |
| tarbase | hsa-miR-18a-5p  | ANKRD13C | 81573  | ENSG00000118454 | validated |
| tarbase | hsa-miR-301a-3p | ANKRD13C | 81573  | ENSG00000118454 | validated |

|         |                 |          |        |                 |           |
|---------|-----------------|----------|--------|-----------------|-----------|
| tarbase | hsa-miR-15b-5p  | PHF3     | 23469  | ENSG00000118482 | validated |
| tarbase | hsa-miR-181a-5p | PHF3     | 23469  | ENSG00000118482 | validated |
| tarbase | hsa-miR-212-3p  | PHF3     | 23469  | ENSG00000118482 | validated |
| tarbase | hsa-miR-106b-5p | FBXO30   | 84085  | ENSG00000118496 | validated |
| tarbase | hsa-miR-144-3p  | FBXO30   | 84085  | ENSG00000118496 | validated |
| tarbase | hsa-miR-181a-5p | FBXO30   | 84085  | ENSG00000118496 | validated |
| tarbase | hsa-miR-18a-5p  | FBXO30   | 84085  | ENSG00000118496 | validated |
| tarbase | hsa-miR-301a-3p | FBXO30   | 84085  | ENSG00000118496 | validated |
| tarbase | hsa-miR-106b-5p | TNFAIP3  | 7128   | ENSG00000118503 | validated |
| tarbase | hsa-miR-212-3p  | TNFAIP3  | 7128   | ENSG00000118503 | validated |
| tarbase | hsa-miR-15b-5p  | MYB      | 4602   | ENSG00000118513 | validated |
| tarbase | hsa-miR-15b-5p  | SGK1     | 6446   | ENSG00000118515 | validated |
| tarbase | hsa-miR-505-3p  | SGK1     | 6446   | ENSG00000118515 | validated |
| tarbase | hsa-miR-181a-5p | RNF146   | 81847  | ENSG00000118518 | validated |
| tarbase | hsa-miR-181a-5p | CCN2     | 1490   | ENSG00000118523 | validated |
| tarbase | hsa-miR-192-5p  | CCN2     | 1490   | ENSG00000118523 | validated |
| tarbase | hsa-miR-212-3p  | CCN2     | 1490   | ENSG00000118523 | validated |
| tarbase | hsa-miR-21-5p   | FBXL5    | 26234  | ENSG00000118564 | validated |
| tarbase | hsa-miR-301a-3p | FBXL5    | 26234  | ENSG00000118564 | validated |
| tarbase | hsa-miR-106b-5p | MED28    | 80306  | ENSG00000118579 | validated |
| tarbase | hsa-miR-18a-5p  | MED28    | 80306  | ENSG00000118579 | validated |
| tarbase | hsa-miR-21-5p   | MED28    | 80306  | ENSG00000118579 | validated |
| tarbase | hsa-miR-301a-3p | SLC16A7  | 9194   | ENSG00000118596 | validated |
| tarbase | hsa-miR-18a-5p  | ZNF430   | 80264  | ENSG00000118620 | validated |
| tarbase | hsa-miR-15b-5p  | VAMP8    | 8673   | ENSG00000118640 | validated |
| tarbase | hsa-miR-18a-5p  | DCLRE1B  | 64858  | ENSG00000118655 | validated |
| tarbase | hsa-miR-212-3p  | ARMC2    | 84071  | ENSG00000118690 | validated |
| tarbase | hsa-miR-181a-5p | RPN2     | 6185   | ENSG00000118705 | validated |
| tarbase | hsa-miR-15b-5p  | TGIF2    | 60436  | ENSG00000118707 | validated |
| tarbase | hsa-miR-18a-5p  | TGIF2    | 60436  | ENSG00000118707 | validated |
| tarbase | hsa-miR-582-5p  | TGIF2    | 60436  | ENSG00000118707 | validated |
| tarbase | hsa-miR-181a-5p | PKD2     | 5311   | ENSG00000118762 | validated |
| tarbase | hsa-miR-18a-5p  | PKD2     | 5311   | ENSG00000118762 | validated |
| tarbase | hsa-miR-181a-5p | SPP1     | 6696   | ENSG00000118785 | validated |
| tarbase | hsa-miR-181a-5p | STBD1    | 8987   | ENSG00000118804 | validated |
| tarbase | hsa-miR-106b-5p | CCNI     | 10983  | ENSG00000118816 | validated |
| tarbase | hsa-miR-181a-5p | CCNI     | 10983  | ENSG00000118816 | validated |
| tarbase | hsa-miR-18a-5p  | CCNI     | 10983  | ENSG00000118816 | validated |
| tarbase | hsa-miR-21-5p   | CCNI     | 10983  | ENSG00000118816 | validated |
| tarbase | hsa-miR-21-5p   | RAB3GAP2 | 25782  | ENSG00000118873 | validated |
| tarbase | hsa-miR-296-5p  | RAB3GAP2 | 25782  | ENSG00000118873 | validated |
| tarbase | hsa-miR-301a-3p | RAB3GAP2 | 25782  | ENSG00000118873 | validated |
| tarbase | hsa-miR-582-3p  | PPL      | 5493   | ENSG00000118898 | validated |
| tarbase | hsa-miR-21-5p   | UBN1     | 29855  | ENSG00000118900 | validated |
| tarbase | hsa-miR-106b-5p | KLF12    | 11278  | ENSG00000118922 | validated |
| tarbase | hsa-miR-582-5p  | KLF12    | 11278  | ENSG00000118922 | validated |
| tarbase | hsa-miR-212-3p  | KLF12    | 11278  | ENSG00000118922 | validated |
| tarbase | hsa-miR-192-5p  | UCHL3    | 7347   | ENSG00000118939 | validated |
| tarbase | hsa-miR-21-5p   | UCHL3    | 7347   | ENSG00000118939 | validated |
| tarbase | hsa-miR-21-5p   | PCDH17   | 27253  | ENSG00000118946 | validated |
| tarbase | hsa-miR-181a-5p | PCDH17   | 27253  | ENSG00000118946 | validated |
| tarbase | hsa-miR-296-5p  | LDAH     | 60526  | ENSG00000118961 | validated |
| tarbase | hsa-miR-144-3p  | CCND2    | 894    | ENSG00000118971 | validated |
| tarbase | hsa-miR-18a-5p  | CCND2    | 894    | ENSG00000118971 | validated |
| tarbase | hsa-miR-21-5p   | CCND2    | 894    | ENSG00000118971 | validated |
| tarbase | hsa-miR-326     | CCND2    | 894    | ENSG00000118971 | validated |
| tarbase | hsa-miR-582-3p  | CCND2    | 894    | ENSG00000118971 | validated |
| tarbase | hsa-miR-582-5p  | CCND2    | 894    | ENSG00000118971 | validated |
| tarbase | hsa-miR-15b-5p  | ELL2     | 22936  | ENSG00000118985 | validated |
| tarbase | hsa-miR-212-3p  | DNAH7    | 56171  | ENSG00000118997 | validated |
| tarbase | hsa-miR-106b-5p | CYP20A1  | 57404  | ENSG00000119004 | validated |
| tarbase | hsa-miR-181a-5p | SATB2    | 23314  | ENSG00000119042 | validated |
| tarbase | hsa-miR-18a-5p  | SATB2    | 23314  | ENSG00000119042 | validated |
| tarbase | hsa-miR-106b-5p | UBE2B    | 7320   | ENSG00000119048 | validated |
| tarbase | hsa-miR-181a-5p | UBE2B    | 7320   | ENSG00000119048 | validated |
| tarbase | hsa-miR-18a-5p  | UBE2B    | 7320   | ENSG00000119048 | validated |
| tarbase | hsa-miR-181a-5p | GDA      | 9615   | ENSG00000119125 | validated |
| tarbase | hsa-miR-505-3p  | KLF9     | 687    | ENSG00000119138 | validated |
| tarbase | hsa-miR-15b-5p  | SEN5P    | 205564 | ENSG00000119231 | validated |
| tarbase | hsa-miR-192-5p  | SEN5P    | 205564 | ENSG00000119231 | validated |
| tarbase | hsa-miR-212-3p  | SEN5P    | 205564 | ENSG00000119231 | validated |

|         |                 |          |        |                 |           |
|---------|-----------------|----------|--------|-----------------|-----------|
| tarbase | hsa-miR-106b-5p | C1orf198 | 84886  | ENSG00000119280 | validated |
| tarbase | hsa-miR-296-5p  | C1orf198 | 84886  | ENSG00000119280 | validated |
| tarbase | hsa-miR-301a-3p | HEATR1   | 55127  | ENSG00000119285 | validated |
| tarbase | hsa-miR-18a-5p  | PTBP3    | 9991   | ENSG00000119314 | validated |
| tarbase | hsa-miR-301a-3p | PTBP3    | 9991   | ENSG00000119314 | validated |
| tarbase | hsa-miR-582-3p  | PTBP3    | 9991   | ENSG00000119314 | validated |
| tarbase | hsa-miR-181a-5p | RAD23B   | 5887   | ENSG00000119318 | validated |
| tarbase | hsa-miR-582-3p  | RAD23B   | 5887   | ENSG00000119318 | validated |
| tarbase | hsa-miR-212-3p  | CTNNAL1  | 8727   | ENSG00000119326 | validated |
| tarbase | hsa-miR-212-3p  | ABITRAM  | 54942  | ENSG00000119328 | validated |
| tarbase | hsa-miR-106b-5p | PTPA     | 5524   | ENSG00000119383 | validated |
| tarbase | hsa-miR-15b-5p  | PTPA     | 5524   | ENSG00000119383 | validated |
| tarbase | hsa-miR-192-5p  | PTPA     | 5524   | ENSG00000119383 | validated |
| tarbase | hsa-miR-15b-5p  | RAB14    | 51552  | ENSG00000119396 | validated |
| tarbase | hsa-miR-18a-5p  | RAB14    | 51552  | ENSG00000119396 | validated |
| tarbase | hsa-miR-192-5p  | RAB14    | 51552  | ENSG00000119396 | validated |
| tarbase | hsa-miR-222-3p  | TRIM32   | 22954  | ENSG00000119401 | validated |
| tarbase | hsa-miR-15b-5p  | FBXW2    | 26190  | ENSG00000119402 | validated |
| tarbase | hsa-miR-18a-5p  | PHF19    | 26147  | ENSG00000119403 | validated |
| tarbase | hsa-miR-181a-5p | PPP6C    | 5537   | ENSG00000119414 | validated |
| tarbase | hsa-miR-21-5p   | PPP6C    | 5537   | ENSG00000119414 | validated |
| tarbase | hsa-miR-582-3p  | NDUFA8   | 4702   | ENSG00000119421 | validated |
| tarbase | hsa-miR-144-3p  | HSDL2    | 84263  | ENSG00000119471 | validated |
| tarbase | hsa-miR-15b-5p  | HSDL2    | 84263  | ENSG00000119471 | validated |
| tarbase | hsa-miR-15b-5p  | MAPKAP1  | 79109  | ENSG00000119487 | validated |
| tarbase | hsa-miR-301a-3p | MAPKAP1  | 79109  | ENSG00000119487 | validated |
| tarbase | hsa-miR-106b-5p | ALG2     | 85365  | ENSG00000119523 | validated |
| tarbase | hsa-miR-15b-5p  | KDSR     | 2531   | ENSG00000119537 | validated |
| tarbase | hsa-miR-18a-5p  | KDSR     | 2531   | ENSG00000119537 | validated |
| tarbase | hsa-miR-582-5p  | KDSR     | 2531   | ENSG00000119537 | validated |
| tarbase | hsa-miR-15b-5p  | ONECUT2  | 9480   | ENSG00000119547 | validated |
| tarbase | hsa-miR-181a-5p | ONECUT2  | 9480   | ENSG00000119547 | validated |
| tarbase | hsa-miR-192-5p  | C19orf25 | 148223 | ENSG00000119559 | validated |
| tarbase | hsa-miR-15b-5p  | ZBTB45   | 84878  | ENSG00000119574 | validated |
| tarbase | hsa-miR-18a-5p  | YLPM1    | 56252  | ENSG00000119596 | validated |
| tarbase | hsa-miR-212-3p  | BBOF1    | 80127  | ENSG00000119636 | validated |
| tarbase | hsa-miR-212-3p  | ACYP1    | 97     | ENSG00000119640 | validated |
| tarbase | hsa-miR-18a-5p  | DNAL1    | 83544  | ENSG00000119661 | validated |
| tarbase | hsa-miR-15b-5p  | IRF2BPL  | 64207  | ENSG00000119669 | validated |
| tarbase | hsa-miR-21-5p   | IRF2BPL  | 64207  | ENSG00000119669 | validated |
| tarbase | hsa-miR-582-5p  | IRF2BPL  | 64207  | ENSG00000119669 | validated |
| tarbase | hsa-miR-212-3p  | IRF2BPL  | 64207  | ENSG00000119669 | validated |
| tarbase | hsa-miR-106b-5p | AREL1    | 9870   | ENSG00000119682 | validated |
| tarbase | hsa-miR-15b-5p  | AREL1    | 9870   | ENSG00000119682 | validated |
| tarbase | hsa-miR-181a-5p | AREL1    | 9870   | ENSG00000119682 | validated |
| tarbase | hsa-miR-181a-5p | MLH3     | 27030  | ENSG00000119684 | validated |
| tarbase | hsa-miR-15b-5p  | FLVCR2   | 55640  | ENSG00000119686 | validated |
| tarbase | hsa-miR-181a-5p | DLST     | 1743   | ENSG00000119689 | validated |
| tarbase | hsa-miR-144-3p  | RBM25    | 58517  | ENSG00000119707 | validated |
| tarbase | hsa-miR-15b-5p  | RBM25    | 58517  | ENSG00000119707 | validated |
| tarbase | hsa-miR-301a-3p | RBM25    | 58517  | ENSG00000119707 | validated |
| tarbase | hsa-miR-326     | RBM25    | 58517  | ENSG00000119707 | validated |
| tarbase | hsa-miR-326     | KLHL29   | 114818 | ENSG00000119771 | validated |
| tarbase | hsa-miR-181a-5p | DNMT3A   | 1788   | ENSG00000119772 | validated |
| tarbase | hsa-miR-106b-5p | TMEM214  | 54867  | ENSG00000119777 | validated |
| tarbase | hsa-miR-15b-5p  | TMEM214  | 54867  | ENSG00000119777 | validated |
| tarbase | hsa-miR-181a-5p | ATAD2B   | 54454  | ENSG00000119778 | validated |
| tarbase | hsa-miR-301a-3p | ATAD2B   | 54454  | ENSG00000119778 | validated |
| tarbase | hsa-miR-212-3p  | ATAD2B   | 54454  | ENSG00000119778 | validated |
| tarbase | hsa-miR-144-3p  | ATL2     | 64225  | ENSG00000119787 | validated |
| tarbase | hsa-miR-181a-5p | ATL2     | 64225  | ENSG00000119787 | validated |
| tarbase | hsa-miR-18a-5p  | ATL2     | 64225  | ENSG00000119787 | validated |
| tarbase | hsa-miR-582-5p  | ATL2     | 64225  | ENSG00000119787 | validated |
| tarbase | hsa-miR-212-3p  | ATL2     | 64225  | ENSG00000119787 | validated |
| tarbase | hsa-miR-18a-5p  | YPEL5    | 51646  | ENSG00000119801 | validated |
| tarbase | hsa-miR-15b-5p  | FAM98A   | 25940  | ENSG00000119812 | validated |
| tarbase | hsa-miR-181a-5p | FAM98A   | 25940  | ENSG00000119812 | validated |
| tarbase | hsa-miR-181a-5p | YIPF4    | 84272  | ENSG00000119820 | validated |
| tarbase | hsa-miR-326     | AFTPH    | 54812  | ENSG00000119844 | validated |
| tarbase | hsa-miR-106b-5p | LGALS1   | 29094  | ENSG00000119862 | validated |
| tarbase | hsa-miR-301a-3p | LGALS1   | 29094  | ENSG00000119862 | validated |

|         |                 |          |        |                 |           |
|---------|-----------------|----------|--------|-----------------|-----------|
| tarbase | hsa-miR-21-5p   | BCL11A   | 53335  | ENSG00000119866 | validated |
| tarbase | hsa-miR-301a-3p | BCL11A   | 53335  | ENSG00000119866 | validated |
| tarbase | hsa-miR-106b-5p | CRIP1    | 9419   | ENSG00000119878 | validated |
| tarbase | hsa-miR-106b-5p | SLC17A5  | 26503  | ENSG00000119899 | validated |
| tarbase | hsa-miR-15b-5p  | SLC17A5  | 26503  | ENSG00000119899 | validated |
| tarbase | hsa-miR-106b-5p | OGFRL1   | 79627  | ENSG00000119900 | validated |
| tarbase | hsa-miR-15b-5p  | OGFRL1   | 79627  | ENSG00000119900 | validated |
| tarbase | hsa-miR-181a-5p | OGFRL1   | 79627  | ENSG00000119900 | validated |
| tarbase | hsa-miR-222-3p  | SLF2     | 55719  | ENSG00000119906 | validated |
| tarbase | hsa-miR-301a-3p | SLF2     | 55719  | ENSG00000119906 | validated |
| tarbase | hsa-miR-582-5p  | IDE      | 3416   | ENSG00000119912 | validated |
| tarbase | hsa-miR-212-3p  | ELOVL3   | 83401  | ENSG00000119915 | validated |
| tarbase | hsa-miR-15b-5p  | IFIT3    | 3437   | ENSG00000119917 | validated |
| tarbase | hsa-miR-212-3p  | IFIT3    | 3437   | ENSG00000119917 | validated |
| tarbase | hsa-miR-222-3p  | IFIT2    | 3433   | ENSG00000119922 | validated |
| tarbase | hsa-miR-212-3p  | IFIT2    | 3433   | ENSG00000119922 | validated |
| tarbase | hsa-miR-15b-5p  | GPAM     | 57678  | ENSG00000119927 | validated |
| tarbase | hsa-miR-212-3p  | PYROXD2  | 84795  | ENSG00000119943 | validated |
| tarbase | hsa-miR-181a-5p | SMNDC1   | 10285  | ENSG00000119953 | validated |
| tarbase | hsa-miR-18a-5p  | C10orf88 | 80007  | ENSG00000119965 | validated |
| tarbase | hsa-miR-106b-5p | C10orf88 | 80007  | ENSG00000119965 | validated |
| tarbase | hsa-miR-15b-5p  | HELLS    | 3070   | ENSG00000119969 | validated |
| tarbase | hsa-miR-181a-5p | HELLS    | 3070   | ENSG00000119969 | validated |
| tarbase | hsa-miR-582-5p  | HELLS    | 3070   | ENSG00000119969 | validated |
| tarbase | hsa-miR-181a-5p | TCTN3    | 26123  | ENSG00000119977 | validated |
| tarbase | hsa-miR-326     | WDR11    | 55717  | ENSG00000120008 | validated |
| tarbase | hsa-miR-106b-5p | ARMH3    | 79591  | ENSG00000120029 | validated |
| tarbase | hsa-miR-106b-5p | GNA13    | 10672  | ENSG00000120063 | validated |
| tarbase | hsa-miR-15b-5p  | GNA13    | 10672  | ENSG00000120063 | validated |
| tarbase | hsa-miR-181a-5p | GNA13    | 10672  | ENSG00000120063 | validated |
| tarbase | hsa-miR-212-3p  | GNA13    | 10672  | ENSG00000120063 | validated |
| tarbase | hsa-miR-18a-5p  | KANSL1   | 284058 | ENSG00000120071 | validated |
| tarbase | hsa-miR-301a-3p | KANSL1   | 284058 | ENSG00000120071 | validated |
| tarbase | hsa-miR-192-5p  | HOXB5    | 3215   | ENSG00000120075 | validated |
| tarbase | hsa-miR-106b-5p | HOXB3    | 3213   | ENSG00000120093 | validated |
| tarbase | hsa-miR-582-3p  | HOXB3    | 3213   | ENSG00000120093 | validated |
| tarbase | hsa-miR-18a-5p  | DUSP1    | 1843   | ENSG00000120129 | validated |
| tarbase | hsa-miR-144-3p  | PANK3    | 79646  | ENSG00000120137 | validated |
| tarbase | hsa-miR-181a-5p | PANK3    | 79646  | ENSG00000120137 | validated |
| tarbase | hsa-miR-18a-5p  | PANK3    | 79646  | ENSG00000120137 | validated |
| tarbase | hsa-miR-212-3p  | PANK3    | 79646  | ENSG00000120137 | validated |
| tarbase | hsa-miR-21-5p   | PANK3    | 79646  | ENSG00000120137 | validated |
| tarbase | hsa-miR-301a-3p | PANK3    | 79646  | ENSG00000120137 | validated |
| tarbase | hsa-miR-582-5p  | PANK3    | 79646  | ENSG00000120137 | validated |
| tarbase | hsa-miR-21-5p   | TEK      | 7010   | ENSG00000120156 | validated |
| tarbase | hsa-miR-181a-5p | TEK      | 7010   | ENSG00000120156 | validated |
| tarbase | hsa-miR-15b-5p  | CAAP1    | 79886  | ENSG00000120159 | validated |
| tarbase | hsa-miR-15b-5p  | MOB3B    | 79817  | ENSG00000120162 | validated |
| tarbase | hsa-miR-106b-5p | MOB3B    | 79817  | ENSG00000120162 | validated |
| tarbase | hsa-miR-106b-5p | CD274    | 29126  | ENSG00000120217 | validated |
| tarbase | hsa-miR-301a-3p | CD274    | 29126  | ENSG00000120217 | validated |
| tarbase | hsa-miR-181a-5p | GRIA2    | 2891   | ENSG00000120251 | validated |
| tarbase | hsa-miR-181a-5p | NUP43    | 348995 | ENSG00000120253 | validated |
| tarbase | hsa-miR-222-3p  | NUP43    | 348995 | ENSG00000120253 | validated |
| tarbase | hsa-miR-582-3p  | NUP43    | 348995 | ENSG00000120253 | validated |
| tarbase | hsa-miR-582-5p  | NUP43    | 348995 | ENSG00000120253 | validated |
| tarbase | hsa-miR-181a-5p | MTHFD1L  | 25902  | ENSG00000120254 | validated |
| tarbase | hsa-miR-181a-5p | LRP11    | 84918  | ENSG00000120256 | validated |
| tarbase | hsa-miR-106b-5p | PCMT1    | 5110   | ENSG00000120265 | validated |
| tarbase | hsa-miR-21-5p   | PCMT1    | 5110   | ENSG00000120265 | validated |
| tarbase | hsa-miR-18a-5p  | PLEKHG1  | 57480  | ENSG00000120278 | validated |
| tarbase | hsa-miR-21-5p   | CXorf21  | 80231  | ENSG00000120280 | validated |
| tarbase | hsa-miR-296-5p  | MIRPS14  | 63931  | ENSG00000120333 | validated |
| tarbase | hsa-miR-326     | CENPL    | 91687  | ENSG00000120334 | validated |
| tarbase | hsa-miR-212-3p  | CENPL    | 91687  | ENSG00000120334 | validated |
| tarbase | hsa-miR-212-3p  | GORAB    | 92344  | ENSG00000120370 | validated |
| tarbase | hsa-miR-181a-5p | TCP1     | 6950   | ENSG00000120438 | validated |
| tarbase | hsa-miR-15b-5p  | SLC10A7  | 84068  | ENSG00000120519 | validated |
| tarbase | hsa-miR-15b-5p  | NUDCD1   | 84955  | ENSG00000120526 | validated |
| tarbase | hsa-miR-181a-5p | ENY2     | 56943  | ENSG00000120533 | validated |
| tarbase | hsa-miR-582-5p  | MASTL    | 84930  | ENSG00000120539 | validated |

|         |                 |           |       |                 |           |
|---------|-----------------|-----------|-------|-----------------|-----------|
| tarbase | hsa-miR-106b-5p | PLXDC2    | 84898 | ENSG00000120594 | validated |
| tarbase | hsa-miR-15b-5p  | EPC1      | 80314 | ENSG00000120616 | validated |
| tarbase | hsa-miR-181a-5p | EPC1      | 80314 | ENSG00000120616 | validated |
| tarbase | hsa-miR-301a-3p | EPC1      | 80314 | ENSG00000120616 | validated |
| tarbase | hsa-miR-106b-5p | PROSER1   | 80209 | ENSG00000120685 | validated |
| tarbase | hsa-miR-18a-5p  | PROSER1   | 80209 | ENSG00000120685 | validated |
| tarbase | hsa-miR-212-3p  | PROSER1   | 80209 | ENSG00000120685 | validated |
| tarbase | hsa-miR-181a-5p | PROSER1   | 80209 | ENSG00000120685 | validated |
| tarbase | hsa-miR-212-3p  | ELF1      | 1997  | ENSG00000120690 | validated |
| tarbase | hsa-miR-222-3p  | ELF1      | 1997  | ENSG00000120690 | validated |
| tarbase | hsa-miR-144-3p  | HSPH1     | 10808 | ENSG00000120694 | validated |
| tarbase | hsa-miR-15b-5p  | HSPH1     | 10808 | ENSG00000120694 | validated |
| tarbase | hsa-miR-18a-5p  | HSPH1     | 10808 | ENSG00000120694 | validated |
| tarbase | hsa-miR-212-3p  | HSPH1     | 10808 | ENSG00000120694 | validated |
| tarbase | hsa-miR-505-3p  | HSPH1     | 10808 | ENSG00000120694 | validated |
| tarbase | hsa-miR-181a-5p | KBTBD7    | 84078 | ENSG00000120696 | validated |
| tarbase | hsa-miR-181a-5p | ETF1      | 2107  | ENSG00000120705 | validated |
| tarbase | hsa-miR-326     | ETF1      | 2107  | ENSG00000120705 | validated |
| tarbase | hsa-miR-582-3p  | ETF1      | 2107  | ENSG00000120705 | validated |
| tarbase | hsa-miR-212-3p  | TGFBI     | 7045  | ENSG00000120708 | validated |
| tarbase | hsa-miR-21-5p   | FAM53C    | 51307 | ENSG00000120709 | validated |
| tarbase | hsa-miR-181a-5p | SIL1      | 64374 | ENSG00000120725 | validated |
| tarbase | hsa-miR-212-3p  | PAIP2     | 51247 | ENSG00000120727 | validated |
| tarbase | hsa-miR-21-5p   | PAIP2     | 51247 | ENSG00000120727 | validated |
| tarbase | hsa-miR-106b-5p | EGR1      | 1958  | ENSG00000120738 | validated |
| tarbase | hsa-miR-21-5p   | EGR1      | 1958  | ENSG00000120738 | validated |
| tarbase | hsa-miR-106b-5p | SERP1     | 27230 | ENSG00000120742 | validated |
| tarbase | hsa-miR-212-3p  | SERP1     | 27230 | ENSG00000120742 | validated |
| tarbase | hsa-miR-181a-5p | SERP1     | 27230 | ENSG00000120742 | validated |
| tarbase | hsa-miR-582-5p  | PLS1      | 5357  | ENSG00000120756 | validated |
| tarbase | hsa-miR-181a-5p | ZFP30     | 22835 | ENSG00000120784 | validated |
| tarbase | hsa-miR-106b-5p | NR2C1     | 7181  | ENSG00000120798 | validated |
| tarbase | hsa-miR-301a-3p | NR2C1     | 7181  | ENSG00000120798 | validated |
| tarbase | hsa-miR-181a-5p | UTP20     | 27340 | ENSG00000120800 | validated |
| tarbase | hsa-miR-181a-5p | TMPO      | 7112  | ENSG00000120802 | validated |
| tarbase | hsa-miR-18a-5p  | TMPO      | 7112  | ENSG00000120802 | validated |
| tarbase | hsa-miR-21-5p   | TMPO      | 7112  | ENSG00000120802 | validated |
| tarbase | hsa-miR-212-3p  | ARL1      | 400   | ENSG00000120805 | validated |
| tarbase | hsa-miR-21-5p   | ARL1      | 400   | ENSG00000120805 | validated |
| tarbase | hsa-miR-181a-5p | ARL1      | 400   | ENSG00000120805 | validated |
| tarbase | hsa-miR-222-3p  | NFYB      | 4801  | ENSG00000120837 | validated |
| tarbase | hsa-miR-106b-5p | APAF1     | 317   | ENSG00000120868 | validated |
| tarbase | hsa-miR-181a-5p | APAF1     | 317   | ENSG00000120868 | validated |
| tarbase | hsa-miR-181a-5p | DUSP4     | 1846  | ENSG00000120875 | validated |
| tarbase | hsa-miR-15b-5p  | TNFRSF10B | 8795  | ENSG00000120889 | validated |
| tarbase | hsa-miR-212-3p  | TNFRSF10B | 8795  | ENSG00000120889 | validated |
| tarbase | hsa-miR-15b-5p  | SORBS3    | 10174 | ENSG00000120896 | validated |
| tarbase | hsa-miR-181a-5p | SORBS3    | 10174 | ENSG00000120896 | validated |
| tarbase | hsa-miR-18a-5p  | SORBS3    | 10174 | ENSG00000120896 | validated |
| tarbase | hsa-miR-106b-5p | PPP3CC    | 5533  | ENSG00000120910 | validated |
| tarbase | hsa-miR-212-3p  | NPPB      | 4879  | ENSG00000120937 | validated |
| tarbase | hsa-miR-106b-5p | UBIAD1    | 29914 | ENSG00000120942 | validated |
| tarbase | hsa-miR-181a-5p | TARDBP    | 23435 | ENSG00000120948 | validated |
| tarbase | hsa-miR-212-3p  | TARDBP    | 23435 | ENSG00000120948 | validated |
| tarbase | hsa-miR-301a-3p | TARDBP    | 23435 | ENSG00000120948 | validated |
| tarbase | hsa-miR-296-5p  | TNFRSF8   | 943   | ENSG00000120949 | validated |
| tarbase | hsa-miR-181a-5p | LYPLA1    | 10434 | ENSG00000120992 | validated |
| tarbase | hsa-miR-18a-5p  | CRISPLD1  | 83690 | ENSG00000121005 | validated |
| tarbase | hsa-miR-21-5p   | COPS5     | 10987 | ENSG00000121022 | validated |
| tarbase | hsa-miR-582-3p  | COPS5     | 10987 | ENSG00000121022 | validated |
| tarbase | hsa-miR-212-3p  | EPX       | 8288  | ENSG00000121053 | validated |
| tarbase | hsa-miR-296-5p  | AKAP1     | 8165  | ENSG00000121057 | validated |
| tarbase | hsa-miR-301a-3p | AKAP1     | 8165  | ENSG00000121057 | validated |
| tarbase | hsa-miR-582-5p  | AKAP1     | 8165  | ENSG00000121057 | validated |
| tarbase | hsa-miR-301a-3p | COIL      | 8161  | ENSG00000121058 | validated |
| tarbase | hsa-miR-301a-3p | TRIM25    | 7706  | ENSG00000121060 | validated |
| tarbase | hsa-miR-212-3p  | TRIM25    | 7706  | ENSG00000121060 | validated |
| tarbase | hsa-miR-106b-5p | SPOP      | 8405  | ENSG00000121067 | validated |
| tarbase | hsa-miR-192-5p  | SPOP      | 8405  | ENSG00000121067 | validated |
| tarbase | hsa-miR-106b-5p | FAM117A   | 81558 | ENSG00000121104 | validated |
| tarbase | hsa-miR-106b-5p | NCAPH     | 23397 | ENSG00000121152 | validated |

|         |                 |         |        |                 |           |
|---------|-----------------|---------|--------|-----------------|-----------|
| tarbase | hsa-miR-582-5p  | TENT4B  | 64282  | ENSG00000121274 | validated |
| tarbase | hsa-miR-192-5p  | ADCY7   | 113    | ENSG00000121281 | validated |
| tarbase | hsa-miR-301a-3p | ADCY7   | 113    | ENSG00000121281 | validated |
| tarbase | hsa-miR-106b-5p | PRB2    | 653247 | ENSG00000121335 | validated |
| tarbase | hsa-miR-582-5p  | IAPP    | 3375   | ENSG00000121351 | validated |
| tarbase | hsa-miR-212-3p  | KCNJ8   | 3764   | ENSG00000121361 | validated |
| tarbase | hsa-miR-18a-5p  | ZNF549  | 256051 | ENSG00000121406 | validated |
| tarbase | hsa-miR-106b-5p | LHX4    | 89884  | ENSG00000121454 | validated |
| tarbase | hsa-miR-106b-5p | RNF2    | 6045   | ENSG00000121481 | validated |
| tarbase | hsa-miR-181a-5p | SEC22A  | 26984  | ENSG00000121542 | validated |
| tarbase | hsa-miR-212-3p  | POPDC2  | 64091  | ENSG00000121577 | validated |
| tarbase | hsa-miR-106b-5p | B4GALT4 | 8702   | ENSG00000121578 | validated |
| tarbase | hsa-miR-18a-5p  | NAA50   | 80218  | ENSG00000121579 | validated |
| tarbase | hsa-miR-326     | NAA50   | 80218  | ENSG00000121579 | validated |
| tarbase | hsa-miR-212-3p  | KIF18A  | 81930  | ENSG00000121621 | validated |
| tarbase | hsa-miR-106b-5p | DES12   | 51029  | ENSG00000121644 | validated |
| tarbase | hsa-miR-18a-5p  | DES12   | 51029  | ENSG00000121644 | validated |
| tarbase | hsa-miR-15b-5p  | PILRB   | 29990  | ENSG00000121716 | validated |
| tarbase | hsa-miR-296-5p  | PILRB   | 29990  | ENSG00000121716 | validated |
| tarbase | hsa-miR-326     | PILRB   | 29990  | ENSG00000121716 | validated |
| tarbase | hsa-miR-106b-5p | ZMYM2   | 7750   | ENSG00000121741 | validated |
| tarbase | hsa-miR-181a-5p | ZMYM2   | 7750   | ENSG00000121741 | validated |
| tarbase | hsa-miR-582-3p  | ZMYM2   | 7750   | ENSG00000121741 | validated |
| tarbase | hsa-miR-15b-5p  | GJB6    | 10804  | ENSG00000121742 | validated |
| tarbase | hsa-miR-15b-5p  | ADGRB2  | 576    | ENSG00000121753 | validated |
| tarbase | hsa-miR-144-3p  | KHDRBS1 | 10657  | ENSG00000121774 | validated |
| tarbase | hsa-miR-181a-5p | KHDRBS1 | 10657  | ENSG00000121774 | validated |
| tarbase | hsa-miR-212-3p  | GHSR    | 2693   | ENSG00000121853 | validated |
| tarbase | hsa-miR-18a-5p  | ZNF639  | 51193  | ENSG00000121864 | validated |
| tarbase | hsa-miR-106b-5p | SLITRK3 | 22865  | ENSG00000121871 | validated |
| tarbase | hsa-miR-15b-5p  | PIK3CA  | 5290   | ENSG00000121879 | validated |
| tarbase | hsa-miR-15b-5p  | PDS5A   | 23244  | ENSG00000121892 | validated |
| tarbase | hsa-miR-18a-5p  | LRIF1   | 55791  | ENSG00000121931 | validated |
| tarbase | hsa-miR-582-5p  | CLCC1   | 23155  | ENSG00000121940 | validated |
| tarbase | hsa-miR-21-5p   | GPSM2   | 29899  | ENSG00000121957 | validated |
| tarbase | hsa-miR-106b-5p | GPSM2   | 29899  | ENSG00000121957 | validated |
| tarbase | hsa-miR-212-3p  | GPSM2   | 29899  | ENSG00000121957 | validated |
| tarbase | hsa-miR-18a-5p  | ACVR2A  | 92     | ENSG00000121989 | validated |
| tarbase | hsa-miR-212-3p  | ACVR2A  | 92     | ENSG00000121989 | validated |
| tarbase | hsa-miR-212-3p  | FLT3    | 2322   | ENSG00000122025 | validated |
| tarbase | hsa-miR-212-3p  | UBL3    | 5412   | ENSG00000122042 | validated |
| tarbase | hsa-miR-582-5p  | UBL3    | 5412   | ENSG00000122042 | validated |
| tarbase | hsa-miR-301a-3p | UBL3    | 5412   | ENSG00000122042 | validated |
| tarbase | hsa-miR-106b-5p | MTERF4  | 130916 | ENSG00000122085 | validated |
| tarbase | hsa-miR-222-3p  | MTERF4  | 130916 | ENSG00000122085 | validated |
| tarbase | hsa-miR-212-3p  | SASH3   | 54440  | ENSG00000122122 | validated |
| tarbase | hsa-miR-301a-3p | OCRL    | 4952   | ENSG00000122126 | validated |
| tarbase | hsa-miR-15b-5p  | MRPS2   | 51116  | ENSG00000122140 | validated |
| tarbase | hsa-miR-144-3p  | COPA    | 1314   | ENSG00000122218 | validated |
| tarbase | hsa-miR-181a-5p | COPA    | 1314   | ENSG00000122218 | validated |
| tarbase | hsa-miR-18a-5p  | COPA    | 1314   | ENSG00000122218 | validated |
| tarbase | hsa-miR-212-3p  | COPA    | 1314   | ENSG00000122218 | validated |
| tarbase | hsa-miR-222-3p  | COPA    | 1314   | ENSG00000122218 | validated |
| tarbase | hsa-miR-15b-5p  | LY9     | 4063   | ENSG00000122224 | validated |
| tarbase | hsa-miR-582-5p  | LY9     | 4063   | ENSG00000122224 | validated |
| tarbase | hsa-miR-106b-5p | RBBP6   | 5930   | ENSG00000122257 | validated |
| tarbase | hsa-miR-18a-5p  | RBBP6   | 5930   | ENSG00000122257 | validated |
| tarbase | hsa-miR-301a-3p | RBBP6   | 5930   | ENSG00000122257 | validated |
| tarbase | hsa-miR-582-5p  | ZC3H7A  | 29066  | ENSG00000122299 | validated |
| tarbase | hsa-miR-15b-5p  | ANXA11  | 311    | ENSG00000122359 | validated |
| tarbase | hsa-miR-21-5p   | ANXA11  | 311    | ENSG00000122359 | validated |
| tarbase | hsa-miR-296-5p  | ANXA11  | 311    | ENSG00000122359 | validated |
| tarbase | hsa-miR-106b-5p | SHLD2   | 54537  | ENSG00000122376 | validated |
| tarbase | hsa-miR-212-3p  | PRXL2A  | 84293  | ENSG00000122378 | validated |
| tarbase | hsa-miR-21-5p   | PRXL2A  | 84293  | ENSG00000122378 | validated |
| tarbase | hsa-miR-212-3p  | ZNF205  | 7755   | ENSG00000122386 | validated |
| tarbase | hsa-miR-181a-5p | ODF2L   | 57489  | ENSG00000122417 | validated |
| tarbase | hsa-miR-106b-5p | ZNF644  | 84146  | ENSG00000122482 | validated |
| tarbase | hsa-miR-181a-5p | ZNF644  | 84146  | ENSG00000122482 | validated |
| tarbase | hsa-miR-18a-5p  | ZNF644  | 84146  | ENSG00000122482 | validated |
| tarbase | hsa-miR-212-3p  | ZNF644  | 84146  | ENSG00000122482 | validated |

|         |                 |           |        |                 |           |
|---------|-----------------|-----------|--------|-----------------|-----------|
| tarbase | hsa-miR-181a-5p | SLC66A2   | 80148  | ENSG00000122490 | validated |
| tarbase | hsa-miR-212-3p  | BBS9      | 27241  | ENSG00000122507 | validated |
| tarbase | hsa-miR-301a-3p | ZMIZ2     | 83637  | ENSG00000122515 | validated |
| tarbase | hsa-miR-106b-5p | KLHL7     | 55975  | ENSG00000122550 | validated |
| tarbase | hsa-miR-106b-5p | CBX3      | 11335  | ENSG00000122565 | validated |
| tarbase | hsa-miR-15b-5p  | CBX3      | 11335  | ENSG00000122565 | validated |
| tarbase | hsa-miR-181a-5p | CBX3      | 11335  | ENSG00000122565 | validated |
| tarbase | hsa-miR-192-5p  | CBX3      | 11335  | ENSG00000122565 | validated |
| tarbase | hsa-miR-106b-5p | HNRNPA2B1 | 3181   | ENSG00000122566 | validated |
| tarbase | hsa-miR-181a-5p | HNRNPA2B1 | 3181   | ENSG00000122566 | validated |
| tarbase | hsa-miR-18a-5p  | HNRNPA2B1 | 3181   | ENSG00000122566 | validated |
| tarbase | hsa-miR-21-5p   | HNRNPA2B1 | 3181   | ENSG00000122566 | validated |
| tarbase | hsa-miR-222-3p  | HNRNPA2B1 | 3181   | ENSG00000122566 | validated |
| tarbase | hsa-miR-326     | HNRNPA2B1 | 3181   | ENSG00000122566 | validated |
| tarbase | hsa-miR-106b-5p | WIPF3     | 644150 | ENSG00000122574 | validated |
| tarbase | hsa-miR-301a-3p | INHBA     | 3624   | ENSG00000122641 | validated |
| tarbase | hsa-miR-212-3p  | INHBA     | 3624   | ENSG00000122641 | validated |
| tarbase | hsa-miR-106b-5p | ARL4A     | 10124  | ENSG00000122644 | validated |
| tarbase | hsa-miR-181a-5p | ARL4A     | 10124  | ENSG00000122644 | validated |
| tarbase | hsa-miR-106b-5p | SMU1      | 55234  | ENSG00000122692 | validated |
| tarbase | hsa-miR-181a-5p | RECK      | 8434   | ENSG00000122707 | validated |
| tarbase | hsa-miR-212-3p  | TAF1L     | 138474 | ENSG00000122728 | validated |
| tarbase | hsa-miR-15b-5p  | ACO1      | 48     | ENSG00000122729 | validated |
| tarbase | hsa-miR-296-5p  | ACO1      | 48     | ENSG00000122729 | validated |
| tarbase | hsa-miR-106b-5p | DCAF10    | 79269  | ENSG00000122741 | validated |
| tarbase | hsa-miR-15b-5p  | DCAF10    | 79269  | ENSG00000122741 | validated |
| tarbase | hsa-miR-326     | DCAF10    | 79269  | ENSG00000122741 | validated |
| tarbase | hsa-miR-21-5p   | KIAA1549  | 57670  | ENSG00000122778 | validated |
| tarbase | hsa-miR-301a-3p | KIAA1549  | 57670  | ENSG00000122778 | validated |
| tarbase | hsa-miR-106b-5p | CALD1     | 800    | ENSG00000122786 | validated |
| tarbase | hsa-miR-181a-5p | CALD1     | 800    | ENSG00000122786 | validated |
| tarbase | hsa-miR-181a-5p | PLAU      | 5328   | ENSG00000122861 | validated |
| tarbase | hsa-miR-18a-5p  | SRGN      | 5552   | ENSG00000122862 | validated |
| tarbase | hsa-miR-326     | CHST3     | 9469   | ENSG00000122863 | validated |
| tarbase | hsa-miR-212-3p  | EGR2      | 1959   | ENSG00000122877 | validated |
| tarbase | hsa-miR-15b-5p  | RBM19     | 9904   | ENSG00000122965 | validated |
| tarbase | hsa-miR-106b-5p | HVCN1     | 84329  | ENSG00000122986 | validated |
| tarbase | hsa-miR-106b-5p | MED13L    | 23389  | ENSG00000123066 | validated |
| tarbase | hsa-miR-192-5p  | MED13L    | 23389  | ENSG00000123066 | validated |
| tarbase | hsa-miR-296-5p  | MED13L    | 23389  | ENSG00000123066 | validated |
| tarbase | hsa-miR-301a-3p | MED13L    | 23389  | ENSG00000123066 | validated |
| tarbase | hsa-miR-106b-5p | CDKN2C    | 1031   | ENSG00000123080 | validated |
| tarbase | hsa-miR-21-5p   | RASSF8    | 11228  | ENSG00000123094 | validated |
| tarbase | hsa-miR-582-5p  | RASSF8    | 11228  | ENSG00000123094 | validated |
| tarbase | hsa-miR-15b-5p  | ITPR2     | 3709   | ENSG00000123104 | validated |
| tarbase | hsa-miR-15b-5p  | NECAB1    | 64168  | ENSG00000123119 | validated |
| tarbase | hsa-miR-18a-5p  | PRDX4     | 10549  | ENSG00000123131 | validated |
| tarbase | hsa-miR-21-5p   | DDX39A    | 10212  | ENSG00000123136 | validated |
| tarbase | hsa-miR-21-5p   | ADGRE5    | 976    | ENSG00000123146 | validated |
| tarbase | hsa-miR-106b-5p | SPRYD7    | 57213  | ENSG00000123178 | validated |
| tarbase | hsa-miR-181a-5p | SPRYD7    | 57213  | ENSG00000123178 | validated |
| tarbase | hsa-miR-181a-5p | NLN       | 57486  | ENSG00000123213 | validated |
| tarbase | hsa-miR-18a-5p  | ATF1      | 466    | ENSG00000123268 | validated |
| tarbase | hsa-miR-181a-5p | ORMDL2    | 29095  | ENSG00000123353 | validated |
| tarbase | hsa-miR-15b-5p  | NR4A1     | 3164   | ENSG00000123358 | validated |
| tarbase | hsa-miR-18a-5p  | HOXC13    | 3229   | ENSG00000123364 | validated |
| tarbase | hsa-miR-326     | HOXC11    | 3227   | ENSG00000123388 | validated |
| tarbase | hsa-miR-301a-3p | ATG101    | 60673  | ENSG00000123395 | validated |
| tarbase | hsa-miR-192-5p  | SMUG1     | 23583  | ENSG00000123415 | validated |
| tarbase | hsa-miR-212-3p  | TUBA1B    | 10376  | ENSG00000123416 | validated |
| tarbase | hsa-miR-212-3p  | KBTBD4    | 55709  | ENSG00000123444 | validated |
| tarbase | hsa-miR-301a-3p | ATPAF1    | 64756  | ENSG00000123472 | validated |
| tarbase | hsa-miR-212-3p  | HJURP     | 55355  | ENSG00000123485 | validated |
| tarbase | hsa-miR-181a-5p | AMD1      | 262    | ENSG00000123505 | validated |
| tarbase | hsa-miR-106b-5p | MORF4L2   | 9643   | ENSG00000123562 | validated |
| tarbase | hsa-miR-181a-5p | MORF4L2   | 9643   | ENSG00000123562 | validated |
| tarbase | hsa-miR-15b-5p  | FAM199X   | 139231 | ENSG00000123575 | validated |
| tarbase | hsa-miR-222-3p  | FAM199X   | 139231 | ENSG00000123575 | validated |
| tarbase | hsa-miR-181a-5p | FAM199X   | 139231 | ENSG00000123575 | validated |
| tarbase | hsa-miR-106b-5p | RAB9A     | 9367   | ENSG00000123595 | validated |
| tarbase | hsa-miR-181a-5p | RAB9A     | 9367   | ENSG00000123595 | validated |

|         |                 |          |        |                 |           |
|---------|-----------------|----------|--------|-----------------|-----------|
| tarbase | hsa-miR-18a-5p  | RAB9A    | 9367   | ENSG00000123595 | validated |
| tarbase | hsa-miR-582-5p  | NMI      | 9111   | ENSG00000123609 | validated |
| tarbase | hsa-miR-212-3p  | NMI      | 9111   | ENSG00000123609 | validated |
| tarbase | hsa-miR-106b-5p | NMI      | 9111   | ENSG00000123609 | validated |
| tarbase | hsa-miR-181a-5p | ACVR1C   | 130399 | ENSG00000123612 | validated |
| tarbase | hsa-miR-212-3p  | BAZ2B    | 29994  | ENSG00000123636 | validated |
| tarbase | hsa-miR-21-5p   | BAZ2B    | 29994  | ENSG00000123636 | validated |
| tarbase | hsa-miR-106b-5p | SLC36A1  | 206358 | ENSG00000123643 | validated |
| tarbase | hsa-miR-21-5p   | SLC36A1  | 206358 | ENSG00000123643 | validated |
| tarbase | hsa-miR-144-3p  | LPGAT1   | 9926   | ENSG00000123684 | validated |
| tarbase | hsa-miR-212-3p  | LPGAT1   | 9926   | ENSG00000123684 | validated |
| tarbase | hsa-miR-301a-3p | LPGAT1   | 9926   | ENSG00000123684 | validated |
| tarbase | hsa-miR-301a-3p | G0S2     | 50486  | ENSG00000123689 | validated |
| tarbase | hsa-miR-18a-5p  | KCNJ2    | 3759   | ENSG00000123700 | validated |
| tarbase | hsa-miR-296-5p  | RAP2C    | 57826  | ENSG00000123728 | validated |
| tarbase | hsa-miR-301a-3p | RAP2C    | 57826  | ENSG00000123728 | validated |
| tarbase | hsa-miR-15b-5p  | PLA2G12A | 81579  | ENSG00000123739 | validated |
| tarbase | hsa-miR-106b-5p | AGO2     | 27161  | ENSG00000123908 | validated |
| tarbase | hsa-miR-18a-5p  | AGO2     | 27161  | ENSG00000123908 | validated |
| tarbase | hsa-miR-192-5p  | MXD4     | 10608  | ENSG00000123933 | validated |
| tarbase | hsa-miR-181a-5p | CKS2     | 1164   | ENSG00000123975 | validated |
| tarbase | hsa-miR-15b-5p  | ACSL3    | 2181   | ENSG00000123983 | validated |
| tarbase | hsa-miR-106b-5p | CHPF     | 79586  | ENSG00000123989 | validated |
| tarbase | hsa-miR-15b-5p  | OBSL1    | 23363  | ENSG00000124006 | validated |
| tarbase | hsa-miR-18a-5p  | FAM210B  | 116151 | ENSG00000124098 | validated |
| tarbase | hsa-miR-106b-5p | PI3      | 5266   | ENSG00000124102 | validated |
| tarbase | hsa-miR-15b-5p  | TTPAL    | 79183  | ENSG00000124120 | validated |
| tarbase | hsa-miR-582-5p  | TTPAL    | 79183  | ENSG00000124120 | validated |
| tarbase | hsa-miR-106b-5p | PREX1    | 57580  | ENSG00000124126 | validated |
| tarbase | hsa-miR-15b-5p  | SLC12A5  | 57468  | ENSG00000124140 | validated |
| tarbase | hsa-miR-15b-5p  | SDC4     | 6385   | ENSG00000124145 | validated |
| tarbase | hsa-miR-212-3p  | SDC4     | 6385   | ENSG00000124145 | validated |
| tarbase | hsa-miR-301a-3p | SDC4     | 6385   | ENSG00000124145 | validated |
| tarbase | hsa-miR-212-3p  | NCOA3    | 8202   | ENSG00000124151 | validated |
| tarbase | hsa-miR-296-5p  | NCOA5    | 57727  | ENSG00000124160 | validated |
| tarbase | hsa-miR-582-3p  | NCOA5    | 57727  | ENSG00000124160 | validated |
| tarbase | hsa-miR-106b-5p | VAPB     | 9217   | ENSG00000124164 | validated |
| tarbase | hsa-miR-15b-5p  | VAPB     | 9217   | ENSG00000124164 | validated |
| tarbase | hsa-miR-212-3p  | VAPB     | 9217   | ENSG00000124164 | validated |
| tarbase | hsa-miR-222-3p  | VAPB     | 9217   | ENSG00000124164 | validated |
| tarbase | hsa-miR-15b-5p  | PARD6B   | 84612  | ENSG00000124171 | validated |
| tarbase | hsa-miR-181a-5p | PARD6B   | 84612  | ENSG00000124171 | validated |
| tarbase | hsa-miR-505-3p  | PARD6B   | 84612  | ENSG00000124171 | validated |
| tarbase | hsa-miR-582-3p  | PARD6B   | 84612  | ENSG00000124171 | validated |
| tarbase | hsa-miR-582-5p  | PARD6B   | 84612  | ENSG00000124171 | validated |
| tarbase | hsa-miR-15b-5p  | CHD6     | 84181  | ENSG00000124177 | validated |
| tarbase | hsa-miR-212-3p  | CHD6     | 84181  | ENSG00000124177 | validated |
| tarbase | hsa-miR-301a-3p | PLCG1    | 5335   | ENSG00000124181 | validated |
| tarbase | hsa-miR-106b-5p | SRSF6    | 6431   | ENSG00000124193 | validated |
| tarbase | hsa-miR-181a-5p | SRSF6    | 6431   | ENSG00000124193 | validated |
| tarbase | hsa-miR-582-3p  | SRSF6    | 6431   | ENSG00000124193 | validated |
| tarbase | hsa-miR-106b-5p | ARFGEF2  | 10564  | ENSG00000124198 | validated |
| tarbase | hsa-miR-15b-5p  | ARFGEF2  | 10564  | ENSG00000124198 | validated |
| tarbase | hsa-miR-181a-5p | ARFGEF2  | 10564  | ENSG00000124198 | validated |
| tarbase | hsa-miR-15b-5p  | ZNFX1    | 57169  | ENSG00000124201 | validated |
| tarbase | hsa-miR-18a-5p  | ZNFX1    | 57169  | ENSG00000124201 | validated |
| tarbase | hsa-miR-21-5p   | ZNFX1    | 57169  | ENSG00000124201 | validated |
| tarbase | hsa-miR-296-5p  | ZNFX1    | 57169  | ENSG00000124201 | validated |
| tarbase | hsa-miR-301a-3p | ZNFX1    | 57169  | ENSG00000124201 | validated |
| tarbase | hsa-miR-582-5p  | ZNFX1    | 57169  | ENSG00000124201 | validated |
| tarbase | hsa-miR-212-3p  | ZNFX1    | 57169  | ENSG00000124201 | validated |
| tarbase | hsa-miR-181a-5p | CSE1L    | 1434   | ENSG00000124207 | validated |
| tarbase | hsa-miR-21-5p   | CSE1L    | 1434   | ENSG00000124207 | validated |
| tarbase | hsa-miR-326     | CSE1L    | 1434   | ENSG00000124207 | validated |
| tarbase | hsa-miR-15b-5p  | RAB22A   | 57403  | ENSG00000124209 | validated |
| tarbase | hsa-miR-301a-3p | RAB22A   | 57403  | ENSG00000124209 | validated |
| tarbase | hsa-miR-106b-5p | STAU1    | 6780   | ENSG00000124214 | validated |
| tarbase | hsa-miR-15b-5p  | STAU1    | 6780   | ENSG00000124214 | validated |
| tarbase | hsa-miR-212-3p  | STAU1    | 6780   | ENSG00000124214 | validated |
| tarbase | hsa-miR-296-5p  | SNAI1    | 6615   | ENSG00000124216 | validated |
| tarbase | hsa-miR-326     | SNAI1    | 6615   | ENSG00000124216 | validated |



|         |                 |           |        |                 |           |
|---------|-----------------|-----------|--------|-----------------|-----------|
| tarbase | hsa-miR-15b-5p  | STX16     | 8675   | ENSG00000124222 | validated |
| tarbase | hsa-miR-296-5p  | STX16     | 8675   | ENSG00000124222 | validated |
| tarbase | hsa-miR-106b-5p | PMEPA1    | 56937  | ENSG00000124225 | validated |
| tarbase | hsa-miR-212-3p  | PMEPA1    | 56937  | ENSG00000124225 | validated |
| tarbase | hsa-miR-301a-3p | PMEPA1    | 56937  | ENSG00000124225 | validated |
| tarbase | hsa-miR-301a-3p | RNF114    | 55905  | ENSG00000124226 | validated |
| tarbase | hsa-miR-212-3p  | C20orf85  | 128602 | ENSG00000124237 | validated |
| tarbase | hsa-miR-212-3p  | PCK1      | 5105   | ENSG00000124253 | validated |
| tarbase | hsa-miR-181a-5p | MTRR      | 4552   | ENSG00000124275 | validated |
| tarbase | hsa-miR-15b-5p  | PEPD      | 5184   | ENSG00000124299 | validated |
| tarbase | hsa-miR-106b-5p | IQSEC2    | 23096  | ENSG00000124313 | validated |
| tarbase | hsa-miR-15b-5p  | VAMP7     | 6845   | ENSG00000124333 | validated |
| tarbase | hsa-miR-222-3p  | STAMPB    | 10617  | ENSG00000124356 | validated |
| tarbase | hsa-miR-106b-5p | MPHOSPH10 | 10199  | ENSG00000124383 | validated |
| tarbase | hsa-miR-296-5p  | USP22     | 23326  | ENSG00000124422 | validated |
| tarbase | hsa-miR-106b-5p | USP22     | 23326  | ENSG00000124422 | validated |
| tarbase | hsa-miR-181a-5p | USP22     | 23326  | ENSG00000124422 | validated |
| tarbase | hsa-miR-582-5p  | ZNF576    | 79177  | ENSG00000124444 | validated |
| tarbase | hsa-miR-18a-5p  | LYPD3     | 27076  | ENSG00000124466 | validated |
| tarbase | hsa-miR-106b-5p | USP9X     | 8239   | ENSG00000124486 | validated |
| tarbase | hsa-miR-181a-5p | USP9X     | 8239   | ENSG00000124486 | validated |
| tarbase | hsa-miR-18a-5p  | USP9X     | 8239   | ENSG00000124486 | validated |
| tarbase | hsa-miR-212-3p  | USP9X     | 8239   | ENSG00000124486 | validated |
| tarbase | hsa-miR-21-5p   | USP9X     | 8239   | ENSG00000124486 | validated |
| tarbase | hsa-miR-106b-5p | F13A1     | 2162   | ENSG00000124491 | validated |
| tarbase | hsa-miR-106b-5p | SIRT5     | 23408  | ENSG00000124523 | validated |
| tarbase | hsa-miR-192-5p  | WRNIP1    | 56897  | ENSG00000124535 | validated |
| tarbase | hsa-miR-181a-5p | RRP36     | 88745  | ENSG00000124541 | validated |
| tarbase | hsa-miR-106b-5p | SNRPC     | 6631   | ENSG00000124562 | validated |
| tarbase | hsa-miR-15b-5p  | ABCC10    | 89845  | ENSG00000124574 | validated |
| tarbase | hsa-miR-301a-3p | AARS2     | 57505  | ENSG00000124608 | validated |
| tarbase | hsa-miR-106b-5p | TBCC      | 6903   | ENSG00000124659 | validated |
| tarbase | hsa-miR-106b-5p | KLHDC3    | 116138 | ENSG00000124702 | validated |
| tarbase | hsa-miR-15b-5p  | KLHDC3    | 116138 | ENSG00000124702 | validated |
| tarbase | hsa-miR-326     | KLHDC3    | 116138 | ENSG00000124702 | validated |
| tarbase | hsa-miR-582-3p  | TREM1     | 54210  | ENSG00000124731 | validated |
| tarbase | hsa-miR-106b-5p | MEA1      | 4201   | ENSG00000124733 | validated |
| tarbase | hsa-miR-296-5p  | MEA1      | 4201   | ENSG00000124733 | validated |
| tarbase | hsa-miR-18a-5p  | KLHL31    | 401265 | ENSG00000124743 | validated |
| tarbase | hsa-miR-212-3p  | COL21A1   | 81578  | ENSG00000124749 | validated |
| tarbase | hsa-miR-18a-5p  | CDKN1A    | 1026   | ENSG00000124762 | validated |
| tarbase | hsa-miR-301a-3p | CDKN1A    | 1026   | ENSG00000124762 | validated |
| tarbase | hsa-miR-181a-5p | SOX4      | 6659   | ENSG00000124766 | validated |
| tarbase | hsa-miR-192-5p  | SOX4      | 6659   | ENSG00000124766 | validated |
| tarbase | hsa-miR-18a-5p  | GLO1      | 2739   | ENSG00000124767 | validated |
| tarbase | hsa-miR-301a-3p | GLO1      | 2739   | ENSG00000124767 | validated |
| tarbase | hsa-miR-326     | GLO1      | 2739   | ENSG00000124767 | validated |
| tarbase | hsa-miR-15b-5p  | RREB1     | 6239   | ENSG00000124782 | validated |
| tarbase | hsa-miR-222-3p  | RREB1     | 6239   | ENSG00000124782 | validated |
| tarbase | hsa-miR-106b-5p | SSR1      | 6745   | ENSG00000124783 | validated |
| tarbase | hsa-miR-301a-3p | SSR1      | 6745   | ENSG00000124783 | validated |
| tarbase | hsa-miR-505-3p  | SSR1      | 6745   | ENSG00000124783 | validated |
| tarbase | hsa-miR-582-3p  | SSR1      | 6745   | ENSG00000124783 | validated |
| tarbase | hsa-miR-582-5p  | SSR1      | 6745   | ENSG00000124783 | validated |
| tarbase | hsa-miR-181a-5p | ATXN1     | 6310   | ENSG00000124788 | validated |
| tarbase | hsa-miR-222-3p  | ATXN1     | 6310   | ENSG00000124788 | validated |
| tarbase | hsa-miR-296-5p  | ATXN1     | 6310   | ENSG00000124788 | validated |
| tarbase | hsa-miR-301a-3p | ATXN1     | 6310   | ENSG00000124788 | validated |
| tarbase | hsa-miR-15b-5p  | NUP153    | 9972   | ENSG00000124789 | validated |
| tarbase | hsa-miR-181a-5p | NUP153    | 9972   | ENSG00000124789 | validated |
| tarbase | hsa-miR-301a-3p | NUP153    | 9972   | ENSG00000124789 | validated |
| tarbase | hsa-miR-181a-5p | DEK       | 7913   | ENSG00000124795 | validated |
| tarbase | hsa-miR-21-5p   | DEK       | 7913   | ENSG00000124795 | validated |
| tarbase | hsa-miR-222-3p  | DEK       | 7913   | ENSG00000124795 | validated |
| tarbase | hsa-miR-505-3p  | EEF1E1    | 9521   | ENSG00000124802 | validated |
| tarbase | hsa-miR-181a-5p | EEF1E1    | 9521   | ENSG00000124802 | validated |
| tarbase | hsa-miR-505-3p  | RUNX2     | 860    | ENSG00000124813 | validated |
| tarbase | hsa-miR-212-3p  | GCM2      | 9247   | ENSG00000124827 | validated |
| tarbase | hsa-miR-212-3p  | LRRFIP1   | 9208   | ENSG00000124831 | validated |
| tarbase | hsa-miR-181a-5p | LRRFIP1   | 9208   | ENSG00000124831 | validated |
| tarbase | hsa-miR-301a-3p | CXCL6     | 6372   | ENSG00000124875 | validated |

|         |                 |          |       |                 |           |
|---------|-----------------|----------|-------|-----------------|-----------|
| tarbase | hsa-miR-106b-5p | AHNAK    | 79026 | ENSG00000124942 | validated |
| tarbase | hsa-miR-181a-5p | AHNAK    | 79026 | ENSG00000124942 | validated |
| tarbase | hsa-miR-18a-5p  | AHNAK    | 79026 | ENSG00000124942 | validated |
| tarbase | hsa-miR-21-5p   | AHNAK    | 79026 | ENSG00000124942 | validated |
| tarbase | hsa-miR-296-5p  | AHNAK    | 79026 | ENSG00000124942 | validated |
| tarbase | hsa-miR-505-3p  | AHNAK    | 79026 | ENSG00000124942 | validated |
| tarbase | hsa-miR-301a-3p | EMC3     | 55831 | ENSG00000125037 | validated |
| tarbase | hsa-miR-106b-5p | CNOT1    | 23019 | ENSG00000125107 | validated |
| tarbase | hsa-miR-144-3p  | CNOT1    | 23019 | ENSG00000125107 | validated |
| tarbase | hsa-miR-15b-5p  | CNOT1    | 23019 | ENSG00000125107 | validated |
| tarbase | hsa-miR-181a-5p | CNOT1    | 23019 | ENSG00000125107 | validated |
| tarbase | hsa-miR-18a-5p  | CNOT1    | 23019 | ENSG00000125107 | validated |
| tarbase | hsa-miR-301a-3p | CNOT1    | 23019 | ENSG00000125107 | validated |
| tarbase | hsa-miR-582-3p  | CNOT1    | 23019 | ENSG00000125107 | validated |
| tarbase | hsa-miR-296-5p  | GOT2     | 2806  | ENSG00000125166 | validated |
| tarbase | hsa-miR-181a-5p | GOT2     | 2806  | ENSG00000125166 | validated |
| tarbase | hsa-miR-15b-5p  | TMTC4    | 84899 | ENSG00000125247 | validated |
| tarbase | hsa-miR-15b-5p  | RAP2A    | 5911  | ENSG00000125249 | validated |
| tarbase | hsa-miR-181a-5p | RAP2A    | 5911  | ENSG00000125249 | validated |
| tarbase | hsa-miR-106b-5p | EFNB2    | 1948  | ENSG00000125266 | validated |
| tarbase | hsa-miR-301a-3p | EFNB2    | 1948  | ENSG00000125266 | validated |
| tarbase | hsa-miR-212-3p  | SOX21    | 11166 | ENSG00000125285 | validated |
| tarbase | hsa-miR-18a-5p  | TM9SF2   | 9375  | ENSG00000125304 | validated |
| tarbase | hsa-miR-106b-5p | IRF1     | 3659  | ENSG00000125347 | validated |
| tarbase | hsa-miR-15b-5p  | IRF1     | 3659  | ENSG00000125347 | validated |
| tarbase | hsa-miR-212-3p  | IRF1     | 3659  | ENSG00000125347 | validated |
| tarbase | hsa-miR-582-5p  | TMEM255A | 55026 | ENSG00000125355 | validated |
| tarbase | hsa-miR-212-3p  | TMEM255A | 55026 | ENSG00000125355 | validated |
| tarbase | hsa-miR-18a-5p  | BMP4     | 652   | ENSG00000125378 | validated |
| tarbase | hsa-miR-21-5p   | SOX9     | 6662  | ENSG00000125398 | validated |
| tarbase | hsa-miR-18a-5p  | HS3ST3B1 | 9953  | ENSG00000125430 | validated |
| tarbase | hsa-miR-326     | MRPS7    | 51081 | ENSG00000125445 | validated |
| tarbase | hsa-miR-21-5p   | SLC25A19 | 60386 | ENSG00000125454 | validated |
| tarbase | hsa-miR-326     | SLC25A19 | 60386 | ENSG00000125454 | validated |
| tarbase | hsa-miR-106b-5p | GTF3C4   | 9329  | ENSG00000125484 | validated |
| tarbase | hsa-miR-15b-5p  | GTF3C4   | 9329  | ENSG00000125484 | validated |
| tarbase | hsa-miR-192-5p  | GTF3C4   | 9329  | ENSG00000125484 | validated |
| tarbase | hsa-miR-21-5p   | GTF3C4   | 9329  | ENSG00000125484 | validated |
| tarbase | hsa-miR-582-5p  | GTF3C4   | 9329  | ENSG00000125484 | validated |
| tarbase | hsa-miR-192-5p  | BARHL1   | 56751 | ENSG00000125492 | validated |
| tarbase | hsa-miR-15b-5p  | MBOAT7   | 79143 | ENSG00000125505 | validated |
| tarbase | hsa-miR-21-5p   | SLC2A4RG | 56731 | ENSG00000125520 | validated |
| tarbase | hsa-miR-301a-3p | SLC2A4RG | 56731 | ENSG00000125520 | validated |
| tarbase | hsa-miR-326     | PPDPF    | 79144 | ENSG00000125534 | validated |
| tarbase | hsa-miR-212-3p  | PLGLB2   | 5342  | ENSG00000125551 | validated |
| tarbase | hsa-miR-212-3p  | INSIG2   | 51141 | ENSG00000125629 | validated |
| tarbase | hsa-miR-15b-5p  | INSIG2   | 51141 | ENSG00000125629 | validated |
| tarbase | hsa-miR-21-5p   | CCDC93   | 54520 | ENSG00000125633 | validated |
| tarbase | hsa-miR-181a-5p | THOC2    | 57187 | ENSG00000125676 | validated |
| tarbase | hsa-miR-106b-5p | MED1     | 5469  | ENSG00000125686 | validated |
| tarbase | hsa-miR-15b-5p  | MED1     | 5469  | ENSG00000125686 | validated |
| tarbase | hsa-miR-505-3p  | MED1     | 5469  | ENSG00000125686 | validated |
| tarbase | hsa-miR-18a-5p  | MED1     | 5469  | ENSG00000125686 | validated |
| tarbase | hsa-miR-106b-5p | OPA3     | 80207 | ENSG00000125741 | validated |
| tarbase | hsa-miR-18a-5p  | EML2     | 24139 | ENSG00000125746 | validated |
| tarbase | hsa-miR-106b-5p | VASP     | 7408  | ENSG00000125753 | validated |
| tarbase | hsa-miR-18a-5p  | VASP     | 7408  | ENSG00000125753 | validated |
| tarbase | hsa-miR-15b-5p  | SYMPK    | 8189  | ENSG00000125755 | validated |
| tarbase | hsa-miR-144-3p  | GPCPD1   | 56261 | ENSG00000125772 | validated |
| tarbase | hsa-miR-181a-5p | GPCPD1   | 56261 | ENSG00000125772 | validated |
| tarbase | hsa-miR-212-3p  | GPCPD1   | 56261 | ENSG00000125772 | validated |
| tarbase | hsa-miR-326     | GPCPD1   | 56261 | ENSG00000125772 | validated |
| tarbase | hsa-miR-106b-5p | PANK2    | 80025 | ENSG00000125779 | validated |
| tarbase | hsa-miR-505-3p  | PANK2    | 80025 | ENSG00000125779 | validated |
| tarbase | hsa-miR-181a-5p | CD93     | 22918 | ENSG00000125810 | validated |
| tarbase | hsa-miR-106b-5p | NAPB     | 63908 | ENSG00000125814 | validated |
| tarbase | hsa-miR-181a-5p | NAPB     | 63908 | ENSG00000125814 | validated |
| tarbase | hsa-miR-296-5p  | CENPB    | 1059  | ENSG00000125817 | validated |
| tarbase | hsa-miR-326     | CENPB    | 1059  | ENSG00000125817 | validated |
| tarbase | hsa-miR-212-3p  | CENPB    | 1059  | ENSG00000125817 | validated |
| tarbase | hsa-miR-192-5p  | TMX4     | 56255 | ENSG00000125827 | validated |

|         |                 |         |        |                 |           |
|---------|-----------------|---------|--------|-----------------|-----------|
| tarbase | hsa-miR-106b-5p | STK35   | 140901 | ENSG00000125834 | validated |
| tarbase | hsa-miR-15b-5p  | STK35   | 140901 | ENSG00000125834 | validated |
| tarbase | hsa-miR-212-3p  | STK35   | 140901 | ENSG00000125834 | validated |
| tarbase | hsa-miR-15b-5p  | SNRPB   | 6628   | ENSG00000125835 | validated |
| tarbase | hsa-miR-18a-5p  | SNRPB   | 6628   | ENSG00000125835 | validated |
| tarbase | hsa-miR-222-3p  | SNRPB   | 6628   | ENSG00000125835 | validated |
| tarbase | hsa-miR-192-5p  | BMP2    | 650    | ENSG00000125845 | validated |
| tarbase | hsa-miR-106b-5p | MKKS    | 8195   | ENSG00000125863 | validated |
| tarbase | hsa-miR-212-3p  | LRRN4   | 164312 | ENSG00000125872 | validated |
| tarbase | hsa-miR-106b-5p | TBC1D20 | 128637 | ENSG00000125875 | validated |
| tarbase | hsa-miR-18a-5p  | TBC1D20 | 128637 | ENSG00000125875 | validated |
| tarbase | hsa-miR-296-5p  | TBC1D20 | 128637 | ENSG00000125875 | validated |
| tarbase | hsa-miR-582-5p  | TBC1D20 | 128637 | ENSG00000125875 | validated |
| tarbase | hsa-miR-21-5p   | ITPA    | 3704   | ENSG00000125877 | validated |
| tarbase | hsa-miR-301a-3p | ITPA    | 3704   | ENSG00000125877 | validated |
| tarbase | hsa-miR-212-3p  | FAM110A | 83541  | ENSG00000125898 | validated |
| tarbase | hsa-miR-15b-5p  | NCLN    | 56926  | ENSG00000125912 | validated |
| tarbase | hsa-miR-326     | NCLN    | 56926  | ENSG00000125912 | validated |
| tarbase | hsa-miR-181a-5p | HNRNPR  | 10236  | ENSG00000125944 | validated |
| tarbase | hsa-miR-212-3p  | HNRNPR  | 10236  | ENSG00000125944 | validated |
| tarbase | hsa-miR-15b-5p  | MAX     | 4149   | ENSG00000125952 | validated |
| tarbase | hsa-miR-15b-5p  | ID1     | 3397   | ENSG00000125968 | validated |
| tarbase | hsa-miR-181a-5p | DYNLRB1 | 83658  | ENSG00000125971 | validated |
| tarbase | hsa-miR-15b-5p  | ROMO1   | 140823 | ENSG00000125995 | validated |
| tarbase | hsa-miR-222-3p  | BPIFB1  | 92747  | ENSG00000125999 | validated |
| tarbase | hsa-miR-15b-5p  | PLAGL2  | 5326   | ENSG00000126003 | validated |
| tarbase | hsa-miR-21-5p   | PLAGL2  | 5326   | ENSG00000126003 | validated |
| tarbase | hsa-miR-181a-5p | PLAGL2  | 5326   | ENSG00000126003 | validated |
| tarbase | hsa-miR-181a-5p | AMOT    | 154796 | ENSG00000126016 | validated |
| tarbase | hsa-miR-15b-5p  | TMEM115 | 11070  | ENSG00000126062 | validated |
| tarbase | hsa-miR-106b-5p | PSMB2   | 5690   | ENSG00000126067 | validated |
| tarbase | hsa-miR-144-3p  | PSMB2   | 5690   | ENSG00000126067 | validated |
| tarbase | hsa-miR-144-3p  | AGO3    | 192669 | ENSG00000126070 | validated |
| tarbase | hsa-miR-15b-5p  | AGO3    | 192669 | ENSG00000126070 | validated |
| tarbase | hsa-miR-181a-5p | AGO3    | 192669 | ENSG00000126070 | validated |
| tarbase | hsa-miR-18a-5p  | AGO3    | 192669 | ENSG00000126070 | validated |
| tarbase | hsa-miR-222-3p  | AGO3    | 192669 | ENSG00000126070 | validated |
| tarbase | hsa-miR-296-5p  | HECTD3  | 79654  | ENSG00000126107 | validated |
| tarbase | hsa-miR-582-5p  | HECTD3  | 79654  | ENSG00000126107 | validated |
| tarbase | hsa-miR-106b-5p | KLC1    | 3831   | ENSG00000126214 | validated |
| tarbase | hsa-miR-15b-5p  | KLC1    | 3831   | ENSG00000126214 | validated |
| tarbase | hsa-miR-18a-5p  | KLC1    | 3831   | ENSG00000126214 | validated |
| tarbase | hsa-miR-505-3p  | KLC1    | 3831   | ENSG00000126214 | validated |
| tarbase | hsa-miR-212-3p  | TUBGCP3 | 10426  | ENSG00000126216 | validated |
| tarbase | hsa-miR-106b-5p | TUBGCP3 | 10426  | ENSG00000126216 | validated |
| tarbase | hsa-miR-106b-5p | MCF2L   | 23263  | ENSG00000126217 | validated |
| tarbase | hsa-miR-582-3p  | MCF2L   | 23263  | ENSG00000126217 | validated |
| tarbase | hsa-miR-181a-5p | PCID2   | 55795  | ENSG00000126226 | validated |
| tarbase | hsa-miR-192-5p  | CAPNS1  | 826    | ENSG00000126247 | validated |
| tarbase | hsa-miR-296-5p  | CAPNS1  | 826    | ENSG00000126247 | validated |
| tarbase | hsa-miR-326     | CCR7    | 1236   | ENSG00000126353 | validated |
| tarbase | hsa-miR-15b-5p  | PRDX5   | 25824  | ENSG00000126432 | validated |
| tarbase | hsa-miR-296-5p  | PRDX5   | 25824  | ENSG00000126432 | validated |
| tarbase | hsa-miR-296-5p  | IRF3    | 3661   | ENSG00000126456 | validated |
| tarbase | hsa-miR-18a-5p  | PRR12   | 57479  | ENSG00000126464 | validated |
| tarbase | hsa-miR-212-3p  | PRR12   | 57479  | ENSG00000126464 | validated |
| tarbase | hsa-miR-296-5p  | PRR12   | 57479  | ENSG00000126464 | validated |
| tarbase | hsa-miR-15b-5p  | BECN1   | 8678   | ENSG00000126581 | validated |
| tarbase | hsa-miR-301a-3p | BECN1   | 8678   | ENSG00000126581 | validated |
| tarbase | hsa-miR-15b-5p  | TRAP1   | 10131  | ENSG00000126602 | validated |
| tarbase | hsa-miR-15b-5p  | NSRP1   | 84081  | ENSG00000126653 | validated |
| tarbase | hsa-miR-301a-3p | AHDC1   | 27245  | ENSG00000126705 | validated |
| tarbase | hsa-miR-212-3p  | IFI6    | 2537   | ENSG00000126709 | validated |
| tarbase | hsa-miR-192-5p  | ZNF384  | 171017 | ENSG00000126746 | validated |
| tarbase | hsa-miR-181a-5p | ZNF384  | 171017 | ENSG00000126746 | validated |
| tarbase | hsa-miR-296-5p  | ELK1    | 2002   | ENSG00000126767 | validated |
| tarbase | hsa-miR-106b-5p | PCNX4   | 64430  | ENSG00000126773 | validated |
| tarbase | hsa-miR-181a-5p | PCNX4   | 64430  | ENSG00000126773 | validated |
| tarbase | hsa-miR-212-3p  | ATG14   | 22863  | ENSG00000126775 | validated |
| tarbase | hsa-miR-15b-5p  | KTN1    | 3895   | ENSG00000126777 | validated |
| tarbase | hsa-miR-181a-5p | KTN1    | 3895   | ENSG00000126777 | validated |

|         |                 |         |        |                 |           |
|---------|-----------------|---------|--------|-----------------|-----------|
| tarbase | hsa-miR-222-3p  | SIX1    | 6495   | ENSG00000126778 | validated |
| tarbase | hsa-miR-212-3p  | DLGAP5  | 9787   | ENSG00000126787 | validated |
| tarbase | hsa-miR-144-3p  | ZBTB1   | 22890  | ENSG00000126804 | validated |
| tarbase | hsa-miR-181a-5p | ZBTB1   | 22890  | ENSG00000126804 | validated |
| tarbase | hsa-miR-21-5p   | ZBTB1   | 22890  | ENSG00000126804 | validated |
| tarbase | hsa-miR-212-3p  | ZBTB1   | 22890  | ENSG00000126804 | validated |
| tarbase | hsa-miR-106b-5p | SGPP1   | 81537  | ENSG00000126821 | validated |
| tarbase | hsa-miR-181a-5p | EVI2A   | 2123   | ENSG00000126860 | validated |
| tarbase | hsa-miR-18a-5p  | NUP214  | 8021   | ENSG00000126883 | validated |
| tarbase | hsa-miR-21-5p   | NUP214  | 8021   | ENSG00000126883 | validated |
| tarbase | hsa-miR-326     | NUP214  | 8021   | ENSG00000126883 | validated |
| tarbase | hsa-miR-296-5p  | MAP2K2  | 5605   | ENSG00000126934 | validated |
| tarbase | hsa-miR-106b-5p | HNRNPH2 | 3188   | ENSG00000126945 | validated |
| tarbase | hsa-miR-15b-5p  | ARMCX1  | 51309  | ENSG00000126947 | validated |
| tarbase | hsa-miR-192-5p  | CANX    | 821    | ENSG00000127022 | validated |
| tarbase | hsa-miR-301a-3p | CANX    | 821    | ENSG00000127022 | validated |
| tarbase | hsa-miR-106b-5p | ZNF484  | 83744  | ENSG00000127081 | validated |
| tarbase | hsa-miR-181a-5p | ZNF484  | 83744  | ENSG00000127081 | validated |
| tarbase | hsa-miR-106b-5p | HIVEP3  | 59269  | ENSG00000127124 | validated |
| tarbase | hsa-miR-106b-5p | BCL11B  | 64919  | ENSG00000127152 | validated |
| tarbase | hsa-miR-106b-5p | HELB    | 92797  | ENSG00000127311 | validated |
| tarbase | hsa-miR-301a-3p | HELB    | 92797  | ENSG00000127311 | validated |
| tarbase | hsa-miR-106b-5p | RAP1B   | 5908   | ENSG00000127314 | validated |
| tarbase | hsa-miR-326     | RAB3IP  | 117177 | ENSG00000127328 | validated |
| tarbase | hsa-miR-582-3p  | RAB3IP  | 117177 | ENSG00000127328 | validated |
| tarbase | hsa-miR-181a-5p | RAB3IP  | 117177 | ENSG00000127328 | validated |
| tarbase | hsa-miR-15b-5p  | DYRK2   | 8445   | ENSG00000127334 | validated |
| tarbase | hsa-miR-181a-5p | DYRK2   | 8445   | ENSG00000127334 | validated |
| tarbase | hsa-miR-18a-5p  | DYRK2   | 8445   | ENSG00000127334 | validated |
| tarbase | hsa-miR-582-3p  | DYRK2   | 8445   | ENSG00000127334 | validated |
| tarbase | hsa-miR-21-5p   | YEATS4  | 8089   | ENSG00000127337 | validated |
| tarbase | hsa-miR-296-5p  | YEATS4  | 8089   | ENSG00000127337 | validated |
| tarbase | hsa-miR-296-5p  | FGFRL1  | 53834  | ENSG00000127418 | validated |
| tarbase | hsa-miR-212-3p  | EMC1    | 23065  | ENSG00000127463 | validated |
| tarbase | hsa-miR-582-3p  | EMC1    | 23065  | ENSG00000127463 | validated |
| tarbase | hsa-miR-106b-5p | UBR4    | 23352  | ENSG00000127481 | validated |
| tarbase | hsa-miR-15b-5p  | UBR4    | 23352  | ENSG00000127481 | validated |
| tarbase | hsa-miR-181a-5p | UBR4    | 23352  | ENSG00000127481 | validated |
| tarbase | hsa-miR-222-3p  | UBR4    | 23352  | ENSG00000127481 | validated |
| tarbase | hsa-miR-296-5p  | UBR4    | 23352  | ENSG00000127481 | validated |
| tarbase | hsa-miR-301a-3p | UBR4    | 23352  | ENSG00000127481 | validated |
| tarbase | hsa-miR-582-5p  | UBR4    | 23352  | ENSG00000127481 | validated |
| tarbase | hsa-miR-106b-5p | HP1BP3  | 50809  | ENSG00000127483 | validated |
| tarbase | hsa-miR-181a-5p | SIN3B   | 23309  | ENSG00000127511 | validated |
| tarbase | hsa-miR-18a-5p  | SIN3B   | 23309  | ENSG00000127511 | validated |
| tarbase | hsa-miR-181a-5p | SLC35E1 | 79939  | ENSG00000127526 | validated |
| tarbase | hsa-miR-301a-3p | SLC35E1 | 79939  | ENSG00000127526 | validated |
| tarbase | hsa-miR-582-5p  | SLC35E1 | 79939  | ENSG00000127526 | validated |
| tarbase | hsa-miR-212-3p  | KLF2    | 10365  | ENSG00000127528 | validated |
| tarbase | hsa-miR-212-3p  | SYNGR3  | 9143   | ENSG00000127561 | validated |
| tarbase | hsa-miR-222-3p  |         |        | ENSG00000127603 | validated |
| tarbase | hsa-miR-296-5p  |         |        | ENSG00000127603 | validated |
| tarbase | hsa-miR-582-5p  |         |        | ENSG00000127603 | validated |
| tarbase | hsa-miR-15b-5p  | SMARCA4 | 6597   | ENSG00000127616 | validated |
| tarbase | hsa-miR-21-5p   | KDM4B   | 23030  | ENSG00000127663 | validated |
| tarbase | hsa-miR-582-3p  | AAMP    | 14     | ENSG00000127837 | validated |
| tarbase | hsa-miR-301a-3p | RNF6    | 6049   | ENSG00000127870 | validated |
| tarbase | hsa-miR-18a-5p  | ECHS1   | 1892   | ENSG00000127884 | validated |
| tarbase | hsa-miR-15b-5p  | AKAP9   | 10142  | ENSG00000127914 | validated |
| tarbase | hsa-miR-181a-5p | AKAP9   | 10142  | ENSG00000127914 | validated |
| tarbase | hsa-miR-21-5p   | HIP1    | 3092   | ENSG00000127946 | validated |
| tarbase | hsa-miR-106b-5p | PTPN12  | 5782   | ENSG00000127947 | validated |
| tarbase | hsa-miR-15b-5p  | PTPN12  | 5782   | ENSG00000127947 | validated |
| tarbase | hsa-miR-18a-5p  | PTPN12  | 5782   | ENSG00000127947 | validated |
| tarbase | hsa-miR-212-3p  | PTPN12  | 5782   | ENSG00000127947 | validated |
| tarbase | hsa-miR-106b-5p | FGL2    | 10875  | ENSG00000127951 | validated |
| tarbase | hsa-miR-301a-3p | STEAP4  | 79689  | ENSG00000127954 | validated |
| tarbase | hsa-miR-301a-3p | GNAI1   | 2770   | ENSG00000127955 | validated |
| tarbase | hsa-miR-192-5p  | PEX1    | 5189   | ENSG00000127980 | validated |
| tarbase | hsa-miR-505-3p  | PEX1    | 5189   | ENSG00000127980 | validated |
| tarbase | hsa-miR-21-5p   | MTERF1  | 7978   | ENSG00000127989 | validated |

|         |                 |          |        |                 |           |
|---------|-----------------|----------|--------|-----------------|-----------|
| tarbase | hsa-miR-21-5p   | ZNF780B  | 163131 | ENSG00000128000 | validated |
| tarbase | hsa-miR-296-5p  | ZFP36    | 7538   | ENSG00000128016 | validated |
| tarbase | hsa-miR-301a-3p | ZFP36    | 7538   | ENSG00000128016 | validated |
| tarbase | hsa-miR-106b-5p | RASL11B  | 65997  | ENSG00000128045 | validated |
| tarbase | hsa-miR-192-5p  | RASL11B  | 65997  | ENSG00000128045 | validated |
| tarbase | hsa-miR-582-5p  | PAICS    | 10606  | ENSG00000128050 | validated |
| tarbase | hsa-miR-15b-5p  | PAICS    | 10606  | ENSG00000128050 | validated |
| tarbase | hsa-miR-106b-5p | KDR      | 3791   | ENSG00000128052 | validated |
| tarbase | hsa-miR-326     | KDR      | 3791   | ENSG00000128052 | validated |
| tarbase | hsa-miR-18a-5p  | DGCR8    | 54487  | ENSG00000128191 | validated |
| tarbase | hsa-miR-212-3p  | DGCR8    | 54487  | ENSG00000128191 | validated |
| tarbase | hsa-miR-181a-5p | YWHAH    | 7533   | ENSG00000128245 | validated |
| tarbase | hsa-miR-212-3p  | YWHAH    | 7533   | ENSG00000128245 | validated |
| tarbase | hsa-miR-222-3p  | YWHAH    | 7533   | ENSG00000128245 | validated |
| tarbase | hsa-miR-192-5p  | ATF4     | 468    | ENSG00000128272 | validated |
| tarbase | hsa-miR-222-3p  | ATF4     | 468    | ENSG00000128272 | validated |
| tarbase | hsa-miR-212-3p  | BAIAP2L2 | 80115  | ENSG00000128298 | validated |
| tarbase | hsa-miR-181a-5p | LIF      | 3976   | ENSG00000128342 | validated |
| tarbase | hsa-miR-18a-5p  | LIF      | 3976   | ENSG00000128342 | validated |
| tarbase | hsa-miR-212-3p  | C22orf23 | 84645  | ENSG00000128346 | validated |
| tarbase | hsa-miR-15b-5p  | EMC4     | 51234  | ENSG00000128463 | validated |
| tarbase | hsa-miR-106b-5p | SPECC1   | 92521  | ENSG00000128487 | validated |
| tarbase | hsa-miR-181a-5p | DOCK4    | 9732   | ENSG00000128512 | validated |
| tarbase | hsa-miR-21-5p   | FOXP2    | 93986  | ENSG00000128573 | validated |
| tarbase | hsa-miR-212-3p  | FOXP2    | 93986  | ENSG00000128573 | validated |
| tarbase | hsa-miR-106b-5p | IFT22    | 64792  | ENSG00000128581 | validated |
| tarbase | hsa-miR-106b-5p | MKLN1    | 4289   | ENSG00000128585 | validated |
| tarbase | hsa-miR-181a-5p | MKLN1    | 4289   | ENSG00000128585 | validated |
| tarbase | hsa-miR-582-5p  | MKLN1    | 4289   | ENSG00000128585 | validated |
| tarbase | hsa-miR-301a-3p | DNAJB9   | 4189   | ENSG00000128590 | validated |
| tarbase | hsa-miR-106b-5p | CALU     | 813    | ENSG00000128595 | validated |
| tarbase | hsa-miR-212-3p  | CALU     | 813    | ENSG00000128595 | validated |
| tarbase | hsa-miR-582-3p  | CALU     | 813    | ENSG00000128595 | validated |
| tarbase | hsa-miR-106b-5p | KLHDC10  | 23008  | ENSG00000128607 | validated |
| tarbase | hsa-miR-18a-5p  | KLHDC10  | 23008  | ENSG00000128607 | validated |
| tarbase | hsa-miR-326     | KLHDC10  | 23008  | ENSG00000128607 | validated |
| tarbase | hsa-miR-301a-3p | NDUFA5   | 4698   | ENSG00000128609 | validated |
| tarbase | hsa-miR-181a-5p | MTX2     | 10651  | ENSG00000128654 | validated |
| tarbase | hsa-miR-301a-3p | ORMDL1   | 94101  | ENSG00000128699 | validated |
| tarbase | hsa-miR-582-3p  | ORMDL1   | 94101  | ENSG00000128699 | validated |
| tarbase | hsa-miR-21-5p   | HAT1     | 8520   | ENSG00000128708 | validated |
| tarbase | hsa-miR-212-3p  | SNRPN    | 6638   | ENSG00000128739 | validated |
| tarbase | hsa-miR-106b-5p | PSMG2    | 56984  | ENSG00000128789 | validated |
| tarbase | hsa-miR-582-5p  | PSMG2    | 56984  | ENSG00000128789 | validated |
| tarbase | hsa-miR-296-5p  | TWSG1    | 57045  | ENSG00000128791 | validated |
| tarbase | hsa-miR-15b-5p  | MYO5C    | 55930  | ENSG00000128833 | validated |
| tarbase | hsa-miR-15b-5p  | TTBK2    | 146057 | ENSG00000128881 | validated |
| tarbase | hsa-miR-181a-5p | CCDC32   | 90416  | ENSG00000128891 | validated |
| tarbase | hsa-miR-301a-3p | CCDC32   | 90416  | ENSG00000128891 | validated |
| tarbase | hsa-miR-301a-3p | INO80    | 54617  | ENSG00000128908 | validated |
| tarbase | hsa-miR-181a-5p | ICE2     | 79664  | ENSG00000128915 | validated |
| tarbase | hsa-miR-15b-5p  | ICE2     | 79664  | ENSG00000128915 | validated |
| tarbase | hsa-miR-181a-5p | MINDY2   | 54629  | ENSG00000128923 | validated |
| tarbase | hsa-miR-18a-5p  | MINDY2   | 54629  | ENSG00000128923 | validated |
| tarbase | hsa-miR-21-5p   | MINDY2   | 54629  | ENSG00000128923 | validated |
| tarbase | hsa-miR-181a-5p | IVD      | 3712   | ENSG00000128928 | validated |
| tarbase | hsa-miR-301a-3p | DUT      | 1854   | ENSG00000128951 | validated |
| tarbase | hsa-miR-296-5p  | CHAC1    | 79094  | ENSG00000128965 | validated |
| tarbase | hsa-miR-582-3p  | CHAC1    | 79094  | ENSG00000128965 | validated |
| tarbase | hsa-miR-106b-5p | CHAC1    | 79094  | ENSG00000128965 | validated |
| tarbase | hsa-miR-106b-5p | ARPP19   | 10776  | ENSG00000128989 | validated |
| tarbase | hsa-miR-15b-5p  | ARPP19   | 10776  | ENSG00000128989 | validated |
| tarbase | hsa-miR-181a-5p | ARPP19   | 10776  | ENSG00000128989 | validated |
| tarbase | hsa-miR-21-5p   | VPS13C   | 54832  | ENSG00000129003 | validated |
| tarbase | hsa-miR-181a-5p | VPS13C   | 54832  | ENSG00000129003 | validated |
| tarbase | hsa-miR-212-3p  | THAP10   | 56906  | ENSG00000129028 | validated |
| tarbase | hsa-miR-181a-5p | MBD4     | 8930   | ENSG00000129071 | validated |
| tarbase | hsa-miR-15b-5p  | COPB1    | 1315   | ENSG00000129083 | validated |
| tarbase | hsa-miR-181a-5p | COPB1    | 1315   | ENSG00000129083 | validated |
| tarbase | hsa-miR-18a-5p  | COPB1    | 1315   | ENSG00000129083 | validated |
| tarbase | hsa-miR-212-3p  | COPB1    | 1315   | ENSG00000129083 | validated |

|         |                 |          |        |                 |           |
|---------|-----------------|----------|--------|-----------------|-----------|
| tarbase | hsa-miR-212-3p  | PSMA1    | 5682   | ENSG00000129084 | validated |
| tarbase | hsa-miR-505-3p  | PSMA1    | 5682   | ENSG00000129084 | validated |
| tarbase | hsa-miR-582-3p  | SUMF2    | 25870  | ENSG00000129103 | validated |
| tarbase | hsa-miR-106b-5p | PALLD    | 23022  | ENSG00000129116 | validated |
| tarbase | hsa-miR-106b-5p | SPCS3    | 60559  | ENSG00000129128 | validated |
| tarbase | hsa-miR-15b-5p  | SPCS3    | 60559  | ENSG00000129128 | validated |
| tarbase | hsa-miR-21-5p   | SPCS3    | 60559  | ENSG00000129128 | validated |
| tarbase | hsa-miR-582-5p  | SPCS3    | 60559  | ENSG00000129128 | validated |
| tarbase | hsa-miR-181a-5p | SPCS3    | 60559  | ENSG00000129128 | validated |
| tarbase | hsa-miR-106b-5p | KCNC1    | 3746   | ENSG00000129159 | validated |
| tarbase | hsa-miR-212-3p  | CSRP3    | 8048   | ENSG00000129170 | validated |
| tarbase | hsa-miR-212-3p  | E2F8     | 79733  | ENSG00000129173 | validated |
| tarbase | hsa-miR-15b-5p  | KIF1C    | 10749  | ENSG00000129250 | validated |
| tarbase | hsa-miR-18a-5p  | KIF1C    | 10749  | ENSG00000129250 | validated |
| tarbase | hsa-miR-296-5p  | KIF1C    | 10749  | ENSG00000129250 | validated |
| tarbase | hsa-miR-326     | KIF1C    | 10749  | ENSG00000129250 | validated |
| tarbase | hsa-miR-18a-5p  | PHF20L1  | 51105  | ENSG00000129292 | validated |
| tarbase | hsa-miR-106b-5p | CCNT1    | 904    | ENSG00000129315 | validated |
| tarbase | hsa-miR-582-3p  | CCNT1    | 904    | ENSG00000129315 | validated |
| tarbase | hsa-miR-582-5p  | PUS7L    | 83448  | ENSG00000129317 | validated |
| tarbase | hsa-miR-15b-5p  | ILF3     | 3609   | ENSG00000129351 | validated |
| tarbase | hsa-miR-181a-5p | ILF3     | 3609   | ENSG00000129351 | validated |
| tarbase | hsa-miR-301a-3p | ILF3     | 3609   | ENSG00000129351 | validated |
| tarbase | hsa-miR-505-3p  | ILF3     | 3609   | ENSG00000129351 | validated |
| tarbase | hsa-miR-106b-5p | MTUS1    | 57509  | ENSG00000129422 | validated |
| tarbase | hsa-miR-212-3p  | MTUS1    | 57509  | ENSG00000129422 | validated |
| tarbase | hsa-miR-212-3p  | RIPK3    | 11035  | ENSG00000129465 | validated |
| tarbase | hsa-miR-15b-5p  | BCL2L2   | 599    | ENSG00000129473 | validated |
| tarbase | hsa-miR-181a-5p | BCL2L2   | 599    | ENSG00000129473 | validated |
| tarbase | hsa-miR-212-3p  | BCL2L2   | 599    | ENSG00000129473 | validated |
| tarbase | hsa-miR-296-5p  | BCL2L2   | 599    | ENSG00000129473 | validated |
| tarbase | hsa-miR-301a-3p | BCL2L2   | 599    | ENSG00000129473 | validated |
| tarbase | hsa-miR-326     | BCL2L2   | 599    | ENSG00000129473 | validated |
| tarbase | hsa-miR-106b-5p | AJUBA    | 84962  | ENSG00000129474 | validated |
| tarbase | hsa-miR-181a-5p | AJUBA    | 84962  | ENSG00000129474 | validated |
| tarbase | hsa-miR-18a-5p  | AJUBA    | 84962  | ENSG00000129474 | validated |
| tarbase | hsa-miR-15b-5p  | DTD2     | 112487 | ENSG00000129480 | validated |
| tarbase | hsa-miR-181a-5p | DTD2     | 112487 | ENSG00000129480 | validated |
| tarbase | hsa-miR-15b-5p  | HEATR5A  | 25938  | ENSG00000129493 | validated |
| tarbase | hsa-miR-192-5p  | HEATR5A  | 25938  | ENSG00000129493 | validated |
| tarbase | hsa-miR-106b-5p | FOXA1    | 3169   | ENSG00000129514 | validated |
| tarbase | hsa-miR-212-3p  | FOXA1    | 3169   | ENSG00000129514 | validated |
| tarbase | hsa-miR-301a-3p | FOXA1    | 3169   | ENSG00000129514 | validated |
| tarbase | hsa-miR-106b-5p | EAPP     | 55837  | ENSG00000129518 | validated |
| tarbase | hsa-miR-181a-5p | EAPP     | 55837  | ENSG00000129518 | validated |
| tarbase | hsa-miR-505-3p  | NEDD8    | 4738   | ENSG00000129559 | validated |
| tarbase | hsa-miR-18a-5p  | DAD1     | 1603   | ENSG00000129562 | validated |
| tarbase | hsa-miR-326     | DAD1     | 1603   | ENSG00000129562 | validated |
| tarbase | hsa-miR-15b-5p  | EPB41L4A | 64097  | ENSG00000129595 | validated |
| tarbase | hsa-miR-582-3p  | EPB41L4A | 64097  | ENSG00000129595 | validated |
| tarbase | hsa-miR-144-3p  | REEP5    | 7905   | ENSG00000129625 | validated |
| tarbase | hsa-miR-15b-5p  | REEP5    | 7905   | ENSG00000129625 | validated |
| tarbase | hsa-miR-18a-5p  | REEP5    | 7905   | ENSG00000129625 | validated |
| tarbase | hsa-miR-181a-5p | REEP5    | 7905   | ENSG00000129625 | validated |
| tarbase | hsa-miR-21-5p   | ITFG1    | 81533  | ENSG00000129636 | validated |
| tarbase | hsa-miR-106b-5p | SEC14L1  | 6397   | ENSG00000129657 | validated |
| tarbase | hsa-miR-106b-5p | ARHGEF6  | 9459   | ENSG00000129675 | validated |
| tarbase | hsa-miR-15b-5p  | CHRNA10  | 57053  | ENSG00000129749 | validated |
| tarbase | hsa-miR-296-5p  | KLF16    | 83855  | ENSG00000129911 | validated |
| tarbase | hsa-miR-301a-3p | KLF16    | 83855  | ENSG00000129911 | validated |
| tarbase | hsa-miR-15b-5p  | PGAP6    | 58986  | ENSG00000129925 | validated |
| tarbase | hsa-miR-181a-5p | PUDP     | 8226   | ENSG00000130021 | validated |
| tarbase | hsa-miR-106b-5p | PUDP     | 8226   | ENSG00000130021 | validated |
| tarbase | hsa-miR-106b-5p | PHF10    | 55274  | ENSG00000130024 | validated |
| tarbase | hsa-miR-181a-5p | PHF10    | 55274  | ENSG00000130024 | validated |
| tarbase | hsa-miR-222-3p  | PHF10    | 55274  | ENSG00000130024 | validated |
| tarbase | hsa-miR-301a-3p | PHF10    | 55274  | ENSG00000130024 | validated |
| tarbase | hsa-miR-326     | PHF10    | 55274  | ENSG00000130024 | validated |
| tarbase | hsa-miR-212-3p  | KCNA5    | 3741   | ENSG00000130037 | validated |
| tarbase | hsa-miR-144-3p  | SAT1     | 6303   | ENSG00000130066 | validated |
| tarbase | hsa-miR-15b-5p  | SAT1     | 6303   | ENSG00000130066 | validated |

|         |                 |          |        |                 |           |
|---------|-----------------|----------|--------|-----------------|-----------|
| tarbase | hsa-miR-18a-5p  | SH3BP4   | 23677  | ENSG00000130147 | validated |
| tarbase | hsa-miR-21-5p   | SH3BP4   | 23677  | ENSG00000130147 | validated |
| tarbase | hsa-miR-106b-5p | MOSPD2   | 158747 | ENSG00000130150 | validated |
| tarbase | hsa-miR-15b-5p  | MOSPD2   | 158747 | ENSG00000130150 | validated |
| tarbase | hsa-miR-181a-5p | MOSPD2   | 158747 | ENSG00000130150 | validated |
| tarbase | hsa-miR-18a-5p  | MOSPD2   | 158747 | ENSG00000130150 | validated |
| tarbase | hsa-miR-15b-5p  | DOCK6    | 57572  | ENSG00000130158 | validated |
| tarbase | hsa-miR-21-5p   | DOCK6    | 57572  | ENSG00000130158 | validated |
| tarbase | hsa-miR-18a-5p  | LDLR     | 3949   | ENSG00000130164 | validated |
| tarbase | hsa-miR-192-5p  | LDLR     | 3949   | ENSG00000130164 | validated |
| tarbase | hsa-miR-192-5p  | PRKCSH   | 5589   | ENSG00000130175 | validated |
| tarbase | hsa-miR-296-5p  | PRKCSH   | 5589   | ENSG00000130175 | validated |
| tarbase | hsa-miR-212-3p  | CNN1     | 1264   | ENSG00000130176 | validated |
| tarbase | hsa-miR-192-5p  | TOMM40   | 10452  | ENSG00000130204 | validated |
| tarbase | hsa-miR-181a-5p | LRCH2    | 57631  | ENSG00000130224 | validated |
| tarbase | hsa-miR-15b-5p  | XPO7     | 23039  | ENSG00000130227 | validated |
| tarbase | hsa-miR-21-5p   | XPO7     | 23039  | ENSG00000130227 | validated |
| tarbase | hsa-miR-301a-3p | XPO7     | 23039  | ENSG00000130227 | validated |
| tarbase | hsa-miR-582-3p  | XPO7     | 23039  | ENSG00000130227 | validated |
| tarbase | hsa-miR-21-5p   | SAFB2    | 9667   | ENSG00000130254 | validated |
| tarbase | hsa-miR-326     | RPL36    | 25873  | ENSG00000130255 | validated |
| tarbase | hsa-miR-301a-3p | KIF1A    | 547    | ENSG00000130294 | validated |
| tarbase | hsa-miR-326     | KIF1A    | 547    | ENSG00000130294 | validated |
| tarbase | hsa-miR-18a-5p  | GTPBP3   | 84705  | ENSG00000130299 | validated |
| tarbase | hsa-miR-15b-5p  | COLGALT1 | 79709  | ENSG00000130309 | validated |
| tarbase | hsa-miR-181a-5p | COLGALT1 | 79709  | ENSG00000130309 | validated |
| tarbase | hsa-miR-21-5p   | COLGALT1 | 79709  | ENSG00000130309 | validated |
| tarbase | hsa-miR-21-5p   | PGLS     | 25796  | ENSG00000130313 | validated |
| tarbase | hsa-miR-106b-5p | TULP4    | 56995  | ENSG00000130338 | validated |
| tarbase | hsa-miR-212-3p  | TULP4    | 56995  | ENSG00000130338 | validated |
| tarbase | hsa-miR-296-5p  | TULP4    | 56995  | ENSG00000130338 | validated |
| tarbase | hsa-miR-301a-3p | TULP4    | 56995  | ENSG00000130338 | validated |
| tarbase | hsa-miR-181a-5p | TULP4    | 56995  | ENSG00000130338 | validated |
| tarbase | hsa-miR-106b-5p | SNX9     | 51429  | ENSG00000130340 | validated |
| tarbase | hsa-miR-181a-5p | SNX9     | 51429  | ENSG00000130340 | validated |
| tarbase | hsa-miR-582-5p  | SNX9     | 51429  | ENSG00000130340 | validated |
| tarbase | hsa-miR-212-3p  | MTRES1   | 51250  | ENSG00000130349 | validated |
| tarbase | hsa-miR-212-3p  | RSPH3    | 83861  | ENSG00000130363 | validated |
| tarbase | hsa-miR-21-5p   | AFDN     | 4301   | ENSG00000130396 | validated |
| tarbase | hsa-miR-15b-5p  | STK33    | 65975  | ENSG00000130413 | validated |
| tarbase | hsa-miR-15b-5p  | ARPC1B   | 10095  | ENSG00000130429 | validated |
| tarbase | hsa-miR-181a-5p | ARPC1B   | 10095  | ENSG00000130429 | validated |
| tarbase | hsa-miR-15b-5p  | ZSWIM6   | 57688  | ENSG00000130449 | validated |
| tarbase | hsa-miR-181a-5p | ZSWIM6   | 57688  | ENSG00000130449 | validated |
| tarbase | hsa-miR-212-3p  | ZSWIM6   | 57688  | ENSG00000130449 | validated |
| tarbase | hsa-miR-21-5p   | ZSWIM6   | 57688  | ENSG00000130449 | validated |
| tarbase | hsa-miR-222-3p  | ZSWIM6   | 57688  | ENSG00000130449 | validated |
| tarbase | hsa-miR-301a-3p | ZSWIM6   | 57688  | ENSG00000130449 | validated |
| tarbase | hsa-miR-106b-5p | ZSWIM6   | 57688  | ENSG00000130449 | validated |
| tarbase | hsa-miR-15b-5p  | UNC13A   | 23025  | ENSG00000130477 | validated |
| tarbase | hsa-miR-21-5p   | MAP1S    | 55201  | ENSG00000130479 | validated |
| tarbase | hsa-miR-301a-3p | PXDN     | 7837   | ENSG00000130508 | validated |
| tarbase | hsa-miR-505-3p  | PXDN     | 7837   | ENSG00000130508 | validated |
| tarbase | hsa-miR-106b-5p | GDF15    | 9518   | ENSG00000130513 | validated |
| tarbase | hsa-miR-181a-5p | GDF15    | 9518   | ENSG00000130513 | validated |
| tarbase | hsa-miR-296-5p  | IQCN     | 80726  | ENSG00000130518 | validated |
| tarbase | hsa-miR-212-3p  | HRC      | 3270   | ENSG00000130528 | validated |
| tarbase | hsa-miR-212-3p  | TRPM4    | 54795  | ENSG00000130529 | validated |
| tarbase | hsa-miR-582-3p  | CAMSAP1  | 157922 | ENSG00000130559 | validated |
| tarbase | hsa-miR-181a-5p | CAMSAP1  | 157922 | ENSG00000130559 | validated |
| tarbase | hsa-miR-15b-5p  | ZBTB46   | 140685 | ENSG00000130584 | validated |
| tarbase | hsa-miR-212-3p  | HELZ2    | 85441  | ENSG00000130589 | validated |
| tarbase | hsa-miR-106b-5p | SAMD10   | 140700 | ENSG00000130590 | validated |
| tarbase | hsa-miR-15b-5p  | COL5A1   | 1289   | ENSG00000130635 | validated |
| tarbase | hsa-miR-181a-5p | COL5A1   | 1289   | ENSG00000130635 | validated |
| tarbase | hsa-miR-18a-5p  | ATXN10   | 25814  | ENSG00000130638 | validated |
| tarbase | hsa-miR-301a-3p | ATXN10   | 25814  | ENSG00000130638 | validated |
| tarbase | hsa-miR-106b-5p | ZNF337   | 26152  | ENSG00000130684 | validated |
| tarbase | hsa-miR-301a-3p | ZNF337   | 26152  | ENSG00000130684 | validated |
| tarbase | hsa-miR-301a-3p | TAF4     | 6874   | ENSG00000130699 | validated |
| tarbase | hsa-miR-582-3p  | ASS1     | 445    | ENSG00000130707 | validated |

|         |                 |          |        |                 |           |
|---------|-----------------|----------|--------|-----------------|-----------|
| tarbase | hsa-miR-144-3p  | POMT1    | 10585  | ENSG00000130714 | validated |
| tarbase | hsa-miR-212-3p  | POMT1    | 10585  | ENSG00000130714 | validated |
| tarbase | hsa-miR-21-5p   | POMT1    | 10585  | ENSG00000130714 | validated |
| tarbase | hsa-miR-15b-5p  | PRRC2B   | 84726  | ENSG00000130723 | validated |
| tarbase | hsa-miR-18a-5p  | PRRC2B   | 84726  | ENSG00000130723 | validated |
| tarbase | hsa-miR-296-5p  | PRRC2B   | 84726  | ENSG00000130723 | validated |
| tarbase | hsa-miR-296-5p  | TRIM28   | 10155  | ENSG00000130726 | validated |
| tarbase | hsa-miR-301a-3p | TRIM28   | 10155  | ENSG00000130726 | validated |
| tarbase | hsa-miR-582-3p  | TRIM28   | 10155  | ENSG00000130726 | validated |
| tarbase | hsa-miR-15b-5p  | YIPF2    | 78992  | ENSG00000130733 | validated |
| tarbase | hsa-miR-296-5p  | YIPF2    | 78992  | ENSG00000130733 | validated |
| tarbase | hsa-miR-15b-5p  | EIF2S3   | 1968   | ENSG00000130741 | validated |
| tarbase | hsa-miR-106b-5p | ZC3H4    | 23211  | ENSG00000130749 | validated |
| tarbase | hsa-miR-21-5p   | ZC3H4    | 23211  | ENSG00000130749 | validated |
| tarbase | hsa-miR-15b-5p  | LRRC47   | 57470  | ENSG00000130764 | validated |
| tarbase | hsa-miR-296-5p  | LRRC47   | 57470  | ENSG00000130764 | validated |
| tarbase | hsa-miR-222-3p  | SESN2    | 83667  | ENSG00000130766 | validated |
| tarbase | hsa-miR-301a-3p | SESN2    | 83667  | ENSG00000130766 | validated |
| tarbase | hsa-miR-301a-3p | ATP5F1   | 93974  | ENSG00000130770 | validated |
| tarbase | hsa-miR-106b-5p | CLIP1    | 6249   | ENSG00000130779 | validated |
| tarbase | hsa-miR-181a-5p | CLIP1    | 6249   | ENSG00000130779 | validated |
| tarbase | hsa-miR-18a-5p  | CLIP1    | 6249   | ENSG00000130779 | validated |
| tarbase | hsa-miR-181a-5p | HIP1R    | 9026   | ENSG00000130787 | validated |
| tarbase | hsa-miR-181a-5p | ZNF317   | 57693  | ENSG00000130803 | validated |
| tarbase | hsa-miR-301a-3p | DNMT1    | 1786   | ENSG00000130816 | validated |
| tarbase | hsa-miR-15b-5p  | SLC6A8   | 6535   | ENSG00000130821 | validated |
| tarbase | hsa-miR-15b-5p  | DKC1     | 1736   | ENSG00000130826 | validated |
| tarbase | hsa-miR-181a-5p | DKC1     | 1736   | ENSG00000130826 | validated |
| tarbase | hsa-miR-222-3p  | DKC1     | 1736   | ENSG00000130826 | validated |
| tarbase | hsa-miR-106b-5p | ZNF236   | 7776   | ENSG00000130856 | validated |
| tarbase | hsa-miR-15b-5p  | ZNF236   | 7776   | ENSG00000130856 | validated |
| tarbase | hsa-miR-181a-5p | ZNF236   | 7776   | ENSG00000130856 | validated |
| tarbase | hsa-miR-301a-3p | NOL11    | 25926  | ENSG00000130935 | validated |
| tarbase | hsa-miR-15b-5p  | UBE4B    | 10277  | ENSG00000130939 | validated |
| tarbase | hsa-miR-301a-3p | UBE4B    | 10277  | ENSG00000130939 | validated |
| tarbase | hsa-miR-326     | CASZ1    | 54897  | ENSG00000130940 | validated |
| tarbase | hsa-miR-222-3p  | PRRG1    | 5638   | ENSG00000130962 | validated |
| tarbase | hsa-miR-21-5p   | UBA1     | 7317   | ENSG00000130985 | validated |
| tarbase | hsa-miR-212-3p  | PPIL4    | 85313  | ENSG00000131013 | validated |
| tarbase | hsa-miR-106b-5p | PPIL4    | 85313  | ENSG00000131013 | validated |
| tarbase | hsa-miR-192-5p  | AKAP12   | 9590   | ENSG00000131016 | validated |
| tarbase | hsa-miR-21-5p   | SYNE1    | 23345  | ENSG00000131018 | validated |
| tarbase | hsa-miR-181a-5p | SYNE1    | 23345  | ENSG00000131018 | validated |
| tarbase | hsa-miR-15b-5p  | LATS1    | 9113   | ENSG00000131023 | validated |
| tarbase | hsa-miR-181a-5p | LATS1    | 9113   | ENSG00000131023 | validated |
| tarbase | hsa-miR-181a-5p | AAR2     | 25980  | ENSG00000131043 | validated |
| tarbase | hsa-miR-181a-5p | RBM39    | 9584   | ENSG00000131051 | validated |
| tarbase | hsa-miR-181a-5p | ACSS2    | 55902  | ENSG00000131069 | validated |
| tarbase | hsa-miR-212-3p  | EDA2R    | 60401  | ENSG00000131080 | validated |
| tarbase | hsa-miR-15b-5p  | GFAP     | 2670   | ENSG00000131095 | validated |
| tarbase | hsa-miR-212-3p  | ATP6V1E1 | 529    | ENSG00000131100 | validated |
| tarbase | hsa-miR-181a-5p | ZNF227   | 7770   | ENSG00000131115 | validated |
| tarbase | hsa-miR-192-5p  | ZNF227   | 7770   | ENSG00000131115 | validated |
| tarbase | hsa-miR-222-3p  | ZNF227   | 7770   | ENSG00000131115 | validated |
| tarbase | hsa-miR-15b-5p  | ZNF428   | 126299 | ENSG00000131116 | validated |
| tarbase | hsa-miR-582-3p  | COX4I1   | 1327   | ENSG00000131143 | validated |
| tarbase | hsa-miR-181a-5p | GSE1     | 23199  | ENSG00000131149 | validated |
| tarbase | hsa-miR-192-5p  | GSE1     | 23199  | ENSG00000131149 | validated |
| tarbase | hsa-miR-222-3p  | GSE1     | 23199  | ENSG00000131149 | validated |
| tarbase | hsa-miR-326     | GSE1     | 23199  | ENSG00000131149 | validated |
| tarbase | hsa-miR-296-5p  | CHMP1A   | 5119   | ENSG00000131165 | validated |
| tarbase | hsa-miR-181a-5p | CAP1     | 10487  | ENSG00000131236 | validated |
| tarbase | hsa-miR-212-3p  | CAP1     | 10487  | ENSG00000131236 | validated |
| tarbase | hsa-miR-21-5p   | CAP1     | 10487  | ENSG00000131236 | validated |
| tarbase | hsa-miR-296-5p  | CAP1     | 10487  | ENSG00000131236 | validated |
| tarbase | hsa-miR-192-5p  | RLIM     | 51132  | ENSG00000131263 | validated |
| tarbase | hsa-miR-301a-3p | ABCB7    | 22     | ENSG00000131269 | validated |
| tarbase | hsa-miR-15b-5p  | TRAF3    | 7187   | ENSG00000131323 | validated |
| tarbase | hsa-miR-301a-3p | HAUS8    | 93323  | ENSG00000131351 | validated |
| tarbase | hsa-miR-15b-5p  | MRPS25   | 64432  | ENSG00000131368 | validated |
| tarbase | hsa-miR-301a-3p | SH3BP5   | 9467   | ENSG00000131370 | validated |



|         |                 |          |       |                 |           |
|---------|-----------------|----------|-------|-----------------|-----------|
| tarbase | hsa-miR-106b-5p | CAPN7    | 23473 | ENSG00000131375 | validated |
| tarbase | hsa-miR-18a-5p  | CAPN7    | 23473 | ENSG00000131375 | validated |
| tarbase | hsa-miR-106b-5p | RBSN     | 64145 | ENSG00000131381 | validated |
| tarbase | hsa-miR-15b-5p  | RBSN     | 64145 | ENSG00000131381 | validated |
| tarbase | hsa-miR-21-5p   | RBSN     | 64145 | ENSG00000131381 | validated |
| tarbase | hsa-miR-582-5p  | RBSN     | 64145 | ENSG00000131381 | validated |
| tarbase | hsa-miR-301a-3p | SLC6A6   | 6533  | ENSG00000131389 | validated |
| tarbase | hsa-miR-18a-5p  | NR1H2    | 7376  | ENSG00000131408 | validated |
| tarbase | hsa-miR-326     | NR1H2    | 7376  | ENSG00000131408 | validated |
| tarbase | hsa-miR-181a-5p | KIF3A    | 11127 | ENSG00000131437 | validated |
| tarbase | hsa-miR-582-5p  | KIF3A    | 11127 | ENSG00000131437 | validated |
| tarbase | hsa-miR-18a-5p  | KIF3A    | 11127 | ENSG00000131437 | validated |
| tarbase | hsa-miR-144-3p  | GFPT2    | 9945  | ENSG00000131459 | validated |
| tarbase | hsa-miR-582-5p  | GFPT2    | 9945  | ENSG00000131459 | validated |
| tarbase | hsa-miR-301a-3p | TUBG1    | 7283  | ENSG00000131462 | validated |
| tarbase | hsa-miR-212-3p  | PSME3    | 10197 | ENSG00000131467 | validated |
| tarbase | hsa-miR-222-3p  | PSME3    | 10197 | ENSG00000131467 | validated |
| tarbase | hsa-miR-582-3p  | PSME3    | 10197 | ENSG00000131467 | validated |
| tarbase | hsa-miR-192-5p  | RPL27    | 6155  | ENSG00000131469 | validated |
| tarbase | hsa-miR-18a-5p  | RPL27    | 6155  | ENSG00000131469 | validated |
| tarbase | hsa-miR-582-3p  | PSMC3IP  | 29893 | ENSG00000131470 | validated |
| tarbase | hsa-miR-21-5p   | ACLY     | 47    | ENSG00000131473 | validated |
| tarbase | hsa-miR-326     | ACLY     | 47    | ENSG00000131473 | validated |
| tarbase | hsa-miR-582-5p  | ACLY     | 47    | ENSG00000131473 | validated |
| tarbase | hsa-miR-106b-5p | VPS25    | 84313 | ENSG00000131475 | validated |
| tarbase | hsa-miR-18a-5p  | VPS25    | 84313 | ENSG00000131475 | validated |
| tarbase | hsa-miR-21-5p   | DIAPH1   | 1729  | ENSG00000131504 | validated |
| tarbase | hsa-miR-18a-5p  | NDFIP1   | 80762 | ENSG00000131507 | validated |
| tarbase | hsa-miR-192-5p  | EXOC4    | 60412 | ENSG00000131558 | validated |
| tarbase | hsa-miR-21-5p   | EXOC4    | 60412 | ENSG00000131558 | validated |
| tarbase | hsa-miR-106b-5p | MAP1B    | 4131  | ENSG00000131711 | validated |
| tarbase | hsa-miR-15b-5p  | MAP1B    | 4131  | ENSG00000131711 | validated |
| tarbase | hsa-miR-181a-5p | MAP1B    | 4131  | ENSG00000131711 | validated |
| tarbase | hsa-miR-18a-5p  | MAP1B    | 4131  | ENSG00000131711 | validated |
| tarbase | hsa-miR-301a-3p | MAP1B    | 4131  | ENSG00000131711 | validated |
| tarbase | hsa-miR-505-3p  | IL13RA1  | 3597  | ENSG00000131724 | validated |
| tarbase | hsa-miR-222-3p  | ZCCHC9   | 84240 | ENSG00000131732 | validated |
| tarbase | hsa-miR-181a-5p | ZCCHC9   | 84240 | ENSG00000131732 | validated |
| tarbase | hsa-miR-301a-3p | TOP2A    | 7153  | ENSG00000131747 | validated |
| tarbase | hsa-miR-106b-5p | TOP2A    | 7153  | ENSG00000131747 | validated |
| tarbase | hsa-miR-212-3p  | TOP2A    | 7153  | ENSG00000131747 | validated |
| tarbase | hsa-miR-18a-5p  | STARD3   | 10948 | ENSG00000131748 | validated |
| tarbase | hsa-miR-106b-5p | PRKAB2   | 5565  | ENSG00000131791 | validated |
| tarbase | hsa-miR-15b-5p  | PRKAB2   | 5565  | ENSG00000131791 | validated |
| tarbase | hsa-miR-222-3p  | PRKAB2   | 5565  | ENSG00000131791 | validated |
| tarbase | hsa-miR-296-5p  | PRKAB2   | 5565  | ENSG00000131791 | validated |
| tarbase | hsa-miR-326     | PRKAB2   | 5565  | ENSG00000131791 | validated |
| tarbase | hsa-miR-106b-5p | PDHA1    | 5160  | ENSG00000131828 | validated |
| tarbase | hsa-miR-192-5p  | PDHA1    | 5160  | ENSG00000131828 | validated |
| tarbase | hsa-miR-181a-5p | MCCC2    | 64087 | ENSG00000131844 | validated |
| tarbase | hsa-miR-181a-5p | ZNF132   | 7691  | ENSG00000131849 | validated |
| tarbase | hsa-miR-212-3p  | ZNF132   | 7691  | ENSG00000131849 | validated |
| tarbase | hsa-miR-15b-5p  | SELENOS  | 55829 | ENSG00000131871 | validated |
| tarbase | hsa-miR-212-3p  | SELENOS  | 55829 | ENSG00000131871 | validated |
| tarbase | hsa-miR-212-3p  | CHSY1    | 22856 | ENSG00000131873 | validated |
| tarbase | hsa-miR-222-3p  | CHSY1    | 22856 | ENSG00000131873 | validated |
| tarbase | hsa-miR-106b-5p | THAP1    | 55145 | ENSG00000131931 | validated |
| tarbase | hsa-miR-212-3p  | THAP1    | 55145 | ENSG00000131931 | validated |
| tarbase | hsa-miR-18a-5p  | RHPN2    | 85415 | ENSG00000131941 | validated |
| tarbase | hsa-miR-181a-5p | C19orf12 | 83636 | ENSG00000131943 | validated |
| tarbase | hsa-miR-106b-5p | LGALS3   | 3958  | ENSG00000131981 | validated |
| tarbase | hsa-miR-212-3p  | DNAJB1   | 3337  | ENSG00000132002 | validated |
| tarbase | hsa-miR-326     | C19orf57 | 79173 | ENSG00000132016 | validated |
| tarbase | hsa-miR-181a-5p | TRIM21   | 6737  | ENSG00000132109 | validated |
| tarbase | hsa-miR-212-3p  | TRIM21   | 6737  | ENSG00000132109 | validated |
| tarbase | hsa-miR-296-5p  | LRRRC41  | 10489 | ENSG00000132128 | validated |
| tarbase | hsa-miR-21-5p   | DHX30    | 22907 | ENSG00000132153 | validated |
| tarbase | hsa-miR-296-5p  | DHX30    | 22907 | ENSG00000132153 | validated |
| tarbase | hsa-miR-301a-3p | DHX30    | 22907 | ENSG00000132153 | validated |
| tarbase | hsa-miR-326     | RAF1     | 5894  | ENSG00000132155 | validated |
| tarbase | hsa-miR-301a-3p | PPARG    | 5468  | ENSG00000132170 | validated |

|         |                 |         |        |                 |           |
|---------|-----------------|---------|--------|-----------------|-----------|
| tarbase | hsa-miR-582-5p  | ENOSF1  | 55556  | ENSG00000132199 | validated |
| tarbase | hsa-miR-301a-3p | ARFIP2  | 23647  | ENSG00000132254 | validated |
| tarbase | hsa-miR-212-3p  | TRIM5   | 85363  | ENSG00000132256 | validated |
| tarbase | hsa-miR-18a-5p  | TRIM22  | 10346  | ENSG00000132274 | validated |
| tarbase | hsa-miR-212-3p  | TRIM22  | 10346  | ENSG00000132274 | validated |
| tarbase | hsa-miR-15b-5p  | TIMM10B | 26515  | ENSG00000132286 | validated |
| tarbase | hsa-miR-181a-5p | EFR3A   | 23167  | ENSG00000132294 | validated |
| tarbase | hsa-miR-18a-5p  | EFR3A   | 23167  | ENSG00000132294 | validated |
| tarbase | hsa-miR-21-5p   | EFR3A   | 23167  | ENSG00000132294 | validated |
| tarbase | hsa-miR-505-3p  | EFR3A   | 23167  | ENSG00000132294 | validated |
| tarbase | hsa-miR-18a-5p  | IMMT    | 10989  | ENSG00000132305 | validated |
| tarbase | hsa-miR-106b-5p | PER2    | 8864   | ENSG00000132326 | validated |
| tarbase | hsa-miR-15b-5p  | PER2    | 8864   | ENSG00000132326 | validated |
| tarbase | hsa-miR-222-3p  | PER2    | 8864   | ENSG00000132326 | validated |
| tarbase | hsa-miR-18a-5p  | SCLY    | 51540  | ENSG00000132330 | validated |
| tarbase | hsa-miR-15b-5p  | RAN     | 5901   | ENSG00000132341 | validated |
| tarbase | hsa-miR-106b-5p | PRKAA1  | 5562   | ENSG00000132356 | validated |
| tarbase | hsa-miR-505-3p  | PRKAA1  | 5562   | ENSG00000132356 | validated |
| tarbase | hsa-miR-106b-5p | CLUH    | 23277  | ENSG00000132361 | validated |
| tarbase | hsa-miR-212-3p  | INPP5K  | 51763  | ENSG00000132376 | validated |
| tarbase | hsa-miR-21-5p   | INPP5K  | 51763  | ENSG00000132376 | validated |
| tarbase | hsa-miR-21-5p   | MYBBP1A | 10514  | ENSG00000132382 | validated |
| tarbase | hsa-miR-192-5p  | RPA1    | 6117   | ENSG00000132383 | validated |
| tarbase | hsa-miR-106b-5p | UBE2G1  | 7326   | ENSG00000132388 | validated |
| tarbase | hsa-miR-181a-5p | UBE2G1  | 7326   | ENSG00000132388 | validated |
| tarbase | hsa-miR-582-5p  | UBE2G1  | 7326   | ENSG00000132388 | validated |
| tarbase | hsa-miR-212-3p  | TMEM128 | 85013  | ENSG00000132406 | validated |
| tarbase | hsa-miR-582-5p  | COQ3    | 51805  | ENSG00000132423 | validated |
| tarbase | hsa-miR-106b-5p | PNISR   | 25957  | ENSG00000132424 | validated |
| tarbase | hsa-miR-181a-5p | PNISR   | 25957  | ENSG00000132424 | validated |
| tarbase | hsa-miR-582-5p  | PNISR   | 25957  | ENSG00000132424 | validated |
| tarbase | hsa-miR-106b-5p | FIGNL1  | 63979  | ENSG00000132436 | validated |
| tarbase | hsa-miR-106b-5p | GRSF1   | 2926   | ENSG00000132463 | validated |
| tarbase | hsa-miR-15b-5p  | GRSF1   | 2926   | ENSG00000132463 | validated |
| tarbase | hsa-miR-21-5p   | GRSF1   | 2926   | ENSG00000132463 | validated |
| tarbase | hsa-miR-15b-5p  | ANKRD17 | 26057  | ENSG00000132466 | validated |
| tarbase | hsa-miR-21-5p   | ANKRD17 | 26057  | ENSG00000132466 | validated |
| tarbase | hsa-miR-222-3p  | ITGB4   | 3691   | ENSG00000132470 | validated |
| tarbase | hsa-miR-181a-5p | WBP2    | 23558  | ENSG00000132471 | validated |
| tarbase | hsa-miR-212-3p  | H3-3B   | 3021   | ENSG00000132475 | validated |
| tarbase | hsa-miR-181a-5p | ZRANB2  | 9406   | ENSG00000132485 | validated |
| tarbase | hsa-miR-15b-5p  | EIF5A   | 1984   | ENSG00000132507 | validated |
| tarbase | hsa-miR-21-5p   | EIF5A   | 1984   | ENSG00000132507 | validated |
| tarbase | hsa-miR-212-3p  | KDM6B   | 23135  | ENSG00000132510 | validated |
| tarbase | hsa-miR-296-5p  | KDM6B   | 23135  | ENSG00000132510 | validated |
| tarbase | hsa-miR-181a-5p | KDM6B   | 23135  | ENSG00000132510 | validated |
| tarbase | hsa-miR-18a-5p  | GUCY2D  | 3000   | ENSG00000132518 | validated |
| tarbase | hsa-miR-212-3p  | XAF1    | 54739  | ENSG00000132530 | validated |
| tarbase | hsa-miR-192-5p  | DLG4    | 1742   | ENSG00000132535 | validated |
| tarbase | hsa-miR-212-3p  | DLG4    | 1742   | ENSG00000132535 | validated |
| tarbase | hsa-miR-15b-5p  | VPS13B  | 157680 | ENSG00000132549 | validated |
| tarbase | hsa-miR-21-5p   | VPS13B  | 157680 | ENSG00000132549 | validated |
| tarbase | hsa-miR-296-5p  | REEP2   | 51308  | ENSG00000132563 | validated |
| tarbase | hsa-miR-301a-3p | REEP2   | 51308  | ENSG00000132563 | validated |
| tarbase | hsa-miR-296-5p  | FLOT2   | 2319   | ENSG00000132589 | validated |
| tarbase | hsa-miR-21-5p   | ERAL1   | 26284  | ENSG00000132591 | validated |
| tarbase | hsa-miR-18a-5p  | ERAL1   | 26284  | ENSG00000132591 | validated |
| tarbase | hsa-miR-18a-5p  | NIP7    | 51388  | ENSG00000132603 | validated |
| tarbase | hsa-miR-181a-5p | NIP7    | 51388  | ENSG00000132603 | validated |
| tarbase | hsa-miR-15b-5p  | MTSS2   | 92154  | ENSG00000132613 | validated |
| tarbase | hsa-miR-15b-5p  | ANKEF1  | 63926  | ENSG00000132623 | validated |
| tarbase | hsa-miR-326     | PCED1A  | 64773  | ENSG00000132635 | validated |
| tarbase | hsa-miR-582-3p  | PCED1A  | 64773  | ENSG00000132635 | validated |
| tarbase | hsa-miR-301a-3p | SNAP25  | 6616   | ENSG00000132639 | validated |
| tarbase | hsa-miR-106b-5p | BTBD3   | 22903  | ENSG00000132640 | validated |
| tarbase | hsa-miR-144-3p  | BTBD3   | 22903  | ENSG00000132640 | validated |
| tarbase | hsa-miR-15b-5p  | BTBD3   | 22903  | ENSG00000132640 | validated |
| tarbase | hsa-miR-106b-5p | PCNA    | 5111   | ENSG00000132646 | validated |
| tarbase | hsa-miR-15b-5p  | POLR3F  | 10621  | ENSG00000132664 | validated |
| tarbase | hsa-miR-144-3p  | RIN2    | 54453  | ENSG00000132669 | validated |
| tarbase | hsa-miR-505-3p  | RIN2    | 54453  | ENSG00000132669 | validated |

|         |                 |          |        |                 |           |
|---------|-----------------|----------|--------|-----------------|-----------|
| tarbase | hsa-miR-106b-5p | PTPRA    | 5786   | ENSG00000132670 | validated |
| tarbase | hsa-miR-15b-5p  | KHDC4    | 22889  | ENSG00000132680 | validated |
| tarbase | hsa-miR-192-5p  | KHDC4    | 22889  | ENSG00000132680 | validated |
| tarbase | hsa-miR-212-3p  | KHDC4    | 22889  | ENSG00000132680 | validated |
| tarbase | hsa-miR-15b-5p  | ARHGEF11 | 9826   | ENSG00000132694 | validated |
| tarbase | hsa-miR-15b-5p  | DCAF8    | 50717  | ENSG00000132716 | validated |
| tarbase | hsa-miR-192-5p  | DCAF8    | 50717  | ENSG00000132716 | validated |
| tarbase | hsa-miR-181a-5p | MMACHC   | 25974  | ENSG00000132763 | validated |
| tarbase | hsa-miR-18a-5p  | TOE1     | 114034 | ENSG00000132773 | validated |
| tarbase | hsa-miR-192-5p  | NASP     | 4678   | ENSG00000132780 | validated |
| tarbase | hsa-miR-212-3p  | NASP     | 4678   | ENSG00000132780 | validated |
| tarbase | hsa-miR-212-3p  | LPIN3    | 64900  | ENSG00000132793 | validated |
| tarbase | hsa-miR-181a-5p | RBM38    | 55544  | ENSG00000132819 | validated |
| tarbase | hsa-miR-21-5p   | OSER1    | 51526  | ENSG00000132823 | validated |
| tarbase | hsa-miR-15b-5p  | SERINC3  | 10955  | ENSG00000132824 | validated |
| tarbase | hsa-miR-222-3p  | SERINC3  | 10955  | ENSG00000132824 | validated |
| tarbase | hsa-miR-181a-5p | PPP1R3D  | 5509   | ENSG00000132825 | validated |
| tarbase | hsa-miR-181a-5p | AP3B1    | 8546   | ENSG00000132842 | validated |
| tarbase | hsa-miR-21-5p   | AP3B1    | 8546   | ENSG00000132842 | validated |
| tarbase | hsa-miR-301a-3p | ZBED3    | 84327  | ENSG00000132846 | validated |
| tarbase | hsa-miR-18a-5p  | PATJ     | 10207  | ENSG00000132849 | validated |
| tarbase | hsa-miR-15b-5p  | SYT4     | 6860   | ENSG00000132872 | validated |
| tarbase | hsa-miR-181a-5p | SYT4     | 6860   | ENSG00000132872 | validated |
| tarbase | hsa-miR-106b-5p | DCTN4    | 51164  | ENSG00000132912 | validated |
| tarbase | hsa-miR-15b-5p  | DCTN4    | 51164  | ENSG00000132912 | validated |
| tarbase | hsa-miR-212-3p  | DCTN4    | 51164  | ENSG00000132912 | validated |
| tarbase | hsa-miR-21-5p   | DCTN4    | 51164  | ENSG00000132912 | validated |
| tarbase | hsa-miR-582-5p  | DCTN4    | 51164  | ENSG00000132912 | validated |
| tarbase | hsa-miR-181a-5p | DCTN4    | 51164  | ENSG00000132912 | validated |
| tarbase | hsa-miR-212-3p  | ZMYM5    | 9205   | ENSG00000132950 | validated |
| tarbase | hsa-miR-106b-5p | USPL1    | 10208  | ENSG00000132952 | validated |
| tarbase | hsa-miR-181a-5p | USPL1    | 10208  | ENSG00000132952 | validated |
| tarbase | hsa-miR-212-3p  | XPO4     | 64328  | ENSG00000132953 | validated |
| tarbase | hsa-miR-18a-5p  | XPO4     | 64328  | ENSG00000132953 | validated |
| tarbase | hsa-miR-106b-5p | WASF3    | 10810  | ENSG00000132970 | validated |
| tarbase | hsa-miR-21-5p   | RNF17    | 56163  | ENSG00000132972 | validated |
| tarbase | hsa-miR-181a-5p | CHRM3    | 1131   | ENSG00000133019 | validated |
| tarbase | hsa-miR-15b-5p  | CHRM3    | 1131   | ENSG00000133019 | validated |
| tarbase | hsa-miR-181a-5p | MYH10    | 4628   | ENSG00000133026 | validated |
| tarbase | hsa-miR-21-5p   | MYH10    | 4628   | ENSG00000133026 | validated |
| tarbase | hsa-miR-106b-5p | SCO1     | 6341   | ENSG00000133028 | validated |
| tarbase | hsa-miR-21-5p   | SCO1     | 6341   | ENSG00000133028 | validated |
| tarbase | hsa-miR-296-5p  | SCO1     | 6341   | ENSG00000133028 | validated |
| tarbase | hsa-miR-301a-3p | SCO1     | 6341   | ENSG00000133028 | validated |
| tarbase | hsa-miR-106b-5p | MPRIP    | 23164  | ENSG00000133030 | validated |
| tarbase | hsa-miR-106b-5p | PIK3C2B  | 5287   | ENSG00000133056 | validated |
| tarbase | hsa-miR-144-3p  | DSTYK    | 25778  | ENSG00000133059 | validated |
| tarbase | hsa-miR-212-3p  | CHIT1    | 1118   | ENSG00000133063 | validated |
| tarbase | hsa-miR-106b-5p | SLC41A1  | 254428 | ENSG00000133065 | validated |
| tarbase | hsa-miR-18a-5p  | SLC41A1  | 254428 | ENSG00000133065 | validated |
| tarbase | hsa-miR-301a-3p | SLC41A1  | 254428 | ENSG00000133065 | validated |
| tarbase | hsa-miR-15b-5p  | DCLK1    | 9201   | ENSG00000133083 | validated |
| tarbase | hsa-miR-106b-5p | SPART    | 23111  | ENSG00000133104 | validated |
| tarbase | hsa-miR-192-5p  | SPART    | 23111  | ENSG00000133104 | validated |
| tarbase | hsa-miR-21-5p   | SPART    | 23111  | ENSG00000133104 | validated |
| tarbase | hsa-miR-212-3p  | EPSTI1   | 94240  | ENSG00000133106 | validated |
| tarbase | hsa-miR-181a-5p | POSTN    | 10631  | ENSG00000133110 | validated |
| tarbase | hsa-miR-21-5p   | TPT1     | 7178   | ENSG00000133112 | validated |
| tarbase | hsa-miR-582-5p  | GPALPP1  | 55425  | ENSG00000133114 | validated |
| tarbase | hsa-miR-106b-5p | RFC3     | 5983   | ENSG00000133119 | validated |
| tarbase | hsa-miR-181a-5p | RFC3     | 5983   | ENSG00000133119 | validated |
| tarbase | hsa-miR-15b-5p  | STARD13  | 90627  | ENSG00000133121 | validated |
| tarbase | hsa-miR-15b-5p  | IRS4     | 8471   | ENSG00000133124 | validated |
| tarbase | hsa-miR-192-5p  | IRS4     | 8471   | ENSG00000133124 | validated |
| tarbase | hsa-miR-326     | IRS4     | 8471   | ENSG00000133124 | validated |
| tarbase | hsa-miR-106b-5p | RNF128   | 79589  | ENSG00000133135 | validated |
| tarbase | hsa-miR-18a-5p  | BEX1     | 55859  | ENSG00000133169 | validated |
| tarbase | hsa-miR-301a-3p | FAM104A  | 84923  | ENSG00000133193 | validated |
| tarbase | hsa-miR-15b-5p  | SRRM1    | 10250  | ENSG00000133226 | validated |
| tarbase | hsa-miR-301a-3p | SLF1     | 84250  | ENSG00000133302 | validated |
| tarbase | hsa-miR-21-5p   | CNDP2    | 55748  | ENSG00000133313 | validated |

|         |                 |         |        |                 |           |
|---------|-----------------|---------|--------|-----------------|-----------|
| tarbase | hsa-miR-301a-3p | WDR74   | 54663  | ENSG00000133316 | validated |
| tarbase | hsa-miR-18a-5p  | WDR74   | 54663  | ENSG00000133316 | validated |
| tarbase | hsa-miR-15b-5p  | RTN3    | 10313  | ENSG00000133318 | validated |
| tarbase | hsa-miR-212-3p  | PLAAT4  | 5920   | ENSG00000133321 | validated |
| tarbase | hsa-miR-21-5p   | MYH11   | 4629   | ENSG00000133392 | validated |
| tarbase | hsa-miR-181a-5p | MED10   | 84246  | ENSG00000133398 | validated |
| tarbase | hsa-miR-15b-5p  | PDZD2   | 23037  | ENSG00000133401 | validated |
| tarbase | hsa-miR-181a-5p | LARGE1  | 9215   | ENSG00000133424 | validated |
| tarbase | hsa-miR-21-5p   | FAM83F  | 113828 | ENSG00000133477 | validated |
| tarbase | hsa-miR-212-3p  | FAM83F  | 113828 | ENSG00000133477 | validated |
| tarbase | hsa-miR-18a-5p  | MKRN1   | 23608  | ENSG00000133606 | validated |
| tarbase | hsa-miR-21-5p   | MKRN1   | 23608  | ENSG00000133606 | validated |
| tarbase | hsa-miR-296-5p  | AGAP3   | 116988 | ENSG00000133612 | validated |
| tarbase | hsa-miR-15b-5p  | AGAP3   | 116988 | ENSG00000133612 | validated |
| tarbase | hsa-miR-582-5p  | ACTR3B  | 57180  | ENSG00000133627 | validated |
| tarbase | hsa-miR-212-3p  | ACTR3B  | 57180  | ENSG00000133627 | validated |
| tarbase | hsa-miR-106b-5p | BTG1    | 694    | ENSG00000133639 | validated |
| tarbase | hsa-miR-181a-5p | BTG1    | 694    | ENSG00000133639 | validated |
| tarbase | hsa-miR-106b-5p | ATP13A3 | 79572  | ENSG00000133657 | validated |
| tarbase | hsa-miR-18a-5p  | ATP13A3 | 79572  | ENSG00000133657 | validated |
| tarbase | hsa-miR-212-3p  | ATP13A3 | 79572  | ENSG00000133657 | validated |
| tarbase | hsa-miR-296-5p  | ATP13A3 | 79572  | ENSG00000133657 | validated |
| tarbase | hsa-miR-301a-3p | ATP13A3 | 79572  | ENSG00000133657 | validated |
| tarbase | hsa-miR-106b-5p | IPO8    | 10526  | ENSG00000133704 | validated |
| tarbase | hsa-miR-15b-5p  | IPO8    | 10526  | ENSG00000133704 | validated |
| tarbase | hsa-miR-301a-3p | IPO8    | 10526  | ENSG00000133704 | validated |
| tarbase | hsa-miR-582-3p  | IPO8    | 10526  | ENSG00000133704 | validated |
| tarbase | hsa-miR-181a-5p | LARS1   | 51520  | ENSG00000133706 | validated |
| tarbase | hsa-miR-106b-5p | IMPA1   | 3612   | ENSG00000133731 | validated |
| tarbase | hsa-miR-15b-5p  | E2F5    | 1875   | ENSG00000133740 | validated |
| tarbase | hsa-miR-212-3p  | E2F5    | 1875   | ENSG00000133740 | validated |
| tarbase | hsa-miR-505-3p  | E2F5    | 1875   | ENSG00000133740 | validated |
| tarbase | hsa-miR-15b-5p  | CCDC59  | 29080  | ENSG00000133773 | validated |
| tarbase | hsa-miR-181a-5p | SWAP70  | 23075  | ENSG00000133789 | validated |
| tarbase | hsa-miR-212-3p  | ARNTL   | 406    | ENSG00000133794 | validated |
| tarbase | hsa-miR-15b-5p  | SBF2    | 81846  | ENSG00000133812 | validated |
| tarbase | hsa-miR-301a-3p | SBF2    | 81846  | ENSG00000133812 | validated |
| tarbase | hsa-miR-326     | SBF2    | 81846  | ENSG00000133812 | validated |
| tarbase | hsa-miR-212-3p  | SBF2    | 81846  | ENSG00000133812 | validated |
| tarbase | hsa-miR-15b-5p  | RRAS2   | 22800  | ENSG00000133818 | validated |
| tarbase | hsa-miR-15b-5p  | HSD17B4 | 3295   | ENSG00000133835 | validated |
| tarbase | hsa-miR-21-5p   | ZFC3H1  | 196441 | ENSG00000133858 | validated |
| tarbase | hsa-miR-301a-3p | ZFC3H1  | 196441 | ENSG00000133858 | validated |
| tarbase | hsa-miR-21-5p   | SARAF   | 51669  | ENSG00000133872 | validated |
| tarbase | hsa-miR-296-5p  | SARAF   | 51669  | ENSG00000133872 | validated |
| tarbase | hsa-miR-192-5p  | ERG28   | 11161  | ENSG00000133935 | validated |
| tarbase | hsa-miR-15b-5p  | NUMB    | 8650   | ENSG00000133961 | validated |
| tarbase | hsa-miR-181a-5p | NUMB    | 8650   | ENSG00000133961 | validated |
| tarbase | hsa-miR-15b-5p  | VRTN    | 55237  | ENSG00000133980 | validated |
| tarbase | hsa-miR-192-5p  | COX16   | 51241  | ENSG00000133983 | validated |
| tarbase | hsa-miR-18a-5p  | MED6    | 10001  | ENSG00000133997 | validated |
| tarbase | hsa-miR-582-5p  | MED6    | 10001  | ENSG00000133997 | validated |
| tarbase | hsa-miR-181a-5p | EIF2S1  | 1965   | ENSG00000134001 | validated |
| tarbase | hsa-miR-212-3p  | PEBP4   | 157310 | ENSG00000134020 | validated |
| tarbase | hsa-miR-106b-5p | MBD2    | 8932   | ENSG00000134046 | validated |
| tarbase | hsa-miR-18a-5p  | MBD2    | 8932   | ENSG00000134046 | validated |
| tarbase | hsa-miR-301a-3p | MBD2    | 8932   | ENSG00000134046 | validated |
| tarbase | hsa-miR-106b-5p | CCNB1   | 891    | ENSG00000134057 | validated |
| tarbase | hsa-miR-181a-5p | CCNB1   | 891    | ENSG00000134057 | validated |
| tarbase | hsa-miR-18a-5p  | CCNB1   | 891    | ENSG00000134057 | validated |
| tarbase | hsa-miR-301a-3p | CCNB1   | 891    | ENSG00000134057 | validated |
| tarbase | hsa-miR-582-3p  | CCNB1   | 891    | ENSG00000134057 | validated |
| tarbase | hsa-miR-192-5p  | THUMPD3 | 25917  | ENSG00000134077 | validated |
| tarbase | hsa-miR-582-5p  | THUMPD3 | 25917  | ENSG00000134077 | validated |
| tarbase | hsa-miR-106b-5p | VHL     | 7428   | ENSG00000134086 | validated |
| tarbase | hsa-miR-15b-5p  | VHL     | 7428   | ENSG00000134086 | validated |
| tarbase | hsa-miR-301a-3p | VHL     | 7428   | ENSG00000134086 | validated |
| tarbase | hsa-miR-181a-5p | BHLHE40 | 8553   | ENSG00000134107 | validated |
| tarbase | hsa-miR-144-3p  | ARL8B   | 55207  | ENSG00000134108 | validated |
| tarbase | hsa-miR-15b-5p  | ARL8B   | 55207  | ENSG00000134108 | validated |
| tarbase | hsa-miR-181a-5p | ARL8B   | 55207  | ENSG00000134108 | validated |

|         |                 |           |        |                 |           |
|---------|-----------------|-----------|--------|-----------------|-----------|
| tarbase | hsa-miR-301a-3p | ARL8B     | 55207  | ENSG00000134108 | validated |
| tarbase | hsa-miR-106b-5p | ARL8B     | 55207  | ENSG00000134108 | validated |
| tarbase | hsa-miR-144-3p  | EDEM1     | 9695   | ENSG00000134109 | validated |
| tarbase | hsa-miR-15b-5p  | CHL1      | 10752  | ENSG00000134121 | validated |
| tarbase | hsa-miR-15b-5p  | KATNBL1   | 79768  | ENSG00000134152 | validated |
| tarbase | hsa-miR-181a-5p | KATNBL1   | 79768  | ENSG00000134152 | validated |
| tarbase | hsa-miR-15b-5p  | EMC7      | 56851  | ENSG00000134153 | validated |
| tarbase | hsa-miR-21-5p   | TSPAN2    | 10100  | ENSG00000134198 | validated |
| tarbase | hsa-miR-212-3p  | VAV3      | 10451  | ENSG00000134215 | validated |
| tarbase | hsa-miR-21-5p   | PSRC1     | 84722  | ENSG00000134222 | validated |
| tarbase | hsa-miR-181a-5p | PTGFRN    | 5738   | ENSG00000134247 | validated |
| tarbase | hsa-miR-18a-5p  | PTGFRN    | 5738   | ENSG00000134247 | validated |
| tarbase | hsa-miR-301a-3p | PTGFRN    | 5738   | ENSG00000134247 | validated |
| tarbase | hsa-miR-106b-5p | LAMTOR5   | 10542  | ENSG00000134248 | validated |
| tarbase | hsa-miR-21-5p   | LAMTOR5   | 10542  | ENSG00000134248 | validated |
| tarbase | hsa-miR-106b-5p | NOTCH2    | 4853   | ENSG00000134250 | validated |
| tarbase | hsa-miR-18a-5p  | NOTCH2    | 4853   | ENSG00000134250 | validated |
| tarbase | hsa-miR-192-5p  | NOTCH2    | 4853   | ENSG00000134250 | validated |
| tarbase | hsa-miR-222-3p  | NOTCH2    | 4853   | ENSG00000134250 | validated |
| tarbase | hsa-miR-505-3p  | NOTCH2    | 4853   | ENSG00000134250 | validated |
| tarbase | hsa-miR-15b-5p  | VTCN1     | 79679  | ENSG00000134258 | validated |
| tarbase | hsa-miR-212-3p  | NAPG      | 8774   | ENSG00000134265 | validated |
| tarbase | hsa-miR-106b-5p | NAPG      | 8774   | ENSG00000134265 | validated |
| tarbase | hsa-miR-301a-3p | PPHLN1    | 51535  | ENSG00000134283 | validated |
| tarbase | hsa-miR-144-3p  | ARF3      | 377    | ENSG00000134287 | validated |
| tarbase | hsa-miR-15b-5p  | ARF3      | 377    | ENSG00000134287 | validated |
| tarbase | hsa-miR-181a-5p | ARF3      | 377    | ENSG00000134287 | validated |
| tarbase | hsa-miR-192-5p  | ARF3      | 377    | ENSG00000134287 | validated |
| tarbase | hsa-miR-296-5p  | ARF3      | 377    | ENSG00000134287 | validated |
| tarbase | hsa-miR-106b-5p | SLC38A2   | 54407  | ENSG00000134294 | validated |
| tarbase | hsa-miR-144-3p  | SLC38A2   | 54407  | ENSG00000134294 | validated |
| tarbase | hsa-miR-21-5p   | SLC38A2   | 54407  | ENSG00000134294 | validated |
| tarbase | hsa-miR-582-3p  | SLC38A2   | 54407  | ENSG00000134294 | validated |
| tarbase | hsa-miR-212-3p  | KIDINS220 | 57498  | ENSG00000134313 | validated |
| tarbase | hsa-miR-106b-5p | ROCK2     | 9475   | ENSG00000134318 | validated |
| tarbase | hsa-miR-21-5p   | ROCK2     | 9475   | ENSG00000134318 | validated |
| tarbase | hsa-miR-301a-3p | ROCK2     | 9475   | ENSG00000134318 | validated |
| tarbase | hsa-miR-212-3p  | RSAD2     | 91543  | ENSG00000134321 | validated |
| tarbase | hsa-miR-21-5p   | LPIN1     | 23175  | ENSG00000134324 | validated |
| tarbase | hsa-miR-301a-3p | LPIN1     | 23175  | ENSG00000134324 | validated |
| tarbase | hsa-miR-106b-5p | LPIN1     | 23175  | ENSG00000134324 | validated |
| tarbase | hsa-miR-212-3p  | CMPK2     | 129607 | ENSG00000134326 | validated |
| tarbase | hsa-miR-21-5p   | LDHA      | 3939   | ENSG00000134333 | validated |
| tarbase | hsa-miR-222-3p  | LDHA      | 3939   | ENSG00000134333 | validated |
| tarbase | hsa-miR-301a-3p | LDHA      | 3939   | ENSG00000134333 | validated |
| tarbase | hsa-miR-106b-5p | IL6ST     | 3572   | ENSG00000134352 | validated |
| tarbase | hsa-miR-15b-5p  | IL6ST     | 3572   | ENSG00000134352 | validated |
| tarbase | hsa-miR-21-5p   | IL6ST     | 3572   | ENSG00000134352 | validated |
| tarbase | hsa-miR-301a-3p | IL6ST     | 3572   | ENSG00000134352 | validated |
| tarbase | hsa-miR-181a-5p | IL6ST     | 3572   | ENSG00000134352 | validated |
| tarbase | hsa-miR-505-3p  | IL6ST     | 3572   | ENSG00000134352 | validated |
| tarbase | hsa-miR-15b-5p  | NAV1      | 89796  | ENSG00000134369 | validated |
| tarbase | hsa-miR-296-5p  | NAV1      | 89796  | ENSG00000134369 | validated |
| tarbase | hsa-miR-106b-5p | CDC73     | 79577  | ENSG00000134371 | validated |
| tarbase | hsa-miR-15b-5p  | CDC73     | 79577  | ENSG00000134371 | validated |
| tarbase | hsa-miR-18a-5p  | CDC73     | 79577  | ENSG00000134371 | validated |
| tarbase | hsa-miR-21-5p   | CDC73     | 79577  | ENSG00000134371 | validated |
| tarbase | hsa-miR-181a-5p | CDC73     | 79577  | ENSG00000134371 | validated |
| tarbase | hsa-miR-18a-5p  | TIMM17A   | 10440  | ENSG00000134375 | validated |
| tarbase | hsa-miR-15b-5p  | NARS1     | 4677   | ENSG00000134440 | validated |
| tarbase | hsa-miR-15b-5p  | RELCH     | 57614  | ENSG00000134444 | validated |
| tarbase | hsa-miR-301a-3p | RELCH     | 57614  | ENSG00000134444 | validated |
| tarbase | hsa-miR-222-3p  | RBM17     | 84991  | ENSG00000134453 | validated |
| tarbase | hsa-miR-106b-5p | ANKRD16   | 54522  | ENSG00000134461 | validated |
| tarbase | hsa-miR-18a-5p  | CCNH      | 902    | ENSG00000134480 | validated |
| tarbase | hsa-miR-21-5p   | CCNH      | 902    | ENSG00000134480 | validated |
| tarbase | hsa-miR-181a-5p | TMEM241   | 85019  | ENSG00000134490 | validated |
| tarbase | hsa-miR-18a-5p  | CABLES1   | 91768  | ENSG00000134508 | validated |
| tarbase | hsa-miR-21-5p   | DOCK2     | 1794   | ENSG00000134516 | validated |
| tarbase | hsa-miR-296-5p  | EMP1      | 2012   | ENSG00000134531 | validated |
| tarbase | hsa-miR-106b-5p | SOX5      | 6660   | ENSG00000134532 | validated |

|         |                 |          |        |                 |           |
|---------|-----------------|----------|--------|-----------------|-----------|
| tarbase | hsa-miR-15b-5p  | SOX5     | 6660   | ENSG00000134532 | validated |
| tarbase | hsa-miR-15b-5p  | ACP2     | 53     | ENSG00000134575 | validated |
| tarbase | hsa-miR-212-3p  | RAB33A   | 9363   | ENSG00000134594 | validated |
| tarbase | hsa-miR-192-5p  | STK26    | 51765  | ENSG00000134602 | validated |
| tarbase | hsa-miR-212-3p  | PIWIL4   | 143689 | ENSG00000134627 | validated |
| tarbase | hsa-miR-144-3p  | PUM1     | 9698   | ENSG00000134644 | validated |
| tarbase | hsa-miR-15b-5p  | PUM1     | 9698   | ENSG00000134644 | validated |
| tarbase | hsa-miR-18a-5p  | PUM1     | 9698   | ENSG00000134644 | validated |
| tarbase | hsa-miR-212-3p  | PUM1     | 9698   | ENSG00000134644 | validated |
| tarbase | hsa-miR-582-5p  | PUM1     | 9698   | ENSG00000134644 | validated |
| tarbase | hsa-miR-181a-5p | YARS1    | 8565   | ENSG00000134684 | validated |
| tarbase | hsa-miR-18a-5p  | YARS1    | 8565   | ENSG00000134684 | validated |
| tarbase | hsa-miR-326     | YARS1    | 8565   | ENSG00000134684 | validated |
| tarbase | hsa-miR-18a-5p  | PHC2     | 1912   | ENSG00000134686 | validated |
| tarbase | hsa-miR-222-3p  | PHC2     | 1912   | ENSG00000134686 | validated |
| tarbase | hsa-miR-181a-5p | AGO4     | 192670 | ENSG00000134698 | validated |
| tarbase | hsa-miR-181a-5p | HOOK1    | 51361  | ENSG00000134709 | validated |
| tarbase | hsa-miR-18a-5p  | BTF3L4   | 91408  | ENSG00000134717 | validated |
| tarbase | hsa-miR-21-5p   | BTF3L4   | 91408  | ENSG00000134717 | validated |
| tarbase | hsa-miR-15b-5p  | TUT4     | 23318  | ENSG00000134744 | validated |
| tarbase | hsa-miR-212-3p  | DSC2     | 1824   | ENSG00000134755 | validated |
| tarbase | hsa-miR-21-5p   | DSC2     | 1824   | ENSG00000134755 | validated |
| tarbase | hsa-miR-301a-3p | DSC2     | 1824   | ENSG00000134755 | validated |
| tarbase | hsa-miR-106b-5p | RNF138   | 51444  | ENSG00000134758 | validated |
| tarbase | hsa-miR-181a-5p | DSC3     | 1825   | ENSG00000134762 | validated |
| tarbase | hsa-miR-15b-5p  | DTNA     | 1837   | ENSG00000134769 | validated |
| tarbase | hsa-miR-18a-5p  | TPGS2    | 25941  | ENSG00000134779 | validated |
| tarbase | hsa-miR-15b-5p  | FADS2    | 9415   | ENSG00000134824 | validated |
| tarbase | hsa-miR-15b-5p  | TMEM258  | 746    | ENSG00000134825 | validated |
| tarbase | hsa-miR-505-3p  | CLOCK    | 9575   | ENSG00000134852 | validated |
| tarbase | hsa-miR-106b-5p | COL4A2   | 1284   | ENSG00000134871 | validated |
| tarbase | hsa-miR-15b-5p  | DZIP1    | 22873  | ENSG00000134874 | validated |
| tarbase | hsa-miR-21-5p   | ARHGAP32 | 9743   | ENSG00000134909 | validated |
| tarbase | hsa-miR-15b-5p  | STT3A    | 3703   | ENSG00000134910 | validated |
| tarbase | hsa-miR-181a-5p | STT3A    | 3703   | ENSG00000134910 | validated |
| tarbase | hsa-miR-212-3p  | ETS1     | 2113   | ENSG00000134954 | validated |
| tarbase | hsa-miR-15b-5p  | TMED7    | 51014  | ENSG00000134970 | validated |
| tarbase | hsa-miR-18a-5p  | TMED7    | 51014  | ENSG00000134970 | validated |
| tarbase | hsa-miR-192-5p  | TMED7    | 51014  | ENSG00000134970 | validated |
| tarbase | hsa-miR-301a-3p | TMED7    | 51014  | ENSG00000134970 | validated |
| tarbase | hsa-miR-181a-5p | TMED7    | 51014  | ENSG00000134970 | validated |
| tarbase | hsa-miR-181a-5p | APC      | 324    | ENSG00000134982 | validated |
| tarbase | hsa-miR-15b-5p  | APC      | 324    | ENSG00000134982 | validated |
| tarbase | hsa-miR-301a-3p | NREP     | 9315   | ENSG00000134986 | validated |
| tarbase | hsa-miR-326     | NREP     | 9315   | ENSG00000134986 | validated |
| tarbase | hsa-miR-106b-5p | WDR36    | 134430 | ENSG00000134987 | validated |
| tarbase | hsa-miR-301a-3p | WDR36    | 134430 | ENSG00000134987 | validated |
| tarbase | hsa-miR-181a-5p | RFK      | 55312  | ENSG00000135002 | validated |
| tarbase | hsa-miR-106b-5p | UBQLN1   | 29979  | ENSG00000135018 | validated |
| tarbase | hsa-miR-212-3p  | UBQLN1   | 29979  | ENSG00000135018 | validated |
| tarbase | hsa-miR-582-5p  | UBQLN1   | 29979  | ENSG00000135018 | validated |
| tarbase | hsa-miR-21-5p   | ANXA1    | 301    | ENSG00000135046 | validated |
| tarbase | hsa-miR-222-3p  | ANXA1    | 301    | ENSG00000135046 | validated |
| tarbase | hsa-miR-15b-5p  | CTSL     | 1514   | ENSG00000135047 | validated |
| tarbase | hsa-miR-15b-5p  | CEMIP2   | 23670  | ENSG00000135048 | validated |
| tarbase | hsa-miR-106b-5p | PSAT1    | 29968  | ENSG00000135069 | validated |
| tarbase | hsa-miR-181a-5p | ISCA1    | 81689  | ENSG00000135070 | validated |
| tarbase | hsa-miR-106b-5p | TAOK3    | 51347  | ENSG00000135090 | validated |
| tarbase | hsa-miR-106b-5p | USP30    | 84749  | ENSG00000135093 | validated |
| tarbase | hsa-miR-15b-5p  | FBXO21   | 23014  | ENSG00000135108 | validated |
| tarbase | hsa-miR-181a-5p | FBXO21   | 23014  | ENSG00000135108 | validated |
| tarbase | hsa-miR-212-3p  | FBXO21   | 23014  | ENSG00000135108 | validated |
| tarbase | hsa-miR-301a-3p | FBXO21   | 23014  | ENSG00000135108 | validated |
| tarbase | hsa-miR-582-3p  | FBXO21   | 23014  | ENSG00000135108 | validated |
| tarbase | hsa-miR-212-3p  | TBX3     | 6926   | ENSG00000135111 | validated |
| tarbase | hsa-miR-212-3p  | OASL     | 8638   | ENSG00000135114 | validated |
| tarbase | hsa-miR-21-5p   | HRK      | 8739   | ENSG00000135116 | validated |
| tarbase | hsa-miR-301a-3p | HRK      | 8739   | ENSG00000135116 | validated |
| tarbase | hsa-miR-106b-5p | P2RX4    | 5025   | ENSG00000135124 | validated |
| tarbase | hsa-miR-222-3p  | P2RX4    | 5025   | ENSG00000135124 | validated |
| tarbase | hsa-miR-582-3p  | TRAFD1   | 10906  | ENSG00000135148 | validated |

|         |                 |           |        |                 |           |
|---------|-----------------|-----------|--------|-----------------|-----------|
| tarbase | hsa-miR-106b-5p | DMTF1     | 9988   | ENSG00000135164 | validated |
| tarbase | hsa-miR-21-5p   | TMEM243   | 79161  | ENSG00000135185 | validated |
| tarbase | hsa-miR-212-3p  | CCDC146   | 57639  | ENSG00000135205 | validated |
| tarbase | hsa-miR-181a-5p | HILPDA    | 29923  | ENSG00000135245 | validated |
| tarbase | hsa-miR-106b-5p | TES       | 26136  | ENSG00000135269 | validated |
| tarbase | hsa-miR-181a-5p | TES       | 26136  | ENSG00000135269 | validated |
| tarbase | hsa-miR-301a-3p | TES       | 26136  | ENSG00000135269 | validated |
| tarbase | hsa-miR-18a-5p  | TES       | 26136  | ENSG00000135269 | validated |
| tarbase | hsa-miR-301a-3p | MDFIC     | 29969  | ENSG00000135272 | validated |
| tarbase | hsa-miR-15b-5p  | KHDC1     | 80759  | ENSG00000135314 | validated |
| tarbase | hsa-miR-192-5p  | CEP162    | 22832  | ENSG00000135315 | validated |
| tarbase | hsa-miR-106b-5p | SYNCRIP   | 10492  | ENSG00000135316 | validated |
| tarbase | hsa-miR-212-3p  | SYNCRIP   | 10492  | ENSG00000135316 | validated |
| tarbase | hsa-miR-301a-3p | SYNCRIP   | 10492  | ENSG00000135316 | validated |
| tarbase | hsa-miR-582-5p  | SYNCRIP   | 10492  | ENSG00000135316 | validated |
| tarbase | hsa-miR-181a-5p | SYNCRIP   | 10492  | ENSG00000135316 | validated |
| tarbase | hsa-miR-181a-5p | SNX14     | 57231  | ENSG00000135317 | validated |
| tarbase | hsa-miR-21-5p   | NT5E      | 4907   | ENSG00000135318 | validated |
| tarbase | hsa-miR-106b-5p | EPHA7     | 2045   | ENSG00000135333 | validated |
| tarbase | hsa-miR-18a-5p  | EPHA7     | 2045   | ENSG00000135333 | validated |
| tarbase | hsa-miR-212-3p  | EPHA7     | 2045   | ENSG00000135333 | validated |
| tarbase | hsa-miR-301a-3p | EPHA7     | 2045   | ENSG00000135333 | validated |
| tarbase | hsa-miR-181a-5p | AKIRIN2   | 55122  | ENSG00000135334 | validated |
| tarbase | hsa-miR-582-3p  | AKIRIN2   | 55122  | ENSG00000135334 | validated |
| tarbase | hsa-miR-582-5p  | AKIRIN2   | 55122  | ENSG00000135334 | validated |
| tarbase | hsa-miR-505-3p  | LCA5      | 167691 | ENSG00000135338 | validated |
| tarbase | hsa-miR-212-3p  | LCA5      | 167691 | ENSG00000135338 | validated |
| tarbase | hsa-miR-181a-5p | MAP3K7    | 6885   | ENSG00000135341 | validated |
| tarbase | hsa-miR-212-3p  | CGA       | 1081   | ENSG00000135346 | validated |
| tarbase | hsa-miR-181a-5p | PRR5L     | 79899  | ENSG00000135362 | validated |
| tarbase | hsa-miR-181a-5p | LMO2      | 4005   | ENSG00000135363 | validated |
| tarbase | hsa-miR-212-3p  | LMO2      | 4005   | ENSG00000135363 | validated |
| tarbase | hsa-miR-181a-5p | PRRG4     | 79056  | ENSG00000135378 | validated |
| tarbase | hsa-miR-15b-5p  | CAPRIN1   | 4076   | ENSG00000135387 | validated |
| tarbase | hsa-miR-212-3p  | CAPRIN1   | 4076   | ENSG00000135387 | validated |
| tarbase | hsa-miR-301a-3p | CAPRIN1   | 4076   | ENSG00000135387 | validated |
| tarbase | hsa-miR-181a-5p | CAPRIN1   | 4076   | ENSG00000135387 | validated |
| tarbase | hsa-miR-18a-5p  | GDF11     | 10220  | ENSG00000135414 | validated |
| tarbase | hsa-miR-212-3p  | RDH5      | 5959   | ENSG00000135437 | validated |
| tarbase | hsa-miR-18a-5p  | CDK4      | 1019   | ENSG00000135446 | validated |
| tarbase | hsa-miR-296-5p  | CDK4      | 1019   | ENSG00000135446 | validated |
| tarbase | hsa-miR-301a-3p | TROAP     | 10024  | ENSG00000135451 | validated |
| tarbase | hsa-miR-21-5p   | TSPAN31   | 6302   | ENSG00000135452 | validated |
| tarbase | hsa-miR-15b-5p  | TFCP2     | 7024   | ENSG00000135457 | validated |
| tarbase | hsa-miR-505-3p  | HNRNPA1   | 3178   | ENSG00000135486 | validated |
| tarbase | hsa-miR-15b-5p  | ACVR1B    | 91     | ENSG00000135503 | validated |
| tarbase | hsa-miR-296-5p  | ACVR1B    | 91     | ENSG00000135503 | validated |
| tarbase | hsa-miR-326     | ACVR1B    | 91     | ENSG00000135503 | validated |
| tarbase | hsa-miR-582-5p  | ACVR1B    | 91     | ENSG00000135503 | validated |
| tarbase | hsa-miR-106b-5p | LTV1      | 84946  | ENSG00000135521 | validated |
| tarbase | hsa-miR-21-5p   | LTV1      | 84946  | ENSG00000135521 | validated |
| tarbase | hsa-miR-15b-5p  | MAP7      | 9053   | ENSG00000135525 | validated |
| tarbase | hsa-miR-181a-5p | MAP7      | 9053   | ENSG00000135525 | validated |
| tarbase | hsa-miR-21-5p   | MAP7      | 9053   | ENSG00000135525 | validated |
| tarbase | hsa-miR-106b-5p | CD164     | 8763   | ENSG00000135535 | validated |
| tarbase | hsa-miR-15b-5p  | CD164     | 8763   | ENSG00000135535 | validated |
| tarbase | hsa-miR-181a-5p | CD164     | 8763   | ENSG00000135535 | validated |
| tarbase | hsa-miR-18a-5p  | CD164     | 8763   | ENSG00000135535 | validated |
| tarbase | hsa-miR-212-3p  | CD164     | 8763   | ENSG00000135535 | validated |
| tarbase | hsa-miR-21-5p   | CD164     | 8763   | ENSG00000135535 | validated |
| tarbase | hsa-miR-222-3p  | CD164     | 8763   | ENSG00000135535 | validated |
| tarbase | hsa-miR-18a-5p  | NHSL1     | 57224  | ENSG00000135540 | validated |
| tarbase | hsa-miR-15b-5p  | REPS1     | 85021  | ENSG00000135597 | validated |
| tarbase | hsa-miR-296-5p  | PRADC1    | 84279  | ENSG00000135617 | validated |
| tarbase | hsa-miR-181a-5p | CCT7      | 10574  | ENSG00000135624 | validated |
| tarbase | hsa-miR-18a-5p  | CCT7      | 10574  | ENSG00000135624 | validated |
| tarbase | hsa-miR-15b-5p  | RAB11FIP5 | 26056  | ENSG00000135631 | validated |
| tarbase | hsa-miR-106b-5p | SMYD5     | 10322  | ENSG00000135632 | validated |
| tarbase | hsa-miR-15b-5p  | SMYD5     | 10322  | ENSG00000135632 | validated |
| tarbase | hsa-miR-106b-5p | USP15     | 9958   | ENSG00000135655 | validated |
| tarbase | hsa-miR-21-5p   | USP15     | 9958   | ENSG00000135655 | validated |

|         |                 |          |        |                 |           |
|---------|-----------------|----------|--------|-----------------|-----------|
| tarbase | hsa-miR-582-3p  | USP15    | 9958   | ENSG00000135655 | validated |
| tarbase | hsa-miR-15b-5p  | GNS      | 2799   | ENSG00000135677 | validated |
| tarbase | hsa-miR-222-3p  | GNS      | 2799   | ENSG00000135677 | validated |
| tarbase | hsa-miR-301a-3p | GNS      | 2799   | ENSG00000135677 | validated |
| tarbase | hsa-miR-15b-5p  | MDM2     | 4193   | ENSG00000135679 | validated |
| tarbase | hsa-miR-18a-5p  | MDM2     | 4193   | ENSG00000135679 | validated |
| tarbase | hsa-miR-192-5p  | MDM2     | 4193   | ENSG00000135679 | validated |
| tarbase | hsa-miR-212-3p  | MDM2     | 4193   | ENSG00000135679 | validated |
| tarbase | hsa-miR-21-5p   | MDM2     | 4193   | ENSG00000135679 | validated |
| tarbase | hsa-miR-505-3p  | MDM2     | 4193   | ENSG00000135679 | validated |
| tarbase | hsa-miR-582-5p  | MDM2     | 4193   | ENSG00000135679 | validated |
| tarbase | hsa-miR-181a-5p | MPHOSPH6 | 10200  | ENSG00000135698 | validated |
| tarbase | hsa-miR-296-5p  | DYNC1LI2 | 1783   | ENSG00000135720 | validated |
| tarbase | hsa-miR-15b-5p  | DYNC1LI2 | 1783   | ENSG00000135720 | validated |
| tarbase | hsa-miR-15b-5p  | AGT      | 183    | ENSG00000135744 | validated |
| tarbase | hsa-miR-192-5p  | PCNX2    | 80003  | ENSG00000135749 | validated |
| tarbase | hsa-miR-106b-5p | KCNK1    | 3775   | ENSG00000135750 | validated |
| tarbase | hsa-miR-144-3p  | URB2     | 9816   | ENSG00000135763 | validated |
| tarbase | hsa-miR-222-3p  | URB2     | 9816   | ENSG00000135763 | validated |
| tarbase | hsa-miR-15b-5p  | EGLN1    | 54583  | ENSG00000135766 | validated |
| tarbase | hsa-miR-181a-5p | EGLN1    | 54583  | ENSG00000135766 | validated |
| tarbase | hsa-miR-106b-5p | CAPN9    | 10753  | ENSG00000135773 | validated |
| tarbase | hsa-miR-18a-5p  | TAF5L    | 27097  | ENSG00000135801 | validated |
| tarbase | hsa-miR-301a-3p | TAF5L    | 27097  | ENSG00000135801 | validated |
| tarbase | hsa-miR-582-3p  | GLUL     | 2752   | ENSG00000135821 | validated |
| tarbase | hsa-miR-18a-5p  | STX6     | 10228  | ENSG00000135823 | validated |
| tarbase | hsa-miR-106b-5p | RNASEL   | 6041   | ENSG00000135828 | validated |
| tarbase | hsa-miR-21-5p   | RNASEL   | 6041   | ENSG00000135828 | validated |
| tarbase | hsa-miR-15b-5p  | DHX9     | 1660   | ENSG00000135829 | validated |
| tarbase | hsa-miR-326     | DHX9     | 1660   | ENSG00000135829 | validated |
| tarbase | hsa-miR-144-3p  | CEP350   | 9857   | ENSG00000135837 | validated |
| tarbase | hsa-miR-181a-5p | CEP350   | 9857   | ENSG00000135837 | validated |
| tarbase | hsa-miR-582-5p  | CEP350   | 9857   | ENSG00000135837 | validated |
| tarbase | hsa-miR-301a-3p | NIBAN1   | 116496 | ENSG00000135842 | validated |
| tarbase | hsa-miR-212-3p  | NIBAN1   | 116496 | ENSG00000135842 | validated |
| tarbase | hsa-miR-181a-5p | LAMC1    | 3915   | ENSG00000135862 | validated |
| tarbase | hsa-miR-21-5p   | LAMC1    | 3915   | ENSG00000135862 | validated |
| tarbase | hsa-miR-106b-5p | RC3H1    | 149041 | ENSG00000135870 | validated |
| tarbase | hsa-miR-181a-5p | RC3H1    | 149041 | ENSG00000135870 | validated |
| tarbase | hsa-miR-18a-5p  | RC3H1    | 149041 | ENSG00000135870 | validated |
| tarbase | hsa-miR-212-3p  | SP110    | 3431   | ENSG00000135899 | validated |
| tarbase | hsa-miR-15b-5p  | MRPL44   | 65080  | ENSG00000135900 | validated |
| tarbase | hsa-miR-181a-5p | DOCK10   | 55619  | ENSG00000135905 | validated |
| tarbase | hsa-miR-106b-5p | USP37    | 57695  | ENSG00000135913 | validated |
| tarbase | hsa-miR-18a-5p  | USP37    | 57695  | ENSG00000135913 | validated |
| tarbase | hsa-miR-106b-5p | ITM2C    | 81618  | ENSG00000135916 | validated |
| tarbase | hsa-miR-15b-5p  | ITM2C    | 81618  | ENSG00000135916 | validated |
| tarbase | hsa-miR-296-5p  | ITM2C    | 81618  | ENSG00000135916 | validated |
| tarbase | hsa-miR-181a-5p | ITM2C    | 81618  | ENSG00000135916 | validated |
| tarbase | hsa-miR-106b-5p | SERPINE2 | 5270   | ENSG00000135919 | validated |
| tarbase | hsa-miR-18a-5p  | TMBIM1   | 64114  | ENSG00000135926 | validated |
| tarbase | hsa-miR-301a-3p | EIF4E2   | 9470   | ENSG00000135930 | validated |
| tarbase | hsa-miR-212-3p  | ARMC9    | 80210  | ENSG00000135931 | validated |
| tarbase | hsa-miR-15b-5p  | CAB39    | 51719  | ENSG00000135932 | validated |
| tarbase | hsa-miR-181a-5p | CAB39    | 51719  | ENSG00000135932 | validated |
| tarbase | hsa-miR-301a-3p | COX5B    | 1329   | ENSG00000135940 | validated |
| tarbase | hsa-miR-106b-5p | MFSD9    | 84804  | ENSG00000135953 | validated |
| tarbase | hsa-miR-15b-5p  | TMEM127  | 55654  | ENSG00000135956 | validated |
| tarbase | hsa-miR-181a-5p | TMEM127  | 55654  | ENSG00000135956 | validated |
| tarbase | hsa-miR-222-3p  | TMEM127  | 55654  | ENSG00000135956 | validated |
| tarbase | hsa-miR-582-3p  | TMEM127  | 55654  | ENSG00000135956 | validated |
| tarbase | hsa-miR-21-5p   | TGFBRAP1 | 9392   | ENSG00000135966 | validated |
| tarbase | hsa-miR-301a-3p | TGFBRAP1 | 9392   | ENSG00000135966 | validated |
| tarbase | hsa-miR-326     | MRPS9    | 64965  | ENSG00000135972 | validated |
| tarbase | hsa-miR-106b-5p | C2orf49  | 79074  | ENSG00000135974 | validated |
| tarbase | hsa-miR-181a-5p | EPC2     | 26122  | ENSG00000135999 | validated |
| tarbase | hsa-miR-301a-3p | EPC2     | 26122  | ENSG00000135999 | validated |
| tarbase | hsa-miR-15b-5p  | USP44    | 84101  | ENSG00000136014 | validated |
| tarbase | hsa-miR-212-3p  | USP44    | 84101  | ENSG00000136014 | validated |
| tarbase | hsa-miR-212-3p  | SCYL2    | 55681  | ENSG00000136021 | validated |
| tarbase | hsa-miR-106b-5p | CKAP4    | 10970  | ENSG00000136026 | validated |



|         |                 |          |       |                 |           |
|---------|-----------------|----------|-------|-----------------|-----------|
| tarbase | hsa-miR-21-5p   | PWP1     | 11137 | ENSG00000136045 | validated |
| tarbase | hsa-miR-15b-5p  | SLC41A2  | 84102 | ENSG00000136052 | validated |
| tarbase | hsa-miR-181a-5p | FLNB     | 2317  | ENSG00000136068 | validated |
| tarbase | hsa-miR-296-5p  | FLNB     | 2317  | ENSG00000136068 | validated |
| tarbase | hsa-miR-582-3p  | FLNB     | 2317  | ENSG00000136068 | validated |
| tarbase | hsa-miR-582-5p  | FLNB     | 2317  | ENSG00000136068 | validated |
| tarbase | hsa-miR-296-5p  | NEK3     | 4752  | ENSG00000136098 | validated |
| tarbase | hsa-miR-181a-5p | PCDH8    | 5100  | ENSG00000136099 | validated |
| tarbase | hsa-miR-15b-5p  | VPS36    | 51028 | ENSG00000136100 | validated |
| tarbase | hsa-miR-106b-5p | RNASEH2B | 79621 | ENSG00000136104 | validated |
| tarbase | hsa-miR-18a-5p  | CKAP2    | 26586 | ENSG00000136108 | validated |
| tarbase | hsa-miR-301a-3p | BORA     | 79866 | ENSG00000136122 | validated |
| tarbase | hsa-miR-106b-5p | LRCH1    | 23143 | ENSG00000136141 | validated |
| tarbase | hsa-miR-15b-5p  | SUCLA2   | 8803  | ENSG00000136143 | validated |
| tarbase | hsa-miR-15b-5p  | COG3     | 83548 | ENSG00000136152 | validated |
| tarbase | hsa-miR-181a-5p | COG3     | 83548 | ENSG00000136152 | validated |
| tarbase | hsa-miR-18a-5p  | COG3     | 83548 | ENSG00000136152 | validated |
| tarbase | hsa-miR-15b-5p  | LMO7     | 4008  | ENSG00000136153 | validated |
| tarbase | hsa-miR-301a-3p | ITM2B    | 9445  | ENSG00000136156 | validated |
| tarbase | hsa-miR-326     | ITM2B    | 9445  | ENSG00000136156 | validated |
| tarbase | hsa-miR-106b-5p | EDNRB    | 1910  | ENSG00000136160 | validated |
| tarbase | hsa-miR-181a-5p | LCP1     | 3936  | ENSG00000136167 | validated |
| tarbase | hsa-miR-15b-5p  | SCRN1    | 9805  | ENSG00000136193 | validated |
| tarbase | hsa-miR-212-3p  | SCRN1    | 9805  | ENSG00000136193 | validated |
| tarbase | hsa-miR-15b-5p  | TNS3     | 64759 | ENSG00000136205 | validated |
| tarbase | hsa-miR-181a-5p | IGF2BP3  | 10643 | ENSG00000136231 | validated |
| tarbase | hsa-miR-15b-5p  | RAC1     | 5879  | ENSG00000136238 | validated |
| tarbase | hsa-miR-505-3p  | RAC1     | 5879  | ENSG00000136238 | validated |
| tarbase | hsa-miR-15b-5p  | KDEL2    | 11014 | ENSG00000136240 | validated |
| tarbase | hsa-miR-181a-5p | KDEL2    | 11014 | ENSG00000136240 | validated |
| tarbase | hsa-miR-222-3p  | KDEL2    | 11014 | ENSG00000136240 | validated |
| tarbase | hsa-miR-106b-5p | NUP42    | 11097 | ENSG00000136243 | validated |
| tarbase | hsa-miR-192-5p  | IL6      | 3569  | ENSG00000136244 | validated |
| tarbase | hsa-miR-21-5p   | IL6      | 3569  | ENSG00000136244 | validated |
| tarbase | hsa-miR-144-3p  | ZDHHC4   | 55146 | ENSG00000136247 | validated |
| tarbase | hsa-miR-15b-5p  | ZDHHC4   | 55146 | ENSG00000136247 | validated |
| tarbase | hsa-miR-15b-5p  | BZW2     | 28969 | ENSG00000136261 | validated |
| tarbase | hsa-miR-326     | DGKB     | 1607  | ENSG00000136267 | validated |
| tarbase | hsa-miR-181a-5p | DGKB     | 1607  | ENSG00000136267 | validated |
| tarbase | hsa-miR-582-3p  | DDX56    | 54606 | ENSG00000136271 | validated |
| tarbase | hsa-miR-106b-5p | HUS1     | 3364  | ENSG00000136273 | validated |
| tarbase | hsa-miR-181a-5p | DBNL     | 28988 | ENSG00000136279 | validated |
| tarbase | hsa-miR-212-3p  | DBNL     | 28988 | ENSG00000136279 | validated |
| tarbase | hsa-miR-15b-5p  | MYO1G    | 64005 | ENSG00000136286 | validated |
| tarbase | hsa-miR-15b-5p  | TTYH3    | 80727 | ENSG00000136295 | validated |
| tarbase | hsa-miR-15b-5p  | CIDEA    | 27141 | ENSG00000136305 | validated |
| tarbase | hsa-miR-181a-5p | ABHD17C  | 58489 | ENSG00000136379 | validated |
| tarbase | hsa-miR-144-3p  | IREB2    | 3658  | ENSG00000136381 | validated |
| tarbase | hsa-miR-15b-5p  | IREB2    | 3658  | ENSG00000136381 | validated |
| tarbase | hsa-miR-505-3p  | IREB2    | 3658  | ENSG00000136381 | validated |
| tarbase | hsa-miR-222-3p  | ALPK3    | 57538 | ENSG00000136383 | validated |
| tarbase | hsa-miR-106b-5p | CALCOCO2 | 10241 | ENSG00000136436 | validated |
| tarbase | hsa-miR-181a-5p | CALCOCO2 | 10241 | ENSG00000136436 | validated |
| tarbase | hsa-miR-21-5p   | NMT1     | 4836  | ENSG00000136448 | validated |
| tarbase | hsa-miR-106b-5p | NMT1     | 4836  | ENSG00000136448 | validated |
| tarbase | hsa-miR-106b-5p | SRSF1    | 6426  | ENSG00000136450 | validated |
| tarbase | hsa-miR-212-3p  | SRSF1    | 6426  | ENSG00000136450 | validated |
| tarbase | hsa-miR-301a-3p | SRSF1    | 6426  | ENSG00000136450 | validated |
| tarbase | hsa-miR-181a-5p | SRSF1    | 6426  | ENSG00000136450 | validated |
| tarbase | hsa-miR-106b-5p | VEZF1    | 7716  | ENSG00000136451 | validated |
| tarbase | hsa-miR-212-3p  | VEZF1    | 7716  | ENSG00000136451 | validated |
| tarbase | hsa-miR-222-3p  | VEZF1    | 7716  | ENSG00000136451 | validated |
| tarbase | hsa-miR-301a-3p | VEZF1    | 7716  | ENSG00000136451 | validated |
| tarbase | hsa-miR-582-5p  | TEX2     | 55852 | ENSG00000136478 | validated |
| tarbase | hsa-miR-15b-5p  | DCAF7    | 10238 | ENSG00000136485 | validated |
| tarbase | hsa-miR-21-5p   | DCAF7    | 10238 | ENSG00000136485 | validated |
| tarbase | hsa-miR-296-5p  | DCAF7    | 10238 | ENSG00000136485 | validated |
| tarbase | hsa-miR-301a-3p | DCAF7    | 10238 | ENSG00000136485 | validated |
| tarbase | hsa-miR-181a-5p | DCAF7    | 10238 | ENSG00000136485 | validated |
| tarbase | hsa-miR-296-5p  | LIMD2    | 80774 | ENSG00000136490 | validated |
| tarbase | hsa-miR-18a-5p  | BRIP1    | 83990 | ENSG00000136492 | validated |

|         |                 |          |       |                 |           |
|---------|-----------------|----------|-------|-----------------|-----------|
| tarbase | hsa-miR-21-5p   | KAT7     | 11143 | ENSG00000136504 | validated |
| tarbase | hsa-miR-212-3p  | RTP4     | 64108 | ENSG00000136514 | validated |
| tarbase | hsa-miR-582-5p  | NDUFB5   | 4711  | ENSG00000136521 | validated |
| tarbase | hsa-miR-106b-5p | MARCHF7  | 64844 | ENSG00000136536 | validated |
| tarbase | hsa-miR-15b-5p  | MARCHF7  | 64844 | ENSG00000136536 | validated |
| tarbase | hsa-miR-582-5p  | MARCHF7  | 64844 | ENSG00000136536 | validated |
| tarbase | hsa-miR-144-3p  | SKIL     | 6498  | ENSG00000136603 | validated |
| tarbase | hsa-miR-15b-5p  | SKIL     | 6498  | ENSG00000136603 | validated |
| tarbase | hsa-miR-21-5p   | SKIL     | 6498  | ENSG00000136603 | validated |
| tarbase | hsa-miR-582-5p  | SKIL     | 6498  | ENSG00000136603 | validated |
| tarbase | hsa-miR-106b-5p | EPRS1    | 2058  | ENSG00000136628 | validated |
| tarbase | hsa-miR-21-5p   | EPRS1    | 2058  | ENSG00000136628 | validated |
| tarbase | hsa-miR-21-5p   | IL10     | 3586  | ENSG00000136634 | validated |
| tarbase | hsa-miR-212-3p  | KCTD3    | 51133 | ENSG00000136636 | validated |
| tarbase | hsa-miR-106b-5p | RPS6KC1  | 26750 | ENSG00000136643 | validated |
| tarbase | hsa-miR-181a-5p | WDR33    | 55339 | ENSG00000136709 | validated |
| tarbase | hsa-miR-18a-5p  | WDR33    | 55339 | ENSG00000136709 | validated |
| tarbase | hsa-miR-301a-3p | WDR33    | 55339 | ENSG00000136709 | validated |
| tarbase | hsa-miR-582-5p  | WDR33    | 55339 | ENSG00000136709 | validated |
| tarbase | hsa-miR-326     | SAP130   | 79595 | ENSG00000136715 | validated |
| tarbase | hsa-miR-192-5p  | UGGT1    | 56886 | ENSG00000136731 | validated |
| tarbase | hsa-miR-181a-5p | STAM     | 8027  | ENSG00000136738 | validated |
| tarbase | hsa-miR-181a-5p | GAD2     | 2572  | ENSG00000136750 | validated |
| tarbase | hsa-miR-106b-5p | ABI1     | 10006 | ENSG00000136754 | validated |
| tarbase | hsa-miR-106b-5p | TXN      | 7295  | ENSG00000136810 | validated |
| tarbase | hsa-miR-15b-5p  | ECPAS    | 23392 | ENSG00000136813 | validated |
| tarbase | hsa-miR-222-3p  | ECPAS    | 23392 | ENSG00000136813 | validated |
| tarbase | hsa-miR-18a-5p  | TOR1B    | 27348 | ENSG00000136816 | validated |
| tarbase | hsa-miR-181a-5p | SMC2     | 10592 | ENSG00000136824 | validated |
| tarbase | hsa-miR-18a-5p  | TOR1A    | 1861  | ENSG00000136827 | validated |
| tarbase | hsa-miR-106b-5p | TOR1A    | 1861  | ENSG00000136827 | validated |
| tarbase | hsa-miR-212-3p  | NIBAN2   | 64855 | ENSG00000136830 | validated |
| tarbase | hsa-miR-212-3p  | TMOD1    | 7111  | ENSG00000136842 | validated |
| tarbase | hsa-miR-18a-5p  | SLC2A8   | 29988 | ENSG00000136856 | validated |
| tarbase | hsa-miR-192-5p  | CDK5RAP2 | 55755 | ENSG00000136861 | validated |
| tarbase | hsa-miR-582-3p  | ZFP37    | 7539  | ENSG00000136866 | validated |
| tarbase | hsa-miR-212-3p  | ZFP37    | 7539  | ENSG00000136866 | validated |
| tarbase | hsa-miR-15b-5p  | SLC31A1  | 1317  | ENSG00000136868 | validated |
| tarbase | hsa-miR-181a-5p | SLC31A1  | 1317  | ENSG00000136868 | validated |
| tarbase | hsa-miR-505-3p  | SLC31A1  | 1317  | ENSG00000136868 | validated |
| tarbase | hsa-miR-106b-5p | SLC31A1  | 1317  | ENSG00000136868 | validated |
| tarbase | hsa-miR-181a-5p | ZNF189   | 7743  | ENSG00000136870 | validated |
| tarbase | hsa-miR-106b-5p | ATP6V1G1 | 9550  | ENSG00000136888 | validated |
| tarbase | hsa-miR-15b-5p  | ATP6V1G1 | 9550  | ENSG00000136888 | validated |
| tarbase | hsa-miR-21-5p   | ATP6V1G1 | 9550  | ENSG00000136888 | validated |
| tarbase | hsa-miR-106b-5p | TEX10    | 54881 | ENSG00000136891 | validated |
| tarbase | hsa-miR-181a-5p | MRPL50   | 54534 | ENSG00000136897 | validated |
| tarbase | hsa-miR-181a-5p | GABBR2   | 9568  | ENSG00000136928 | validated |
| tarbase | hsa-miR-15b-5p  | GABBR2   | 9568  | ENSG00000136928 | validated |
| tarbase | hsa-miR-106b-5p | TRMO     | 51531 | ENSG00000136932 | validated |
| tarbase | hsa-miR-222-3p  | TRMO     | 51531 | ENSG00000136932 | validated |
| tarbase | hsa-miR-15b-5p  | GOLGA1   | 2800  | ENSG00000136935 | validated |
| tarbase | hsa-miR-301a-3p | NCBP1    | 4686  | ENSG00000136937 | validated |
| tarbase | hsa-miR-106b-5p | ANP32B   | 10541 | ENSG00000136938 | validated |
| tarbase | hsa-miR-212-3p  | ANP32B   | 10541 | ENSG00000136938 | validated |
| tarbase | hsa-miR-21-5p   | ANP32B   | 10541 | ENSG00000136938 | validated |
| tarbase | hsa-miR-222-3p  | ANP32B   | 10541 | ENSG00000136938 | validated |
| tarbase | hsa-miR-301a-3p | LMX1B    | 4010  | ENSG00000136944 | validated |
| tarbase | hsa-miR-18a-5p  | ENPP2    | 5168  | ENSG00000136960 | validated |
| tarbase | hsa-miR-212-3p  | ENPP2    | 5168  | ENSG00000136960 | validated |
| tarbase | hsa-miR-21-5p   | ENPP2    | 5168  | ENSG00000136960 | validated |
| tarbase | hsa-miR-192-5p  | MYC      | 4609  | ENSG00000136997 | validated |
| tarbase | hsa-miR-301a-3p | MYC      | 4609  | ENSG00000136997 | validated |
| tarbase | hsa-miR-582-3p  | MYC      | 4609  | ENSG00000136997 | validated |
| tarbase | hsa-miR-106b-5p | RANBP6   | 26953 | ENSG00000137040 | validated |
| tarbase | hsa-miR-15b-5p  | RANBP6   | 26953 | ENSG00000137040 | validated |
| tarbase | hsa-miR-106b-5p | POLR1E   | 64425 | ENSG00000137054 | validated |
| tarbase | hsa-miR-106b-5p | PLAA     | 9373  | ENSG00000137055 | validated |
| tarbase | hsa-miR-15b-5p  | PLAA     | 9373  | ENSG00000137055 | validated |
| tarbase | hsa-miR-15b-5p  | UBAP2    | 55833 | ENSG00000137073 | validated |
| tarbase | hsa-miR-301a-3p | UBAP2    | 55833 | ENSG00000137073 | validated |

|         |                 |          |        |                 |           |
|---------|-----------------|----------|--------|-----------------|-----------|
| tarbase | hsa-miR-582-3p  | UBAP2    | 55833  | ENSG00000137073 | validated |
| tarbase | hsa-miR-106b-5p | RNF38    | 152006 | ENSG00000137075 | validated |
| tarbase | hsa-miR-18a-5p  | RNF38    | 152006 | ENSG00000137075 | validated |
| tarbase | hsa-miR-21-5p   | RNF38    | 152006 | ENSG00000137075 | validated |
| tarbase | hsa-miR-301a-3p | RNF38    | 152006 | ENSG00000137075 | validated |
| tarbase | hsa-miR-21-5p   | TLN1     | 7094   | ENSG00000137076 | validated |
| tarbase | hsa-miR-296-5p  | TLN1     | 7094   | ENSG00000137076 | validated |
| tarbase | hsa-miR-106b-5p | TLN1     | 7094   | ENSG00000137076 | validated |
| tarbase | hsa-miR-505-3p  | ALDH1B1  | 219    | ENSG00000137124 | validated |
| tarbase | hsa-miR-212-3p  | ARHGEF39 | 84904  | ENSG00000137135 | validated |
| tarbase | hsa-miR-21-5p   | DENND4C  | 55667  | ENSG00000137145 | validated |
| tarbase | hsa-miR-301a-3p | RPS6     | 6194   | ENSG00000137154 | validated |
| tarbase | hsa-miR-106b-5p | KIF13A   | 63971  | ENSG00000137177 | validated |
| tarbase | hsa-miR-582-5p  | KIF13A   | 63971  | ENSG00000137177 | validated |
| tarbase | hsa-miR-21-5p   | ZSCAN9   | 7746   | ENSG00000137185 | validated |
| tarbase | hsa-miR-582-5p  | PIM1     | 5292   | ENSG00000137193 | validated |
| tarbase | hsa-miR-18a-5p  | TFAP2A   | 7020   | ENSG00000137203 | validated |
| tarbase | hsa-miR-15b-5p  | YIPF3    | 25844  | ENSG00000137207 | validated |
| tarbase | hsa-miR-18a-5p  | TJAP1    | 93643  | ENSG00000137221 | validated |
| tarbase | hsa-miR-212-3p  | IRF4     | 3662   | ENSG00000137265 | validated |
| tarbase | hsa-miR-21-5p   | IRF4     | 3662   | ENSG00000137265 | validated |
| tarbase | hsa-miR-296-5p  | IRF4     | 3662   | ENSG00000137265 | validated |
| tarbase | hsa-miR-505-3p  | IRF4     | 3662   | ENSG00000137265 | validated |
| tarbase | hsa-miR-582-5p  | IRF4     | 3662   | ENSG00000137265 | validated |
| tarbase | hsa-miR-144-3p  | SLC22A23 | 63027  | ENSG00000137266 | validated |
| tarbase | hsa-miR-181a-5p | SLC22A23 | 63027  | ENSG00000137266 | validated |
| tarbase | hsa-miR-212-3p  | SLC22A23 | 63027  | ENSG00000137266 | validated |
| tarbase | hsa-miR-212-3p  | TUBB2A   | 7280   | ENSG00000137267 | validated |
| tarbase | hsa-miR-15b-5p  | LRRC1    | 55227  | ENSG00000137269 | validated |
| tarbase | hsa-miR-192-5p  | LRRC1    | 55227  | ENSG00000137269 | validated |
| tarbase | hsa-miR-106b-5p | FOXF2    | 2295   | ENSG00000137273 | validated |
| tarbase | hsa-miR-301a-3p | FOXF2    | 2295   | ENSG00000137273 | validated |
| tarbase | hsa-miR-326     | FOXF2    | 2295   | ENSG00000137273 | validated |
| tarbase | hsa-miR-106b-5p | RIPK1    | 8737   | ENSG00000137275 | validated |
| tarbase | hsa-miR-21-5p   | UQCC2    | 84300  | ENSG00000137288 | validated |
| tarbase | hsa-miR-15b-5p  | RNF144B  | 255488 | ENSG00000137393 | validated |
| tarbase | hsa-miR-212-3p  | RNF144B  | 255488 | ENSG00000137393 | validated |
| tarbase | hsa-miR-582-3p  | MTCH1    | 23787  | ENSG00000137409 | validated |
| tarbase | hsa-miR-106b-5p | FAM8A1   | 51439  | ENSG00000137414 | validated |
| tarbase | hsa-miR-212-3p  | C6orf52  | 347744 | ENSG00000137434 | validated |
| tarbase | hsa-miR-212-3p  | CPEB2    | 132864 | ENSG00000137449 | validated |
| tarbase | hsa-miR-181a-5p | CPEB2    | 132864 | ENSG00000137449 | validated |
| tarbase | hsa-miR-15b-5p  | FHDC1    | 85462  | ENSG00000137460 | validated |
| tarbase | hsa-miR-212-3p  | TTC29    | 83894  | ENSG00000137473 | validated |
| tarbase | hsa-miR-212-3p  | SYTL2    | 54843  | ENSG00000137501 | validated |
| tarbase | hsa-miR-212-3p  | RAB30    | 27314  | ENSG00000137502 | validated |
| tarbase | hsa-miR-15b-5p  | CREBZF   | 58487  | ENSG00000137504 | validated |
| tarbase | hsa-miR-181a-5p | CREBZF   | 58487  | ENSG00000137504 | validated |
| tarbase | hsa-miR-18a-5p  | CREBZF   | 58487  | ENSG00000137504 | validated |
| tarbase | hsa-miR-15b-5p  | PRCP     | 5547   | ENSG00000137509 | validated |
| tarbase | hsa-miR-181a-5p | PRCP     | 5547   | ENSG00000137509 | validated |
| tarbase | hsa-miR-301a-3p | MRPL15   | 29088  | ENSG00000137547 | validated |
| tarbase | hsa-miR-18a-5p  | GGH      | 8836   | ENSG00000137563 | validated |
| tarbase | hsa-miR-212-3p  | SLCO5A1  | 81796  | ENSG00000137571 | validated |
| tarbase | hsa-miR-106b-5p | SDCBP    | 6386   | ENSG00000137575 | validated |
| tarbase | hsa-miR-212-3p  | SDCBP    | 6386   | ENSG00000137575 | validated |
| tarbase | hsa-miR-222-3p  | SDCBP    | 6386   | ENSG00000137575 | validated |
| tarbase | hsa-miR-15b-5p  | SDCBP    | 6386   | ENSG00000137575 | validated |
| tarbase | hsa-miR-212-3p  | DDX60    | 55601  | ENSG00000137628 | validated |
| tarbase | hsa-miR-212-3p  | TMPRSS4  | 56649  | ENSG00000137648 | validated |
| tarbase | hsa-miR-192-5p  | BUD13    | 84811  | ENSG00000137656 | validated |
| tarbase | hsa-miR-212-3p  | CFAP300  | 85016  | ENSG00000137691 | validated |
| tarbase | hsa-miR-212-3p  | DCUN1D5  | 84259  | ENSG00000137692 | validated |
| tarbase | hsa-miR-15b-5p  | YAP1     | 10413  | ENSG00000137693 | validated |
| tarbase | hsa-miR-181a-5p | YAP1     | 10413  | ENSG00000137693 | validated |
| tarbase | hsa-miR-212-3p  | YAP1     | 10413  | ENSG00000137693 | validated |
| tarbase | hsa-miR-21-5p   | YAP1     | 10413  | ENSG00000137693 | validated |
| tarbase | hsa-miR-301a-3p | RDX      | 5962   | ENSG00000137710 | validated |
| tarbase | hsa-miR-106b-5p | RDX      | 5962   | ENSG00000137710 | validated |
| tarbase | hsa-miR-15b-5p  | PPP2R1B  | 5519   | ENSG00000137713 | validated |
| tarbase | hsa-miR-18a-5p  | PPP2R1B  | 5519   | ENSG00000137713 | validated |

|         |                 |          |        |                 |           |
|---------|-----------------|----------|--------|-----------------|-----------|
| tarbase | hsa-miR-212-3p  | PPP2R1B  | 5519   | ENSG00000137713 | validated |
| tarbase | hsa-miR-21-5p   | PPP2R1B  | 5519   | ENSG00000137713 | validated |
| tarbase | hsa-miR-106b-5p | FDX1     | 2230   | ENSG00000137714 | validated |
| tarbase | hsa-miR-21-5p   | C11orf1  | 64776  | ENSG00000137720 | validated |
| tarbase | hsa-miR-326     | FXVD2    | 486    | ENSG00000137731 | validated |
| tarbase | hsa-miR-301a-3p | MMP13    | 4322   | ENSG00000137745 | validated |
| tarbase | hsa-miR-15b-5p  | UNC13C   | 440279 | ENSG00000137766 | validated |
| tarbase | hsa-miR-212-3p  | SQOR     | 58472  | ENSG00000137767 | validated |
| tarbase | hsa-miR-106b-5p | CTDSPL2  | 51496  | ENSG00000137770 | validated |
| tarbase | hsa-miR-181a-5p | CTDSPL2  | 51496  | ENSG00000137770 | validated |
| tarbase | hsa-miR-181a-5p | THBS1    | 7057   | ENSG00000137801 | validated |
| tarbase | hsa-miR-21-5p   | THBS1    | 7057   | ENSG00000137801 | validated |
| tarbase | hsa-miR-222-3p  | THBS1    | 7057   | ENSG00000137801 | validated |
| tarbase | hsa-miR-505-3p  | THBS1    | 7057   | ENSG00000137801 | validated |
| tarbase | hsa-miR-21-5p   | NUSAP1   | 51203  | ENSG00000137804 | validated |
| tarbase | hsa-miR-212-3p  | RTF1     | 23168  | ENSG00000137815 | validated |
| tarbase | hsa-miR-21-5p   | RTF1     | 23168  | ENSG00000137815 | validated |
| tarbase | hsa-miR-582-3p  | RTF1     | 23168  | ENSG00000137815 | validated |
| tarbase | hsa-miR-15b-5p  | RPLP1    | 6176   | ENSG00000137818 | validated |
| tarbase | hsa-miR-181a-5p | RPLP1    | 6176   | ENSG00000137818 | validated |
| tarbase | hsa-miR-21-5p   | RPLP1    | 6176   | ENSG00000137818 | validated |
| tarbase | hsa-miR-106b-5p | RMDN3    | 55177  | ENSG00000137824 | validated |
| tarbase | hsa-miR-15b-5p  | ADAM10   | 102    | ENSG00000137845 | validated |
| tarbase | hsa-miR-106b-5p | ZNF280D  | 54816  | ENSG00000137871 | validated |
| tarbase | hsa-miR-21-5p   | ZNF280D  | 54816  | ENSG00000137871 | validated |
| tarbase | hsa-miR-106b-5p | SEMA6D   | 80031  | ENSG00000137872 | validated |
| tarbase | hsa-miR-212-3p  | SEMA6D   | 80031  | ENSG00000137872 | validated |
| tarbase | hsa-miR-222-3p  | SEMA6D   | 80031  | ENSG00000137872 | validated |
| tarbase | hsa-miR-582-5p  | SEMA6D   | 80031  | ENSG00000137872 | validated |
| tarbase | hsa-miR-192-5p  | RSL24D1  | 51187  | ENSG00000137876 | validated |
| tarbase | hsa-miR-106b-5p | RSL24D1  | 51187  | ENSG00000137876 | validated |
| tarbase | hsa-miR-296-5p  | BCAR3    | 8412   | ENSG00000137936 | validated |
| tarbase | hsa-miR-181a-5p | TTL7     | 79739  | ENSG00000137941 | validated |
| tarbase | hsa-miR-222-3p  | GTF2B    | 2959   | ENSG00000137947 | validated |
| tarbase | hsa-miR-212-3p  | RABGGTB  | 5876   | ENSG00000137955 | validated |
| tarbase | hsa-miR-106b-5p | IFI44L   | 10964  | ENSG00000137959 | validated |
| tarbase | hsa-miR-212-3p  | IFI44L   | 10964  | ENSG00000137959 | validated |
| tarbase | hsa-miR-21-5p   | IFI44L   | 10964  | ENSG00000137959 | validated |
| tarbase | hsa-miR-106b-5p | GIPC2    | 54810  | ENSG00000137960 | validated |
| tarbase | hsa-miR-181a-5p | ARHGAP29 | 9411   | ENSG00000137962 | validated |
| tarbase | hsa-miR-212-3p  | IFI44    | 10561  | ENSG00000137965 | validated |
| tarbase | hsa-miR-106b-5p | DBT      | 1629   | ENSG00000137992 | validated |
| tarbase | hsa-miR-582-5p  | DBT      | 1629   | ENSG00000137992 | validated |
| tarbase | hsa-miR-301a-3p | RTCA     | 8634   | ENSG00000137996 | validated |
| tarbase | hsa-miR-181a-5p | SELENOI  | 85465  | ENSG00000138018 | validated |
| tarbase | hsa-miR-212-3p  | SELENOI  | 85465  | ENSG00000138018 | validated |
| tarbase | hsa-miR-582-5p  | SELENOI  | 85465  | ENSG00000138018 | validated |
| tarbase | hsa-miR-212-3p  | CGREF1   | 10669  | ENSG00000138028 | validated |
| tarbase | hsa-miR-15b-5p  | PPM1B    | 5495   | ENSG00000138032 | validated |
| tarbase | hsa-miR-181a-5p | PPM1B    | 5495   | ENSG00000138032 | validated |
| tarbase | hsa-miR-181a-5p | PNPT1    | 87178  | ENSG00000138035 | validated |
| tarbase | hsa-miR-212-3p  | THUMPD2  | 80745  | ENSG00000138050 | validated |
| tarbase | hsa-miR-181a-5p | CYP1B1   | 1545   | ENSG00000138061 | validated |
| tarbase | hsa-miR-222-3p  | CYP1B1   | 1545   | ENSG00000138061 | validated |
| tarbase | hsa-miR-144-3p  | RAB1A    | 5861   | ENSG00000138069 | validated |
| tarbase | hsa-miR-181a-5p | RAB1A    | 5861   | ENSG00000138069 | validated |
| tarbase | hsa-miR-212-3p  | RAB1A    | 5861   | ENSG00000138069 | validated |
| tarbase | hsa-miR-21-5p   | RAB1A    | 5861   | ENSG00000138069 | validated |
| tarbase | hsa-miR-222-3p  | RAB1A    | 5861   | ENSG00000138069 | validated |
| tarbase | hsa-miR-301a-3p | RAB1A    | 5861   | ENSG00000138069 | validated |
| tarbase | hsa-miR-212-3p  | ACTR2    | 10097  | ENSG00000138071 | validated |
| tarbase | hsa-miR-181a-5p | ACTR2    | 10097  | ENSG00000138071 | validated |
| tarbase | hsa-miR-582-3p  | SLC5A6   | 8884   | ENSG00000138074 | validated |
| tarbase | hsa-miR-106b-5p | PREPL    | 9581   | ENSG00000138078 | validated |
| tarbase | hsa-miR-144-3p  | PREPL    | 9581   | ENSG00000138078 | validated |
| tarbase | hsa-miR-582-5p  | PREPL    | 9581   | ENSG00000138078 | validated |
| tarbase | hsa-miR-181a-5p | PREPL    | 9581   | ENSG00000138078 | validated |
| tarbase | hsa-miR-106b-5p | FBXO11   | 80204  | ENSG00000138081 | validated |
| tarbase | hsa-miR-582-5p  | FBXO11   | 80204  | ENSG00000138081 | validated |
| tarbase | hsa-miR-301a-3p | ATRAID   | 51374  | ENSG00000138085 | validated |
| tarbase | hsa-miR-212-3p  | CENPO    | 79172  | ENSG00000138092 | validated |

|         |                 |           |        |                 |           |
|---------|-----------------|-----------|--------|-----------------|-----------|
| tarbase | hsa-miR-106b-5p | ACTR1A    | 10121  | ENSG00000138107 | validated |
| tarbase | hsa-miR-296-5p  | ACTR1A    | 10121  | ENSG00000138107 | validated |
| tarbase | hsa-miR-181a-5p | ATAD1     | 84896  | ENSG00000138138 | validated |
| tarbase | hsa-miR-21-5p   | DUSP5     | 1847   | ENSG00000138166 | validated |
| tarbase | hsa-miR-144-3p  | CEP55     | 55165  | ENSG00000138180 | validated |
| tarbase | hsa-miR-181a-5p | CEP55     | 55165  | ENSG00000138180 | validated |
| tarbase | hsa-miR-222-3p  | ENTPD1    | 953    | ENSG00000138185 | validated |
| tarbase | hsa-miR-181a-5p | DNAJC13   | 23317  | ENSG00000138246 | validated |
| tarbase | hsa-miR-106b-5p | ANXA7     | 310    | ENSG00000138279 | validated |
| tarbase | hsa-miR-192-5p  | ANXA7     | 310    | ENSG00000138279 | validated |
| tarbase | hsa-miR-106b-5p | TET1      | 80312  | ENSG00000138336 | validated |
| tarbase | hsa-miR-192-5p  | MYPN      | 84665  | ENSG00000138347 | validated |
| tarbase | hsa-miR-15b-5p  | BARD1     | 580    | ENSG00000138376 | validated |
| tarbase | hsa-miR-181a-5p | BARD1     | 580    | ENSG00000138376 | validated |
| tarbase | hsa-miR-15b-5p  | ASNSD1    | 54529  | ENSG00000138381 | validated |
| tarbase | hsa-miR-144-3p  | SSB       | 6741   | ENSG00000138385 | validated |
| tarbase | hsa-miR-181a-5p | SSB       | 6741   | ENSG00000138385 | validated |
| tarbase | hsa-miR-181a-5p | NAB1      | 4664   | ENSG00000138386 | validated |
| tarbase | hsa-miR-18a-5p  | NAB1      | 4664   | ENSG00000138386 | validated |
| tarbase | hsa-miR-212-3p  | MDH1B     | 130752 | ENSG00000138400 | validated |
| tarbase | hsa-miR-21-5p   | OLA1      | 29789  | ENSG00000138430 | validated |
| tarbase | hsa-miR-15b-5p  | ABI2      | 10152  | ENSG00000138443 | validated |
| tarbase | hsa-miR-21-5p   | ABI2      | 10152  | ENSG00000138443 | validated |
| tarbase | hsa-miR-18a-5p  | ABI2      | 10152  | ENSG00000138443 | validated |
| tarbase | hsa-miR-582-3p  | ITGAV     | 3685   | ENSG00000138448 | validated |
| tarbase | hsa-miR-106b-5p | SLC40A1   | 30061  | ENSG00000138449 | validated |
| tarbase | hsa-miR-222-3p  | SLC40A1   | 30061  | ENSG00000138449 | validated |
| tarbase | hsa-miR-181a-5p | SLC35A5   | 55032  | ENSG00000138459 | validated |
| tarbase | hsa-miR-212-3p  | SENP7     | 57337  | ENSG00000138468 | validated |
| tarbase | hsa-miR-212-3p  | PARP9     | 83666  | ENSG00000138496 | validated |
| tarbase | hsa-miR-222-3p  | USP8      | 9101   | ENSG00000138592 | validated |
| tarbase | hsa-miR-15b-5p  | SECISBP2L | 9728   | ENSG00000138593 | validated |
| tarbase | hsa-miR-18a-5p  | SECISBP2L | 9728   | ENSG00000138593 | validated |
| tarbase | hsa-miR-222-3p  | SECISBP2L | 9728   | ENSG00000138593 | validated |
| tarbase | hsa-miR-505-3p  | SECISBP2L | 9728   | ENSG00000138593 | validated |
| tarbase | hsa-miR-144-3p  | SPPL2A    | 84888  | ENSG00000138600 | validated |
| tarbase | hsa-miR-21-5p   | SPPL2A    | 84888  | ENSG00000138600 | validated |
| tarbase | hsa-miR-301a-3p | SPPL2A    | 84888  | ENSG00000138600 | validated |
| tarbase | hsa-miR-582-5p  | SPPL2A    | 84888  | ENSG00000138600 | validated |
| tarbase | hsa-miR-15b-5p  | GLCE      | 26035  | ENSG00000138604 | validated |
| tarbase | hsa-miR-301a-3p | GLCE      | 26035  | ENSG00000138604 | validated |
| tarbase | hsa-miR-582-3p  | GLCE      | 26035  | ENSG00000138604 | validated |
| tarbase | hsa-miR-18a-5p  | APH1B     | 83464  | ENSG00000138613 | validated |
| tarbase | hsa-miR-18a-5p  | INTS14    | 81556  | ENSG00000138614 | validated |
| tarbase | hsa-miR-21-5p   | INTS14    | 81556  | ENSG00000138614 | validated |
| tarbase | hsa-miR-301a-3p | INTS14    | 81556  | ENSG00000138614 | validated |
| tarbase | hsa-miR-212-3p  | INTS14    | 81556  | ENSG00000138614 | validated |
| tarbase | hsa-miR-15b-5p  | PARP16    | 54956  | ENSG00000138617 | validated |
| tarbase | hsa-miR-181a-5p | SEMA7A    | 8482   | ENSG00000138623 | validated |
| tarbase | hsa-miR-18a-5p  | SEMA7A    | 8482   | ENSG00000138623 | validated |
| tarbase | hsa-miR-301a-3p | UBL7      | 84993  | ENSG00000138629 | validated |
| tarbase | hsa-miR-21-5p   | ARHGAP24  | 83478  | ENSG00000138639 | validated |
| tarbase | hsa-miR-212-3p  | HERC3     | 8916   | ENSG00000138641 | validated |
| tarbase | hsa-miR-301a-3p | HERC6     | 55008  | ENSG00000138642 | validated |
| tarbase | hsa-miR-212-3p  | HERC6     | 55008  | ENSG00000138642 | validated |
| tarbase | hsa-miR-212-3p  | HERC5     | 51191  | ENSG00000138646 | validated |
| tarbase | hsa-miR-106b-5p | NDST4     | 64579  | ENSG00000138653 | validated |
| tarbase | hsa-miR-18a-5p  | NDST4     | 64579  | ENSG00000138653 | validated |
| tarbase | hsa-miR-212-3p  | NDST4     | 64579  | ENSG00000138653 | validated |
| tarbase | hsa-miR-21-5p   | ZGRF1     | 55345  | ENSG00000138658 | validated |
| tarbase | hsa-miR-212-3p  | AP1AR     | 55435  | ENSG00000138660 | validated |
| tarbase | hsa-miR-181a-5p | AP1AR     | 55435  | ENSG00000138660 | validated |
| tarbase | hsa-miR-21-5p   | COPS4     | 51138  | ENSG00000138663 | validated |
| tarbase | hsa-miR-18a-5p  | HNRNPD    | 3184   | ENSG00000138668 | validated |
| tarbase | hsa-miR-181a-5p | HNRNPD    | 3184   | ENSG00000138668 | validated |
| tarbase | hsa-miR-15b-5p  | RASGEF1B  | 153020 | ENSG00000138670 | validated |
| tarbase | hsa-miR-181a-5p | SEC31A    | 22872  | ENSG00000138674 | validated |
| tarbase | hsa-miR-106b-5p | FGF5      | 2250   | ENSG00000138675 | validated |
| tarbase | hsa-miR-181a-5p | GPAT3     | 84803  | ENSG00000138678 | validated |
| tarbase | hsa-miR-106b-5p | FGF2      | 2247   | ENSG00000138685 | validated |
| tarbase | hsa-miR-181a-5p | BBS7      | 55212  | ENSG00000138686 | validated |

|         |                 |          |        |                 |           |
|---------|-----------------|----------|--------|-----------------|-----------|
| tarbase | hsa-miR-15b-5p  | BBS7     | 55212  | ENSG00000138686 | validated |
| tarbase | hsa-miR-181a-5p | KIAA1109 | 84162  | ENSG00000138688 | validated |
| tarbase | hsa-miR-18a-5p  | KIAA1109 | 84162  | ENSG00000138688 | validated |
| tarbase | hsa-miR-301a-3p | KIAA1109 | 84162  | ENSG00000138688 | validated |
| tarbase | hsa-miR-212-3p  | LARP1B   | 55132  | ENSG00000138709 | validated |
| tarbase | hsa-miR-181a-5p | MMRN1    | 22915  | ENSG00000138722 | validated |
| tarbase | hsa-miR-212-3p  | PRDM5    | 11107  | ENSG00000138738 | validated |
| tarbase | hsa-miR-18a-5p  | NAAA     | 27163  | ENSG00000138744 | validated |
| tarbase | hsa-miR-18a-5p  | NUP54    | 53371  | ENSG00000138750 | validated |
| tarbase | hsa-miR-106b-5p | BMP2K    | 55589  | ENSG00000138756 | validated |
| tarbase | hsa-miR-212-3p  | G3BP2    | 9908   | ENSG00000138757 | validated |
| tarbase | hsa-miR-21-5p   | G3BP2    | 9908   | ENSG00000138757 | validated |
| tarbase | hsa-miR-301a-3p | G3BP2    | 9908   | ENSG00000138757 | validated |
| tarbase | hsa-miR-181a-5p | SEPTIN11 | 55752  | ENSG00000138758 | validated |
| tarbase | hsa-miR-18a-5p  | SEPTIN11 | 55752  | ENSG00000138758 | validated |
| tarbase | hsa-miR-21-5p   | SEPTIN11 | 55752  | ENSG00000138758 | validated |
| tarbase | hsa-miR-15b-5p  | SCARB2   | 950    | ENSG00000138760 | validated |
| tarbase | hsa-miR-106b-5p | CCNG2    | 901    | ENSG00000138764 | validated |
| tarbase | hsa-miR-15b-5p  | CCNG2    | 901    | ENSG00000138764 | validated |
| tarbase | hsa-miR-181a-5p | CCNG2    | 901    | ENSG00000138764 | validated |
| tarbase | hsa-miR-21-5p   | CCNG2    | 901    | ENSG00000138764 | validated |
| tarbase | hsa-miR-301a-3p | CCNG2    | 901    | ENSG00000138764 | validated |
| tarbase | hsa-miR-212-3p  | CCNG2    | 901    | ENSG00000138764 | validated |
| tarbase | hsa-miR-15b-5p  | CNOT6L   | 246175 | ENSG00000138767 | validated |
| tarbase | hsa-miR-181a-5p | CNOT6L   | 246175 | ENSG00000138767 | validated |
| tarbase | hsa-miR-21-5p   | CNOT6L   | 246175 | ENSG00000138767 | validated |
| tarbase | hsa-miR-15b-5p  | USO1     | 8615   | ENSG00000138768 | validated |
| tarbase | hsa-miR-18a-5p  | USO1     | 8615   | ENSG00000138768 | validated |
| tarbase | hsa-miR-106b-5p | SHROOM3  | 57619  | ENSG00000138771 | validated |
| tarbase | hsa-miR-181a-5p | SHROOM3  | 57619  | ENSG00000138771 | validated |
| tarbase | hsa-miR-212-3p  | CENPE    | 1062   | ENSG00000138778 | validated |
| tarbase | hsa-miR-15b-5p  | GSTCD    | 79807  | ENSG00000138780 | validated |
| tarbase | hsa-miR-181a-5p | GSTCD    | 79807  | ENSG00000138780 | validated |
| tarbase | hsa-miR-212-3p  | ENPEP    | 2028   | ENSG00000138792 | validated |
| tarbase | hsa-miR-21-5p   | HADH     | 3033   | ENSG00000138796 | validated |
| tarbase | hsa-miR-222-3p  | SEC24B   | 10427  | ENSG00000138802 | validated |
| tarbase | hsa-miR-296-5p  | SLC39A8  | 64116  | ENSG00000138821 | validated |
| tarbase | hsa-miR-301a-3p | SLC39A8  | 64116  | ENSG00000138821 | validated |
| tarbase | hsa-miR-212-3p  | MTTP     | 4547   | ENSG00000138823 | validated |
| tarbase | hsa-miR-15b-5p  | FBN2     | 2201   | ENSG00000138829 | validated |
| tarbase | hsa-miR-18a-5p  | FBN2     | 2201   | ENSG00000138829 | validated |
| tarbase | hsa-miR-582-5p  | FBN2     | 2201   | ENSG00000138829 | validated |
| tarbase | hsa-miR-15b-5p  | GUCD1    | 83606  | ENSG00000138867 | validated |
| tarbase | hsa-miR-301a-3p | GUCD1    | 83606  | ENSG00000138867 | validated |
| tarbase | hsa-miR-15b-5p  | B4GALNT3 | 283358 | ENSG00000139044 | validated |
| tarbase | hsa-miR-181a-5p | ETV6     | 2120   | ENSG00000139083 | validated |
| tarbase | hsa-miR-15b-5p  | KIF21A   | 55605  | ENSG00000139116 | validated |
| tarbase | hsa-miR-18a-5p  | KIF21A   | 55605  | ENSG00000139116 | validated |
| tarbase | hsa-miR-21-5p   | KIF21A   | 55605  | ENSG00000139116 | validated |
| tarbase | hsa-miR-296-5p  | CPNE8    | 144402 | ENSG00000139117 | validated |
| tarbase | hsa-miR-106b-5p | FGD4     | 121512 | ENSG00000139132 | validated |
| tarbase | hsa-miR-15b-5p  | FGD4     | 121512 | ENSG00000139132 | validated |
| tarbase | hsa-miR-181a-5p | FGD4     | 121512 | ENSG00000139132 | validated |
| tarbase | hsa-miR-15b-5p  | AEBP2    | 121536 | ENSG00000139154 | validated |
| tarbase | hsa-miR-18a-5p  | AEBP2    | 121536 | ENSG00000139154 | validated |
| tarbase | hsa-miR-326     | AEBP2    | 121536 | ENSG00000139154 | validated |
| tarbase | hsa-miR-106b-5p | ETNK1    | 55500  | ENSG00000139163 | validated |
| tarbase | hsa-miR-181a-5p | ETNK1    | 55500  | ENSG00000139163 | validated |
| tarbase | hsa-miR-212-3p  | ETNK1    | 55500  | ENSG00000139163 | validated |
| tarbase | hsa-miR-222-3p  | ETNK1    | 55500  | ENSG00000139163 | validated |
| tarbase | hsa-miR-582-5p  | ETNK1    | 55500  | ENSG00000139163 | validated |
| tarbase | hsa-miR-15b-5p  | ZCRB1    | 85437  | ENSG00000139168 | validated |
| tarbase | hsa-miR-212-3p  | RBP5     | 83758  | ENSG00000139194 | validated |
| tarbase | hsa-miR-301a-3p | AMIGO2   | 347902 | ENSG00000139211 | validated |
| tarbase | hsa-miR-181a-5p | SCAF11   | 9169   | ENSG00000139218 | validated |
| tarbase | hsa-miR-301a-3p | COL2A1   | 1280   | ENSG00000139219 | validated |
| tarbase | hsa-miR-181a-5p | ANP32D   | 23519  | ENSG00000139223 | validated |
| tarbase | hsa-miR-18a-5p  | LLPH     | 84298  | ENSG00000139233 | validated |
| tarbase | hsa-miR-212-3p  | LRIG3    | 121227 | ENSG00000139263 | validated |
| tarbase | hsa-miR-15b-5p  | MARCHF9  | 92979  | ENSG00000139266 | validated |
| tarbase | hsa-miR-15b-5p  | TPH2     | 121278 | ENSG00000139287 | validated |

|         |                 |          |        |                 |           |
|---------|-----------------|----------|--------|-----------------|-----------|
| tarbase | hsa-miR-106b-5p | PHLDA1   | 22822  | ENSG00000139289 | validated |
| tarbase | hsa-miR-106b-5p | TMEM19   | 55266  | ENSG00000139291 | validated |
| tarbase | hsa-miR-192-5p  | TMEM19   | 55266  | ENSG00000139291 | validated |
| tarbase | hsa-miR-222-3p  | TMEM19   | 55266  | ENSG00000139291 | validated |
| tarbase | hsa-miR-301a-3p | TMEM19   | 55266  | ENSG00000139291 | validated |
| tarbase | hsa-miR-181a-5p | TMEM19   | 55266  | ENSG00000139291 | validated |
| tarbase | hsa-miR-15b-5p  | DUSP6    | 1848   | ENSG00000139318 | validated |
| tarbase | hsa-miR-15b-5p  | TMTC3    | 160418 | ENSG00000139324 | validated |
| tarbase | hsa-miR-15b-5p  | SLC15A4  | 121260 | ENSG00000139370 | validated |
| tarbase | hsa-miR-106b-5p | GIT2     | 9815   | ENSG00000139436 | validated |
| tarbase | hsa-miR-18a-5p  | GIT2     | 9815   | ENSG00000139436 | validated |
| tarbase | hsa-miR-582-5p  | GIT2     | 9815   | ENSG00000139436 | validated |
| tarbase | hsa-miR-106b-5p | NUP58    | 9818   | ENSG00000139496 | validated |
| tarbase | hsa-miR-15b-5p  | NUP58    | 9818   | ENSG00000139496 | validated |
| tarbase | hsa-miR-212-3p  | NUP58    | 9818   | ENSG00000139496 | validated |
| tarbase | hsa-miR-21-5p   | NUP58    | 9818   | ENSG00000139496 | validated |
| tarbase | hsa-miR-222-3p  | NUP58    | 9818   | ENSG00000139496 | validated |
| tarbase | hsa-miR-301a-3p | NUP58    | 9818   | ENSG00000139496 | validated |
| tarbase | hsa-miR-301a-3p | MTMR6    | 9107   | ENSG00000139505 | validated |
| tarbase | hsa-miR-106b-5p | SLC7A1   | 6541   | ENSG00000139514 | validated |
| tarbase | hsa-miR-212-3p  | SLC7A1   | 6541   | ENSG00000139514 | validated |
| tarbase | hsa-miR-301a-3p | SLC7A1   | 6541   | ENSG00000139514 | validated |
| tarbase | hsa-miR-212-3p  | CCDC65   | 85478  | ENSG00000139537 | validated |
| tarbase | hsa-miR-192-5p  | TARBP2   | 6895   | ENSG00000139546 | validated |
| tarbase | hsa-miR-296-5p  | TARBP2   | 6895   | ENSG00000139546 | validated |
| tarbase | hsa-miR-15b-5p  | KANSL2   | 54934  | ENSG00000139620 | validated |
| tarbase | hsa-miR-18a-5p  | C12orf10 | 60314  | ENSG00000139637 | validated |
| tarbase | hsa-miR-301a-3p | C12orf10 | 60314  | ENSG00000139637 | validated |
| tarbase | hsa-miR-15b-5p  | TMBIM6   | 7009   | ENSG00000139644 | validated |
| tarbase | hsa-miR-18a-5p  | TMBIM6   | 7009   | ENSG00000139644 | validated |
| tarbase | hsa-miR-222-3p  | TMBIM6   | 7009   | ENSG00000139644 | validated |
| tarbase | hsa-miR-301a-3p | TMBIM6   | 7009   | ENSG00000139644 | validated |
| tarbase | hsa-miR-15b-5p  | ANKRD52  | 283373 | ENSG00000139645 | validated |
| tarbase | hsa-miR-181a-5p | ANKRD52  | 283373 | ENSG00000139645 | validated |
| tarbase | hsa-miR-18a-5p  | ANKRD52  | 283373 | ENSG00000139645 | validated |
| tarbase | hsa-miR-296-5p  | ANKRD52  | 283373 | ENSG00000139645 | validated |
| tarbase | hsa-miR-301a-3p | ANKRD52  | 283373 | ENSG00000139645 | validated |
| tarbase | hsa-miR-326     | ANKRD52  | 283373 | ENSG00000139645 | validated |
| tarbase | hsa-miR-582-5p  | ANKRD52  | 283373 | ENSG00000139645 | validated |
| tarbase | hsa-miR-582-5p  | ZNF740   | 283337 | ENSG00000139651 | validated |
| tarbase | hsa-miR-18a-5p  | ZNF740   | 283337 | ENSG00000139651 | validated |
| tarbase | hsa-miR-18a-5p  | ESD      | 2098   | ENSG00000139684 | validated |
| tarbase | hsa-miR-181a-5p | RB1      | 5925   | ENSG00000139687 | validated |
| tarbase | hsa-miR-18a-5p  | RB1      | 5925   | ENSG00000139687 | validated |
| tarbase | hsa-miR-301a-3p | RB1      | 5925   | ENSG00000139687 | validated |
| tarbase | hsa-miR-106b-5p | SBNO1    | 55206  | ENSG00000139697 | validated |
| tarbase | hsa-miR-181a-5p | SBNO1    | 55206  | ENSG00000139697 | validated |
| tarbase | hsa-miR-21-5p   | SBNO1    | 55206  | ENSG00000139697 | validated |
| tarbase | hsa-miR-18a-5p  | SETD1B   | 23067  | ENSG00000139718 | validated |
| tarbase | hsa-miR-212-3p  | SETD1B   | 23067  | ENSG00000139718 | validated |
| tarbase | hsa-miR-505-3p  | SETD1B   | 23067  | ENSG00000139718 | validated |
| tarbase | hsa-miR-181a-5p | DENR     | 8562   | ENSG00000139726 | validated |
| tarbase | hsa-miR-106b-5p | SLAIN1   | 122060 | ENSG00000139737 | validated |
| tarbase | hsa-miR-301a-3p | SLAIN1   | 122060 | ENSG00000139737 | validated |
| tarbase | hsa-miR-106b-5p | RBM26    | 64062  | ENSG00000139746 | validated |
| tarbase | hsa-miR-15b-5p  | RBM26    | 64062  | ENSG00000139746 | validated |
| tarbase | hsa-miR-181a-5p | RBM26    | 64062  | ENSG00000139746 | validated |
| tarbase | hsa-miR-18a-5p  | RBM26    | 64062  | ENSG00000139746 | validated |
| tarbase | hsa-miR-326     | RBM26    | 64062  | ENSG00000139746 | validated |
| tarbase | hsa-miR-582-3p  | RBM26    | 64062  | ENSG00000139746 | validated |
| tarbase | hsa-miR-15b-5p  | MBNL2    | 10150  | ENSG00000139793 | validated |
| tarbase | hsa-miR-18a-5p  | MBNL2    | 10150  | ENSG00000139793 | validated |
| tarbase | hsa-miR-582-5p  | MBNL2    | 10150  | ENSG00000139793 | validated |
| tarbase | hsa-miR-181a-5p | MBNL2    | 10150  | ENSG00000139793 | validated |
| tarbase | hsa-miR-106b-5p | ZIC5     | 85416  | ENSG00000139800 | validated |
| tarbase | hsa-miR-15b-5p  | ZIC5     | 85416  | ENSG00000139800 | validated |
| tarbase | hsa-miR-181a-5p | ZIC5     | 85416  | ENSG00000139800 | validated |
| tarbase | hsa-miR-106b-5p | ABHD13   | 84945  | ENSG00000139826 | validated |
| tarbase | hsa-miR-181a-5p | ABHD13   | 84945  | ENSG00000139826 | validated |
| tarbase | hsa-miR-18a-5p  | ABHD13   | 84945  | ENSG00000139826 | validated |
| tarbase | hsa-miR-15b-5p  | ABHD13   | 84945  | ENSG00000139826 | validated |

|         |                 |            |        |                 |           |
|---------|-----------------|------------|--------|-----------------|-----------|
| tarbase | hsa-miR-181a-5p | NOVA1      | 4857   | ENSG00000139910 | validated |
| tarbase | hsa-miR-15b-5p  | FITM1      | 161247 | ENSG00000139914 | validated |
| tarbase | hsa-miR-181a-5p | TMX1       | 81542  | ENSG00000139921 | validated |
| tarbase | hsa-miR-21-5p   | TMX1       | 81542  | ENSG00000139921 | validated |
| tarbase | hsa-miR-505-3p  | TMX1       | 81542  | ENSG00000139921 | validated |
| tarbase | hsa-miR-181a-5p | FRMD6      | 122786 | ENSG00000139926 | validated |
| tarbase | hsa-miR-301a-3p | FRMD6      | 122786 | ENSG00000139926 | validated |
| tarbase | hsa-miR-212-3p  | FRMD6      | 122786 | ENSG00000139926 | validated |
| tarbase | hsa-miR-15b-5p  | PELI2      | 57161  | ENSG00000139946 | validated |
| tarbase | hsa-miR-181a-5p | PELI2      | 57161  | ENSG00000139946 | validated |
| tarbase | hsa-miR-18a-5p  | SYT16      | 83851  | ENSG00000139973 | validated |
| tarbase | hsa-miR-181a-5p | SYT16      | 83851  | ENSG00000139973 | validated |
| tarbase | hsa-miR-212-3p  | SLC38A6    | 145389 | ENSG00000139974 | validated |
| tarbase | hsa-miR-106b-5p | NAA30      | 122830 | ENSG00000139977 | validated |
| tarbase | hsa-miR-181a-5p | NAA30      | 122830 | ENSG00000139977 | validated |
| tarbase | hsa-miR-301a-3p | NAA30      | 122830 | ENSG00000139977 | validated |
| tarbase | hsa-miR-15b-5p  | WDR89      | 112840 | ENSG00000140006 | validated |
| tarbase | hsa-miR-301a-3p | STON2      | 85439  | ENSG00000140022 | validated |
| tarbase | hsa-miR-326     | FBLN5      | 10516  | ENSG00000140092 | validated |
| tarbase | hsa-miR-21-5p   | WARS1      | 7453   | ENSG00000140105 | validated |
| tarbase | hsa-miR-144-3p  | WDR20      | 91833  | ENSG00000140153 | validated |
| tarbase | hsa-miR-181a-5p | WDR20      | 91833  | ENSG00000140153 | validated |
| tarbase | hsa-miR-301a-3p | WDR20      | 91833  | ENSG00000140153 | validated |
| tarbase | hsa-miR-582-5p  | WDR20      | 91833  | ENSG00000140153 | validated |
| tarbase | hsa-miR-181a-5p | NIPA2      | 81614  | ENSG00000140157 | validated |
| tarbase | hsa-miR-18a-5p  | NIPA2      | 81614  | ENSG00000140157 | validated |
| tarbase | hsa-miR-15b-5p  | MFAP1      | 4236   | ENSG00000140259 | validated |
| tarbase | hsa-miR-18a-5p  | MFAP1      | 4236   | ENSG00000140259 | validated |
| tarbase | hsa-miR-15b-5p  | TCF12      | 6938   | ENSG00000140262 | validated |
| tarbase | hsa-miR-222-3p  | TCF12      | 6938   | ENSG00000140262 | validated |
| tarbase | hsa-miR-582-5p  | ZSCAN29    | 146050 | ENSG00000140265 | validated |
| tarbase | hsa-miR-181a-5p | ZSCAN29    | 146050 | ENSG00000140265 | validated |
| tarbase | hsa-miR-181a-5p | BNIP2      | 663    | ENSG00000140299 | validated |
| tarbase | hsa-miR-192-5p  | BNIP2      | 663    | ENSG00000140299 | validated |
| tarbase | hsa-miR-18a-5p  | BNIP2      | 663    | ENSG00000140299 | validated |
| tarbase | hsa-miR-18a-5p  | SRP14      | 6727   | ENSG00000140319 | validated |
| tarbase | hsa-miR-296-5p  | BAHD1      | 22893  | ENSG00000140320 | validated |
| tarbase | hsa-miR-296-5p  | TLE3       | 7090   | ENSG00000140332 | validated |
| tarbase | hsa-miR-181a-5p | ANP32A     | 8125   | ENSG00000140350 | validated |
| tarbase | hsa-miR-582-5p  | ANP32A     | 8125   | ENSG00000140350 | validated |
| tarbase | hsa-miR-18a-5p  | UBE2Q2     | 92912  | ENSG00000140367 | validated |
| tarbase | hsa-miR-212-3p  | PSTPIP1    | 9051   | ENSG00000140368 | validated |
| tarbase | hsa-miR-181a-5p | NCOA2      | 10499  | ENSG00000140396 | validated |
| tarbase | hsa-miR-212-3p  | NCOA2      | 10499  | ENSG00000140396 | validated |
| tarbase | hsa-miR-21-5p   | NCOA2      | 10499  | ENSG00000140396 | validated |
| tarbase | hsa-miR-582-3p  | NCOA2      | 10499  | ENSG00000140396 | validated |
| tarbase | hsa-miR-181a-5p | DNAJA4     | 55466  | ENSG00000140403 | validated |
| tarbase | hsa-miR-296-5p  | TLNRD1     | 59274  | ENSG00000140406 | validated |
| tarbase | hsa-miR-106b-5p | IGF1R      | 3480   | ENSG00000140443 | validated |
| tarbase | hsa-miR-15b-5p  | IGF1R      | 3480   | ENSG00000140443 | validated |
| tarbase | hsa-miR-181a-5p | IGF1R      | 3480   | ENSG00000140443 | validated |
| tarbase | hsa-miR-505-3p  | IGF1R      | 3480   | ENSG00000140443 | validated |
| tarbase | hsa-miR-144-3p  | ARRDC4     | 91947  | ENSG00000140450 | validated |
| tarbase | hsa-miR-15b-5p  | ARRDC4     | 91947  | ENSG00000140450 | validated |
| tarbase | hsa-miR-15b-5p  | PIF1       | 80119  | ENSG00000140451 | validated |
| tarbase | hsa-miR-212-3p  | PIF1       | 80119  | ENSG00000140451 | validated |
| tarbase | hsa-miR-582-3p  | USP3       | 9960   | ENSG00000140455 | validated |
| tarbase | hsa-miR-582-5p  | USP3       | 9960   | ENSG00000140455 | validated |
| tarbase | hsa-miR-212-3p  | BBS4       | 585    | ENSG00000140463 | validated |
| tarbase | hsa-miR-15b-5p  | PML        | 5371   | ENSG00000140464 | validated |
| tarbase | hsa-miR-212-3p  | CYP1A1     | 1543   | ENSG00000140465 | validated |
| tarbase | hsa-miR-106b-5p | LINS1      | 55180  | ENSG00000140471 | validated |
| tarbase | hsa-miR-222-3p  | AC091230.1 | 25989  | ENSG00000140474 | validated |
| tarbase | hsa-miR-21-5p   | PCSK6      | 5046   | ENSG00000140479 | validated |
| tarbase | hsa-miR-15b-5p  | SCAMP2     | 10066  | ENSG00000140497 | validated |
| tarbase | hsa-miR-301a-3p | SCAMP2     | 10066  | ENSG00000140497 | validated |
| tarbase | hsa-miR-106b-5p | FANCI      | 55215  | ENSG00000140525 | validated |
| tarbase | hsa-miR-21-5p   | ABHD2      | 11057  | ENSG00000140526 | validated |
| tarbase | hsa-miR-212-3p  | WDR93      | 56964  | ENSG00000140527 | validated |
| tarbase | hsa-miR-181a-5p | TICRR      | 90381  | ENSG00000140534 | validated |
| tarbase | hsa-miR-106b-5p | FURIN      | 5045   | ENSG00000140564 | validated |



|         |                 |          |        |                 |           |
|---------|-----------------|----------|--------|-----------------|-----------|
| tarbase | hsa-miR-181a-5p | FURIN    | 5045   | ENSG00000140564 | validated |
| tarbase | hsa-miR-106b-5p | IQGAP1   | 8826   | ENSG00000140575 | validated |
| tarbase | hsa-miR-21-5p   | IQGAP1   | 8826   | ENSG00000140575 | validated |
| tarbase | hsa-miR-181a-5p | GLYR1    | 84656  | ENSG00000140632 | validated |
| tarbase | hsa-miR-18a-5p  | GLYR1    | 84656  | ENSG00000140632 | validated |
| tarbase | hsa-miR-296-5p  | GLYR1    | 84656  | ENSG00000140632 | validated |
| tarbase | hsa-miR-301a-3p | GLYR1    | 84656  | ENSG00000140632 | validated |
| tarbase | hsa-miR-505-3p  | GLYR1    | 84656  | ENSG00000140632 | validated |
| tarbase | hsa-miR-106b-5p | PMM2     | 5373   | ENSG00000140650 | validated |
| tarbase | hsa-miR-18a-5p  | TGFB11   | 7041   | ENSG00000140682 | validated |
| tarbase | hsa-miR-106b-5p | CDR2     | 1039   | ENSG00000140743 | validated |
| tarbase | hsa-miR-181a-5p | ARHGAP17 | 55114  | ENSG00000140750 | validated |
| tarbase | hsa-miR-21-5p   | DHX38    | 9785   | ENSG00000140829 | validated |
| tarbase | hsa-miR-106b-5p | ZFH3     | 463    | ENSG00000140836 | validated |
| tarbase | hsa-miR-15b-5p  | ZFH3     | 463    | ENSG00000140836 | validated |
| tarbase | hsa-miR-21-5p   | ZFH3     | 463    | ENSG00000140836 | validated |
| tarbase | hsa-miR-222-3p  | ZFH3     | 463    | ENSG00000140836 | validated |
| tarbase | hsa-miR-582-3p  | ZFH3     | 463    | ENSG00000140836 | validated |
| tarbase | hsa-miR-181a-5p | CPNE2    | 221184 | ENSG00000140848 | validated |
| tarbase | hsa-miR-212-3p  | NLRC5    | 84166  | ENSG00000140853 | validated |
| tarbase | hsa-miR-15b-5p  | CMTM3    | 123920 | ENSG00000140931 | validated |
| tarbase | hsa-miR-106b-5p | MAP1LC3B | 81631  | ENSG00000140941 | validated |
| tarbase | hsa-miR-106b-5p | MBTPS1   | 8720   | ENSG00000140943 | validated |
| tarbase | hsa-miR-181a-5p | ZCCHC14  | 23174  | ENSG00000140948 | validated |
| tarbase | hsa-miR-18a-5p  | ZCCHC14  | 23174  | ENSG00000140948 | validated |
| tarbase | hsa-miR-222-3p  | ZCCHC14  | 23174  | ENSG00000140948 | validated |
| tarbase | hsa-miR-301a-3p | ZCCHC14  | 23174  | ENSG00000140948 | validated |
| tarbase | hsa-miR-582-5p  | ZCCHC14  | 23174  | ENSG00000140948 | validated |
| tarbase | hsa-miR-21-5p   | MEAK7    | 57707  | ENSG00000140950 | validated |
| tarbase | hsa-miR-181a-5p | IRF8     | 3394   | ENSG00000140968 | validated |
| tarbase | hsa-miR-582-3p  | RHOT2    | 89941  | ENSG00000140983 | validated |
| tarbase | hsa-miR-212-3p  | NDUFB10  | 4716   | ENSG00000140990 | validated |
| tarbase | hsa-miR-181a-5p | PDPK1    | 5170   | ENSG00000140992 | validated |
| tarbase | hsa-miR-106b-5p | DEF8     | 54849  | ENSG00000140995 | validated |
| tarbase | hsa-miR-181a-5p | NCOR1    | 9611   | ENSG00000141027 | validated |
| tarbase | hsa-miR-21-5p   | NCOR1    | 9611   | ENSG00000141027 | validated |
| tarbase | hsa-miR-301a-3p | NCOR1    | 9611   | ENSG00000141027 | validated |
| tarbase | hsa-miR-582-3p  | NCOR1    | 9611   | ENSG00000141027 | validated |
| tarbase | hsa-miR-106b-5p | COPS3    | 8533   | ENSG00000141030 | validated |
| tarbase | hsa-miR-192-5p  | COPS3    | 8533   | ENSG00000141030 | validated |
| tarbase | hsa-miR-18a-5p  | ZNF287   | 57336  | ENSG00000141040 | validated |
| tarbase | hsa-miR-296-5p  | CTRL     | 1506   | ENSG00000141086 | validated |
| tarbase | hsa-miR-15b-5p  | NOB1     | 28987  | ENSG00000141101 | validated |
| tarbase | hsa-miR-15b-5p  | UNC45B   | 146862 | ENSG00000141161 | validated |
| tarbase | hsa-miR-106b-5p | PCTP     | 58488  | ENSG00000141179 | validated |
| tarbase | hsa-miR-18a-5p  | PCTP     | 58488  | ENSG00000141179 | validated |
| tarbase | hsa-miR-212-3p  | PCTP     | 58488  | ENSG00000141179 | validated |
| tarbase | hsa-miR-181a-5p | TOM1L1   | 10040  | ENSG00000141198 | validated |
| tarbase | hsa-miR-106b-5p | TOB1     | 10140  | ENSG00000141232 | validated |
| tarbase | hsa-miR-181a-5p | TOB1     | 10140  | ENSG00000141232 | validated |
| tarbase | hsa-miR-301a-3p | TOB1     | 10140  | ENSG00000141232 | validated |
| tarbase | hsa-miR-106b-5p | NPEPPS   | 9520   | ENSG00000141279 | validated |
| tarbase | hsa-miR-15b-5p  | NPEPPS   | 9520   | ENSG00000141279 | validated |
| tarbase | hsa-miR-212-3p  | LRRC46   | 90506  | ENSG00000141294 | validated |
| tarbase | hsa-miR-212-3p  | SSH2     | 85464  | ENSG00000141298 | validated |
| tarbase | hsa-miR-181a-5p | SSH2     | 85464  | ENSG00000141298 | validated |
| tarbase | hsa-miR-15b-5p  | CLTC     | 1213   | ENSG00000141367 | validated |
| tarbase | hsa-miR-181a-5p | CLTC     | 1213   | ENSG00000141367 | validated |
| tarbase | hsa-miR-18a-5p  | CLTC     | 1213   | ENSG00000141367 | validated |
| tarbase | hsa-miR-192-5p  | CLTC     | 1213   | ENSG00000141367 | validated |
| tarbase | hsa-miR-21-5p   | CLTC     | 1213   | ENSG00000141367 | validated |
| tarbase | hsa-miR-301a-3p | CLTC     | 1213   | ENSG00000141367 | validated |
| tarbase | hsa-miR-212-3p  | C17orf64 | 124773 | ENSG00000141371 | validated |
| tarbase | hsa-miR-301a-3p | SS18     | 6760   | ENSG00000141380 | validated |
| tarbase | hsa-miR-326     | AFG3L2   | 10939  | ENSG00000141385 | validated |
| tarbase | hsa-miR-181a-5p | AFG3L2   | 10939  | ENSG00000141385 | validated |
| tarbase | hsa-miR-106b-5p | SLC39A6  | 25800  | ENSG00000141424 | validated |
| tarbase | hsa-miR-181a-5p | SLC39A6  | 25800  | ENSG00000141424 | validated |
| tarbase | hsa-miR-222-3p  | SLC39A6  | 25800  | ENSG00000141424 | validated |
| tarbase | hsa-miR-181a-5p | RPRD1A   | 55197  | ENSG00000141425 | validated |
| tarbase | hsa-miR-181a-5p | C18orf21 | 83608  | ENSG00000141428 | validated |

|         |                 |          |        |                 |           |
|---------|-----------------|----------|--------|-----------------|-----------|
| tarbase | hsa-miR-18a-5p  | GALNT1   | 2589   | ENSG00000141429 | validated |
| tarbase | hsa-miR-582-5p  | GALNT1   | 2589   | ENSG00000141429 | validated |
| tarbase | hsa-miR-222-3p  | ASXL3    | 80816  | ENSG00000141431 | validated |
| tarbase | hsa-miR-296-5p  | ASXL3    | 80816  | ENSG00000141431 | validated |
| tarbase | hsa-miR-212-3p  | ASXL3    | 80816  | ENSG00000141431 | validated |
| tarbase | hsa-miR-15b-5p  | GAREM1   | 64762  | ENSG00000141441 | validated |
| tarbase | hsa-miR-301a-3p | GAREM1   | 64762  | ENSG00000141441 | validated |
| tarbase | hsa-miR-181a-5p | OSBPL1A  | 114876 | ENSG00000141447 | validated |
| tarbase | hsa-miR-144-3p  | GREB1L   | 80000  | ENSG00000141449 | validated |
| tarbase | hsa-miR-181a-5p | GREB1L   | 80000  | ENSG00000141449 | validated |
| tarbase | hsa-miR-212-3p  | GREB1L   | 80000  | ENSG00000141449 | validated |
| tarbase | hsa-miR-505-3p  | GREB1L   | 80000  | ENSG00000141449 | validated |
| tarbase | hsa-miR-582-5p  | GREB1L   | 80000  | ENSG00000141449 | validated |
| tarbase | hsa-miR-181a-5p | PELP1    | 27043  | ENSG00000141456 | validated |
| tarbase | hsa-miR-296-5p  | SLC13A5  | 284111 | ENSG00000141485 | validated |
| tarbase | hsa-miR-212-3p  | SLC13A5  | 284111 | ENSG00000141485 | validated |
| tarbase | hsa-miR-181a-5p | MINK1    | 50488  | ENSG00000141503 | validated |
| tarbase | hsa-miR-296-5p  | MINK1    | 50488  | ENSG00000141503 | validated |
| tarbase | hsa-miR-301a-3p | MINK1    | 50488  | ENSG00000141503 | validated |
| tarbase | hsa-miR-15b-5p  | ASGR1    | 432    | ENSG00000141505 | validated |
| tarbase | hsa-miR-181a-5p | TP53     | 7157   | ENSG00000141510 | validated |
| tarbase | hsa-miR-212-3p  | TP53     | 7157   | ENSG00000141510 | validated |
| tarbase | hsa-miR-21-5p   | ARHGDI A | 396    | ENSG00000141522 | validated |
| tarbase | hsa-miR-296-5p  | ARHGDI A | 396    | ENSG00000141522 | validated |
| tarbase | hsa-miR-326     | ARHGDI A | 396    | ENSG00000141522 | validated |
| tarbase | hsa-miR-181a-5p | SLC16A3  | 9123   | ENSG00000141526 | validated |
| tarbase | hsa-miR-296-5p  | CARD14   | 79092  | ENSG00000141527 | validated |
| tarbase | hsa-miR-181a-5p | RAB40B   | 10966  | ENSG00000141542 | validated |
| tarbase | hsa-miR-106b-5p | CSNK1D   | 1453   | ENSG00000141551 | validated |
| tarbase | hsa-miR-301a-3p | CSNK1D   | 1453   | ENSG00000141551 | validated |
| tarbase | hsa-miR-326     | CSNK1D   | 1453   | ENSG00000141551 | validated |
| tarbase | hsa-miR-106b-5p | ANAPC11  | 51529  | ENSG00000141552 | validated |
| tarbase | hsa-miR-15b-5p  | NARF     | 26502  | ENSG00000141562 | validated |
| tarbase | hsa-miR-106b-5p | NARF     | 26502  | ENSG00000141562 | validated |
| tarbase | hsa-miR-181a-5p | FO XK2   | 3607   | ENSG00000141568 | validated |
| tarbase | hsa-miR-18a-5p  | FO XK2   | 3607   | ENSG00000141568 | validated |
| tarbase | hsa-miR-212-3p  | TRIM65   | 201292 | ENSG00000141569 | validated |
| tarbase | hsa-miR-296-5p  | TRIM65   | 201292 | ENSG00000141569 | validated |
| tarbase | hsa-miR-106b-5p | ZCCHC2   | 54877  | ENSG00000141664 | validated |
| tarbase | hsa-miR-15b-5p  | ZCCHC2   | 54877  | ENSG00000141664 | validated |
| tarbase | hsa-miR-181a-5p | ZCCHC2   | 54877  | ENSG00000141664 | validated |
| tarbase | hsa-miR-15b-5p  | CBLN2    | 147381 | ENSG00000141668 | validated |
| tarbase | hsa-miR-212-3p  | PMAIP1   | 5366   | ENSG00000141682 | validated |
| tarbase | hsa-miR-222-3p  | PMAIP1   | 5366   | ENSG00000141682 | validated |
| tarbase | hsa-miR-18a-5p  | PMAIP1   | 5366   | ENSG00000141682 | validated |
| tarbase | hsa-miR-106b-5p | RETREG3  | 162427 | ENSG00000141699 | validated |
| tarbase | hsa-miR-222-3p  | RETREG3  | 162427 | ENSG00000141699 | validated |
| tarbase | hsa-miR-181a-5p | IGFBP4   | 3487   | ENSG00000141753 | validated |
| tarbase | hsa-miR-18a-5p  | IGFBP4   | 3487   | ENSG00000141753 | validated |
| tarbase | hsa-miR-222-3p  | IGFBP4   | 3487   | ENSG00000141753 | validated |
| tarbase | hsa-miR-21-5p   | TXNL4A   | 10907  | ENSG00000141759 | validated |
| tarbase | hsa-miR-181a-5p | MISP3    | 113230 | ENSG00000141854 | validated |
| tarbase | hsa-miR-301a-3p | BRD4     | 23476  | ENSG00000141867 | validated |
| tarbase | hsa-miR-505-3p  | BRD4     | 23476  | ENSG00000141867 | validated |
| tarbase | hsa-miR-15b-5p  | SLC39A3  | 29985  | ENSG00000141873 | validated |
| tarbase | hsa-miR-106b-5p | NFIC     | 4782   | ENSG00000141905 | validated |
| tarbase | hsa-miR-18a-5p  | NFIC     | 4782   | ENSG00000141905 | validated |
| tarbase | hsa-miR-222-3p  | NFIC     | 4782   | ENSG00000141905 | validated |
| tarbase | hsa-miR-296-5p  | PFKL     | 5211   | ENSG00000141959 | validated |
| tarbase | hsa-miR-301a-3p | PFKL     | 5211   | ENSG00000141959 | validated |
| tarbase | hsa-miR-296-5p  | FEM1A    | 55527  | ENSG00000141965 | validated |
| tarbase | hsa-miR-192-5p  | DPP9     | 91039  | ENSG00000142002 | validated |
| tarbase | hsa-miR-181a-5p | ZFP14    | 57677  | ENSG00000142065 | validated |
| tarbase | hsa-miR-106b-5p | IFITM3   | 10410  | ENSG00000142089 | validated |
| tarbase | hsa-miR-212-3p  | IFITM3   | 10410  | ENSG00000142089 | validated |
| tarbase | hsa-miR-296-5p  | PGGHG    | 80162  | ENSG00000142102 | validated |
| tarbase | hsa-miR-21-5p   | SOD1     | 6647   | ENSG00000142168 | validated |
| tarbase | hsa-miR-582-5p  | SOD1     | 6647   | ENSG00000142168 | validated |
| tarbase | hsa-miR-296-5p  | SIK1     | 150094 | ENSG00000142178 | validated |
| tarbase | hsa-miR-582-3p  | SIK1     | 150094 | ENSG00000142178 | validated |
| tarbase | hsa-miR-18a-5p  | SIK1     | 150094 | ENSG00000142178 | validated |

|         |                 |          |        |                 |           |
|---------|-----------------|----------|--------|-----------------|-----------|
| tarbase | hsa-miR-212-3p  | DNMT3L   | 29947  | ENSG00000142182 | validated |
| tarbase | hsa-miR-15b-5p  | SCYL1    | 57410  | ENSG00000142186 | validated |
| tarbase | hsa-miR-301a-3p | TMEM50B  | 757    | ENSG00000142188 | validated |
| tarbase | hsa-miR-181a-5p | APP      | 351    | ENSG00000142192 | validated |
| tarbase | hsa-miR-15b-5p  | DOP1B    | 9980   | ENSG00000142197 | validated |
| tarbase | hsa-miR-181a-5p | URB1     | 9875   | ENSG00000142207 | validated |
| tarbase | hsa-miR-106b-5p | AKT1     | 207    | ENSG00000142208 | validated |
| tarbase | hsa-miR-18a-5p  | SAE1     | 10055  | ENSG00000142230 | validated |
| tarbase | hsa-miR-582-3p  | GEMIN7   | 79760  | ENSG00000142252 | validated |
| tarbase | hsa-miR-18a-5p  | CARM1    | 10498  | ENSG00000142453 | validated |
| tarbase | hsa-miR-222-3p  | CARM1    | 10498  | ENSG00000142453 | validated |
| tarbase | hsa-miR-106b-5p | PSMB6    | 5694   | ENSG00000142507 | validated |
| tarbase | hsa-miR-106b-5p | ZNF473   | 25888  | ENSG00000142528 | validated |
| tarbase | hsa-miR-582-5p  | ZNF473   | 25888  | ENSG00000142528 | validated |
| tarbase | hsa-miR-106b-5p | RPS11    | 6205   | ENSG00000142534 | validated |
| tarbase | hsa-miR-301a-3p | RPS11    | 6205   | ENSG00000142534 | validated |
| tarbase | hsa-miR-301a-3p | RPL13A   | 23521  | ENSG00000142541 | validated |
| tarbase | hsa-miR-582-5p  | CTU1     | 90353  | ENSG00000142544 | validated |
| tarbase | hsa-miR-106b-5p | ZNF614   | 80110  | ENSG00000142556 | validated |
| tarbase | hsa-miR-301a-3p | ZNF614   | 80110  | ENSG00000142556 | validated |
| tarbase | hsa-miR-505-3p  | ZNF614   | 80110  | ENSG00000142556 | validated |
| tarbase | hsa-miR-21-5p   | RERE     | 473    | ENSG00000142599 | validated |
| tarbase | hsa-miR-21-5p   | EPHA2    | 1969   | ENSG00000142627 | validated |
| tarbase | hsa-miR-21-5p   | EFHD2    | 79180  | ENSG00000142634 | validated |
| tarbase | hsa-miR-212-3p  | RPL11    | 6135   | ENSG00000142676 | validated |
| tarbase | hsa-miR-212-3p  | C1orf216 | 127703 | ENSG00000142686 | validated |
| tarbase | hsa-miR-15b-5p  | HSPG2    | 3339   | ENSG00000142798 | validated |
| tarbase | hsa-miR-106b-5p | SERBP1   | 26135  | ENSG00000142864 | validated |
| tarbase | hsa-miR-222-3p  | SERBP1   | 26135  | ENSG00000142864 | validated |
| tarbase | hsa-miR-301a-3p | SERBP1   | 26135  | ENSG00000142864 | validated |
| tarbase | hsa-miR-106b-5p | BCL10    | 8915   | ENSG00000142867 | validated |
| tarbase | hsa-miR-212-3p  | BCL10    | 8915   | ENSG00000142867 | validated |
| tarbase | hsa-miR-181a-5p | CCN1     | 3491   | ENSG00000142871 | validated |
| tarbase | hsa-miR-222-3p  | CCN1     | 3491   | ENSG00000142871 | validated |
| tarbase | hsa-miR-106b-5p | KIF2C    | 11004  | ENSG00000142945 | validated |
| tarbase | hsa-miR-15b-5p  | KIF2C    | 11004  | ENSG00000142945 | validated |
| tarbase | hsa-miR-301a-3p | KIF2C    | 11004  | ENSG00000142945 | validated |
| tarbase | hsa-miR-15b-5p  | PTPRF    | 5792   | ENSG00000142949 | validated |
| tarbase | hsa-miR-212-3p  | PTPRF    | 5792   | ENSG00000142949 | validated |
| tarbase | hsa-miR-326     | PTPRF    | 5792   | ENSG00000142949 | validated |
| tarbase | hsa-miR-326     | MOB3C    | 148932 | ENSG00000142961 | validated |
| tarbase | hsa-miR-15b-5p  | LMO4     | 8543   | ENSG00000143013 | validated |
| tarbase | hsa-miR-18a-5p  | LMO4     | 8543   | ENSG00000143013 | validated |
| tarbase | hsa-miR-21-5p   | LMO4     | 8543   | ENSG00000143013 | validated |
| tarbase | hsa-miR-326     | LMO4     | 8543   | ENSG00000143013 | validated |
| tarbase | hsa-miR-144-3p  | MTF2     | 22823  | ENSG00000143033 | validated |
| tarbase | hsa-miR-181a-5p | MTF2     | 22823  | ENSG00000143033 | validated |
| tarbase | hsa-miR-212-3p  | MTF2     | 22823  | ENSG00000143033 | validated |
| tarbase | hsa-miR-582-5p  | MTF2     | 22823  | ENSG00000143033 | validated |
| tarbase | hsa-miR-181a-5p | IGSF3    | 3321   | ENSG00000143061 | validated |
| tarbase | hsa-miR-15b-5p  | ZNF697   | 90874  | ENSG00000143067 | validated |
| tarbase | hsa-miR-181a-5p | ZNF697   | 90874  | ENSG00000143067 | validated |
| tarbase | hsa-miR-106b-5p | STRIP1   | 85369  | ENSG00000143093 | validated |
| tarbase | hsa-miR-15b-5p  | STRIP1   | 85369  | ENSG00000143093 | validated |
| tarbase | hsa-miR-212-3p  | C1orf162 | 128346 | ENSG00000143110 | validated |
| tarbase | hsa-miR-181a-5p | CELSR2   | 1952   | ENSG00000143126 | validated |
| tarbase | hsa-miR-18a-5p  | CELSR2   | 1952   | ENSG00000143126 | validated |
| tarbase | hsa-miR-222-3p  | CELSR2   | 1952   | ENSG00000143126 | validated |
| tarbase | hsa-miR-326     | CELSR2   | 1952   | ENSG00000143126 | validated |
| tarbase | hsa-miR-15b-5p  | CELSR2   | 1952   | ENSG00000143126 | validated |
| tarbase | hsa-miR-144-3p  | ATP1B1   | 481    | ENSG00000143153 | validated |
| tarbase | hsa-miR-15b-5p  | ATP1B1   | 481    | ENSG00000143153 | validated |
| tarbase | hsa-miR-181a-5p | ATP1B1   | 481    | ENSG00000143153 | validated |
| tarbase | hsa-miR-21-5p   | ATP1B1   | 481    | ENSG00000143153 | validated |
| tarbase | hsa-miR-582-5p  | ATP1B1   | 481    | ENSG00000143153 | validated |
| tarbase | hsa-miR-106b-5p | POGK     | 57645  | ENSG00000143157 | validated |
| tarbase | hsa-miR-21-5p   | POGK     | 57645  | ENSG00000143157 | validated |
| tarbase | hsa-miR-212-3p  | DCAF6    | 55827  | ENSG00000143164 | validated |
| tarbase | hsa-miR-212-3p  | RXRG     | 6258   | ENSG00000143171 | validated |
| tarbase | hsa-miR-192-5p  | UCK2     | 7371   | ENSG00000143179 | validated |
| tarbase | hsa-miR-106b-5p | POU2F1   | 5451   | ENSG00000143190 | validated |

|         |                 |          |        |                 |           |
|---------|-----------------|----------|--------|-----------------|-----------|
| tarbase | hsa-miR-18a-5p  | POU2F1   | 5451   | ENSG00000143190 | validated |
| tarbase | hsa-miR-582-5p  | POU2F1   | 5451   | ENSG00000143190 | validated |
| tarbase | hsa-miR-181a-5p | POU2F1   | 5451   | ENSG00000143190 | validated |
| tarbase | hsa-miR-15b-5p  | UFC1     | 51506  | ENSG00000143222 | validated |
| tarbase | hsa-miR-144-3p  | NUF2     | 83540  | ENSG00000143228 | validated |
| tarbase | hsa-miR-222-3p  | NUF2     | 83540  | ENSG00000143228 | validated |
| tarbase | hsa-miR-15b-5p  | RGS5     | 8490   | ENSG00000143248 | validated |
| tarbase | hsa-miR-582-3p  | SDHC     | 6391   | ENSG00000143252 | validated |
| tarbase | hsa-miR-15b-5p  | PFDN2    | 5202   | ENSG00000143256 | validated |
| tarbase | hsa-miR-181a-5p | PRCC     | 5546   | ENSG00000143294 | validated |
| tarbase | hsa-miR-301a-3p | RRNAD1   | 51093  | ENSG00000143303 | validated |
| tarbase | hsa-miR-106b-5p | MRPL24   | 79590  | ENSG00000143314 | validated |
| tarbase | hsa-miR-15b-5p  | ISG20L2  | 81875  | ENSG00000143319 | validated |
| tarbase | hsa-miR-301a-3p | ISG20L2  | 81875  | ENSG00000143319 | validated |
| tarbase | hsa-miR-326     | ISG20L2  | 81875  | ENSG00000143319 | validated |
| tarbase | hsa-miR-301a-3p | HDGF     | 3068   | ENSG00000143321 | validated |
| tarbase | hsa-miR-106b-5p | ABL2     | 27     | ENSG00000143322 | validated |
| tarbase | hsa-miR-181a-5p | ABL2     | 27     | ENSG00000143322 | validated |
| tarbase | hsa-miR-582-3p  | ABL2     | 27     | ENSG00000143322 | validated |
| tarbase | hsa-miR-582-3p  | XPR1     | 9213   | ENSG00000143324 | validated |
| tarbase | hsa-miR-181a-5p | TOR1AIP1 | 26092  | ENSG00000143337 | validated |
| tarbase | hsa-miR-212-3p  | HMCN1    | 83872  | ENSG00000143341 | validated |
| tarbase | hsa-miR-18a-5p  | LYPLAL1  | 127018 | ENSG00000143353 | validated |
| tarbase | hsa-miR-106b-5p | RORC     | 6097   | ENSG00000143365 | validated |
| tarbase | hsa-miR-212-3p  | TUFT1    | 7286   | ENSG00000143367 | validated |
| tarbase | hsa-miR-192-5p  | SNX27    | 81609  | ENSG00000143376 | validated |
| tarbase | hsa-miR-21-5p   | SNX27    | 81609  | ENSG00000143376 | validated |
| tarbase | hsa-miR-301a-3p | SNX27    | 81609  | ENSG00000143376 | validated |
| tarbase | hsa-miR-301a-3p | SETDB1   | 9869   | ENSG00000143379 | validated |
| tarbase | hsa-miR-15b-5p  | MCL1     | 4170   | ENSG00000143384 | validated |
| tarbase | hsa-miR-18a-5p  | MCL1     | 4170   | ENSG00000143384 | validated |
| tarbase | hsa-miR-505-3p  | MCL1     | 4170   | ENSG00000143384 | validated |
| tarbase | hsa-miR-582-3p  | MCL1     | 4170   | ENSG00000143384 | validated |
| tarbase | hsa-miR-212-3p  | RFX5     | 5993   | ENSG00000143390 | validated |
| tarbase | hsa-miR-582-3p  | RFX5     | 5993   | ENSG00000143390 | validated |
| tarbase | hsa-miR-296-5p  | PI4KB    | 5298   | ENSG00000143393 | validated |
| tarbase | hsa-miR-181a-5p | ANP32E   | 81611  | ENSG00000143401 | validated |
| tarbase | hsa-miR-21-5p   | CERS2    | 29956  | ENSG00000143418 | validated |
| tarbase | hsa-miR-106b-5p | CERS2    | 29956  | ENSG00000143418 | validated |
| tarbase | hsa-miR-15b-5p  | ENSA     | 2029   | ENSG00000143420 | validated |
| tarbase | hsa-miR-15b-5p  | SEMA6C   | 10500  | ENSG00000143434 | validated |
| tarbase | hsa-miR-181a-5p | ARNT     | 405    | ENSG00000143437 | validated |
| tarbase | hsa-miR-222-3p  | ARNT     | 405    | ENSG00000143437 | validated |
| tarbase | hsa-miR-181a-5p | POGZ     | 23126  | ENSG00000143442 | validated |
| tarbase | hsa-miR-18a-5p  | POGZ     | 23126  | ENSG00000143442 | validated |
| tarbase | hsa-miR-582-5p  | POGZ     | 23126  | ENSG00000143442 | validated |
| tarbase | hsa-miR-21-5p   | SYT14    | 255928 | ENSG00000143469 | validated |
| tarbase | hsa-miR-192-5p  | KCNH1    | 3756   | ENSG00000143473 | validated |
| tarbase | hsa-miR-106b-5p | DYRK3    | 8444   | ENSG00000143479 | validated |
| tarbase | hsa-miR-21-5p   | DYRK3    | 8444   | ENSG00000143479 | validated |
| tarbase | hsa-miR-106b-5p | VASH2    | 79805  | ENSG00000143494 | validated |
| tarbase | hsa-miR-181a-5p | TAF1A    | 9015   | ENSG00000143498 | validated |
| tarbase | hsa-miR-212-3p  | TAF1A    | 9015   | ENSG00000143498 | validated |
| tarbase | hsa-miR-301a-3p | SMYD2    | 56950  | ENSG00000143499 | validated |
| tarbase | hsa-miR-15b-5p  | SUSD4    | 55061  | ENSG00000143502 | validated |
| tarbase | hsa-miR-15b-5p  | ATP8B2   | 57198  | ENSG00000143515 | validated |
| tarbase | hsa-miR-181a-5p | ATP8B2   | 57198  | ENSG00000143515 | validated |
| tarbase | hsa-miR-212-3p  | RAB13    | 5872   | ENSG00000143545 | validated |
| tarbase | hsa-miR-21-5p   | SNAPIN   | 23557  | ENSG00000143553 | validated |
| tarbase | hsa-miR-15b-5p  | SLC27A3  | 11000  | ENSG00000143554 | validated |
| tarbase | hsa-miR-222-3p  | S100A7   | 6278   | ENSG00000143556 | validated |
| tarbase | hsa-miR-106b-5p | UBAP2L   | 9898   | ENSG00000143569 | validated |
| tarbase | hsa-miR-181a-5p | UBAP2L   | 9898   | ENSG00000143569 | validated |
| tarbase | hsa-miR-192-5p  | UBAP2L   | 9898   | ENSG00000143569 | validated |
| tarbase | hsa-miR-21-5p   | UBAP2L   | 9898   | ENSG00000143569 | validated |
| tarbase | hsa-miR-301a-3p | UBAP2L   | 9898   | ENSG00000143569 | validated |
| tarbase | hsa-miR-326     | SLC39A1  | 27173  | ENSG00000143570 | validated |
| tarbase | hsa-miR-582-3p  | SLC39A1  | 27173  | ENSG00000143570 | validated |
| tarbase | hsa-miR-21-5p   | HAX1     | 10456  | ENSG00000143575 | validated |
| tarbase | hsa-miR-106b-5p | EFNA3    | 1944   | ENSG00000143590 | validated |
| tarbase | hsa-miR-301a-3p | EFNA3    | 1944   | ENSG00000143590 | validated |

|         |                 |          |        |                 |           |
|---------|-----------------|----------|--------|-----------------|-----------|
| tarbase | hsa-miR-582-3p  | EFNA3    | 1944   | ENSG00000143590 | validated |
| tarbase | hsa-miR-181a-5p | C1orf43  | 25912  | ENSG00000143612 | validated |
| tarbase | hsa-miR-222-3p  | C1orf43  | 25912  | ENSG00000143612 | validated |
| tarbase | hsa-miR-15b-5p  | GATAD2B  | 57459  | ENSG00000143614 | validated |
| tarbase | hsa-miR-212-3p  | GATAD2B  | 57459  | ENSG00000143614 | validated |
| tarbase | hsa-miR-21-5p   | GATAD2B  | 57459  | ENSG00000143614 | validated |
| tarbase | hsa-miR-301a-3p | GATAD2B  | 57459  | ENSG00000143614 | validated |
| tarbase | hsa-miR-106b-5p | RIT1     | 6016   | ENSG00000143622 | validated |
| tarbase | hsa-miR-181a-5p | RIT1     | 6016   | ENSG00000143622 | validated |
| tarbase | hsa-miR-18a-5p  | RIT1     | 6016   | ENSG00000143622 | validated |
| tarbase | hsa-miR-181a-5p | INTS3    | 65123  | ENSG00000143624 | validated |
| tarbase | hsa-miR-181a-5p | C1orf131 | 128061 | ENSG00000143633 | validated |
| tarbase | hsa-miR-15b-5p  | GALNT2   | 2590   | ENSG00000143641 | validated |
| tarbase | hsa-miR-21-5p   | GALNT2   | 2590   | ENSG00000143641 | validated |
| tarbase | hsa-miR-106b-5p | LYST     | 1130   | ENSG00000143669 | validated |
| tarbase | hsa-miR-15b-5p  | MAP3K21  | 84451  | ENSG00000143674 | validated |
| tarbase | hsa-miR-181a-5p | MAP3K21  | 84451  | ENSG00000143674 | validated |
| tarbase | hsa-miR-18a-5p  | MAP3K21  | 84451  | ENSG00000143674 | validated |
| tarbase | hsa-miR-192-5p  | MAP3K21  | 84451  | ENSG00000143674 | validated |
| tarbase | hsa-miR-296-5p  | MAP3K21  | 84451  | ENSG00000143674 | validated |
| tarbase | hsa-miR-301a-3p | MAP3K21  | 84451  | ENSG00000143674 | validated |
| tarbase | hsa-miR-15b-5p  | CEP170   | 9859   | ENSG00000143702 | validated |
| tarbase | hsa-miR-21-5p   | CEP170   | 9859   | ENSG00000143702 | validated |
| tarbase | hsa-miR-222-3p  | CEP170   | 9859   | ENSG00000143702 | validated |
| tarbase | hsa-miR-15b-5p  | ACP1     | 52     | ENSG00000143727 | validated |
| tarbase | hsa-miR-212-3p  | SRP9     | 6726   | ENSG00000143742 | validated |
| tarbase | hsa-miR-106b-5p | SDE2     | 163859 | ENSG00000143751 | validated |
| tarbase | hsa-miR-582-3p  | SDE2     | 163859 | ENSG00000143751 | validated |
| tarbase | hsa-miR-181a-5p | SDE2     | 163859 | ENSG00000143751 | validated |
| tarbase | hsa-miR-181a-5p | DEGS1    | 8560   | ENSG00000143753 | validated |
| tarbase | hsa-miR-21-5p   | DEGS1    | 8560   | ENSG00000143753 | validated |
| tarbase | hsa-miR-222-3p  | DEGS1    | 8560   | ENSG00000143753 | validated |
| tarbase | hsa-miR-582-3p  | DEGS1    | 8560   | ENSG00000143753 | validated |
| tarbase | hsa-miR-106b-5p | FBXO28   | 23219  | ENSG00000143756 | validated |
| tarbase | hsa-miR-18a-5p  | FBXO28   | 23219  | ENSG00000143756 | validated |
| tarbase | hsa-miR-212-3p  | FBXO28   | 23219  | ENSG00000143756 | validated |
| tarbase | hsa-miR-15b-5p  | ARF1     | 375    | ENSG00000143761 | validated |
| tarbase | hsa-miR-212-3p  | ARF1     | 375    | ENSG00000143761 | validated |
| tarbase | hsa-miR-222-3p  | ARF1     | 375    | ENSG00000143761 | validated |
| tarbase | hsa-miR-301a-3p | ARF1     | 375    | ENSG00000143761 | validated |
| tarbase | hsa-miR-582-5p  | ARF1     | 375    | ENSG00000143761 | validated |
| tarbase | hsa-miR-106b-5p | CNIH4    | 29097  | ENSG00000143771 | validated |
| tarbase | hsa-miR-181a-5p | CDC42BPA | 8476   | ENSG00000143776 | validated |
| tarbase | hsa-miR-222-3p  | C1orf35  | 79169  | ENSG00000143793 | validated |
| tarbase | hsa-miR-106b-5p | MBOAT2   | 129642 | ENSG00000143797 | validated |
| tarbase | hsa-miR-181a-5p | MBOAT2   | 129642 | ENSG00000143797 | validated |
| tarbase | hsa-miR-301a-3p | PYCR2    | 29920  | ENSG00000143811 | validated |
| tarbase | hsa-miR-15b-5p  | LBR      | 3930   | ENSG00000143815 | validated |
| tarbase | hsa-miR-212-3p  | LBR      | 3930   | ENSG00000143815 | validated |
| tarbase | hsa-miR-582-5p  | LBR      | 3930   | ENSG00000143815 | validated |
| tarbase | hsa-miR-15b-5p  | WNT9A    | 7483   | ENSG00000143816 | validated |
| tarbase | hsa-miR-301a-3p | SOX13    | 9580   | ENSG00000143842 | validated |
| tarbase | hsa-miR-18a-5p  | PLEKHA6  | 22874  | ENSG00000143850 | validated |
| tarbase | hsa-miR-15b-5p  | ARL8A    | 127829 | ENSG00000143862 | validated |
| tarbase | hsa-miR-181a-5p | RHOB     | 388    | ENSG00000143878 | validated |
| tarbase | hsa-miR-582-5p  | RHOB     | 388    | ENSG00000143878 | validated |
| tarbase | hsa-miR-15b-5p  | HNRNPLL  | 92906  | ENSG00000143889 | validated |
| tarbase | hsa-miR-15b-5p  | EML4     | 27436  | ENSG00000143924 | validated |
| tarbase | hsa-miR-181a-5p | EML4     | 27436  | ENSG00000143924 | validated |
| tarbase | hsa-miR-181a-5p | CALM2    | 805    | ENSG00000143933 | validated |
| tarbase | hsa-miR-18a-5p  | CALM2    | 805    | ENSG00000143933 | validated |
| tarbase | hsa-miR-18a-5p  | CHAC2    | 494143 | ENSG00000143942 | validated |
| tarbase | hsa-miR-21-5p   | RPS27A   | 6233   | ENSG00000143947 | validated |
| tarbase | hsa-miR-181a-5p | RPS27A   | 6233   | ENSG00000143947 | validated |
| tarbase | hsa-miR-212-3p  | WDPCP    | 51057  | ENSG00000143951 | validated |
| tarbase | hsa-miR-212-3p  | REG3G    | 130120 | ENSG00000143954 | validated |
| tarbase | hsa-miR-106b-5p | ASXL2    | 55252  | ENSG00000143970 | validated |
| tarbase | hsa-miR-15b-5p  | ASXL2    | 55252  | ENSG00000143970 | validated |
| tarbase | hsa-miR-181a-5p | ASXL2    | 55252  | ENSG00000143970 | validated |
| tarbase | hsa-miR-212-3p  | ETAA1    | 54465  | ENSG00000143971 | validated |
| tarbase | hsa-miR-15b-5p  | MEIS1    | 4211   | ENSG00000143995 | validated |

|         |                 |          |        |                 |           |
|---------|-----------------|----------|--------|-----------------|-----------|
| tarbase | hsa-miR-212-3p  | MEIS1    | 4211   | ENSG00000143995 | validated |
| tarbase | hsa-miR-296-5p  | ZNF514   | 84874  | ENSG00000144026 | validated |
| tarbase | hsa-miR-15b-5p  | SNRNP200 | 23020  | ENSG00000144028 | validated |
| tarbase | hsa-miR-181a-5p | SNRNP200 | 23020  | ENSG00000144028 | validated |
| tarbase | hsa-miR-181a-5p | MRPS5    | 64969  | ENSG00000144029 | validated |
| tarbase | hsa-miR-15b-5p  | TEX261   | 113419 | ENSG00000144043 | validated |
| tarbase | hsa-miR-21-5p   | TEX261   | 113419 | ENSG00000144043 | validated |
| tarbase | hsa-miR-181a-5p | DUSP11   | 8446   | ENSG00000144048 | validated |
| tarbase | hsa-miR-582-5p  | TMEM177  | 80775  | ENSG00000144120 | validated |
| tarbase | hsa-miR-15b-5p  | SLC20A1  | 6574   | ENSG00000144136 | validated |
| tarbase | hsa-miR-181a-5p | SLC20A1  | 6574   | ENSG00000144136 | validated |
| tarbase | hsa-miR-212-3p  | SLC20A1  | 6574   | ENSG00000144136 | validated |
| tarbase | hsa-miR-222-3p  | SLC20A1  | 6574   | ENSG00000144136 | validated |
| tarbase | hsa-miR-301a-3p | SLC20A1  | 6574   | ENSG00000144136 | validated |
| tarbase | hsa-miR-106b-5p | LIPT1    | 51601  | ENSG00000144182 | validated |
| tarbase | hsa-miR-15b-5p  | LIPT1    | 51601  | ENSG00000144182 | validated |
| tarbase | hsa-miR-18a-5p  | LIPT1    | 51601  | ENSG00000144182 | validated |
| tarbase | hsa-miR-21-5p   | UBXN4    | 23190  | ENSG00000144224 | validated |
| tarbase | hsa-miR-326     | UBXN4    | 23190  | ENSG00000144224 | validated |
| tarbase | hsa-miR-582-5p  | UBXN4    | 23190  | ENSG00000144224 | validated |
| tarbase | hsa-miR-301a-3p | SPOPL    | 339745 | ENSG00000144228 | validated |
| tarbase | hsa-miR-15b-5p  | POLR2D   | 5433   | ENSG00000144231 | validated |
| tarbase | hsa-miR-106b-5p | AMMECR1L | 83607  | ENSG00000144233 | validated |
| tarbase | hsa-miR-106b-5p | PKP4     | 8502   | ENSG00000144283 | validated |
| tarbase | hsa-miR-106b-5p | SCN1A    | 6323   | ENSG00000144285 | validated |
| tarbase | hsa-miR-181a-5p | SLC4A10  | 57282  | ENSG00000144290 | validated |
| tarbase | hsa-miR-18a-5p  | SCRN3    | 79634  | ENSG00000144306 | validated |
| tarbase | hsa-miR-212-3p  | TMEFF2   | 23671  | ENSG00000144339 | validated |
| tarbase | hsa-miR-106b-5p | CDCA7    | 83879  | ENSG00000144354 | validated |
| tarbase | hsa-miR-106b-5p | UBR3     | 130507 | ENSG00000144357 | validated |
| tarbase | hsa-miR-181a-5p | UBR3     | 130507 | ENSG00000144357 | validated |
| tarbase | hsa-miR-21-5p   | PHOSPHO2 | 493911 | ENSG00000144362 | validated |
| tarbase | hsa-miR-15b-5p  | GULP1    | 51454  | ENSG00000144366 | validated |
| tarbase | hsa-miR-15b-5p  | FAM171B  | 165215 | ENSG00000144369 | validated |
| tarbase | hsa-miR-181a-5p | FAM171B  | 165215 | ENSG00000144369 | validated |
| tarbase | hsa-miR-144-3p  | HSPD1    | 3329   | ENSG00000144381 | validated |
| tarbase | hsa-miR-181a-5p | METTL21A | 151194 | ENSG00000144401 | validated |
| tarbase | hsa-miR-15b-5p  | UNC80    | 285175 | ENSG00000144406 | validated |
| tarbase | hsa-miR-181a-5p | UNC80    | 285175 | ENSG00000144406 | validated |
| tarbase | hsa-miR-212-3p  | CPO      | 130749 | ENSG00000144410 | validated |
| tarbase | hsa-miR-106b-5p | NBEAL1   | 65065  | ENSG00000144426 | validated |
| tarbase | hsa-miR-106b-5p | KANSL1L  | 151050 | ENSG00000144445 | validated |
| tarbase | hsa-miR-21-5p   | KANSL1L  | 151050 | ENSG00000144445 | validated |
| tarbase | hsa-miR-181a-5p | SUMF1    | 285362 | ENSG00000144455 | validated |
| tarbase | hsa-miR-21-5p   | SUMF1    | 285362 | ENSG00000144455 | validated |
| tarbase | hsa-miR-326     | NYAP2    | 57624  | ENSG00000144460 | validated |
| tarbase | hsa-miR-15b-5p  | RHBDD1   | 84236  | ENSG00000144468 | validated |
| tarbase | hsa-miR-181a-5p | RHBDD1   | 84236  | ENSG00000144468 | validated |
| tarbase | hsa-miR-15b-5p  | COPS7B   | 64708  | ENSG00000144524 | validated |
| tarbase | hsa-miR-181a-5p | COPS7B   | 64708  | ENSG00000144524 | validated |
| tarbase | hsa-miR-301a-3p | COPS7B   | 64708  | ENSG00000144524 | validated |
| tarbase | hsa-miR-326     | COPS7B   | 64708  | ENSG00000144524 | validated |
| tarbase | hsa-miR-15b-5p  | VGLL4    | 9686   | ENSG00000144560 | validated |
| tarbase | hsa-miR-18a-5p  | VGLL4    | 9686   | ENSG00000144560 | validated |
| tarbase | hsa-miR-301a-3p | VGLL4    | 9686   | ENSG00000144560 | validated |
| tarbase | hsa-miR-181a-5p | RAB5A    | 5868   | ENSG00000144566 | validated |
| tarbase | hsa-miR-192-5p  | RAB5A    | 5868   | ENSG00000144566 | validated |
| tarbase | hsa-miR-15b-5p  | RETREG2  | 79137  | ENSG00000144567 | validated |
| tarbase | hsa-miR-505-3p  | RETREG2  | 79137  | ENSG00000144567 | validated |
| tarbase | hsa-miR-106b-5p | RETREG2  | 79137  | ENSG00000144567 | validated |
| tarbase | hsa-miR-15b-5p  | CTDSP1   | 58190  | ENSG00000144579 | validated |
| tarbase | hsa-miR-18a-5p  | CTDSP1   | 58190  | ENSG00000144579 | validated |
| tarbase | hsa-miR-18a-5p  | CNOT9    | 9125   | ENSG00000144580 | validated |
| tarbase | hsa-miR-222-3p  | CNOT9    | 9125   | ENSG00000144580 | validated |
| tarbase | hsa-miR-582-5p  | CNOT9    | 9125   | ENSG00000144580 | validated |
| tarbase | hsa-miR-212-3p  | STK11IP  | 114790 | ENSG00000144589 | validated |
| tarbase | hsa-miR-181a-5p | EAF1     | 85403  | ENSG00000144597 | validated |
| tarbase | hsa-miR-222-3p  | EAF1     | 85403  | ENSG00000144597 | validated |
| tarbase | hsa-miR-212-3p  | GASK1A   | 729085 | ENSG00000144649 | validated |
| tarbase | hsa-miR-181a-5p | CSRNP1   | 64651  | ENSG00000144655 | validated |
| tarbase | hsa-miR-301a-3p | CSRNP1   | 64651  | ENSG00000144655 | validated |

|         |                 |         |           |                 |           |
|---------|-----------------|---------|-----------|-----------------|-----------|
| tarbase | hsa-miR-181a-5p | GOLGA4  | 2803      | ENSG00000144674 | validated |
| tarbase | hsa-miR-18a-5p  | GOLGA4  | 2803      | ENSG00000144674 | validated |
| tarbase | hsa-miR-326     | GOLGA4  | 2803      | ENSG00000144674 | validated |
| tarbase | hsa-miR-505-3p  | GOLGA4  | 2803      | ENSG00000144674 | validated |
| tarbase | hsa-miR-212-3p  | CTDSPL  | 10217     | ENSG00000144677 | validated |
| tarbase | hsa-miR-106b-5p | IL17RD  | 54756     | ENSG00000144730 | validated |
| tarbase | hsa-miR-582-5p  | IL17RD  | 54756     | ENSG00000144730 | validated |
| tarbase | hsa-miR-222-3p  | UBA3    | 9039      | ENSG00000144744 | validated |
| tarbase | hsa-miR-15b-5p  | ARL6IP5 | 10550     | ENSG00000144746 | validated |
| tarbase | hsa-miR-106b-5p | LRIG1   | 26018     | ENSG00000144749 | validated |
| tarbase | hsa-miR-15b-5p  | LRIG1   | 26018     | ENSG00000144749 | validated |
| tarbase | hsa-miR-301a-3p | LRIG1   | 26018     | ENSG00000144749 | validated |
| tarbase | hsa-miR-192-5p  | LIMD1   | 8994      | ENSG00000144791 | validated |
| tarbase | hsa-miR-21-5p   | NFKBIZ  | 64332     | ENSG00000144802 | validated |
| tarbase | hsa-miR-106b-5p | ABHD10  | 55347     | ENSG00000144827 | validated |
| tarbase | hsa-miR-222-3p  | ABHD10  | 55347     | ENSG00000144827 | validated |
| tarbase | hsa-miR-106b-5p | ATG3    | 64422     | ENSG00000144848 | validated |
| tarbase | hsa-miR-301a-3p | SRPRB   | 58477     | ENSG00000144867 | validated |
| tarbase | hsa-miR-106b-5p | MED12L  | 116931    | ENSG00000144893 | validated |
| tarbase | hsa-miR-18a-5p  | OSBPL11 | 114885    | ENSG00000144909 | validated |
| tarbase | hsa-miR-21-5p   | OSBPL11 | 114885    | ENSG00000144909 | validated |
| tarbase | hsa-miR-212-3p  | TRPC1   | 7220      | ENSG00000144935 | validated |
| tarbase | hsa-miR-21-5p   | NCEH1   | 57552     | ENSG00000144959 | validated |
| tarbase | hsa-miR-301a-3p | NCEH1   | 57552     | ENSG00000144959 | validated |
| tarbase | hsa-miR-212-3p  | NCEH1   | 57552     | ENSG00000144959 | validated |
| tarbase | hsa-miR-181a-5p | LPP     | 4026      | ENSG00000145012 | validated |
| tarbase | hsa-miR-21-5p   | LPP     | 4026      | ENSG00000145012 | validated |
| tarbase | hsa-miR-106b-5p | RUBCN   | 9711      | ENSG00000145016 | validated |
| tarbase | hsa-miR-21-5p   | CCDC39  |           | ENSG00000145075 | validated |
| tarbase | hsa-miR-15b-5p  | SLIT2   | 9353      | ENSG00000145147 | validated |
| tarbase | hsa-miR-21-5p   | SLIT2   | 9353      | ENSG00000145147 | validated |
| tarbase | hsa-miR-15b-5p  | EIF2B5  | 8893      | ENSG00000145191 | validated |
| tarbase | hsa-miR-106b-5p | SCD5    | 79966     | ENSG00000145284 | validated |
| tarbase | hsa-miR-181a-5p | SCD5    | 79966     | ENSG00000145284 | validated |
| tarbase | hsa-miR-212-3p  | TRMT10A | 93587     | ENSG00000145331 | validated |
| tarbase | hsa-miR-106b-5p | KLHL8   | 57563     | ENSG00000145332 | validated |
| tarbase | hsa-miR-21-5p   | KLHL8   | 57563     | ENSG00000145332 | validated |
| tarbase | hsa-miR-18a-5p  | SNCA    | 6622      | ENSG00000145335 | validated |
| tarbase | hsa-miR-106b-5p | PYURF   | 100996939 | ENSG00000145337 | validated |
| tarbase | hsa-miR-301a-3p | CAMK2D  | 817       | ENSG00000145349 | validated |
| tarbase | hsa-miR-181a-5p | CAMK2D  | 817       | ENSG00000145349 | validated |
| tarbase | hsa-miR-15b-5p  | ANK2    | 287       | ENSG00000145362 | validated |
| tarbase | hsa-miR-106b-5p | CCNA2   | 890       | ENSG00000145386 | validated |
| tarbase | hsa-miR-15b-5p  | CCNA2   | 890       | ENSG00000145386 | validated |
| tarbase | hsa-miR-18a-5p  | CCNA2   | 890       | ENSG00000145386 | validated |
| tarbase | hsa-miR-106b-5p | METTL14 | 57721     | ENSG00000145388 | validated |
| tarbase | hsa-miR-181a-5p | USP53   | 54532     | ENSG00000145390 | validated |
| tarbase | hsa-miR-181a-5p | SETD7   | 80854     | ENSG00000145391 | validated |
| tarbase | hsa-miR-15b-5p  | PDGFC   | 56034     | ENSG00000145431 | validated |
| tarbase | hsa-miR-15b-5p  | MARCHF6 | 10299     | ENSG00000145495 | validated |
| tarbase | hsa-miR-181a-5p | MARCHF6 | 10299     | ENSG00000145495 | validated |
| tarbase | hsa-miR-18a-5p  | MARCHF6 | 10299     | ENSG00000145495 | validated |
| tarbase | hsa-miR-21-5p   | MARCHF6 | 10299     | ENSG00000145495 | validated |
| tarbase | hsa-miR-582-5p  | MARCHF6 | 10299     | ENSG00000145495 | validated |
| tarbase | hsa-miR-106b-5p | MYO10   | 4651      | ENSG00000145555 | validated |
| tarbase | hsa-miR-181a-5p | MYO10   | 4651      | ENSG00000145555 | validated |
| tarbase | hsa-miR-296-5p  | MYO10   | 4651      | ENSG00000145555 | validated |
| tarbase | hsa-miR-505-3p  | MYO10   | 4651      | ENSG00000145555 | validated |
| tarbase | hsa-miR-106b-5p | OTULINL | 54491     | ENSG00000145569 | validated |
| tarbase | hsa-miR-582-5p  | OTULINL | 54491     | ENSG00000145569 | validated |
| tarbase | hsa-miR-301a-3p | SKP2    | 6502      | ENSG00000145604 | validated |
| tarbase | hsa-miR-582-5p  | SKP2    | 6502      | ENSG00000145604 | validated |
| tarbase | hsa-miR-301a-3p | OSMR    | 9180      | ENSG00000145623 | validated |
| tarbase | hsa-miR-106b-5p | PIK3R1  | 5295      | ENSG00000145675 | validated |
| tarbase | hsa-miR-181a-5p | PIK3R1  | 5295      | ENSG00000145675 | validated |
| tarbase | hsa-miR-212-3p  | PIK3R1  | 5295      | ENSG00000145675 | validated |
| tarbase | hsa-miR-181a-5p | LHFPL2  | 10184     | ENSG00000145685 | validated |
| tarbase | hsa-miR-212-3p  | LHFPL2  | 10184     | ENSG00000145685 | validated |
| tarbase | hsa-miR-222-3p  | LHFPL2  | 10184     | ENSG00000145685 | validated |
| tarbase | hsa-miR-181a-5p | SSBP2   | 23635     | ENSG00000145687 | validated |
| tarbase | hsa-miR-15b-5p  | RASA1   | 5921      | ENSG00000145715 | validated |

|         |                 |          |        |                 |           |
|---------|-----------------|----------|--------|-----------------|-----------|
| tarbase | hsa-miR-181a-5p | RASA1    | 5921   | ENSG00000145715 | validated |
| tarbase | hsa-miR-301a-3p | RASA1    | 5921   | ENSG00000145715 | validated |
| tarbase | hsa-miR-212-3p  | GIN1     | 54826  | ENSG00000145723 | validated |
| tarbase | hsa-miR-181a-5p | PPIP5K2  | 23262  | ENSG00000145725 | validated |
| tarbase | hsa-miR-212-3p  | PPIP5K2  | 23262  | ENSG00000145725 | validated |
| tarbase | hsa-miR-106b-5p | PAM      | 5066   | ENSG00000145730 | validated |
| tarbase | hsa-miR-15b-5p  | PAM      | 5066   | ENSG00000145730 | validated |
| tarbase | hsa-miR-181a-5p | PAM      | 5066   | ENSG00000145730 | validated |
| tarbase | hsa-miR-301a-3p | PAM      | 5066   | ENSG00000145730 | validated |
| tarbase | hsa-miR-106b-5p | BDP1     | 55814  | ENSG00000145734 | validated |
| tarbase | hsa-miR-15b-5p  | BDP1     | 55814  | ENSG00000145734 | validated |
| tarbase | hsa-miR-181a-5p | TNFAIP8  | 25816  | ENSG00000145779 | validated |
| tarbase | hsa-miR-15b-5p  | FEM1C    | 56929  | ENSG00000145780 | validated |
| tarbase | hsa-miR-192-5p  | FEM1C    | 56929  | ENSG00000145780 | validated |
| tarbase | hsa-miR-212-3p  | FEM1C    | 56929  | ENSG00000145780 | validated |
| tarbase | hsa-miR-582-3p  | FEM1C    | 56929  | ENSG00000145780 | validated |
| tarbase | hsa-miR-106b-5p | COMMD10  | 51397  | ENSG00000145781 | validated |
| tarbase | hsa-miR-222-3p  | ADAMTS19 | 171019 | ENSG00000145808 | validated |
| tarbase | hsa-miR-15b-5p  | YIPF5    | 81555  | ENSG00000145817 | validated |
| tarbase | hsa-miR-181a-5p | YIPF5    | 81555  | ENSG00000145817 | validated |
| tarbase | hsa-miR-15b-5p  | DDX46    | 9879   | ENSG00000145833 | validated |
| tarbase | hsa-miR-18a-5p  | RNF145   | 153830 | ENSG00000145860 | validated |
| tarbase | hsa-miR-181a-5p | RNF145   | 153830 | ENSG00000145860 | validated |
| tarbase | hsa-miR-106b-5p | G3BP1    | 10146  | ENSG00000145907 | validated |
| tarbase | hsa-miR-144-3p  | G3BP1    | 10146  | ENSG00000145907 | validated |
| tarbase | hsa-miR-15b-5p  | G3BP1    | 10146  | ENSG00000145907 | validated |
| tarbase | hsa-miR-181a-5p | G3BP1    | 10146  | ENSG00000145907 | validated |
| tarbase | hsa-miR-192-5p  | G3BP1    | 10146  | ENSG00000145907 | validated |
| tarbase | hsa-miR-212-3p  | G3BP1    | 10146  | ENSG00000145907 | validated |
| tarbase | hsa-miR-21-5p   | G3BP1    | 10146  | ENSG00000145907 | validated |
| tarbase | hsa-miR-222-3p  | G3BP1    | 10146  | ENSG00000145907 | validated |
| tarbase | hsa-miR-301a-3p | G3BP1    | 10146  | ENSG00000145907 | validated |
| tarbase | hsa-miR-582-3p  | G3BP1    | 10146  | ENSG00000145907 | validated |
| tarbase | hsa-miR-21-5p   | RMND5B   | 64777  | ENSG00000145916 | validated |
| tarbase | hsa-miR-582-5p  | RMND5B   | 64777  | ENSG00000145916 | validated |
| tarbase | hsa-miR-21-5p   | BOD1     | 91272  | ENSG00000145919 | validated |
| tarbase | hsa-miR-296-5p  | BOD1     | 91272  | ENSG00000145919 | validated |
| tarbase | hsa-miR-301a-3p | TENM2    | 57451  | ENSG00000145934 | validated |
| tarbase | hsa-miR-301a-3p | FAM50B   | 26240  | ENSG00000145945 | validated |
| tarbase | hsa-miR-212-3p  | MYLK4    | 340156 | ENSG00000145949 | validated |
| tarbase | hsa-miR-192-5p  | GFOD1    | 54438  | ENSG00000145990 | validated |
| tarbase | hsa-miR-15b-5p  | LRRTM2   | 26045  | ENSG00000146006 | validated |
| tarbase | hsa-miR-582-3p  | ZMAT2    | 153527 | ENSG00000146007 | validated |
| tarbase | hsa-miR-21-5p   | KLHL3    | 26249  | ENSG00000146021 | validated |
| tarbase | hsa-miR-296-5p  | KLHL3    | 26249  | ENSG00000146021 | validated |
| tarbase | hsa-miR-301a-3p | KLHL3    | 26249  | ENSG00000146021 | validated |
| tarbase | hsa-miR-301a-3p | DCDC2    | 51473  | ENSG00000146038 | validated |
| tarbase | hsa-miR-212-3p  | H2BC1    | 255626 | ENSG00000146047 | validated |
| tarbase | hsa-miR-21-5p   | TRIM7    | 81786  | ENSG00000146054 | validated |
| tarbase | hsa-miR-21-5p   | TRIM41   | 90933  | ENSG00000146063 | validated |
| tarbase | hsa-miR-296-5p  | FAM193B  | 54540  | ENSG00000146067 | validated |
| tarbase | hsa-miR-222-3p  | RNF44    | 22838  | ENSG00000146083 | validated |
| tarbase | hsa-miR-15b-5p  | MMUT     | 4594   | ENSG00000146085 | validated |
| tarbase | hsa-miR-144-3p  | ABT1     | 29777  | ENSG00000146109 | validated |
| tarbase | hsa-miR-18a-5p  | RPL7L1   | 285855 | ENSG00000146223 | validated |
| tarbase | hsa-miR-18a-5p  | CYP39A1  | 51302  | ENSG00000146233 | validated |
| tarbase | hsa-miR-212-3p  | CYP39A1  | 51302  | ENSG00000146233 | validated |
| tarbase | hsa-miR-106b-5p | TPBG     | 7162   | ENSG00000146242 | validated |
| tarbase | hsa-miR-106b-5p | IRAK1BP1 | 134728 | ENSG00000146243 | validated |
| tarbase | hsa-miR-106b-5p | PHIP     | 55023  | ENSG00000146247 | validated |
| tarbase | hsa-miR-192-5p  | PHIP     | 55023  | ENSG00000146247 | validated |
| tarbase | hsa-miR-212-3p  | PHIP     | 55023  | ENSG00000146247 | validated |
| tarbase | hsa-miR-301a-3p | PHIP     | 55023  | ENSG00000146247 | validated |
| tarbase | hsa-miR-582-3p  | PHIP     | 55023  | ENSG00000146247 | validated |
| tarbase | hsa-miR-106b-5p | MMS22L   | 253714 | ENSG00000146263 | validated |
| tarbase | hsa-miR-505-3p  | MMS22L   | 253714 | ENSG00000146263 | validated |
| tarbase | hsa-miR-18a-5p  | PNRC1    | 10957  | ENSG00000146278 | validated |
| tarbase | hsa-miR-106b-5p | PM20D2   | 135293 | ENSG00000146281 | validated |
| tarbase | hsa-miR-212-3p  | PM20D2   | 135293 | ENSG00000146281 | validated |
| tarbase | hsa-miR-222-3p  | RARS2    | 57038  | ENSG00000146282 | validated |
| tarbase | hsa-miR-181a-5p | CLVS2    | 134829 | ENSG00000146352 | validated |



|         |                 |          |        |                 |           |
|---------|-----------------|----------|--------|-----------------|-----------|
| tarbase | hsa-miR-106b-5p | GPR6     | 2830   | ENSG00000146360 | validated |
| tarbase | hsa-miR-106b-5p | RNF217   | 154214 | ENSG00000146373 | validated |
| tarbase | hsa-miR-15b-5p  | RNF217   | 154214 | ENSG00000146373 | validated |
| tarbase | hsa-miR-181a-5p | RNF217   | 154214 | ENSG00000146373 | validated |
| tarbase | hsa-miR-15b-5p  | ARHGAP18 | 93663  | ENSG00000146376 | validated |
| tarbase | hsa-miR-181a-5p | ARHGAP18 | 93663  | ENSG00000146376 | validated |
| tarbase | hsa-miR-106b-5p | MTFR2    | 113115 | ENSG00000146410 | validated |
| tarbase | hsa-miR-192-5p  | DYNLT1   | 6993   | ENSG00000146425 | validated |
| tarbase | hsa-miR-222-3p  | TIAM2    | 26230  | ENSG00000146426 | validated |
| tarbase | hsa-miR-212-3p  | TIAM2    | 26230  | ENSG00000146426 | validated |
| tarbase | hsa-miR-106b-5p | TMEM181  | 57583  | ENSG00000146433 | validated |
| tarbase | hsa-miR-15b-5p  | TMEM181  | 57583  | ENSG00000146433 | validated |
| tarbase | hsa-miR-18a-5p  | TMEM181  | 57583  | ENSG00000146433 | validated |
| tarbase | hsa-miR-212-3p  | TMEM181  | 57583  | ENSG00000146433 | validated |
| tarbase | hsa-miR-582-5p  | TMEM181  | 57583  | ENSG00000146433 | validated |
| tarbase | hsa-miR-181a-5p | TMEM181  | 57583  | ENSG00000146433 | validated |
| tarbase | hsa-miR-106b-5p | WTAP     | 9589   | ENSG00000146457 | validated |
| tarbase | hsa-miR-15b-5p  | WTAP     | 9589   | ENSG00000146457 | validated |
| tarbase | hsa-miR-212-3p  | WTAP     | 9589   | ENSG00000146457 | validated |
| tarbase | hsa-miR-181a-5p | WTAP     | 9589   | ENSG00000146457 | validated |
| tarbase | hsa-miR-181a-5p | VIP      | 7432   | ENSG00000146469 | validated |
| tarbase | hsa-miR-181a-5p | ARMT1    | 79624  | ENSG00000146476 | validated |
| tarbase | hsa-miR-301a-3p | ARMT1    | 79624  | ENSG00000146476 | validated |
| tarbase | hsa-miR-106b-5p | SLC22A3  | 6581   | ENSG00000146477 | validated |
| tarbase | hsa-miR-212-3p  | SLC22A3  | 6581   | ENSG00000146477 | validated |
| tarbase | hsa-miR-15b-5p  | GNA12    | 2768   | ENSG00000146535 | validated |
| tarbase | hsa-miR-181a-5p | GNA12    | 2768   | ENSG00000146535 | validated |
| tarbase | hsa-miR-326     | C7orf50  | 84310  | ENSG00000146540 | validated |
| tarbase | hsa-miR-181a-5p | RBAK     | 57786  | ENSG00000146587 | validated |
| tarbase | hsa-miR-296-5p  | RBAK     | 57786  | ENSG00000146587 | validated |
| tarbase | hsa-miR-106b-5p | CREB5    | 9586   | ENSG00000146592 | validated |
| tarbase | hsa-miR-212-3p  | CREB5    | 9586   | ENSG00000146592 | validated |
| tarbase | hsa-miR-301a-3p | CREB5    | 9586   | ENSG00000146592 | validated |
| tarbase | hsa-miR-181a-5p | EGFR     | 1956   | ENSG00000146648 | validated |
| tarbase | hsa-miR-15b-5p  | CDCA5    | 113130 | ENSG00000146670 | validated |
| tarbase | hsa-miR-15b-5p  | IGFBP3   | 3486   | ENSG00000146674 | validated |
| tarbase | hsa-miR-21-5p   | IGFBP3   | 3486   | ENSG00000146674 | validated |
| tarbase | hsa-miR-18a-5p  | PURB     | 5814   | ENSG00000146676 | validated |
| tarbase | hsa-miR-192-5p  | PURB     | 5814   | ENSG00000146676 | validated |
| tarbase | hsa-miR-301a-3p | PURB     | 5814   | ENSG00000146676 | validated |
| tarbase | hsa-miR-15b-5p  | MDH2     | 4191   | ENSG00000146701 | validated |
| tarbase | hsa-miR-181a-5p | MDH2     | 4191   | ENSG00000146701 | validated |
| tarbase | hsa-miR-212-3p  | POMZP3   | 22932  | ENSG00000146707 | validated |
| tarbase | hsa-miR-181a-5p | CCT6A    | 908    | ENSG00000146731 | validated |
| tarbase | hsa-miR-106b-5p | PSPH     | 5723   | ENSG00000146733 | validated |
| tarbase | hsa-miR-181a-5p | ZNF92    | 168374 | ENSG00000146757 | validated |
| tarbase | hsa-miR-106b-5p | TMEM168  | 64418  | ENSG00000146802 | validated |
| tarbase | hsa-miR-301a-3p | TMEM168  | 64418  | ENSG00000146802 | validated |
| tarbase | hsa-miR-582-5p  | TMEM168  | 64418  | ENSG00000146802 | validated |
| tarbase | hsa-miR-18a-5p  | MAP11    | 55262  | ENSG00000146826 | validated |
| tarbase | hsa-miR-296-5p  | MAP11    | 55262  | ENSG00000146826 | validated |
| tarbase | hsa-miR-15b-5p  | GIGYF1   | 64599  | ENSG00000146830 | validated |
| tarbase | hsa-miR-192-5p  | GIGYF1   | 64599  | ENSG00000146830 | validated |
| tarbase | hsa-miR-326     | GIGYF1   | 64599  | ENSG00000146830 | validated |
| tarbase | hsa-miR-21-5p   | GIGYF1   | 64599  | ENSG00000146830 | validated |
| tarbase | hsa-miR-505-3p  | MEPCE    | 56257  | ENSG00000146834 | validated |
| tarbase | hsa-miR-582-3p  | MEPCE    | 56257  | ENSG00000146834 | validated |
| tarbase | hsa-miR-106b-5p | TMEM209  | 84928  | ENSG00000146842 | validated |
| tarbase | hsa-miR-18a-5p  | TMEM209  | 84928  | ENSG00000146842 | validated |
| tarbase | hsa-miR-21-5p   | TLK2     | 11011  | ENSG00000146872 | validated |
| tarbase | hsa-miR-212-3p  | CNPY1    | 285888 | ENSG00000146910 | validated |
| tarbase | hsa-miR-106b-5p | NCAPG2   | 54892  | ENSG00000146918 | validated |
| tarbase | hsa-miR-181a-5p | LUC7L2   | 51631  | ENSG00000146963 | validated |
| tarbase | hsa-miR-18a-5p  | LUC7L2   | 51631  | ENSG00000146963 | validated |
| tarbase | hsa-miR-21-5p   | LUC7L2   | 51631  | ENSG00000146963 | validated |
| tarbase | hsa-miR-582-5p  | LUC7L2   | 51631  | ENSG00000146963 | validated |
| tarbase | hsa-miR-212-3p  | CLTRN    | 57393  | ENSG00000147003 | validated |
| tarbase | hsa-miR-15b-5p  | TMEM47   | 83604  | ENSG00000147027 | validated |
| tarbase | hsa-miR-15b-5p  | KDM6A    | 7403   | ENSG00000147050 | validated |
| tarbase | hsa-miR-212-3p  | KDM6A    | 7403   | ENSG00000147050 | validated |
| tarbase | hsa-miR-15b-5p  | MSN      | 4478   | ENSG00000147065 | validated |

|         |                 |            |        |                 |           |
|---------|-----------------|------------|--------|-----------------|-----------|
| tarbase | hsa-miR-18a-5p  | ZNF182     | 7569   | ENSG00000147118 | validated |
| tarbase | hsa-miR-15b-5p  | ZMYM3      | 9203   | ENSG00000147130 | validated |
| tarbase | hsa-miR-301a-3p | ZMYM3      | 9203   | ENSG00000147130 | validated |
| tarbase | hsa-miR-296-5p  | TAF1       | 6872   | ENSG00000147133 | validated |
| tarbase | hsa-miR-15b-5p  | NONO       | 4841   | ENSG00000147140 | validated |
| tarbase | hsa-miR-192-5p  | NONO       | 4841   | ENSG00000147140 | validated |
| tarbase | hsa-miR-181a-5p | OGT        | 8473   | ENSG00000147162 | validated |
| tarbase | hsa-miR-582-5p  | OGT        | 8473   | ENSG00000147162 | validated |
| tarbase | hsa-miR-212-3p  | SNX12      | 29934  | ENSG00000147164 | validated |
| tarbase | hsa-miR-301a-3p | SNX12      | 29934  | ENSG00000147164 | validated |
| tarbase | hsa-miR-21-5p   | GCNA       | 93953  | ENSG00000147174 | validated |
| tarbase | hsa-miR-106b-5p | ZNF711     | 7552   | ENSG00000147180 | validated |
| tarbase | hsa-miR-144-3p  | ZNF711     | 7552   | ENSG00000147180 | validated |
| tarbase | hsa-miR-181a-5p | ZNF711     | 7552   | ENSG00000147180 | validated |
| tarbase | hsa-miR-222-3p  | ZNF711     | 7552   | ENSG00000147180 | validated |
| tarbase | hsa-miR-326     | ZNF711     | 7552   | ENSG00000147180 | validated |
| tarbase | hsa-miR-582-3p  | ZNF711     | 7552   | ENSG00000147180 | validated |
| tarbase | hsa-miR-582-5p  | ZNF711     | 7552   | ENSG00000147180 | validated |
| tarbase | hsa-miR-222-3p  | PRPS1      | 5631   | ENSG00000147224 | validated |
| tarbase | hsa-miR-212-3p  | PRPS1      | 5631   | ENSG00000147224 | validated |
| tarbase | hsa-miR-15b-5p  | FRMPD3     | 84443  | ENSG00000147234 | validated |
| tarbase | hsa-miR-21-5p   | DOCK11     | 139818 | ENSG00000147251 | validated |
| tarbase | hsa-miR-15b-5p  | GPC3       | 2719   | ENSG00000147257 | validated |
| tarbase | hsa-miR-301a-3p | MCPH1      | 79648  | ENSG00000147316 | validated |
| tarbase | hsa-miR-181a-5p | MFHAS1     | 9258   | ENSG00000147324 | validated |
| tarbase | hsa-miR-296-5p  | MFHAS1     | 9258   | ENSG00000147324 | validated |
| tarbase | hsa-miR-18a-5p  | MFHAS1     | 9258   | ENSG00000147324 | validated |
| tarbase | hsa-miR-21-5p   | ZNF185     | 7739   | ENSG00000147394 | validated |
| tarbase | hsa-miR-106b-5p | CSGALNACT1 | 55790  | ENSG00000147408 | validated |
| tarbase | hsa-miR-582-5p  | CCDC25     | 55246  | ENSG00000147419 | validated |
| tarbase | hsa-miR-15b-5p  | ERLIN2     | 11160  | ENSG00000147475 | validated |
| tarbase | hsa-miR-296-5p  | ERLIN2     | 11160  | ENSG00000147475 | validated |
| tarbase | hsa-miR-582-3p  | ERLIN2     | 11160  | ENSG00000147475 | validated |
| tarbase | hsa-miR-106b-5p | ERLIN2     | 11160  | ENSG00000147475 | validated |
| tarbase | hsa-miR-15b-5p  | TACC1      | 6867   | ENSG00000147526 | validated |
| tarbase | hsa-miR-21-5p   | TACC1      | 6867   | ENSG00000147526 | validated |
| tarbase | hsa-miR-222-3p  | TACC1      | 6867   | ENSG00000147526 | validated |
| tarbase | hsa-miR-301a-3p | TACC1      | 6867   | ENSG00000147526 | validated |
| tarbase | hsa-miR-326     | GOLGA7     | 51125  | ENSG00000147533 | validated |
| tarbase | hsa-miR-181a-5p | GOLGA7     | 51125  | ENSG00000147533 | validated |
| tarbase | hsa-miR-212-3p  | GINS4      | 84296  | ENSG00000147536 | validated |
| tarbase | hsa-miR-106b-5p | NSD3       | 54904  | ENSG00000147548 | validated |
| tarbase | hsa-miR-505-3p  | NSD3       | 54904  | ENSG00000147548 | validated |
| tarbase | hsa-miR-15b-5p  | NSD3       | 54904  | ENSG00000147548 | validated |
| tarbase | hsa-miR-181a-5p | NSD3       | 54904  | ENSG00000147548 | validated |
| tarbase | hsa-miR-15b-5p  | PMP2       | 5375   | ENSG00000147588 | validated |
| tarbase | hsa-miR-144-3p  | LACTB2     | 51110  | ENSG00000147592 | validated |
| tarbase | hsa-miR-18a-5p  | LACTB2     | 51110  | ENSG00000147592 | validated |
| tarbase | hsa-miR-106b-5p | SYBU       | 55638  | ENSG00000147642 | validated |
| tarbase | hsa-miR-21-5p   | SYBU       | 55638  | ENSG00000147642 | validated |
| tarbase | hsa-miR-301a-3p | SYBU       | 55638  | ENSG00000147642 | validated |
| tarbase | hsa-miR-582-3p  | SYBU       | 55638  | ENSG00000147642 | validated |
| tarbase | hsa-miR-212-3p  | DPYS       | 1807   | ENSG00000147647 | validated |
| tarbase | hsa-miR-106b-5p | MTDH       | 92140  | ENSG00000147649 | validated |
| tarbase | hsa-miR-582-5p  | MTDH       | 92140  | ENSG00000147649 | validated |
| tarbase | hsa-miR-181a-5p | POLR2K     | 5440   | ENSG00000147669 | validated |
| tarbase | hsa-miR-301a-3p | MAL2       | 114569 | ENSG00000147676 | validated |
| tarbase | hsa-miR-106b-5p | UTP23      | 84294  | ENSG00000147679 | validated |
| tarbase | hsa-miR-106b-5p | VLDLR      | 7436   | ENSG00000147852 | validated |
| tarbase | hsa-miR-212-3p  | VLDLR      | 7436   | ENSG00000147852 | validated |
| tarbase | hsa-miR-21-5p   | VLDLR      | 7436   | ENSG00000147852 | validated |
| tarbase | hsa-miR-192-5p  | VLDLR      | 7436   | ENSG00000147852 | validated |
| tarbase | hsa-miR-106b-5p | AK3        | 50808  | ENSG00000147853 | validated |
| tarbase | hsa-miR-181a-5p | AK3        | 50808  | ENSG00000147853 | validated |
| tarbase | hsa-miR-15b-5p  | NFIB       | 4781   | ENSG00000147862 | validated |
| tarbase | hsa-miR-181a-5p | NFIB       | 4781   | ENSG00000147862 | validated |
| tarbase | hsa-miR-212-3p  | NFIB       | 4781   | ENSG00000147862 | validated |
| tarbase | hsa-miR-15b-5p  | FBXO10     | 26267  | ENSG00000147912 | validated |
| tarbase | hsa-miR-301a-3p | FBXO10     | 26267  | ENSG00000147912 | validated |
| tarbase | hsa-miR-18a-5p  | SIGMAR1    | 10280  | ENSG00000147955 | validated |
| tarbase | hsa-miR-212-3p  | CEP78      | 84131  | ENSG00000148019 | validated |

|         |                 |          |        |                 |           |
|---------|-----------------|----------|--------|-----------------|-----------|
| tarbase | hsa-miR-15b-5p  | NTRK2    | 4915   | ENSG00000148053 | validated |
| tarbase | hsa-miR-181a-5p | NTRK2    | 4915   | ENSG00000148053 | validated |
| tarbase | hsa-miR-15b-5p  | MFSD14B  | 84641  | ENSG00000148110 | validated |
| tarbase | hsa-miR-21-5p   | ZNF462   | 58499  | ENSG00000148143 | validated |
| tarbase | hsa-miR-106b-5p | INIP     | 58493  | ENSG00000148153 | validated |
| tarbase | hsa-miR-181a-5p | INIP     | 58493  | ENSG00000148153 | validated |
| tarbase | hsa-miR-144-3p  | UGCG     | 7357   | ENSG00000148154 | validated |
| tarbase | hsa-miR-181a-5p | UGCG     | 7357   | ENSG00000148154 | validated |
| tarbase | hsa-miR-21-5p   | UGCG     | 7357   | ENSG00000148154 | validated |
| tarbase | hsa-miR-222-3p  | UGCG     | 7357   | ENSG00000148154 | validated |
| tarbase | hsa-miR-106b-5p | SNX30    | 401548 | ENSG00000148158 | validated |
| tarbase | hsa-miR-15b-5p  | SNX30    | 401548 | ENSG00000148158 | validated |
| tarbase | hsa-miR-582-3p  | STOM     | 2040   | ENSG00000148175 | validated |
| tarbase | hsa-miR-15b-5p  | STOM     | 2040   | ENSG00000148175 | validated |
| tarbase | hsa-miR-18a-5p  | NR6A1    | 2649   | ENSG00000148200 | validated |
| tarbase | hsa-miR-301a-3p | NR6A1    | 2649   | ENSG00000148200 | validated |
| tarbase | hsa-miR-106b-5p | POLE3    | 54107  | ENSG00000148229 | validated |
| tarbase | hsa-miR-18a-5p  | POLE3    | 54107  | ENSG00000148229 | validated |
| tarbase | hsa-miR-15b-5p  | SURF4    | 6836   | ENSG00000148248 | validated |
| tarbase | hsa-miR-18a-5p  | SURF4    | 6836   | ENSG00000148248 | validated |
| tarbase | hsa-miR-212-3p  | SURF4    | 6836   | ENSG00000148248 | validated |
| tarbase | hsa-miR-212-3p  | SURF2    | 6835   | ENSG00000148291 | validated |
| tarbase | hsa-miR-212-3p  | ASB6     | 140459 | ENSG00000148331 | validated |
| tarbase | hsa-miR-21-5p   | ASB6     | 140459 | ENSG00000148331 | validated |
| tarbase | hsa-miR-21-5p   | PTGES2   | 80142  | ENSG00000148334 | validated |
| tarbase | hsa-miR-15b-5p  | NTMT1    | 28989  | ENSG00000148335 | validated |
| tarbase | hsa-miR-301a-3p | SLC25A25 | 114789 | ENSG00000148339 | validated |
| tarbase | hsa-miR-222-3p  | LRSAM1   | 90678  | ENSG00000148356 | validated |
| tarbase | hsa-miR-15b-5p  | INPP5E   | 56623  | ENSG00000148384 | validated |
| tarbase | hsa-miR-296-5p  | INPP5E   | 56623  | ENSG00000148384 | validated |
| tarbase | hsa-miR-181a-5p | SEC16A   | 9919   | ENSG00000148396 | validated |
| tarbase | hsa-miR-212-3p  | SEC16A   | 9919   | ENSG00000148396 | validated |
| tarbase | hsa-miR-296-5p  | SEC16A   | 9919   | ENSG00000148396 | validated |
| tarbase | hsa-miR-15b-5p  | NACC2    | 138151 | ENSG00000148411 | validated |
| tarbase | hsa-miR-181a-5p | NACC2    | 138151 | ENSG00000148411 | validated |
| tarbase | hsa-miR-212-3p  | NACC2    | 138151 | ENSG00000148411 | validated |
| tarbase | hsa-miR-222-3p  | NACC2    | 138151 | ENSG00000148411 | validated |
| tarbase | hsa-miR-181a-5p | USP6NL   | 9712   | ENSG00000148429 | validated |
| tarbase | hsa-miR-106b-5p | COMMD3   | 23412  | ENSG00000148444 | validated |
| tarbase | hsa-miR-212-3p  | MSRB2    | 22921  | ENSG00000148450 | validated |
| tarbase | hsa-miR-15b-5p  | FAM171A1 | 221061 | ENSG00000148468 | validated |
| tarbase | hsa-miR-181a-5p | FAM171A1 | 221061 | ENSG00000148468 | validated |
| tarbase | hsa-miR-326     | PARD3    | 56288  | ENSG00000148498 | validated |
| tarbase | hsa-miR-212-3p  | FAM13C   | 220965 | ENSG00000148541 | validated |
| tarbase | hsa-miR-106b-5p | NRBF2    | 29982  | ENSG00000148572 | validated |
| tarbase | hsa-miR-212-3p  | CDHR1    | 92211  | ENSG00000148600 | validated |
| tarbase | hsa-miR-15b-5p  | POLR3A   | 11128  | ENSG00000148606 | validated |
| tarbase | hsa-miR-181a-5p | HERC4    | 26091  | ENSG00000148634 | validated |
| tarbase | hsa-miR-212-3p  | HERC4    | 26091  | ENSG00000148634 | validated |
| tarbase | hsa-miR-212-3p  | ADIRF    | 10974  | ENSG00000148671 | validated |
| tarbase | hsa-miR-212-3p  | ANKRD1   | 27063  | ENSG00000148677 | validated |
| tarbase | hsa-miR-181a-5p | ADD3     | 120    | ENSG00000148700 | validated |
| tarbase | hsa-miR-18a-5p  | ADD3     | 120    | ENSG00000148700 | validated |
| tarbase | hsa-miR-21-5p   | ADD3     | 120    | ENSG00000148700 | validated |
| tarbase | hsa-miR-181a-5p | EIF4EBP2 | 1979   | ENSG00000148730 | validated |
| tarbase | hsa-miR-222-3p  | EIF4EBP2 | 1979   | ENSG00000148730 | validated |
| tarbase | hsa-miR-326     | EIF4EBP2 | 1979   | ENSG00000148730 | validated |
| tarbase | hsa-miR-144-3p  | TCF7L2   | 6934   | ENSG00000148737 | validated |
| tarbase | hsa-miR-181a-5p | TCF7L2   | 6934   | ENSG00000148737 | validated |
| tarbase | hsa-miR-106b-5p | MKI67    | 4288   | ENSG00000148773 | validated |
| tarbase | hsa-miR-222-3p  | MKI67    | 4288   | ENSG00000148773 | validated |
| tarbase | hsa-miR-212-3p  | INA      | 9118   | ENSG00000148798 | validated |
| tarbase | hsa-miR-296-5p  | GSTO1    | 9446   | ENSG00000148834 | validated |
| tarbase | hsa-miR-582-5p  | TAF5     | 6877   | ENSG00000148835 | validated |
| tarbase | hsa-miR-15b-5p  | PPRC1    | 23082  | ENSG00000148840 | validated |
| tarbase | hsa-miR-212-3p  | PPRC1    | 23082  | ENSG00000148840 | validated |
| tarbase | hsa-miR-301a-3p | PPRC1    | 23082  | ENSG00000148840 | validated |
| tarbase | hsa-miR-582-3p  | PPRC1    | 23082  | ENSG00000148840 | validated |
| tarbase | hsa-miR-582-3p  | ITPRIP   | 85450  | ENSG00000148841 | validated |
| tarbase | hsa-miR-582-5p  | CNNM2    | 54805  | ENSG00000148842 | validated |
| tarbase | hsa-miR-582-3p  | PDCD11   | 22984  | ENSG00000148843 | validated |

|         |                 |          |        |                 |           |
|---------|-----------------|----------|--------|-----------------|-----------|
| tarbase | hsa-miR-181a-5p | ADAM12   | 8038   | ENSG00000148848 | validated |
| tarbase | hsa-miR-106b-5p | BTBD10   | 84280  | ENSG00000148925 | validated |
| tarbase | hsa-miR-181a-5p | ADM      | 133    | ENSG00000148926 | validated |
| tarbase | hsa-miR-181a-5p | LIN7C    | 55327  | ENSG00000148943 | validated |
| tarbase | hsa-miR-222-3p  | LIN7C    | 55327  | ENSG00000148943 | validated |
| tarbase | hsa-miR-192-5p  | LIN7C    | 55327  | ENSG00000148943 | validated |
| tarbase | hsa-miR-212-3p  | IMMP1L   | 196294 | ENSG00000148950 | validated |
| tarbase | hsa-miR-15b-5p  | TUT1     | 64852  | ENSG00000149016 | validated |
| tarbase | hsa-miR-582-3p  | EIF3M    | 10480  | ENSG00000149100 | validated |
| tarbase | hsa-miR-106b-5p | TNKS1BP1 | 85456  | ENSG00000149115 | validated |
| tarbase | hsa-miR-15b-5p  | TNKS1BP1 | 85456  | ENSG00000149115 | validated |
| tarbase | hsa-miR-21-5p   | TNKS1BP1 | 85456  | ENSG00000149115 | validated |
| tarbase | hsa-miR-212-3p  | PTPRJ    | 5795   | ENSG00000149177 | validated |
| tarbase | hsa-miR-222-3p  | PTPRJ    | 5795   | ENSG00000149177 | validated |
| tarbase | hsa-miR-301a-3p | PTPRJ    | 5795   | ENSG00000149177 | validated |
| tarbase | hsa-miR-582-5p  | PTPRJ    | 5795   | ENSG00000149177 | validated |
| tarbase | hsa-miR-15b-5p  | C11orf49 | 79096  | ENSG00000149179 | validated |
| tarbase | hsa-miR-106b-5p | CELF1    | 10658  | ENSG00000149187 | validated |
| tarbase | hsa-miR-15b-5p  | CELF1    | 10658  | ENSG00000149187 | validated |
| tarbase | hsa-miR-181a-5p | CELF1    | 10658  | ENSG00000149187 | validated |
| tarbase | hsa-miR-18a-5p  | CELF1    | 10658  | ENSG00000149187 | validated |
| tarbase | hsa-miR-192-5p  | CELF1    | 10658  | ENSG00000149187 | validated |
| tarbase | hsa-miR-21-5p   | CELF1    | 10658  | ENSG00000149187 | validated |
| tarbase | hsa-miR-296-5p  | CELF1    | 10658  | ENSG00000149187 | validated |
| tarbase | hsa-miR-301a-3p | CELF1    | 10658  | ENSG00000149187 | validated |
| tarbase | hsa-miR-326     | CELF1    | 10658  | ENSG00000149187 | validated |
| tarbase | hsa-miR-505-3p  | CELF1    | 10658  | ENSG00000149187 | validated |
| tarbase | hsa-miR-15b-5p  | SESN3    | 143686 | ENSG00000149212 | validated |
| tarbase | hsa-miR-181a-5p | SESN3    | 143686 | ENSG00000149212 | validated |
| tarbase | hsa-miR-222-3p  | SESN3    | 143686 | ENSG00000149212 | validated |
| tarbase | hsa-miR-301a-3p | SESN3    | 143686 | ENSG00000149212 | validated |
| tarbase | hsa-miR-181a-5p | ENDOD1   | 23052  | ENSG00000149218 | validated |
| tarbase | hsa-miR-15b-5p  | CCDC82   | 79780  | ENSG00000149231 | validated |
| tarbase | hsa-miR-181a-5p | CCDC82   | 79780  | ENSG00000149231 | validated |
| tarbase | hsa-miR-212-3p  | SERPINH1 | 871    | ENSG00000149257 | validated |
| tarbase | hsa-miR-505-3p  | RPS3     | 6188   | ENSG00000149273 | validated |
| tarbase | hsa-miR-582-5p  | RPS3     | 6188   | ENSG00000149273 | validated |
| tarbase | hsa-miR-181a-5p | ZC3H12C  | 85463  | ENSG00000149289 | validated |
| tarbase | hsa-miR-18a-5p  | ZC3H12C  | 85463  | ENSG00000149289 | validated |
| tarbase | hsa-miR-212-3p  | ZC3H12C  | 85463  | ENSG00000149289 | validated |
| tarbase | hsa-miR-301a-3p | ZC3H12C  | 85463  | ENSG00000149289 | validated |
| tarbase | hsa-miR-212-3p  | ATM      | 472    | ENSG00000149311 | validated |
| tarbase | hsa-miR-15b-5p  | LAMTOR1  | 55004  | ENSG00000149357 | validated |
| tarbase | hsa-miR-18a-5p  | LAMTOR1  | 55004  | ENSG00000149357 | validated |
| tarbase | hsa-miR-21-5p   | LAMTOR1  | 55004  | ENSG00000149357 | validated |
| tarbase | hsa-miR-106b-5p | HYOU1    | 10525  | ENSG00000149428 | validated |
| tarbase | hsa-miR-18a-5p  | HYOU1    | 10525  | ENSG00000149428 | validated |
| tarbase | hsa-miR-222-3p  | HYOU1    | 10525  | ENSG00000149428 | validated |
| tarbase | hsa-miR-296-5p  | HYOU1    | 10525  | ENSG00000149428 | validated |
| tarbase | hsa-miR-15b-5p  | KAT14    | 57325  | ENSG00000149474 | validated |
| tarbase | hsa-miR-181a-5p | TMEM138  | 51524  | ENSG00000149483 | validated |
| tarbase | hsa-miR-326     | FADS1    | 3992   | ENSG00000149485 | validated |
| tarbase | hsa-miR-106b-5p | EML3     | 256364 | ENSG00000149499 | validated |
| tarbase | hsa-miR-21-5p   | EML3     | 256364 | ENSG00000149499 | validated |
| tarbase | hsa-miR-192-5p  | EI24     | 9538   | ENSG00000149547 | validated |
| tarbase | hsa-miR-106b-5p | CHEK1    | 1111   | ENSG00000149554 | validated |
| tarbase | hsa-miR-301a-3p | CHEK1    | 1111   | ENSG00000149554 | validated |
| tarbase | hsa-miR-106b-5p | MPZL2    | 10205  | ENSG00000149573 | validated |
| tarbase | hsa-miR-212-3p  | SCN2B    | 6327   | ENSG00000149575 | validated |
| tarbase | hsa-miR-106b-5p | TMEM25   | 84866  | ENSG00000149582 | validated |
| tarbase | hsa-miR-192-5p  | COMMD7   | 149951 | ENSG00000149600 | validated |
| tarbase | hsa-miR-212-3p  | DSN1     | 79980  | ENSG00000149636 | validated |
| tarbase | hsa-miR-106b-5p | SOGA1    | 140710 | ENSG00000149639 | validated |
| tarbase | hsa-miR-15b-5p  | SOGA1    | 140710 | ENSG00000149639 | validated |
| tarbase | hsa-miR-181a-5p | SOGA1    | 140710 | ENSG00000149639 | validated |
| tarbase | hsa-miR-296-5p  | SOGA1    | 140710 | ENSG00000149639 | validated |
| tarbase | hsa-miR-15b-5p  | LSM14B   | 149986 | ENSG00000149657 | validated |
| tarbase | hsa-miR-18a-5p  | LSM14B   | 149986 | ENSG00000149657 | validated |
| tarbase | hsa-miR-296-5p  | LSM14B   | 149986 | ENSG00000149657 | validated |
| tarbase | hsa-miR-301a-3p | LSM14B   | 149986 | ENSG00000149657 | validated |
| tarbase | hsa-miR-106b-5p | YTHDF1   | 54915  | ENSG00000149658 | validated |

|         |                 |          |        |                 |           |
|---------|-----------------|----------|--------|-----------------|-----------|
| tarbase | hsa-miR-15b-5p  | YTHDF1   | 54915  | ENSG00000149658 | validated |
| tarbase | hsa-miR-18a-5p  | YTHDF1   | 54915  | ENSG00000149658 | validated |
| tarbase | hsa-miR-212-3p  | CABLES2  | 81928  | ENSG00000149679 | validated |
| tarbase | hsa-miR-21-5p   | MRPL49   | 740    | ENSG00000149792 | validated |
| tarbase | hsa-miR-15b-5p  | TM7SF2   | 7108   | ENSG00000149809 | validated |
| tarbase | hsa-miR-296-5p  | TM7SF2   | 7108   | ENSG00000149809 | validated |
| tarbase | hsa-miR-296-5p  | PPP4C    | 5531   | ENSG00000149923 | validated |
| tarbase | hsa-miR-15b-5p  | ALDOA    | 226    | ENSG00000149925 | validated |
| tarbase | hsa-miR-18a-5p  | ALDOA    | 226    | ENSG00000149925 | validated |
| tarbase | hsa-miR-21-5p   | ALDOA    | 226    | ENSG00000149925 | validated |
| tarbase | hsa-miR-296-5p  | ALDOA    | 226    | ENSG00000149925 | validated |
| tarbase | hsa-miR-301a-3p | ALDOA    | 226    | ENSG00000149925 | validated |
| tarbase | hsa-miR-15b-5p  | DOC2A    | 8448   | ENSG00000149927 | validated |
| tarbase | hsa-miR-106b-5p | TAOK2    | 9344   | ENSG00000149930 | validated |
| tarbase | hsa-miR-15b-5p  | TAOK2    | 9344   | ENSG00000149930 | validated |
| tarbase | hsa-miR-18a-5p  | TAOK2    | 9344   | ENSG00000149930 | validated |
| tarbase | hsa-miR-296-5p  | TAOK2    | 9344   | ENSG00000149930 | validated |
| tarbase | hsa-miR-326     | TAOK2    | 9344   | ENSG00000149930 | validated |
| tarbase | hsa-miR-106b-5p | HMGA2    | 8091   | ENSG00000149948 | validated |
| tarbase | hsa-miR-15b-5p  | HMGA2    | 8091   | ENSG00000149948 | validated |
| tarbase | hsa-miR-301a-3p | HMGA2    | 8091   | ENSG00000149948 | validated |
| tarbase | hsa-miR-212-3p  | MKX      | 283078 | ENSG00000150051 | validated |
| tarbase | hsa-miR-212-3p  | MPP7     | 143098 | ENSG00000150054 | validated |
| tarbase | hsa-miR-181a-5p | ITGB1    | 3688   | ENSG00000150093 | validated |
| tarbase | hsa-miR-582-3p  | ITGB1    | 3688   | ENSG00000150093 | validated |
| tarbase | hsa-miR-18a-5p  | CWC15    | 51503  | ENSG00000150316 | validated |
| tarbase | hsa-miR-15b-5p  | ARID5B   | 84159  | ENSG00000150347 | validated |
| tarbase | hsa-miR-212-3p  | ARID5B   | 84159  | ENSG00000150347 | validated |
| tarbase | hsa-miR-21-5p   | ARID5B   | 84159  | ENSG00000150347 | validated |
| tarbase | hsa-miR-301a-3p | ARID5B   | 84159  | ENSG00000150347 | validated |
| tarbase | hsa-miR-181a-5p | TMCO3    | 55002  | ENSG00000150403 | validated |
| tarbase | hsa-miR-106b-5p | LATS2    | 26524  | ENSG00000150457 | validated |
| tarbase | hsa-miR-15b-5p  | LATS2    | 26524  | ENSG00000150457 | validated |
| tarbase | hsa-miR-301a-3p | LATS2    | 26524  | ENSG00000150457 | validated |
| tarbase | hsa-miR-15b-5p  | KIAA1328 | 57536  | ENSG00000150477 | validated |
| tarbase | hsa-miR-301a-3p | LYPD1    | 116372 | ENSG00000150551 | validated |
| tarbase | hsa-miR-144-3p  | PDCD4    | 27250  | ENSG00000150593 | validated |
| tarbase | hsa-miR-181a-5p | PDCD4    | 27250  | ENSG00000150593 | validated |
| tarbase | hsa-miR-181a-5p | GPM6A    | 2823   | ENSG00000150625 | validated |
| tarbase | hsa-miR-212-3p  | SPATA4   | 132851 | ENSG00000150628 | validated |
| tarbase | hsa-miR-21-5p   | VEGFC    | 7424   | ENSG00000150630 | validated |
| tarbase | hsa-miR-15b-5p  | CCDC102B | 79839  | ENSG00000150636 | validated |
| tarbase | hsa-miR-212-3p  | FSIP1    | 161835 | ENSG00000150667 | validated |
| tarbase | hsa-miR-582-5p  | PRSS23   | 11098  | ENSG00000150687 | validated |
| tarbase | hsa-miR-21-5p   | CCT5     | 22948  | ENSG00000150753 | validated |
| tarbase | hsa-miR-222-3p  | CCT5     | 22948  | ENSG00000150753 | validated |
| tarbase | hsa-miR-582-5p  | CCT5     | 22948  | ENSG00000150753 | validated |
| tarbase | hsa-miR-181a-5p | DOCK1    | 1793   | ENSG00000150760 | validated |
| tarbase | hsa-miR-21-5p   | DOCK1    | 1793   | ENSG00000150760 | validated |
| tarbase | hsa-miR-15b-5p  | DIXDC1   | 85458  | ENSG00000150764 | validated |
| tarbase | hsa-miR-192-5p  | DLAT     | 1737   | ENSG00000150768 | validated |
| tarbase | hsa-miR-21-5p   | DLAT     | 1737   | ENSG00000150768 | validated |
| tarbase | hsa-miR-301a-3p | IL18     | 3606   | ENSG00000150782 | validated |
| tarbase | hsa-miR-181a-5p | PIP4K2A  | 5305   | ENSG00000150867 | validated |
| tarbase | hsa-miR-15b-5p  | FREM2    | 341640 | ENSG00000150893 | validated |
| tarbase | hsa-miR-326     | FREM2    | 341640 | ENSG00000150893 | validated |
| tarbase | hsa-miR-212-3p  | FREM2    | 341640 | ENSG00000150893 | validated |
| tarbase | hsa-miR-582-3p  | FOXO1    | 2308   | ENSG00000150907 | validated |
| tarbase | hsa-miR-582-5p  | FOXO1    | 2308   | ENSG00000150907 | validated |
| tarbase | hsa-miR-106b-5p | CRIM1    | 51232  | ENSG00000150938 | validated |
| tarbase | hsa-miR-181a-5p | CRIM1    | 51232  | ENSG00000150938 | validated |
| tarbase | hsa-miR-296-5p  | ABCB9    | 23457  | ENSG00000150967 | validated |
| tarbase | hsa-miR-326     | UBC      | 7316   | ENSG00000150991 | validated |
| tarbase | hsa-miR-301a-3p | SLC7A11  | 23657  | ENSG00000151012 | validated |
| tarbase | hsa-miR-192-5p  | NOCT     | 25819  | ENSG00000151014 | validated |
| tarbase | hsa-miR-21-5p   | NOCT     | 25819  | ENSG00000151014 | validated |
| tarbase | hsa-miR-21-5p   | THR3     | 7068   | ENSG00000151090 | validated |
| tarbase | hsa-miR-106b-5p | UEVLD    | 55293  | ENSG00000151116 | validated |
| tarbase | hsa-miR-301a-3p | UBE3B    | 89910  | ENSG00000151148 | validated |
| tarbase | hsa-miR-15b-5p  | ANK3     | 288    | ENSG00000151150 | validated |
| tarbase | hsa-miR-106b-5p | IPMK     | 253430 | ENSG00000151151 | validated |

|         |                 |          |        |                 |           |
|---------|-----------------|----------|--------|-----------------|-----------|
| tarbase | hsa-miR-582-5p  | IPMK     | 253430 | ENSG00000151151 | validated |
| tarbase | hsa-miR-192-5p  | RAD9B    | 144715 | ENSG00000151164 | validated |
| tarbase | hsa-miR-212-3p  | PLBD2    | 196463 | ENSG00000151176 | validated |
| tarbase | hsa-miR-301a-3p | PLBD2    | 196463 | ENSG00000151176 | validated |
| tarbase | hsa-miR-326     | DLG5     | 9231   | ENSG00000151208 | validated |
| tarbase | hsa-miR-106b-5p | GXYLT1   | 283464 | ENSG00000151233 | validated |
| tarbase | hsa-miR-181a-5p | GXYLT1   | 283464 | ENSG00000151233 | validated |
| tarbase | hsa-miR-192-5p  | GXYLT1   | 283464 | ENSG00000151233 | validated |
| tarbase | hsa-miR-181a-5p | TWF1     | 5756   | ENSG00000151239 | validated |
| tarbase | hsa-miR-301a-3p | TWF1     | 5756   | ENSG00000151239 | validated |
| tarbase | hsa-miR-106b-5p | DIP2C    | 22982  | ENSG00000151240 | validated |
| tarbase | hsa-miR-181a-5p | DIP2C    | 22982  | ENSG00000151240 | validated |
| tarbase | hsa-miR-106b-5p | EIF4E    | 1977   | ENSG00000151247 | validated |
| tarbase | hsa-miR-106b-5p | TEX30    | 93081  | ENSG00000151287 | validated |
| tarbase | hsa-miR-181a-5p | FAM177A1 | 283635 | ENSG00000151327 | validated |
| tarbase | hsa-miR-15b-5p  | MBIP     | 51562  | ENSG00000151332 | validated |
| tarbase | hsa-miR-212-3p  | MBIP     | 51562  | ENSG00000151332 | validated |
| tarbase | hsa-miR-15b-5p  | MIPOL1   | 145282 | ENSG00000151338 | validated |
| tarbase | hsa-miR-15b-5p  | EXT2     | 2132   | ENSG00000151348 | validated |
| tarbase | hsa-miR-582-3p  | EXT2     | 2132   | ENSG00000151348 | validated |
| tarbase | hsa-miR-144-3p  | NDUFC2   | 4718   | ENSG00000151366 | validated |
| tarbase | hsa-miR-222-3p  | NDUFC2   | 4718   | ENSG00000151366 | validated |
| tarbase | hsa-miR-181a-5p | NEK7     | 140609 | ENSG00000151414 | validated |
| tarbase | hsa-miR-18a-5p  | NEK7     | 140609 | ENSG00000151414 | validated |
| tarbase | hsa-miR-21-5p   | NEK7     | 140609 | ENSG00000151414 | validated |
| tarbase | hsa-miR-222-3p  | NEK7     | 140609 | ENSG00000151414 | validated |
| tarbase | hsa-miR-582-3p  | NEK7     | 140609 | ENSG00000151414 | validated |
| tarbase | hsa-miR-181a-5p | ANKRD50  | 57182  | ENSG00000151458 | validated |
| tarbase | hsa-miR-21-5p   | ANKRD50  | 57182  | ENSG00000151458 | validated |
| tarbase | hsa-miR-18a-5p  | ANKRD50  | 57182  | ENSG00000151458 | validated |
| tarbase | hsa-miR-21-5p   | CDC123   | 8872   | ENSG00000151465 | validated |
| tarbase | hsa-miR-582-3p  | SCLT1    | 132320 | ENSG00000151466 | validated |
| tarbase | hsa-miR-212-3p  | SCLT1    | 132320 | ENSG00000151466 | validated |
| tarbase | hsa-miR-106b-5p | FRMD4A   | 55691  | ENSG00000151474 | validated |
| tarbase | hsa-miR-106b-5p | EPS8     | 2059   | ENSG00000151491 | validated |
| tarbase | hsa-miR-181a-5p | QDPR     | 5860   | ENSG00000151552 | validated |
| tarbase | hsa-miR-15b-5p  | FAM160B1 | 57700  | ENSG00000151553 | validated |
| tarbase | hsa-miR-181a-5p | FAM160B1 | 57700  | ENSG00000151553 | validated |
| tarbase | hsa-miR-18a-5p  | FAM160B1 | 57700  | ENSG00000151553 | validated |
| tarbase | hsa-miR-21-5p   | FAM160B1 | 57700  | ENSG00000151553 | validated |
| tarbase | hsa-miR-582-5p  | FAM160B1 | 57700  | ENSG00000151553 | validated |
| tarbase | hsa-miR-15b-5p  | QTRT2    | 79691  | ENSG00000151576 | validated |
| tarbase | hsa-miR-106b-5p | ZNF827   | 152485 | ENSG00000151612 | validated |
| tarbase | hsa-miR-15b-5p  | ZNF827   | 152485 | ENSG00000151612 | validated |
| tarbase | hsa-miR-212-3p  | NR3C2    | 4306   | ENSG00000151623 | validated |
| tarbase | hsa-miR-222-3p  | AKR1C2   | 1646   | ENSG00000151632 | validated |
| tarbase | hsa-miR-181a-5p | INPP1    | 3628   | ENSG00000151689 | validated |
| tarbase | hsa-miR-181a-5p | MFSD6    | 54842  | ENSG00000151690 | validated |
| tarbase | hsa-miR-106b-5p | ASAP2    | 8853   | ENSG00000151693 | validated |
| tarbase | hsa-miR-301a-3p | ASAP2    | 8853   | ENSG00000151693 | validated |
| tarbase | hsa-miR-222-3p  | ADAM17   | 6868   | ENSG00000151694 | validated |
| tarbase | hsa-miR-21-5p   | FLI1     | 2313   | ENSG00000151702 | validated |
| tarbase | hsa-miR-582-5p  | FLI1     | 2313   | ENSG00000151702 | validated |
| tarbase | hsa-miR-106b-5p | WWC2     | 80014  | ENSG00000151718 | validated |
| tarbase | hsa-miR-181a-5p | WWC2     | 80014  | ENSG00000151718 | validated |
| tarbase | hsa-miR-15b-5p  | CENPU    | 79682  | ENSG00000151725 | validated |
| tarbase | hsa-miR-181a-5p | SLC25A4  | 291    | ENSG00000151729 | validated |
| tarbase | hsa-miR-15b-5p  | AMN1     | 196394 | ENSG00000151743 | validated |
| tarbase | hsa-miR-212-3p  | BICD1    | 636    | ENSG00000151746 | validated |
| tarbase | hsa-miR-181a-5p | SAV1     | 60485  | ENSG00000151748 | validated |
| tarbase | hsa-miR-21-5p   | SAV1     | 60485  | ENSG00000151748 | validated |
| tarbase | hsa-miR-212-3p  | CCDC122  | 160857 | ENSG00000151773 | validated |
| tarbase | hsa-miR-15b-5p  | SACS     | 26278  | ENSG00000151835 | validated |
| tarbase | hsa-miR-181a-5p | SACS     | 26278  | ENSG00000151835 | validated |
| tarbase | hsa-miR-21-5p   | PABPC3   | 5042   | ENSG00000151846 | validated |
| tarbase | hsa-miR-222-3p  | PABPC3   | 5042   | ENSG00000151846 | validated |
| tarbase | hsa-miR-18a-5p  | TMEM267  | 64417  | ENSG00000151881 | validated |
| tarbase | hsa-miR-15b-5p  | GFRA1    | 2674   | ENSG00000151892 | validated |
| tarbase | hsa-miR-106b-5p | DST      | 667    | ENSG00000151914 | validated |
| tarbase | hsa-miR-181a-5p | DST      | 667    | ENSG00000151914 | validated |
| tarbase | hsa-miR-222-3p  | DST      | 667    | ENSG00000151914 | validated |

|         |                 |          |        |                 |           |
|---------|-----------------|----------|--------|-----------------|-----------|
| tarbase | hsa-miR-301a-3p | DST      | 667    | ENSG00000151914 | validated |
| tarbase | hsa-miR-505-3p  | DST      | 667    | ENSG00000151914 | validated |
| tarbase | hsa-miR-582-3p  | DST      | 667    | ENSG00000151914 | validated |
| tarbase | hsa-miR-222-3p  | BAG3     | 9531   | ENSG00000151929 | validated |
| tarbase | hsa-miR-181a-5p | AP1S3    | 130340 | ENSG00000152056 | validated |
| tarbase | hsa-miR-144-3p  | RABGAP1L | 9910   | ENSG00000152061 | validated |
| tarbase | hsa-miR-212-3p  | RABGAP1L | 9910   | ENSG00000152061 | validated |
| tarbase | hsa-miR-106b-5p | TLCD4    | 148534 | ENSG00000152078 | validated |
| tarbase | hsa-miR-181a-5p | TLCD4    | 148534 | ENSG00000152078 | validated |
| tarbase | hsa-miR-181a-5p | FAM168B  | 130074 | ENSG00000152102 | validated |
| tarbase | hsa-miR-222-3p  | FAM168B  | 130074 | ENSG00000152102 | validated |
| tarbase | hsa-miR-582-3p  | PTPN14   | 5784   | ENSG00000152104 | validated |
| tarbase | hsa-miR-326     | GEMIN6   | 79833  | ENSG00000152147 | validated |
| tarbase | hsa-miR-106b-5p | OBI1     | 79596  | ENSG00000152193 | validated |
| tarbase | hsa-miR-222-3p  | OBI1     | 79596  | ENSG00000152193 | validated |
| tarbase | hsa-miR-301a-3p | OBI1     | 79596  | ENSG00000152193 | validated |
| tarbase | hsa-miR-212-3p  | SETBP1   | 26040  | ENSG00000152217 | validated |
| tarbase | hsa-miR-21-5p   | ARL14EP  | 120534 | ENSG00000152219 | validated |
| tarbase | hsa-miR-15b-5p  | EPG5     | 57724  | ENSG00000152223 | validated |
| tarbase | hsa-miR-301a-3p | EPG5     | 57724  | ENSG00000152223 | validated |
| tarbase | hsa-miR-181a-5p | ATP5F1A  | 498    | ENSG00000152234 | validated |
| tarbase | hsa-miR-301a-3p | C18orf25 | 147339 | ENSG00000152242 | validated |
| tarbase | hsa-miR-106b-5p | SPC25    | 57405  | ENSG00000152253 | validated |
| tarbase | hsa-miR-106b-5p | TCF7L1   | 83439  | ENSG00000152284 | validated |
| tarbase | hsa-miR-181a-5p | TGOLN2   | 10618  | ENSG00000152291 | validated |
| tarbase | hsa-miR-21-5p   | TGOLN2   | 10618  | ENSG00000152291 | validated |
| tarbase | hsa-miR-301a-3p | TGOLN2   | 10618  | ENSG00000152291 | validated |
| tarbase | hsa-miR-212-3p  | SH2D6    | 284948 | ENSG00000152292 | validated |
| tarbase | hsa-miR-106b-5p | UHMK1    | 127933 | ENSG00000152332 | validated |
| tarbase | hsa-miR-144-3p  | UHMK1    | 127933 | ENSG00000152332 | validated |
| tarbase | hsa-miR-15b-5p  | UHMK1    | 127933 | ENSG00000152332 | validated |
| tarbase | hsa-miR-181a-5p | UHMK1    | 127933 | ENSG00000152332 | validated |
| tarbase | hsa-miR-18a-5p  | UHMK1    | 127933 | ENSG00000152332 | validated |
| tarbase | hsa-miR-21-5p   | UHMK1    | 127933 | ENSG00000152332 | validated |
| tarbase | hsa-miR-301a-3p | UHMK1    | 127933 | ENSG00000152332 | validated |
| tarbase | hsa-miR-582-5p  | UHMK1    | 127933 | ENSG00000152332 | validated |
| tarbase | hsa-miR-181a-5p | SPOCK1   | 6695   | ENSG00000152377 | validated |
| tarbase | hsa-miR-582-3p  | TADA1    | 117143 | ENSG00000152382 | validated |
| tarbase | hsa-miR-15b-5p  | GUCY1A2  | 2977   | ENSG00000152402 | validated |
| tarbase | hsa-miR-181a-5p | GUCY1A2  | 2977   | ENSG00000152402 | validated |
| tarbase | hsa-miR-106b-5p | JMY      | 133746 | ENSG00000152409 | validated |
| tarbase | hsa-miR-212-3p  | ZNF547   | 284306 | ENSG00000152433 | validated |
| tarbase | hsa-miR-181a-5p | ZNF776   | 284309 | ENSG00000152443 | validated |
| tarbase | hsa-miR-18a-5p  | ZNF776   | 284309 | ENSG00000152443 | validated |
| tarbase | hsa-miR-212-3p  | ZSCAN1   | 284312 | ENSG00000152467 | validated |
| tarbase | hsa-miR-106b-5p | CCDC50   | 152137 | ENSG00000152492 | validated |
| tarbase | hsa-miR-181a-5p | CCDC50   | 152137 | ENSG00000152492 | validated |
| tarbase | hsa-miR-181a-5p | CAMK4    | 814    | ENSG00000152495 | validated |
| tarbase | hsa-miR-582-3p  | CAMK4    | 814    | ENSG00000152495 | validated |
| tarbase | hsa-miR-15b-5p  | TRIM36   | 55521  | ENSG00000152503 | validated |
| tarbase | hsa-miR-222-3p  | ZFP36L2  | 678    | ENSG00000152518 | validated |
| tarbase | hsa-miR-212-3p  | PAN3     | 255967 | ENSG00000152520 | validated |
| tarbase | hsa-miR-301a-3p | PAN3     | 255967 | ENSG00000152520 | validated |
| tarbase | hsa-miR-15b-5p  | TMEM123  | 114908 | ENSG00000152558 | validated |
| tarbase | hsa-miR-181a-5p | TMEM123  | 114908 | ENSG00000152558 | validated |
| tarbase | hsa-miR-106b-5p | MBNL1    | 4154   | ENSG00000152601 | validated |
| tarbase | hsa-miR-181a-5p | MBNL1    | 4154   | ENSG00000152601 | validated |
| tarbase | hsa-miR-18a-5p  | MBNL1    | 4154   | ENSG00000152601 | validated |
| tarbase | hsa-miR-212-3p  | MBNL1    | 4154   | ENSG00000152601 | validated |
| tarbase | hsa-miR-222-3p  | MBNL1    | 4154   | ENSG00000152601 | validated |
| tarbase | hsa-miR-15b-5p  | MBNL1    | 4154   | ENSG00000152601 | validated |
| tarbase | hsa-miR-21-5p   | NADK2    | 133686 | ENSG00000152620 | validated |
| tarbase | hsa-miR-181a-5p | SLC30A6  | 55676  | ENSG00000152683 | validated |
| tarbase | hsa-miR-582-3p  | SLC30A6  | 55676  | ENSG00000152683 | validated |
| tarbase | hsa-miR-106b-5p | PELO     | 53918  | ENSG00000152684 | validated |
| tarbase | hsa-miR-106b-5p | SAR1B    | 51128  | ENSG00000152700 | validated |
| tarbase | hsa-miR-15b-5p  | SAR1B    | 51128  | ENSG00000152700 | validated |
| tarbase | hsa-miR-301a-3p | SAR1B    | 51128  | ENSG00000152700 | validated |
| tarbase | hsa-miR-212-3p  | CATSPER3 | 347732 | ENSG00000152705 | validated |
| tarbase | hsa-miR-212-3p  | WDR78    | 79819  | ENSG00000152763 | validated |
| tarbase | hsa-miR-212-3p  | IFIT5    | 24138  | ENSG00000152778 | validated |

|         |                 |          |        |                 |           |
|---------|-----------------|----------|--------|-----------------|-----------|
| tarbase | hsa-miR-181a-5p | PANK1    | 53354  | ENSG00000152782 | validated |
| tarbase | hsa-miR-212-3p  | PANK1    | 53354  | ENSG00000152782 | validated |
| tarbase | hsa-miR-181a-5p | HNRNPDL  | 9987   | ENSG00000152795 | validated |
| tarbase | hsa-miR-582-5p  | HNRNPDL  | 9987   | ENSG00000152795 | validated |
| tarbase | hsa-miR-212-3p  | GRM1     | 2911   | ENSG00000152822 | validated |
| tarbase | hsa-miR-181a-5p | GGPS1    | 9453   | ENSG00000152904 | validated |
| tarbase | hsa-miR-15b-5p  | CNTNAP4  | 85445  | ENSG00000152910 | validated |
| tarbase | hsa-miR-181a-5p | RAB3C    | 115827 | ENSG00000152932 | validated |
| tarbase | hsa-miR-21-5p   | MED21    | 9412   | ENSG00000152944 | validated |
| tarbase | hsa-miR-301a-3p | MED21    | 9412   | ENSG00000152944 | validated |
| tarbase | hsa-miR-582-3p  | MED21    | 9412   | ENSG00000152944 | validated |
| tarbase | hsa-miR-301a-3p | PLOD2    | 5352   | ENSG00000152952 | validated |
| tarbase | hsa-miR-505-3p  | PLOD2    | 5352   | ENSG00000152952 | validated |
| tarbase | hsa-miR-21-5p   | SREK1IP1 | 285672 | ENSG00000153006 | validated |
| tarbase | hsa-miR-212-3p  | BCL2L11  | 10018  | ENSG00000153094 | validated |
| tarbase | hsa-miR-582-5p  | BCL2L11  | 10018  | ENSG00000153094 | validated |
| tarbase | hsa-miR-106b-5p | CETN3    | 1070   | ENSG00000153140 | validated |
| tarbase | hsa-miR-15b-5p  | SMARCA5  | 8467   | ENSG00000153147 | validated |
| tarbase | hsa-miR-18a-5p  | SMARCA5  | 8467   | ENSG00000153147 | validated |
| tarbase | hsa-miR-222-3p  | SMARCA5  | 8467   | ENSG00000153147 | validated |
| tarbase | hsa-miR-296-5p  | SMARCA5  | 8467   | ENSG00000153147 | validated |
| tarbase | hsa-miR-106b-5p | SMARCA5  | 8467   | ENSG00000153147 | validated |
| tarbase | hsa-miR-192-5p  | BMP6     | 654    | ENSG00000153162 | validated |
| tarbase | hsa-miR-301a-3p | BMP6     | 654    | ENSG00000153162 | validated |
| tarbase | hsa-miR-106b-5p | RASSF3   | 283349 | ENSG00000153179 | validated |
| tarbase | hsa-miR-222-3p  | RASSF3   | 283349 | ENSG00000153179 | validated |
| tarbase | hsa-miR-582-5p  | RASSF3   | 283349 | ENSG00000153179 | validated |
| tarbase | hsa-miR-106b-5p | HNRNPU   | 3192   | ENSG00000153187 | validated |
| tarbase | hsa-miR-15b-5p  | HNRNPU   | 3192   | ENSG00000153187 | validated |
| tarbase | hsa-miR-181a-5p | HNRNPU   | 3192   | ENSG00000153187 | validated |
| tarbase | hsa-miR-21-5p   | HNRNPU   | 3192   | ENSG00000153187 | validated |
| tarbase | hsa-miR-222-3p  | HNRNPU   | 3192   | ENSG00000153187 | validated |
| tarbase | hsa-miR-296-5p  | HNRNPU   | 3192   | ENSG00000153187 | validated |
| tarbase | hsa-miR-326     | HNRNPU   | 3192   | ENSG00000153187 | validated |
| tarbase | hsa-miR-106b-5p | RANBP2   | 5903   | ENSG00000153201 | validated |
| tarbase | hsa-miR-15b-5p  | RANBP2   | 5903   | ENSG00000153201 | validated |
| tarbase | hsa-miR-181a-5p | RANBP2   | 5903   | ENSG00000153201 | validated |
| tarbase | hsa-miR-582-5p  | RANBP2   | 5903   | ENSG00000153201 | validated |
| tarbase | hsa-miR-106b-5p | AHCTF1   | 25909  | ENSG00000153207 | validated |
| tarbase | hsa-miR-15b-5p  | AHCTF1   | 25909  | ENSG00000153207 | validated |
| tarbase | hsa-miR-181a-5p | AHCTF1   | 25909  | ENSG00000153207 | validated |
| tarbase | hsa-miR-181a-5p | MERTK    | 10461  | ENSG00000153208 | validated |
| tarbase | hsa-miR-15b-5p  | TMEM87B  | 84910  | ENSG00000153214 | validated |
| tarbase | hsa-miR-181a-5p | TMEM87B  | 84910  | ENSG00000153214 | validated |
| tarbase | hsa-miR-18a-5p  | TMEM87B  | 84910  | ENSG00000153214 | validated |
| tarbase | hsa-miR-212-3p  | TMEM87B  | 84910  | ENSG00000153214 | validated |
| tarbase | hsa-miR-181a-5p | NR4A2    | 4929   | ENSG00000153234 | validated |
| tarbase | hsa-miR-212-3p  | NR4A2    | 4929   | ENSG00000153234 | validated |
| tarbase | hsa-miR-212-3p  | CCDC148  | 130940 | ENSG00000153237 | validated |
| tarbase | hsa-miR-144-3p  | PLA2R1   | 22925  | ENSG00000153246 | validated |
| tarbase | hsa-miR-106b-5p | RBMS1    | 5937   | ENSG00000153250 | validated |
| tarbase | hsa-miR-15b-5p  | RBMS1    | 5937   | ENSG00000153250 | validated |
| tarbase | hsa-miR-181a-5p | RBMS1    | 5937   | ENSG00000153250 | validated |
| tarbase | hsa-miR-21-5p   | RBMS1    | 5937   | ENSG00000153250 | validated |
| tarbase | hsa-miR-222-3p  | RBMS1    | 5937   | ENSG00000153250 | validated |
| tarbase | hsa-miR-181a-5p | CD96     | 10225  | ENSG00000153283 | validated |
| tarbase | hsa-miR-181a-5p | SLC25A27 | 9481   | ENSG00000153291 | validated |
| tarbase | hsa-miR-181a-5p | FAM49B   | 51571  | ENSG00000153310 | validated |
| tarbase | hsa-miR-192-5p  | FAM49B   | 51571  | ENSG00000153310 | validated |
| tarbase | hsa-miR-15b-5p  | ASAP1    | 50807  | ENSG00000153317 | validated |
| tarbase | hsa-miR-301a-3p | ASAP1    | 50807  | ENSG00000153317 | validated |
| tarbase | hsa-miR-222-3p  | LPCAT1   | 79888  | ENSG00000153395 | validated |
| tarbase | hsa-miR-582-5p  | LPCAT1   | 79888  | ENSG00000153395 | validated |
| tarbase | hsa-miR-15b-5p  | PLEKHG4B | 153478 | ENSG00000153404 | validated |
| tarbase | hsa-miR-212-3p  | CMTM7    | 112616 | ENSG00000153551 | validated |
| tarbase | hsa-miR-181a-5p | UBP1     | 7342   | ENSG00000153560 | validated |
| tarbase | hsa-miR-582-3p  | UBP1     | 7342   | ENSG00000153560 | validated |
| tarbase | hsa-miR-15b-5p  | RMND5A   | 64795  | ENSG00000153561 | validated |
| tarbase | hsa-miR-181a-5p | RMND5A   | 64795  | ENSG00000153561 | validated |
| tarbase | hsa-miR-18a-5p  | RMND5A   | 64795  | ENSG00000153561 | validated |
| tarbase | hsa-miR-326     | RMND5A   | 64795  | ENSG00000153561 | validated |



|         |                 |          |        |                 |           |
|---------|-----------------|----------|--------|-----------------|-----------|
| tarbase | hsa-miR-505-3p  | RMND5A   | 64795  | ENSG00000153561 | validated |
| tarbase | hsa-miR-582-3p  | RMND5A   | 64795  | ENSG00000153561 | validated |
| tarbase | hsa-miR-106b-5p | RPIA     | 22934  | ENSG00000153574 | validated |
| tarbase | hsa-miR-505-3p  | RPIA     | 22934  | ENSG00000153574 | validated |
| tarbase | hsa-miR-106b-5p | PTPRD    | 5789   | ENSG00000153707 | validated |
| tarbase | hsa-miR-301a-3p | PTPRD    | 5789   | ENSG00000153707 | validated |
| tarbase | hsa-miR-21-5p   | LURAP1L  | 286343 | ENSG00000153714 | validated |
| tarbase | hsa-miR-212-3p  | CNKS3    | 154043 | ENSG00000153721 | validated |
| tarbase | hsa-miR-301a-3p | CNKS3    | 154043 | ENSG00000153721 | validated |
| tarbase | hsa-miR-181a-5p | ZDHHC7   | 55625  | ENSG00000153786 | validated |
| tarbase | hsa-miR-212-3p  | ZDHHC7   | 55625  | ENSG00000153786 | validated |
| tarbase | hsa-miR-21-5p   | ZDHHC7   | 55625  | ENSG00000153786 | validated |
| tarbase | hsa-miR-582-5p  | C7orf31  | 136895 | ENSG00000153790 | validated |
| tarbase | hsa-miR-106b-5p | JAZF1    | 221895 | ENSG00000153814 | validated |
| tarbase | hsa-miR-181a-5p | JAZF1    | 221895 | ENSG00000153814 | validated |
| tarbase | hsa-miR-505-3p  | CMIP     | 80790  | ENSG00000153815 | validated |
| tarbase | hsa-miR-582-3p  | CMIP     | 80790  | ENSG00000153815 | validated |
| tarbase | hsa-miR-582-5p  | CMIP     | 80790  | ENSG00000153815 | validated |
| tarbase | hsa-miR-18a-5p  | CMIP     | 80790  | ENSG00000153815 | validated |
| tarbase | hsa-miR-181a-5p | TRIP12   | 9320   | ENSG00000153827 | validated |
| tarbase | hsa-miR-21-5p   | TRIP12   | 9320   | ENSG00000153827 | validated |
| tarbase | hsa-miR-181a-5p | CEBPG    | 1054   | ENSG00000153879 | validated |
| tarbase | hsa-miR-301a-3p | CEBPG    | 1054   | ENSG00000153879 | validated |
| tarbase | hsa-miR-505-3p  | CEBPG    | 1054   | ENSG00000153879 | validated |
| tarbase | hsa-miR-181a-5p | DDAH1    | 23576  | ENSG00000153904 | validated |
| tarbase | hsa-miR-106b-5p | SREK1    | 140890 | ENSG00000153914 | validated |
| tarbase | hsa-miR-181a-5p | CHD1     | 1105   | ENSG00000153922 | validated |
| tarbase | hsa-miR-582-5p  | CHD1     | 1105   | ENSG00000153922 | validated |
| tarbase | hsa-miR-326     | DGKE     | 8526   | ENSG00000153933 | validated |
| tarbase | hsa-miR-582-5p  | HS2ST1   | 9653   | ENSG00000153936 | validated |
| tarbase | hsa-miR-106b-5p | MSI2     | 124540 | ENSG00000153944 | validated |
| tarbase | hsa-miR-15b-5p  | MSI2     | 124540 | ENSG00000153944 | validated |
| tarbase | hsa-miR-181a-5p | MSI2     | 124540 | ENSG00000153944 | validated |
| tarbase | hsa-miR-21-5p   | MSI2     | 124540 | ENSG00000153944 | validated |
| tarbase | hsa-miR-15b-5p  | CACNA2D1 | 781    | ENSG00000153956 | validated |
| tarbase | hsa-miR-106b-5p | ANKRD29  | 147463 | ENSG00000154065 | validated |
| tarbase | hsa-miR-582-5p  | ANKRD29  | 147463 | ENSG00000154065 | validated |
| tarbase | hsa-miR-296-5p  | THY1     | 7070   | ENSG00000154096 | validated |
| tarbase | hsa-miR-106b-5p | TBCEL    | 219899 | ENSG00000154114 | validated |
| tarbase | hsa-miR-21-5p   | TBCEL    | 219899 | ENSG00000154114 | validated |
| tarbase | hsa-miR-15b-5p  | TBCEL    | 219899 | ENSG00000154114 | validated |
| tarbase | hsa-miR-181a-5p | TBCEL    | 219899 | ENSG00000154114 | validated |
| tarbase | hsa-miR-15b-5p  | ANKH     | 56172  | ENSG00000154122 | validated |
| tarbase | hsa-miR-106b-5p | OTULIN   | 90268  | ENSG00000154124 | validated |
| tarbase | hsa-miR-582-5p  | OTULIN   | 90268  | ENSG00000154124 | validated |
| tarbase | hsa-miR-296-5p  | UBASH3B  | 84959  | ENSG00000154127 | validated |
| tarbase | hsa-miR-582-3p  | RETREG1  | 54463  | ENSG00000154153 | validated |
| tarbase | hsa-miR-212-3p  | CDH12    | 1010   | ENSG00000154162 | validated |
| tarbase | hsa-miR-181a-5p | TOMM70   | 9868   | ENSG00000154174 | validated |
| tarbase | hsa-miR-18a-5p  | TOMM70   | 9868   | ENSG00000154174 | validated |
| tarbase | hsa-miR-21-5p   | TOMM70   | 9868   | ENSG00000154174 | validated |
| tarbase | hsa-miR-181a-5p | ABI3BP   | 25890  | ENSG00000154175 | validated |
| tarbase | hsa-miR-212-3p  | ANGPT1   | 284    | ENSG00000154188 | validated |
| tarbase | hsa-miR-15b-5p  | CC2D1B   | 200014 | ENSG00000154222 | validated |
| tarbase | hsa-miR-212-3p  | CC2D1B   | 200014 | ENSG00000154222 | validated |
| tarbase | hsa-miR-301a-3p | CC2D1B   | 200014 | ENSG00000154222 | validated |
| tarbase | hsa-miR-326     | CC2D1B   | 200014 | ENSG00000154222 | validated |
| tarbase | hsa-miR-582-3p  | PRKCA    | 5578   | ENSG00000154229 | validated |
| tarbase | hsa-miR-15b-5p  | LRRK1    | 79705  | ENSG00000154237 | validated |
| tarbase | hsa-miR-144-3p  | ABCA5    | 23461  | ENSG00000154265 | validated |
| tarbase | hsa-miR-15b-5p  | MIA3     | 375056 | ENSG00000154305 | validated |
| tarbase | hsa-miR-18a-5p  | MIA3     | 375056 | ENSG00000154305 | validated |
| tarbase | hsa-miR-21-5p   | MIA3     | 375056 | ENSG00000154305 | validated |
| tarbase | hsa-miR-222-3p  | MIA3     | 375056 | ENSG00000154305 | validated |
| tarbase | hsa-miR-582-3p  | DISP1    | 84976  | ENSG00000154309 | validated |
| tarbase | hsa-miR-106b-5p | FAM167A  | 83648  | ENSG00000154319 | validated |
| tarbase | hsa-miR-212-3p  | FAM167A  | 83648  | ENSG00000154319 | validated |
| tarbase | hsa-miR-296-5p  | FAM167A  | 83648  | ENSG00000154319 | validated |
| tarbase | hsa-miR-15b-5p  | WNT3A    | 89780  | ENSG00000154342 | validated |
| tarbase | hsa-miR-192-5p  | OBSCN    | 84033  | ENSG00000154358 | validated |
| tarbase | hsa-miR-301a-3p | TRIM11   | 81559  | ENSG00000154370 | validated |

|         |                 |          |        |                 |           |
|---------|-----------------|----------|--------|-----------------|-----------|
| tarbase | hsa-miR-326     | TRIM11   | 81559  | ENSG00000154370 | validated |
| tarbase | hsa-miR-15b-5p  | ENAH     | 55740  | ENSG00000154380 | validated |
| tarbase | hsa-miR-106b-5p | CCSAP    | 126731 | ENSG00000154429 | validated |
| tarbase | hsa-miR-181a-5p | CCSAP    | 126731 | ENSG00000154429 | validated |
| tarbase | hsa-miR-106b-5p | SH3RF1   | 57630  | ENSG00000154447 | validated |
| tarbase | hsa-miR-15b-5p  | BUB3     | 9184   | ENSG00000154473 | validated |
| tarbase | hsa-miR-181a-5p | BUB3     | 9184   | ENSG00000154473 | validated |
| tarbase | hsa-miR-582-3p  | BUB3     | 9184   | ENSG00000154473 | validated |
| tarbase | hsa-miR-222-3p  | BUB3     | 9184   | ENSG00000154473 | validated |
| tarbase | hsa-miR-212-3p  | CCDC173  | 129881 | ENSG00000154479 | validated |
| tarbase | hsa-miR-18a-5p  | DIPK1A   | 388650 | ENSG00000154511 | validated |
| tarbase | hsa-miR-582-5p  | DIPK1A   | 388650 | ENSG00000154511 | validated |
| tarbase | hsa-miR-21-5p   | ATP5MC3  | 518    | ENSG00000154518 | validated |
| tarbase | hsa-miR-582-5p  | ATP5MC3  | 518    | ENSG00000154518 | validated |
| tarbase | hsa-miR-181a-5p | ELOC     | 6921   | ENSG00000154582 | validated |
| tarbase | hsa-miR-301a-3p | ELOC     | 6921   | ENSG00000154582 | validated |
| tarbase | hsa-miR-181a-5p | BTG3     | 10950  | ENSG00000154640 | validated |
| tarbase | hsa-miR-18a-5p  | BTG3     | 10950  | ENSG00000154640 | validated |
| tarbase | hsa-miR-18a-5p  | ATP5PF   | 522    | ENSG00000154723 | validated |
| tarbase | hsa-miR-21-5p   | GABPA    | 2551   | ENSG00000154727 | validated |
| tarbase | hsa-miR-106b-5p | ADAMTS1  | 9510   | ENSG00000154734 | validated |
| tarbase | hsa-miR-181a-5p | ADAMTS1  | 9510   | ENSG00000154734 | validated |
| tarbase | hsa-miR-212-3p  | ADAMTS1  | 9510   | ENSG00000154734 | validated |
| tarbase | hsa-miR-582-3p  | ADAMTS1  | 9510   | ENSG00000154734 | validated |
| tarbase | hsa-miR-106b-5p | ADAMTS5  | 11096  | ENSG00000154736 | validated |
| tarbase | hsa-miR-15b-5p  | ADAMTS5  | 11096  | ENSG00000154736 | validated |
| tarbase | hsa-miR-181a-5p | ADAMTS5  | 11096  | ENSG00000154736 | validated |
| tarbase | hsa-miR-21-5p   | TSEN2    | 80746  | ENSG00000154743 | validated |
| tarbase | hsa-miR-18a-5p  | OXNAD1   | 92106  | ENSG00000154814 | validated |
| tarbase | hsa-miR-301a-3p | PLCL2    | 23228  | ENSG00000154822 | validated |
| tarbase | hsa-miR-181a-5p | RAB6B    | 51560  | ENSG00000154917 | validated |
| tarbase | hsa-miR-15b-5p  | ANKRD40  | 91369  | ENSG00000154945 | validated |
| tarbase | hsa-miR-192-5p  | ANKRD40  | 91369  | ENSG00000154945 | validated |
| tarbase | hsa-miR-212-3p  | ANKRD40  | 91369  | ENSG00000154945 | validated |
| tarbase | hsa-miR-106b-5p | ZNF18    | 7566   | ENSG00000154957 | validated |
| tarbase | hsa-miR-106b-5p | APOOL    | 139322 | ENSG00000155008 | validated |
| tarbase | hsa-miR-582-3p  | APOOL    | 139322 | ENSG00000155008 | validated |
| tarbase | hsa-miR-106b-5p | CYP2U1   | 113612 | ENSG00000155016 | validated |
| tarbase | hsa-miR-212-3p  | AK9      | 221264 | ENSG00000155085 | validated |
| tarbase | hsa-miR-144-3p  | KLF10    | 7071   | ENSG00000155090 | validated |
| tarbase | hsa-miR-18a-5p  | KLF10    | 7071   | ENSG00000155090 | validated |
| tarbase | hsa-miR-296-5p  | KLF10    | 7071   | ENSG00000155090 | validated |
| tarbase | hsa-miR-582-5p  | KLF10    | 7071   | ENSG00000155090 | validated |
| tarbase | hsa-miR-15b-5p  | PTPRN2   | 5799   | ENSG00000155093 | validated |
| tarbase | hsa-miR-15b-5p  | AZIN1    | 51582  | ENSG00000155096 | validated |
| tarbase | hsa-miR-181a-5p | AZIN1    | 51582  | ENSG00000155096 | validated |
| tarbase | hsa-miR-212-3p  | AZIN1    | 51582  | ENSG00000155096 | validated |
| tarbase | hsa-miR-21-5p   | AZIN1    | 51582  | ENSG00000155096 | validated |
| tarbase | hsa-miR-181a-5p | ATP6V1C1 | 528    | ENSG00000155097 | validated |
| tarbase | hsa-miR-18a-5p  | ATP6V1C1 | 528    | ENSG00000155097 | validated |
| tarbase | hsa-miR-144-3p  | PIP4P2   | 55529  | ENSG00000155099 | validated |
| tarbase | hsa-miR-15b-5p  | PIP4P2   | 55529  | ENSG00000155099 | validated |
| tarbase | hsa-miR-301a-3p | PIP4P2   | 55529  | ENSG00000155099 | validated |
| tarbase | hsa-miR-582-5p  | PIP4P2   | 55529  | ENSG00000155099 | validated |
| tarbase | hsa-miR-181a-5p | OTUD6B   | 51633  | ENSG00000155100 | validated |
| tarbase | hsa-miR-18a-5p  | OTUD6B   | 51633  | ENSG00000155100 | validated |
| tarbase | hsa-miR-21-5p   | OTUD6B   | 51633  | ENSG00000155100 | validated |
| tarbase | hsa-miR-15b-5p  | TTC39B   | 158219 | ENSG00000155158 | validated |
| tarbase | hsa-miR-144-3p  | AGPAT5   | 55326  | ENSG00000155189 | validated |
| tarbase | hsa-miR-21-5p   | AGPAT5   | 55326  | ENSG00000155189 | validated |
| tarbase | hsa-miR-15b-5p  | MMS19    | 64210  | ENSG00000155229 | validated |
| tarbase | hsa-miR-18a-5p  | PI4K2A   | 55361  | ENSG00000155252 | validated |
| tarbase | hsa-miR-582-3p  | ZFYVE27  | 118813 | ENSG00000155256 | validated |
| tarbase | hsa-miR-106b-5p | SLC25A28 | 81894  | ENSG00000155287 | validated |
| tarbase | hsa-miR-326     | SLC25A28 | 81894  | ENSG00000155287 | validated |
| tarbase | hsa-miR-18a-5p  | HSPA13   | 6782   | ENSG00000155304 | validated |
| tarbase | hsa-miR-106b-5p | HSPA13   | 6782   | ENSG00000155304 | validated |
| tarbase | hsa-miR-15b-5p  | USP25    | 29761  | ENSG00000155313 | validated |
| tarbase | hsa-miR-106b-5p | USP25    | 29761  | ENSG00000155313 | validated |
| tarbase | hsa-miR-505-3p  | GRAMD2B  | 65983  | ENSG00000155324 | validated |
| tarbase | hsa-miR-222-3p  | ZCCHC10  | 54819  | ENSG00000155329 | validated |

|         |                 |          |        |                 |           |
|---------|-----------------|----------|--------|-----------------|-----------|
| tarbase | hsa-miR-106b-5p | C16orf87 | 388272 | ENSG00000155330 | validated |
| tarbase | hsa-miR-181a-5p | C16orf87 | 388272 | ENSG00000155330 | validated |
| tarbase | hsa-miR-18a-5p  | MOV10    | 4343   | ENSG00000155363 | validated |
| tarbase | hsa-miR-212-3p  | MOV10    | 4343   | ENSG00000155363 | validated |
| tarbase | hsa-miR-296-5p  | RHOC     | 389    | ENSG00000155366 | validated |
| tarbase | hsa-miR-18a-5p  | SLC16A1  | 6566   | ENSG00000155380 | validated |
| tarbase | hsa-miR-21-5p   | SLC16A1  | 6566   | ENSG00000155380 | validated |
| tarbase | hsa-miR-505-3p  | SLC16A1  | 6566   | ENSG00000155380 | validated |
| tarbase | hsa-miR-582-3p  | SLC16A1  | 6566   | ENSG00000155380 | validated |
| tarbase | hsa-miR-582-5p  | SLC16A1  | 6566   | ENSG00000155380 | validated |
| tarbase | hsa-miR-106b-5p | SLC16A1  | 6566   | ENSG00000155380 | validated |
| tarbase | hsa-miR-15b-5p  | SLC16A1  | 6566   | ENSG00000155380 | validated |
| tarbase | hsa-miR-505-3p  | NIFK     | 84365  | ENSG00000155438 | validated |
| tarbase | hsa-miR-106b-5p | OXA1L    | 5018   | ENSG00000155463 | validated |
| tarbase | hsa-miR-301a-3p | OXA1L    | 5018   | ENSG00000155463 | validated |
| tarbase | hsa-miR-106b-5p | SLC7A7   | 9056   | ENSG00000155465 | validated |
| tarbase | hsa-miR-106b-5p | LARP1    | 23367  | ENSG00000155506 | validated |
| tarbase | hsa-miR-15b-5p  | LARP1    | 23367  | ENSG00000155506 | validated |
| tarbase | hsa-miR-18a-5p  | LARP1    | 23367  | ENSG00000155506 | validated |
| tarbase | hsa-miR-21-5p   | LARP1    | 23367  | ENSG00000155506 | validated |
| tarbase | hsa-miR-296-5p  | LARP1    | 23367  | ENSG00000155506 | validated |
| tarbase | hsa-miR-326     | LARP1    | 23367  | ENSG00000155506 | validated |
| tarbase | hsa-miR-15b-5p  | CNOT8    | 9337   | ENSG00000155508 | validated |
| tarbase | hsa-miR-301a-3p | CNOT8    | 9337   | ENSG00000155508 | validated |
| tarbase | hsa-miR-106b-5p | MIER3    | 166968 | ENSG00000155545 | validated |
| tarbase | hsa-miR-181a-5p | MIER3    | 166968 | ENSG00000155545 | validated |
| tarbase | hsa-miR-222-3p  | MIER3    | 166968 | ENSG00000155545 | validated |
| tarbase | hsa-miR-301a-3p | MIER3    | 166968 | ENSG00000155545 | validated |
| tarbase | hsa-miR-582-3p  | MIER3    | 166968 | ENSG00000155545 | validated |
| tarbase | hsa-miR-106b-5p | NUP205   | 23165  | ENSG00000155561 | validated |
| tarbase | hsa-miR-21-5p   | NUP205   | 23165  | ENSG00000155561 | validated |
| tarbase | hsa-miR-582-5p  | NUP205   | 23165  | ENSG00000155561 | validated |
| tarbase | hsa-miR-15b-5p  | ZKSCAN2  | 342357 | ENSG00000155592 | validated |
| tarbase | hsa-miR-181a-5p | TTN      | 7273   | ENSG00000155657 | validated |
| tarbase | hsa-miR-582-5p  | TTN      | 7273   | ENSG00000155657 | validated |
| tarbase | hsa-miR-212-3p  | VSIG4    | 11326  | ENSG00000155659 | validated |
| tarbase | hsa-miR-15b-5p  | PDIA4    | 9601   | ENSG00000155660 | validated |
| tarbase | hsa-miR-15b-5p  | FAM126B  | 285172 | ENSG00000155744 | validated |
| tarbase | hsa-miR-181a-5p | FAM126B  | 285172 | ENSG00000155744 | validated |
| tarbase | hsa-miR-212-3p  | FLACC1   | 130540 | ENSG00000155749 | validated |
| tarbase | hsa-miR-106b-5p | FMN2     | 56776  | ENSG00000155816 | validated |
| tarbase | hsa-miR-144-3p  | FMN2     | 56776  | ENSG00000155816 | validated |
| tarbase | hsa-miR-582-5p  | FMN2     | 56776  | ENSG00000155816 | validated |
| tarbase | hsa-miR-212-3p  | FMN2     | 56776  | ENSG00000155816 | validated |
| tarbase | hsa-miR-181a-5p | RNF20    | 56254  | ENSG00000155827 | validated |
| tarbase | hsa-miR-144-3p  | PPARGC1B | 133522 | ENSG00000155846 | validated |
| tarbase | hsa-miR-301a-3p | PPARGC1B | 133522 | ENSG00000155846 | validated |
| tarbase | hsa-miR-106b-5p | MED7     | 9443   | ENSG00000155868 | validated |
| tarbase | hsa-miR-15b-5p  | RRAGA    | 10670  | ENSG00000155876 | validated |
| tarbase | hsa-miR-106b-5p | SLC24A2  | 25769  | ENSG00000155886 | validated |
| tarbase | hsa-miR-15b-5p  | SLC24A2  | 25769  | ENSG00000155886 | validated |
| tarbase | hsa-miR-106b-5p | PXYLP1   | 92370  | ENSG00000155893 | validated |
| tarbase | hsa-miR-15b-5p  | PXYLP1   | 92370  | ENSG00000155893 | validated |
| tarbase | hsa-miR-106b-5p | RASA2    | 5922   | ENSG00000155903 | validated |
| tarbase | hsa-miR-18a-5p  | RASA2    | 5922   | ENSG00000155903 | validated |
| tarbase | hsa-miR-181a-5p | VBP1     | 7411   | ENSG00000155959 | validated |
| tarbase | hsa-miR-21-5p   | CLIC2    | 1193   | ENSG00000155962 | validated |
| tarbase | hsa-miR-181a-5p | MICU3    | 286097 | ENSG00000155970 | validated |
| tarbase | hsa-miR-212-3p  | MICU3    | 286097 | ENSG00000155970 | validated |
| tarbase | hsa-miR-106b-5p | KIF5A    | 3798   | ENSG00000155980 | validated |
| tarbase | hsa-miR-15b-5p  | KIF5A    | 3798   | ENSG00000155980 | validated |
| tarbase | hsa-miR-18a-5p  | KIF5A    | 3798   | ENSG00000155980 | validated |
| tarbase | hsa-miR-326     | KIF5A    | 3798   | ENSG00000155980 | validated |
| tarbase | hsa-miR-106b-5p | PSD3     | 23362  | ENSG00000156011 | validated |
| tarbase | hsa-miR-181a-5p | PSD3     | 23362  | ENSG00000156011 | validated |
| tarbase | hsa-miR-15b-5p  | PSD3     | 23362  | ENSG00000156011 | validated |
| tarbase | hsa-miR-212-3p  | CARNMT1  | 138199 | ENSG00000156017 | validated |
| tarbase | hsa-miR-15b-5p  | ELMSAN1  | 91748  | ENSG00000156030 | validated |
| tarbase | hsa-miR-21-5p   | ELMSAN1  | 91748  | ENSG00000156030 | validated |
| tarbase | hsa-miR-296-5p  | ELMSAN1  | 91748  | ENSG00000156030 | validated |
| tarbase | hsa-miR-15b-5p  | GNAQ     | 2776   | ENSG00000156052 | validated |

|         |                 |           |        |                 |           |
|---------|-----------------|-----------|--------|-----------------|-----------|
| tarbase | hsa-miR-181a-5p | GNAQ      | 2776   | ENSG00000156052 | validated |
| tarbase | hsa-miR-181a-5p | ADK       | 132    | ENSG00000156110 | validated |
| tarbase | hsa-miR-21-5p   | DCK       | 1633   | ENSG00000156136 | validated |
| tarbase | hsa-miR-18a-5p  | NDUFAF6   | 137682 | ENSG00000156170 | validated |
| tarbase | hsa-miR-212-3p  | C8orf37   | 157657 | ENSG00000156172 | validated |
| tarbase | hsa-miR-212-3p  | N6AMT1    | 29104  | ENSG00000156239 | validated |
| tarbase | hsa-miR-21-5p   | CCT8      | 10694  | ENSG00000156261 | validated |
| tarbase | hsa-miR-18a-5p  | NAA11     | 84779  | ENSG00000156269 | validated |
| tarbase | hsa-miR-106b-5p | BACH1     | 571    | ENSG00000156273 | validated |
| tarbase | hsa-miR-15b-5p  | BACH1     | 571    | ENSG00000156273 | validated |
| tarbase | hsa-miR-181a-5p | BACH1     | 571    | ENSG00000156273 | validated |
| tarbase | hsa-miR-18a-5p  | BACH1     | 571    | ENSG00000156273 | validated |
| tarbase | hsa-miR-21-5p   | BACH1     | 571    | ENSG00000156273 | validated |
| tarbase | hsa-miR-582-3p  | BACH1     | 571    | ENSG00000156273 | validated |
| tarbase | hsa-miR-582-5p  | TIAM1     | 7074   | ENSG00000156299 | validated |
| tarbase | hsa-miR-15b-5p  | SCAF4     | 57466  | ENSG00000156304 | validated |
| tarbase | hsa-miR-106b-5p | ANKRD9    | 122416 | ENSG00000156381 | validated |
| tarbase | hsa-miR-106b-5p | SFXN2     | 118980 | ENSG00000156398 | validated |
| tarbase | hsa-miR-15b-5p  | ATP5MPL   | 9556   | ENSG00000156411 | validated |
| tarbase | hsa-miR-192-5p  | PCDH1     | 5097   | ENSG00000156453 | validated |
| tarbase | hsa-miR-212-3p  | PCDH1     | 5097   | ENSG00000156453 | validated |
| tarbase | hsa-miR-106b-5p | PTDSS1    | 9791   | ENSG00000156471 | validated |
| tarbase | hsa-miR-18a-5p  | RPL30     | 6156   | ENSG00000156482 | validated |
| tarbase | hsa-miR-106b-5p | FAM122B   | 159090 | ENSG00000156504 | validated |
| tarbase | hsa-miR-181a-5p | FAM122B   | 159090 | ENSG00000156504 | validated |
| tarbase | hsa-miR-21-5p   | EEF1A1    | 1915   | ENSG00000156508 | validated |
| tarbase | hsa-miR-326     | FBXO43    | 286151 | ENSG00000156509 | validated |
| tarbase | hsa-miR-212-3p  | FBXO43    | 286151 | ENSG00000156509 | validated |
| tarbase | hsa-miR-15b-5p  | HK1       | 3098   | ENSG00000156515 | validated |
| tarbase | hsa-miR-181a-5p | HK1       | 3098   | ENSG00000156515 | validated |
| tarbase | hsa-miR-21-5p   | PHF6      | 84295  | ENSG00000156531 | validated |
| tarbase | hsa-miR-301a-3p | PHF6      | 84295  | ENSG00000156531 | validated |
| tarbase | hsa-miR-106b-5p | CD109     | 135228 | ENSG00000156535 | validated |
| tarbase | hsa-miR-212-3p  | UBE2L6    | 9246   | ENSG00000156587 | validated |
| tarbase | hsa-miR-212-3p  | ZDHHC5    | 25921  | ENSG00000156599 | validated |
| tarbase | hsa-miR-181a-5p | ZFAND3    | 60685  | ENSG00000156639 | validated |
| tarbase | hsa-miR-15b-5p  | NPTN      | 27020  | ENSG00000156642 | validated |
| tarbase | hsa-miR-181a-5p | NPTN      | 27020  | ENSG00000156642 | validated |
| tarbase | hsa-miR-18a-5p  | NPTN      | 27020  | ENSG00000156642 | validated |
| tarbase | hsa-miR-21-5p   | NPTN      | 27020  | ENSG00000156642 | validated |
| tarbase | hsa-miR-296-5p  | NPTN      | 27020  | ENSG00000156642 | validated |
| tarbase | hsa-miR-301a-3p | NPTN      | 27020  | ENSG00000156642 | validated |
| tarbase | hsa-miR-106b-5p | NPTN      | 27020  | ENSG00000156642 | validated |
| tarbase | hsa-miR-15b-5p  | SAMD8     | 142891 | ENSG00000156671 | validated |
| tarbase | hsa-miR-181a-5p | SAMD8     | 142891 | ENSG00000156671 | validated |
| tarbase | hsa-miR-21-5p   | SAMD8     | 142891 | ENSG00000156671 | validated |
| tarbase | hsa-miR-15b-5p  | RAB11FIP1 | 80223  | ENSG00000156675 | validated |
| tarbase | hsa-miR-582-3p  | RAB11FIP1 | 80223  | ENSG00000156675 | validated |
| tarbase | hsa-miR-181a-5p | UNC5D     | 137970 | ENSG00000156687 | validated |
| tarbase | hsa-miR-181a-5p | UTP14A    | 10813  | ENSG00000156697 | validated |
| tarbase | hsa-miR-21-5p   | BAG4      | 9530   | ENSG00000156735 | validated |
| tarbase | hsa-miR-212-3p  | FBRS      | 64319  | ENSG00000156860 | validated |
| tarbase | hsa-miR-582-3p  | FBRS      | 64319  | ENSG00000156860 | validated |
| tarbase | hsa-miR-106b-5p | MFSD14A   | 64645  | ENSG00000156875 | validated |
| tarbase | hsa-miR-15b-5p  | MFSD14A   | 64645  | ENSG00000156875 | validated |
| tarbase | hsa-miR-21-5p   | MFSD14A   | 64645  | ENSG00000156875 | validated |
| tarbase | hsa-miR-301a-3p | MFSD14A   | 64645  | ENSG00000156875 | validated |
| tarbase | hsa-miR-582-3p  | MFSD14A   | 64645  | ENSG00000156875 | validated |
| tarbase | hsa-miR-18a-5p  | MFSD14A   | 64645  | ENSG00000156875 | validated |
| tarbase | hsa-miR-222-3p  | BUB1B     | 701    | ENSG00000156970 | validated |
| tarbase | hsa-miR-15b-5p  | EIF4A2    | 1974   | ENSG00000156976 | validated |
| tarbase | hsa-miR-181a-5p | EIF4A2    | 1974   | ENSG00000156976 | validated |
| tarbase | hsa-miR-212-3p  | EIF4A2    | 1974   | ENSG00000156976 | validated |
| tarbase | hsa-miR-582-5p  | SST       | 6750   | ENSG00000157005 | validated |
| tarbase | hsa-miR-15b-5p  | TATDN2    | 9797   | ENSG00000157014 | validated |
| tarbase | hsa-miR-18a-5p  | TATDN2    | 9797   | ENSG00000157014 | validated |
| tarbase | hsa-miR-106b-5p | ATP2B2    | 491    | ENSG00000157087 | validated |
| tarbase | hsa-miR-21-5p   | SMG1      | 23049  | ENSG00000157106 | validated |
| tarbase | hsa-miR-301a-3p | SMG1      | 23049  | ENSG00000157106 | validated |
| tarbase | hsa-miR-582-3p  | SMG1      | 23049  | ENSG00000157106 | validated |
| tarbase | hsa-miR-212-3p  | TIMP4     | 7079   | ENSG00000157150 | validated |

|         |                 |            |        |                 |           |
|---------|-----------------|------------|--------|-----------------|-----------|
| tarbase | hsa-miR-106b-5p | ODR4       | 54953  | ENSG00000157181 | validated |
| tarbase | hsa-miR-18a-5p  | CPT2       | 1376   | ENSG00000157184 | validated |
| tarbase | hsa-miR-301a-3p | LRP8       | 7804   | ENSG00000157193 | validated |
| tarbase | hsa-miR-144-3p  | STEAP2     | 261729 | ENSG00000157214 | validated |
| tarbase | hsa-miR-212-3p  | ARSL       | 415    | ENSG00000157399 | validated |
| tarbase | hsa-miR-18a-5p  | KIT        | 3815   | ENSG00000157404 | validated |
| tarbase | hsa-miR-181a-5p | KIT        | 3815   | ENSG00000157404 | validated |
| tarbase | hsa-miR-106b-5p | ZNF19      | 7567   | ENSG00000157429 | validated |
| tarbase | hsa-miR-15b-5p  | CACNA2D3   | 55799  | ENSG00000157445 | validated |
| tarbase | hsa-miR-212-3p  | CACNA2D3   | 55799  | ENSG00000157445 | validated |
| tarbase | hsa-miR-106b-5p | APPL1      | 26060  | ENSG00000157500 | validated |
| tarbase | hsa-miR-15b-5p  | APPL1      | 26060  | ENSG00000157500 | validated |
| tarbase | hsa-miR-21-5p   | TSC22D3    | 1831   | ENSG00000157514 | validated |
| tarbase | hsa-miR-222-3p  | TSC22D3    | 1831   | ENSG00000157514 | validated |
| tarbase | hsa-miR-106b-5p | TSC22D3    | 1831   | ENSG00000157514 | validated |
| tarbase | hsa-miR-296-5p  | VPS26C     | 10311  | ENSG00000157538 | validated |
| tarbase | hsa-miR-15b-5p  | DYRK1A     | 1859   | ENSG00000157540 | validated |
| tarbase | hsa-miR-222-3p  | DYRK1A     | 1859   | ENSG00000157540 | validated |
| tarbase | hsa-miR-505-3p  | DYRK1A     | 1859   | ENSG00000157540 | validated |
| tarbase | hsa-miR-582-5p  | DYRK1A     | 1859   | ENSG00000157540 | validated |
| tarbase | hsa-miR-181a-5p | ERG        | 2078   | ENSG00000157554 | validated |
| tarbase | hsa-miR-21-5p   | ERG        | 2078   | ENSG00000157554 | validated |
| tarbase | hsa-miR-222-3p  | ETS2       | 2114   | ENSG00000157557 | validated |
| tarbase | hsa-miR-181a-5p | TMEM164    | 84187  | ENSG00000157600 | validated |
| tarbase | hsa-miR-21-5p   | TMEM164    | 84187  | ENSG00000157600 | validated |
| tarbase | hsa-miR-106b-5p | C2CD2      | 25966  | ENSG00000157617 | validated |
| tarbase | hsa-miR-181a-5p | C2CD2      | 25966  | ENSG00000157617 | validated |
| tarbase | hsa-miR-18a-5p  | C2CD2      | 25966  | ENSG00000157617 | validated |
| tarbase | hsa-miR-212-3p  | C2CD2      | 25966  | ENSG00000157617 | validated |
| tarbase | hsa-miR-106b-5p | TAB3       | 257397 | ENSG00000157625 | validated |
| tarbase | hsa-miR-15b-5p  | TAB3       | 257397 | ENSG00000157625 | validated |
| tarbase | hsa-miR-222-3p  | TAB3       | 257397 | ENSG00000157625 | validated |
| tarbase | hsa-miR-296-5p  | SLC38A10   | 124565 | ENSG00000157637 | validated |
| tarbase | hsa-miR-212-3p  | C9orf43    | 257169 | ENSG00000157653 | validated |
| tarbase | hsa-miR-144-3p  | PALM2AKAP2 | 445815 | ENSG00000157654 | validated |
| tarbase | hsa-miR-15b-5p  | PALM2AKAP2 | 445815 | ENSG00000157654 | validated |
| tarbase | hsa-miR-181a-5p | PALM2AKAP2 | 445815 | ENSG00000157654 | validated |
| tarbase | hsa-miR-181a-5p | ZNF618     | 114991 | ENSG00000157657 | validated |
| tarbase | hsa-miR-181a-5p | TMEM268    | 203197 | ENSG00000157693 | validated |
| tarbase | hsa-miR-212-3p  | TMEM268    | 203197 | ENSG00000157693 | validated |
| tarbase | hsa-miR-582-5p  | TMEM268    | 203197 | ENSG00000157693 | validated |
| tarbase | hsa-miR-106b-5p | UBN2       | 254048 | ENSG00000157741 | validated |
| tarbase | hsa-miR-181a-5p | UBN2       | 254048 | ENSG00000157741 | validated |
| tarbase | hsa-miR-505-3p  | UBN2       | 254048 | ENSG00000157741 | validated |
| tarbase | hsa-miR-18a-5p  | UBN2       | 254048 | ENSG00000157741 | validated |
| tarbase | hsa-miR-106b-5p | BRAF       | 673    | ENSG00000157764 | validated |
| tarbase | hsa-miR-18a-5p  | BRAF       | 673    | ENSG00000157764 | validated |
| tarbase | hsa-miR-212-3p  | WDR19      | 57728  | ENSG00000157796 | validated |
| tarbase | hsa-miR-192-5p  | SLC37A3    | 84255  | ENSG00000157800 | validated |
| tarbase | hsa-miR-582-3p  | SLC37A3    | 84255  | ENSG00000157800 | validated |
| tarbase | hsa-miR-144-3p  | FMNL2      | 114793 | ENSG00000157827 | validated |
| tarbase | hsa-miR-181a-5p | FMNL2      | 114793 | ENSG00000157827 | validated |
| tarbase | hsa-miR-212-3p  | GAREM2     | 150946 | ENSG00000157833 | validated |
| tarbase | hsa-miR-296-5p  | SPPL3      | 121665 | ENSG00000157837 | validated |
| tarbase | hsa-miR-21-5p   | SKI        | 6497   | ENSG00000157933 | validated |
| tarbase | hsa-miR-296-5p  | SKI        | 6497   | ENSG00000157933 | validated |
| tarbase | hsa-miR-106b-5p | LDLRAP1    | 26119  | ENSG00000157978 | validated |
| tarbase | hsa-miR-181a-5p | LDLRAP1    | 26119  | ENSG00000157978 | validated |
| tarbase | hsa-miR-181a-5p | AGAP1      | 116987 | ENSG00000157985 | validated |
| tarbase | hsa-miR-15b-5p  | PAFAH2     | 5051   | ENSG00000158006 | validated |
| tarbase | hsa-miR-212-3p  | EXTL1      | 2134   | ENSG00000158008 | validated |
| tarbase | hsa-miR-106b-5p | MRPL17     | 63875  | ENSG00000158042 | validated |
| tarbase | hsa-miR-15b-5p  | DUSP2      | 1844   | ENSG00000158050 | validated |
| tarbase | hsa-miR-296-5p  | DUSP2      | 1844   | ENSG00000158050 | validated |
| tarbase | hsa-miR-212-3p  | GRHL3      | 57822  | ENSG00000158055 | validated |
| tarbase | hsa-miR-15b-5p  | TPRG1L     | 127262 | ENSG00000158109 | validated |
| tarbase | hsa-miR-106b-5p | PRXL2C     | 195827 | ENSG00000158122 | validated |
| tarbase | hsa-miR-222-3p  | CNNM4      | 26504  | ENSG00000158158 | validated |
| tarbase | hsa-miR-181a-5p | EYA3       | 2140   | ENSG00000158161 | validated |
| tarbase | hsa-miR-21-5p   | WASF2      | 10163  | ENSG00000158195 | validated |
| tarbase | hsa-miR-222-3p  | WASF2      | 10163  | ENSG00000158195 | validated |

|         |                 |          |        |                 |           |
|---------|-----------------|----------|--------|-----------------|-----------|
| tarbase | hsa-miR-296-5p  | WASF2    | 10163  | ENSG00000158195 | validated |
| tarbase | hsa-miR-222-3p  | ABHD3    | 171586 | ENSG00000158201 | validated |
| tarbase | hsa-miR-15b-5p  | CUL4B    | 8450   | ENSG00000158290 | validated |
| tarbase | hsa-miR-181a-5p | CUL4B    | 8450   | ENSG00000158290 | validated |
| tarbase | hsa-miR-212-3p  | CUL4B    | 8450   | ENSG00000158290 | validated |
| tarbase | hsa-miR-505-3p  |          |        | ENSG00000158301 | validated |
| tarbase | hsa-miR-106b-5p | AUTS2    | 26053  | ENSG00000158321 | validated |
| tarbase | hsa-miR-15b-5p  | H2BC5    | 3017   | ENSG00000158373 | validated |
| tarbase | hsa-miR-212-3p  | CDC25C   | 995    | ENSG00000158402 | validated |
| tarbase | hsa-miR-212-3p  | H4C8     | 8365   | ENSG00000158406 | validated |
| tarbase | hsa-miR-106b-5p | MITD1    | 129531 | ENSG00000158411 | validated |
| tarbase | hsa-miR-181a-5p | EIF5B    | 9669   | ENSG00000158417 | validated |
| tarbase | hsa-miR-21-5p   | EIF5B    | 9669   | ENSG00000158417 | validated |
| tarbase | hsa-miR-301a-3p | EIF5B    | 9669   | ENSG00000158417 | validated |
| tarbase | hsa-miR-582-5p  | EIF5B    | 9669   | ENSG00000158417 | validated |
| tarbase | hsa-miR-212-3p  | RIBC1    | 158787 | ENSG00000158423 | validated |
| tarbase | hsa-miR-18a-5p  | CNOT11   | 55571  | ENSG00000158435 | validated |
| tarbase | hsa-miR-212-3p  | NRG2     | 9542   | ENSG00000158458 | validated |
| tarbase | hsa-miR-222-3p  | AHCYL2   | 23382  | ENSG00000158467 | validated |
| tarbase | hsa-miR-106b-5p | B4GALT5  | 9334   | ENSG00000158470 | validated |
| tarbase | hsa-miR-181a-5p | B4GALT5  | 9334   | ENSG00000158470 | validated |
| tarbase | hsa-miR-21-5p   | B4GALT5  | 9334   | ENSG00000158470 | validated |
| tarbase | hsa-miR-301a-3p | B4GALT5  | 9334   | ENSG00000158470 | validated |
| tarbase | hsa-miR-15b-5p  | SPATA2   | 9825   | ENSG00000158480 | validated |
| tarbase | hsa-miR-181a-5p | SPATA2   | 9825   | ENSG00000158480 | validated |
| tarbase | hsa-miR-296-5p  | SPATA2   | 9825   | ENSG00000158480 | validated |
| tarbase | hsa-miR-301a-3p | SPATA2   | 9825   | ENSG00000158480 | validated |
| tarbase | hsa-miR-582-3p  | SPATA2   | 9825   | ENSG00000158480 | validated |
| tarbase | hsa-miR-212-3p  | ZFAND2B  | 130617 | ENSG00000158552 | validated |
| tarbase | hsa-miR-15b-5p  | GDPD5    | 81544  | ENSG00000158555 | validated |
| tarbase | hsa-miR-21-5p   | TMED4    | 222068 | ENSG00000158604 | validated |
| tarbase | hsa-miR-301a-3p | TMED4    | 222068 | ENSG00000158604 | validated |
| tarbase | hsa-miR-181a-5p | PPP1R15B | 84919  | ENSG00000158615 | validated |
| tarbase | hsa-miR-18a-5p  | PPP1R15B | 84919  | ENSG00000158615 | validated |
| tarbase | hsa-miR-192-5p  | PPP1R15B | 84919  | ENSG00000158615 | validated |
| tarbase | hsa-miR-212-3p  | PPP1R15B | 84919  | ENSG00000158615 | validated |
| tarbase | hsa-miR-582-3p  | PPP1R15B | 84919  | ENSG00000158615 | validated |
| tarbase | hsa-miR-21-5p   | EMSY     | 56946  | ENSG00000158636 | validated |
| tarbase | hsa-miR-301a-3p | EMSY     | 56946  | ENSG00000158636 | validated |
| tarbase | hsa-miR-106b-5p | TAGLN2   | 8407   | ENSG00000158710 | validated |
| tarbase | hsa-miR-212-3p  | TAGLN2   | 8407   | ENSG00000158710 | validated |
| tarbase | hsa-miR-18a-5p  | ELK4     | 2005   | ENSG00000158711 | validated |
| tarbase | hsa-miR-192-5p  | ELK4     | 2005   | ENSG00000158711 | validated |
| tarbase | hsa-miR-212-3p  | SLAMF8   | 56833  | ENSG00000158714 | validated |
| tarbase | hsa-miR-301a-3p | RNF166   | 115992 | ENSG00000158717 | validated |
| tarbase | hsa-miR-106b-5p | F11R     | 50848  | ENSG00000158769 | validated |
| tarbase | hsa-miR-296-5p  | NIT1     | 4817   | ENSG00000158793 | validated |
| tarbase | hsa-miR-106b-5p | DEDD     | 9191   | ENSG00000158796 | validated |
| tarbase | hsa-miR-212-3p  | DEDD     | 9191   | ENSG00000158796 | validated |
| tarbase | hsa-miR-296-5p  | DEDD     | 9191   | ENSG00000158796 | validated |
| tarbase | hsa-miR-296-5p  | ZNF276   | 92822  | ENSG00000158805 | validated |
| tarbase | hsa-miR-15b-5p  | EDA      | 1896   | ENSG00000158813 | validated |
| tarbase | hsa-miR-15b-5p  | PINK1    | 65018  | ENSG00000158828 | validated |
| tarbase | hsa-miR-106b-5p | NDUFS2   | 4720   | ENSG00000158864 | validated |
| tarbase | hsa-miR-21-5p   | CCAR2    | 57805  | ENSG00000158941 | validated |
| tarbase | hsa-miR-106b-5p | CACHD1   | 57685  | ENSG00000158966 | validated |
| tarbase | hsa-miR-106b-5p | CDC42SE2 | 56990  | ENSG00000158985 | validated |
| tarbase | hsa-miR-144-3p  | CDC42SE2 | 56990  | ENSG00000158985 | validated |
| tarbase | hsa-miR-181a-5p | CDC42SE2 | 56990  | ENSG00000158985 | validated |
| tarbase | hsa-miR-212-3p  | CDC42SE2 | 56990  | ENSG00000158985 | validated |
| tarbase | hsa-miR-582-5p  | CDC42SE2 | 56990  | ENSG00000158985 | validated |
| tarbase | hsa-miR-18a-5p  | RAPGEF6  | 51735  | ENSG00000158987 | validated |
| tarbase | hsa-miR-181a-5p | RAPGEF6  | 51735  | ENSG00000158987 | validated |
| tarbase | hsa-miR-181a-5p | EPB41    | 2035   | ENSG00000159023 | validated |
| tarbase | hsa-miR-212-3p  | FBXW5    | 54461  | ENSG00000159069 | validated |
| tarbase | hsa-miR-301a-3p | IFNAR2   | 3455   | ENSG00000159110 | validated |
| tarbase | hsa-miR-106b-5p | MRPL10   | 124995 | ENSG00000159111 | validated |
| tarbase | hsa-miR-15b-5p  | GART     | 2618   | ENSG00000159131 | validated |
| tarbase | hsa-miR-15b-5p  | SON      | 6651   | ENSG00000159140 | validated |
| tarbase | hsa-miR-181a-5p | SON      | 6651   | ENSG00000159140 | validated |
| tarbase | hsa-miR-212-3p  | SON      | 6651   | ENSG00000159140 | validated |

|         |                 |          |        |                 |           |
|---------|-----------------|----------|--------|-----------------|-----------|
| tarbase | hsa-miR-296-5p  | SON      | 6651   | ENSG00000159140 | validated |
| tarbase | hsa-miR-301a-3p | SON      | 6651   | ENSG00000159140 | validated |
| tarbase | hsa-miR-326     | SON      | 6651   | ENSG00000159140 | validated |
| tarbase | hsa-miR-582-5p  | SON      | 6651   | ENSG00000159140 | validated |
| tarbase | hsa-miR-582-3p  | DONSON   | 29980  | ENSG00000159147 | validated |
| tarbase | hsa-miR-18a-5p  | SV2A     | 9900   | ENSG00000159164 | validated |
| tarbase | hsa-miR-106b-5p | STC1     | 6781   | ENSG00000159167 | validated |
| tarbase | hsa-miR-222-3p  | STC1     | 6781   | ENSG00000159167 | validated |
| tarbase | hsa-miR-301a-3p | STC1     | 6781   | ENSG00000159167 | validated |
| tarbase | hsa-miR-15b-5p  | C1QC     | 714    | ENSG00000159189 | validated |
| tarbase | hsa-miR-106b-5p | RCAN1    | 1827   | ENSG00000159200 | validated |
| tarbase | hsa-miR-212-3p  | RCAN1    | 1827   | ENSG00000159200 | validated |
| tarbase | hsa-miR-144-3p  | UBE2Z    | 65264  | ENSG00000159202 | validated |
| tarbase | hsa-miR-181a-5p | UBE2Z    | 65264  | ENSG00000159202 | validated |
| tarbase | hsa-miR-18a-5p  | UBE2Z    | 65264  | ENSG00000159202 | validated |
| tarbase | hsa-miR-326     | UBE2Z    | 65264  | ENSG00000159202 | validated |
| tarbase | hsa-miR-582-5p  | UBE2Z    | 65264  | ENSG00000159202 | validated |
| tarbase | hsa-miR-106b-5p | RUNX1    | 861    | ENSG00000159216 | validated |
| tarbase | hsa-miR-212-3p  | RUNX1    | 861    | ENSG00000159216 | validated |
| tarbase | hsa-miR-106b-5p | IGF2BP1  | 10642  | ENSG00000159217 | validated |
| tarbase | hsa-miR-181a-5p | IGF2BP1  | 10642  | ENSG00000159217 | validated |
| tarbase | hsa-miR-21-5p   | IGF2BP1  | 10642  | ENSG00000159217 | validated |
| tarbase | hsa-miR-301a-3p | IGF2BP1  | 10642  | ENSG00000159217 | validated |
| tarbase | hsa-miR-582-3p  | IGF2BP1  | 10642  | ENSG00000159217 | validated |
| tarbase | hsa-miR-181a-5p | MORC3    | 23515  | ENSG00000159256 | validated |
| tarbase | hsa-miR-212-3p  | MORC3    | 23515  | ENSG00000159256 | validated |
| tarbase | hsa-miR-18a-5p  | SIM2     | 6493   | ENSG00000159263 | validated |
| tarbase | hsa-miR-181a-5p | HLCS     | 3141   | ENSG00000159267 | validated |
| tarbase | hsa-miR-106b-5p | ADIPOR1  | 51094  | ENSG00000159346 | validated |
| tarbase | hsa-miR-15b-5p  | ADIPOR1  | 51094  | ENSG00000159346 | validated |
| tarbase | hsa-miR-222-3p  | ADIPOR1  | 51094  | ENSG00000159346 | validated |
| tarbase | hsa-miR-18a-5p  | CYB5R1   | 51706  | ENSG00000159348 | validated |
| tarbase | hsa-miR-106b-5p | PSMB4    | 5692   | ENSG00000159377 | validated |
| tarbase | hsa-miR-18a-5p  | BTG2     | 7832   | ENSG00000159388 | validated |
| tarbase | hsa-miR-212-3p  | BTG2     | 7832   | ENSG00000159388 | validated |
| tarbase | hsa-miR-222-3p  | BTG2     | 7832   | ENSG00000159388 | validated |
| tarbase | hsa-miR-296-5p  | BTG2     | 7832   | ENSG00000159388 | validated |
| tarbase | hsa-miR-326     | BTG2     | 7832   | ENSG00000159388 | validated |
| tarbase | hsa-miR-582-5p  | BTG2     | 7832   | ENSG00000159388 | validated |
| tarbase | hsa-miR-181a-5p | HK2      | 3099   | ENSG00000159399 | validated |
| tarbase | hsa-miR-21-5p   | HK2      | 3099   | ENSG00000159399 | validated |
| tarbase | hsa-miR-106b-5p | UBR1     | 197131 | ENSG00000159459 | validated |
| tarbase | hsa-miR-106b-5p | AMFR     | 267    | ENSG00000159461 | validated |
| tarbase | hsa-miR-21-5p   | AMFR     | 267    | ENSG00000159461 | validated |
| tarbase | hsa-miR-15b-5p  | AMFR     | 267    | ENSG00000159461 | validated |
| tarbase | hsa-miR-181a-5p | MED8     | 112950 | ENSG00000159479 | validated |
| tarbase | hsa-miR-15b-5p  | RGL4     | 266747 | ENSG00000159496 | validated |
| tarbase | hsa-miR-212-3p  | ISL2     | 64843  | ENSG00000159556 | validated |
| tarbase | hsa-miR-181a-5p | RSPRY1   | 89970  | ENSG00000159579 | validated |
| tarbase | hsa-miR-301a-3p | RSPRY1   | 89970  | ENSG00000159579 | validated |
| tarbase | hsa-miR-505-3p  | RSPRY1   | 89970  | ENSG00000159579 | validated |
| tarbase | hsa-miR-106b-5p | GPBP1L1  | 60313  | ENSG00000159592 | validated |
| tarbase | hsa-miR-15b-5p  | GPBP1L1  | 60313  | ENSG00000159592 | validated |
| tarbase | hsa-miR-181a-5p | GPBP1L1  | 60313  | ENSG00000159592 | validated |
| tarbase | hsa-miR-15b-5p  | NAE1     | 8883   | ENSG00000159593 | validated |
| tarbase | hsa-miR-18a-5p  | NAE1     | 8883   | ENSG00000159593 | validated |
| tarbase | hsa-miR-582-5p  | NAE1     | 8883   | ENSG00000159593 | validated |
| tarbase | hsa-miR-301a-3p | EFCAB14  | 9813   | ENSG00000159658 | validated |
| tarbase | hsa-miR-106b-5p | CTBP1    | 1487   | ENSG00000159692 | validated |
| tarbase | hsa-miR-18a-5p  | TPPP3    | 51673  | ENSG00000159713 | validated |
| tarbase | hsa-miR-18a-5p  | ZDHC1    | 29800  | ENSG00000159714 | validated |
| tarbase | hsa-miR-212-3p  | ATP6V0D1 | 9114   | ENSG00000159720 | validated |
| tarbase | hsa-miR-582-3p  | ATP6V0D1 | 9114   | ENSG00000159720 | validated |
| tarbase | hsa-miR-181a-5p | PSKH1    | 5681   | ENSG00000159792 | validated |
| tarbase | hsa-miR-582-3p  | PSKH1    | 5681   | ENSG00000159792 | validated |
| tarbase | hsa-miR-15b-5p  | ZYX      | 7791   | ENSG00000159840 | validated |
| tarbase | hsa-miR-192-5p  | ABR      | 29     | ENSG00000159842 | validated |
| tarbase | hsa-miR-212-3p  | ZNF230   | 7773   | ENSG00000159882 | validated |
| tarbase | hsa-miR-212-3p  | ZNF222   | 7673   | ENSG00000159885 | validated |
| tarbase | hsa-miR-212-3p  | ZNF233   | 353355 | ENSG00000159915 | validated |
| tarbase | hsa-miR-212-3p  | ZNF235   | 9310   | ENSG00000159917 | validated |

|         |                 |            |        |                 |           |
|---------|-----------------|------------|--------|-----------------|-----------|
| tarbase | hsa-miR-18a-5p  | GNE        | 10020  | ENSG00000159921 | validated |
| tarbase | hsa-miR-15b-5p  | ARHGAP35   | 2909   | ENSG00000160007 | validated |
| tarbase | hsa-miR-181a-5p | ARHGAP35   | 2909   | ENSG00000160007 | validated |
| tarbase | hsa-miR-21-5p   | ARHGAP35   | 2909   | ENSG00000160007 | validated |
| tarbase | hsa-miR-181a-5p | CALM3      | 808    | ENSG00000160014 | validated |
| tarbase | hsa-miR-296-5p  | CALM3      | 808    | ENSG00000160014 | validated |
| tarbase | hsa-miR-18a-5p  | DFFA       | 1676   | ENSG00000160049 | validated |
| tarbase | hsa-miR-212-3p  | DFFA       | 1676   | ENSG00000160049 | validated |
| tarbase | hsa-miR-15b-5p  | BSDC1      | 55108  | ENSG00000160058 | validated |
| tarbase | hsa-miR-296-5p  | BSDC1      | 55108  | ENSG00000160058 | validated |
| tarbase | hsa-miR-326     | BSDC1      | 55108  | ENSG00000160058 | validated |
| tarbase | hsa-miR-106b-5p | ZBTB8A     | 653121 | ENSG00000160062 | validated |
| tarbase | hsa-miR-18a-5p  | ZBTB8A     | 653121 | ENSG00000160062 | validated |
| tarbase | hsa-miR-582-3p  | ZBTB8A     | 653121 | ENSG00000160062 | validated |
| tarbase | hsa-miR-222-3p  | UBE2J2     | 118424 | ENSG00000160087 | validated |
| tarbase | hsa-miR-106b-5p | ZNF362     | 149076 | ENSG00000160094 | validated |
| tarbase | hsa-miR-212-3p  | ZNF362     | 149076 | ENSG00000160094 | validated |
| tarbase | hsa-miR-106b-5p | VMA21      | 203547 | ENSG00000160131 | validated |
| tarbase | hsa-miR-144-3p  | VMA21      | 203547 | ENSG00000160131 | validated |
| tarbase | hsa-miR-15b-5p  | VMA21      | 203547 | ENSG00000160131 | validated |
| tarbase | hsa-miR-181a-5p | VMA21      | 203547 | ENSG00000160131 | validated |
| tarbase | hsa-miR-212-3p  | RSPH1      | 89765  | ENSG00000160188 | validated |
| tarbase | hsa-miR-106b-5p | WDR4       | 10785  | ENSG00000160193 | validated |
| tarbase | hsa-miR-181a-5p | WDR4       | 10785  | ENSG00000160193 | validated |
| tarbase | hsa-miR-18a-5p  | NDUFV3     | 4731   | ENSG00000160194 | validated |
| tarbase | hsa-miR-181a-5p | PKNOX1     | 5316   | ENSG00000160199 | validated |
| tarbase | hsa-miR-296-5p  | CBS        | 875    | ENSG00000160200 | validated |
| tarbase | hsa-miR-18a-5p  | U2AF1      | 7307   | ENSG00000160201 | validated |
| tarbase | hsa-miR-181a-5p | RRP1B      | 23076  | ENSG00000160208 | validated |
| tarbase | hsa-miR-192-5p  | RRP1B      | 23076  | ENSG00000160208 | validated |
| tarbase | hsa-miR-301a-3p | G6PD       | 2539   | ENSG00000160211 | validated |
| tarbase | hsa-miR-21-5p   | CSTB       | 1476   | ENSG00000160213 | validated |
| tarbase | hsa-miR-106b-5p | AGPAT3     | 56894  | ENSG00000160216 | validated |
| tarbase | hsa-miR-15b-5p  | AGPAT3     | 56894  | ENSG00000160216 | validated |
| tarbase | hsa-miR-181a-5p | AGPAT3     | 56894  | ENSG00000160216 | validated |
| tarbase | hsa-miR-18a-5p  | AGPAT3     | 56894  | ENSG00000160216 | validated |
| tarbase | hsa-miR-18a-5p  | TRAPPC10   | 7109   | ENSG00000160218 | validated |
| tarbase | hsa-miR-21-5p   | TRAPPC10   | 7109   | ENSG00000160218 | validated |
| tarbase | hsa-miR-181a-5p | ZNF66      | 7617   | ENSG00000160229 | validated |
| tarbase | hsa-miR-15b-5p  | FTCD       | 10841  | ENSG00000160282 | validated |
| tarbase | hsa-miR-181a-5p | LSS        | 4047   | ENSG00000160285 | validated |
| tarbase | hsa-miR-21-5p   | LSS        | 4047   | ENSG00000160285 | validated |
| tarbase | hsa-miR-181a-5p | MCM3AP     | 8888   | ENSG00000160294 | validated |
| tarbase | hsa-miR-296-5p  | C21orf58   | 54058  | ENSG00000160298 | validated |
| tarbase | hsa-miR-326     | DIP2A      | 23181  | ENSG00000160305 | validated |
| tarbase | hsa-miR-505-3p  | DIP2A      | 23181  | ENSG00000160305 | validated |
| tarbase | hsa-miR-212-3p  | CLDND2     | 125875 | ENSG00000160318 | validated |
| tarbase | hsa-miR-106b-5p | ZNF714     | 148206 | ENSG00000160352 | validated |
| tarbase | hsa-miR-18a-5p  | ZNF714     | 148206 | ENSG00000160352 | validated |
| tarbase | hsa-miR-18a-5p  | GPSM1      | 26086  | ENSG00000160360 | validated |
| tarbase | hsa-miR-192-5p  | GPSM1      | 26086  | ENSG00000160360 | validated |
| tarbase | hsa-miR-296-5p  | GPSM1      | 26086  | ENSG00000160360 | validated |
| tarbase | hsa-miR-326     | GPSM1      | 26086  | ENSG00000160360 | validated |
| tarbase | hsa-miR-181a-5p | ST6GALNAC6 | 30815  | ENSG00000160408 | validated |
| tarbase | hsa-miR-15b-5p  | ZER1       | 10444  | ENSG00000160445 | validated |
| tarbase | hsa-miR-15b-5p  | ZDHHC12    | 84885  | ENSG00000160446 | validated |
| tarbase | hsa-miR-181a-5p | ZDHHC12    | 84885  | ENSG00000160446 | validated |
| tarbase | hsa-miR-296-5p  | PKN3       | 29941  | ENSG00000160447 | validated |
| tarbase | hsa-miR-212-3p  | PLPP7      | 84814  | ENSG00000160539 | validated |
| tarbase | hsa-miR-106b-5p | TAOK1      | 57551  | ENSG00000160551 | validated |
| tarbase | hsa-miR-181a-5p | TAOK1      | 57551  | ENSG00000160551 | validated |
| tarbase | hsa-miR-212-3p  | TAOK1      | 57551  | ENSG00000160551 | validated |
| tarbase | hsa-miR-21-5p   | TAOK1      | 57551  | ENSG00000160551 | validated |
| tarbase | hsa-miR-222-3p  | TAOK1      | 57551  | ENSG00000160551 | validated |
| tarbase | hsa-miR-296-5p  | TAOK1      | 57551  | ENSG00000160551 | validated |
| tarbase | hsa-miR-326     | TAOK1      | 57551  | ENSG00000160551 | validated |
| tarbase | hsa-miR-15b-5p  | SIK3       | 23387  | ENSG00000160584 | validated |
| tarbase | hsa-miR-181a-5p | SIK3       | 23387  | ENSG00000160584 | validated |
| tarbase | hsa-miR-326     | SIK3       | 23387  | ENSG00000160584 | validated |
| tarbase | hsa-miR-15b-5p  | MPZL3      | 196264 | ENSG00000160588 | validated |
| tarbase | hsa-miR-301a-3p | CHTOP      | 26097  | ENSG00000160679 | validated |



|         |                 |          |        |                 |           |
|---------|-----------------|----------|--------|-----------------|-----------|
| tarbase | hsa-miR-106b-5p | FLAD1    | 80308  | ENSG00000160688 | validated |
| tarbase | hsa-miR-21-5p   | FLAD1    | 80308  | ENSG00000160688 | validated |
| tarbase | hsa-miR-18a-5p  | FLAD1    | 80308  | ENSG00000160688 | validated |
| tarbase | hsa-miR-15b-5p  | NLRX1    | 79671  | ENSG00000160703 | validated |
| tarbase | hsa-miR-301a-3p | ADAR     | 103    | ENSG00000160710 | validated |
| tarbase | hsa-miR-582-5p  | ADAR     | 103    | ENSG00000160710 | validated |
| tarbase | hsa-miR-212-3p  | ADAR     | 103    | ENSG00000160710 | validated |
| tarbase | hsa-miR-212-3p  | IL6R     | 3570   | ENSG00000160712 | validated |
| tarbase | hsa-miR-181a-5p | UBE2Q1   | 55585  | ENSG00000160714 | validated |
| tarbase | hsa-miR-21-5p   | UBE2Q1   | 55585  | ENSG00000160714 | validated |
| tarbase | hsa-miR-106b-5p | CRTC2    | 200186 | ENSG00000160741 | validated |
| tarbase | hsa-miR-192-5p  | CRTC2    | 200186 | ENSG00000160741 | validated |
| tarbase | hsa-miR-301a-3p | CRTC2    | 200186 | ENSG00000160741 | validated |
| tarbase | hsa-miR-106b-5p | RUSC1    | 23623  | ENSG00000160753 | validated |
| tarbase | hsa-miR-15b-5p  | RUSC1    | 23623  | ENSG00000160753 | validated |
| tarbase | hsa-miR-15b-5p  | FAM189B  | 10712  | ENSG00000160767 | validated |
| tarbase | hsa-miR-296-5p  | FAM189B  | 10712  | ENSG00000160767 | validated |
| tarbase | hsa-miR-15b-5p  | PAQR6    | 79957  | ENSG00000160781 | validated |
| tarbase | hsa-miR-301a-3p | SLC25A44 | 9673   | ENSG00000160785 | validated |
| tarbase | hsa-miR-18a-5p  | LMNA     | 4000   | ENSG00000160789 | validated |
| tarbase | hsa-miR-296-5p  | LMNA     | 4000   | ENSG00000160789 | validated |
| tarbase | hsa-miR-301a-3p | LMNA     | 4000   | ENSG00000160789 | validated |
| tarbase | hsa-miR-106b-5p | NACC1    | 112939 | ENSG00000160877 | validated |
| tarbase | hsa-miR-181a-5p | NACC1    | 112939 | ENSG00000160877 | validated |
| tarbase | hsa-miR-296-5p  | NACC1    | 112939 | ENSG00000160877 | validated |
| tarbase | hsa-miR-106b-5p | ZNF394   | 84124  | ENSG00000160908 | validated |
| tarbase | hsa-miR-212-3p  | CPSF4    | 10898  | ENSG00000160917 | validated |
| tarbase | hsa-miR-15b-5p  | LY6E     | 4061   | ENSG00000160932 | validated |
| tarbase | hsa-miR-212-3p  | LY6E     | 4061   | ENSG00000160932 | validated |
| tarbase | hsa-miR-301a-3p | PWWP3A   | 84939  | ENSG00000160953 | validated |
| tarbase | hsa-miR-212-3p  | LRRC14   | 9684   | ENSG00000160959 | validated |
| tarbase | hsa-miR-301a-3p | PPP1R16A | 84988  | ENSG00000160972 | validated |
| tarbase | hsa-miR-18a-5p  | ALKBH4   | 54784  | ENSG00000160993 | validated |
| tarbase | hsa-miR-15b-5p  | SQSTM1   | 8878   | ENSG00000161011 | validated |
| tarbase | hsa-miR-222-3p  | SQSTM1   | 8878   | ENSG00000161011 | validated |
| tarbase | hsa-miR-15b-5p  | MGAT4B   | 11282  | ENSG00000161013 | validated |
| tarbase | hsa-miR-18a-5p  | MGAT4B   | 11282  | ENSG00000161013 | validated |
| tarbase | hsa-miR-301a-3p | MGAT4B   | 11282  | ENSG00000161013 | validated |
| tarbase | hsa-miR-212-3p  | MAML1    | 9794   | ENSG00000161021 | validated |
| tarbase | hsa-miR-222-3p  | MAML1    | 9794   | ENSG00000161021 | validated |
| tarbase | hsa-miR-301a-3p | MAML1    | 9794   | ENSG00000161021 | validated |
| tarbase | hsa-miR-106b-5p | NAPEPLD  | 222236 | ENSG00000161048 | validated |
| tarbase | hsa-miR-222-3p  | NAPEPLD  | 222236 | ENSG00000161048 | validated |
| tarbase | hsa-miR-15b-5p  | PSMC2    | 5701   | ENSG00000161057 | validated |
| tarbase | hsa-miR-18a-5p  | PSMC2    | 5701   | ENSG00000161057 | validated |
| tarbase | hsa-miR-582-5p  | PSMC2    | 5701   | ENSG00000161057 | validated |
| tarbase | hsa-miR-106b-5p | DVL3     | 1857   | ENSG00000161202 | validated |
| tarbase | hsa-miR-15b-5p  | DVL3     | 1857   | ENSG00000161202 | validated |
| tarbase | hsa-miR-15b-5p  | ABCF3    | 55324  | ENSG00000161204 | validated |
| tarbase | hsa-miR-106b-5p | PCYT1A   | 5130   | ENSG00000161217 | validated |
| tarbase | hsa-miR-212-3p  | U2AF1L4  | 199746 | ENSG00000161265 | validated |
| tarbase | hsa-miR-212-3p  | ZNF382   | 84911  | ENSG00000161298 | validated |
| tarbase | hsa-miR-181a-5p | SRSF2    | 6427   | ENSG00000161547 | validated |
| tarbase | hsa-miR-21-5p   | SRSF2    | 6427   | ENSG00000161547 | validated |
| tarbase | hsa-miR-15b-5p  | SRSF2    | 6427   | ENSG00000161547 | validated |
| tarbase | hsa-miR-296-5p  | ALDH16A1 | 126133 | ENSG00000161618 | validated |
| tarbase | hsa-miR-326     | ITGA5    | 3678   | ENSG00000161638 | validated |
| tarbase | hsa-miR-18a-5p  | EMC10    | 284361 | ENSG00000161671 | validated |
| tarbase | hsa-miR-326     | EMC10    | 284361 | ENSG00000161671 | validated |
| tarbase | hsa-miR-582-3p  | EMC10    | 284361 | ENSG00000161671 | validated |
| tarbase | hsa-miR-15b-5p  | JOSD2    | 126119 | ENSG00000161677 | validated |
| tarbase | hsa-miR-15b-5p  | LARP4    | 113251 | ENSG00000161813 | validated |
| tarbase | hsa-miR-181a-5p | LARP4    | 113251 | ENSG00000161813 | validated |
| tarbase | hsa-miR-21-5p   | LARP4    | 113251 | ENSG00000161813 | validated |
| tarbase | hsa-miR-301a-3p | LARP4    | 113251 | ENSG00000161813 | validated |
| tarbase | hsa-miR-301a-3p | RAVER1   | 125950 | ENSG00000161847 | validated |
| tarbase | hsa-miR-21-5p   | SPC24    | 147841 | ENSG00000161888 | validated |
| tarbase | hsa-miR-181a-5p | SEN3P3   | 26168  | ENSG00000161956 | validated |
| tarbase | hsa-miR-15b-5p  | POLR3K   | 51728  | ENSG00000161980 | validated |
| tarbase | hsa-miR-505-3p  | POLR3K   | 51728  | ENSG00000161980 | validated |
| tarbase | hsa-miR-106b-5p | CCNF     | 899    | ENSG00000162063 | validated |

|         |                 |          |        |                 |           |
|---------|-----------------|----------|--------|-----------------|-----------|
| tarbase | hsa-miR-106b-5p | TBC1D24  | 57465  | ENSG00000162065 | validated |
| tarbase | hsa-miR-296-5p  | AMDHD2   | 51005  | ENSG00000162066 | validated |
| tarbase | hsa-miR-301a-3p | PAQR4    | 124222 | ENSG00000162073 | validated |
| tarbase | hsa-miR-212-3p  | ZG16B    | 124220 | ENSG00000162078 | validated |
| tarbase | hsa-miR-106b-5p | SHANK2   | 22941  | ENSG00000162105 | validated |
| tarbase | hsa-miR-144-3p  | SHANK2   | 22941  | ENSG00000162105 | validated |
| tarbase | hsa-miR-15b-5p  | SHANK2   | 22941  | ENSG00000162105 | validated |
| tarbase | hsa-miR-18a-5p  | SHANK2   | 22941  | ENSG00000162105 | validated |
| tarbase | hsa-miR-301a-3p | SHANK2   | 22941  | ENSG00000162105 | validated |
| tarbase | hsa-miR-222-3p  | TAF6L    | 10629  | ENSG00000162227 | validated |
| tarbase | hsa-miR-212-3p  | SYVN1    | 84447  | ENSG00000162298 | validated |
| tarbase | hsa-miR-582-3p  | SYVN1    | 84447  | ENSG00000162298 | validated |
| tarbase | hsa-miR-106b-5p | RPS6KA4  | 8986   | ENSG00000162302 | validated |
| tarbase | hsa-miR-296-5p  | LRP5     | 4041   | ENSG00000162337 | validated |
| tarbase | hsa-miR-21-5p   | TPCN2    | 219931 | ENSG00000162341 | validated |
| tarbase | hsa-miR-181a-5p | ELAVL4   | 1996   | ENSG00000162374 | validated |
| tarbase | hsa-miR-106b-5p | ZYG11B   | 79699  | ENSG00000162378 | validated |
| tarbase | hsa-miR-181a-5p | ZYG11B   | 79699  | ENSG00000162378 | validated |
| tarbase | hsa-miR-212-3p  | ZYG11B   | 79699  | ENSG00000162378 | validated |
| tarbase | hsa-miR-296-5p  | PARS2    | 25973  | ENSG00000162396 | validated |
| tarbase | hsa-miR-181a-5p | USP24    | 23358  | ENSG00000162402 | validated |
| tarbase | hsa-miR-301a-3p | USP24    | 23358  | ENSG00000162402 | validated |
| tarbase | hsa-miR-582-5p  | USP24    | 23358  | ENSG00000162402 | validated |
| tarbase | hsa-miR-21-5p   | PLPP3    | 8613   | ENSG00000162407 | validated |
| tarbase | hsa-miR-505-3p  | PLPP3    | 8613   | ENSG00000162407 | validated |
| tarbase | hsa-miR-18a-5p  | NOL9     | 79707  | ENSG00000162408 | validated |
| tarbase | hsa-miR-21-5p   | PRKAA2   | 5563   | ENSG00000162409 | validated |
| tarbase | hsa-miR-222-3p  | PRKAA2   | 5563   | ENSG00000162409 | validated |
| tarbase | hsa-miR-296-5p  | PRKAA2   | 5563   | ENSG00000162409 | validated |
| tarbase | hsa-miR-181a-5p | PRKAA2   | 5563   | ENSG00000162409 | validated |
| tarbase | hsa-miR-582-3p  | KLHL21   | 9903   | ENSG00000162413 | validated |
| tarbase | hsa-miR-18a-5p  | ZSWIM5   | 57643  | ENSG00000162415 | validated |
| tarbase | hsa-miR-212-3p  | ZSWIM5   | 57643  | ENSG00000162415 | validated |
| tarbase | hsa-miR-296-5p  | SELENON  | 57190  | ENSG00000162430 | validated |
| tarbase | hsa-miR-212-3p  | SELENON  | 57190  | ENSG00000162430 | validated |
| tarbase | hsa-miR-212-3p  | AK4      | 205    | ENSG00000162433 | validated |
| tarbase | hsa-miR-21-5p   | RAVER2   | 55225  | ENSG00000162437 | validated |
| tarbase | hsa-miR-106b-5p | DHRS3    | 9249   | ENSG00000162496 | validated |
| tarbase | hsa-miR-15b-5p  | SDC3     | 9672   | ENSG00000162512 | validated |
| tarbase | hsa-miR-296-5p  | PEF1     | 553115 | ENSG00000162517 | validated |
| tarbase | hsa-miR-106b-5p | KIAA1522 | 57648  | ENSG00000162522 | validated |
| tarbase | hsa-miR-15b-5p  | KIAA1522 | 57648  | ENSG00000162522 | validated |
| tarbase | hsa-miR-582-3p  | KIAA1522 | 57648  | ENSG00000162522 | validated |
| tarbase | hsa-miR-106b-5p | CAMK2N1  | 55450  | ENSG00000162545 | validated |
| tarbase | hsa-miR-181a-5p | CAMK2N1  | 55450  | ENSG00000162545 | validated |
| tarbase | hsa-miR-18a-5p  | CAMK2N1  | 55450  | ENSG00000162545 | validated |
| tarbase | hsa-miR-212-3p  | CAMK2N1  | 55450  | ENSG00000162545 | validated |
| tarbase | hsa-miR-106b-5p | NFIA     | 4774   | ENSG00000162599 | validated |
| tarbase | hsa-miR-181a-5p | NFIA     | 4774   | ENSG00000162599 | validated |
| tarbase | hsa-miR-301a-3p | NFIA     | 4774   | ENSG00000162599 | validated |
| tarbase | hsa-miR-212-3p  | NFIA     | 4774   | ENSG00000162599 | validated |
| tarbase | hsa-miR-15b-5p  | OMA1     | 115209 | ENSG00000162600 | validated |
| tarbase | hsa-miR-15b-5p  | MYSM1    | 114803 | ENSG00000162601 | validated |
| tarbase | hsa-miR-181a-5p | MYSM1    | 114803 | ENSG00000162601 | validated |
| tarbase | hsa-miR-181a-5p | USP1     | 7398   | ENSG00000162607 | validated |
| tarbase | hsa-miR-21-5p   | USP1     | 7398   | ENSG00000162607 | validated |
| tarbase | hsa-miR-301a-3p | USP1     | 7398   | ENSG00000162607 | validated |
| tarbase | hsa-miR-18a-5p  | FUBP1    | 8880   | ENSG00000162613 | validated |
| tarbase | hsa-miR-106b-5p | FUBP1    | 8880   | ENSG00000162613 | validated |
| tarbase | hsa-miR-15b-5p  | DNAJB4   | 11080  | ENSG00000162616 | validated |
| tarbase | hsa-miR-192-5p  | TYW3     | 127253 | ENSG00000162623 | validated |
| tarbase | hsa-miR-212-3p  | LHX8     | 431707 | ENSG00000162624 | validated |
| tarbase | hsa-miR-301a-3p | NTNG1    | 22854  | ENSG00000162631 | validated |
| tarbase | hsa-miR-21-5p   | FAM102B  | 284611 | ENSG00000162636 | validated |
| tarbase | hsa-miR-181a-5p | C1orf52  | 148423 | ENSG00000162642 | validated |
| tarbase | hsa-miR-212-3p  | WDR63    | 126820 | ENSG00000162643 | validated |
| tarbase | hsa-miR-582-5p  | GBP4     | 115361 | ENSG00000162654 | validated |
| tarbase | hsa-miR-106b-5p | ZNF326   | 284695 | ENSG00000162664 | validated |
| tarbase | hsa-miR-15b-5p  | ZNF326   | 284695 | ENSG00000162664 | validated |
| tarbase | hsa-miR-181a-5p | ZNF326   | 284695 | ENSG00000162664 | validated |
| tarbase | hsa-miR-212-3p  | BRINP3   | 339479 | ENSG00000162670 | validated |

|         |                 |          |        |                 |           |
|---------|-----------------|----------|--------|-----------------|-----------|
| tarbase | hsa-miR-106b-5p | AGL      | 178    | ENSG00000162688 | validated |
| tarbase | hsa-miR-212-3p  | EXTL2    | 2135   | ENSG00000162694 | validated |
| tarbase | hsa-miR-582-3p  | EXTL2    | 2135   | ENSG00000162694 | validated |
| tarbase | hsa-miR-106b-5p | EXTL2    | 2135   | ENSG00000162694 | validated |
| tarbase | hsa-miR-15b-5p  | SLC30A7  | 148867 | ENSG00000162695 | validated |
| tarbase | hsa-miR-18a-5p  | SLC30A7  | 148867 | ENSG00000162695 | validated |
| tarbase | hsa-miR-582-5p  | SLC30A7  | 148867 | ENSG00000162695 | validated |
| tarbase | hsa-miR-15b-5p  | ZNF281   | 23528  | ENSG00000162702 | validated |
| tarbase | hsa-miR-181a-5p | ZNF281   | 23528  | ENSG00000162702 | validated |
| tarbase | hsa-miR-18a-5p  | ZNF281   | 23528  | ENSG00000162702 | validated |
| tarbase | hsa-miR-21-5p   | ZNF281   | 23528  | ENSG00000162702 | validated |
| tarbase | hsa-miR-582-5p  | ZNF281   | 23528  | ENSG00000162702 | validated |
| tarbase | hsa-miR-212-3p  | IGSF8    | 93185  | ENSG00000162729 | validated |
| tarbase | hsa-miR-18a-5p  | DDR2     | 4921   | ENSG00000162733 | validated |
| tarbase | hsa-miR-21-5p   | PEA15    | 8682   | ENSG00000162734 | validated |
| tarbase | hsa-miR-15b-5p  | PEX19    | 5824   | ENSG00000162735 | validated |
| tarbase | hsa-miR-222-3p  | SLAMF6   | 114836 | ENSG00000162739 | validated |
| tarbase | hsa-miR-296-5p  | SLAMF6   | 114836 | ENSG00000162739 | validated |
| tarbase | hsa-miR-212-3p  | FCRLB    | 127943 | ENSG00000162746 | validated |
| tarbase | hsa-miR-106b-5p | KLHDC9   | 126823 | ENSG00000162755 | validated |
| tarbase | hsa-miR-181a-5p | RBM15    | 64783  | ENSG00000162775 | validated |
| tarbase | hsa-miR-18a-5p  | IER5     | 51278  | ENSG00000162783 | validated |
| tarbase | hsa-miR-15b-5p  | BPNT1    | 10380  | ENSG00000162813 | validated |
| tarbase | hsa-miR-212-3p  | SPATA17  | 128153 | ENSG00000162814 | validated |
| tarbase | hsa-miR-18a-5p  | BROX     | 148362 | ENSG00000162819 | validated |
| tarbase | hsa-miR-301a-3p | BROX     | 148362 | ENSG00000162819 | validated |
| tarbase | hsa-miR-106b-5p | CNST     | 163882 | ENSG00000162852 | validated |
| tarbase | hsa-miR-15b-5p  | CNST     | 163882 | ENSG00000162852 | validated |
| tarbase | hsa-miR-181a-5p | CNST     | 163882 | ENSG00000162852 | validated |
| tarbase | hsa-miR-15b-5p  | PPP1R21  | 129285 | ENSG00000162869 | validated |
| tarbase | hsa-miR-212-3p  | CAPN2    | 824    | ENSG00000162909 | validated |
| tarbase | hsa-miR-21-5p   | CAPN2    | 824    | ENSG00000162909 | validated |
| tarbase | hsa-miR-106b-5p | WDR26    | 80232  | ENSG00000162923 | validated |
| tarbase | hsa-miR-15b-5p  | WDR26    | 80232  | ENSG00000162923 | validated |
| tarbase | hsa-miR-181a-5p | WDR26    | 80232  | ENSG00000162923 | validated |
| tarbase | hsa-miR-18a-5p  | WDR26    | 80232  | ENSG00000162923 | validated |
| tarbase | hsa-miR-212-3p  | WDR26    | 80232  | ENSG00000162923 | validated |
| tarbase | hsa-miR-21-5p   | REL      | 5966   | ENSG00000162924 | validated |
| tarbase | hsa-miR-106b-5p | PEX13    | 5194   | ENSG00000162928 | validated |
| tarbase | hsa-miR-505-3p  | KIAA1841 | 84542  | ENSG00000162929 | validated |
| tarbase | hsa-miR-181a-5p | DPY30    | 84661  | ENSG00000162961 | validated |
| tarbase | hsa-miR-106b-5p | TYW5     | 129450 | ENSG00000162971 | validated |
| tarbase | hsa-miR-15b-5p  | MAIP1    | 79568  | ENSG00000162972 | validated |
| tarbase | hsa-miR-301a-3p | SLC66A3  | 130814 | ENSG00000162976 | validated |
| tarbase | hsa-miR-181a-5p | ARL5A    | 26225  | ENSG00000162980 | validated |
| tarbase | hsa-miR-212-3p  | CLHC1    | 130162 | ENSG00000162994 | validated |
| tarbase | hsa-miR-18a-5p  | CFAP36   | 112942 | ENSG00000163001 | validated |
| tarbase | hsa-miR-15b-5p  | FBXO41   | 150726 | ENSG00000163013 | validated |
| tarbase | hsa-miR-18a-5p  | SMC6     | 79677  | ENSG00000163029 | validated |
| tarbase | hsa-miR-212-3p  | VSNL1    | 7447   | ENSG00000163032 | validated |
| tarbase | hsa-miR-181a-5p | COQ8A    | 56997  | ENSG00000163050 | validated |
| tarbase | hsa-miR-106b-5p | SLC16A14 | 151473 | ENSG00000163053 | validated |
| tarbase | hsa-miR-15b-5p  | SLC16A14 | 151473 | ENSG00000163053 | validated |
| tarbase | hsa-miR-212-3p  | SPATA18  | 132671 | ENSG00000163071 | validated |
| tarbase | hsa-miR-15b-5p  | SGPP2    | 130367 | ENSG00000163082 | validated |
| tarbase | hsa-miR-212-3p  | INHBB    | 3625   | ENSG00000163083 | validated |
| tarbase | hsa-miR-301a-3p | INHBB    | 3625   | ENSG00000163083 | validated |
| tarbase | hsa-miR-106b-5p | PDLIM5   | 10611  | ENSG00000163110 | validated |
| tarbase | hsa-miR-18a-5p  | PDLIM5   | 10611  | ENSG00000163110 | validated |
| tarbase | hsa-miR-181a-5p | PDLIM5   | 10611  | ENSG00000163110 | validated |
| tarbase | hsa-miR-212-3p  | NEURL3   | 93082  | ENSG00000163121 | validated |
| tarbase | hsa-miR-222-3p  | RPRD2    | 23248  | ENSG00000163125 | validated |
| tarbase | hsa-miR-15b-5p  | ANKRD23  | 200539 | ENSG00000163126 | validated |
| tarbase | hsa-miR-505-3p  | PACRGL   | 133015 | ENSG00000163138 | validated |
| tarbase | hsa-miR-222-3p  | LYSMD1   | 388695 | ENSG00000163155 | validated |
| tarbase | hsa-miR-505-3p  | LYSMD1   | 388695 | ENSG00000163155 | validated |
| tarbase | hsa-miR-582-3p  | LYSMD1   | 388695 | ENSG00000163155 | validated |
| tarbase | hsa-miR-212-3p  | LYSMD1   | 388695 | ENSG00000163155 | validated |
| tarbase | hsa-miR-106b-5p | VPS72    | 6944   | ENSG00000163159 | validated |
| tarbase | hsa-miR-15b-5p  | VPS72    | 6944   | ENSG00000163159 | validated |
| tarbase | hsa-miR-106b-5p | RNF149   | 284996 | ENSG00000163162 | validated |

|         |                 |          |        |                 |           |
|---------|-----------------|----------|--------|-----------------|-----------|
| tarbase | hsa-miR-21-5p   | RNF149   | 284996 | ENSG00000163162 | validated |
| tarbase | hsa-miR-582-5p  | RNF149   | 284996 | ENSG00000163162 | validated |
| tarbase | hsa-miR-181a-5p | IWS1     | 55677  | ENSG00000163166 | validated |
| tarbase | hsa-miR-212-3p  | IVL      | 3713   | ENSG00000163207 | validated |
| tarbase | hsa-miR-212-3p  | CCNYL1   | 151195 | ENSG00000163249 | validated |
| tarbase | hsa-miR-192-5p  | FZD5     | 7855   | ENSG00000163251 | validated |
| tarbase | hsa-miR-106b-5p | FZD5     | 7855   | ENSG00000163251 | validated |
| tarbase | hsa-miR-181a-5p | DCAF16   | 54876  | ENSG00000163257 | validated |
| tarbase | hsa-miR-505-3p  | DCAF16   | 54876  | ENSG00000163257 | validated |
| tarbase | hsa-miR-15b-5p  | NPPC     | 4880   | ENSG00000163273 | validated |
| tarbase | hsa-miR-301a-3p | NPPC     | 4880   | ENSG00000163273 | validated |
| tarbase | hsa-miR-21-5p   | ALPP     | 250    | ENSG00000163283 | validated |
| tarbase | hsa-miR-21-5p   | PAQR3    | 152559 | ENSG00000163291 | validated |
| tarbase | hsa-miR-582-3p  | PAQR3    | 152559 | ENSG00000163291 | validated |
| tarbase | hsa-miR-15b-5p  | PAQR3    | 152559 | ENSG00000163291 | validated |
| tarbase | hsa-miR-181a-5p | PAQR3    | 152559 | ENSG00000163291 | validated |
| tarbase | hsa-miR-106b-5p | NIPAL1   | 152519 | ENSG00000163293 | validated |
| tarbase | hsa-miR-21-5p   | NIPAL1   | 152519 | ENSG00000163293 | validated |
| tarbase | hsa-miR-192-5p  | ALPI     | 248    | ENSG00000163295 | validated |
| tarbase | hsa-miR-106b-5p | ANTXR2   | 118429 | ENSG00000163297 | validated |
| tarbase | hsa-miR-582-5p  | MRPS18C  | 51023  | ENSG00000163319 | validated |
| tarbase | hsa-miR-15b-5p  | CGGBP1   | 8545   | ENSG00000163320 | validated |
| tarbase | hsa-miR-212-3p  | CGGBP1   | 8545   | ENSG00000163320 | validated |
| tarbase | hsa-miR-582-5p  | CGGBP1   | 8545   | ENSG00000163320 | validated |
| tarbase | hsa-miR-106b-5p | ABRAXAS1 | 84142  | ENSG00000163322 | validated |
| tarbase | hsa-miR-582-5p  | ABRAXAS1 | 84142  | ENSG00000163322 | validated |
| tarbase | hsa-miR-212-3p  | ABRAXAS1 | 84142  | ENSG00000163322 | validated |
| tarbase | hsa-miR-21-5p   | GPR155   | 151556 | ENSG00000163328 | validated |
| tarbase | hsa-miR-15b-5p  | GPR155   | 151556 | ENSG00000163328 | validated |
| tarbase | hsa-miR-106b-5p | PBXIP1   | 57326  | ENSG00000163346 | validated |
| tarbase | hsa-miR-15b-5p  | PBXIP1   | 57326  | ENSG00000163346 | validated |
| tarbase | hsa-miR-296-5p  | PYGO2    | 90780  | ENSG00000163348 | validated |
| tarbase | hsa-miR-106b-5p | HIPK1    | 204851 | ENSG00000163349 | validated |
| tarbase | hsa-miR-15b-5p  | HIPK1    | 204851 | ENSG00000163349 | validated |
| tarbase | hsa-miR-181a-5p | HIPK1    | 204851 | ENSG00000163349 | validated |
| tarbase | hsa-miR-222-3p  | HIPK1    | 204851 | ENSG00000163349 | validated |
| tarbase | hsa-miR-505-3p  | HIPK1    | 204851 | ENSG00000163349 | validated |
| tarbase | hsa-miR-21-5p   | COL6A3   | 1293   | ENSG00000163359 | validated |
| tarbase | hsa-miR-301a-3p | COL6A3   | 1293   | ENSG00000163359 | validated |
| tarbase | hsa-miR-212-3p  | YY1AP1   | 55249  | ENSG00000163374 | validated |
| tarbase | hsa-miR-106b-5p | KBTBD8   | 84541  | ENSG00000163376 | validated |
| tarbase | hsa-miR-212-3p  | KBTBD8   | 84541  | ENSG00000163376 | validated |
| tarbase | hsa-miR-301a-3p | KBTBD8   | 84541  | ENSG00000163376 | validated |
| tarbase | hsa-miR-106b-5p | EOGT     | 285203 | ENSG00000163378 | validated |
| tarbase | hsa-miR-326     | EOGT     | 285203 | ENSG00000163378 | validated |
| tarbase | hsa-miR-181a-5p | SLC22A15 | 55356  | ENSG00000163393 | validated |
| tarbase | hsa-miR-192-5p  | IGFN1    | 91156  | ENSG00000163395 | validated |
| tarbase | hsa-miR-192-5p  | ATP1A1   | 476    | ENSG00000163399 | validated |
| tarbase | hsa-miR-301a-3p | ATP1A1   | 476    | ENSG00000163399 | validated |
| tarbase | hsa-miR-15b-5p  | LRRC58   | 116064 | ENSG00000163428 | validated |
| tarbase | hsa-miR-181a-5p | LRRC58   | 116064 | ENSG00000163428 | validated |
| tarbase | hsa-miR-582-5p  | LRRC58   | 116064 | ENSG00000163428 | validated |
| tarbase | hsa-miR-106b-5p | FSTL1    | 11167  | ENSG00000163430 | validated |
| tarbase | hsa-miR-15b-5p  | FSTL1    | 11167  | ENSG00000163430 | validated |
| tarbase | hsa-miR-181a-5p | FSTL1    | 11167  | ENSG00000163430 | validated |
| tarbase | hsa-miR-21-5p   | FSTL1    | 11167  | ENSG00000163430 | validated |
| tarbase | hsa-miR-326     | FSTL1    | 11167  | ENSG00000163430 | validated |
| tarbase | hsa-miR-582-5p  | FSTL1    | 11167  | ENSG00000163430 | validated |
| tarbase | hsa-miR-582-5p  | ELF3     | 1999   | ENSG00000163435 | validated |
| tarbase | hsa-miR-15b-5p  | TMEM183A | 92703  | ENSG00000163444 | validated |
| tarbase | hsa-miR-212-3p  | TMEM169  | 92691  | ENSG00000163449 | validated |
| tarbase | hsa-miR-181a-5p | IGFBP7   | 3490   | ENSG00000163453 | validated |
| tarbase | hsa-miR-326     | ARPC2    | 10109  | ENSG00000163466 | validated |
| tarbase | hsa-miR-181a-5p | CCT3     | 7203   | ENSG00000163468 | validated |
| tarbase | hsa-miR-296-5p  | SSR2     | 6746   | ENSG00000163479 | validated |
| tarbase | hsa-miR-212-3p  | IHH      | 3549   | ENSG00000163501 | validated |
| tarbase | hsa-miR-212-3p  | CIP2A    | 57650  | ENSG00000163507 | validated |
| tarbase | hsa-miR-181a-5p | TGFBR2   | 7048   | ENSG00000163513 | validated |
| tarbase | hsa-miR-192-5p  | HDAC11   | 79885  | ENSG00000163517 | validated |
| tarbase | hsa-miR-106b-5p | STT3B    | 201595 | ENSG00000163527 | validated |
| tarbase | hsa-miR-181a-5p | STT3B    | 201595 | ENSG00000163527 | validated |

|         |                 |          |        |                 |           |
|---------|-----------------|----------|--------|-----------------|-----------|
| tarbase | hsa-miR-301a-3p | STT3B    | 201595 | ENSG00000163527 | validated |
| tarbase | hsa-miR-212-3p  | SGO2     | 151246 | ENSG00000163535 | validated |
| tarbase | hsa-miR-15b-5p  | CLASP2   | 23122  | ENSG00000163539 | validated |
| tarbase | hsa-miR-181a-5p | CLASP2   | 23122  | ENSG00000163539 | validated |
| tarbase | hsa-miR-15b-5p  | SUCLG1   | 8802   | ENSG00000163541 | validated |
| tarbase | hsa-miR-181a-5p | NUAK2    | 81788  | ENSG00000163545 | validated |
| tarbase | hsa-miR-181a-5p | MNDA     | 4332   | ENSG00000163563 | validated |
| tarbase | hsa-miR-212-3p  | IFI16    | 3428   | ENSG00000163565 | validated |
| tarbase | hsa-miR-222-3p  | EIF5A2   | 56648  | ENSG00000163577 | validated |
| tarbase | hsa-miR-106b-5p | RYBP     | 23429  | ENSG00000163602 | validated |
| tarbase | hsa-miR-192-5p  | RYBP     | 23429  | ENSG00000163602 | validated |
| tarbase | hsa-miR-212-3p  | RYBP     | 23429  | ENSG00000163602 | validated |
| tarbase | hsa-miR-21-5p   | RYBP     | 23429  | ENSG00000163602 | validated |
| tarbase | hsa-miR-106b-5p | PPP4R2   | 151987 | ENSG00000163605 | validated |
| tarbase | hsa-miR-15b-5p  | PPP4R2   | 151987 | ENSG00000163605 | validated |
| tarbase | hsa-miR-181a-5p | PPP4R2   | 151987 | ENSG00000163605 | validated |
| tarbase | hsa-miR-222-3p  | PPP4R2   | 151987 | ENSG00000163605 | validated |
| tarbase | hsa-miR-106b-5p | CD200R1  | 131450 | ENSG00000163606 | validated |
| tarbase | hsa-miR-181a-5p | CD200R1  | 131450 | ENSG00000163606 | validated |
| tarbase | hsa-miR-582-5p  | CD200R1  | 131450 | ENSG00000163606 | validated |
| tarbase | hsa-miR-15b-5p  | CDS1     | 1040   | ENSG00000163624 | validated |
| tarbase | hsa-miR-21-5p   | CDS1     | 1040   | ENSG00000163624 | validated |
| tarbase | hsa-miR-301a-3p | CDS1     | 1040   | ENSG00000163624 | validated |
| tarbase | hsa-miR-106b-5p | WDFY3    | 23001  | ENSG00000163625 | validated |
| tarbase | hsa-miR-144-3p  | WDFY3    | 23001  | ENSG00000163625 | validated |
| tarbase | hsa-miR-15b-5p  | WDFY3    | 23001  | ENSG00000163625 | validated |
| tarbase | hsa-miR-582-3p  | WDFY3    | 23001  | ENSG00000163625 | validated |
| tarbase | hsa-miR-181a-5p | PTPN13   | 5783   | ENSG00000163629 | validated |
| tarbase | hsa-miR-18a-5p  | PTPN13   | 5783   | ENSG00000163629 | validated |
| tarbase | hsa-miR-21-5p   | PTPN13   | 5783   | ENSG00000163629 | validated |
| tarbase | hsa-miR-582-5p  | PTPN13   | 5783   | ENSG00000163629 | validated |
| tarbase | hsa-miR-106b-5p | THOC7    | 80145  | ENSG00000163634 | validated |
| tarbase | hsa-miR-18a-5p  | ATXN7    | 6314   | ENSG00000163635 | validated |
| tarbase | hsa-miR-144-3p  | PSMD6    | 9861   | ENSG00000163636 | validated |
| tarbase | hsa-miR-181a-5p | PRICKLE2 | 166336 | ENSG00000163637 | validated |
| tarbase | hsa-miR-181a-5p | ADAMTS9  | 56999  | ENSG00000163638 | validated |
| tarbase | hsa-miR-582-5p  | ADAMTS9  | 56999  | ENSG00000163638 | validated |
| tarbase | hsa-miR-15b-5p  | PPM1K    | 152926 | ENSG00000163644 | validated |
| tarbase | hsa-miR-582-5p  | PPM1K    | 152926 | ENSG00000163644 | validated |
| tarbase | hsa-miR-18a-5p  | GMPS     | 8833   | ENSG00000163655 | validated |
| tarbase | hsa-miR-181a-5p | GMPS     | 8833   | ENSG00000163655 | validated |
| tarbase | hsa-miR-106b-5p | TIPARP   | 25976  | ENSG00000163659 | validated |
| tarbase | hsa-miR-18a-5p  | TIPARP   | 25976  | ENSG00000163659 | validated |
| tarbase | hsa-miR-21-5p   | TIPARP   | 25976  | ENSG00000163659 | validated |
| tarbase | hsa-miR-212-3p  | TIPARP   | 25976  | ENSG00000163659 | validated |
| tarbase | hsa-miR-181a-5p | SLMAP    | 7871   | ENSG00000163681 | validated |
| tarbase | hsa-miR-301a-3p | SLMAP    | 7871   | ENSG00000163681 | validated |
| tarbase | hsa-miR-181a-5p | SMIM14   | 201895 | ENSG00000163683 | validated |
| tarbase | hsa-miR-106b-5p | RPP14    | 11102  | ENSG00000163684 | validated |
| tarbase | hsa-miR-15b-5p  | C3orf67  | 200844 | ENSG00000163689 | validated |
| tarbase | hsa-miR-106b-5p | RBM47    | 54502  | ENSG00000163694 | validated |
| tarbase | hsa-miR-212-3p  | CRELD1   | 78987  | ENSG00000163703 | validated |
| tarbase | hsa-miR-21-5p   | U2SURP   | 23350  | ENSG00000163714 | validated |
| tarbase | hsa-miR-15b-5p  | TTC14    | 151613 | ENSG00000163728 | validated |
| tarbase | hsa-miR-21-5p   | CXCL3    | 2921   | ENSG00000163734 | validated |
| tarbase | hsa-miR-15b-5p  | CXCL5    | 6374   | ENSG00000163735 | validated |
| tarbase | hsa-miR-301a-3p | CXCL5    | 6374   | ENSG00000163735 | validated |
| tarbase | hsa-miR-18a-5p  | MTHFD2L  | 441024 | ENSG00000163738 | validated |
| tarbase | hsa-miR-106b-5p | MTHFD2L  | 441024 | ENSG00000163738 | validated |
| tarbase | hsa-miR-212-3p  | CXCL1    | 2919   | ENSG00000163739 | validated |
| tarbase | hsa-miR-212-3p  | RCHY1    | 25898  | ENSG00000163743 | validated |
| tarbase | hsa-miR-222-3p  | RCHY1    | 25898  | ENSG00000163743 | validated |
| tarbase | hsa-miR-212-3p  | PLSCR2   | 57047  | ENSG00000163746 | validated |
| tarbase | hsa-miR-106b-5p | HPS3     | 84343  | ENSG00000163755 | validated |
| tarbase | hsa-miR-15b-5p  | HPS3     | 84343  | ENSG00000163755 | validated |
| tarbase | hsa-miR-21-5p   | TM4SF18  | 116441 | ENSG00000163762 | validated |
| tarbase | hsa-miR-15b-5p  | SNRK     | 54861  | ENSG00000163788 | validated |
| tarbase | hsa-miR-18a-5p  | SNRK     | 54861  | ENSG00000163788 | validated |
| tarbase | hsa-miR-106b-5p | SLC4A1AP | 22950  | ENSG00000163798 | validated |
| tarbase | hsa-miR-18a-5p  | SLC4A1AP | 22950  | ENSG00000163798 | validated |
| tarbase | hsa-miR-15b-5p  | WDR43    | 23160  | ENSG00000163811 | validated |

|         |                 |         |        |                 |           |
|---------|-----------------|---------|--------|-----------------|-----------|
| tarbase | hsa-miR-181a-5p | ZDHC3   | 51304  | ENSG00000163812 | validated |
| tarbase | hsa-miR-106b-5p | CDCP1   | 64866  | ENSG00000163814 | validated |
| tarbase | hsa-miR-15b-5p  | FYCO1   | 79443  | ENSG00000163820 | validated |
| tarbase | hsa-miR-296-5p  | FYCO1   | 79443  | ENSG00000163820 | validated |
| tarbase | hsa-miR-301a-3p | FYCO1   | 79443  | ENSG00000163820 | validated |
| tarbase | hsa-miR-582-5p  | FYCO1   | 79443  | ENSG00000163820 | validated |
| tarbase | hsa-miR-212-3p  | DTX3L   | 151636 | ENSG00000163840 | validated |
| tarbase | hsa-miR-106b-5p | ZNF148  | 7707   | ENSG00000163848 | validated |
| tarbase | hsa-miR-18a-5p  | ZNF148  | 7707   | ENSG00000163848 | validated |
| tarbase | hsa-miR-21-5p   | ZNF148  | 7707   | ENSG00000163848 | validated |
| tarbase | hsa-miR-181a-5p | ZMYM6   | 9204   | ENSG00000163867 | validated |
| tarbase | hsa-miR-212-3p  | ZMYM6   | 9204   | ENSG00000163867 | validated |
| tarbase | hsa-miR-296-5p  | YEATS2  | 55689  | ENSG00000163872 | validated |
| tarbase | hsa-miR-181a-5p | SNIP1   | 79753  | ENSG00000163877 | validated |
| tarbase | hsa-miR-18a-5p  | SNIP1   | 79753  | ENSG00000163877 | validated |
| tarbase | hsa-miR-21-5p   | SNIP1   | 79753  | ENSG00000163877 | validated |
| tarbase | hsa-miR-106b-5p | POLR2H  | 5437   | ENSG00000163882 | validated |
| tarbase | hsa-miR-15b-5p  | POLR2H  | 5437   | ENSG00000163882 | validated |
| tarbase | hsa-miR-181a-5p | KLF15   | 28999  | ENSG00000163884 | validated |
| tarbase | hsa-miR-181a-5p | TMEM41A | 90407  | ENSG00000163900 | validated |
| tarbase | hsa-miR-212-3p  | TMEM41A | 90407  | ENSG00000163900 | validated |
| tarbase | hsa-miR-21-5p   | RPN1    | 6184   | ENSG00000163902 | validated |
| tarbase | hsa-miR-301a-3p | RPN1    | 6184   | ENSG00000163902 | validated |
| tarbase | hsa-miR-18a-5p  | BAP1    | 8314   | ENSG00000163930 | validated |
| tarbase | hsa-miR-505-3p  | BAP1    | 8314   | ENSG00000163930 | validated |
| tarbase | hsa-miR-18a-5p  | PRKCD   | 5580   | ENSG00000163932 | validated |
| tarbase | hsa-miR-15b-5p  | RFT1    | 91869  | ENSG00000163933 | validated |
| tarbase | hsa-miR-106b-5p | SFMBT1  | 51460  | ENSG00000163935 | validated |
| tarbase | hsa-miR-326     | SFMBT1  | 51460  | ENSG00000163935 | validated |
| tarbase | hsa-miR-582-5p  | SFMBT1  | 51460  | ENSG00000163935 | validated |
| tarbase | hsa-miR-18a-5p  | PBRM1   | 55193  | ENSG00000163939 | validated |
| tarbase | hsa-miR-18a-5p  | UVSSA   | 57654  | ENSG00000163945 | validated |
| tarbase | hsa-miR-15b-5p  | TASOR   | 23272  | ENSG00000163946 | validated |
| tarbase | hsa-miR-18a-5p  | TASOR   | 23272  | ENSG00000163946 | validated |
| tarbase | hsa-miR-301a-3p | TASOR   | 23272  | ENSG00000163946 | validated |
| tarbase | hsa-miR-106b-5p | ARHGEF3 | 50650  | ENSG00000163947 | validated |
| tarbase | hsa-miR-181a-5p | ARHGEF3 | 50650  | ENSG00000163947 | validated |
| tarbase | hsa-miR-212-3p  | SLBP    | 7884   | ENSG00000163950 | validated |
| tarbase | hsa-miR-582-3p  | SLBP    | 7884   | ENSG00000163950 | validated |
| tarbase | hsa-miR-181a-5p | SLBP    | 7884   | ENSG00000163950 | validated |
| tarbase | hsa-miR-505-3p  | LRPAP1  | 4043   | ENSG00000163956 | validated |
| tarbase | hsa-miR-106b-5p | UBXN7   | 26043  | ENSG00000163960 | validated |
| tarbase | hsa-miR-181a-5p | UBXN7   | 26043  | ENSG00000163960 | validated |
| tarbase | hsa-miR-21-5p   | RNF168  | 165918 | ENSG00000163961 | validated |
| tarbase | hsa-miR-106b-5p | S100P   | 6286   | ENSG00000163993 | validated |
| tarbase | hsa-miR-181a-5p | SGMS2   | 166929 | ENSG00000164023 | validated |
| tarbase | hsa-miR-15b-5p  | DNAJB14 | 79982  | ENSG00000164031 | validated |
| tarbase | hsa-miR-181a-5p | DNAJB14 | 79982  | ENSG00000164031 | validated |
| tarbase | hsa-miR-582-5p  | H2AZ1   | 3015   | ENSG00000164032 | validated |
| tarbase | hsa-miR-212-3p  | BDH2    | 56898  | ENSG00000164039 | validated |
| tarbase | hsa-miR-144-3p  | PGRMC2  | 10424  | ENSG00000164040 | validated |
| tarbase | hsa-miR-106b-5p | CDC25A  | 993    | ENSG00000164045 | validated |
| tarbase | hsa-miR-15b-5p  | SHISA5  | 51246  | ENSG00000164054 | validated |
| tarbase | hsa-miR-18a-5p  | SHISA5  | 51246  | ENSG00000164054 | validated |
| tarbase | hsa-miR-15b-5p  | SPRY1   | 10252  | ENSG00000164056 | validated |
| tarbase | hsa-miR-18a-5p  | BSN     | 8927   | ENSG00000164061 | validated |
| tarbase | hsa-miR-212-3p  | BSN     | 8927   | ENSG00000164061 | validated |
| tarbase | hsa-miR-212-3p  | INTU    | 27152  | ENSG00000164066 | validated |
| tarbase | hsa-miR-582-5p  | HSPA4L  | 22824  | ENSG00000164070 | validated |
| tarbase | hsa-miR-181a-5p | HSPA4L  | 22824  | ENSG00000164070 | validated |
| tarbase | hsa-miR-181a-5p | MFSB8   | 256471 | ENSG00000164073 | validated |
| tarbase | hsa-miR-21-5p   | RAD54L2 | 23132  | ENSG00000164080 | validated |
| tarbase | hsa-miR-301a-3p | RAD54L2 | 23132  | ENSG00000164080 | validated |
| tarbase | hsa-miR-326     | DUSP7   | 1849   | ENSG00000164086 | validated |
| tarbase | hsa-miR-106b-5p | WDR82   | 80335  | ENSG00000164091 | validated |
| tarbase | hsa-miR-15b-5p  | WDR82   | 80335  | ENSG00000164091 | validated |
| tarbase | hsa-miR-181a-5p | WDR82   | 80335  | ENSG00000164091 | validated |
| tarbase | hsa-miR-192-5p  | WDR82   | 80335  | ENSG00000164091 | validated |
| tarbase | hsa-miR-222-3p  | WDR82   | 80335  | ENSG00000164091 | validated |
| tarbase | hsa-miR-301a-3p | WDR82   | 80335  | ENSG00000164091 | validated |
| tarbase | hsa-miR-21-5p   | PITX2   | 5308   | ENSG00000164093 | validated |

|         |                 |          |        |                 |           |
|---------|-----------------|----------|--------|-----------------|-----------|
| tarbase | hsa-miR-212-3p  | PITX2    | 5308   | ENSG00000164093 | validated |
| tarbase | hsa-miR-18a-5p  | PRSS12   | 8492   | ENSG00000164099 | validated |
| tarbase | hsa-miR-21-5p   | HMGB2    | 3148   | ENSG00000164104 | validated |
| tarbase | hsa-miR-222-3p  | HMGB2    | 3148   | ENSG00000164104 | validated |
| tarbase | hsa-miR-15b-5p  | ANXA5    | 308    | ENSG00000164111 | validated |
| tarbase | hsa-miR-212-3p  | TMEM155  | 132332 | ENSG00000164112 | validated |
| tarbase | hsa-miR-181a-5p | MAP9     | 79884  | ENSG00000164114 | validated |
| tarbase | hsa-miR-18a-5p  | GUCY1A1  | 2982   | ENSG00000164116 | validated |
| tarbase | hsa-miR-301a-3p | GUCY1A1  | 2982   | ENSG00000164116 | validated |
| tarbase | hsa-miR-106b-5p | GUCY1A1  | 2982   | ENSG00000164116 | validated |
| tarbase | hsa-miR-18a-5p  | CEP44    | 80817  | ENSG00000164118 | validated |
| tarbase | hsa-miR-15b-5p  | TMEM144  | 55314  | ENSG00000164124 | validated |
| tarbase | hsa-miR-181a-5p | GASK1B   | 51313  | ENSG00000164125 | validated |
| tarbase | hsa-miR-301a-3p | NPY1R    | 4886   | ENSG00000164128 | validated |
| tarbase | hsa-miR-106b-5p | NAA15    | 80155  | ENSG00000164134 | validated |
| tarbase | hsa-miR-212-3p  | IL15     | 3600   | ENSG00000164136 | validated |
| tarbase | hsa-miR-15b-5p  | FAM160A1 | 729830 | ENSG00000164142 | validated |
| tarbase | hsa-miR-18a-5p  | FAM160A1 | 729830 | ENSG00000164142 | validated |
| tarbase | hsa-miR-181a-5p | ARFIP1   | 27236  | ENSG00000164144 | validated |
| tarbase | hsa-miR-212-3p  | ANAPC10  | 10393  | ENSG00000164162 | validated |
| tarbase | hsa-miR-301a-3p | ABCE1    | 6059   | ENSG00000164163 | validated |
| tarbase | hsa-miR-144-3p  | OTUD4    | 54726  | ENSG00000164164 | validated |
| tarbase | hsa-miR-15b-5p  | OTUD4    | 54726  | ENSG00000164164 | validated |
| tarbase | hsa-miR-181a-5p | OTUD4    | 54726  | ENSG00000164164 | validated |
| tarbase | hsa-miR-18a-5p  | OTUD4    | 54726  | ENSG00000164164 | validated |
| tarbase | hsa-miR-301a-3p | OTUD4    | 54726  | ENSG00000164164 | validated |
| tarbase | hsa-miR-181a-5p | TMEM184C | 55751  | ENSG00000164168 | validated |
| tarbase | hsa-miR-181a-5p | ITGA2    | 3673   | ENSG00000164171 | validated |
| tarbase | hsa-miR-326     | ITGA2    | 3673   | ENSG00000164171 | validated |
| tarbase | hsa-miR-582-5p  | ITGA2    | 3673   | ENSG00000164171 | validated |
| tarbase | hsa-miR-582-3p  | EDIL3    | 10085  | ENSG00000164176 | validated |
| tarbase | hsa-miR-15b-5p  | ELOVL7   | 79993  | ENSG00000164181 | validated |
| tarbase | hsa-miR-181a-5p | LMBRD2   | 92255  | ENSG00000164187 | validated |
| tarbase | hsa-miR-106b-5p | NIPBL    | 25836  | ENSG00000164190 | validated |
| tarbase | hsa-miR-15b-5p  | NIPBL    | 25836  | ENSG00000164190 | validated |
| tarbase | hsa-miR-181a-5p | NIPBL    | 25836  | ENSG00000164190 | validated |
| tarbase | hsa-miR-18a-5p  | NIPBL    | 25836  | ENSG00000164190 | validated |
| tarbase | hsa-miR-192-5p  | NIPBL    | 25836  | ENSG00000164190 | validated |
| tarbase | hsa-miR-582-5p  | STARD4   | 134429 | ENSG00000164211 | validated |
| tarbase | hsa-miR-212-3p  | ANKRD33B | 651746 | ENSG00000164236 | validated |
| tarbase | hsa-miR-21-5p   | CMBL     | 134147 | ENSG00000164237 | validated |
| tarbase | hsa-miR-222-3p  | CMBL     | 134147 | ENSG00000164237 | validated |
| tarbase | hsa-miR-106b-5p | PRRC1    | 133619 | ENSG00000164244 | validated |
| tarbase | hsa-miR-15b-5p  | PRRC1    | 133619 | ENSG00000164244 | validated |
| tarbase | hsa-miR-18a-5p  | PRRC1    | 133619 | ENSG00000164244 | validated |
| tarbase | hsa-miR-301a-3p | PRRC1    | 133619 | ENSG00000164244 | validated |
| tarbase | hsa-miR-181a-5p | PRRC1    | 133619 | ENSG00000164244 | validated |
| tarbase | hsa-miR-181a-5p | AGGF1    | 55109  | ENSG00000164252 | validated |
| tarbase | hsa-miR-212-3p  | WDR41    | 55255  | ENSG00000164253 | validated |
| tarbase | hsa-miR-21-5p   | RHOBTB3  | 22836  | ENSG00000164292 | validated |
| tarbase | hsa-miR-15b-5p  | RHOBTB3  | 22836  | ENSG00000164292 | validated |
| tarbase | hsa-miR-212-3p  | TIGD6    | 81789  | ENSG00000164296 | validated |
| tarbase | hsa-miR-15b-5p  | SERINC5  | 256987 | ENSG00000164300 | validated |
| tarbase | hsa-miR-144-3p  | CASP3    | 836    | ENSG00000164305 | validated |
| tarbase | hsa-miR-222-3p  | CASP3    | 836    | ENSG00000164305 | validated |
| tarbase | hsa-miR-212-3p  | ERAP2    | 64167  | ENSG00000164308 | validated |
| tarbase | hsa-miR-21-5p   | CFAP97   | 57587  | ENSG00000164323 | validated |
| tarbase | hsa-miR-18a-5p  | CFAP97   | 57587  | ENSG00000164323 | validated |
| tarbase | hsa-miR-144-3p  | RICTOR   | 253260 | ENSG00000164327 | validated |
| tarbase | hsa-miR-15b-5p  | RICTOR   | 253260 | ENSG00000164327 | validated |
| tarbase | hsa-miR-181a-5p | RICTOR   | 253260 | ENSG00000164327 | validated |
| tarbase | hsa-miR-192-5p  | RICTOR   | 253260 | ENSG00000164327 | validated |
| tarbase | hsa-miR-212-3p  | RICTOR   | 253260 | ENSG00000164327 | validated |
| tarbase | hsa-miR-582-3p  | RICTOR   | 253260 | ENSG00000164327 | validated |
| tarbase | hsa-miR-106b-5p | TENT2    | 167153 | ENSG00000164329 | validated |
| tarbase | hsa-miR-18a-5p  | TENT2    | 167153 | ENSG00000164329 | validated |
| tarbase | hsa-miR-21-5p   | TENT2    | 167153 | ENSG00000164329 | validated |
| tarbase | hsa-miR-106b-5p | ANKRA2   | 57763  | ENSG00000164331 | validated |
| tarbase | hsa-miR-15b-5p  | UBLCP1   | 134510 | ENSG00000164332 | validated |
| tarbase | hsa-miR-106b-5p | UTP15    | 84135  | ENSG00000164338 | validated |
| tarbase | hsa-miR-15b-5p  | UTP15    | 84135  | ENSG00000164338 | validated |

|         |                 |          |        |                 |           |
|---------|-----------------|----------|--------|-----------------|-----------|
| tarbase | hsa-miR-212-3p  | UTP15    | 84135  | ENSG00000164338 | validated |
| tarbase | hsa-miR-212-3p  | TLR3     | 7098   | ENSG00000164342 | validated |
| tarbase | hsa-miR-15b-5p  | CCDC127  | 133957 | ENSG00000164366 | validated |
| tarbase | hsa-miR-21-5p   | CCDC127  | 133957 | ENSG00000164366 | validated |
| tarbase | hsa-miR-21-5p   | ACSL6    | 23305  | ENSG00000164398 | validated |
| tarbase | hsa-miR-15b-5p  | ACSL6    | 23305  | ENSG00000164398 | validated |
| tarbase | hsa-miR-181a-5p | ACSL6    | 23305  | ENSG00000164398 | validated |
| tarbase | hsa-miR-181a-5p | SEPTIN8  | 23176  | ENSG00000164402 | validated |
| tarbase | hsa-miR-212-3p  | GDF9     | 2661   | ENSG00000164404 | validated |
| tarbase | hsa-miR-181a-5p | UQCRQ    | 27089  | ENSG00000164405 | validated |
| tarbase | hsa-miR-301a-3p | UQCRQ    | 27089  | ENSG00000164405 | validated |
| tarbase | hsa-miR-212-3p  | LEAP2    | 116842 | ENSG00000164406 | validated |
| tarbase | hsa-miR-106b-5p | SLC35A1  | 10559  | ENSG00000164414 | validated |
| tarbase | hsa-miR-212-3p  | SLC35A1  | 10559  | ENSG00000164414 | validated |
| tarbase | hsa-miR-106b-5p | CITED2   | 10370  | ENSG00000164442 | validated |
| tarbase | hsa-miR-181a-5p | CITED2   | 10370  | ENSG00000164442 | validated |
| tarbase | hsa-miR-106b-5p | CREBRF   | 153222 | ENSG00000164463 | validated |
| tarbase | hsa-miR-144-3p  | CREBRF   | 153222 | ENSG00000164463 | validated |
| tarbase | hsa-miR-181a-5p | CREBRF   | 153222 | ENSG00000164463 | validated |
| tarbase | hsa-miR-192-5p  | CREBRF   | 153222 | ENSG00000164463 | validated |
| tarbase | hsa-miR-21-5p   | CREBRF   | 153222 | ENSG00000164463 | validated |
| tarbase | hsa-miR-15b-5p  | DCBLD1   | 285761 | ENSG00000164465 | validated |
| tarbase | hsa-miR-15b-5p  | SFXN1    | 94081  | ENSG00000164466 | validated |
| tarbase | hsa-miR-181a-5p | SFXN1    | 94081  | ENSG00000164466 | validated |
| tarbase | hsa-miR-222-3p  | SFXN1    | 94081  | ENSG00000164466 | validated |
| tarbase | hsa-miR-301a-3p | SFXN1    | 94081  | ENSG00000164466 | validated |
| tarbase | hsa-miR-505-3p  | SFXN1    | 94081  | ENSG00000164466 | validated |
| tarbase | hsa-miR-212-3p  | DACT2    | 168002 | ENSG00000164488 | validated |
| tarbase | hsa-miR-18a-5p  | PDSS2    | 57107  | ENSG00000164494 | validated |
| tarbase | hsa-miR-212-3p  | TBX20    | 57057  | ENSG00000164532 | validated |
| tarbase | hsa-miR-106b-5p | KIAA0895 | 23366  | ENSG00000164542 | validated |
| tarbase | hsa-miR-144-3p  | KIAA0895 | 23366  | ENSG00000164542 | validated |
| tarbase | hsa-miR-18a-5p  | KIAA0895 | 23366  | ENSG00000164542 | validated |
| tarbase | hsa-miR-326     | KIAA0895 | 23366  | ENSG00000164542 | validated |
| tarbase | hsa-miR-582-3p  | KIAA0895 | 23366  | ENSG00000164542 | validated |
| tarbase | hsa-miR-212-3p  | KIAA0895 | 23366  | ENSG00000164542 | validated |
| tarbase | hsa-miR-18a-5p  | STK17A   | 9263   | ENSG00000164543 | validated |
| tarbase | hsa-miR-106b-5p | GALNT10  | 55568  | ENSG00000164574 | validated |
| tarbase | hsa-miR-15b-5p  | RPS14    | 6208   | ENSG00000164587 | validated |
| tarbase | hsa-miR-181a-5p | RPS14    | 6208   | ENSG00000164587 | validated |
| tarbase | hsa-miR-222-3p  | RPS14    | 6208   | ENSG00000164587 | validated |
| tarbase | hsa-miR-106b-5p | COG5     | 10466  | ENSG00000164597 | validated |
| tarbase | hsa-miR-21-5p   | COG5     | 10466  | ENSG00000164597 | validated |
| tarbase | hsa-miR-212-3p  | COG5     | 10466  | ENSG00000164597 | validated |
| tarbase | hsa-miR-18a-5p  | BMT2     | 154743 | ENSG00000164603 | validated |
| tarbase | hsa-miR-301a-3p | BMT2     | 154743 | ENSG00000164603 | validated |
| tarbase | hsa-miR-15b-5p  | KCNK5    | 8645   | ENSG00000164626 | validated |
| tarbase | hsa-miR-212-3p  | KIF6     | 221458 | ENSG00000164627 | validated |
| tarbase | hsa-miR-18a-5p  | ZNF12    | 7559   | ENSG00000164631 | validated |
| tarbase | hsa-miR-212-3p  | ZNF12    | 7559   | ENSG00000164631 | validated |
| tarbase | hsa-miR-21-5p   | ZNF12    | 7559   | ENSG00000164631 | validated |
| tarbase | hsa-miR-582-5p  | ZNF12    | 7559   | ENSG00000164631 | validated |
| tarbase | hsa-miR-106b-5p | MIOS     | 54468  | ENSG00000164654 | validated |
| tarbase | hsa-miR-181a-5p | MIOS     | 54468  | ENSG00000164654 | validated |
| tarbase | hsa-miR-301a-3p | MIOS     | 54468  | ENSG00000164654 | validated |
| tarbase | hsa-miR-212-3p  | IQUB     | 154865 | ENSG00000164675 | validated |
| tarbase | hsa-miR-106b-5p | ZNF704   | 619279 | ENSG00000164684 | validated |
| tarbase | hsa-miR-181a-5p | ZNF704   | 619279 | ENSG00000164684 | validated |
| tarbase | hsa-miR-106b-5p | TAGAP    | 117289 | ENSG00000164691 | validated |
| tarbase | hsa-miR-192-5p  | COL1A2   | 1278   | ENSG00000164692 | validated |
| tarbase | hsa-miR-212-3p  | FNDC1    | 84624  | ENSG00000164694 | validated |
| tarbase | hsa-miR-106b-5p | LMTK2    | 22853  | ENSG00000164715 | validated |
| tarbase | hsa-miR-301a-3p | LMTK2    | 22853  | ENSG00000164715 | validated |
| tarbase | hsa-miR-181a-5p | LMTK2    | 22853  | ENSG00000164715 | validated |
| tarbase | hsa-miR-15b-5p  | DLC1     | 10395  | ENSG00000164741 | validated |
| tarbase | hsa-miR-192-5p  | DLC1     | 10395  | ENSG00000164741 | validated |
| tarbase | hsa-miR-296-5p  | ADCY1    | 107    | ENSG00000164742 | validated |
| tarbase | hsa-miR-181a-5p | ADCY1    | 107    | ENSG00000164742 | validated |
| tarbase | hsa-miR-106b-5p | RAD21    | 5885   | ENSG00000164754 | validated |
| tarbase | hsa-miR-212-3p  | RAD21    | 5885   | ENSG00000164754 | validated |
| tarbase | hsa-miR-301a-3p | RAD21    | 5885   | ENSG00000164754 | validated |



|         |                 |          |        |                 |           |
|---------|-----------------|----------|--------|-----------------|-----------|
| tarbase | hsa-miR-582-5p  | RAD21    | 5885   | ENSG00000164754 | validated |
| tarbase | hsa-miR-181a-5p | RAD21    | 5885   | ENSG00000164754 | validated |
| tarbase | hsa-miR-15b-5p  | SLC30A8  | 169026 | ENSG00000164756 | validated |
| tarbase | hsa-miR-296-5p  | SBSPON   | 157869 | ENSG00000164764 | validated |
| tarbase | hsa-miR-296-5p  | EN2      | 2020   | ENSG00000164778 | validated |
| tarbase | hsa-miR-18a-5p  | ORC5     | 5001   | ENSG00000164815 | validated |
| tarbase | hsa-miR-212-3p  | ORC5     | 5001   | ENSG00000164815 | validated |
| tarbase | hsa-miR-15b-5p  | DNAAF5   | 54919  | ENSG00000164818 | validated |
| tarbase | hsa-miR-181a-5p | DNAAF5   | 54919  | ENSG00000164818 | validated |
| tarbase | hsa-miR-181a-5p | OSGIN2   | 734    | ENSG00000164823 | validated |
| tarbase | hsa-miR-21-5p   | SUN1     | 23353  | ENSG00000164828 | validated |
| tarbase | hsa-miR-18a-5p  | OXR1     | 55074  | ENSG00000164830 | validated |
| tarbase | hsa-miR-222-3p  | OXR1     | 55074  | ENSG00000164830 | validated |
| tarbase | hsa-miR-296-5p  | INTS1    | 26173  | ENSG00000164880 | validated |
| tarbase | hsa-miR-15b-5p  | SLC4A2   | 6522   | ENSG00000164889 | validated |
| tarbase | hsa-miR-15b-5p  | FASTK    | 10922  | ENSG00000164896 | validated |
| tarbase | hsa-miR-301a-3p | FASTK    | 10922  | ENSG00000164896 | validated |
| tarbase | hsa-miR-106b-5p | FASTK    | 10922  | ENSG00000164896 | validated |
| tarbase | hsa-miR-15b-5p  | TMUB1    | 83590  | ENSG00000164897 | validated |
| tarbase | hsa-miR-15b-5p  | PHAX     | 51808  | ENSG00000164902 | validated |
| tarbase | hsa-miR-181a-5p | FOXK1    | 221937 | ENSG00000164916 | validated |
| tarbase | hsa-miR-21-5p   | FOXK1    | 221937 | ENSG00000164916 | validated |
| tarbase | hsa-miR-582-5p  | FOXK1    | 221937 | ENSG00000164916 | validated |
| tarbase | hsa-miR-106b-5p | FZD6     | 8323   | ENSG00000164930 | validated |
| tarbase | hsa-miR-582-3p  | FZD6     | 8323   | ENSG00000164930 | validated |
| tarbase | hsa-miR-181a-5p | FZD6     | 8323   | ENSG00000164930 | validated |
| tarbase | hsa-miR-181a-5p | SLC25A32 | 81034  | ENSG00000164933 | validated |
| tarbase | hsa-miR-301a-3p | DCAF13   | 25879  | ENSG00000164934 | validated |
| tarbase | hsa-miR-144-3p  | TP53INP1 | 94241  | ENSG00000164938 | validated |
| tarbase | hsa-miR-15b-5p  | TP53INP1 | 94241  | ENSG00000164938 | validated |
| tarbase | hsa-miR-192-5p  | TP53INP1 | 94241  | ENSG00000164938 | validated |
| tarbase | hsa-miR-222-3p  | TP53INP1 | 94241  | ENSG00000164938 | validated |
| tarbase | hsa-miR-301a-3p | TP53INP1 | 94241  | ENSG00000164938 | validated |
| tarbase | hsa-miR-582-5p  | TP53INP1 | 94241  | ENSG00000164938 | validated |
| tarbase | hsa-miR-21-5p   | GEM      | 2669   | ENSG00000164949 | validated |
| tarbase | hsa-miR-15b-5p  | PDP1     | 54704  | ENSG00000164951 | validated |
| tarbase | hsa-miR-192-5p  | TMEM67   | 91147  | ENSG00000164953 | validated |
| tarbase | hsa-miR-15b-5p  | MYORG    | 57462  | ENSG00000164976 | validated |
| tarbase | hsa-miR-222-3p  | PSIP1    | 11168  | ENSG00000164985 | validated |
| tarbase | hsa-miR-181a-5p | PSIP1    | 11168  | ENSG00000164985 | validated |
| tarbase | hsa-miR-212-3p  | CCDC171  | 203238 | ENSG00000164989 | validated |
| tarbase | hsa-miR-106b-5p | UBAP1    | 51271  | ENSG00000165006 | validated |
| tarbase | hsa-miR-15b-5p  | UBAP1    | 51271  | ENSG00000165006 | validated |
| tarbase | hsa-miR-18a-5p  | UBAP1    | 51271  | ENSG00000165006 | validated |
| tarbase | hsa-miR-192-5p  | UBAP1    | 51271  | ENSG00000165006 | validated |
| tarbase | hsa-miR-296-5p  | UBAP1    | 51271  | ENSG00000165006 | validated |
| tarbase | hsa-miR-181a-5p | UBAP1    | 51271  | ENSG00000165006 | validated |
| tarbase | hsa-miR-15b-5p  | DIRAS2   | 54769  | ENSG00000165023 | validated |
| tarbase | hsa-miR-106b-5p | NFIL3    | 4783   | ENSG00000165030 | validated |
| tarbase | hsa-miR-222-3p  | METTL2B  | 55798  | ENSG00000165055 | validated |
| tarbase | hsa-miR-21-5p   | ALDH1A1  | 216    | ENSG00000165092 | validated |
| tarbase | hsa-miR-222-3p  | ALDH1A1  | 216    | ENSG00000165092 | validated |
| tarbase | hsa-miR-15b-5p  | HGSNAT   | 138050 | ENSG00000165102 | validated |
| tarbase | hsa-miR-21-5p   | HGSNAT   | 138050 | ENSG00000165102 | validated |
| tarbase | hsa-miR-222-3p  | RASEF    | 158158 | ENSG00000165105 | validated |
| tarbase | hsa-miR-106b-5p | GKAP1    | 80318  | ENSG00000165113 | validated |
| tarbase | hsa-miR-301a-3p | HNRNPK   | 3190   | ENSG00000165119 | validated |
| tarbase | hsa-miR-15b-5p  | ANKS6    | 203286 | ENSG00000165138 | validated |
| tarbase | hsa-miR-21-5p   | PGAP4    | 84302  | ENSG00000165152 | validated |
| tarbase | hsa-miR-15b-5p  | ZHX1     | 11244  | ENSG00000165156 | validated |
| tarbase | hsa-miR-181a-5p | ZHX1     | 11244  | ENSG00000165156 | validated |
| tarbase | hsa-miR-582-5p  | DYNLT3   | 6990   | ENSG00000165169 | validated |
| tarbase | hsa-miR-15b-5p  | DYNLT3   | 6990   | ENSG00000165169 | validated |
| tarbase | hsa-miR-181a-5p | DYNLT3   | 6990   | ENSG00000165169 | validated |
| tarbase | hsa-miR-505-3p  | KIAA1958 | 158405 | ENSG00000165185 | validated |
| tarbase | hsa-miR-212-3p  | RNF183   | 138065 | ENSG00000165188 | validated |
| tarbase | hsa-miR-181a-5p | STRBP    | 55342  | ENSG00000165209 | validated |
| tarbase | hsa-miR-582-3p  | STRBP    | 55342  | ENSG00000165209 | validated |
| tarbase | hsa-miR-106b-5p | GAPVD1   | 26130  | ENSG00000165219 | validated |
| tarbase | hsa-miR-181a-5p | GAPVD1   | 26130  | ENSG00000165219 | validated |
| tarbase | hsa-miR-222-3p  | ATP7A    | 538    | ENSG00000165240 | validated |

|         |                 |          |        |                 |           |
|---------|-----------------|----------|--------|-----------------|-----------|
| tarbase | hsa-miR-106b-5p | ZNF367   | 195828 | ENSG00000165244 | validated |
| tarbase | hsa-miR-144-3p  | ZNF367   | 195828 | ENSG00000165244 | validated |
| tarbase | hsa-miR-181a-5p | ZNF367   | 195828 | ENSG00000165244 | validated |
| tarbase | hsa-miR-222-3p  | ZNF367   | 195828 | ENSG00000165244 | validated |
| tarbase | hsa-miR-582-5p  | ZNF367   | 195828 | ENSG00000165244 | validated |
| tarbase | hsa-miR-15b-5p  | VCP      | 7415   | ENSG00000165280 | validated |
| tarbase | hsa-miR-301a-3p | VCP      | 7415   | ENSG00000165280 | validated |
| tarbase | hsa-miR-15b-5p  | PIGO     | 84720  | ENSG00000165282 | validated |
| tarbase | hsa-miR-21-5p   | PIGO     | 84720  | ENSG00000165282 | validated |
| tarbase | hsa-miR-212-3p  | SLITRK5  | 26050  | ENSG00000165300 | validated |
| tarbase | hsa-miR-106b-5p | OTUD1    | 220213 | ENSG00000165312 | validated |
| tarbase | hsa-miR-18a-5p  | OTUD1    | 220213 | ENSG00000165312 | validated |
| tarbase | hsa-miR-18a-5p  | ARHGAP12 | 94134  | ENSG00000165322 | validated |
| tarbase | hsa-miR-582-5p  | ARHGAP12 | 94134  | ENSG00000165322 | validated |
| tarbase | hsa-miR-212-3p  | ARHGAP12 | 94134  | ENSG00000165322 | validated |
| tarbase | hsa-miR-21-5p   | FAT3     | 120114 | ENSG00000165323 | validated |
| tarbase | hsa-miR-301a-3p | FAT3     | 120114 | ENSG00000165323 | validated |
| tarbase | hsa-miR-15b-5p  | FAT3     | 120114 | ENSG00000165323 | validated |
| tarbase | hsa-miR-106b-5p | HECTD2   | 143279 | ENSG00000165338 | validated |
| tarbase | hsa-miR-181a-5p | HECTD2   | 143279 | ENSG00000165338 | validated |
| tarbase | hsa-miR-222-3p  | HECTD2   | 143279 | ENSG00000165338 | validated |
| tarbase | hsa-miR-301a-3p | SPTSSA   | 171546 | ENSG00000165389 | validated |
| tarbase | hsa-miR-301a-3p | MARCHF8  | 220972 | ENSG00000165406 | validated |
| tarbase | hsa-miR-106b-5p | MARCHF8  | 220972 | ENSG00000165406 | validated |
| tarbase | hsa-miR-18a-5p  | CFL2     | 1073   | ENSG00000165410 | validated |
| tarbase | hsa-miR-15b-5p  | SUGT1    | 10910  | ENSG00000165416 | validated |
| tarbase | hsa-miR-181a-5p | SUGT1    | 10910  | ENSG00000165416 | validated |
| tarbase | hsa-miR-21-5p   | SUGT1    | 10910  | ENSG00000165416 | validated |
| tarbase | hsa-miR-582-5p  | SUGT1    | 10910  | ENSG00000165416 | validated |
| tarbase | hsa-miR-106b-5p | GTF2A1   | 2957   | ENSG00000165417 | validated |
| tarbase | hsa-miR-144-3p  | GTF2A1   | 2957   | ENSG00000165417 | validated |
| tarbase | hsa-miR-181a-5p | GTF2A1   | 2957   | ENSG00000165417 | validated |
| tarbase | hsa-miR-18a-5p  | GTF2A1   | 2957   | ENSG00000165417 | validated |
| tarbase | hsa-miR-212-3p  | GTF2A1   | 2957   | ENSG00000165417 | validated |
| tarbase | hsa-miR-582-3p  | GTF2A1   | 2957   | ENSG00000165417 | validated |
| tarbase | hsa-miR-222-3p  | ZCCHC24  | 219654 | ENSG00000165424 | validated |
| tarbase | hsa-miR-106b-5p | ZCCHC24  | 219654 | ENSG00000165424 | validated |
| tarbase | hsa-miR-301a-3p | PGM2L1   | 283209 | ENSG00000165434 | validated |
| tarbase | hsa-miR-15b-5p  | PGM2L1   | 283209 | ENSG00000165434 | validated |
| tarbase | hsa-miR-181a-5p | PGM2L1   | 283209 | ENSG00000165434 | validated |
| tarbase | hsa-miR-15b-5p  | SLC16A9  | 220963 | ENSG00000165449 | validated |
| tarbase | hsa-miR-212-3p  | SLC16A9  | 220963 | ENSG00000165449 | validated |
| tarbase | hsa-miR-296-5p  | CRYL1    | 51084  | ENSG00000165475 | validated |
| tarbase | hsa-miR-212-3p  | REEP3    | 221035 | ENSG00000165476 | validated |
| tarbase | hsa-miR-181a-5p | SKA3     | 221150 | ENSG00000165480 | validated |
| tarbase | hsa-miR-301a-3p | SKA3     | 221150 | ENSG00000165480 | validated |
| tarbase | hsa-miR-106b-5p | DDIAS    | 220042 | ENSG00000165490 | validated |
| tarbase | hsa-miR-301a-3p | DDIAS    | 220042 | ENSG00000165490 | validated |
| tarbase | hsa-miR-18a-5p  | PCF11    | 51585  | ENSG00000165494 | validated |
| tarbase | hsa-miR-106b-5p | LRR1     | 122769 | ENSG00000165501 | validated |
| tarbase | hsa-miR-296-5p  | DEPP1    | 11067  | ENSG00000165507 | validated |
| tarbase | hsa-miR-181a-5p | ZNF22    | 7570   | ENSG00000165512 | validated |
| tarbase | hsa-miR-582-5p  | KLHDC2   | 23588  | ENSG00000165516 | validated |
| tarbase | hsa-miR-212-3p  | EML5     | 161436 | ENSG00000165521 | validated |
| tarbase | hsa-miR-15b-5p  | NEMF     | 9147   | ENSG00000165525 | validated |
| tarbase | hsa-miR-15b-5p  | RPUSD4   | 84881  | ENSG00000165526 | validated |
| tarbase | hsa-miR-106b-5p | ARF6     | 382    | ENSG00000165527 | validated |
| tarbase | hsa-miR-181a-5p | TTC8     | 123016 | ENSG00000165533 | validated |
| tarbase | hsa-miR-181a-5p | AMER2    | 219287 | ENSG00000165566 | validated |
| tarbase | hsa-miR-582-5p  | KBTBD6   | 89890  | ENSG00000165572 | validated |
| tarbase | hsa-miR-212-3p  | OXGR1    | 27199  | ENSG00000165621 | validated |
| tarbase | hsa-miR-222-3p  | TAF3     | 83860  | ENSG00000165632 | validated |
| tarbase | hsa-miR-582-5p  | TAF3     | 83860  | ENSG00000165632 | validated |
| tarbase | hsa-miR-181a-5p | TAF3     | 83860  | ENSG00000165632 | validated |
| tarbase | hsa-miR-212-3p  | COMTD1   | 118881 | ENSG00000165644 | validated |
| tarbase | hsa-miR-15b-5p  | SLC18A2  | 6571   | ENSG00000165646 | validated |
| tarbase | hsa-miR-212-3p  | SLC18A2  | 6571   | ENSG00000165646 | validated |
| tarbase | hsa-miR-15b-5p  | PDZD8    | 118987 | ENSG00000165650 | validated |
| tarbase | hsa-miR-21-5p   | PDZD8    | 118987 | ENSG00000165650 | validated |
| tarbase | hsa-miR-296-5p  | PDZD8    | 118987 | ENSG00000165650 | validated |
| tarbase | hsa-miR-301a-3p | PDZD8    | 118987 | ENSG00000165650 | validated |

|         |                 |          |        |                 |           |
|---------|-----------------|----------|--------|-----------------|-----------|
| tarbase | hsa-miR-582-3p  | PDZD8    | 118987 | ENSG00000165650 | validated |
| tarbase | hsa-miR-181a-5p | ABRAXAS2 | 23172  | ENSG00000165660 | validated |
| tarbase | hsa-miR-301a-3p | ABRAXAS2 | 23172  | ENSG00000165660 | validated |
| tarbase | hsa-miR-18a-5p  | QSOX2    | 169714 | ENSG00000165661 | validated |
| tarbase | hsa-miR-21-5p   | QSOX2    | 169714 | ENSG00000165661 | validated |
| tarbase | hsa-miR-106b-5p | NSD1     | 64324  | ENSG00000165671 | validated |
| tarbase | hsa-miR-144-3p  | NSD1     | 64324  | ENSG00000165671 | validated |
| tarbase | hsa-miR-15b-5p  | NSD1     | 64324  | ENSG00000165671 | validated |
| tarbase | hsa-miR-181a-5p | NSD1     | 64324  | ENSG00000165671 | validated |
| tarbase | hsa-miR-192-5p  | NSD1     | 64324  | ENSG00000165671 | validated |
| tarbase | hsa-miR-222-3p  | NSD1     | 64324  | ENSG00000165671 | validated |
| tarbase | hsa-miR-296-5p  | NSD1     | 64324  | ENSG00000165671 | validated |
| tarbase | hsa-miR-326     | NSD1     | 64324  | ENSG00000165671 | validated |
| tarbase | hsa-miR-106b-5p | PRDX3    | 10935  | ENSG00000165672 | validated |
| tarbase | hsa-miR-18a-5p  | PRDX3    | 10935  | ENSG00000165672 | validated |
| tarbase | hsa-miR-21-5p   | PRDX3    | 10935  | ENSG00000165672 | validated |
| tarbase | hsa-miR-181a-5p | GHITM    | 27069  | ENSG00000165678 | validated |
| tarbase | hsa-miR-15b-5p  | PMPCA    | 23203  | ENSG00000165688 | validated |
| tarbase | hsa-miR-21-5p   | TSC1     | 7248   | ENSG00000165699 | validated |
| tarbase | hsa-miR-301a-3p | TSC1     | 7248   | ENSG00000165699 | validated |
| tarbase | hsa-miR-144-3p  | HPRT1    | 3251   | ENSG00000165704 | validated |
| tarbase | hsa-miR-144-3p  | DIPK1B   | 138311 | ENSG00000165716 | validated |
| tarbase | hsa-miR-15b-5p  | DIPK1B   | 138311 | ENSG00000165716 | validated |
| tarbase | hsa-miR-296-5p  | DIPK1B   | 138311 | ENSG00000165716 | validated |
| tarbase | hsa-miR-301a-3p | DIPK1B   | 138311 | ENSG00000165716 | validated |
| tarbase | hsa-miR-106b-5p | DDX21    | 9188   | ENSG00000165732 | validated |
| tarbase | hsa-miR-15b-5p  | DDX21    | 9188   | ENSG00000165732 | validated |
| tarbase | hsa-miR-181a-5p | DDX21    | 9188   | ENSG00000165732 | validated |
| tarbase | hsa-miR-21-5p   | DDX21    | 9188   | ENSG00000165732 | validated |
| tarbase | hsa-miR-301a-3p | DDX21    | 9188   | ENSG00000165732 | validated |
| tarbase | hsa-miR-106b-5p | JCAD     | 57608  | ENSG00000165757 | validated |
| tarbase | hsa-miR-296-5p  | JCAD     | 57608  | ENSG00000165757 | validated |
| tarbase | hsa-miR-301a-3p | JCAD     | 57608  | ENSG00000165757 | validated |
| tarbase | hsa-miR-212-3p  | JCAD     | 57608  | ENSG00000165757 | validated |
| tarbase | hsa-miR-192-5p  | PIP4P1   | 90809  | ENSG00000165782 | validated |
| tarbase | hsa-miR-301a-3p | PIP4P1   | 90809  | ENSG00000165782 | validated |
| tarbase | hsa-miR-296-5p  | ZNF219   | 51222  | ENSG00000165804 | validated |
| tarbase | hsa-miR-301a-3p | ZNF219   | 51222  | ENSG00000165804 | validated |
| tarbase | hsa-miR-18a-5p  | CASP7    | 840    | ENSG00000165806 | validated |
| tarbase | hsa-miR-212-3p  | CASP7    | 840    | ENSG00000165806 | validated |
| tarbase | hsa-miR-582-5p  | CCDC186  | 55088  | ENSG00000165813 | validated |
| tarbase | hsa-miR-106b-5p | TRUB1    | 142940 | ENSG00000165832 | validated |
| tarbase | hsa-miR-181a-5p | TRUB1    | 142940 | ENSG00000165832 | validated |
| tarbase | hsa-miR-15b-5p  | TRUB1    | 142940 | ENSG00000165832 | validated |
| tarbase | hsa-miR-106b-5p | ZFYVE1   | 53349  | ENSG00000165861 | validated |
| tarbase | hsa-miR-15b-5p  | ZFYVE1   | 53349  | ENSG00000165861 | validated |
| tarbase | hsa-miR-181a-5p | HSPA12A  | 259217 | ENSG00000165868 | validated |
| tarbase | hsa-miR-212-3p  | ANKRD2   | 26287  | ENSG00000165887 | validated |
| tarbase | hsa-miR-106b-5p | E2F7     | 144455 | ENSG00000165891 | validated |
| tarbase | hsa-miR-181a-5p | E2F7     | 144455 | ENSG00000165891 | validated |
| tarbase | hsa-miR-18a-5p  | E2F7     | 144455 | ENSG00000165891 | validated |
| tarbase | hsa-miR-212-3p  | E2F7     | 144455 | ENSG00000165891 | validated |
| tarbase | hsa-miR-301a-3p | E2F7     | 144455 | ENSG00000165891 | validated |
| tarbase | hsa-miR-582-5p  | OTOGL    | 283310 | ENSG00000165899 | validated |
| tarbase | hsa-miR-15b-5p  | LARGE2   | 120071 | ENSG00000165905 | validated |
| tarbase | hsa-miR-21-5p   | PSMC3    | 5702   | ENSG00000165916 | validated |
| tarbase | hsa-miR-21-5p   | TC2N     | 123036 | ENSG00000165929 | validated |
| tarbase | hsa-miR-212-3p  | IFI27    | 3429   | ENSG00000165949 | validated |
| tarbase | hsa-miR-15b-5p  | CLMN     | 79789  | ENSG00000165959 | validated |
| tarbase | hsa-miR-582-3p  | CLMN     | 79789  | ENSG00000165959 | validated |
| tarbase | hsa-miR-301a-3p | PTER     | 9317   | ENSG00000165983 | validated |
| tarbase | hsa-miR-212-3p  | PTER     | 9317   | ENSG00000165983 | validated |
| tarbase | hsa-miR-15b-5p  | C1QL3    | 389941 | ENSG00000165985 | validated |
| tarbase | hsa-miR-144-3p  | CACNB2   | 783    | ENSG00000165995 | validated |
| tarbase | hsa-miR-106b-5p | ARL5B    | 221079 | ENSG00000165997 | validated |
| tarbase | hsa-miR-15b-5p  | ARL5B    | 221079 | ENSG00000165997 | validated |
| tarbase | hsa-miR-181a-5p | ARL5B    | 221079 | ENSG00000165997 | validated |
| tarbase | hsa-miR-18a-5p  | ARL5B    | 221079 | ENSG00000165997 | validated |
| tarbase | hsa-miR-192-5p  | ARL5B    | 221079 | ENSG00000165997 | validated |
| tarbase | hsa-miR-212-3p  | ARL5B    | 221079 | ENSG00000165997 | validated |
| tarbase | hsa-miR-582-5p  | SMCO4    | 56935  | ENSG00000166002 | validated |

|         |                 |          |        |                 |           |
|---------|-----------------|----------|--------|-----------------|-----------|
| tarbase | hsa-miR-212-3p  | SMCO4    | 56935  | ENSG00000166002 | validated |
| tarbase | hsa-miR-18a-5p  | SMCO4    | 56935  | ENSG00000166002 | validated |
| tarbase | hsa-miR-15b-5p  | KCNC2    | 3747   | ENSG00000166006 | validated |
| tarbase | hsa-miR-181a-5p | KCNC2    | 3747   | ENSG00000166006 | validated |
| tarbase | hsa-miR-18a-5p  | R3HCC1L  | 27291  | ENSG00000166024 | validated |
| tarbase | hsa-miR-301a-3p | AMOTL1   | 154810 | ENSG00000166025 | validated |
| tarbase | hsa-miR-181a-5p | AMOTL1   | 154810 | ENSG00000166025 | validated |
| tarbase | hsa-miR-15b-5p  | HTRA1    | 5654   | ENSG00000166033 | validated |
| tarbase | hsa-miR-181a-5p | CEP57    | 9702   | ENSG00000166037 | validated |
| tarbase | hsa-miR-181a-5p | SPRED1   | 161742 | ENSG00000166068 | validated |
| tarbase | hsa-miR-106b-5p | GPR176   | 11245  | ENSG00000166073 | validated |
| tarbase | hsa-miR-18a-5p  | GPR176   | 11245  | ENSG00000166073 | validated |
| tarbase | hsa-miR-582-5p  | GLB1L3   | 112937 | ENSG00000166105 | validated |
| tarbase | hsa-miR-301a-3p | GPT2     | 84706  | ENSG00000166123 | validated |
| tarbase | hsa-miR-106b-5p | RAB8B    | 51762  | ENSG00000166128 | validated |
| tarbase | hsa-miR-181a-5p | RAB8B    | 51762  | ENSG00000166128 | validated |
| tarbase | hsa-miR-181a-5p | IKBIP    | 121457 | ENSG00000166130 | validated |
| tarbase | hsa-miR-18a-5p  | HIF1AN   | 55662  | ENSG00000166135 | validated |
| tarbase | hsa-miR-301a-3p | HIF1AN   | 55662  | ENSG00000166135 | validated |
| tarbase | hsa-miR-212-3p  | PPP1R14D | 54866  | ENSG00000166143 | validated |
| tarbase | hsa-miR-106b-5p | FBN1     | 2200   | ENSG00000166147 | validated |
| tarbase | hsa-miR-181a-5p | FBN1     | 2200   | ENSG00000166147 | validated |
| tarbase | hsa-miR-21-5p   | FBN1     | 2200   | ENSG00000166147 | validated |
| tarbase | hsa-miR-582-3p  | FBN1     | 2200   | ENSG00000166147 | validated |
| tarbase | hsa-miR-582-5p  | FBN1     | 2200   | ENSG00000166147 | validated |
| tarbase | hsa-miR-15b-5p  | LRTM2    | 654429 | ENSG00000166159 | validated |
| tarbase | hsa-miR-212-3p  | LRTM2    | 654429 | ENSG00000166159 | validated |
| tarbase | hsa-miR-21-5p   | BRD7     | 29117  | ENSG00000166164 | validated |
| tarbase | hsa-miR-296-5p  | BRD7     | 29117  | ENSG00000166164 | validated |
| tarbase | hsa-miR-15b-5p  | CKB      | 1152   | ENSG00000166165 | validated |
| tarbase | hsa-miR-21-5p   | CKB      | 1152   | ENSG00000166165 | validated |
| tarbase | hsa-miR-106b-5p | BTRC     | 8945   | ENSG00000166167 | validated |
| tarbase | hsa-miR-21-5p   | BTRC     | 8945   | ENSG00000166167 | validated |
| tarbase | hsa-miR-192-5p  | POLL     | 27343  | ENSG00000166169 | validated |
| tarbase | hsa-miR-296-5p  | POLL     | 27343  | ENSG00000166169 | validated |
| tarbase | hsa-miR-15b-5p  | BAG5     | 9529   | ENSG00000166170 | validated |
| tarbase | hsa-miR-18a-5p  | BAG5     | 9529   | ENSG00000166170 | validated |
| tarbase | hsa-miR-301a-3p | BAG5     | 9529   | ENSG00000166170 | validated |
| tarbase | hsa-miR-192-5p  | NOLC1    | 9221   | ENSG00000166197 | validated |
| tarbase | hsa-miR-212-3p  | NOLC1    | 9221   | ENSG00000166197 | validated |
| tarbase | hsa-miR-106b-5p | COPS2    | 9318   | ENSG00000166200 | validated |
| tarbase | hsa-miR-582-3p  | GABRB3   | 2562   | ENSG00000166206 | validated |
| tarbase | hsa-miR-222-3p  | SGPL1    | 8879   | ENSG00000166224 | validated |
| tarbase | hsa-miR-326     | SGPL1    | 8879   | ENSG00000166224 | validated |
| tarbase | hsa-miR-15b-5p  | FRS2     | 10818  | ENSG00000166225 | validated |
| tarbase | hsa-miR-181a-5p | FRS2     | 10818  | ENSG00000166225 | validated |
| tarbase | hsa-miR-212-3p  | FRS2     | 10818  | ENSG00000166225 | validated |
| tarbase | hsa-miR-222-3p  | FRS2     | 10818  | ENSG00000166225 | validated |
| tarbase | hsa-miR-582-3p  | FRS2     | 10818  | ENSG00000166225 | validated |
| tarbase | hsa-miR-505-3p  | FRS2     | 10818  | ENSG00000166225 | validated |
| tarbase | hsa-miR-106b-5p | CCT2     | 10576  | ENSG00000166226 | validated |
| tarbase | hsa-miR-505-3p  | CCT2     | 10576  | ENSG00000166226 | validated |
| tarbase | hsa-miR-582-3p  | CCT2     | 10576  | ENSG00000166226 | validated |
| tarbase | hsa-miR-582-5p  | CCT2     | 10576  | ENSG00000166226 | validated |
| tarbase | hsa-miR-106b-5p | ARIH1    | 25820  | ENSG00000166233 | validated |
| tarbase | hsa-miR-181a-5p | ARIH1    | 25820  | ENSG00000166233 | validated |
| tarbase | hsa-miR-212-3p  | SCN3B    | 55800  | ENSG00000166257 | validated |
| tarbase | hsa-miR-181a-5p | COX11    | 1353   | ENSG00000166260 | validated |
| tarbase | hsa-miR-15b-5p  | ZNF202   | 7753   | ENSG00000166261 | validated |
| tarbase | hsa-miR-212-3p  | STXBP4   | 252983 | ENSG00000166263 | validated |
| tarbase | hsa-miR-326     |          |        | ENSG00000166272 | validated |
| tarbase | hsa-miR-582-5p  | BORCS7   | 119032 | ENSG00000166275 | validated |
| tarbase | hsa-miR-212-3p  | TMEM100  | 55273  | ENSG00000166292 | validated |
| tarbase | hsa-miR-222-3p  | ANAPC16  | 119504 | ENSG00000166295 | validated |
| tarbase | hsa-miR-326     | SMPD1    | 6609   | ENSG00000166311 | validated |
| tarbase | hsa-miR-15b-5p  | APBB1    | 322    | ENSG00000166313 | validated |
| tarbase | hsa-miR-212-3p  | C11orf65 | 160140 | ENSG00000166323 | validated |
| tarbase | hsa-miR-15b-5p  | TRIM44   | 54765  | ENSG00000166326 | validated |
| tarbase | hsa-miR-15b-5p  | PPFIBP2  | 8495   | ENSG00000166387 | validated |
| tarbase | hsa-miR-212-3p  | CYB5R2   | 51700  | ENSG00000166394 | validated |
| tarbase | hsa-miR-222-3p  | TUB      | 7275   | ENSG00000166402 | validated |

|         |                 |         |        |                 |           |
|---------|-----------------|---------|--------|-----------------|-----------|
| tarbase | hsa-miR-296-5p  | TUB     | 7275   | ENSG00000166402 | validated |
| tarbase | hsa-miR-326     | TUB     | 7275   | ENSG00000166402 | validated |
| tarbase | hsa-miR-326     | RPL27A  | 6157   | ENSG00000166441 | validated |
| tarbase | hsa-miR-21-5p   | DENND2B | 6764   | ENSG00000166444 | validated |
| tarbase | hsa-miR-144-3p  | CDYL2   | 124359 | ENSG00000166446 | validated |
| tarbase | hsa-miR-15b-5p  | TMEM130 | 222865 | ENSG00000166448 | validated |
| tarbase | hsa-miR-181a-5p | PRTG    | 283659 | ENSG00000166450 | validated |
| tarbase | hsa-miR-15b-5p  | CENPN   | 55839  | ENSG00000166451 | validated |
| tarbase | hsa-miR-212-3p  | TMEM41B | 440026 | ENSG00000166471 | validated |
| tarbase | hsa-miR-106b-5p | ZNF143  | 7702   | ENSG00000166478 | validated |
| tarbase | hsa-miR-582-3p  | ZNF143  | 7702   | ENSG00000166478 | validated |
| tarbase | hsa-miR-181a-5p | TMX3    | 54495  | ENSG00000166479 | validated |
| tarbase | hsa-miR-144-3p  | WEE1    | 7465   | ENSG00000166483 | validated |
| tarbase | hsa-miR-181a-5p | WEE1    | 7465   | ENSG00000166483 | validated |
| tarbase | hsa-miR-212-3p  | WEE1    | 7465   | ENSG00000166483 | validated |
| tarbase | hsa-miR-21-5p   | WEE1    | 7465   | ENSG00000166483 | validated |
| tarbase | hsa-miR-222-3p  | WEE1    | 7465   | ENSG00000166483 | validated |
| tarbase | hsa-miR-106b-5p | MAPK7   | 5598   | ENSG00000166484 | validated |
| tarbase | hsa-miR-15b-5p  | HDGFL3  | 50810  | ENSG00000166503 | validated |
| tarbase | hsa-miR-15b-5p  | MCM7    | 4176   | ENSG00000166508 | validated |
| tarbase | hsa-miR-301a-3p | MCM7    | 4176   | ENSG00000166508 | validated |
| tarbase | hsa-miR-106b-5p | MCM7    | 4176   | ENSG00000166508 | validated |
| tarbase | hsa-miR-301a-3p | ZNF3    | 7551   | ENSG00000166526 | validated |
| tarbase | hsa-miR-326     | ZNF3    | 7551   | ENSG00000166526 | validated |
| tarbase | hsa-miR-181a-5p | RIMKLB  | 57494  | ENSG00000166532 | validated |
| tarbase | hsa-miR-326     | RIMKLB  | 57494  | ENSG00000166532 | validated |
| tarbase | hsa-miR-15b-5p  | RIMKLB  | 57494  | ENSG00000166532 | validated |
| tarbase | hsa-miR-15b-5p  | TMED3   | 23423  | ENSG00000166557 | validated |
| tarbase | hsa-miR-106b-5p | TMEM135 | 65084  | ENSG00000166575 | validated |
| tarbase | hsa-miR-181a-5p | TMEM135 | 65084  | ENSG00000166575 | validated |
| tarbase | hsa-miR-212-3p  | IQCD    | 115811 | ENSG00000166578 | validated |
| tarbase | hsa-miR-18a-5p  | NDEL1   | 81565  | ENSG00000166579 | validated |
| tarbase | hsa-miR-301a-3p | NDEL1   | 81565  | ENSG00000166579 | validated |
| tarbase | hsa-miR-326     | NDEL1   | 81565  | ENSG00000166579 | validated |
| tarbase | hsa-miR-21-5p   | HSP90B1 | 7184   | ENSG00000166598 | validated |
| tarbase | hsa-miR-106b-5p | HSP90B1 | 7184   | ENSG00000166598 | validated |
| tarbase | hsa-miR-15b-5p  | BLCAP   | 10904  | ENSG00000166619 | validated |
| tarbase | hsa-miR-181a-5p | BLCAP   | 10904  | ENSG00000166619 | validated |
| tarbase | hsa-miR-21-5p   | BEX3    | 27018  | ENSG00000166681 | validated |
| tarbase | hsa-miR-301a-3p | BEX3    | 27018  | ENSG00000166681 | validated |
| tarbase | hsa-miR-21-5p   | COG1    | 9382   | ENSG00000166685 | validated |
| tarbase | hsa-miR-326     | ZNF606  | 80095  | ENSG00000166704 | validated |
| tarbase | hsa-miR-181a-5p | ZNF606  | 80095  | ENSG00000166704 | validated |
| tarbase | hsa-miR-192-5p  | B2M     | 567    | ENSG00000166710 | validated |
| tarbase | hsa-miR-212-3p  | B2M     | 567    | ENSG00000166710 | validated |
| tarbase | hsa-miR-21-5p   | B2M     | 567    | ENSG00000166710 | validated |
| tarbase | hsa-miR-106b-5p | ZNF592  | 9640   | ENSG00000166716 | validated |
| tarbase | hsa-miR-15b-5p  | ZNF592  | 9640   | ENSG00000166716 | validated |
| tarbase | hsa-miR-582-3p  | ZNF592  | 9640   | ENSG00000166716 | validated |
| tarbase | hsa-miR-212-3p  | AP1G1   | 164    | ENSG00000166747 | validated |
| tarbase | hsa-miR-222-3p  | AP1G1   | 164    | ENSG00000166747 | validated |
| tarbase | hsa-miR-301a-3p | AP1G1   | 164    | ENSG00000166747 | validated |
| tarbase | hsa-miR-582-3p  | SLFN5   | 162394 | ENSG00000166750 | validated |
| tarbase | hsa-miR-212-3p  | SLFN5   | 162394 | ENSG00000166750 | validated |
| tarbase | hsa-miR-18a-5p  | MARF1   | 9665   | ENSG00000166783 | validated |
| tarbase | hsa-miR-582-5p  | CIAO2A  | 84191  | ENSG00000166797 | validated |
| tarbase | hsa-miR-15b-5p  | FAM111A | 63901  | ENSG00000166801 | validated |
| tarbase | hsa-miR-212-3p  | LDHD    | 197257 | ENSG00000166816 | validated |
| tarbase | hsa-miR-212-3p  | PLIN1   | 5346   | ENSG00000166819 | validated |
| tarbase | hsa-miR-18a-5p  | MESP1   | 55897  | ENSG00000166823 | validated |
| tarbase | hsa-miR-326     | NAV2    | 89797  | ENSG00000166833 | validated |
| tarbase | hsa-miR-212-3p  | DCTN5   | 84516  | ENSG00000166847 | validated |
| tarbase | hsa-miR-505-3p  | DCTN5   | 84516  | ENSG00000166847 | validated |
| tarbase | hsa-miR-21-5p   | PLK1    | 5347   | ENSG00000166851 | validated |
| tarbase | hsa-miR-212-3p  | PLK1    | 5347   | ENSG00000166851 | validated |
| tarbase | hsa-miR-106b-5p | PLK1    | 5347   | ENSG00000166851 | validated |
| tarbase | hsa-miR-15b-5p  | CLPX    | 10845  | ENSG00000166855 | validated |
| tarbase | hsa-miR-15b-5p  | ZBTB39  | 9880   | ENSG00000166860 | validated |
| tarbase | hsa-miR-212-3p  | ZBTB39  | 9880   | ENSG00000166860 | validated |
| tarbase | hsa-miR-212-3p  | CHP2    | 63928  | ENSG00000166869 | validated |
| tarbase | hsa-miR-181a-5p | NEMP1   | 23306  | ENSG00000166881 | validated |

|         |                 |          |        |                 |           |
|---------|-----------------|----------|--------|-----------------|-----------|
| tarbase | hsa-miR-212-3p  | NEMP1    | 23306  | ENSG00000166881 | validated |
| tarbase | hsa-miR-181a-5p | PATL1    | 219988 | ENSG00000166889 | validated |
| tarbase | hsa-miR-106b-5p | STX3     | 6809   | ENSG00000166900 | validated |
| tarbase | hsa-miR-222-3p  | STX3     | 6809   | ENSG00000166900 | validated |
| tarbase | hsa-miR-301a-3p | STX3     | 6809   | ENSG00000166900 | validated |
| tarbase | hsa-miR-21-5p   | MRPL16   | 54948  | ENSG00000166902 | validated |
| tarbase | hsa-miR-181a-5p | PIP4K2C  | 79837  | ENSG00000166908 | validated |
| tarbase | hsa-miR-15b-5p  | MTMR10   | 54893  | ENSG00000166912 | validated |
| tarbase | hsa-miR-144-3p  | YWHAB    | 7529   | ENSG00000166913 | validated |
| tarbase | hsa-miR-15b-5p  | YWHAB    | 7529   | ENSG00000166913 | validated |
| tarbase | hsa-miR-181a-5p | YWHAB    | 7529   | ENSG00000166913 | validated |
| tarbase | hsa-miR-212-3p  | YWHAB    | 7529   | ENSG00000166913 | validated |
| tarbase | hsa-miR-301a-3p | YWHAB    | 7529   | ENSG00000166913 | validated |
| tarbase | hsa-miR-212-3p  | C15orf48 | 84419  | ENSG00000166920 | validated |
| tarbase | hsa-miR-212-3p  | SCG5     | 6447   | ENSG00000166922 | validated |
| tarbase | hsa-miR-301a-3p | CCNDBP1  | 23582  | ENSG00000166946 | validated |
| tarbase | hsa-miR-144-3p  | MAP1A    | 4130   | ENSG00000166963 | validated |
| tarbase | hsa-miR-15b-5p  | MAP1A    | 4130   | ENSG00000166963 | validated |
| tarbase | hsa-miR-15b-5p  | AKTIP    | 64400  | ENSG00000166971 | validated |
| tarbase | hsa-miR-15b-5p  | MAPRE2   | 10982  | ENSG00000166974 | validated |
| tarbase | hsa-miR-106b-5p | MARS1    | 4141   | ENSG00000166986 | validated |
| tarbase | hsa-miR-15b-5p  | MARS1    | 4141   | ENSG00000166986 | validated |
| tarbase | hsa-miR-181a-5p | MBD6     | 114785 | ENSG00000166987 | validated |
| tarbase | hsa-miR-296-5p  | MBD6     | 114785 | ENSG00000166987 | validated |
| tarbase | hsa-miR-181a-5p | NUDT21   | 11051  | ENSG00000167005 | validated |
| tarbase | hsa-miR-21-5p   | NUDT21   | 11051  | ENSG00000167005 | validated |
| tarbase | hsa-miR-144-3p  | NKX3-1   | 4824   | ENSG00000167034 | validated |
| tarbase | hsa-miR-15b-5p  | NKX3-1   | 4824   | ENSG00000167034 | validated |
| tarbase | hsa-miR-106b-5p | PBX3     | 5090   | ENSG00000167081 | validated |
| tarbase | hsa-miR-15b-5p  | PBX3     | 5090   | ENSG00000167081 | validated |
| tarbase | hsa-miR-212-3p  | PHB      | 5245   | ENSG00000167085 | validated |
| tarbase | hsa-miR-21-5p   | SNRPD1   | 6632   | ENSG00000167088 | validated |
| tarbase | hsa-miR-222-3p  | SNRPD1   | 6632   | ENSG00000167088 | validated |
| tarbase | hsa-miR-301a-3p | SNRPD1   | 6632   | ENSG00000167088 | validated |
| tarbase | hsa-miR-181a-5p | FAM102A  | 399665 | ENSG00000167106 | validated |
| tarbase | hsa-miR-301a-3p | FAM102A  | 399665 | ENSG00000167106 | validated |
| tarbase | hsa-miR-582-3p  | FAM102A  | 399665 | ENSG00000167106 | validated |
| tarbase | hsa-miR-181a-5p | URM1     | 81605  | ENSG00000167118 | validated |
| tarbase | hsa-miR-15b-5p  | CERCAM   | 51148  | ENSG00000167123 | validated |
| tarbase | hsa-miR-301a-3p | C15orf39 | 56905  | ENSG00000167173 | validated |
| tarbase | hsa-miR-222-3p  | SP2      | 6668   | ENSG00000167182 | validated |
| tarbase | hsa-miR-15b-5p  | PRR15L   | 79170  | ENSG00000167183 | validated |
| tarbase | hsa-miR-212-3p  | CRK      | 1398   | ENSG00000167193 | validated |
| tarbase | hsa-miR-505-3p  | CRK      | 1398   | ENSG00000167193 | validated |
| tarbase | hsa-miR-106b-5p | TBC1D2B  | 23102  | ENSG00000167202 | validated |
| tarbase | hsa-miR-296-5p  | TBC1D2B  | 23102  | ENSG00000167202 | validated |
| tarbase | hsa-miR-212-3p  | LOXHD1   | 125336 | ENSG00000167210 | validated |
| tarbase | hsa-miR-15b-5p  | HDHD2    | 84064  | ENSG00000167220 | validated |
| tarbase | hsa-miR-181a-5p | ZNF91    | 7644   | ENSG00000167232 | validated |
| tarbase | hsa-miR-18a-5p  | ZNF91    | 7644   | ENSG00000167232 | validated |
| tarbase | hsa-miR-222-3p  | ZNF91    | 7644   | ENSG00000167232 | validated |
| tarbase | hsa-miR-144-3p  | IGF2     | 3481   | ENSG00000167244 | validated |
| tarbase | hsa-miR-15b-5p  | CDK12    | 51755  | ENSG00000167258 | validated |
| tarbase | hsa-miR-18a-5p  | CDK12    | 51755  | ENSG00000167258 | validated |
| tarbase | hsa-miR-192-5p  | CDK12    | 51755  | ENSG00000167258 | validated |
| tarbase | hsa-miR-212-3p  | CDK12    | 51755  | ENSG00000167258 | validated |
| tarbase | hsa-miR-582-3p  | CDK12    | 51755  | ENSG00000167258 | validated |
| tarbase | hsa-miR-21-5p   | DUS2     | 54920  | ENSG00000167264 | validated |
| tarbase | hsa-miR-106b-5p | MYO5B    | 4645   | ENSG00000167306 | validated |
| tarbase | hsa-miR-15b-5p  | MYO5B    | 4645   | ENSG00000167306 | validated |
| tarbase | hsa-miR-18a-5p  | RRM1     | 6240   | ENSG00000167325 | validated |
| tarbase | hsa-miR-212-3p  | MMP26    | 56547  | ENSG00000167346 | validated |
| tarbase | hsa-miR-15b-5p  | FN3K     | 64122  | ENSG00000167363 | validated |
| tarbase | hsa-miR-212-3p  | ZNF23    | 7571   | ENSG00000167377 | validated |
| tarbase | hsa-miR-15b-5p  | IRGQ     | 126298 | ENSG00000167378 | validated |
| tarbase | hsa-miR-192-5p  | IRGQ     | 126298 | ENSG00000167378 | validated |
| tarbase | hsa-miR-222-3p  | IRGQ     | 126298 | ENSG00000167378 | validated |
| tarbase | hsa-miR-222-3p  | ZNF226   | 7769   | ENSG00000167380 | validated |
| tarbase | hsa-miR-181a-5p | ZNF180   | 7733   | ENSG00000167384 | validated |
| tarbase | hsa-miR-18a-5p  | ZNF180   | 7733   | ENSG00000167384 | validated |
| tarbase | hsa-miR-301a-3p | ZNF180   | 7733   | ENSG00000167384 | validated |

|         |                 |          |        |                 |           |
|---------|-----------------|----------|--------|-----------------|-----------|
| tarbase | hsa-miR-296-5p  | ZNF646   | 9726   | ENSG00000167395 | validated |
| tarbase | hsa-miR-212-3p  | GNG8     | 94235  | ENSG00000167414 | validated |
| tarbase | hsa-miR-21-5p   | SMG8     | 55181  | ENSG00000167447 | validated |
| tarbase | hsa-miR-192-5p  | RAB8A    | 4218   | ENSG00000167461 | validated |
| tarbase | hsa-miR-15b-5p  | MIDN     | 90007  | ENSG00000167470 | validated |
| tarbase | hsa-miR-181a-5p | MIDN     | 90007  | ENSG00000167470 | validated |
| tarbase | hsa-miR-296-5p  | MIDN     | 90007  | ENSG00000167470 | validated |
| tarbase | hsa-miR-301a-3p | MIDN     | 90007  | ENSG00000167470 | validated |
| tarbase | hsa-miR-15b-5p  | KLHL26   | 55295  | ENSG00000167487 | validated |
| tarbase | hsa-miR-296-5p  | GATAD2A  | 54815  | ENSG00000167491 | validated |
| tarbase | hsa-miR-296-5p  | CDT1     | 81620  | ENSG00000167513 | validated |
| tarbase | hsa-miR-582-3p  | CDT1     | 81620  | ENSG00000167513 | validated |
| tarbase | hsa-miR-222-3p  | CDT1     | 81620  | ENSG00000167513 | validated |
| tarbase | hsa-miR-106b-5p | ANKRD11  | 29123  | ENSG00000167522 | validated |
| tarbase | hsa-miR-296-5p  | ANKRD11  | 29123  | ENSG00000167522 | validated |
| tarbase | hsa-miR-582-3p  | ANKRD11  | 29123  | ENSG00000167522 | validated |
| tarbase | hsa-miR-296-5p  | SPATA33  | 124045 | ENSG00000167523 | validated |
| tarbase | hsa-miR-212-3p  | RSKR     | 124923 | ENSG00000167524 | validated |
| tarbase | hsa-miR-15b-5p  | DHRS13   | 147015 | ENSG00000167536 | validated |
| tarbase | hsa-miR-181a-5p | KMT2D    | 8085   | ENSG00000167548 | validated |
| tarbase | hsa-miR-21-5p   | KMT2D    | 8085   | ENSG00000167548 | validated |
| tarbase | hsa-miR-296-5p  | KMT2D    | 8085   | ENSG00000167548 | validated |
| tarbase | hsa-miR-301a-3p | KMT2D    | 8085   | ENSG00000167548 | validated |
| tarbase | hsa-miR-326     | KMT2D    | 8085   | ENSG00000167548 | validated |
| tarbase | hsa-miR-15b-5p  | TUBA1A   | 7846   | ENSG00000167552 | validated |
| tarbase | hsa-miR-15b-5p  | SERTAD3  | 29946  | ENSG00000167565 | validated |
| tarbase | hsa-miR-192-5p  | PROSER3  | 148137 | ENSG00000167595 | validated |
| tarbase | hsa-miR-18a-5p  | PROSER3  | 148137 | ENSG00000167595 | validated |
| tarbase | hsa-miR-192-5p  | AXL      | 558    | ENSG00000167601 | validated |
| tarbase | hsa-miR-21-5p   | AXL      | 558    | ENSG00000167601 | validated |
| tarbase | hsa-miR-301a-3p | AXL      | 558    | ENSG00000167601 | validated |
| tarbase | hsa-miR-15b-5p  | LENG8    | 114823 | ENSG00000167615 | validated |
| tarbase | hsa-miR-296-5p  | LENG8    | 114823 | ENSG00000167615 | validated |
| tarbase | hsa-miR-212-3p  | LAIR2    | 3904   | ENSG00000167618 | validated |
| tarbase | hsa-miR-301a-3p | ZNF526   | 116115 | ENSG00000167625 | validated |
| tarbase | hsa-miR-106b-5p | ZNF146   | 7705   | ENSG00000167635 | validated |
| tarbase | hsa-miR-15b-5p  | ZNF146   | 7705   | ENSG00000167635 | validated |
| tarbase | hsa-miR-181a-5p | ZNF146   | 7705   | ENSG00000167635 | validated |
| tarbase | hsa-miR-18a-5p  | ZNF146   | 7705   | ENSG00000167635 | validated |
| tarbase | hsa-miR-582-5p  | ZNF146   | 7705   | ENSG00000167635 | validated |
| tarbase | hsa-miR-301a-3p | DAPK3    | 1613   | ENSG00000167657 | validated |
| tarbase | hsa-miR-296-5p  | EEF2     | 1938   | ENSG00000167658 | validated |
| tarbase | hsa-miR-326     | EEF2     | 1938   | ENSG00000167658 | validated |
| tarbase | hsa-miR-582-3p  | EEF2     | 1938   | ENSG00000167658 | validated |
| tarbase | hsa-miR-212-3p  | PLIN4    | 729359 | ENSG00000167676 | validated |
| tarbase | hsa-miR-505-3p  | NXN      | 64359  | ENSG00000167693 | validated |
| tarbase | hsa-miR-296-5p  | KIFC2    | 90990  | ENSG00000167702 | validated |
| tarbase | hsa-miR-212-3p  | KIFC2    | 90990  | ENSG00000167702 | validated |
| tarbase | hsa-miR-301a-3p | WDR81    | 124997 | ENSG00000167716 | validated |
| tarbase | hsa-miR-181a-5p | TSR1     | 55720  | ENSG00000167721 | validated |
| tarbase | hsa-miR-326     | TSR1     | 55720  | ENSG00000167721 | validated |
| tarbase | hsa-miR-15b-5p  | C19orf48 | 84798  | ENSG00000167747 | validated |
| tarbase | hsa-miR-296-5p  | C19orf48 | 84798  | ENSG00000167747 | validated |
| tarbase | hsa-miR-301a-3p | C19orf48 | 84798  | ENSG00000167747 | validated |
| tarbase | hsa-miR-296-5p  | KRT80    | 144501 | ENSG00000167767 | validated |
| tarbase | hsa-miR-582-5p  | KRT80    | 144501 | ENSG00000167767 | validated |
| tarbase | hsa-miR-15b-5p  | SPRYD3   | 84926  | ENSG00000167778 | validated |
| tarbase | hsa-miR-582-3p  | SPRYD3   | 84926  | ENSG00000167778 | validated |
| tarbase | hsa-miR-212-3p  | IGFBP6   | 3489   | ENSG00000167779 | validated |
| tarbase | hsa-miR-181a-5p | ZNF232   | 7775   | ENSG00000167840 | validated |
| tarbase | hsa-miR-15b-5p  | CD300A   | 11314  | ENSG00000167851 | validated |
| tarbase | hsa-miR-15b-5p  | TMC8     | 147138 | ENSG00000167895 | validated |
| tarbase | hsa-miR-106b-5p | ABCA3    | 21     | ENSG00000167972 | validated |
| tarbase | hsa-miR-15b-5p  | SRRM2    | 23524  | ENSG00000167978 | validated |
| tarbase | hsa-miR-181a-5p | SRRM2    | 23524  | ENSG00000167978 | validated |
| tarbase | hsa-miR-192-5p  | SRRM2    | 23524  | ENSG00000167978 | validated |
| tarbase | hsa-miR-21-5p   | SRRM2    | 23524  | ENSG00000167978 | validated |
| tarbase | hsa-miR-296-5p  | SRRM2    | 23524  | ENSG00000167978 | validated |
| tarbase | hsa-miR-301a-3p | SRRM2    | 23524  | ENSG00000167978 | validated |
| tarbase | hsa-miR-326     | SRRM2    | 23524  | ENSG00000167978 | validated |
| tarbase | hsa-miR-582-5p  | SRRM2    | 23524  | ENSG00000167978 | validated |

|         |                 |           |        |                 |           |
|---------|-----------------|-----------|--------|-----------------|-----------|
| tarbase | hsa-miR-106b-5p | SDHAF2    | 54949  | ENSG00000167985 | validated |
| tarbase | hsa-miR-301a-3p | SDHAF2    | 54949  | ENSG00000167985 | validated |
| tarbase | hsa-miR-15b-5p  | DDB1      | 1642   | ENSG00000167986 | validated |
| tarbase | hsa-miR-18a-5p  | DDB1      | 1642   | ENSG00000167986 | validated |
| tarbase | hsa-miR-582-5p  | DDB1      | 1642   | ENSG00000167986 | validated |
| tarbase | hsa-miR-15b-5p  | VPS37C    | 55048  | ENSG00000167987 | validated |
| tarbase | hsa-miR-21-5p   | VWCE      | 220001 | ENSG00000167992 | validated |
| tarbase | hsa-miR-144-3p  | BEST1     | 7439   | ENSG00000167995 | validated |
| tarbase | hsa-miR-505-3p  | SLC3A2    | 6520   | ENSG00000168003 | validated |
| tarbase | hsa-miR-21-5p   | RPSA      | 3921   | ENSG00000168028 | validated |
| tarbase | hsa-miR-15b-5p  | CTNNB1    | 1499   | ENSG00000168036 | validated |
| tarbase | hsa-miR-18a-5p  | CTNNB1    | 1499   | ENSG00000168036 | validated |
| tarbase | hsa-miR-21-5p   | CTNNB1    | 1499   | ENSG00000168036 | validated |
| tarbase | hsa-miR-222-3p  | CTNNB1    | 1499   | ENSG00000168036 | validated |
| tarbase | hsa-miR-582-5p  | CTNNB1    | 1499   | ENSG00000168036 | validated |
| tarbase | hsa-miR-106b-5p | CTNNB1    | 1499   | ENSG00000168036 | validated |
| tarbase | hsa-miR-181a-5p | ULK4      | 54986  | ENSG00000168038 | validated |
| tarbase | hsa-miR-212-3p  | ULK4      | 54986  | ENSG00000168038 | validated |
| tarbase | hsa-miR-192-5p  | LTBP3     | 4054   | ENSG00000168056 | validated |
| tarbase | hsa-miR-212-3p  | LTBP3     | 4054   | ENSG00000168056 | validated |
| tarbase | hsa-miR-296-5p  | LTBP3     | 4054   | ENSG00000168056 | validated |
| tarbase | hsa-miR-326     | LTBP3     | 4054   | ENSG00000168056 | validated |
| tarbase | hsa-miR-505-3p  | SF1       | 7536   | ENSG00000168066 | validated |
| tarbase | hsa-miR-21-5p   | MAP4K2    | 5871   | ENSG00000168067 | validated |
| tarbase | hsa-miR-301a-3p | SCARA3    | 51435  | ENSG00000168077 | validated |
| tarbase | hsa-miR-21-5p   | PBK       | 55872  | ENSG00000168078 | validated |
| tarbase | hsa-miR-106b-5p | PBK       | 55872  | ENSG00000168078 | validated |
| tarbase | hsa-miR-21-5p   | COPS6     | 10980  | ENSG00000168090 | validated |
| tarbase | hsa-miR-181a-5p | PAFAH1B2  | 5049   | ENSG00000168092 | validated |
| tarbase | hsa-miR-212-3p  | NUDT16L1  | 84309  | ENSG00000168101 | validated |
| tarbase | hsa-miR-212-3p  | KIAA1586  | 57691  | ENSG00000168116 | validated |
| tarbase | hsa-miR-15b-5p  | SETD5     | 55209  | ENSG00000168137 | validated |
| tarbase | hsa-miR-181a-5p | SETD5     | 55209  | ENSG00000168137 | validated |
| tarbase | hsa-miR-18a-5p  | SETD5     | 55209  | ENSG00000168137 | validated |
| tarbase | hsa-miR-296-5p  | SETD5     | 55209  | ENSG00000168137 | validated |
| tarbase | hsa-miR-505-3p  | SETD5     | 55209  | ENSG00000168137 | validated |
| tarbase | hsa-miR-212-3p  | THAP9     | 79725  | ENSG00000168152 | validated |
| tarbase | hsa-miR-15b-5p  | RNF187    | 149603 | ENSG00000168159 | validated |
| tarbase | hsa-miR-18a-5p  | RNF187    | 149603 | ENSG00000168159 | validated |
| tarbase | hsa-miR-222-3p  | HOOK3     | 84376  | ENSG00000168172 | validated |
| tarbase | hsa-miR-106b-5p | MAPK11P1L | 93487  | ENSG00000168175 | validated |
| tarbase | hsa-miR-18a-5p  | MAPK11P1L | 93487  | ENSG00000168175 | validated |
| tarbase | hsa-miR-222-3p  | DDIT4     | 54541  | ENSG00000168209 | validated |
| tarbase | hsa-miR-106b-5p | DDIT4     | 54541  | ENSG00000168209 | validated |
| tarbase | hsa-miR-106b-5p | RBPJ      | 3516   | ENSG00000168214 | validated |
| tarbase | hsa-miR-181a-5p | RBPJ      | 3516   | ENSG00000168214 | validated |
| tarbase | hsa-miR-21-5p   | RBPJ      | 3516   | ENSG00000168214 | validated |
| tarbase | hsa-miR-582-5p  | RBPJ      | 3516   | ENSG00000168214 | validated |
| tarbase | hsa-miR-106b-5p | ZCCHC4    | 29063  | ENSG00000168228 | validated |
| tarbase | hsa-miR-15b-5p  | PTGDR     | 5729   | ENSG00000168229 | validated |
| tarbase | hsa-miR-181a-5p | GLYCTK    | 132158 | ENSG00000168237 | validated |
| tarbase | hsa-miR-222-3p  | UBTD2     | 92181  | ENSG00000168246 | validated |
| tarbase | hsa-miR-582-5p  | UBTD2     | 92181  | ENSG00000168246 | validated |
| tarbase | hsa-miR-106b-5p | UBTD2     | 92181  | ENSG00000168246 | validated |
| tarbase | hsa-miR-301a-3p | NKIRAS2   | 28511  | ENSG00000168256 | validated |
| tarbase | hsa-miR-582-5p  | NKIRAS2   | 28511  | ENSG00000168256 | validated |
| tarbase | hsa-miR-15b-5p  | IRF2BP2   | 359948 | ENSG00000168264 | validated |
| tarbase | hsa-miR-301a-3p | IRF2BP2   | 359948 | ENSG00000168264 | validated |
| tarbase | hsa-miR-326     | IRF2BP2   | 359948 | ENSG00000168264 | validated |
| tarbase | hsa-miR-582-3p  | IRF2BP2   | 359948 | ENSG00000168264 | validated |
| tarbase | hsa-miR-18a-5p  | NT5DC2    | 64943  | ENSG00000168268 | validated |
| tarbase | hsa-miR-15b-5p  | KIF5C     | 3800   | ENSG00000168280 | validated |
| tarbase | hsa-miR-21-5p   | KIF5C     | 3800   | ENSG00000168280 | validated |
| tarbase | hsa-miR-582-5p  | KIF5C     | 3800   | ENSG00000168280 | validated |
| tarbase | hsa-miR-181a-5p | KIF5C     | 3800   | ENSG00000168280 | validated |
| tarbase | hsa-miR-181a-5p | MGAT2     | 4247   | ENSG00000168282 | validated |
| tarbase | hsa-miR-181a-5p | BMI1      | 648    | ENSG00000168283 | validated |
| tarbase | hsa-miR-222-3p  | BMI1      | 648    | ENSG00000168283 | validated |
| tarbase | hsa-miR-15b-5p  | H1-4      | 3008   | ENSG00000168298 | validated |
| tarbase | hsa-miR-21-5p   | H1-4      | 3008   | ENSG00000168298 | validated |
| tarbase | hsa-miR-212-3p  | H1-4      | 3008   | ENSG00000168298 | validated |



|         |                 |          |        |                 |           |
|---------|-----------------|----------|--------|-----------------|-----------|
| tarbase | hsa-miR-326     | PCMTD1   | 115294 | ENSG00000168300 | validated |
| tarbase | hsa-miR-106b-5p | MPLKIP   | 136647 | ENSG00000168303 | validated |
| tarbase | hsa-miR-326     | FAM107A  | 11170  | ENSG00000168309 | validated |
| tarbase | hsa-miR-181a-5p | FAM107A  | 11170  | ENSG00000168309 | validated |
| tarbase | hsa-miR-15b-5p  | IRF2     | 3660   | ENSG00000168310 | validated |
| tarbase | hsa-miR-326     | IRF2     | 3660   | ENSG00000168310 | validated |
| tarbase | hsa-miR-21-5p   | ARF4     | 378    | ENSG00000168374 | validated |
| tarbase | hsa-miR-222-3p  | ARF4     | 378    | ENSG00000168374 | validated |
| tarbase | hsa-miR-301a-3p | ARF4     | 378    | ENSG00000168374 | validated |
| tarbase | hsa-miR-144-3p  | SEPTIN2  | 4735   | ENSG00000168385 | validated |
| tarbase | hsa-miR-192-5p  | SEPTIN2  | 4735   | ENSG00000168385 | validated |
| tarbase | hsa-miR-301a-3p | SEPTIN2  | 4735   | ENSG00000168385 | validated |
| tarbase | hsa-miR-18a-5p  | SEPTIN2  | 4735   | ENSG00000168385 | validated |
| tarbase | hsa-miR-212-3p  | TAP1     | 6890   | ENSG00000168394 | validated |
| tarbase | hsa-miR-301a-3p | ATG4B    | 23192  | ENSG00000168397 | validated |
| tarbase | hsa-miR-15b-5p  | BDKRB2   | 624    | ENSG00000168398 | validated |
| tarbase | hsa-miR-15b-5p  | RFWD3    | 55159  | ENSG00000168411 | validated |
| tarbase | hsa-miR-106b-5p | CDC40    | 51362  | ENSG00000168438 | validated |
| tarbase | hsa-miR-15b-5p  | STIP1    | 10963  | ENSG00000168439 | validated |
| tarbase | hsa-miR-212-3p  | STIP1    | 10963  | ENSG00000168439 | validated |
| tarbase | hsa-miR-192-5p  | REEP4    | 80346  | ENSG00000168476 | validated |
| tarbase | hsa-miR-18a-5p  | ATXN2L   | 11273  | ENSG00000168488 | validated |
| tarbase | hsa-miR-21-5p   | ATXN2L   | 11273  | ENSG00000168488 | validated |
| tarbase | hsa-miR-296-5p  | ATXN2L   | 11273  | ENSG00000168488 | validated |
| tarbase | hsa-miR-301a-3p | MTCL1    | 23255  | ENSG00000168502 | validated |
| tarbase | hsa-miR-181a-5p | CDKN2AIP | 55602  | ENSG00000168564 | validated |
| tarbase | hsa-miR-222-3p  | CDKN2AIP | 55602  | ENSG00000168564 | validated |
| tarbase | hsa-miR-212-3p  | CDKN2AIP | 55602  | ENSG00000168564 | validated |
| tarbase | hsa-miR-15b-5p  | SNRNP48  | 154007 | ENSG00000168566 | validated |
| tarbase | hsa-miR-15b-5p  | SLC20A2  | 6575   | ENSG00000168575 | validated |
| tarbase | hsa-miR-181a-5p | SLC20A2  | 6575   | ENSG00000168575 | validated |
| tarbase | hsa-miR-18a-5p  | SLC20A2  | 6575   | ENSG00000168575 | validated |
| tarbase | hsa-miR-212-3p  | DYNLRB2  | 83657  | ENSG00000168589 | validated |
| tarbase | hsa-miR-15b-5p  | STAT3    | 6774   | ENSG00000168610 | validated |
| tarbase | hsa-miR-18a-5p  | STAT3    | 6774   | ENSG00000168610 | validated |
| tarbase | hsa-miR-301a-3p | STAT3    | 6774   | ENSG00000168610 | validated |
| tarbase | hsa-miR-15b-5p  | ZSWIM1   | 90204  | ENSG00000168612 | validated |
| tarbase | hsa-miR-106b-5p | ADAM9    | 8754   | ENSG00000168615 | validated |
| tarbase | hsa-miR-18a-5p  | ADAM9    | 8754   | ENSG00000168615 | validated |
| tarbase | hsa-miR-21-5p   | ADAM9    | 8754   | ENSG00000168615 | validated |
| tarbase | hsa-miR-18a-5p  | AXIN2    | 8313   | ENSG00000168646 | validated |
| tarbase | hsa-miR-181a-5p | NDUFS5   | 4725   | ENSG00000168653 | validated |
| tarbase | hsa-miR-21-5p   | NDUFS5   | 4725   | ENSG00000168653 | validated |
| tarbase | hsa-miR-181a-5p | ZNF30    | 90075  | ENSG00000168661 | validated |
| tarbase | hsa-miR-212-3p  | LRATD2   | 157638 | ENSG00000168672 | validated |
| tarbase | hsa-miR-301a-3p | LRATD2   | 157638 | ENSG00000168672 | validated |
| tarbase | hsa-miR-505-3p  | LRATD2   | 157638 | ENSG00000168672 | validated |
| tarbase | hsa-miR-15b-5p  | SEMA4C   | 54910  | ENSG00000168758 | validated |
| tarbase | hsa-miR-106b-5p | TET2     | 54790  | ENSG00000168769 | validated |
| tarbase | hsa-miR-222-3p  | TET2     | 54790  | ENSG00000168769 | validated |
| tarbase | hsa-miR-301a-3p | TET2     | 54790  | ENSG00000168769 | validated |
| tarbase | hsa-miR-212-3p  | TET2     | 54790  | ENSG00000168769 | validated |
| tarbase | hsa-miR-212-3p  | CXXC4    | 80319  | ENSG00000168772 | validated |
| tarbase | hsa-miR-181a-5p | TSPAN5   | 10098  | ENSG00000168785 | validated |
| tarbase | hsa-miR-296-5p  | ABHD15   | 116236 | ENSG00000168792 | validated |
| tarbase | hsa-miR-326     | ZBTB5    | 9925   | ENSG00000168795 | validated |
| tarbase | hsa-miR-144-3p  | SNTB2    | 6645   | ENSG00000168807 | validated |
| tarbase | hsa-miR-21-5p   | SNTB2    | 6645   | ENSG00000168807 | validated |
| tarbase | hsa-miR-582-5p  | SNTB2    | 6645   | ENSG00000168807 | validated |
| tarbase | hsa-miR-144-3p  | ZNF507   | 22847  | ENSG00000168813 | validated |
| tarbase | hsa-miR-582-5p  | ZNF507   | 22847  | ENSG00000168813 | validated |
| tarbase | hsa-miR-106b-5p | NSG1     | 27065  | ENSG00000168824 | validated |
| tarbase | hsa-miR-181a-5p | NSG1     | 27065  | ENSG00000168824 | validated |
| tarbase | hsa-miR-181a-5p | GFM1     | 85476  | ENSG00000168827 | validated |
| tarbase | hsa-miR-301a-3p | FSTL5    | 56884  | ENSG00000168843 | validated |
| tarbase | hsa-miR-21-5p   | ANKRD49  | 54851  | ENSG00000168876 | validated |
| tarbase | hsa-miR-106b-5p | TNIP2    | 79155  | ENSG00000168884 | validated |
| tarbase | hsa-miR-18a-5p  | TNIP2    | 79155  | ENSG00000168884 | validated |
| tarbase | hsa-miR-15b-5p  | MAT2A    | 4144   | ENSG00000168906 | validated |
| tarbase | hsa-miR-181a-5p | MAT2A    | 4144   | ENSG00000168906 | validated |
| tarbase | hsa-miR-505-3p  | MAT2A    | 4144   | ENSG00000168906 | validated |

|         |                 |               |        |                 |           |
|---------|-----------------|---------------|--------|-----------------|-----------|
| tarbase | hsa-miR-582-3p  | MAT2A         | 4144   | ENSG00000168906 | validated |
| tarbase | hsa-miR-181a-5p | LETM1         | 3954   | ENSG00000168924 | validated |
| tarbase | hsa-miR-326     | TMEM129       | 92305  | ENSG00000168936 | validated |
| tarbase | hsa-miR-106b-5p | CEP120        | 153241 | ENSG00000168944 | validated |
| tarbase | hsa-miR-181a-5p | CEP120        | 153241 | ENSG00000168944 | validated |
| tarbase | hsa-miR-301a-3p | CEP120        | 153241 | ENSG00000168944 | validated |
| tarbase | hsa-miR-296-5p  | JMJD7-PLA2G4B | 8681   | ENSG00000168970 | validated |
| tarbase | hsa-miR-212-3p  | CPLX1         | 10815  | ENSG00000168993 | validated |
| tarbase | hsa-miR-15b-5p  | FEM1B         | 10116  | ENSG00000169018 | validated |
| tarbase | hsa-miR-181a-5p | FEM1B         | 10116  | ENSG00000169018 | validated |
| tarbase | hsa-miR-301a-3p | FEM1B         | 10116  | ENSG00000169018 | validated |
| tarbase | hsa-miR-582-3p  | FEM1B         | 10116  | ENSG00000169018 | validated |
| tarbase | hsa-miR-212-3p  | FEM1B         | 10116  | ENSG00000169018 | validated |
| tarbase | hsa-miR-15b-5p  | MAP2K1        | 5604   | ENSG00000169032 | validated |
| tarbase | hsa-miR-106b-5p | IRS1          | 3667   | ENSG00000169047 | validated |
| tarbase | hsa-miR-301a-3p | MECP2         | 4204   | ENSG00000169057 | validated |
| tarbase | hsa-miR-212-3p  | VXN           | 254778 | ENSG00000169085 | validated |
| tarbase | hsa-miR-15b-5p  | HSPBAP1       | 79663  | ENSG00000169087 | validated |
| tarbase | hsa-miR-212-3p  | HSPBAP1       | 79663  | ENSG00000169087 | validated |
| tarbase | hsa-miR-296-5p  | SLC25A6       | 293    | ENSG00000169100 | validated |
| tarbase | hsa-miR-301a-3p | CSNK1G1       | 53944  | ENSG00000169118 | validated |
| tarbase | hsa-miR-505-3p  | CSNK1G1       | 53944  | ENSG00000169118 | validated |
| tarbase | hsa-miR-181a-5p | CSNK1G1       | 53944  | ENSG00000169118 | validated |
| tarbase | hsa-miR-15b-5p  | FAM110B       | 90362  | ENSG00000169122 | validated |
| tarbase | hsa-miR-212-3p  | UBE2V2        | 7336   | ENSG00000169139 | validated |
| tarbase | hsa-miR-106b-5p | ZBTB43        | 23099  | ENSG00000169155 | validated |
| tarbase | hsa-miR-21-5p   | ZBTB43        | 23099  | ENSG00000169155 | validated |
| tarbase | hsa-miR-15b-5p  | PCSK9         | 255738 | ENSG00000169174 | validated |
| tarbase | hsa-miR-15b-5p  | XPO6          | 23214  | ENSG00000169180 | validated |
| tarbase | hsa-miR-181a-5p | XPO6          | 23214  | ENSG00000169180 | validated |
| tarbase | hsa-miR-181a-5p | APEX2         | 27301  | ENSG00000169188 | validated |
| tarbase | hsa-miR-212-3p  | APEX2         | 27301  | ENSG00000169188 | validated |
| tarbase | hsa-miR-301a-3p | CCDC126       | 90693  | ENSG00000169193 | validated |
| tarbase | hsa-miR-301a-3p | TBC1D10B      | 26000  | ENSG00000169221 | validated |
| tarbase | hsa-miR-181a-5p | PRELID1       | 27166  | ENSG00000169230 | validated |
| tarbase | hsa-miR-222-3p  | PRELID1       | 27166  | ENSG00000169230 | validated |
| tarbase | hsa-miR-212-3p  | THBS3         | 7059   | ENSG00000169231 | validated |
| tarbase | hsa-miR-21-5p   | CA5B          | 11238  | ENSG00000169239 | validated |
| tarbase | hsa-miR-15b-5p  | EFNA1         | 1942   | ENSG00000169242 | validated |
| tarbase | hsa-miR-212-3p  | CXCL10        | 3627   | ENSG00000169245 | validated |
| tarbase | hsa-miR-212-3p  | CXCL11        | 6373   | ENSG00000169248 | validated |
| tarbase | hsa-miR-106b-5p | NMD3          | 51068  | ENSG00000169251 | validated |
| tarbase | hsa-miR-212-3p  | GPRIN1        | 114787 | ENSG00000169258 | validated |
| tarbase | hsa-miR-212-3p  | HSPB3         | 8988   | ENSG00000169271 | validated |
| tarbase | hsa-miR-15b-5p  | MRPL1         | 65008  | ENSG00000169288 | validated |
| tarbase | hsa-miR-181a-5p | SIN3A         | 25942  | ENSG00000169375 | validated |
| tarbase | hsa-miR-212-3p  | ARL13B        | 200894 | ENSG00000169379 | validated |
| tarbase | hsa-miR-106b-5p | PTK2          | 5747   | ENSG00000169398 | validated |
| tarbase | hsa-miR-181a-5p | PTK2          | 5747   | ENSG00000169398 | validated |
| tarbase | hsa-miR-106b-5p | CXCL8         | 3576   | ENSG00000169429 | validated |
| tarbase | hsa-miR-21-5p   | CXCL8         | 3576   | ENSG00000169429 | validated |
| tarbase | hsa-miR-212-3p  | CXCL8         | 3576   | ENSG00000169429 | validated |
| tarbase | hsa-miR-21-5p   | SDC2          | 6383   | ENSG00000169439 | validated |
| tarbase | hsa-miR-222-3p  | SDC2          | 6383   | ENSG00000169439 | validated |
| tarbase | hsa-miR-15b-5p  | SDC2          | 6383   | ENSG00000169439 | validated |
| tarbase | hsa-miR-181a-5p | SDC2          | 6383   | ENSG00000169439 | validated |
| tarbase | hsa-miR-222-3p  | MMGT1         | 93380  | ENSG00000169446 | validated |
| tarbase | hsa-miR-582-5p  | MMGT1         | 93380  | ENSG00000169446 | validated |
| tarbase | hsa-miR-106b-5p | MMGT1         | 93380  | ENSG00000169446 | validated |
| tarbase | hsa-miR-181a-5p | MMGT1         | 93380  | ENSG00000169446 | validated |
| tarbase | hsa-miR-222-3p  | SPRR1B        | 6699   | ENSG00000169469 | validated |
| tarbase | hsa-miR-18a-5p  | CLIC4         | 25932  | ENSG00000169504 | validated |
| tarbase | hsa-miR-222-3p  | CLIC4         | 25932  | ENSG00000169504 | validated |
| tarbase | hsa-miR-181a-5p | GPR183        | 1880   | ENSG00000169508 | validated |
| tarbase | hsa-miR-192-5p  | ZEB2          | 9839   | ENSG00000169554 | validated |
| tarbase | hsa-miR-582-3p  | ZEB2          | 9839   | ENSG00000169554 | validated |
| tarbase | hsa-miR-212-3p  | GJB1          | 2705   | ENSG00000169562 | validated |
| tarbase | hsa-miR-181a-5p | PCBP1         | 5093   | ENSG00000169564 | validated |
| tarbase | hsa-miR-15b-5p  | HINT1         | 3094   | ENSG00000169567 | validated |
| tarbase | hsa-miR-296-5p  | INO80E        | 283899 | ENSG00000169592 | validated |
| tarbase | hsa-miR-18a-5p  | BNC1          | 646    | ENSG00000169594 | validated |

|         |                 |          |        |                 |           |
|---------|-----------------|----------|--------|-----------------|-----------|
| tarbase | hsa-miR-106b-5p | DFFB     | 1677   | ENSG00000169598 | validated |
| tarbase | hsa-miR-21-5p   | ANTXR1   | 84168  | ENSG00000169604 | validated |
| tarbase | hsa-miR-582-5p  | CKAP2L   | 150468 | ENSG00000169607 | validated |
| tarbase | hsa-miR-212-3p  | CKAP2L   | 150468 | ENSG00000169607 | validated |
| tarbase | hsa-miR-222-3p  | CKAP2L   | 150468 | ENSG00000169607 | validated |
| tarbase | hsa-miR-192-5p  | C15orf40 | 123207 | ENSG00000169609 | validated |
| tarbase | hsa-miR-326     | RGPD8    | 727851 | ENSG00000169629 | validated |
| tarbase | hsa-miR-192-5p  | HIC2     | 23119  | ENSG00000169635 | validated |
| tarbase | hsa-miR-296-5p  | HIC2     | 23119  | ENSG00000169635 | validated |
| tarbase | hsa-miR-301a-3p | HIC2     | 23119  | ENSG00000169635 | validated |
| tarbase | hsa-miR-106b-5p | LUZP1    | 7798   | ENSG00000169641 | validated |
| tarbase | hsa-miR-21-5p   | BUB1     | 699    | ENSG00000169679 | validated |
| tarbase | hsa-miR-582-5p  | BUB1     | 699    | ENSG00000169679 | validated |
| tarbase | hsa-miR-582-3p  | LRRCA5   | 201255 | ENSG00000169683 | validated |
| tarbase | hsa-miR-15b-5p  | CHRNA5   | 1138   | ENSG00000169684 | validated |
| tarbase | hsa-miR-212-3p  | CHRNA5   | 1138   | ENSG00000169684 | validated |
| tarbase | hsa-miR-15b-5p  | AGPAT2   | 10555  | ENSG00000169692 | validated |
| tarbase | hsa-miR-18a-5p  | ASPSCR1  | 79058  | ENSG00000169696 | validated |
| tarbase | hsa-miR-301a-3p | FASN     | 2194   | ENSG00000169710 | validated |
| tarbase | hsa-miR-15b-5p  | CNBP     | 7555   | ENSG00000169714 | validated |
| tarbase | hsa-miR-212-3p  | CNBP     | 7555   | ENSG00000169714 | validated |
| tarbase | hsa-miR-15b-5p  | DUS1L    | 64118  | ENSG00000169718 | validated |
| tarbase | hsa-miR-301a-3p | DUS1L    | 64118  | ENSG00000169718 | validated |
| tarbase | hsa-miR-326     | DUS1L    | 64118  | ENSG00000169718 | validated |
| tarbase | hsa-miR-192-5p  | DCXR     | 51181  | ENSG00000169738 | validated |
| tarbase | hsa-miR-181a-5p | ZNF32    | 7580   | ENSG00000169740 | validated |
| tarbase | hsa-miR-582-3p  | RAC3     | 5881   | ENSG00000169750 | validated |
| tarbase | hsa-miR-21-5p   | LIMS1    | 3987   | ENSG00000169756 | validated |
| tarbase | hsa-miR-15b-5p  | TAPT1    | 202018 | ENSG00000169762 | validated |
| tarbase | hsa-miR-212-3p  | UGP2     | 7360   | ENSG00000169764 | validated |
| tarbase | hsa-miR-181a-5p | HNRNPF   | 3185   | ENSG00000169813 | validated |
| tarbase | hsa-miR-192-5p  | HNRNPF   | 3185   | ENSG00000169813 | validated |
| tarbase | hsa-miR-222-3p  | HNRNPF   | 3185   | ENSG00000169813 | validated |
| tarbase | hsa-miR-144-3p  | PCDH7    | 5099   | ENSG00000169851 | validated |
| tarbase | hsa-miR-582-5p  | PCDH7    | 5099   | ENSG00000169851 | validated |
| tarbase | hsa-miR-106b-5p | ROBO1    | 6091   | ENSG00000169855 | validated |
| tarbase | hsa-miR-181a-5p | AVEN     | 57099  | ENSG00000169857 | validated |
| tarbase | hsa-miR-181a-5p | P2RY1    | 5028   | ENSG00000169860 | validated |
| tarbase | hsa-miR-212-3p  | TRIM56   | 81844  | ENSG00000169871 | validated |
| tarbase | hsa-miR-181a-5p | REPS2    | 9185   | ENSG00000169891 | validated |
| tarbase | hsa-miR-106b-5p | SYAP1    | 94056  | ENSG00000169895 | validated |
| tarbase | hsa-miR-15b-5p  | SYAP1    | 94056  | ENSG00000169895 | validated |
| tarbase | hsa-miR-181a-5p | SYAP1    | 94056  | ENSG00000169895 | validated |
| tarbase | hsa-miR-18a-5p  | TOR1AIP2 | 163590 | ENSG00000169905 | validated |
| tarbase | hsa-miR-212-3p  | TOR1AIP2 | 163590 | ENSG00000169905 | validated |
| tarbase | hsa-miR-301a-3p | TOR1AIP2 | 163590 | ENSG00000169905 | validated |
| tarbase | hsa-miR-181a-5p | TM4SF1   | 4071   | ENSG00000169908 | validated |
| tarbase | hsa-miR-106b-5p | OTUD3    | 23252  | ENSG00000169914 | validated |
| tarbase | hsa-miR-15b-5p  | OTUD3    | 23252  | ENSG00000169914 | validated |
| tarbase | hsa-miR-582-3p  | OTUD3    | 23252  | ENSG00000169914 | validated |
| tarbase | hsa-miR-15b-5p  | GUSB     | 2990   | ENSG00000169919 | validated |
| tarbase | hsa-miR-212-3p  | GUSB     | 2990   | ENSG00000169919 | validated |
| tarbase | hsa-miR-15b-5p  | BRD3     | 8019   | ENSG00000169925 | validated |
| tarbase | hsa-miR-301a-3p | KLF13    | 51621  | ENSG00000169926 | validated |
| tarbase | hsa-miR-106b-5p | FRMPD4   | 9758   | ENSG00000169933 | validated |
| tarbase | hsa-miR-296-5p  | ZNF768   | 79724  | ENSG00000169957 | validated |
| tarbase | hsa-miR-181a-5p | MAP3K2   | 10746  | ENSG00000169967 | validated |
| tarbase | hsa-miR-18a-5p  | MAP3K2   | 10746  | ENSG00000169967 | validated |
| tarbase | hsa-miR-212-3p  | MAP3K2   | 10746  | ENSG00000169967 | validated |
| tarbase | hsa-miR-192-5p  | ZNF35    | 7584   | ENSG00000169981 | validated |
| tarbase | hsa-miR-326     | ZNF35    | 7584   | ENSG00000169981 | validated |
| tarbase | hsa-miR-212-3p  | TIGD4    | 201798 | ENSG00000169989 | validated |
| tarbase | hsa-miR-181a-5p | IFFO2    | 126917 | ENSG00000169991 | validated |
| tarbase | hsa-miR-582-5p  | IFFO2    | 126917 | ENSG00000169991 | validated |
| tarbase | hsa-miR-212-3p  | IFFO2    | 126917 | ENSG00000169991 | validated |
| tarbase | hsa-miR-15b-5p  | NLGN2    | 57555  | ENSG00000169992 | validated |
| tarbase | hsa-miR-296-5p  | NLGN2    | 57555  | ENSG00000169992 | validated |
| tarbase | hsa-miR-15b-5p  | CHD3     | 1107   | ENSG00000170004 | validated |
| tarbase | hsa-miR-212-3p  | TMEM154  | 201799 | ENSG00000170006 | validated |
| tarbase | hsa-miR-15b-5p  | ALCAM    | 214    | ENSG00000170017 | validated |
| tarbase | hsa-miR-18a-5p  | ALCAM    | 214    | ENSG00000170017 | validated |

|         |                 |          |        |                 |           |
|---------|-----------------|----------|--------|-----------------|-----------|
| tarbase | hsa-miR-505-3p  | ALCAM    | 214    | ENSG00000170017 | validated |
| tarbase | hsa-miR-106b-5p | ALCAM    | 214    | ENSG00000170017 | validated |
| tarbase | hsa-miR-15b-5p  | YWHAG    | 7532   | ENSG00000170027 | validated |
| tarbase | hsa-miR-181a-5p | YWHAG    | 7532   | ENSG00000170027 | validated |
| tarbase | hsa-miR-212-3p  | YWHAG    | 7532   | ENSG00000170027 | validated |
| tarbase | hsa-miR-582-3p  | YWHAG    | 7532   | ENSG00000170027 | validated |
| tarbase | hsa-miR-296-5p  | TRAPPC1  | 58485  | ENSG00000170043 | validated |
| tarbase | hsa-miR-222-3p  | KCNAB3   | 9196   | ENSG00000170049 | validated |
| tarbase | hsa-miR-212-3p  | SERPINA9 | 327657 | ENSG00000170054 | validated |
| tarbase | hsa-miR-106b-5p | TMEM192  | 201931 | ENSG00000170088 | validated |
| tarbase | hsa-miR-18a-5p  | ZNF778   | 197320 | ENSG00000170100 | validated |
| tarbase | hsa-miR-181a-5p | NIPA1    | 123606 | ENSG00000170113 | validated |
| tarbase | hsa-miR-15b-5p  | GPR25    | 2848   | ENSG00000170128 | validated |
| tarbase | hsa-miR-106b-5p | UBE2E1   | 7324   | ENSG00000170142 | validated |
| tarbase | hsa-miR-582-5p  | UBE2E1   | 7324   | ENSG00000170142 | validated |
| tarbase | hsa-miR-106b-5p | HNRNPA3  | 220988 | ENSG00000170144 | validated |
| tarbase | hsa-miR-21-5p   | HNRNPA3  | 220988 | ENSG00000170144 | validated |
| tarbase | hsa-miR-106b-5p | RNF150   | 57484  | ENSG00000170153 | validated |
| tarbase | hsa-miR-181a-5p | RNF150   | 57484  | ENSG00000170153 | validated |
| tarbase | hsa-miR-15b-5p  | USP38    | 84640  | ENSG00000170185 | validated |
| tarbase | hsa-miR-181a-5p | USP38    | 84640  | ENSG00000170185 | validated |
| tarbase | hsa-miR-212-3p  | USP38    | 84640  | ENSG00000170185 | validated |
| tarbase | hsa-miR-192-5p  | PWWP2A   | 114825 | ENSG00000170234 | validated |
| tarbase | hsa-miR-144-3p  | USP47    | 55031  | ENSG00000170242 | validated |
| tarbase | hsa-miR-582-5p  | USP47    | 55031  | ENSG00000170242 | validated |
| tarbase | hsa-miR-301a-3p | FAM161A  | 84140  | ENSG00000170264 | validated |
| tarbase | hsa-miR-15b-5p  | ELP5     | 23587  | ENSG00000170291 | validated |
| tarbase | hsa-miR-192-5p  | CDK1     | 983    | ENSG00000170312 | validated |
| tarbase | hsa-miR-222-3p  | CDK1     | 983    | ENSG00000170312 | validated |
| tarbase | hsa-miR-582-5p  | CDK1     | 983    | ENSG00000170312 | validated |
| tarbase | hsa-miR-212-3p  | UBB      | 7314   | ENSG00000170315 | validated |
| tarbase | hsa-miR-18a-5p  | UBB      | 7314   | ENSG00000170315 | validated |
| tarbase | hsa-miR-192-5p  | UBB      | 7314   | ENSG00000170315 | validated |
| tarbase | hsa-miR-181a-5p | B3GNT2   | 10678  | ENSG00000170340 | validated |
| tarbase | hsa-miR-212-3p  | FOS      | 2353   | ENSG00000170345 | validated |
| tarbase | hsa-miR-15b-5p  | TMED10   | 10972  | ENSG00000170348 | validated |
| tarbase | hsa-miR-181a-5p | TMED10   | 10972  | ENSG00000170348 | validated |
| tarbase | hsa-miR-21-5p   | TMED10   | 10972  | ENSG00000170348 | validated |
| tarbase | hsa-miR-296-5p  | TMED10   | 10972  | ENSG00000170348 | validated |
| tarbase | hsa-miR-582-3p  | TMED10   | 10972  | ENSG00000170348 | validated |
| tarbase | hsa-miR-181a-5p | SMAD1    | 4086   | ENSG00000170365 | validated |
| tarbase | hsa-miR-212-3p  | EMX2     | 2018   | ENSG00000170370 | validated |
| tarbase | hsa-miR-144-3p  | SLC30A1  | 7779   | ENSG00000170385 | validated |
| tarbase | hsa-miR-18a-5p  | SLC30A1  | 7779   | ENSG00000170385 | validated |
| tarbase | hsa-miR-222-3p  | SLC30A1  | 7779   | ENSG00000170385 | validated |
| tarbase | hsa-miR-505-3p  | SLC30A1  | 7779   | ENSG00000170385 | validated |
| tarbase | hsa-miR-212-3p  | ZNF804A  | 91752  | ENSG00000170396 | validated |
| tarbase | hsa-miR-212-3p  | KRT8     | 3856   | ENSG00000170421 | validated |
| tarbase | hsa-miR-15b-5p  | ADORA2B  | 136    | ENSG00000170425 | validated |
| tarbase | hsa-miR-21-5p   | METTL7B  | 196410 | ENSG00000170439 | validated |
| tarbase | hsa-miR-181a-5p | DENND5B  | 160518 | ENSG00000170456 | validated |
| tarbase | hsa-miR-212-3p  | DENND5B  | 160518 | ENSG00000170456 | validated |
| tarbase | hsa-miR-181a-5p | RIOX1    | 79697  | ENSG00000170468 | validated |
| tarbase | hsa-miR-181a-5p | RALGAPB  | 57148  | ENSG00000170471 | validated |
| tarbase | hsa-miR-212-3p  | RALGAPB  | 57148  | ENSG00000170471 | validated |
| tarbase | hsa-miR-301a-3p | RALGAPB  | 57148  | ENSG00000170471 | validated |
| tarbase | hsa-miR-15b-5p  | PYM1     | 84305  | ENSG00000170473 | validated |
| tarbase | hsa-miR-212-3p  | MZB1     | 51237  | ENSG00000170476 | validated |
| tarbase | hsa-miR-181a-5p | LONRF2   | 164832 | ENSG00000170500 | validated |
| tarbase | hsa-miR-296-5p  | LONRF2   | 164832 | ENSG00000170500 | validated |
| tarbase | hsa-miR-326     | LONRF2   | 164832 | ENSG00000170500 | validated |
| tarbase | hsa-miR-582-5p  | LONRF2   | 164832 | ENSG00000170500 | validated |
| tarbase | hsa-miR-181a-5p | ELOVL6   | 79071  | ENSG00000170522 | validated |
| tarbase | hsa-miR-106b-5p | PFKFB3   | 5209   | ENSG00000170525 | validated |
| tarbase | hsa-miR-301a-3p | PFKFB3   | 5209   | ENSG00000170525 | validated |
| tarbase | hsa-miR-15b-5p  | ARL6IP1  | 23204  | ENSG00000170540 | validated |
| tarbase | hsa-miR-181a-5p | ARL6IP1  | 23204  | ENSG00000170540 | validated |
| tarbase | hsa-miR-18a-5p  | ARL6IP1  | 23204  | ENSG00000170540 | validated |
| tarbase | hsa-miR-582-5p  | ARL6IP1  | 23204  | ENSG00000170540 | validated |
| tarbase | hsa-miR-15b-5p  | SERPINB9 | 5272   | ENSG00000170542 | validated |
| tarbase | hsa-miR-222-3p  | CDH2     | 1000   | ENSG00000170558 | validated |

|         |                 |          |        |                 |           |
|---------|-----------------|----------|--------|-----------------|-----------|
| tarbase | hsa-miR-582-3p  | CDH2     | 1000   | ENSG00000170558 | validated |
| tarbase | hsa-miR-582-5p  | CDH2     | 1000   | ENSG00000170558 | validated |
| tarbase | hsa-miR-15b-5p  | EMB      | 133418 | ENSG00000170571 | validated |
| tarbase | hsa-miR-181a-5p | DLGAP1   | 9229   | ENSG00000170579 | validated |
| tarbase | hsa-miR-15b-5p  | IRF2BP1  | 26145  | ENSG00000170604 | validated |
| tarbase | hsa-miR-21-5p   | HSPA4    | 3308   | ENSG00000170606 | validated |
| tarbase | hsa-miR-212-3p  | FAM71B   | 153745 | ENSG00000170613 | validated |
| tarbase | hsa-miR-21-5p   | GTSF1    | 121355 | ENSG00000170627 | validated |
| tarbase | hsa-miR-181a-5p | ARMC10   | 83787  | ENSG00000170632 | validated |
| tarbase | hsa-miR-301a-3p | RNF34    | 80196  | ENSG00000170633 | validated |
| tarbase | hsa-miR-505-3p  | RNF34    | 80196  | ENSG00000170633 | validated |
| tarbase | hsa-miR-15b-5p  | ATF7     | 11016  | ENSG00000170653 | validated |
| tarbase | hsa-miR-301a-3p | ATF7     | 11016  | ENSG00000170653 | validated |
| tarbase | hsa-miR-15b-5p  | SOCS6    | 9306   | ENSG00000170677 | validated |
| tarbase | hsa-miR-18a-5p  | SOCS6    | 9306   | ENSG00000170677 | validated |
| tarbase | hsa-miR-192-5p  | SOCS6    | 9306   | ENSG00000170677 | validated |
| tarbase | hsa-miR-301a-3p | SOCS6    | 9306   | ENSG00000170677 | validated |
| tarbase | hsa-miR-582-5p  | SOCS6    | 9306   | ENSG00000170677 | validated |
| tarbase | hsa-miR-18a-5p  | HOXB9    | 3219   | ENSG00000170689 | validated |
| tarbase | hsa-miR-582-5p  | POLH     | 5429   | ENSG00000170734 | validated |
| tarbase | hsa-miR-106b-5p | KIF5B    | 3799   | ENSG00000170759 | validated |
| tarbase | hsa-miR-144-3p  | KIF5B    | 3799   | ENSG00000170759 | validated |
| tarbase | hsa-miR-21-5p   | KIF5B    | 3799   | ENSG00000170759 | validated |
| tarbase | hsa-miR-582-3p  | KIF5B    | 3799   | ENSG00000170759 | validated |
| tarbase | hsa-miR-18a-5p  | KIF5B    | 3799   | ENSG00000170759 | validated |
| tarbase | hsa-miR-106b-5p | CDCA4    | 55038  | ENSG00000170779 | validated |
| tarbase | hsa-miR-181a-5p | CDCA4    | 55038  | ENSG00000170779 | validated |
| tarbase | hsa-miR-18a-5p  | CDCA4    | 55038  | ENSG00000170779 | validated |
| tarbase | hsa-miR-505-3p  | CDCA4    | 55038  | ENSG00000170779 | validated |
| tarbase | hsa-miR-18a-5p  | FOXN2    | 3344   | ENSG00000170802 | validated |
| tarbase | hsa-miR-222-3p  | FOXN2    | 3344   | ENSG00000170802 | validated |
| tarbase | hsa-miR-301a-3p | FOXN2    | 3344   | ENSG00000170802 | validated |
| tarbase | hsa-miR-582-5p  | FOXN2    | 3344   | ENSG00000170802 | validated |
| tarbase | hsa-miR-212-3p  | CEL      | 1056   | ENSG00000170835 | validated |
| tarbase | hsa-miR-18a-5p  | PPM1D    | 8493   | ENSG00000170836 | validated |
| tarbase | hsa-miR-21-5p   | PPM1D    | 8493   | ENSG00000170836 | validated |
| tarbase | hsa-miR-15b-5p  | KBTBD2   | 25948  | ENSG00000170852 | validated |
| tarbase | hsa-miR-181a-5p | KBTBD2   | 25948  | ENSG00000170852 | validated |
| tarbase | hsa-miR-106b-5p | KBTBD2   | 25948  | ENSG00000170852 | validated |
| tarbase | hsa-miR-21-5p   | TRIAP1   | 51499  | ENSG00000170855 | validated |
| tarbase | hsa-miR-582-5p  | TRIAP1   | 51499  | ENSG00000170855 | validated |
| tarbase | hsa-miR-15b-5p  | TRIAP1   | 51499  | ENSG00000170855 | validated |
| tarbase | hsa-miR-21-5p   | LSM3     | 27258  | ENSG00000170860 | validated |
| tarbase | hsa-miR-15b-5p  | KIAA0232 | 9778   | ENSG00000170871 | validated |
| tarbase | hsa-miR-326     | RNF139   | 11236  | ENSG00000170881 | validated |
| tarbase | hsa-miR-582-5p  | RNF139   | 11236  | ENSG00000170881 | validated |
| tarbase | hsa-miR-18a-5p  | RPS9     | 6203   | ENSG00000170889 | validated |
| tarbase | hsa-miR-181a-5p | MSANTD4  | 84437  | ENSG00000170903 | validated |
| tarbase | hsa-miR-15b-5p  | TANC2    | 26115  | ENSG00000170921 | validated |
| tarbase | hsa-miR-15b-5p  | DNAJC24  | 120526 | ENSG00000170946 | validated |
| tarbase | hsa-miR-18a-5p  | ZNF160   | 90338  | ENSG00000170949 | validated |
| tarbase | hsa-miR-192-5p  | ZNF160   | 90338  | ENSG00000170949 | validated |
| tarbase | hsa-miR-181a-5p | ZNF160   | 90338  | ENSG00000170949 | validated |
| tarbase | hsa-miR-181a-5p | HAS2     | 3037   | ENSG00000170961 | validated |
| tarbase | hsa-miR-222-3p  | PDGFD    | 80310  | ENSG00000170962 | validated |
| tarbase | hsa-miR-106b-5p | S1PR1    | 1901   | ENSG00000170989 | validated |
| tarbase | hsa-miR-15b-5p  | S1PR1    | 1901   | ENSG00000170989 | validated |
| tarbase | hsa-miR-181a-5p | S1PR1    | 1901   | ENSG00000170989 | validated |
| tarbase | hsa-miR-301a-3p | S1PR1    | 1901   | ENSG00000170989 | validated |
| tarbase | hsa-miR-582-5p  | HS6ST2   | 90161  | ENSG00000171004 | validated |
| tarbase | hsa-miR-18a-5p  | PYGO1    | 26108  | ENSG00000171016 | validated |
| tarbase | hsa-miR-106b-5p | PKIA     | 5569   | ENSG00000171033 | validated |
| tarbase | hsa-miR-181a-5p | PKIA     | 5569   | ENSG00000171033 | validated |
| tarbase | hsa-miR-212-3p  | PKIA     | 5569   | ENSG00000171033 | validated |
| tarbase | hsa-miR-301a-3p | FEZ2     | 9637   | ENSG00000171055 | validated |
| tarbase | hsa-miR-18a-5p  | KCNG3    | 170850 | ENSG00000171126 | validated |
| tarbase | hsa-miR-181a-5p | ATP6V0E2 | 155066 | ENSG00000171130 | validated |
| tarbase | hsa-miR-181a-5p | PRKCE    | 5581   | ENSG00000171132 | validated |
| tarbase | hsa-miR-192-5p  | JAGN1    | 84522  | ENSG00000171135 | validated |
| tarbase | hsa-miR-18a-5p  | SOCS5    | 9655   | ENSG00000171150 | validated |
| tarbase | hsa-miR-212-3p  | SOCS5    | 9655   | ENSG00000171150 | validated |

|         |                 |         |        |                 |           |
|---------|-----------------|---------|--------|-----------------|-----------|
| tarbase | hsa-miR-181a-5p | C9orf16 | 79095  | ENSG00000171159 | validated |
| tarbase | hsa-miR-301a-3p | ZNF692  | 55657  | ENSG00000171163 | validated |
| tarbase | hsa-miR-181a-5p | NETO2   | 81831  | ENSG00000171208 | validated |
| tarbase | hsa-miR-181a-5p | JUNB    | 3726   | ENSG00000171223 | validated |
| tarbase | hsa-miR-212-3p  | LRG1    | 116844 | ENSG00000171236 | validated |
| tarbase | hsa-miR-582-3p  | SHCBP1  | 79801  | ENSG00000171241 | validated |
| tarbase | hsa-miR-106b-5p | SHCBP1  | 79801  | ENSG00000171241 | validated |
| tarbase | hsa-miR-181a-5p | FAM98B  | 283742 | ENSG00000171262 | validated |
| tarbase | hsa-miR-15b-5p  | CHD7    | 55636  | ENSG00000171316 | validated |
| tarbase | hsa-miR-181a-5p | CHD7    | 55636  | ENSG00000171316 | validated |
| tarbase | hsa-miR-326     | CHD7    | 55636  | ENSG00000171316 | validated |
| tarbase | hsa-miR-582-5p  | CHD7    | 55636  | ENSG00000171316 | validated |
| tarbase | hsa-miR-301a-3p | ESCO2   | 157570 | ENSG00000171320 | validated |
| tarbase | hsa-miR-15b-5p  | CLCN5   | 1184   | ENSG00000171365 | validated |
| tarbase | hsa-miR-301a-3p | CLCN5   | 1184   | ENSG00000171365 | validated |
| tarbase | hsa-miR-582-5p  | PDE7B   | 27115  | ENSG00000171408 | validated |
| tarbase | hsa-miR-212-3p  | KRT20   | 54474  | ENSG00000171431 | validated |
| tarbase | hsa-miR-181a-5p | KSR2    | 283455 | ENSG00000171435 | validated |
| tarbase | hsa-miR-301a-3p | DSEL    | 92126  | ENSG00000171451 | validated |
| tarbase | hsa-miR-15b-5p  | POLR1C  | 9533   | ENSG00000171453 | validated |
| tarbase | hsa-miR-192-5p  | POLR1C  | 9533   | ENSG00000171453 | validated |
| tarbase | hsa-miR-21-5p   | POLR1C  | 9533   | ENSG00000171453 | validated |
| tarbase | hsa-miR-181a-5p | ASXL1   | 171023 | ENSG00000171456 | validated |
| tarbase | hsa-miR-326     | ASXL1   | 171023 | ENSG00000171456 | validated |
| tarbase | hsa-miR-181a-5p | ZNF561  | 93134  | ENSG00000171469 | validated |
| tarbase | hsa-miR-582-3p  | WIPF2   | 147179 | ENSG00000171475 | validated |
| tarbase | hsa-miR-181a-5p | LRRC8C  | 84230  | ENSG00000171488 | validated |
| tarbase | hsa-miR-181a-5p | RSL1D1  | 26156  | ENSG00000171490 | validated |
| tarbase | hsa-miR-326     | RSL1D1  | 26156  | ENSG00000171490 | validated |
| tarbase | hsa-miR-106b-5p | LRRC8D  | 55144  | ENSG00000171492 | validated |
| tarbase | hsa-miR-18a-5p  | LRRC8D  | 55144  | ENSG00000171492 | validated |
| tarbase | hsa-miR-192-5p  | LRRC8D  | 55144  | ENSG00000171492 | validated |
| tarbase | hsa-miR-212-3p  | ETFDH   | 2110   | ENSG00000171503 | validated |
| tarbase | hsa-miR-15b-5p  | LPAR3   | 23566  | ENSG00000171517 | validated |
| tarbase | hsa-miR-296-5p  | TBCA    | 6902   | ENSG00000171530 | validated |
| tarbase | hsa-miR-106b-5p | OTP     | 23440  | ENSG00000171540 | validated |
| tarbase | hsa-miR-21-5p   | FGF     | 2244   | ENSG00000171564 | validated |
| tarbase | hsa-miR-106b-5p | CLSTN1  | 22883  | ENSG00000171603 | validated |
| tarbase | hsa-miR-181a-5p | CLSTN1  | 22883  | ENSG00000171603 | validated |
| tarbase | hsa-miR-21-5p   | CLSTN1  | 22883  | ENSG00000171603 | validated |
| tarbase | hsa-miR-18a-5p  | ENC1    | 8507   | ENSG00000171617 | validated |
| tarbase | hsa-miR-21-5p   | ENC1    | 8507   | ENSG00000171617 | validated |
| tarbase | hsa-miR-582-5p  | ENC1    | 8507   | ENSG00000171617 | validated |
| tarbase | hsa-miR-15b-5p  | ENC1    | 8507   | ENSG00000171617 | validated |
| tarbase | hsa-miR-212-3p  | ENC1    | 8507   | ENSG00000171617 | validated |
| tarbase | hsa-miR-106b-5p | BPTF    | 2186   | ENSG00000171634 | validated |
| tarbase | hsa-miR-181a-5p | BPTF    | 2186   | ENSG00000171634 | validated |
| tarbase | hsa-miR-18a-5p  | ATF7IP  | 55729  | ENSG00000171681 | validated |
| tarbase | hsa-miR-192-5p  | ATF7IP  | 55729  | ENSG00000171681 | validated |
| tarbase | hsa-miR-212-3p  | ATF7IP  | 55729  | ENSG00000171681 | validated |
| tarbase | hsa-miR-192-5p  | TCEA2   | 6919   | ENSG00000171703 | validated |
| tarbase | hsa-miR-21-5p   | ANO5    | 203859 | ENSG00000171714 | validated |
| tarbase | hsa-miR-181a-5p | ANO5    | 203859 | ENSG00000171714 | validated |
| tarbase | hsa-miR-326     | HDAC3   | 8841   | ENSG00000171720 | validated |
| tarbase | hsa-miR-144-3p  | VAT1L   | 57687  | ENSG00000171724 | validated |
| tarbase | hsa-miR-212-3p  | TMEM51  | 55092  | ENSG00000171729 | validated |
| tarbase | hsa-miR-18a-5p  | CAMTA1  | 23261  | ENSG00000171735 | validated |
| tarbase | hsa-miR-296-5p  | CAMTA1  | 23261  | ENSG00000171735 | validated |
| tarbase | hsa-miR-301a-3p | CAMTA1  | 23261  | ENSG00000171735 | validated |
| tarbase | hsa-miR-181a-5p | GATM    | 2628   | ENSG00000171766 | validated |
| tarbase | hsa-miR-582-5p  | BCL2    | 596    | ENSG00000171791 | validated |
| tarbase | hsa-miR-21-5p   | CTPS1   | 1503   | ENSG00000171793 | validated |
| tarbase | hsa-miR-296-5p  | KNDC1   | 85442  | ENSG00000171798 | validated |
| tarbase | hsa-miR-106b-5p | PWWP2B  | 170394 | ENSG00000171813 | validated |
| tarbase | hsa-miR-15b-5p  | PWWP2B  | 170394 | ENSG00000171813 | validated |
| tarbase | hsa-miR-106b-5p | EXOSC10 | 5394   | ENSG00000171824 | validated |
| tarbase | hsa-miR-181a-5p | ZNF570  | 148268 | ENSG00000171827 | validated |
| tarbase | hsa-miR-212-3p  | FAM90A1 | 55138  | ENSG00000171847 | validated |
| tarbase | hsa-miR-18a-5p  | RRM2    | 6241   | ENSG00000171848 | validated |
| tarbase | hsa-miR-212-3p  | RRM2    | 6241   | ENSG00000171848 | validated |
| tarbase | hsa-miR-212-3p  | IFNB1   | 3456   | ENSG00000171855 | validated |

|         |                 |         |        |                 |           |
|---------|-----------------|---------|--------|-----------------|-----------|
| tarbase | hsa-miR-212-3p  | C3AR1   | 719    | ENSG00000171860 | validated |
| tarbase | hsa-miR-21-5p   | MRM3    | 55178  | ENSG00000171861 | validated |
| tarbase | hsa-miR-582-3p  | PTEN    | 5728   | ENSG00000171862 | validated |
| tarbase | hsa-miR-181a-5p | PRNP    | 5621   | ENSG00000171867 | validated |
| tarbase | hsa-miR-106b-5p | AQP4    | 361    | ENSG00000171885 | validated |
| tarbase | hsa-miR-181a-5p | AQP4    | 361    | ENSG00000171885 | validated |
| tarbase | hsa-miR-301a-3p | TVP23B  | 51030  | ENSG00000171928 | validated |
| tarbase | hsa-miR-106b-5p | ZNF217  | 7764   | ENSG00000171940 | validated |
| tarbase | hsa-miR-144-3p  | ZNF217  | 7764   | ENSG00000171940 | validated |
| tarbase | hsa-miR-181a-5p | ZNF217  | 7764   | ENSG00000171940 | validated |
| tarbase | hsa-miR-18a-5p  | ZNF217  | 7764   | ENSG00000171940 | validated |
| tarbase | hsa-miR-212-3p  | ZNF217  | 7764   | ENSG00000171940 | validated |
| tarbase | hsa-miR-301a-3p | ZNF217  | 7764   | ENSG00000171940 | validated |
| tarbase | hsa-miR-582-3p  | ZNF217  | 7764   | ENSG00000171940 | validated |
| tarbase | hsa-miR-582-5p  | ZNF217  | 7764   | ENSG00000171940 | validated |
| tarbase | hsa-miR-181a-5p | SCG2    | 7857   | ENSG00000171951 | validated |
| tarbase | hsa-miR-106b-5p | FOXB1   | 27023  | ENSG00000171956 | validated |
| tarbase | hsa-miR-181a-5p | FOXB1   | 27023  | ENSG00000171956 | validated |
| tarbase | hsa-miR-212-3p  | DRC3    | 83450  | ENSG00000171962 | validated |
| tarbase | hsa-miR-144-3p  | JMJD1C  | 221037 | ENSG00000171988 | validated |
| tarbase | hsa-miR-15b-5p  | JMJD1C  | 221037 | ENSG00000171988 | validated |
| tarbase | hsa-miR-181a-5p | JMJD1C  | 221037 | ENSG00000171988 | validated |
| tarbase | hsa-miR-21-5p   | JMJD1C  | 221037 | ENSG00000171988 | validated |
| tarbase | hsa-miR-582-5p  | JMJD1C  | 221037 | ENSG00000171988 | validated |
| tarbase | hsa-miR-212-3p  | LDHAL6B | 92483  | ENSG00000171989 | validated |
| tarbase | hsa-miR-15b-5p  | THOP1   | 7064   | ENSG00000172009 | validated |
| tarbase | hsa-miR-301a-3p | THOP1   | 7064   | ENSG00000172009 | validated |
| tarbase | hsa-miR-212-3p  | REG1B   | 5968   | ENSG00000172023 | validated |
| tarbase | hsa-miR-222-3p  | QARS1   | 5859   | ENSG00000172053 | validated |
| tarbase | hsa-miR-15b-5p  | ORMDL3  | 94103  | ENSG00000172057 | validated |
| tarbase | hsa-miR-222-3p  | ORMDL3  | 94103  | ENSG00000172057 | validated |
| tarbase | hsa-miR-181a-5p | ORMDL3  | 94103  | ENSG00000172057 | validated |
| tarbase | hsa-miR-106b-5p | KLF11   | 8462   | ENSG00000172059 | validated |
| tarbase | hsa-miR-181a-5p | EIF2AK3 | 9451   | ENSG00000172071 | validated |
| tarbase | hsa-miR-21-5p   | EIF2AK3 | 9451   | ENSG00000172071 | validated |
| tarbase | hsa-miR-212-3p  | TEX37   | 200523 | ENSG00000172073 | validated |
| tarbase | hsa-miR-212-3p  | KRCC1   | 51315  | ENSG00000172086 | validated |
| tarbase | hsa-miR-181a-5p | NME6    | 10201  | ENSG00000172113 | validated |
| tarbase | hsa-miR-326     | NME6    | 10201  | ENSG00000172113 | validated |
| tarbase | hsa-miR-582-5p  | CYCS    | 54205  | ENSG00000172115 | validated |
| tarbase | hsa-miR-181a-5p | CYCS    | 54205  | ENSG00000172115 | validated |
| tarbase | hsa-miR-212-3p  | OR1A2   | 26189  | ENSG00000172150 | validated |
| tarbase | hsa-miR-181a-5p | MRPL13  | 28998  | ENSG00000172172 | validated |
| tarbase | hsa-miR-212-3p  | ISG20   | 3669   | ENSG00000172183 | validated |
| tarbase | hsa-miR-181a-5p | NEGR1   | 257194 | ENSG00000172260 | validated |
| tarbase | hsa-miR-301a-3p | ZNF131  | 7690   | ENSG00000172262 | validated |
| tarbase | hsa-miR-181a-5p | ZNF131  | 7690   | ENSG00000172262 | validated |
| tarbase | hsa-miR-212-3p  | MACROD2 | 140733 | ENSG00000172264 | validated |
| tarbase | hsa-miR-106b-5p | CERS6   | 253782 | ENSG00000172292 | validated |
| tarbase | hsa-miR-21-5p   | POP7    | 10248  | ENSG00000172336 | validated |
| tarbase | hsa-miR-582-3p  | POP7    | 10248  | ENSG00000172336 | validated |
| tarbase | hsa-miR-212-3p  | ALG14   | 199857 | ENSG00000172339 | validated |
| tarbase | hsa-miR-15b-5p  | GNB2    | 2783   | ENSG00000172354 | validated |
| tarbase | hsa-miR-181a-5p | ARNT2   | 9915   | ENSG00000172379 | validated |
| tarbase | hsa-miR-212-3p  | ARNT2   | 9915   | ENSG00000172379 | validated |
| tarbase | hsa-miR-106b-5p | GNG12   | 55970  | ENSG00000172380 | validated |
| tarbase | hsa-miR-18a-5p  | GNG12   | 55970  | ENSG00000172380 | validated |
| tarbase | hsa-miR-21-5p   | GNG12   | 55970  | ENSG00000172380 | validated |
| tarbase | hsa-miR-222-3p  | GNG12   | 55970  | ENSG00000172380 | validated |
| tarbase | hsa-miR-301a-3p | GNG12   | 55970  | ENSG00000172380 | validated |
| tarbase | hsa-miR-582-5p  | GNG12   | 55970  | ENSG00000172380 | validated |
| tarbase | hsa-miR-212-3p  | PRSS27  | 83886  | ENSG00000172382 | validated |
| tarbase | hsa-miR-181a-5p | GTPBP2  | 54676  | ENSG00000172432 | validated |
| tarbase | hsa-miR-212-3p  | GTPBP2  | 54676  | ENSG00000172432 | validated |
| tarbase | hsa-miR-181a-5p | FUT9    | 10690  | ENSG00000172461 | validated |
| tarbase | hsa-miR-106b-5p | ZNF24   | 7572   | ENSG00000172466 | validated |
| tarbase | hsa-miR-18a-5p  | ZNF24   | 7572   | ENSG00000172466 | validated |
| tarbase | hsa-miR-212-3p  | ZNF24   | 7572   | ENSG00000172466 | validated |
| tarbase | hsa-miR-582-5p  | ZNF24   | 7572   | ENSG00000172466 | validated |
| tarbase | hsa-miR-181a-5p | ZNF24   | 7572   | ENSG00000172466 | validated |
| tarbase | hsa-miR-212-3p  | RAB40A  | 142684 | ENSG00000172476 | validated |

|         |                 |          |        |                 |           |
|---------|-----------------|----------|--------|-----------------|-----------|
| tarbase | hsa-miR-212-3p  | BANP     | 54971  | ENSG00000172530 | validated |
| tarbase | hsa-miR-18a-5p  | HCFC1    | 3054   | ENSG00000172534 | validated |
| tarbase | hsa-miR-326     | HCFC1    | 3054   | ENSG00000172534 | validated |
| tarbase | hsa-miR-505-3p  | PDE3A    | 5139   | ENSG00000172572 | validated |
| tarbase | hsa-miR-582-3p  | PDE3A    | 5139   | ENSG00000172572 | validated |
| tarbase | hsa-miR-21-5p   | KLHL6    | 89857  | ENSG00000172578 | validated |
| tarbase | hsa-miR-181a-5p | CHCHD1   | 118487 | ENSG00000172586 | validated |
| tarbase | hsa-miR-15b-5p  | TMEM134  | 80194  | ENSG00000172663 | validated |
| tarbase | hsa-miR-18a-5p  | ZMAT3    | 64393  | ENSG00000172667 | validated |
| tarbase | hsa-miR-21-5p   | ZMAT3    | 64393  | ENSG00000172667 | validated |
| tarbase | hsa-miR-106b-5p | ZNF738   | 148203 | ENSG00000172687 | validated |
| tarbase | hsa-miR-15b-5p  | SLFN11   | 91607  | ENSG00000172716 | validated |
| tarbase | hsa-miR-181a-5p | SLFN11   | 91607  | ENSG00000172716 | validated |
| tarbase | hsa-miR-21-5p   | SLFN11   | 91607  | ENSG00000172716 | validated |
| tarbase | hsa-miR-18a-5p  | SLFN11   | 91607  | ENSG00000172716 | validated |
| tarbase | hsa-miR-222-3p  | FUT10    | 84750  | ENSG00000172728 | validated |
| tarbase | hsa-miR-212-3p  | ZNF596   | 169270 | ENSG00000172748 | validated |
| tarbase | hsa-miR-181a-5p | CFL1     | 1072   | ENSG00000172757 | validated |
| tarbase | hsa-miR-21-5p   | CFL1     | 1072   | ENSG00000172757 | validated |
| tarbase | hsa-miR-505-3p  | CFL1     | 1072   | ENSG00000172757 | validated |
| tarbase | hsa-miR-106b-5p | TMCC1    | 23023  | ENSG00000172765 | validated |
| tarbase | hsa-miR-15b-5p  | TMCC1    | 23023  | ENSG00000172765 | validated |
| tarbase | hsa-miR-18a-5p  | PSME3IP1 | 80011  | ENSG00000172775 | validated |
| tarbase | hsa-miR-144-3p  | DCP2     | 167227 | ENSG00000172795 | validated |
| tarbase | hsa-miR-15b-5p  | DCP2     | 167227 | ENSG00000172795 | validated |
| tarbase | hsa-miR-181a-5p | DCP2     | 167227 | ENSG00000172795 | validated |
| tarbase | hsa-miR-212-3p  | DCP2     | 167227 | ENSG00000172795 | validated |
| tarbase | hsa-miR-301a-3p | DCP2     | 167227 | ENSG00000172795 | validated |
| tarbase | hsa-miR-15b-5p  | PDP2     | 57546  | ENSG00000172840 | validated |
| tarbase | hsa-miR-15b-5p  | SP3      | 6670   | ENSG00000172845 | validated |
| tarbase | hsa-miR-181a-5p | SP3      | 6670   | ENSG00000172845 | validated |
| tarbase | hsa-miR-192-5p  | SP3      | 6670   | ENSG00000172845 | validated |
| tarbase | hsa-miR-212-3p  | SP3      | 6670   | ENSG00000172845 | validated |
| tarbase | hsa-miR-21-5p   | SP3      | 6670   | ENSG00000172845 | validated |
| tarbase | hsa-miR-582-5p  | SP3      | 6670   | ENSG00000172845 | validated |
| tarbase | hsa-miR-18a-5p  | DMXL1    | 1657   | ENSG00000172869 | validated |
| tarbase | hsa-miR-21-5p   | DMXL1    | 1657   | ENSG00000172869 | validated |
| tarbase | hsa-miR-181a-5p | DMXL1    | 1657   | ENSG00000172869 | validated |
| tarbase | hsa-miR-212-3p  | METAP1D  | 254042 | ENSG00000172878 | validated |
| tarbase | hsa-miR-181a-5p | ZNF621   | 285268 | ENSG00000172888 | validated |
| tarbase | hsa-miR-582-3p  | ZNF621   | 285268 | ENSG00000172888 | validated |
| tarbase | hsa-miR-15b-5p  | NBEA     | 26960  | ENSG00000172915 | validated |
| tarbase | hsa-miR-15b-5p  | MYD88    | 4615   | ENSG00000172936 | validated |
| tarbase | hsa-miR-21-5p   | XKR3     | 150165 | ENSG00000172967 | validated |
| tarbase | hsa-miR-18a-5p  | DCAKD    | 79877  | ENSG00000172992 | validated |
| tarbase | hsa-miR-181a-5p | TADA2B   | 93624  | ENSG00000173011 | validated |
| tarbase | hsa-miR-301a-3p | GRK2     | 156    | ENSG00000173020 | validated |
| tarbase | hsa-miR-106b-5p | ZNF680   | 340252 | ENSG00000173041 | validated |
| tarbase | hsa-miR-582-3p  | ZNF680   | 340252 | ENSG00000173041 | validated |
| tarbase | hsa-miR-15b-5p  | HECTD4   | 283450 | ENSG00000173064 | validated |
| tarbase | hsa-miR-582-3p  | HECTD4   | 283450 | ENSG00000173064 | validated |
| tarbase | hsa-miR-222-3p  | FAM222B  | 55731  | ENSG00000173065 | validated |
| tarbase | hsa-miR-106b-5p | BNC2     | 54796  | ENSG00000173068 | validated |
| tarbase | hsa-miR-15b-5p  | BNC2     | 54796  | ENSG00000173068 | validated |
| tarbase | hsa-miR-18a-5p  | RXFP4    | 339403 | ENSG00000173080 | validated |
| tarbase | hsa-miR-18a-5p  | HPSE     | 10855  | ENSG00000173083 | validated |
| tarbase | hsa-miR-106b-5p | COQ2     | 27235  | ENSG00000173085 | validated |
| tarbase | hsa-miR-18a-5p  | LRRN3    | 54674  | ENSG00000173114 | validated |
| tarbase | hsa-miR-106b-5p | KDM2A    | 22992  | ENSG00000173120 | validated |
| tarbase | hsa-miR-301a-3p | KDM2A    | 22992  | ENSG00000173120 | validated |
| tarbase | hsa-miR-326     | KDM2A    | 22992  | ENSG00000173120 | validated |
| tarbase | hsa-miR-582-5p  | KDM2A    | 22992  | ENSG00000173120 | validated |
| tarbase | hsa-miR-212-3p  | ADCK5    | 203054 | ENSG00000173137 | validated |
| tarbase | hsa-miR-106b-5p | RAPH1    | 65059  | ENSG00000173166 | validated |
| tarbase | hsa-miR-222-3p  | RAPH1    | 65059  | ENSG00000173166 | validated |
| tarbase | hsa-miR-296-5p  | RAPH1    | 65059  | ENSG00000173166 | validated |
| tarbase | hsa-miR-212-3p  | PARP14   | 54625  | ENSG00000173193 | validated |
| tarbase | hsa-miR-106b-5p | ABCD2    | 225    | ENSG00000173208 | validated |
| tarbase | hsa-miR-192-5p  | AHSA2P   |        | ENSG00000173209 | validated |
| tarbase | hsa-miR-21-5p   | AHSA2P   |        | ENSG00000173209 | validated |
| tarbase | hsa-miR-106b-5p | VANGL1   | 81839  | ENSG00000173218 | validated |



|         |                 |           |        |                 |           |
|---------|-----------------|-----------|--------|-----------------|-----------|
| tarbase | hsa-miR-301a-3p | VANGL1    | 81839  | ENSG00000173218 | validated |
| tarbase | hsa-miR-582-5p  | VANGL1    | 81839  | ENSG00000173218 | validated |
| tarbase | hsa-miR-21-5p   | IQCB1     | 9657   | ENSG00000173226 | validated |
| tarbase | hsa-miR-106b-5p | GOLGB1    | 2804   | ENSG00000173230 | validated |
| tarbase | hsa-miR-15b-5p  | GOLGB1    | 2804   | ENSG00000173230 | validated |
| tarbase | hsa-miR-21-5p   | GOLGB1    | 2804   | ENSG00000173230 | validated |
| tarbase | hsa-miR-181a-5p | ZNF483    | 158399 | ENSG00000173258 | validated |
| tarbase | hsa-miR-15b-5p  | TNKS      | 8658   | ENSG00000173273 | validated |
| tarbase | hsa-miR-212-3p  | TNKS      | 8658   | ENSG00000173273 | validated |
| tarbase | hsa-miR-106b-5p | ZBTB21    | 49854  | ENSG00000173276 | validated |
| tarbase | hsa-miR-15b-5p  | ZBTB21    | 49854  | ENSG00000173276 | validated |
| tarbase | hsa-miR-181a-5p | ZBTB21    | 49854  | ENSG00000173276 | validated |
| tarbase | hsa-miR-18a-5p  | ZBTB21    | 49854  | ENSG00000173276 | validated |
| tarbase | hsa-miR-301a-3p | ZBTB21    | 49854  | ENSG00000173276 | validated |
| tarbase | hsa-miR-181a-5p | PPP1R3B   | 79660  | ENSG00000173281 | validated |
| tarbase | hsa-miR-21-5p   | PPP1R3B   | 79660  | ENSG00000173281 | validated |
| tarbase | hsa-miR-106b-5p | TRIB1     | 10221  | ENSG00000173334 | validated |
| tarbase | hsa-miR-212-3p  | TRIB1     | 10221  | ENSG00000173334 | validated |
| tarbase | hsa-miR-301a-3p | TRIB1     | 10221  | ENSG00000173334 | validated |
| tarbase | hsa-miR-582-3p  | OLR1      | 4973   | ENSG00000173391 | validated |
| tarbase | hsa-miR-582-5p  | DAG1      | 1605   | ENSG00000173402 | validated |
| tarbase | hsa-miR-21-5p   | DAG1      | 1605   | ENSG00000173402 | validated |
| tarbase | hsa-miR-181a-5p | ARV1      | 64801  | ENSG00000173409 | validated |
| tarbase | hsa-miR-15b-5p  | NAA20     | 51126  | ENSG00000173418 | validated |
| tarbase | hsa-miR-181a-5p | NAA20     | 51126  | ENSG00000173418 | validated |
| tarbase | hsa-miR-582-5p  | CCDC36    | 339834 | ENSG00000173421 | validated |
| tarbase | hsa-miR-582-5p  | THAP2     | 83591  | ENSG00000173451 | validated |
| tarbase | hsa-miR-212-3p  | THAP2     | 83591  | ENSG00000173451 | validated |
| tarbase | hsa-miR-18a-5p  | SMARCC1   | 6599   | ENSG00000173473 | validated |
| tarbase | hsa-miR-18a-5p  | ZNF417    | 147687 | ENSG00000173480 | validated |
| tarbase | hsa-miR-222-3p  | PTPRM     | 5797   | ENSG00000173482 | validated |
| tarbase | hsa-miR-181a-5p | PEAK1     | 79834  | ENSG00000173517 | validated |
| tarbase | hsa-miR-582-3p  | PEAK1     | 79834  | ENSG00000173517 | validated |
| tarbase | hsa-miR-582-5p  | PEAK1     | 79834  | ENSG00000173517 | validated |
| tarbase | hsa-miR-582-5p  | TNFRSF10D | 8793   | ENSG00000173530 | validated |
| tarbase | hsa-miR-212-3p  | TNFRSF10D | 8793   | ENSG00000173530 | validated |
| tarbase | hsa-miR-106b-5p | MOB1B     | 92597  | ENSG00000173542 | validated |
| tarbase | hsa-miR-18a-5p  | MOB1B     | 92597  | ENSG00000173542 | validated |
| tarbase | hsa-miR-106b-5p | ZNF622    | 90441  | ENSG00000173545 | validated |
| tarbase | hsa-miR-181a-5p | ZNF622    | 90441  | ENSG00000173545 | validated |
| tarbase | hsa-miR-106b-5p | CHD2      | 1106   | ENSG00000173575 | validated |
| tarbase | hsa-miR-15b-5p  | CHD2      | 1106   | ENSG00000173575 | validated |
| tarbase | hsa-miR-181a-5p | CHD2      | 1106   | ENSG00000173575 | validated |
| tarbase | hsa-miR-326     | CHD2      | 1106   | ENSG00000173575 | validated |
| tarbase | hsa-miR-15b-5p  | CEP83     | 51134  | ENSG00000173588 | validated |
| tarbase | hsa-miR-582-5p  | CEP83     | 51134  | ENSG00000173588 | validated |
| tarbase | hsa-miR-15b-5p  | SCAI      | 286205 | ENSG00000173611 | validated |
| tarbase | hsa-miR-505-3p  | SCAI      | 286205 | ENSG00000173611 | validated |
| tarbase | hsa-miR-15b-5p  | RCE1      | 9986   | ENSG00000173653 | validated |
| tarbase | hsa-miR-15b-5p  | UQCRH     | 7388   | ENSG00000173660 | validated |
| tarbase | hsa-miR-181a-5p | EIF1AX    | 1964   | ENSG00000173674 | validated |
| tarbase | hsa-miR-326     | EIF1AX    | 1964   | ENSG00000173674 | validated |
| tarbase | hsa-miR-582-5p  | EIF1AX    | 1964   | ENSG00000173674 | validated |
| tarbase | hsa-miR-181a-5p | BCLAF3    | 256643 | ENSG00000173681 | validated |
| tarbase | hsa-miR-212-3p  | BCLAF3    | 256643 | ENSG00000173681 | validated |
| tarbase | hsa-miR-301a-3p | PSMD1     | 5707   | ENSG00000173692 | validated |
| tarbase | hsa-miR-582-3p  | PSMD1     | 5707   | ENSG00000173692 | validated |
| tarbase | hsa-miR-106b-5p | HEG1      | 57493  | ENSG00000173706 | validated |
| tarbase | hsa-miR-181a-5p | HEG1      | 57493  | ENSG00000173706 | validated |
| tarbase | hsa-miR-222-3p  | HEG1      | 57493  | ENSG00000173706 | validated |
| tarbase | hsa-miR-326     | C11orf80  | 79703  | ENSG00000173715 | validated |
| tarbase | hsa-miR-15b-5p  | TOMM20    | 9804   | ENSG00000173726 | validated |
| tarbase | hsa-miR-181a-5p | TOMM20    | 9804   | ENSG00000173726 | validated |
| tarbase | hsa-miR-582-5p  | TOMM20    | 9804   | ENSG00000173726 | validated |
| tarbase | hsa-miR-106b-5p | AGFG1     | 3267   | ENSG00000173744 | validated |
| tarbase | hsa-miR-192-5p  | AGFG1     | 3267   | ENSG00000173744 | validated |
| tarbase | hsa-miR-301a-3p | AGFG1     | 3267   | ENSG00000173744 | validated |
| tarbase | hsa-miR-15b-5p  | JUP       | 3728   | ENSG00000173801 | validated |
| tarbase | hsa-miR-181a-5p | EIF1      | 10209  | ENSG00000173812 | validated |
| tarbase | hsa-miR-18a-5p  | EIF1      | 10209  | ENSG00000173812 | validated |
| tarbase | hsa-miR-222-3p  | EIF1      | 10209  | ENSG00000173812 | validated |

|         |                 |          |        |                 |           |
|---------|-----------------|----------|--------|-----------------|-----------|
| tarbase | hsa-miR-582-5p  | EIF1     | 10209  | ENSG00000173812 | validated |
| tarbase | hsa-miR-15b-5p  | ENDOV    | 284131 | ENSG00000173818 | validated |
| tarbase | hsa-miR-15b-5p  | RNF213   | 57674  | ENSG00000173821 | validated |
| tarbase | hsa-miR-18a-5p  | RNF213   | 57674  | ENSG00000173821 | validated |
| tarbase | hsa-miR-21-5p   | RNF213   | 57674  | ENSG00000173821 | validated |
| tarbase | hsa-miR-505-3p  | RNF213   | 57674  | ENSG00000173821 | validated |
| tarbase | hsa-miR-15b-5p  | NET1     | 10276  | ENSG00000173848 | validated |
| tarbase | hsa-miR-212-3p  | NET1     | 10276  | ENSG00000173848 | validated |
| tarbase | hsa-miR-301a-3p | DPY19L1  | 23333  | ENSG00000173852 | validated |
| tarbase | hsa-miR-181a-5p | DPY19L1  | 23333  | ENSG00000173852 | validated |
| tarbase | hsa-miR-21-5p   | ZNF791   | 163049 | ENSG00000173875 | validated |
| tarbase | hsa-miR-106b-5p | PHC3     | 80012  | ENSG00000173889 | validated |
| tarbase | hsa-miR-18a-5p  | PHC3     | 80012  | ENSG00000173889 | validated |
| tarbase | hsa-miR-212-3p  | PHC3     | 80012  | ENSG00000173889 | validated |
| tarbase | hsa-miR-21-5p   | PHC3     | 80012  | ENSG00000173889 | validated |
| tarbase | hsa-miR-582-3p  | PHC3     | 80012  | ENSG00000173889 | validated |
| tarbase | hsa-miR-15b-5p  | SPTBN2   | 6712   | ENSG00000173898 | validated |
| tarbase | hsa-miR-15b-5p  | GOLIM4   | 27333  | ENSG00000173905 | validated |
| tarbase | hsa-miR-181a-5p | GOLIM4   | 27333  | ENSG00000173905 | validated |
| tarbase | hsa-miR-15b-5p  | RBM4B    | 83759  | ENSG00000173914 | validated |
| tarbase | hsa-miR-212-3p  | RBM4B    | 83759  | ENSG00000173914 | validated |
| tarbase | hsa-miR-106b-5p | HOXB2    | 3212   | ENSG00000173917 | validated |
| tarbase | hsa-miR-181a-5p | MARCF3   | 115123 | ENSG00000173926 | validated |
| tarbase | hsa-miR-15b-5p  | RBM4     | 5936   | ENSG00000173933 | validated |
| tarbase | hsa-miR-181a-5p | RBM4     | 5936   | ENSG00000173933 | validated |
| tarbase | hsa-miR-222-3p  | RBM4     | 5936   | ENSG00000173933 | validated |
| tarbase | hsa-miR-301a-3p | RBM4     | 5936   | ENSG00000173933 | validated |
| tarbase | hsa-miR-301a-3p | UBXN2A   | 165324 | ENSG00000173960 | validated |
| tarbase | hsa-miR-18a-5p  | KLHL15   | 80311  | ENSG00000174010 | validated |
| tarbase | hsa-miR-301a-3p | KLHL15   | 80311  | ENSG00000174010 | validated |
| tarbase | hsa-miR-582-3p  | KLHL15   | 80311  | ENSG00000174010 | validated |
| tarbase | hsa-miR-505-3p  | KLHL15   | 80311  | ENSG00000174010 | validated |
| tarbase | hsa-miR-144-3p  | FBXO45   | 200933 | ENSG00000174013 | validated |
| tarbase | hsa-miR-181a-5p | FBXO45   | 200933 | ENSG00000174013 | validated |
| tarbase | hsa-miR-181a-5p | SLC25A30 | 253512 | ENSG00000174032 | validated |
| tarbase | hsa-miR-15b-5p  | LEMD3    | 23592  | ENSG00000174106 | validated |
| tarbase | hsa-miR-181a-5p | LEMD3    | 23592  | ENSG00000174106 | validated |
| tarbase | hsa-miR-18a-5p  | FAM174A  | 345757 | ENSG00000174132 | validated |
| tarbase | hsa-miR-582-5p  | FAM174A  | 345757 | ENSG00000174132 | validated |
| tarbase | hsa-miR-144-3p  | RGMB     | 285704 | ENSG00000174136 | validated |
| tarbase | hsa-miR-18a-5p  | RGMB     | 285704 | ENSG00000174136 | validated |
| tarbase | hsa-miR-222-3p  | RGMB     | 285704 | ENSG00000174136 | validated |
| tarbase | hsa-miR-582-3p  | RGMB     | 285704 | ENSG00000174136 | validated |
| tarbase | hsa-miR-181a-5p | RGMB     | 285704 | ENSG00000174136 | validated |
| tarbase | hsa-miR-212-3p  | NWD2     | 57495  | ENSG00000174145 | validated |
| tarbase | hsa-miR-106b-5p | CYB561D1 | 284613 | ENSG00000174151 | validated |
| tarbase | hsa-miR-21-5p   | CYB561D1 | 284613 | ENSG00000174151 | validated |
| tarbase | hsa-miR-582-3p  | CYB561D1 | 284613 | ENSG00000174151 | validated |
| tarbase | hsa-miR-212-3p  | CYB561D1 | 284613 | ENSG00000174151 | validated |
| tarbase | hsa-miR-15b-5p  | MGA      | 23269  | ENSG00000174197 | validated |
| tarbase | hsa-miR-181a-5p | MGA      | 23269  | ENSG00000174197 | validated |
| tarbase | hsa-miR-326     | MGA      | 23269  | ENSG00000174197 | validated |
| tarbase | hsa-miR-582-5p  | MGA      | 23269  | ENSG00000174197 | validated |
| tarbase | hsa-miR-15b-5p  | C12orf66 | 144577 | ENSG00000174206 | validated |
| tarbase | hsa-miR-21-5p   | C12orf66 | 144577 | ENSG00000174206 | validated |
| tarbase | hsa-miR-326     | C12orf66 | 144577 | ENSG00000174206 | validated |
| tarbase | hsa-miR-212-3p  | C12orf66 | 144577 | ENSG00000174206 | validated |
| tarbase | hsa-miR-582-5p  | SNX31    | 169166 | ENSG00000174226 | validated |
| tarbase | hsa-miR-15b-5p  | PRPF8    | 10594  | ENSG00000174231 | validated |
| tarbase | hsa-miR-181a-5p | PRPF8    | 10594  | ENSG00000174231 | validated |
| tarbase | hsa-miR-18a-5p  | PRPF8    | 10594  | ENSG00000174231 | validated |
| tarbase | hsa-miR-296-5p  | PRPF8    | 10594  | ENSG00000174231 | validated |
| tarbase | hsa-miR-301a-3p | PRPF8    | 10594  | ENSG00000174231 | validated |
| tarbase | hsa-miR-15b-5p  | ADCY6    | 112    | ENSG00000174233 | validated |
| tarbase | hsa-miR-296-5p  | PITPNA   | 5306   | ENSG00000174238 | validated |
| tarbase | hsa-miR-301a-3p | DDX23    | 9416   | ENSG00000174243 | validated |
| tarbase | hsa-miR-212-3p  | ZNHIT2   | 741    | ENSG00000174276 | validated |
| tarbase | hsa-miR-18a-5p  | ZBTB4    | 57659  | ENSG00000174282 | validated |
| tarbase | hsa-miR-192-5p  | ZBTB4    | 57659  | ENSG00000174282 | validated |
| tarbase | hsa-miR-326     | ZBTB4    | 57659  | ENSG00000174282 | validated |
| tarbase | hsa-miR-582-3p  | ZBTB4    | 57659  | ENSG00000174282 | validated |

|         |                 |          |        |                 |           |
|---------|-----------------|----------|--------|-----------------|-----------|
| tarbase | hsa-miR-106b-5p | ZHX3     | 23051  | ENSG00000174306 | validated |
| tarbase | hsa-miR-18a-5p  | ZHX3     | 23051  | ENSG00000174306 | validated |
| tarbase | hsa-miR-15b-5p  | PHLDA3   | 23612  | ENSG00000174307 | validated |
| tarbase | hsa-miR-212-3p  | C11orf45 | 219833 | ENSG00000174370 | validated |
| tarbase | hsa-miR-18a-5p  | EXO1     | 9156   | ENSG00000174371 | validated |
| tarbase | hsa-miR-192-5p  | EXO1     | 9156   | ENSG00000174371 | validated |
| tarbase | hsa-miR-106b-5p | EXO1     | 9156   | ENSG00000174371 | validated |
| tarbase | hsa-miR-144-3p  | LIG4     | 3981   | ENSG00000174405 | validated |
| tarbase | hsa-miR-15b-5p  | LIG4     | 3981   | ENSG00000174405 | validated |
| tarbase | hsa-miR-582-5p  | LIG4     | 3981   | ENSG00000174405 | validated |
| tarbase | hsa-miR-222-3p  | MIR1-1HG | 128826 | ENSG00000174407 | validated |
| tarbase | hsa-miR-106b-5p | ATP2A2   | 488    | ENSG00000174437 | validated |
| tarbase | hsa-miR-181a-5p | ATP2A2   | 488    | ENSG00000174437 | validated |
| tarbase | hsa-miR-18a-5p  | ATP2A2   | 488    | ENSG00000174437 | validated |
| tarbase | hsa-miR-212-3p  | ATP2A2   | 488    | ENSG00000174437 | validated |
| tarbase | hsa-miR-301a-3p | ATP2A2   | 488    | ENSG00000174437 | validated |
| tarbase | hsa-miR-15b-5p  | C12orf76 | 400073 | ENSG00000174456 | validated |
| tarbase | hsa-miR-18a-5p  | C12orf76 | 400073 | ENSG00000174456 | validated |
| tarbase | hsa-miR-15b-5p  | ZCCHC12  | 170261 | ENSG00000174460 | validated |
| tarbase | hsa-miR-106b-5p | CNTNAP2  | 26047  | ENSG00000174469 | validated |
| tarbase | hsa-miR-192-5p  | GALNTL6  | 442117 | ENSG00000174473 | validated |
| tarbase | hsa-miR-18a-5p  | DENND4A  | 10260  | ENSG00000174485 | validated |
| tarbase | hsa-miR-212-3p  | DENND4A  | 10260  | ENSG00000174485 | validated |
| tarbase | hsa-miR-212-3p  | PELI3    | 246330 | ENSG00000174516 | validated |
| tarbase | hsa-miR-181a-5p | AKIRIN1  | 79647  | ENSG00000174574 | validated |
| tarbase | hsa-miR-212-3p  | MSL2     | 55167  | ENSG00000174579 | validated |
| tarbase | hsa-miR-21-5p   | MSL2     | 55167  | ENSG00000174579 | validated |
| tarbase | hsa-miR-301a-3p | MSL2     | 55167  | ENSG00000174579 | validated |
| tarbase | hsa-miR-106b-5p | CMKLR1   | 1240   | ENSG00000174600 | validated |
| tarbase | hsa-miR-181a-5p | ANGEL2   | 90806  | ENSG00000174606 | validated |
| tarbase | hsa-miR-301a-3p | ANGEL2   | 90806  | ENSG00000174606 | validated |
| tarbase | hsa-miR-15b-5p  | UGT8     | 7368   | ENSG00000174607 | validated |
| tarbase | hsa-miR-301a-3p | UGT8     | 7368   | ENSG00000174607 | validated |
| tarbase | hsa-miR-181a-5p | UGT8     | 7368   | ENSG00000174607 | validated |
| tarbase | hsa-miR-21-5p   | UGT8     | 7368   | ENSG00000174607 | validated |
| tarbase | hsa-miR-106b-5p | SLC29A2  | 3177   | ENSG00000174669 | validated |
| tarbase | hsa-miR-15b-5p  | SLC29A2  | 3177   | ENSG00000174669 | validated |
| tarbase | hsa-miR-296-5p  | BRSK2    | 9024   | ENSG00000174672 | validated |
| tarbase | hsa-miR-106b-5p | B4GAT1   | 11041  | ENSG00000174684 | validated |
| tarbase | hsa-miR-15b-5p  | B4GAT1   | 11041  | ENSG00000174684 | validated |
| tarbase | hsa-miR-582-3p  | TMEM167A | 153339 | ENSG00000174695 | validated |
| tarbase | hsa-miR-15b-5p  | RESF1    | 55196  | ENSG00000174718 | validated |
| tarbase | hsa-miR-582-5p  | RESF1    | 55196  | ENSG00000174718 | validated |
| tarbase | hsa-miR-144-3p  | NR1D2    | 9975   | ENSG00000174738 | validated |
| tarbase | hsa-miR-21-5p   | NR1D2    | 9975   | ENSG00000174738 | validated |
| tarbase | hsa-miR-582-5p  | NR1D2    | 9975   | ENSG00000174738 | validated |
| tarbase | hsa-miR-181a-5p | RPL15    | 6138   | ENSG00000174748 | validated |
| tarbase | hsa-miR-181a-5p | SRP72    | 6731   | ENSG00000174780 | validated |
| tarbase | hsa-miR-212-3p  | SRP72    | 6731   | ENSG00000174780 | validated |
| tarbase | hsa-miR-21-5p   | SRP72    | 6731   | ENSG00000174780 | validated |
| tarbase | hsa-miR-181a-5p | CEP135   | 9662   | ENSG00000174799 | validated |
| tarbase | hsa-miR-144-3p  | DENND6A  | 201627 | ENSG00000174839 | validated |
| tarbase | hsa-miR-301a-3p | DENND6A  | 201627 | ENSG00000174839 | validated |
| tarbase | hsa-miR-582-5p  | DENND6A  | 201627 | ENSG00000174839 | validated |
| tarbase | hsa-miR-106b-5p | PDE12    | 201626 | ENSG00000174840 | validated |
| tarbase | hsa-miR-15b-5p  | PDE12    | 201626 | ENSG00000174840 | validated |
| tarbase | hsa-miR-181a-5p | PDE12    | 201626 | ENSG00000174840 | validated |
| tarbase | hsa-miR-18a-5p  | NDUFA11  | 126328 | ENSG00000174886 | validated |
| tarbase | hsa-miR-212-3p  | CATSPERD | 257062 | ENSG00000174898 | validated |
| tarbase | hsa-miR-301a-3p | RAB1B    | 81876  | ENSG00000174903 | validated |
| tarbase | hsa-miR-212-3p  | KCTD13   | 253980 | ENSG00000174943 | validated |
| tarbase | hsa-miR-212-3p  | FUT1     | 2523   | ENSG00000174951 | validated |
| tarbase | hsa-miR-144-3p  | DHX36    | 170506 | ENSG00000174953 | validated |
| tarbase | hsa-miR-15b-5p  | DHX36    | 170506 | ENSG00000174953 | validated |
| tarbase | hsa-miR-582-5p  | ATR      | 545    | ENSG00000175054 | validated |
| tarbase | hsa-miR-106b-5p | UBE2C    | 11065  | ENSG00000175063 | validated |
| tarbase | hsa-miR-106b-5p | VCPIP1   | 80124  | ENSG00000175073 | validated |
| tarbase | hsa-miR-15b-5p  | VCPIP1   | 80124  | ENSG00000175073 | validated |
| tarbase | hsa-miR-181a-5p | VCPIP1   | 80124  | ENSG00000175073 | validated |
| tarbase | hsa-miR-301a-3p | VCPIP1   | 80124  | ENSG00000175073 | validated |
| tarbase | hsa-miR-582-5p  | VCPIP1   | 80124  | ENSG00000175073 | validated |

|         |                 |          |        |                 |           |
|---------|-----------------|----------|--------|-----------------|-----------|
| tarbase | hsa-miR-301a-3p | PDIK1L   | 149420 | ENSG00000175087 | validated |
| tarbase | hsa-miR-15b-5p  | SPSB4    | 92369  | ENSG00000175093 | validated |
| tarbase | hsa-miR-18a-5p  | ZNF654   | 55279  | ENSG00000175105 | validated |
| tarbase | hsa-miR-212-3p  | ZNF654   | 55279  | ENSG00000175105 | validated |
| tarbase | hsa-miR-582-5p  | MRPS22   | 56945  | ENSG00000175110 | validated |
| tarbase | hsa-miR-106b-5p | PACS1    | 55690  | ENSG00000175115 | validated |
| tarbase | hsa-miR-144-3p  | MARCKSL1 | 65108  | ENSG00000175130 | validated |
| tarbase | hsa-miR-181a-5p | MARCKSL1 | 65108  | ENSG00000175130 | validated |
| tarbase | hsa-miR-21-5p   | MARCKSL1 | 65108  | ENSG00000175130 | validated |
| tarbase | hsa-miR-296-5p  | MARCKSL1 | 65108  | ENSG00000175130 | validated |
| tarbase | hsa-miR-582-5p  | MARCKSL1 | 65108  | ENSG00000175130 | validated |
| tarbase | hsa-miR-15b-5p  | SH3BP5L  | 80851  | ENSG00000175137 | validated |
| tarbase | hsa-miR-15b-5p  | CADM2    | 253559 | ENSG00000175161 | validated |
| tarbase | hsa-miR-181a-5p | CADM2    | 253559 | ENSG00000175161 | validated |
| tarbase | hsa-miR-21-5p   | PSMD2    | 5708   | ENSG00000175166 | validated |
| tarbase | hsa-miR-15b-5p  | CTDSP2   | 10106  | ENSG00000175215 | validated |
| tarbase | hsa-miR-181a-5p | CTDSP2   | 10106  | ENSG00000175215 | validated |
| tarbase | hsa-miR-21-5p   | CTDSP2   | 10106  | ENSG00000175215 | validated |
| tarbase | hsa-miR-296-5p  | CTDSP2   | 10106  | ENSG00000175215 | validated |
| tarbase | hsa-miR-192-5p  | CTDSP2   | 10106  | ENSG00000175215 | validated |
| tarbase | hsa-miR-181a-5p | CKAP5    | 9793   | ENSG00000175216 | validated |
| tarbase | hsa-miR-18a-5p  | ARHGAP1  | 392    | ENSG00000175220 | validated |
| tarbase | hsa-miR-296-5p  | MED16    | 10025  | ENSG00000175221 | validated |
| tarbase | hsa-miR-15b-5p  | ATG13    | 9776   | ENSG00000175224 | validated |
| tarbase | hsa-miR-301a-3p | ATG13    | 9776   | ENSG00000175224 | validated |
| tarbase | hsa-miR-212-3p  | GOLGA8A  | 23015  | ENSG00000175265 | validated |
| tarbase | hsa-miR-21-5p   | TP53I11  | 9537   | ENSG00000175274 | validated |
| tarbase | hsa-miR-212-3p  | DOLK     | 22845  | ENSG00000175283 | validated |
| tarbase | hsa-miR-212-3p  | CCNE2    | 9134   | ENSG00000175305 | validated |
| tarbase | hsa-miR-326     | PHYKPL   | 85007  | ENSG00000175309 | validated |
| tarbase | hsa-miR-15b-5p  | GRAMD2A  | 196996 | ENSG00000175318 | validated |
| tarbase | hsa-miR-181a-5p | ZNF519   | 162655 | ENSG00000175322 | validated |
| tarbase | hsa-miR-18a-5p  | ZNF519   | 162655 | ENSG00000175322 | validated |
| tarbase | hsa-miR-181a-5p | TMEM9B   | 56674  | ENSG00000175348 | validated |
| tarbase | hsa-miR-18a-5p  | TMEM9B   | 56674  | ENSG00000175348 | validated |
| tarbase | hsa-miR-301a-3p | TMEM9B   | 56674  | ENSG00000175348 | validated |
| tarbase | hsa-miR-582-5p  | PTPN2    | 5771   | ENSG00000175354 | validated |
| tarbase | hsa-miR-222-3p  | EIF1AD   | 84285  | ENSG00000175376 | validated |
| tarbase | hsa-miR-181a-5p | EIF3F    | 8665   | ENSG00000175390 | validated |
| tarbase | hsa-miR-301a-3p | EIF3F    | 8665   | ENSG00000175390 | validated |
| tarbase | hsa-miR-326     | PCSK1    | 5122   | ENSG00000175426 | validated |
| tarbase | hsa-miR-181a-5p | CCDC14   | 64770  | ENSG00000175455 | validated |
| tarbase | hsa-miR-181a-5p | MCTP1    | 79772  | ENSG00000175471 | validated |
| tarbase | hsa-miR-181a-5p | ALG10B   | 144245 | ENSG00000175548 | validated |
| tarbase | hsa-miR-301a-3p | LONRF3   | 79836  | ENSG00000175556 | validated |
| tarbase | hsa-miR-21-5p   | UCP2     | 7351   | ENSG00000175567 | validated |
| tarbase | hsa-miR-15b-5p  | C11orf68 | 83638  | ENSG00000175573 | validated |
| tarbase | hsa-miR-212-3p  | RAB6A    | 5870   | ENSG00000175582 | validated |
| tarbase | hsa-miR-106b-5p | FOSL1    | 8061   | ENSG00000175592 | validated |
| tarbase | hsa-miR-18a-5p  | FOSL1    | 8061   | ENSG00000175592 | validated |
| tarbase | hsa-miR-222-3p  | ERCC4    | 2072   | ENSG00000175595 | validated |
| tarbase | hsa-miR-15b-5p  | ERCC4    | 2072   | ENSG00000175595 | validated |
| tarbase | hsa-miR-212-3p  | TMEM70   | 54968  | ENSG00000175606 | validated |
| tarbase | hsa-miR-301a-3p | TOM1L2   | 146691 | ENSG00000175662 | validated |
| tarbase | hsa-miR-181a-5p | ZNF77    | 58492  | ENSG00000175691 | validated |
| tarbase | hsa-miR-18a-5p  | MLXIP    | 22877  | ENSG00000175727 | validated |
| tarbase | hsa-miR-21-5p   | MLXIP    | 22877  | ENSG00000175727 | validated |
| tarbase | hsa-miR-15b-5p  | NR2F1    | 7025   | ENSG00000175745 | validated |
| tarbase | hsa-miR-212-3p  | SFN      | 2810   | ENSG00000175793 | validated |
| tarbase | hsa-miR-212-3p  | CALCB    | 797    | ENSG00000175868 | validated |
| tarbase | hsa-miR-181a-5p | CREG2    | 200407 | ENSG00000175874 | validated |
| tarbase | hsa-miR-15b-5p  | ZDHHC21  | 340481 | ENSG00000175893 | validated |
| tarbase | hsa-miR-181a-5p | ZDHHC21  | 340481 | ENSG00000175893 | validated |
| tarbase | hsa-miR-181a-5p | ARL4D    | 379    | ENSG00000175906 | validated |
| tarbase | hsa-miR-21-5p   | UBE2O    | 63893  | ENSG00000175931 | validated |
| tarbase | hsa-miR-326     | UBE2O    | 63893  | ENSG00000175931 | validated |
| tarbase | hsa-miR-106b-5p | UBE2O    | 63893  | ENSG00000175931 | validated |
| tarbase | hsa-miR-106b-5p | UNC119B  | 84747  | ENSG00000175970 | validated |
| tarbase | hsa-miR-15b-5p  | B3GALT6  | 126792 | ENSG00000176022 | validated |
| tarbase | hsa-miR-212-3p  | NUPR1    | 26471  | ENSG00000176046 | validated |
| tarbase | hsa-miR-181a-5p | MBLAC2   | 153364 | ENSG00000176055 | validated |

|         |                 |         |        |                 |           |
|---------|-----------------|---------|--------|-----------------|-----------|
| tarbase | hsa-miR-106b-5p | SLC35A4 | 113829 | ENSG00000176087 | validated |
| tarbase | hsa-miR-15b-5p  | SLC35A4 | 113829 | ENSG00000176087 | validated |
| tarbase | hsa-miR-15b-5p  | IP6K1   | 9807   | ENSG00000176095 | validated |
| tarbase | hsa-miR-21-5p   | IP6K1   | 9807   | ENSG00000176095 | validated |
| tarbase | hsa-miR-106b-5p | CSTF3   | 1479   | ENSG00000176102 | validated |
| tarbase | hsa-miR-15b-5p  | YES1    | 7525   | ENSG00000176105 | validated |
| tarbase | hsa-miR-181a-5p | YES1    | 7525   | ENSG00000176105 | validated |
| tarbase | hsa-miR-222-3p  | YES1    | 7525   | ENSG00000176105 | validated |
| tarbase | hsa-miR-181a-5p | TMEM39A | 55254  | ENSG00000176142 | validated |
| tarbase | hsa-miR-301a-3p | LRRTM4  | 80059  | ENSG00000176204 | validated |
| tarbase | hsa-miR-212-3p  | SMIM19  | 114926 | ENSG00000176209 | validated |
| tarbase | hsa-miR-18a-5p  | ZNF404  | 342908 | ENSG00000176222 | validated |
| tarbase | hsa-miR-15b-5p  | SLC35G1 | 159371 | ENSG00000176273 | validated |
| tarbase | hsa-miR-106b-5p | COX8A   | 1351   | ENSG00000176340 | validated |
| tarbase | hsa-miR-15b-5p  | CRLF3   | 51379  | ENSG00000176390 | validated |
| tarbase | hsa-miR-106b-5p | CRLF3   | 51379  | ENSG00000176390 | validated |
| tarbase | hsa-miR-301a-3p | RNPEP   | 6051   | ENSG00000176393 | validated |
| tarbase | hsa-miR-106b-5p | EID2B   | 126272 | ENSG00000176401 | validated |
| tarbase | hsa-miR-106b-5p | KCMF1   | 56888  | ENSG00000176407 | validated |
| tarbase | hsa-miR-15b-5p  | KCMF1   | 56888  | ENSG00000176407 | validated |
| tarbase | hsa-miR-21-5p   | SPRYD4  | 283377 | ENSG00000176422 | validated |
| tarbase | hsa-miR-222-3p  | DIRAS1  | 148252 | ENSG00000176490 | validated |
| tarbase | hsa-miR-106b-5p | PRR15   | 222171 | ENSG00000176532 | validated |
| tarbase | hsa-miR-181a-5p | KBTBD11 | 9920   | ENSG00000176595 | validated |
| tarbase | hsa-miR-296-5p  | LMNB2   | 84823  | ENSG00000176619 | validated |
| tarbase | hsa-miR-212-3p  | LMNB2   | 84823  | ENSG00000176619 | validated |
| tarbase | hsa-miR-18a-5p  | RMDN1   | 51115  | ENSG00000176623 | validated |
| tarbase | hsa-miR-181a-5p | MEX3C   | 51320  | ENSG00000176624 | validated |
| tarbase | hsa-miR-212-3p  | MEX3C   | 51320  | ENSG00000176624 | validated |
| tarbase | hsa-miR-212-3p  | RNF152  | 220441 | ENSG00000176641 | validated |
| tarbase | hsa-miR-192-5p  | MYO1D   | 4642   | ENSG00000176658 | validated |
| tarbase | hsa-miR-212-3p  | MYO1D   | 4642   | ENSG00000176658 | validated |
| tarbase | hsa-miR-301a-3p | MYO1D   | 4642   | ENSG00000176658 | validated |
| tarbase | hsa-miR-192-5p  | FOXL1   | 2300   | ENSG00000176678 | validated |
| tarbase | hsa-miR-15b-5p  | CDK5R1  | 8851   | ENSG00000176749 | validated |
| tarbase | hsa-miR-222-3p  | CDK5R1  | 8851   | ENSG00000176749 | validated |
| tarbase | hsa-miR-301a-3p | CDK5R1  | 8851   | ENSG00000176749 | validated |
| tarbase | hsa-miR-326     | CDK5R1  | 8851   | ENSG00000176749 | validated |
| tarbase | hsa-miR-18a-5p  | CDK5R1  | 8851   | ENSG00000176749 | validated |
| tarbase | hsa-miR-212-3p  | NCKAP5  | 344148 | ENSG00000176771 | validated |
| tarbase | hsa-miR-192-5p  | BASP1   | 10409  | ENSG00000176788 | validated |
| tarbase | hsa-miR-181a-5p | FAM91A1 | 157769 | ENSG00000176853 | validated |
| tarbase | hsa-miR-301a-3p | FAM91A1 | 157769 | ENSG00000176853 | validated |
| tarbase | hsa-miR-582-5p  | FAM91A1 | 157769 | ENSG00000176853 | validated |
| tarbase | hsa-miR-222-3p  | WSB2    | 55884  | ENSG00000176871 | validated |
| tarbase | hsa-miR-106b-5p | SOX11   | 6664   | ENSG00000176887 | validated |
| tarbase | hsa-miR-144-3p  | SOX11   | 6664   | ENSG00000176887 | validated |
| tarbase | hsa-miR-296-5p  | SOX11   | 6664   | ENSG00000176887 | validated |
| tarbase | hsa-miR-326     | SOX11   | 6664   | ENSG00000176887 | validated |
| tarbase | hsa-miR-106b-5p | PNMA1   | 9240   | ENSG00000176903 | validated |
| tarbase | hsa-miR-181a-5p | PNMA1   | 9240   | ENSG00000176903 | validated |
| tarbase | hsa-miR-582-3p  | PNMA1   | 9240   | ENSG00000176903 | validated |
| tarbase | hsa-miR-181a-5p | ANKLE2  | 23141  | ENSG00000176915 | validated |
| tarbase | hsa-miR-212-3p  | EFCAB5  | 374786 | ENSG00000176927 | validated |
| tarbase | hsa-miR-106b-5p | GCNT4   | 51301  | ENSG00000176928 | validated |
| tarbase | hsa-miR-15b-5p  | SEC24C  | 9632   | ENSG00000176986 | validated |
| tarbase | hsa-miR-181a-5p | SEC24C  | 9632   | ENSG00000176986 | validated |
| tarbase | hsa-miR-582-5p  | SEC24C  | 9632   | ENSG00000176986 | validated |
| tarbase | hsa-miR-15b-5p  | SMCR8   | 140775 | ENSG00000176994 | validated |
| tarbase | hsa-miR-106b-5p | SMCR8   | 140775 | ENSG00000176994 | validated |
| tarbase | hsa-miR-144-3p  | MTX3    | 345778 | ENSG00000177034 | validated |
| tarbase | hsa-miR-106b-5p | FBXO46  | 23403  | ENSG00000177051 | validated |
| tarbase | hsa-miR-21-5p   | FBXO46  | 23403  | ENSG00000177051 | validated |
| tarbase | hsa-miR-21-5p   | ZDHHC13 | 54503  | ENSG00000177054 | validated |
| tarbase | hsa-miR-15b-5p  | SLC38A9 | 153129 | ENSG00000177058 | validated |
| tarbase | hsa-miR-212-3p  | POLE    | 5426   | ENSG00000177084 | validated |
| tarbase | hsa-miR-106b-5p | ANO6    | 196527 | ENSG00000177119 | validated |
| tarbase | hsa-miR-181a-5p | ANO6    | 196527 | ENSG00000177119 | validated |
| tarbase | hsa-miR-18a-5p  | ANO6    | 196527 | ENSG00000177119 | validated |
| tarbase | hsa-miR-212-3p  | ZBTB34  | 403341 | ENSG00000177125 | validated |
| tarbase | hsa-miR-21-5p   | ZBTB34  | 403341 | ENSG00000177125 | validated |

|         |                 |          |        |                 |           |
|---------|-----------------|----------|--------|-----------------|-----------|
| tarbase | hsa-miR-18a-5p  | ULK1     | 8408   | ENSG00000177169 | validated |
| tarbase | hsa-miR-296-5p  | ULK1     | 8408   | ENSG00000177169 | validated |
| tarbase | hsa-miR-106b-5p | RIMKLA   | 284716 | ENSG00000177181 | validated |
| tarbase | hsa-miR-15b-5p  | RIMKLA   | 284716 | ENSG00000177181 | validated |
| tarbase | hsa-miR-106b-5p | RPS6KA3  | 6197   | ENSG00000177189 | validated |
| tarbase | hsa-miR-582-5p  | RPS6KA3  | 6197   | ENSG00000177189 | validated |
| tarbase | hsa-miR-212-3p  | B3GNT8   | 374907 | ENSG00000177191 | validated |
| tarbase | hsa-miR-192-5p  | PUS1     | 80324  | ENSG00000177192 | validated |
| tarbase | hsa-miR-15b-5p  | CHD9     | 80205  | ENSG00000177200 | validated |
| tarbase | hsa-miR-18a-5p  | CHD9     | 80205  | ENSG00000177200 | validated |
| tarbase | hsa-miR-21-5p   | CHD9     | 80205  | ENSG00000177200 | validated |
| tarbase | hsa-miR-301a-3p | CHD9     | 80205  | ENSG00000177200 | validated |
| tarbase | hsa-miR-192-5p  | ZBTB38   | 253461 | ENSG00000177311 | validated |
| tarbase | hsa-miR-301a-3p | ZBTB38   | 253461 | ENSG00000177311 | validated |
| tarbase | hsa-miR-212-3p  | C10orf71 | 118461 | ENSG00000177354 | validated |
| tarbase | hsa-miR-106b-5p | MAGEF1   | 64110  | ENSG00000177383 | validated |
| tarbase | hsa-miR-212-3p  | SAMD9L   | 219285 | ENSG00000177409 | validated |
| tarbase | hsa-miR-181a-5p | PAWR     | 5074   | ENSG00000177425 | validated |
| tarbase | hsa-miR-582-3p  | PAWR     | 5074   | ENSG00000177425 | validated |
| tarbase | hsa-miR-15b-5p  | TGIF1    | 7050   | ENSG00000177426 | validated |
| tarbase | hsa-miR-212-3p  | ERICH5   | 203111 | ENSG00000177459 | validated |
| tarbase | hsa-miR-181a-5p | NR2C2    | 7182   | ENSG00000177463 | validated |
| tarbase | hsa-miR-212-3p  | NR2C2    | 7182   | ENSG00000177463 | validated |
| tarbase | hsa-miR-21-5p   | ARIH2    | 10425  | ENSG00000177479 | validated |
| tarbase | hsa-miR-222-3p  | ZBTB33   | 10009  | ENSG00000177485 | validated |
| tarbase | hsa-miR-326     | ZBTB33   | 10009  | ENSG00000177485 | validated |
| tarbase | hsa-miR-582-5p  | ZBTB33   | 10009  | ENSG00000177485 | validated |
| tarbase | hsa-miR-15b-5p  | ST8SIA3  | 51046  | ENSG00000177511 | validated |
| tarbase | hsa-miR-181a-5p | RPRM     | 56475  | ENSG00000177519 | validated |
| tarbase | hsa-miR-21-5p   | SLC25A22 | 79751  | ENSG00000177542 | validated |
| tarbase | hsa-miR-106b-5p | NHLH2    | 4808   | ENSG00000177551 | validated |
| tarbase | hsa-miR-222-3p  | NHLH2    | 4808   | ENSG00000177551 | validated |
| tarbase | hsa-miR-15b-5p  | ATOX1    | 475    | ENSG00000177556 | validated |
| tarbase | hsa-miR-301a-3p | TBL1XR1  | 79718  | ENSG00000177565 | validated |
| tarbase | hsa-miR-582-3p  | TBL1XR1  | 79718  | ENSG00000177565 | validated |
| tarbase | hsa-miR-212-3p  | TBL1XR1  | 79718  | ENSG00000177565 | validated |
| tarbase | hsa-miR-18a-5p  | SAMD12   | 401474 | ENSG00000177570 | validated |
| tarbase | hsa-miR-222-3p  | C18orf32 | 497661 | ENSG00000177576 | validated |
| tarbase | hsa-miR-15b-5p  | PIDD1    | 55367  | ENSG00000177595 | validated |
| tarbase | hsa-miR-296-5p  | PIDD1    | 55367  | ENSG00000177595 | validated |
| tarbase | hsa-miR-181a-5p | HASPIN   | 83903  | ENSG00000177602 | validated |
| tarbase | hsa-miR-144-3p  | JUN      | 3725   | ENSG00000177606 | validated |
| tarbase | hsa-miR-181a-5p | JUN      | 3725   | ENSG00000177606 | validated |
| tarbase | hsa-miR-18a-5p  | JUN      | 3725   | ENSG00000177606 | validated |
| tarbase | hsa-miR-212-3p  | JUN      | 3725   | ENSG00000177606 | validated |
| tarbase | hsa-miR-106b-5p | CSTF2T   | 23283  | ENSG00000177613 | validated |
| tarbase | hsa-miR-582-3p  | CSTF2T   | 23283  | ENSG00000177613 | validated |
| tarbase | hsa-miR-301a-3p | DNAJC28  | 54943  | ENSG00000177692 | validated |
| tarbase | hsa-miR-15b-5p  | CD151    | 977    | ENSG00000177697 | validated |
| tarbase | hsa-miR-15b-5p  | POLR2L   | 5441   | ENSG00000177700 | validated |
| tarbase | hsa-miR-15b-5p  | NECTIN3  | 25945  | ENSG00000177707 | validated |
| tarbase | hsa-miR-212-3p  | ANXA2R   | 389289 | ENSG00000177721 | validated |
| tarbase | hsa-miR-326     | FLII     | 2314   | ENSG00000177731 | validated |
| tarbase | hsa-miR-301a-3p | SOX12    | 6666   | ENSG00000177732 | validated |
| tarbase | hsa-miR-222-3p  | SOX12    | 6666   | ENSG00000177732 | validated |
| tarbase | hsa-miR-222-3p  | HNRNPA0  | 10949  | ENSG00000177733 | validated |
| tarbase | hsa-miR-181a-5p | KCNJ10   | 3766   | ENSG00000177807 | validated |
| tarbase | hsa-miR-106b-5p | ZNF518A  | 9849   | ENSG00000177853 | validated |
| tarbase | hsa-miR-21-5p   | ZNF518A  | 9849   | ENSG00000177853 | validated |
| tarbase | hsa-miR-212-3p  | SVBP     | 374969 | ENSG00000177868 | validated |
| tarbase | hsa-miR-181a-5p | AP3S1    | 1176   | ENSG00000177879 | validated |
| tarbase | hsa-miR-21-5p   | AP3S1    | 1176   | ENSG00000177879 | validated |
| tarbase | hsa-miR-181a-5p | GRB2     | 2885   | ENSG00000177885 | validated |
| tarbase | hsa-miR-301a-3p | GRB2     | 2885   | ENSG00000177885 | validated |
| tarbase | hsa-miR-106b-5p | ZBTB41   | 360023 | ENSG00000177888 | validated |
| tarbase | hsa-miR-181a-5p | ZBTB41   | 360023 | ENSG00000177888 | validated |
| tarbase | hsa-miR-192-5p  | ZBTB41   | 360023 | ENSG00000177888 | validated |
| tarbase | hsa-miR-212-3p  | ZBTB41   | 360023 | ENSG00000177888 | validated |
| tarbase | hsa-miR-181a-5p | UBE2N    | 7334   | ENSG00000177889 | validated |
| tarbase | hsa-miR-21-5p   | ZNF354C  | 30832  | ENSG00000177932 | validated |
| tarbase | hsa-miR-15b-5p  | BET1L    | 51272  | ENSG00000177951 | validated |

|         |                 |          |        |                 |           |
|---------|-----------------|----------|--------|-----------------|-----------|
| tarbase | hsa-miR-15b-5p  | RIC8A    | 60626  | ENSG00000177963 | validated |
| tarbase | hsa-miR-301a-3p | RIC8A    | 60626  | ENSG00000177963 | validated |
| tarbase | hsa-miR-21-5p   | IMP3     | 55272  | ENSG00000177971 | validated |
| tarbase | hsa-miR-212-3p  | DPY19L2  | 283417 | ENSG00000177990 | validated |
| tarbase | hsa-miR-326     | LRRRC75B | 388886 | ENSG00000178026 | validated |
| tarbase | hsa-miR-106b-5p | CALHM5   | 254228 | ENSG00000178033 | validated |
| tarbase | hsa-miR-21-5p   | IMPDH2   | 3615   | ENSG00000178035 | validated |
| tarbase | hsa-miR-192-5p  | MLF1     | 4291   | ENSG00000178053 | validated |
| tarbase | hsa-miR-15b-5p  | NDUFAF3  | 25915  | ENSG00000178057 | validated |
| tarbase | hsa-miR-15b-5p  | C2orf69  | 205327 | ENSG00000178074 | validated |
| tarbase | hsa-miR-18a-5p  | C2orf69  | 205327 | ENSG00000178074 | validated |
| tarbase | hsa-miR-212-3p  | GRAMD1C  | 54762  | ENSG00000178075 | validated |
| tarbase | hsa-miR-15b-5p  | PDE4DIP  | 9659   | ENSG00000178104 | validated |
| tarbase | hsa-miR-181a-5p | PDE4DIP  | 9659   | ENSG00000178104 | validated |
| tarbase | hsa-miR-301a-3p | PDE4DIP  | 9659   | ENSG00000178104 | validated |
| tarbase | hsa-miR-582-3p  | ZNF518B  | 85460  | ENSG00000178163 | validated |
| tarbase | hsa-miR-106b-5p | LCORL    | 254251 | ENSG00000178177 | validated |
| tarbase | hsa-miR-212-3p  | LCORL    | 254251 | ENSG00000178177 | validated |
| tarbase | hsa-miR-106b-5p | PARD6G   | 84552  | ENSG00000178184 | validated |
| tarbase | hsa-miR-192-5p  | SH2B1    | 25970  | ENSG00000178188 | validated |
| tarbase | hsa-miR-296-5p  | SH2B1    | 25970  | ENSG00000178188 | validated |
| tarbase | hsa-miR-106b-5p | POGLUT3  | 143888 | ENSG00000178202 | validated |
| tarbase | hsa-miR-15b-5p  | POGLUT3  | 143888 | ENSG00000178202 | validated |
| tarbase | hsa-miR-301a-3p | POGLUT3  | 143888 | ENSG00000178202 | validated |
| tarbase | hsa-miR-181a-5p | PLEC     | 5339   | ENSG00000178209 | validated |
| tarbase | hsa-miR-21-5p   | PLEC     | 5339   | ENSG00000178209 | validated |
| tarbase | hsa-miR-181a-5p | ZNF543   | 125919 | ENSG00000178229 | validated |
| tarbase | hsa-miR-15b-5p  | WDR6     | 11180  | ENSG00000178252 | validated |
| tarbase | hsa-miR-296-5p  | WDR6     | 11180  | ENSG00000178252 | validated |
| tarbase | hsa-miR-301a-3p | WDR6     | 11180  | ENSG00000178252 | validated |
| tarbase | hsa-miR-212-3p  | ZNF354B  | 117608 | ENSG00000178338 | validated |
| tarbase | hsa-miR-212-3p  | ZNF223   | 7766   | ENSG00000178386 | validated |
| tarbase | hsa-miR-181a-5p | BEND3    | 57673  | ENSG00000178409 | validated |
| tarbase | hsa-miR-301a-3p | BEND3    | 57673  | ENSG00000178409 | validated |
| tarbase | hsa-miR-181a-5p | KLHL11   | 55175  | ENSG00000178502 | validated |
| tarbase | hsa-miR-212-3p  | SLC25A20 | 788    | ENSG00000178537 | validated |
| tarbase | hsa-miR-106b-5p | EPM2AIP1 | 9852   | ENSG00000178567 | validated |
| tarbase | hsa-miR-212-3p  | MAF      | 4094   | ENSG00000178573 | validated |
| tarbase | hsa-miR-15b-5p  | CTNNBIP1 | 56998  | ENSG00000178585 | validated |
| tarbase | hsa-miR-301a-3p | ERN1     | 2081   | ENSG00000178607 | validated |
| tarbase | hsa-miR-106b-5p | CSRNP3   | 80034  | ENSG00000178662 | validated |
| tarbase | hsa-miR-301a-3p | CSRNP3   | 80034  | ENSG00000178662 | validated |
| tarbase | hsa-miR-212-3p  | CSRNP3   | 80034  | ENSG00000178662 | validated |
| tarbase | hsa-miR-301a-3p | SUZ12    | 23512  | ENSG00000178691 | validated |
| tarbase | hsa-miR-18a-5p  | KCTD12   | 115207 | ENSG00000178695 | validated |
| tarbase | hsa-miR-222-3p  | KCTD12   | 115207 | ENSG00000178695 | validated |
| tarbase | hsa-miR-582-5p  | KCTD12   | 115207 | ENSG00000178695 | validated |
| tarbase | hsa-miR-301a-3p | GRINA    | 2907   | ENSG00000178719 | validated |
| tarbase | hsa-miR-192-5p  | COX5A    | 9377   | ENSG00000178741 | validated |
| tarbase | hsa-miR-106b-5p | FAM219B  | 57184  | ENSG00000178761 | validated |
| tarbase | hsa-miR-212-3p  | ZHX2     | 22882  | ENSG00000178764 | validated |
| tarbase | hsa-miR-212-3p  | APOLD1   | 81575  | ENSG00000178878 | validated |
| tarbase | hsa-miR-106b-5p | DPY19L3  | 147991 | ENSG00000178904 | validated |
| tarbase | hsa-miR-106b-5p | TAF7     | 6879   | ENSG00000178913 | validated |
| tarbase | hsa-miR-15b-5p  | TAF7     | 6879   | ENSG00000178913 | validated |
| tarbase | hsa-miR-181a-5p | TAF7     | 6879   | ENSG00000178913 | validated |
| tarbase | hsa-miR-222-3p  | PFAS     | 5198   | ENSG00000178921 | validated |
| tarbase | hsa-miR-18a-5p  | ZBTB7A   | 51341  | ENSG00000178951 | validated |
| tarbase | hsa-miR-326     | ZBTB7A   | 51341  | ENSG00000178951 | validated |
| tarbase | hsa-miR-192-5p  | TUFM     | 7284   | ENSG00000178952 | validated |
| tarbase | hsa-miR-301a-3p | TUFM     | 7284   | ENSG00000178952 | validated |
| tarbase | hsa-miR-181a-5p | CTC1     | 80169  | ENSG00000178971 | validated |
| tarbase | hsa-miR-301a-3p | FBXO34   | 55030  | ENSG00000178974 | validated |
| tarbase | hsa-miR-15b-5p  | FBXO34   | 55030  | ENSG00000178974 | validated |
| tarbase | hsa-miR-15b-5p  | EIF3K    | 27335  | ENSG00000178982 | validated |
| tarbase | hsa-miR-296-5p  | EIF3K    | 27335  | ENSG00000178982 | validated |
| tarbase | hsa-miR-301a-3p | AURKB    | 9212   | ENSG00000178999 | validated |
| tarbase | hsa-miR-106b-5p | AURKB    | 9212   | ENSG00000178999 | validated |
| tarbase | hsa-miR-15b-5p  | MRFAP1   | 93621  | ENSG00000179010 | validated |
| tarbase | hsa-miR-21-5p   | MRFAP1   | 93621  | ENSG00000179010 | validated |
| tarbase | hsa-miR-296-5p  | C3orf38  | 285237 | ENSG00000179021 | validated |

|         |                 |           |           |                 |           |
|---------|-----------------|-----------|-----------|-----------------|-----------|
| tarbase | hsa-miR-21-5p   | RCC2      | 55920     | ENSG00000179051 | validated |
| tarbase | hsa-miR-301a-3p | RCC2      | 55920     | ENSG00000179051 | validated |
| tarbase | hsa-miR-212-3p  | RCC2      | 55920     | ENSG00000179051 | validated |
| tarbase | hsa-miR-192-5p  | CYC1      | 1537      | ENSG00000179091 | validated |
| tarbase | hsa-miR-301a-3p | PER1      | 5187      | ENSG00000179094 | validated |
| tarbase | hsa-miR-326     | PER1      | 5187      | ENSG00000179094 | validated |
| tarbase | hsa-miR-15b-5p  | SPTY2D1   | 144108    | ENSG00000179119 | validated |
| tarbase | hsa-miR-181a-5p | SPTY2D1   | 144108    | ENSG00000179119 | validated |
| tarbase | hsa-miR-212-3p  | SPTY2D1   | 144108    | ENSG00000179119 | validated |
| tarbase | hsa-miR-21-5p   | SPTY2D1   | 144108    | ENSG00000179119 | validated |
| tarbase | hsa-miR-301a-3p | SPTY2D1   | 144108    | ENSG00000179119 | validated |
| tarbase | hsa-miR-582-5p  | SAMD4B    | 55095     | ENSG00000179134 | validated |
| tarbase | hsa-miR-212-3p  | CYP11B2   | 1585      | ENSG00000179142 | validated |
| tarbase | hsa-miR-296-5p  | EDC3      | 80153     | ENSG00000179151 | validated |
| tarbase | hsa-miR-212-3p  | PXT1      | 222659    | ENSG00000179165 | validated |
| tarbase | hsa-miR-106b-5p | ZNF664    | 144348    | ENSG00000179195 | validated |
| tarbase | hsa-miR-15b-5p  | ZNF664    | 144348    | ENSG00000179195 | validated |
| tarbase | hsa-miR-21-5p   | ZNF664    | 144348    | ENSG00000179195 | validated |
| tarbase | hsa-miR-15b-5p  | CALR      | 811       | ENSG00000179218 | validated |
| tarbase | hsa-miR-181a-5p | CALR      | 811       | ENSG00000179218 | validated |
| tarbase | hsa-miR-301a-3p | CALR      | 811       | ENSG00000179218 | validated |
| tarbase | hsa-miR-326     | CALR      | 811       | ENSG00000179218 | validated |
| tarbase | hsa-miR-15b-5p  | MAGED1    | 9500      | ENSG00000179222 | validated |
| tarbase | hsa-miR-181a-5p | MAGED1    | 9500      | ENSG00000179222 | validated |
| tarbase | hsa-miR-222-3p  | MAGED1    | 9500      | ENSG00000179222 | validated |
| tarbase | hsa-miR-21-5p   | RAD23A    | 5886      | ENSG00000179262 | validated |
| tarbase | hsa-miR-18a-5p  | NSUN7     | 79730     | ENSG00000179299 | validated |
| tarbase | hsa-miR-212-3p  | RAB39A    | 54734     | ENSG00000179331 | validated |
| tarbase | hsa-miR-212-3p  | GATA2     | 2624      | ENSG00000179348 | validated |
| tarbase | hsa-miR-181a-5p | EGR3      | 1960      | ENSG00000179388 | validated |
| tarbase | hsa-miR-212-3p  | EGR3      | 1960      | ENSG00000179388 | validated |
| tarbase | hsa-miR-15b-5p  | GEMIN4    | 50628     | ENSG00000179409 | validated |
| tarbase | hsa-miR-301a-3p | FJX1      | 24147     | ENSG00000179431 | validated |
| tarbase | hsa-miR-15b-5p  | KLHL28    | 54813     | ENSG00000179454 | validated |
| tarbase | hsa-miR-21-5p   | KLHL28    | 54813     | ENSG00000179454 | validated |
| tarbase | hsa-miR-181a-5p | KLHL28    | 54813     | ENSG00000179454 | validated |
| tarbase | hsa-miR-181a-5p | ZBTB18    | 10472     | ENSG00000179456 | validated |
| tarbase | hsa-miR-212-3p  | ZBTB18    | 10472     | ENSG00000179456 | validated |
| tarbase | hsa-miR-582-3p  | ZBTB18    | 10472     | ENSG00000179456 | validated |
| tarbase | hsa-miR-181a-5p | C14orf28  | 122525    | ENSG00000179476 | validated |
| tarbase | hsa-miR-301a-3p | C14orf28  | 122525    | ENSG00000179476 | validated |
| tarbase | hsa-miR-212-3p  | HTR1D     | 3352      | ENSG00000179546 | validated |
| tarbase | hsa-miR-296-5p  | GCC1      | 79571     | ENSG00000179562 | validated |
| tarbase | hsa-miR-15b-5p  | GCC1      | 79571     | ENSG00000179562 | validated |
| tarbase | hsa-miR-212-3p  | ZBTB42    | 100128927 | ENSG00000179627 | validated |
| tarbase | hsa-miR-212-3p  | LACC1     | 144811    | ENSG00000179630 | validated |
| tarbase | hsa-miR-212-3p  | ARL14     | 80117     | ENSG00000179674 | validated |
| tarbase | hsa-miR-18a-5p  | PIPOX     | 51268     | ENSG00000179761 | validated |
| tarbase | hsa-miR-15b-5p  | MYADM     | 91663     | ENSG00000179820 | validated |
| tarbase | hsa-miR-18a-5p  | MYADM     | 91663     | ENSG00000179820 | validated |
| tarbase | hsa-miR-21-5p   | MROH1     | 727957    | ENSG00000179832 | validated |
| tarbase | hsa-miR-106b-5p | SERTAD2   | 9792      | ENSG00000179833 | validated |
| tarbase | hsa-miR-181a-5p | SERTAD2   | 9792      | ENSG00000179833 | validated |
| tarbase | hsa-miR-222-3p  | SERTAD2   | 9792      | ENSG00000179833 | validated |
| tarbase | hsa-miR-301a-3p | SERTAD2   | 9792      | ENSG00000179833 | validated |
| tarbase | hsa-miR-582-5p  | SERTAD2   | 9792      | ENSG00000179833 | validated |
| tarbase | hsa-miR-106b-5p | AKAP5     | 9495      | ENSG00000179841 | validated |
| tarbase | hsa-miR-15b-5p  | AKAP5     | 9495      | ENSG00000179841 | validated |
| tarbase | hsa-miR-15b-5p  | ABCA13    | 154664    | ENSG00000179869 | validated |
| tarbase | hsa-miR-181a-5p | NRXN1     | 9378      | ENSG00000179915 | validated |
| tarbase | hsa-miR-15b-5p  | C14orf119 | 55017     | ENSG00000179933 | validated |
| tarbase | hsa-miR-326     | C14orf119 | 55017     | ENSG00000179933 | validated |
| tarbase | hsa-miR-301a-3p | DCTPP1    | 79077     | ENSG00000179958 | validated |
| tarbase | hsa-miR-18a-5p  | TSHZ1     | 10194     | ENSG00000179981 | validated |
| tarbase | hsa-miR-301a-3p | TSHZ1     | 10194     | ENSG00000179981 | validated |
| tarbase | hsa-miR-181a-5p | SOCS4     | 122809    | ENSG00000180008 | validated |
| tarbase | hsa-miR-106b-5p | ZADH2     | 284273    | ENSG00000180011 | validated |
| tarbase | hsa-miR-301a-3p | MED14     | 9282      | ENSG00000180182 | validated |
| tarbase | hsa-miR-212-3p  | F2        | 2147      | ENSG00000180210 | validated |
| tarbase | hsa-miR-15b-5p  | PRKRA     | 8575      | ENSG00000180228 | validated |
| tarbase | hsa-miR-181a-5p | ZNRF2     | 223082    | ENSG00000180233 | validated |



|         |                 |          |        |                 |           |
|---------|-----------------|----------|--------|-----------------|-----------|
| tarbase | hsa-miR-582-5p  | ZNRF2    | 223082 | ENSG00000180233 | validated |
| tarbase | hsa-miR-212-3p  | RRH      | 10692  | ENSG00000180245 | validated |
| tarbase | hsa-miR-192-5p  | ZNF816   | 125893 | ENSG00000180257 | validated |
| tarbase | hsa-miR-582-3p  | ALX1     | 8092   | ENSG00000180318 | validated |
| tarbase | hsa-miR-181a-5p | TIGD2    | 166815 | ENSG00000180346 | validated |
| tarbase | hsa-miR-296-5p  | ITPRID1  | 223075 | ENSG00000180347 | validated |
| tarbase | hsa-miR-106b-5p | MTURN    | 222166 | ENSG00000180354 | validated |
| tarbase | hsa-miR-505-3p  | MTURN    | 222166 | ENSG00000180354 | validated |
| tarbase | hsa-miR-15b-5p  | MTURN    | 222166 | ENSG00000180354 | validated |
| tarbase | hsa-miR-582-5p  | ZNF609   | 23060  | ENSG00000180357 | validated |
| tarbase | hsa-miR-106b-5p | PAK2     | 5062   | ENSG00000180370 | validated |
| tarbase | hsa-miR-18a-5p  | PAK2     | 5062   | ENSG00000180370 | validated |
| tarbase | hsa-miR-21-5p   | PAK2     | 5062   | ENSG00000180370 | validated |
| tarbase | hsa-miR-106b-5p | MCFD2    | 90411  | ENSG00000180398 | validated |
| tarbase | hsa-miR-181a-5p | MCFD2    | 90411  | ENSG00000180398 | validated |
| tarbase | hsa-miR-192-5p  | MCFD2    | 90411  | ENSG00000180398 | validated |
| tarbase | hsa-miR-181a-5p | SERTM1   | 400120 | ENSG00000180440 | validated |
| tarbase | hsa-miR-301a-3p | GAS1     | 2619   | ENSG00000180447 | validated |
| tarbase | hsa-miR-181a-5p | ZNF571   | 51276  | ENSG00000180479 | validated |
| tarbase | hsa-miR-106b-5p | MIGA1    | 374986 | ENSG00000180488 | validated |
| tarbase | hsa-miR-181a-5p | MIGA1    | 374986 | ENSG00000180488 | validated |
| tarbase | hsa-miR-18a-5p  | MIGA1    | 374986 | ENSG00000180488 | validated |
| tarbase | hsa-miR-222-3p  | MIGA1    | 374986 | ENSG00000180488 | validated |
| tarbase | hsa-miR-301a-3p | MIGA1    | 374986 | ENSG00000180488 | validated |
| tarbase | hsa-miR-582-5p  | MIGA1    | 374986 | ENSG00000180488 | validated |
| tarbase | hsa-miR-192-5p  | NRIP1    | 8204   | ENSG00000180530 | validated |
| tarbase | hsa-miR-21-5p   | NRIP1    | 8204   | ENSG00000180530 | validated |
| tarbase | hsa-miR-301a-3p | NRIP1    | 8204   | ENSG00000180530 | validated |
| tarbase | hsa-miR-212-3p  | H2AC6    | 8334   | ENSG00000180573 | validated |
| tarbase | hsa-miR-505-3p  | EIF2S3B  | 255308 | ENSG00000180574 | validated |
| tarbase | hsa-miR-106b-5p | SKIDA1   | 387640 | ENSG00000180592 | validated |
| tarbase | hsa-miR-21-5p   | SKIDA1   | 387640 | ENSG00000180592 | validated |
| tarbase | hsa-miR-301a-3p | SKIDA1   | 387640 | ENSG00000180592 | validated |
| tarbase | hsa-miR-212-3p  | H2BC4    | 8347   | ENSG00000180596 | validated |
| tarbase | hsa-miR-181a-5p | PCGF5    | 84333  | ENSG00000180628 | validated |
| tarbase | hsa-miR-582-5p  | PCGF5    | 84333  | ENSG00000180628 | validated |
| tarbase | hsa-miR-15b-5p  | PCGF5    | 84333  | ENSG00000180628 | validated |
| tarbase | hsa-miR-18a-5p  | YOD1     | 55432  | ENSG00000180667 | validated |
| tarbase | hsa-miR-222-3p  | YOD1     | 55432  | ENSG00000180667 | validated |
| tarbase | hsa-miR-296-5p  | YOD1     | 55432  | ENSG00000180667 | validated |
| tarbase | hsa-miR-18a-5p  | TMEM64   | 169200 | ENSG00000180694 | validated |
| tarbase | hsa-miR-212-3p  | TMEM64   | 169200 | ENSG00000180694 | validated |
| tarbase | hsa-miR-21-5p   | TMEM64   | 169200 | ENSG00000180694 | validated |
| tarbase | hsa-miR-222-3p  | TMEM64   | 169200 | ENSG00000180694 | validated |
| tarbase | hsa-miR-582-5p  | CLRN3    | 119467 | ENSG00000180745 | validated |
| tarbase | hsa-miR-15b-5p  | GPR157   | 80045  | ENSG00000180758 | validated |
| tarbase | hsa-miR-181a-5p | GPR157   | 80045  | ENSG00000180758 | validated |
| tarbase | hsa-miR-106b-5p | SLC36A4  | 120103 | ENSG00000180773 | validated |
| tarbase | hsa-miR-18a-5p  | ZDHHC20  | 253832 | ENSG00000180776 | validated |
| tarbase | hsa-miR-301a-3p | ZDHHC20  | 253832 | ENSG00000180776 | validated |
| tarbase | hsa-miR-301a-3p | ARSJ     | 79642  | ENSG00000180801 | validated |
| tarbase | hsa-miR-181a-5p | PPA1     | 5464   | ENSG00000180817 | validated |
| tarbase | hsa-miR-18a-5p  | HOXC10   | 3226   | ENSG00000180818 | validated |
| tarbase | hsa-miR-181a-5p | ZNF443   | 10224  | ENSG00000180855 | validated |
| tarbase | hsa-miR-212-3p  | C11orf42 | 160298 | ENSG00000180878 | validated |
| tarbase | hsa-miR-181a-5p | CAPS2    | 84698  | ENSG00000180881 | validated |
| tarbase | hsa-miR-106b-5p | ZNF792   | 126375 | ENSG00000180884 | validated |
| tarbase | hsa-miR-582-5p  | SCRIB    | 23513  | ENSG00000180900 | validated |
| tarbase | hsa-miR-296-5p  | D2HGDH   | 728294 | ENSG00000180902 | validated |
| tarbase | hsa-miR-301a-3p | CMTR2    | 55783  | ENSG00000180917 | validated |
| tarbase | hsa-miR-212-3p  | FAM83H   | 286077 | ENSG00000180921 | validated |
| tarbase | hsa-miR-21-5p   | PITPNB   | 23760  | ENSG00000180957 | validated |
| tarbase | hsa-miR-505-3p  | PITPNB   | 23760  | ENSG00000180957 | validated |
| tarbase | hsa-miR-106b-5p | GPR137C  | 283554 | ENSG00000180998 | validated |
| tarbase | hsa-miR-15b-5p  | GPR137C  | 283554 | ENSG00000180998 | validated |
| tarbase | hsa-miR-181a-5p | GPR137C  | 283554 | ENSG00000180998 | validated |
| tarbase | hsa-miR-212-3p  | GPR137C  | 283554 | ENSG00000180998 | validated |
| tarbase | hsa-miR-18a-5p  | ZFP82    | 284406 | ENSG00000181007 | validated |
| tarbase | hsa-miR-106b-5p | AEN      | 64782  | ENSG00000181026 | validated |
| tarbase | hsa-miR-181a-5p | AEN      | 64782  | ENSG00000181026 | validated |
| tarbase | hsa-miR-296-5p  | AEN      | 64782  | ENSG00000181026 | validated |

|         |                 |           |        |                 |           |
|---------|-----------------|-----------|--------|-----------------|-----------|
| tarbase | hsa-miR-18a-5p  | FKRP      | 79147  | ENSG00000181027 | validated |
| tarbase | hsa-miR-106b-5p | HIGD1A    | 25994  | ENSG00000181061 | validated |
| tarbase | hsa-miR-15b-5p  | EHMT1     | 79813  | ENSG00000181090 | validated |
| tarbase | hsa-miR-18a-5p  | EHMT1     | 79813  | ENSG00000181090 | validated |
| tarbase | hsa-miR-326     | EHMT1     | 79813  | ENSG00000181090 | validated |
| tarbase | hsa-miR-212-3p  | ADIPOQ    | 9370   | ENSG00000181092 | validated |
| tarbase | hsa-miR-181a-5p | F2R       | 2149   | ENSG00000181104 | validated |
| tarbase | hsa-miR-21-5p   | F2R       | 2149   | ENSG00000181104 | validated |
| tarbase | hsa-miR-106b-5p | NPM1      | 4869   | ENSG00000181163 | validated |
| tarbase | hsa-miR-326     | NPM1      | 4869   | ENSG00000181163 | validated |
| tarbase | hsa-miR-15b-5p  | PJA1      | 64219  | ENSG00000181191 | validated |
| tarbase | hsa-miR-15b-5p  | H2AW      | 92815  | ENSG00000181218 | validated |
| tarbase | hsa-miR-15b-5p  | POLR2A    | 5430   | ENSG00000181222 | validated |
| tarbase | hsa-miR-181a-5p | POLR2A    | 5430   | ENSG00000181222 | validated |
| tarbase | hsa-miR-192-5p  | POLR2A    | 5430   | ENSG00000181222 | validated |
| tarbase | hsa-miR-21-5p   | POLR2A    | 5430   | ENSG00000181222 | validated |
| tarbase | hsa-miR-222-3p  | POLR2A    | 5430   | ENSG00000181222 | validated |
| tarbase | hsa-miR-106b-5p | ZNF322    | 79692  | ENSG00000181315 | validated |
| tarbase | hsa-miR-212-3p  | DDX60L    | 91351  | ENSG00000181381 | validated |
| tarbase | hsa-miR-181a-5p | ZNF678    | 339500 | ENSG00000181450 | validated |
| tarbase | hsa-miR-505-3p  | ZNF678    | 339500 | ENSG00000181450 | validated |
| tarbase | hsa-miR-144-3p  | RAP2B     | 5912   | ENSG00000181467 | validated |
| tarbase | hsa-miR-212-3p  | RAP2B     | 5912   | ENSG00000181467 | validated |
| tarbase | hsa-miR-582-3p  | RAP2B     | 5912   | ENSG00000181467 | validated |
| tarbase | hsa-miR-212-3p  | ZBTB2     | 57621  | ENSG00000181472 | validated |
| tarbase | hsa-miR-582-5p  | RNF135    | 84282  | ENSG00000181481 | validated |
| tarbase | hsa-miR-18a-5p  | SGSH      | 6448   | ENSG00000181523 | validated |
| tarbase | hsa-miR-192-5p  | SETD2     | 29072  | ENSG00000181555 | validated |
| tarbase | hsa-miR-106b-5p | MEX3D     | 399664 | ENSG00000181588 | validated |
| tarbase | hsa-miR-15b-5p  | MRPS23    | 51649  | ENSG00000181610 | validated |
| tarbase | hsa-miR-181a-5p | MRPS23    | 51649  | ENSG00000181610 | validated |
| tarbase | hsa-miR-301a-3p | ZFP41     | 286128 | ENSG00000181638 | validated |
| tarbase | hsa-miR-18a-5p  | ZFP41     | 286128 | ENSG00000181638 | validated |
| tarbase | hsa-miR-582-5p  | ATG9B     | 285973 | ENSG00000181652 | validated |
| tarbase | hsa-miR-15b-5p  | GPR88     | 54112  | ENSG00000181656 | validated |
| tarbase | hsa-miR-106b-5p | ZNF875    | 284459 | ENSG00000181666 | validated |
| tarbase | hsa-miR-106b-5p | PLAG1     | 5324   | ENSG00000181690 | validated |
| tarbase | hsa-miR-18a-5p  | PLAG1     | 5324   | ENSG00000181690 | validated |
| tarbase | hsa-miR-21-5p   | PLAG1     | 5324   | ENSG00000181690 | validated |
| tarbase | hsa-miR-106b-5p | YIPF6     | 286451 | ENSG00000181704 | validated |
| tarbase | hsa-miR-18a-5p  | YIPF6     | 286451 | ENSG00000181704 | validated |
| tarbase | hsa-miR-15b-5p  | DIPK2A    | 205428 | ENSG00000181744 | validated |
| tarbase | hsa-miR-301a-3p | DIPK2A    | 205428 | ENSG00000181744 | validated |
| tarbase | hsa-miR-106b-5p | C5orf30   | 90355  | ENSG00000181751 | validated |
| tarbase | hsa-miR-15b-5p  | C5orf30   | 90355  | ENSG00000181751 | validated |
| tarbase | hsa-miR-181a-5p | C5orf30   | 90355  | ENSG00000181751 | validated |
| tarbase | hsa-miR-301a-3p | C5orf30   | 90355  | ENSG00000181751 | validated |
| tarbase | hsa-miR-15b-5p  | AMIGO1    | 57463  | ENSG00000181754 | validated |
| tarbase | hsa-miR-144-3p  | SIAH2     | 6478   | ENSG00000181788 | validated |
| tarbase | hsa-miR-106b-5p | SIAH2     | 6478   | ENSG00000181788 | validated |
| tarbase | hsa-miR-296-5p  | COPG1     | 22820  | ENSG00000181789 | validated |
| tarbase | hsa-miR-192-5p  | RFX7      | 64864  | ENSG00000181827 | validated |
| tarbase | hsa-miR-21-5p   | RFX7      | 64864  | ENSG00000181827 | validated |
| tarbase | hsa-miR-222-3p  | RFX7      | 64864  | ENSG00000181827 | validated |
| tarbase | hsa-miR-326     | RFX7      | 64864  | ENSG00000181827 | validated |
| tarbase | hsa-miR-212-3p  | RFX7      | 64864  | ENSG00000181827 | validated |
| tarbase | hsa-miR-181a-5p | RFX7      | 64864  | ENSG00000181827 | validated |
| tarbase | hsa-miR-301a-3p | RNF41     | 10193  | ENSG00000181852 | validated |
| tarbase | hsa-miR-326     | IBA57     | 200205 | ENSG00000181873 | validated |
| tarbase | hsa-miR-21-5p   | CLDN7     | 1366   | ENSG00000181885 | validated |
| tarbase | hsa-miR-181a-5p | ZNF101    | 94039  | ENSG00000181896 | validated |
| tarbase | hsa-miR-106b-5p | C5orf24   | 134553 | ENSG00000181904 | validated |
| tarbase | hsa-miR-15b-5p  | C5orf24   | 134553 | ENSG00000181904 | validated |
| tarbase | hsa-miR-181a-5p | C5orf24   | 134553 | ENSG00000181904 | validated |
| tarbase | hsa-miR-582-5p  | C5orf24   | 134553 | ENSG00000181904 | validated |
| tarbase | hsa-miR-21-5p   | C5orf24   | 134553 | ENSG00000181904 | validated |
| tarbase | hsa-miR-212-3p  | LINC02724 |        | ENSG00000181908 | validated |
| tarbase | hsa-miR-106b-5p | ADO       | 84890  | ENSG00000181915 | validated |
| tarbase | hsa-miR-181a-5p | ADO       | 84890  | ENSG00000181915 | validated |
| tarbase | hsa-miR-15b-5p  | PRKAG1    | 5571   | ENSG00000181929 | validated |
| tarbase | hsa-miR-212-3p  | RTKN2     | 219790 | ENSG00000182010 | validated |

|         |                 |          |           |                 |           |
|---------|-----------------|----------|-----------|-----------------|-----------|
| tarbase | hsa-miR-296-5p  | TMEM259  | 91304     | ENSG00000182087 | validated |
| tarbase | hsa-miR-222-3p  | TNRC18   | 84629     | ENSG00000182095 | validated |
| tarbase | hsa-miR-296-5p  | TNRC18   | 84629     | ENSG00000182095 | validated |
| tarbase | hsa-miR-301a-3p | TNRC18   | 84629     | ENSG00000182095 | validated |
| tarbase | hsa-miR-15b-5p  | FAM181B  | 220382    | ENSG00000182103 | validated |
| tarbase | hsa-miR-18a-5p  | ZNF716   | 441234    | ENSG00000182111 | validated |
| tarbase | hsa-miR-21-5p   | FAM89A   | 375061    | ENSG00000182118 | validated |
| tarbase | hsa-miR-192-5p  | ZNF708   | 7562      | ENSG00000182141 | validated |
| tarbase | hsa-miR-582-5p  | ZNF708   | 7562      | ENSG00000182141 | validated |
| tarbase | hsa-miR-15b-5p  | IST1     | 9798      | ENSG00000182149 | validated |
| tarbase | hsa-miR-582-5p  | ERCC6L2  | 375748    | ENSG00000182150 | validated |
| tarbase | hsa-miR-181a-5p | ERCC6L2  | 375748    | ENSG00000182150 | validated |
| tarbase | hsa-miR-192-5p  | CREB3L2  | 64764     | ENSG00000182158 | validated |
| tarbase | hsa-miR-582-3p  | CREB3L2  | 64764     | ENSG00000182158 | validated |
| tarbase | hsa-miR-106b-5p | CREB3L2  | 64764     | ENSG00000182158 | validated |
| tarbase | hsa-miR-222-3p  | UNC5C    | 8633      | ENSG00000182168 | validated |
| tarbase | hsa-miR-106b-5p | RGMA     | 56963     | ENSG00000182175 | validated |
| tarbase | hsa-miR-296-5p  | SHMT2    | 6472      | ENSG00000182199 | validated |
| tarbase | hsa-miR-144-3p  | ATP6AP2  | 10159     | ENSG00000182220 | validated |
| tarbase | hsa-miR-181a-5p | ATP6AP2  | 10159     | ENSG00000182220 | validated |
| tarbase | hsa-miR-582-5p  | ATP6AP2  | 10159     | ENSG00000182220 | validated |
| tarbase | hsa-miR-181a-5p | BACE2    | 25825     | ENSG00000182240 | validated |
| tarbase | hsa-miR-222-3p  | BACE2    | 25825     | ENSG00000182240 | validated |
| tarbase | hsa-miR-212-3p  | UBE2E2   | 7325      | ENSG00000182247 | validated |
| tarbase | hsa-miR-106b-5p | SYNM     | 23336     | ENSG00000182253 | validated |
| tarbase | hsa-miR-181a-5p | FIGN     | 55137     | ENSG00000182263 | validated |
| tarbase | hsa-miR-582-3p  | FIGN     | 55137     | ENSG00000182263 | validated |
| tarbase | hsa-miR-212-3p  | FIGN     | 55137     | ENSG00000182263 | validated |
| tarbase | hsa-miR-296-5p  | B4GALNT4 | 338707    | ENSG00000182272 | validated |
| tarbase | hsa-miR-301a-3p | AP1S2    | 8905      | ENSG00000182287 | validated |
| tarbase | hsa-miR-181a-5p | C8orf33  | 65265     | ENSG00000182307 | validated |
| tarbase | hsa-miR-296-5p  | ZSCAN22  | 342945    | ENSG00000182318 | validated |
| tarbase | hsa-miR-296-5p  | FBXL6    | 26233     | ENSG00000182325 | validated |
| tarbase | hsa-miR-582-5p  | KBTBD3   | 143879    | ENSG00000182359 | validated |
| tarbase | hsa-miR-212-3p  | KBTBD3   | 143879    | ENSG00000182359 | validated |
| tarbase | hsa-miR-181a-5p | CACNB4   | 785       | ENSG00000182389 | validated |
| tarbase | hsa-miR-18a-5p  | CACNB4   | 785       | ENSG00000182389 | validated |
| tarbase | hsa-miR-212-3p  | IFNL1    | 282618    | ENSG00000182393 | validated |
| tarbase | hsa-miR-222-3p  | PGBD4    | 161779    | ENSG00000182405 | validated |
| tarbase | hsa-miR-15b-5p  | NPLOC4   | 55666     | ENSG00000182446 | validated |
| tarbase | hsa-miR-582-3p  | TEX19    | 400629    | ENSG00000182459 | validated |
| tarbase | hsa-miR-144-3p  | TSHZ2    | 128553    | ENSG00000182463 | validated |
| tarbase | hsa-miR-296-5p  | CAPN12   | 147968    | ENSG00000182472 | validated |
| tarbase | hsa-miR-296-5p  | EXOC7    | 23265     | ENSG00000182473 | validated |
| tarbase | hsa-miR-21-5p   | KPNA2    | 3838      | ENSG00000182481 | validated |
| tarbase | hsa-miR-301a-3p | KPNA2    | 3838      | ENSG00000182481 | validated |
| tarbase | hsa-miR-181a-5p | CEP97    | 79598     | ENSG00000182504 | validated |
| tarbase | hsa-miR-301a-3p | CEP97    | 79598     | ENSG00000182504 | validated |
| tarbase | hsa-miR-326     | MXRA7    | 439921    | ENSG00000182534 | validated |
| tarbase | hsa-miR-15b-5p  | MFSD5    | 84975     | ENSG00000182544 | validated |
| tarbase | hsa-miR-212-3p  | MFSD5    | 84975     | ENSG00000182544 | validated |
| tarbase | hsa-miR-18a-5p  | SATB1    | 6304      | ENSG00000182568 | validated |
| tarbase | hsa-miR-222-3p  | SATB1    | 6304      | ENSG00000182568 | validated |
| tarbase | hsa-miR-212-3p  | SATB1    | 6304      | ENSG00000182568 | validated |
| tarbase | hsa-miR-181a-5p | TRAK1    | 22906     | ENSG00000182606 | validated |
| tarbase | hsa-miR-15b-5p  | SKA2     | 348235    | ENSG00000182628 | validated |
| tarbase | hsa-miR-181a-5p | SKA2     | 348235    | ENSG00000182628 | validated |
| tarbase | hsa-miR-21-5p   | SKA2     | 348235    | ENSG00000182628 | validated |
| tarbase | hsa-miR-106b-5p | NDN      | 4692      | ENSG00000182636 | validated |
| tarbase | hsa-miR-15b-5p  | TTC3     | 7267      | ENSG00000182670 | validated |
| tarbase | hsa-miR-301a-3p | TTC3     | 7267      | ENSG00000182670 | validated |
| tarbase | hsa-miR-582-5p  | IGIP     | 492311    | ENSG00000182700 | validated |
| tarbase | hsa-miR-301a-3p | TSKU     | 25987     | ENSG00000182704 | validated |
| tarbase | hsa-miR-15b-5p  | CMC4     | 100272147 | ENSG00000182712 | validated |
| tarbase | hsa-miR-212-3p  | ANXA2    | 302       | ENSG00000182718 | validated |
| tarbase | hsa-miR-296-5p  | HOXB4    | 3214      | ENSG00000182742 | validated |
| tarbase | hsa-miR-582-3p  | SLC35D3  | 340146    | ENSG00000182747 | validated |
| tarbase | hsa-miR-15b-5p  | PAPPA    | 5069      | ENSG00000182752 | validated |
| tarbase | hsa-miR-21-5p   | PAPPA    | 5069      | ENSG00000182752 | validated |
| tarbase | hsa-miR-192-5p  | NGRN     | 51335     | ENSG00000182768 | validated |
| tarbase | hsa-miR-301a-3p | ACBD3    | 64746     | ENSG00000182827 | validated |

|         |                 |          |        |                 |           |
|---------|-----------------|----------|--------|-----------------|-----------|
| tarbase | hsa-miR-106b-5p | C16orf72 | 29035  | ENSG00000182831 | validated |
| tarbase | hsa-miR-181a-5p | C16orf72 | 29035  | ENSG00000182831 | validated |
| tarbase | hsa-miR-212-3p  | C16orf72 | 29035  | ENSG00000182831 | validated |
| tarbase | hsa-miR-222-3p  | C16orf72 | 29035  | ENSG00000182831 | validated |
| tarbase | hsa-miR-301a-3p | C16orf72 | 29035  | ENSG00000182831 | validated |
| tarbase | hsa-miR-212-3p  | SLC25A18 | 83733  | ENSG00000182902 | validated |
| tarbase | hsa-miR-212-3p  | C11orf54 | 28970  | ENSG00000182919 | validated |
| tarbase | hsa-miR-296-5p  | CEP63    | 80254  | ENSG00000182923 | validated |
| tarbase | hsa-miR-212-3p  | CEP63    | 80254  | ENSG00000182923 | validated |
| tarbase | hsa-miR-326     | SRPRA    | 6734   | ENSG00000182934 | validated |
| tarbase | hsa-miR-181a-5p | EWSR1    | 2130   | ENSG00000182944 | validated |
| tarbase | hsa-miR-582-3p  | EWSR1    | 2130   | ENSG00000182944 | validated |
| tarbase | hsa-miR-18a-5p  | SPATA13  | 221178 | ENSG00000182957 | validated |
| tarbase | hsa-miR-296-5p  | SPATA13  | 221178 | ENSG00000182957 | validated |
| tarbase | hsa-miR-181a-5p | MTA1     | 9112   | ENSG00000182979 | validated |
| tarbase | hsa-miR-181a-5p | CADM1    | 23705  | ENSG00000182985 | validated |
| tarbase | hsa-miR-18a-5p  | ZNF320   | 162967 | ENSG00000182986 | validated |
| tarbase | hsa-miR-15b-5p  | NAA38    | 84316  | ENSG00000183011 | validated |
| tarbase | hsa-miR-181a-5p | SLC8A1   | 6546   | ENSG00000183023 | validated |
| tarbase | hsa-miR-212-3p  | SLC25A21 | 89874  | ENSG00000183032 | validated |
| tarbase | hsa-miR-106b-5p | ABAT     | 18     | ENSG00000183044 | validated |
| tarbase | hsa-miR-21-5p   | ABAT     | 18     | ENSG00000183044 | validated |
| tarbase | hsa-miR-301a-3p | FANCF    | 2188   | ENSG00000183161 | validated |
| tarbase | hsa-miR-212-3p  | FANCF    | 2188   | ENSG00000183161 | validated |
| tarbase | hsa-miR-181a-5p | GDPGP1   | 390637 | ENSG00000183208 | validated |
| tarbase | hsa-miR-15b-5p  | PTTG1IP  | 754    | ENSG00000183255 | validated |
| tarbase | hsa-miR-582-5p  | PTTG1IP  | 754    | ENSG00000183255 | validated |
| tarbase | hsa-miR-106b-5p | DAZAP2   | 9802   | ENSG00000183283 | validated |
| tarbase | hsa-miR-18a-5p  | DAZAP2   | 9802   | ENSG00000183283 | validated |
| tarbase | hsa-miR-222-3p  | SELENOF  | 9403   | ENSG00000183291 | validated |
| tarbase | hsa-miR-144-3p  | ZNF623   | 9831   | ENSG00000183309 | validated |
| tarbase | hsa-miR-212-3p  | ZNF623   | 9831   | ENSG00000183309 | validated |
| tarbase | hsa-miR-181a-5p | ZNF623   | 9831   | ENSG00000183309 | validated |
| tarbase | hsa-miR-212-3p  | BOLA2    | 552900 | ENSG00000183336 | validated |
| tarbase | hsa-miR-106b-5p | BCOR     | 54880  | ENSG00000183337 | validated |
| tarbase | hsa-miR-222-3p  | BCOR     | 54880  | ENSG00000183337 | validated |
| tarbase | hsa-miR-582-5p  | BCOR     | 54880  | ENSG00000183337 | validated |
| tarbase | hsa-miR-106b-5p | JRKL     | 8690   | ENSG00000183340 | validated |
| tarbase | hsa-miR-181a-5p | KIAA2026 | 158358 | ENSG00000183354 | validated |
| tarbase | hsa-miR-144-3p  | RIPK4    | 54101  | ENSG00000183421 | validated |
| tarbase | hsa-miR-301a-3p | RIPK4    | 54101  | ENSG00000183421 | validated |
| tarbase | hsa-miR-212-3p  | SF3A3    | 10946  | ENSG00000183431 | validated |
| tarbase | hsa-miR-326     | SF3A3    | 10946  | ENSG00000183431 | validated |
| tarbase | hsa-miR-18a-5p  | GRIN2A   | 2903   | ENSG00000183454 | validated |
| tarbase | hsa-miR-181a-5p | GRIN2A   | 2903   | ENSG00000183454 | validated |
| tarbase | hsa-miR-18a-5p  | MEX3B    | 84206  | ENSG00000183496 | validated |
| tarbase | hsa-miR-21-5p   | TENT5C   | 54855  | ENSG00000183508 | validated |
| tarbase | hsa-miR-106b-5p | COA5     | 493753 | ENSG00000183513 | validated |
| tarbase | hsa-miR-582-5p  | UTP11    | 51118  | ENSG00000183520 | validated |
| tarbase | hsa-miR-15b-5p  | PRR14L   | 253143 | ENSG00000183530 | validated |
| tarbase | hsa-miR-181a-5p | PRR14L   | 253143 | ENSG00000183530 | validated |
| tarbase | hsa-miR-181a-5p | FBXL7    | 23194  | ENSG00000183580 | validated |
| tarbase | hsa-miR-181a-5p | SFXN4    | 119559 | ENSG00000183605 | validated |
| tarbase | hsa-miR-212-3p  | FAM167B  | 84734  | ENSG00000183615 | validated |
| tarbase | hsa-miR-181a-5p | ZNF530   | 348327 | ENSG00000183647 | validated |
| tarbase | hsa-miR-212-3p  | TRMT12   | 55039  | ENSG00000183665 | validated |
| tarbase | hsa-miR-18a-5p  | ALYREF   | 10189  | ENSG00000183684 | validated |
| tarbase | hsa-miR-326     | ALYREF   | 10189  | ENSG00000183684 | validated |
| tarbase | hsa-miR-212-3p  | UPP1     | 7378   | ENSG00000183696 | validated |
| tarbase | hsa-miR-212-3p  | IFNL2    | 282616 | ENSG00000183709 | validated |
| tarbase | hsa-miR-181a-5p | TBK1     | 29110  | ENSG00000183735 | validated |
| tarbase | hsa-miR-21-5p   | TBK1     | 29110  | ENSG00000183735 | validated |
| tarbase | hsa-miR-106b-5p | CBX6     | 23466  | ENSG00000183741 | validated |
| tarbase | hsa-miR-192-5p  | CBX6     | 23466  | ENSG00000183741 | validated |
| tarbase | hsa-miR-296-5p  | CBX6     | 23466  | ENSG00000183741 | validated |
| tarbase | hsa-miR-301a-3p | CBX6     | 23466  | ENSG00000183741 | validated |
| tarbase | hsa-miR-505-3p  | CBX6     | 23466  | ENSG00000183741 | validated |
| tarbase | hsa-miR-582-3p  | CBX6     | 23466  | ENSG00000183741 | validated |
| tarbase | hsa-miR-106b-5p | MACC1    | 346389 | ENSG00000183742 | validated |
| tarbase | hsa-miR-15b-5p  | TBL3     | 10607  | ENSG00000183751 | validated |
| tarbase | hsa-miR-212-3p  | CHEK2    | 11200  | ENSG00000183765 | validated |

|         |                 |          |           |                 |           |
|---------|-----------------|----------|-----------|-----------------|-----------|
| tarbase | hsa-miR-15b-5p  | KCTD16   | 57528     | ENSG00000183775 | validated |
| tarbase | hsa-miR-181a-5p | KCTD16   | 57528     | ENSG00000183775 | validated |
| tarbase | hsa-miR-181a-5p | ZNF703   | 80139     | ENSG00000183779 | validated |
| tarbase | hsa-miR-212-3p  | ZNF703   | 80139     | ENSG00000183779 | validated |
| tarbase | hsa-miR-296-5p  | ZNF703   | 80139     | ENSG00000183779 | validated |
| tarbase | hsa-miR-106b-5p | ZNF703   | 80139     | ENSG00000183779 | validated |
| tarbase | hsa-miR-301a-3p | TUBA8    | 51807     | ENSG00000183785 | validated |
| tarbase | hsa-miR-212-3p  | RBM12B   | 389677    | ENSG00000183808 | validated |
| tarbase | hsa-miR-21-5p   | RBM12B   | 389677    | ENSG00000183808 | validated |
| tarbase | hsa-miR-301a-3p | RBM12B   | 389677    | ENSG00000183808 | validated |
| tarbase | hsa-miR-212-3p  | CCR4     | 1233      | ENSG00000183813 | validated |
| tarbase | hsa-miR-15b-5p  | BTBD9    | 114781    | ENSG00000183826 | validated |
| tarbase | hsa-miR-181a-5p | ZNF730   | 100129543 | ENSG00000183850 | validated |
| tarbase | hsa-miR-106b-5p | KIRREL1  | 55243     | ENSG00000183853 | validated |
| tarbase | hsa-miR-18a-5p  | IQGAP3   | 128239    | ENSG00000183856 | validated |
| tarbase | hsa-miR-301a-3p | TOB2     | 10766     | ENSG00000183864 | validated |
| tarbase | hsa-miR-106b-5p | TOB2     | 10766     | ENSG00000183864 | validated |
| tarbase | hsa-miR-212-3p  | SCN5A    | 6331      | ENSG00000183873 | validated |
| tarbase | hsa-miR-212-3p  | PRKX     | 5613      | ENSG00000183943 | validated |
| tarbase | hsa-miR-181a-5p | KMT5A    | 387893    | ENSG00000183955 | validated |
| tarbase | hsa-miR-106b-5p | KCNH8    | 131096    | ENSG00000183960 | validated |
| tarbase | hsa-miR-15b-5p  | SMTN     | 6525      | ENSG00000183963 | validated |
| tarbase | hsa-miR-15b-5p  | PTP4A2   | 8073      | ENSG00000184007 | validated |
| tarbase | hsa-miR-21-5p   | PTP4A2   | 8073      | ENSG00000184007 | validated |
| tarbase | hsa-miR-15b-5p  | ACTG1    | 71        | ENSG00000184009 | validated |
| tarbase | hsa-miR-212-3p  | ACTG1    | 71        | ENSG00000184009 | validated |
| tarbase | hsa-miR-582-3p  | ACTG1    | 71        | ENSG00000184009 | validated |
| tarbase | hsa-miR-326     | DENND5A  | 23258     | ENSG00000184014 | validated |
| tarbase | hsa-miR-21-5p   | DENND5A  | 23258     | ENSG00000184014 | validated |
| tarbase | hsa-miR-144-3p  | TBX1     | 6899      | ENSG00000184058 | validated |
| tarbase | hsa-miR-301a-3p | UQCR10   | 29796     | ENSG00000184076 | validated |
| tarbase | hsa-miR-212-3p  | EIF3C    | 8663      | ENSG00000184110 | validated |
| tarbase | hsa-miR-181a-5p | KCNQ3    | 3786      | ENSG00000184156 | validated |
| tarbase | hsa-miR-106b-5p | NR2C2AP  | 126382    | ENSG00000184162 | validated |
| tarbase | hsa-miR-222-3p  | NR2C2AP  | 126382    | ENSG00000184162 | validated |
| tarbase | hsa-miR-301a-3p | NR2C2AP  | 126382    | ENSG00000184162 | validated |
| tarbase | hsa-miR-15b-5p  | PPP1R2   | 5504      | ENSG00000184203 | validated |
| tarbase | hsa-miR-222-3p  | PPP1R2   | 5504      | ENSG00000184203 | validated |
| tarbase | hsa-miR-582-5p  | PPP1R2   | 5504      | ENSG00000184203 | validated |
| tarbase | hsa-miR-15b-5p  | TSPYL2   | 64061     | ENSG00000184205 | validated |
| tarbase | hsa-miR-181a-5p | GOLGA6L4 | 643707    | ENSG00000184206 | validated |
| tarbase | hsa-miR-296-5p  | IRAK1    | 3654      | ENSG00000184216 | validated |
| tarbase | hsa-miR-212-3p  | IRAK1    | 3654      | ENSG00000184216 | validated |
| tarbase | hsa-miR-15b-5p  | IRAK1    | 3654      | ENSG00000184216 | validated |
| tarbase | hsa-miR-212-3p  | OLIG1    | 116448    | ENSG00000184221 | validated |
| tarbase | hsa-miR-15b-5p  | PCDH9    | 5101      | ENSG00000184226 | validated |
| tarbase | hsa-miR-181a-5p | PCDH9    | 5101      | ENSG00000184226 | validated |
| tarbase | hsa-miR-296-5p  | OAF      | 220323    | ENSG00000184232 | validated |
| tarbase | hsa-miR-15b-5p  | ALDH1A3  | 220       | ENSG00000184254 | validated |
| tarbase | hsa-miR-106b-5p | POU6F1   | 5463      | ENSG00000184271 | validated |
| tarbase | hsa-miR-15b-5p  | TACSTD2  | 4070      | ENSG00000184292 | validated |
| tarbase | hsa-miR-181a-5p | TACSTD2  | 4070      | ENSG00000184292 | validated |
| tarbase | hsa-miR-212-3p  | PRKD1    | 5587      | ENSG00000184304 | validated |
| tarbase | hsa-miR-15b-5p  | CCSER1   | 401145    | ENSG00000184305 | validated |
| tarbase | hsa-miR-222-3p  | CCSER1   | 401145    | ENSG00000184305 | validated |
| tarbase | hsa-miR-15b-5p  | ZDHHC23  | 254887    | ENSG00000184307 | validated |
| tarbase | hsa-miR-301a-3p | ZDHHC23  | 254887    | ENSG00000184307 | validated |
| tarbase | hsa-miR-21-5p   | H1-5     | 3009      | ENSG00000184357 | validated |
| tarbase | hsa-miR-212-3p  | MAP7D2   | 256714    | ENSG00000184368 | validated |
| tarbase | hsa-miR-181a-5p | SS18L1   | 26039     | ENSG00000184402 | validated |
| tarbase | hsa-miR-21-5p   | COPB2    | 9276      | ENSG00000184432 | validated |
| tarbase | hsa-miR-181a-5p | KNTC1    | 9735      | ENSG00000184445 | validated |
| tarbase | hsa-miR-301a-3p | KNTC1    | 9735      | ENSG00000184445 | validated |
| tarbase | hsa-miR-15b-5p  | CCR10    | 2826      | ENSG00000184451 | validated |
| tarbase | hsa-miR-212-3p  | POU3F2   | 5454      | ENSG00000184486 | validated |
| tarbase | hsa-miR-21-5p   | HDDC3    | 374659    | ENSG00000184508 | validated |
| tarbase | hsa-miR-15b-5p  | ZFP1     | 162239    | ENSG00000184517 | validated |
| tarbase | hsa-miR-301a-3p | CEND1    | 51286     | ENSG00000184524 | validated |
| tarbase | hsa-miR-106b-5p | DUSP8    | 1850      | ENSG00000184545 | validated |
| tarbase | hsa-miR-296-5p  | SOCS3    | 9021      | ENSG00000184557 | validated |
| tarbase | hsa-miR-326     | SOCS3    | 9021      | ENSG00000184557 | validated |

|         |                 |           |        |                 |           |
|---------|-----------------|-----------|--------|-----------------|-----------|
| tarbase | hsa-miR-212-3p  | SPEM2     | 201243 | ENSG00000184560 | validated |
| tarbase | hsa-miR-192-5p  | PIWIL3    | 440822 | ENSG00000184571 | validated |
| tarbase | hsa-miR-296-5p  | PIWIL3    | 440822 | ENSG00000184571 | validated |
| tarbase | hsa-miR-106b-5p | XPOT      | 11260  | ENSG00000184575 | validated |
| tarbase | hsa-miR-192-5p  | XPOT      | 11260  | ENSG00000184575 | validated |
| tarbase | hsa-miR-144-3p  | SNN       | 8303   | ENSG00000184602 | validated |
| tarbase | hsa-miR-21-5p   | SNN       | 8303   | ENSG00000184602 | validated |
| tarbase | hsa-miR-582-3p  | SNN       | 8303   | ENSG00000184602 | validated |
| tarbase | hsa-miR-181a-5p | SNN       | 8303   | ENSG00000184602 | validated |
| tarbase | hsa-miR-192-5p  | SEPTIN9   | 10801  | ENSG00000184640 | validated |
| tarbase | hsa-miR-106b-5p | CDCA2     | 157313 | ENSG00000184661 | validated |
| tarbase | hsa-miR-18a-5p  | CDCA2     | 157313 | ENSG00000184661 | validated |
| tarbase | hsa-miR-212-3p  | CDCA2     | 157313 | ENSG00000184661 | validated |
| tarbase | hsa-miR-296-5p  | AMER1     | 139285 | ENSG00000184675 | validated |
| tarbase | hsa-miR-144-3p  | H2BC21    | 8349   | ENSG00000184678 | validated |
| tarbase | hsa-miR-15b-5p  | SEPTIN5   | 5413   | ENSG00000184702 | validated |
| tarbase | hsa-miR-181a-5p | EIF4ENIF1 | 56478  | ENSG00000184708 | validated |
| tarbase | hsa-miR-15b-5p  | FAM110C   | 642273 | ENSG00000184731 | validated |
| tarbase | hsa-miR-301a-3p | FAM110C   | 642273 | ENSG00000184731 | validated |
| tarbase | hsa-miR-326     | DDX53     | 168400 | ENSG00000184735 | validated |
| tarbase | hsa-miR-15b-5p  | ATL3      | 25923  | ENSG00000184743 | validated |
| tarbase | hsa-miR-181a-5p | ATL3      | 25923  | ENSG00000184743 | validated |
| tarbase | hsa-miR-212-3p  | ATL3      | 25923  | ENSG00000184743 | validated |
| tarbase | hsa-miR-21-5p   | ATL3      | 25923  | ENSG00000184743 | validated |
| tarbase | hsa-miR-222-3p  | ATL3      | 25923  | ENSG00000184743 | validated |
| tarbase | hsa-miR-582-3p  | NDUFA12   | 55967  | ENSG00000184752 | validated |
| tarbase | hsa-miR-212-3p  | TRARG1    | 286753 | ENSG00000184811 | validated |
| tarbase | hsa-miR-106b-5p | RBM33     | 155435 | ENSG00000184863 | validated |
| tarbase | hsa-miR-301a-3p | RBM33     | 155435 | ENSG00000184863 | validated |
| tarbase | hsa-miR-15b-5p  | ARMCX2    | 9823   | ENSG00000184867 | validated |
| tarbase | hsa-miR-15b-5p  | BTBD6     | 90135  | ENSG00000184887 | validated |
| tarbase | hsa-miR-222-3p  | H1-10     | 8971   | ENSG00000184897 | validated |
| tarbase | hsa-miR-15b-5p  | SUMO3     | 6612   | ENSG00000184900 | validated |
| tarbase | hsa-miR-181a-5p | IMMP2L    | 83943  | ENSG00000184903 | validated |
| tarbase | hsa-miR-181a-5p | ZFP90     | 146198 | ENSG00000184939 | validated |
| tarbase | hsa-miR-181a-5p | USP18     | 11274  | ENSG00000184979 | validated |
| tarbase | hsa-miR-212-3p  | USP18     | 11274  | ENSG00000184979 | validated |
| tarbase | hsa-miR-15b-5p  | TMEM121   | 80757  | ENSG00000184986 | validated |
| tarbase | hsa-miR-18a-5p  | TMEM121   | 80757  | ENSG00000184986 | validated |
| tarbase | hsa-miR-181a-5p | SIVA1     | 10572  | ENSG00000184990 | validated |
| tarbase | hsa-miR-15b-5p  | BRI3BP    | 140707 | ENSG00000184992 | validated |
| tarbase | hsa-miR-505-3p  | BRI3BP    | 140707 | ENSG00000184992 | validated |
| tarbase | hsa-miR-18a-5p  | DGAT1     | 8694   | ENSG00000185000 | validated |
| tarbase | hsa-miR-212-3p  | RFX6      | 222546 | ENSG00000185002 | validated |
| tarbase | hsa-miR-192-5p  | RFX6      | 222546 | ENSG00000185002 | validated |
| tarbase | hsa-miR-212-3p  | ROBO2     | 6092   | ENSG00000185008 | validated |
| tarbase | hsa-miR-222-3p  | AP3M1     | 26985  | ENSG00000185009 | validated |
| tarbase | hsa-miR-301a-3p | AP3M1     | 26985  | ENSG00000185009 | validated |
| tarbase | hsa-miR-582-3p  | AP3M1     | 26985  | ENSG00000185009 | validated |
| tarbase | hsa-miR-181a-5p | ANKS1B    | 56899  | ENSG00000185046 | validated |
| tarbase | hsa-miR-301a-3p | SLC24A3   | 57419  | ENSG00000185052 | validated |
| tarbase | hsa-miR-18a-5p  | MANEAL    | 149175 | ENSG00000185090 | validated |
| tarbase | hsa-miR-212-3p  | FAM43A    | 131583 | ENSG00000185112 | validated |
| tarbase | hsa-miR-15b-5p  | NSMCE3    | 56160  | ENSG00000185115 | validated |
| tarbase | hsa-miR-192-5p  | C6orf120  | 387263 | ENSG00000185127 | validated |
| tarbase | hsa-miR-301a-3p | PURA      | 5813   | ENSG00000185129 | validated |
| tarbase | hsa-miR-582-5p  | PURA      | 5813   | ENSG00000185129 | validated |
| tarbase | hsa-miR-181a-5p | PURA      | 5813   | ENSG00000185129 | validated |
| tarbase | hsa-miR-18a-5p  | DDX51     | 317781 | ENSG00000185163 | validated |
| tarbase | hsa-miR-106b-5p | IFITM2    | 10581  | ENSG00000185201 | validated |
| tarbase | hsa-miR-212-3p  | IFITM2    | 10581  | ENSG00000185201 | validated |
| tarbase | hsa-miR-192-5p  | TNFAIP2   | 7127   | ENSG00000185215 | validated |
| tarbase | hsa-miR-106b-5p | ZNF445    | 353274 | ENSG00000185219 | validated |
| tarbase | hsa-miR-181a-5p | PRPF39    | 55015  | ENSG00000185246 | validated |
| tarbase | hsa-miR-212-3p  | UBALD2    | 283991 | ENSG00000185262 | validated |
| tarbase | hsa-miR-212-3p  | CDNF      | 441549 | ENSG00000185267 | validated |
| tarbase | hsa-miR-181a-5p | ZBTB37    | 84614  | ENSG00000185278 | validated |
| tarbase | hsa-miR-18a-5p  | CCDC137   | 339230 | ENSG00000185298 | validated |
| tarbase | hsa-miR-106b-5p | SOCS1     | 8651   | ENSG00000185338 | validated |
| tarbase | hsa-miR-296-5p  | GAS2L1    | 10634  | ENSG00000185340 | validated |
| tarbase | hsa-miR-212-3p  | PRKN      | 5071   | ENSG00000185345 | validated |

|         |                 |         |        |                 |           |
|---------|-----------------|---------|--------|-----------------|-----------|
| tarbase | hsa-miR-296-5p  | MAPK11  | 5600   | ENSG00000185386 | validated |
| tarbase | hsa-miR-18a-5p  | GPRIN3  | 285513 | ENSG00000185477 | validated |
| tarbase | hsa-miR-18a-5p  | PARPBP  | 55010  | ENSG00000185480 | validated |
| tarbase | hsa-miR-18a-5p  | ROR1    | 4919   | ENSG00000185483 | validated |
| tarbase | hsa-miR-296-5p  | FAAP100 | 80233  | ENSG00000185504 | validated |
| tarbase | hsa-miR-212-3p  | IRF7    | 3665   | ENSG00000185507 | validated |
| tarbase | hsa-miR-505-3p  | SV2B    | 9899   | ENSG00000185518 | validated |
| tarbase | hsa-miR-106b-5p | NR2F2   | 7026   | ENSG00000185551 | validated |
| tarbase | hsa-miR-192-5p  | NR2F2   | 7026   | ENSG00000185551 | validated |
| tarbase | hsa-miR-505-3p  | NR2F2   | 7026   | ENSG00000185551 | validated |
| tarbase | hsa-miR-181a-5p | LSAMP   | 4045   | ENSG00000185565 | validated |
| tarbase | hsa-miR-15b-5p  | SP1     | 6667   | ENSG00000185591 | validated |
| tarbase | hsa-miR-212-3p  | SP1     | 6667   | ENSG00000185591 | validated |
| tarbase | hsa-miR-301a-3p | SP1     | 6667   | ENSG00000185591 | validated |
| tarbase | hsa-miR-18a-5p  | PCGF3   | 10336  | ENSG00000185619 | validated |
| tarbase | hsa-miR-212-3p  | LMLN    | 89782  | ENSG00000185621 | validated |
| tarbase | hsa-miR-18a-5p  | P4HB    | 5034   | ENSG00000185624 | validated |
| tarbase | hsa-miR-326     | P4HB    | 5034   | ENSG00000185624 | validated |
| tarbase | hsa-miR-181a-5p | PBX1    | 5087   | ENSG00000185630 | validated |
| tarbase | hsa-miR-18a-5p  | ZFP36L1 | 677    | ENSG00000185650 | validated |
| tarbase | hsa-miR-21-5p   | ZFP36L1 | 677    | ENSG00000185650 | validated |
| tarbase | hsa-miR-222-3p  | ZFP36L1 | 677    | ENSG00000185650 | validated |
| tarbase | hsa-miR-15b-5p  | BRWD1   | 54014  | ENSG00000185658 | validated |
| tarbase | hsa-miR-181a-5p | BRWD1   | 54014  | ENSG00000185658 | validated |
| tarbase | hsa-miR-18a-5p  | BRWD1   | 54014  | ENSG00000185658 | validated |
| tarbase | hsa-miR-21-5p   | BRWD1   | 54014  | ENSG00000185658 | validated |
| tarbase | hsa-miR-582-3p  | BRWD1   | 54014  | ENSG00000185658 | validated |
| tarbase | hsa-miR-106b-5p | MYBL1   | 4603   | ENSG00000185697 | validated |
| tarbase | hsa-miR-15b-5p  | MYBL1   | 4603   | ENSG00000185697 | validated |
| tarbase | hsa-miR-181a-5p | MYBL1   | 4603   | ENSG00000185697 | validated |
| tarbase | hsa-miR-222-3p  | MYBL1   | 4603   | ENSG00000185697 | validated |
| tarbase | hsa-miR-301a-3p | MYBL1   | 4603   | ENSG00000185697 | validated |
| tarbase | hsa-miR-212-3p  | MOSMO   | 730094 | ENSG00000185716 | validated |
| tarbase | hsa-miR-326     | MOSMO   | 730094 | ENSG00000185716 | validated |
| tarbase | hsa-miR-181a-5p | ANKFY1  | 51479  | ENSG00000185722 | validated |
| tarbase | hsa-miR-582-3p  | ANKFY1  | 51479  | ENSG00000185722 | validated |
| tarbase | hsa-miR-106b-5p | YTHDF3  | 253943 | ENSG00000185728 | validated |
| tarbase | hsa-miR-181a-5p | YTHDF3  | 253943 | ENSG00000185728 | validated |
| tarbase | hsa-miR-18a-5p  | YTHDF3  | 253943 | ENSG00000185728 | validated |
| tarbase | hsa-miR-212-3p  | YTHDF3  | 253943 | ENSG00000185728 | validated |
| tarbase | hsa-miR-222-3p  | YTHDF3  | 253943 | ENSG00000185728 | validated |
| tarbase | hsa-miR-212-3p  | ZNF696  | 79943  | ENSG00000185730 | validated |
| tarbase | hsa-miR-21-5p   | IFIT1   | 3434   | ENSG00000185745 | validated |
| tarbase | hsa-miR-212-3p  | IFIT1   | 3434   | ENSG00000185745 | validated |
| tarbase | hsa-miR-181a-5p | KCNQ5   | 56479  | ENSG00000185760 | validated |
| tarbase | hsa-miR-301a-3p | KCNQ5   | 56479  | ENSG00000185760 | validated |
| tarbase | hsa-miR-212-3p  | KCNQ5   | 56479  | ENSG00000185760 | validated |
| tarbase | hsa-miR-181a-5p | DMWD    | 1762   | ENSG00000185800 | validated |
| tarbase | hsa-miR-296-5p  | DMWD    | 1762   | ENSG00000185800 | validated |
| tarbase | hsa-miR-582-3p  | DMWD    | 1762   | ENSG00000185800 | validated |
| tarbase | hsa-miR-15b-5p  | NAT8L   | 339983 | ENSG00000185818 | validated |
| tarbase | hsa-miR-181a-5p | NAT8L   | 339983 | ENSG00000185818 | validated |
| tarbase | hsa-miR-582-5p  | NAT8L   | 339983 | ENSG00000185818 | validated |
| tarbase | hsa-miR-15b-5p  | DNAH14  | 127602 | ENSG00000185842 | validated |
| tarbase | hsa-miR-212-3p  | DNAH14  | 127602 | ENSG00000185842 | validated |
| tarbase | hsa-miR-301a-3p | DNAH14  | 127602 | ENSG00000185842 | validated |
| tarbase | hsa-miR-212-3p  | TRIM69  | 140691 | ENSG00000185880 | validated |
| tarbase | hsa-miR-212-3p  | IFITM1  | 8519   | ENSG00000185885 | validated |
| tarbase | hsa-miR-15b-5p  | POMK    | 84197  | ENSG00000185900 | validated |
| tarbase | hsa-miR-301a-3p | SETD4   | 54093  | ENSG00000185917 | validated |
| tarbase | hsa-miR-181a-5p | ZNF267  | 10308  | ENSG00000185947 | validated |
| tarbase | hsa-miR-582-5p  | ZNF267  | 10308  | ENSG00000185947 | validated |
| tarbase | hsa-miR-106b-5p | IRS2    | 8660   | ENSG00000185950 | validated |
| tarbase | hsa-miR-181a-5p | IRS2    | 8660   | ENSG00000185950 | validated |
| tarbase | hsa-miR-18a-5p  | BICD2   | 23299  | ENSG00000185963 | validated |
| tarbase | hsa-miR-222-3p  | BICD2   | 23299  | ENSG00000185963 | validated |
| tarbase | hsa-miR-301a-3p | BICD2   | 23299  | ENSG00000185963 | validated |
| tarbase | hsa-miR-582-5p  | BICD2   | 23299  | ENSG00000185963 | validated |
| tarbase | hsa-miR-18a-5p  | ZNF566  | 84924  | ENSG00000186017 | validated |
| tarbase | hsa-miR-181a-5p | ZNF566  | 84924  | ENSG00000186017 | validated |
| tarbase | hsa-miR-212-3p  | ZNF566  | 84924  | ENSG00000186017 | validated |

|         |                 |          |           |                 |           |
|---------|-----------------|----------|-----------|-----------------|-----------|
| tarbase | hsa-miR-181a-5p | ZNF529   | 57711     | ENSG00000186020 | validated |
| tarbase | hsa-miR-212-3p  | ZBPB2    | 124626    | ENSG00000186075 | validated |
| tarbase | hsa-miR-21-5p   | KRT5     | 3852      | ENSG00000186081 | validated |
| tarbase | hsa-miR-212-3p  | GSAP     | 54103     | ENSG00000186088 | validated |
| tarbase | hsa-miR-326     | ANKRD46  | 157567    | ENSG00000186106 | validated |
| tarbase | hsa-miR-15b-5p  | ANKRD46  | 157567    | ENSG00000186106 | validated |
| tarbase | hsa-miR-106b-5p | ANKRD46  | 157567    | ENSG00000186106 | validated |
| tarbase | hsa-miR-144-3p  | PIP5K1C  | 23396     | ENSG00000186111 | validated |
| tarbase | hsa-miR-582-5p  | PIP5K1C  | 23396     | ENSG00000186111 | validated |
| tarbase | hsa-miR-212-3p  | ZBTB6    | 10773     | ENSG00000186130 | validated |
| tarbase | hsa-miR-181a-5p | BCL9L    | 283149    | ENSG00000186174 | validated |
| tarbase | hsa-miR-181a-5p | POLR1D   | 51082     | ENSG00000186184 | validated |
| tarbase | hsa-miR-15b-5p  | KIF18B   | 146909    | ENSG00000186185 | validated |
| tarbase | hsa-miR-212-3p  | KIF18B   | 146909    | ENSG00000186185 | validated |
| tarbase | hsa-miR-301a-3p | BPIFB4   | 149954    | ENSG00000186191 | validated |
| tarbase | hsa-miR-15b-5p  | EDARADD  | 128178    | ENSG00000186197 | validated |
| tarbase | hsa-miR-212-3p  | EDARADD  | 128178    | ENSG00000186197 | validated |
| tarbase | hsa-miR-21-5p   | MARC1    | 64757     | ENSG00000186205 | validated |
| tarbase | hsa-miR-212-3p  | BLOC1S4  | 55330     | ENSG00000186222 | validated |
| tarbase | hsa-miR-301a-3p | BLOC1S4  | 55330     | ENSG00000186222 | validated |
| tarbase | hsa-miR-222-3p  | ZNF749   | 388567    | ENSG00000186230 | validated |
| tarbase | hsa-miR-212-3p  | KLHL32   | 114792    | ENSG00000186231 | validated |
| tarbase | hsa-miR-106b-5p | MRTFB    | 57496     | ENSG00000186260 | validated |
| tarbase | hsa-miR-15b-5p  | MRTFB    | 57496     | ENSG00000186260 | validated |
| tarbase | hsa-miR-582-5p  | MRTFB    | 57496     | ENSG00000186260 | validated |
| tarbase | hsa-miR-505-3p  | BTLA     | 151888    | ENSG00000186265 | validated |
| tarbase | hsa-miR-301a-3p | ZNF17    | 7565      | ENSG00000186272 | validated |
| tarbase | hsa-miR-212-3p  | ZNF17    | 7565      | ENSG00000186272 | validated |
| tarbase | hsa-miR-181a-5p | PPP1CC   | 5501      | ENSG00000186298 | validated |
| tarbase | hsa-miR-192-5p  | PPP1CC   | 5501      | ENSG00000186298 | validated |
| tarbase | hsa-miR-212-3p  | PPP1CC   | 5501      | ENSG00000186298 | validated |
| tarbase | hsa-miR-301a-3p | PPP1CC   | 5501      | ENSG00000186298 | validated |
| tarbase | hsa-miR-326     | PPP1CC   | 5501      | ENSG00000186298 | validated |
| tarbase | hsa-miR-582-3p  | PPP1CC   | 5501      | ENSG00000186298 | validated |
| tarbase | hsa-miR-212-3p  | ZNF555   | 148254    | ENSG00000186300 | validated |
| tarbase | hsa-miR-181a-5p | NAP1L3   | 4675      | ENSG00000186310 | validated |
| tarbase | hsa-miR-296-5p  | THBS2    | 7058      | ENSG00000186340 | validated |
| tarbase | hsa-miR-21-5p   | RXRA     | 6256      | ENSG00000186350 | validated |
| tarbase | hsa-miR-21-5p   | ZNF75D   | 7626      | ENSG00000186376 | validated |
| tarbase | hsa-miR-181a-5p | NKRF     | 55922     | ENSG00000186416 | validated |
| tarbase | hsa-miR-582-3p  | NKRF     | 55922     | ENSG00000186416 | validated |
| tarbase | hsa-miR-106b-5p | KPNA4    | 3840      | ENSG00000186432 | validated |
| tarbase | hsa-miR-181a-5p | KPNA4    | 3840      | ENSG00000186432 | validated |
| tarbase | hsa-miR-21-5p   | KPNA4    | 3840      | ENSG00000186432 | validated |
| tarbase | hsa-miR-222-3p  | KPNA4    | 3840      | ENSG00000186432 | validated |
| tarbase | hsa-miR-212-3p  | FAM228A  | 653140    | ENSG00000186453 | validated |
| tarbase | hsa-miR-181a-5p | NAP1L2   | 4674      | ENSG00000186462 | validated |
| tarbase | hsa-miR-505-3p  | NAP1L2   | 4674      | ENSG00000186462 | validated |
| tarbase | hsa-miR-15b-5p  | RGS7BP   | 401190    | ENSG00000186479 | validated |
| tarbase | hsa-miR-181a-5p | INSIG1   | 3638      | ENSG00000186480 | validated |
| tarbase | hsa-miR-301a-3p | INSIG1   | 3638      | ENSG00000186480 | validated |
| tarbase | hsa-miR-326     | INSIG1   | 3638      | ENSG00000186480 | validated |
| tarbase | hsa-miR-21-5p   | SEPTIN10 | 151011    | ENSG00000186522 | validated |
| tarbase | hsa-miR-192-5p  | GPATCH8  | 23131     | ENSG00000186566 | validated |
| tarbase | hsa-miR-296-5p  | GPATCH8  | 23131     | ENSG00000186566 | validated |
| tarbase | hsa-miR-582-3p  | GPATCH8  | 23131     | ENSG00000186566 | validated |
| tarbase | hsa-miR-212-3p  | CEACAM19 | 56971     | ENSG00000186567 | validated |
| tarbase | hsa-miR-21-5p   | NF2      | 4771      | ENSG00000186575 | validated |
| tarbase | hsa-miR-296-5p  | SMIM29   | 221491    | ENSG00000186577 | validated |
| tarbase | hsa-miR-582-5p  | UBE2H    | 7328      | ENSG00000186591 | validated |
| tarbase | hsa-miR-106b-5p | ZFP91    | 80829     | ENSG00000186660 | validated |
| tarbase | hsa-miR-18a-5p  | ZFP91    | 80829     | ENSG00000186660 | validated |
| tarbase | hsa-miR-326     | ZFP91    | 80829     | ENSG00000186660 | validated |
| tarbase | hsa-miR-582-3p  | ZFP91    | 80829     | ENSG00000186660 | validated |
| tarbase | hsa-miR-106b-5p | SPIN4    | 139886    | ENSG00000186767 | validated |
| tarbase | hsa-miR-301a-3p | SPIN4    | 139886    | ENSG00000186767 | validated |
| tarbase | hsa-miR-212-3p  | VSIG10L  | 147645    | ENSG00000186806 | validated |
| tarbase | hsa-miR-181a-5p | ZNF397   | 84307     | ENSG00000186812 | validated |
| tarbase | hsa-miR-21-5p   | ZSCAN30  | 100101467 | ENSG00000186814 | validated |
| tarbase | hsa-miR-222-3p  | TPCN1    | 53373     | ENSG00000186815 | validated |
| tarbase | hsa-miR-15b-5p  | TPCN1    | 53373     | ENSG00000186815 | validated |



|         |                 |            |        |                 |           |
|---------|-----------------|------------|--------|-----------------|-----------|
| tarbase | hsa-miR-106b-5p | HEXIM1     | 10614  | ENSG00000186834 | validated |
| tarbase | hsa-miR-15b-5p  | HEXIM1     | 10614  | ENSG00000186834 | validated |
| tarbase | hsa-miR-181a-5p | HEXIM1     | 10614  | ENSG00000186834 | validated |
| tarbase | hsa-miR-212-3p  | HEXIM1     | 10614  | ENSG00000186834 | validated |
| tarbase | hsa-miR-326     | HEXIM1     | 10614  | ENSG00000186834 | validated |
| tarbase | hsa-miR-212-3p  | TMEM17     | 200728 | ENSG00000186889 | validated |
| tarbase | hsa-miR-106b-5p | ZDHHC17    | 23390  | ENSG00000186908 | validated |
| tarbase | hsa-miR-18a-5p  | ZDHHC17    | 23390  | ENSG00000186908 | validated |
| tarbase | hsa-miR-582-3p  | ZDHHC17    | 23390  | ENSG00000186908 | validated |
| tarbase | hsa-miR-15b-5p  | ZDHHC17    | 23390  | ENSG00000186908 | validated |
| tarbase | hsa-miR-296-5p  | ZNF395     | 55893  | ENSG00000186918 | validated |
| tarbase | hsa-miR-106b-5p | PPARA      | 5465   | ENSG00000186951 | validated |
| tarbase | hsa-miR-181a-5p | PPARA      | 5465   | ENSG00000186951 | validated |
| tarbase | hsa-miR-106b-5p | C3orf70    | 285382 | ENSG00000187068 | validated |
| tarbase | hsa-miR-505-3p  | C3orf70    | 285382 | ENSG00000187068 | validated |
| tarbase | hsa-miR-505-3p  | TEAD1      | 7003   | ENSG00000187079 | validated |
| tarbase | hsa-miR-15b-5p  | ENTPD5     | 957    | ENSG00000187097 | validated |
| tarbase | hsa-miR-192-5p  | ENTPD5     | 957    | ENSG00000187097 | validated |
| tarbase | hsa-miR-106b-5p | NAP1L1     | 4673   | ENSG00000187109 | validated |
| tarbase | hsa-miR-181a-5p | NAP1L1     | 4673   | ENSG00000187109 | validated |
| tarbase | hsa-miR-21-5p   | NAP1L1     | 4673   | ENSG00000187109 | validated |
| tarbase | hsa-miR-212-3p  | FOXD3      | 27022  | ENSG00000187140 | validated |
| tarbase | hsa-miR-181a-5p | RNF220     | 55182  | ENSG00000187147 | validated |
| tarbase | hsa-miR-21-5p   | SHTN1      | 57698  | ENSG00000187164 | validated |
| tarbase | hsa-miR-181a-5p | TSPYL4     | 23270  | ENSG00000187189 | validated |
| tarbase | hsa-miR-106b-5p | TSPYL4     | 23270  | ENSG00000187189 | validated |
| tarbase | hsa-miR-212-3p  | GCNT1      | 2650   | ENSG00000187210 | validated |
| tarbase | hsa-miR-301a-3p | SESTD1     | 91404  | ENSG00000187231 | validated |
| tarbase | hsa-miR-212-3p  | FNBP1      | 23048  | ENSG00000187239 | validated |
| tarbase | hsa-miR-21-5p   | DYNC2H1    | 79659  | ENSG00000187240 | validated |
| tarbase | hsa-miR-212-3p  | FAM9C      | 171484 | ENSG00000187268 | validated |
| tarbase | hsa-miR-192-5p  | CHP1       | 11261  | ENSG00000187446 | validated |
| tarbase | hsa-miR-181a-5p | HSPA14     | 51182  | ENSG00000187522 | validated |
| tarbase | hsa-miR-301a-3p | SIRT7      | 51547  | ENSG00000187531 | validated |
| tarbase | hsa-miR-212-3p  | PRAMEF10   | 343071 | ENSG00000187545 | validated |
| tarbase | hsa-miR-144-3p  | USP7       | 7874   | ENSG00000187555 | validated |
| tarbase | hsa-miR-181a-5p | USP7       | 7874   | ENSG00000187555 | validated |
| tarbase | hsa-miR-582-5p  | USP7       | 7874   | ENSG00000187555 | validated |
| tarbase | hsa-miR-212-3p  | COX8C      | 341947 | ENSG00000187581 | validated |
| tarbase | hsa-miR-212-3p  | MAGEH1     | 28986  | ENSG00000187601 | validated |
| tarbase | hsa-miR-144-3p  | TET3       | 200424 | ENSG00000187605 | validated |
| tarbase | hsa-miR-181a-5p | TET3       | 200424 | ENSG00000187605 | validated |
| tarbase | hsa-miR-301a-3p | TET3       | 200424 | ENSG00000187605 | validated |
| tarbase | hsa-miR-582-5p  | TET3       | 200424 | ENSG00000187605 | validated |
| tarbase | hsa-miR-21-5p   | TET3       | 200424 | ENSG00000187605 | validated |
| tarbase | hsa-miR-21-5p   | ZNF286A    | 57335  | ENSG00000187607 | validated |
| tarbase | hsa-miR-212-3p  | ISG15      | 9636   | ENSG00000187608 | validated |
| tarbase | hsa-miR-15b-5p  | EXD3       | 54932  | ENSG00000187609 | validated |
| tarbase | hsa-miR-582-5p  | EXD3       | 54932  | ENSG00000187609 | validated |
| tarbase | hsa-miR-212-3p  | C17orf97   | 400566 | ENSG00000187624 | validated |
| tarbase | hsa-miR-106b-5p | SPRY4      | 81848  | ENSG00000187678 | validated |
| tarbase | hsa-miR-15b-5p  | SPRY4      | 81848  | ENSG00000187678 | validated |
| tarbase | hsa-miR-15b-5p  | TMEM203    | 94107  | ENSG00000187713 | validated |
| tarbase | hsa-miR-582-5p  | TCEA1      | 6917   | ENSG00000187735 | validated |
| tarbase | hsa-miR-15b-5p  | FANCA      | 2175   | ENSG00000187741 | validated |
| tarbase | hsa-miR-212-3p  | ADH1A      | 124    | ENSG00000187758 | validated |
| tarbase | hsa-miR-181a-5p | LIN28B     | 389421 | ENSG00000187772 | validated |
| tarbase | hsa-miR-21-5p   | ZNF70      | 7621   | ENSG00000187792 | validated |
| tarbase | hsa-miR-181a-5p | PEAR1      | 375033 | ENSG00000187800 | validated |
| tarbase | hsa-miR-18a-5p  | ZFP69B     | 65243  | ENSG00000187801 | validated |
| tarbase | hsa-miR-18a-5p  | ZFP69      | 339559 | ENSG00000187815 | validated |
| tarbase | hsa-miR-181a-5p | ZFP69      | 339559 | ENSG00000187815 | validated |
| tarbase | hsa-miR-15b-5p  | H1-2       | 3006   | ENSG00000187837 | validated |
| tarbase | hsa-miR-181a-5p | AC091057.1 |        | ENSG00000187951 | validated |
| tarbase | hsa-miR-15b-5p  | DNER       | 92737  | ENSG00000187957 | validated |
| tarbase | hsa-miR-296-5p  | KLHL17     | 339451 | ENSG00000187961 | validated |
| tarbase | hsa-miR-181a-5p | UBQLN2     | 29978  | ENSG00000188021 | validated |
| tarbase | hsa-miR-582-5p  | UBQLN2     | 29978  | ENSG00000188021 | validated |
| tarbase | hsa-miR-106b-5p | ARL4C      | 10123  | ENSG00000188042 | validated |
| tarbase | hsa-miR-144-3p  | ARL4C      | 10123  | ENSG00000188042 | validated |
| tarbase | hsa-miR-582-3p  | ARL4C      | 10123  | ENSG00000188042 | validated |

|         |                 |            |        |                 |           |
|---------|-----------------|------------|--------|-----------------|-----------|
| tarbase | hsa-miR-106b-5p | C11orf95   | 65998  | ENSG00000188070 | validated |
| tarbase | hsa-miR-21-5p   | C11orf95   | 65998  | ENSG00000188070 | validated |
| tarbase | hsa-miR-296-5p  | C11orf95   | 65998  | ENSG00000188070 | validated |
| tarbase | hsa-miR-212-3p  | GPR89B     | 51463  | ENSG00000188092 | validated |
| tarbase | hsa-miR-582-3p  | MAPK12     | 6300   | ENSG00000188130 | validated |
| tarbase | hsa-miR-15b-5p  | COL4A5     | 1287   | ENSG00000188153 | validated |
| tarbase | hsa-miR-15b-5p  | AGRN       | 375790 | ENSG00000188157 | validated |
| tarbase | hsa-miR-181a-5p | AGRN       | 375790 | ENSG00000188157 | validated |
| tarbase | hsa-miR-301a-3p | AGRN       | 375790 | ENSG00000188157 | validated |
| tarbase | hsa-miR-222-3p  | OTOG       | 340990 | ENSG00000188162 | validated |
| tarbase | hsa-miR-212-3p  | TMPPE      | 643853 | ENSG00000188167 | validated |
| tarbase | hsa-miR-326     | TMPPE      | 643853 | ENSG00000188167 | validated |
| tarbase | hsa-miR-181a-5p | ZNF626     | 199777 | ENSG00000188171 | validated |
| tarbase | hsa-miR-18a-5p  | ZNF626     | 199777 | ENSG00000188171 | validated |
| tarbase | hsa-miR-212-3p  | HEPACAM2   | 253012 | ENSG00000188175 | validated |
| tarbase | hsa-miR-15b-5p  | ZC3H6      | 376940 | ENSG00000188177 | validated |
| tarbase | hsa-miR-582-5p  | ZC3H6      | 376940 | ENSG00000188177 | validated |
| tarbase | hsa-miR-212-3p  | ZC3H6      | 376940 | ENSG00000188177 | validated |
| tarbase | hsa-miR-212-3p  | DCUN1D3    | 123879 | ENSG00000188215 | validated |
| tarbase | hsa-miR-21-5p   | DCUN1D3    | 123879 | ENSG00000188215 | validated |
| tarbase | hsa-miR-18a-5p  | TUBB4B     | 10383  | ENSG00000188229 | validated |
| tarbase | hsa-miR-181a-5p | AC010442.1 |        | ENSG00000188242 | validated |
| tarbase | hsa-miR-144-3p  | HES4       | 57801  | ENSG00000188290 | validated |
| tarbase | hsa-miR-222-3p  | HES4       | 57801  | ENSG00000188290 | validated |
| tarbase | hsa-miR-326     | HES4       | 57801  | ENSG00000188290 | validated |
| tarbase | hsa-miR-582-5p  | HES4       | 57801  | ENSG00000188290 | validated |
| tarbase | hsa-miR-212-3p  | PLSCR1     | 5359   | ENSG00000188313 | validated |
| tarbase | hsa-miR-15b-5p  | C3orf62    | 375341 | ENSG00000188315 | validated |
| tarbase | hsa-miR-505-3p  | ZNF559     | 84527  | ENSG00000188321 | validated |
| tarbase | hsa-miR-192-5p  | FOCAD      | 54914  | ENSG00000188352 | validated |
| tarbase | hsa-miR-21-5p   | CHM        | 1121   | ENSG00000188419 | validated |
| tarbase | hsa-miR-582-3p  | CHM        | 1121   | ENSG00000188419 | validated |
| tarbase | hsa-miR-18a-5p  | H2AX       | 3014   | ENSG00000188486 | validated |
| tarbase | hsa-miR-222-3p  | KRTDAP     | 388533 | ENSG00000188508 | validated |
| tarbase | hsa-miR-21-5p   | NBR1       | 4077   | ENSG00000188554 | validated |
| tarbase | hsa-miR-18a-5p  | RALGAPA2   | 57186  | ENSG00000188559 | validated |
| tarbase | hsa-miR-15b-5p  | RTL6       | 84247  | ENSG00000188636 | validated |
| tarbase | hsa-miR-181a-5p | RTL6       | 84247  | ENSG00000188636 | validated |
| tarbase | hsa-miR-192-5p  | S100A16    | 140576 | ENSG00000188643 | validated |
| tarbase | hsa-miR-21-5p   | S100A16    | 140576 | ENSG00000188643 | validated |
| tarbase | hsa-miR-18a-5p  | PTAR1      | 375743 | ENSG00000188647 | validated |
| tarbase | hsa-miR-212-3p  | SAXO2      | 283726 | ENSG00000188659 | validated |
| tarbase | hsa-miR-192-5p  | RHCE       | 6006   | ENSG00000188672 | validated |
| tarbase | hsa-miR-505-3p  | PARVB      | 29780  | ENSG00000188677 | validated |
| tarbase | hsa-miR-326     | SMIM15     | 643155 | ENSG00000188725 | validated |
| tarbase | hsa-miR-106b-5p | SMIM15     | 643155 | ENSG00000188725 | validated |
| tarbase | hsa-miR-106b-5p | RBM34      | 23029  | ENSG00000188739 | validated |
| tarbase | hsa-miR-144-3p  | SKOR1      | 390598 | ENSG00000188779 | validated |
| tarbase | hsa-miR-15b-5p  | MTF1       | 4520   | ENSG00000188786 | validated |
| tarbase | hsa-miR-222-3p  | MTF1       | 4520   | ENSG00000188786 | validated |
| tarbase | hsa-miR-301a-3p | MTF1       | 4520   | ENSG00000188786 | validated |
| tarbase | hsa-miR-192-5p  | TMEM201    | 199953 | ENSG00000188807 | validated |
| tarbase | hsa-miR-222-3p  | NHLRC3     | 387921 | ENSG00000188811 | validated |
| tarbase | hsa-miR-212-3p  | CNR2       | 1269   | ENSG00000188822 | validated |
| tarbase | hsa-miR-106b-5p | BEND4      | 389206 | ENSG00000188848 | validated |
| tarbase | hsa-miR-181a-5p | BEND4      | 389206 | ENSG00000188848 | validated |
| tarbase | hsa-miR-15b-5p  | BEND4      | 389206 | ENSG00000188848 | validated |
| tarbase | hsa-miR-106b-5p | MSL1       | 339287 | ENSG00000188895 | validated |
| tarbase | hsa-miR-212-3p  | MSL1       | 339287 | ENSG00000188895 | validated |
| tarbase | hsa-miR-582-3p  | MSL1       | 339287 | ENSG00000188895 | validated |
| tarbase | hsa-miR-181a-5p | TRMT2B     | 79979  | ENSG00000188917 | validated |
| tarbase | hsa-miR-15b-5p  | NOC2L      | 26155  | ENSG00000188976 | validated |
| tarbase | hsa-miR-301a-3p | NOC2L      | 26155  | ENSG00000188976 | validated |
| tarbase | hsa-miR-212-3p  | LRRC66     | 339977 | ENSG00000188993 | validated |
| tarbase | hsa-miR-106b-5p | ZNF292     | 23036  | ENSG00000188994 | validated |
| tarbase | hsa-miR-18a-5p  | ZNF292     | 23036  | ENSG00000188994 | validated |
| tarbase | hsa-miR-582-3p  | ADAT2      | 134637 | ENSG00000189007 | validated |
| tarbase | hsa-miR-181a-5p | ZNF567     | 163081 | ENSG00000189042 | validated |
| tarbase | hsa-miR-21-5p   | ZNF567     | 163081 | ENSG00000189042 | validated |
| tarbase | hsa-miR-212-3p  | APOD       | 347    | ENSG00000189058 | validated |
| tarbase | hsa-miR-106b-5p | H1-0       | 3005   | ENSG00000189060 | validated |

|         |                 |          |        |                 |           |
|---------|-----------------|----------|--------|-----------------|-----------|
| tarbase | hsa-miR-18a-5p  | H1-0     | 3005   | ENSG00000189060 | validated |
| tarbase | hsa-miR-582-3p  | H1-0     | 3005   | ENSG00000189060 | validated |
| tarbase | hsa-miR-106b-5p | LITAF    | 9516   | ENSG00000189067 | validated |
| tarbase | hsa-miR-181a-5p | LITAF    | 9516   | ENSG00000189067 | validated |
| tarbase | hsa-miR-181a-5p | SF3B3    | 23450  | ENSG00000189091 | validated |
| tarbase | hsa-miR-192-5p  | SF3B3    | 23450  | ENSG00000189091 | validated |
| tarbase | hsa-miR-212-3p  | SF3B3    | 23450  | ENSG00000189091 | validated |
| tarbase | hsa-miR-21-5p   | SF3B3    | 23450  | ENSG00000189091 | validated |
| tarbase | hsa-miR-15b-5p  | CLDN4    | 1364   | ENSG00000189143 | validated |
| tarbase | hsa-miR-192-5p  | ZNF573   | 126231 | ENSG00000189144 | validated |
| tarbase | hsa-miR-181a-5p | ZNF573   | 126231 | ENSG00000189144 | validated |
| tarbase | hsa-miR-212-3p  | JPT1     | 51155  | ENSG00000189159 | validated |
| tarbase | hsa-miR-181a-5p | S100A13  | 6284   | ENSG00000189171 | validated |
| tarbase | hsa-miR-106b-5p | TSPYL1   | 7259   | ENSG00000189241 | validated |
| tarbase | hsa-miR-18a-5p  | TSPYL1   | 7259   | ENSG00000189241 | validated |
| tarbase | hsa-miR-212-3p  | TSPYL1   | 7259   | ENSG00000189241 | validated |
| tarbase | hsa-miR-296-5p  | TSPYL1   | 7259   | ENSG00000189241 | validated |
| tarbase | hsa-miR-301a-3p | TSPYL1   | 7259   | ENSG00000189241 | validated |
| tarbase | hsa-miR-181a-5p | TSPYL1   | 7259   | ENSG00000189241 | validated |
| tarbase | hsa-miR-212-3p  | GJB5     | 2709   | ENSG00000189280 | validated |
| tarbase | hsa-miR-582-3p  | FHIT     | 2272   | ENSG00000189283 | validated |
| tarbase | hsa-miR-106b-5p | LIN54    | 132660 | ENSG00000189308 | validated |
| tarbase | hsa-miR-181a-5p | LIN54    | 132660 | ENSG00000189308 | validated |
| tarbase | hsa-miR-222-3p  | FAM53B   | 9679   | ENSG00000189319 | validated |
| tarbase | hsa-miR-301a-3p | KAZN     | 23254  | ENSG00000189337 | validated |
| tarbase | hsa-miR-296-5p  | SLC35E2B | 728661 | ENSG00000189339 | validated |
| tarbase | hsa-miR-15b-5p  | TOGARAM2 | 165186 | ENSG00000189350 | validated |
| tarbase | hsa-miR-106b-5p | GSPT2    | 23708  | ENSG00000189369 | validated |
| tarbase | hsa-miR-106b-5p | ZNF724   | 440519 | ENSG00000196081 | validated |
| tarbase | hsa-miR-18a-5p  | ZNF724   | 440519 | ENSG00000196081 | validated |
| tarbase | hsa-miR-144-3p  | IL1RAP   | 3556   | ENSG00000196083 | validated |
| tarbase | hsa-miR-301a-3p | IL1RAP   | 3556   | ENSG00000196083 | validated |
| tarbase | hsa-miR-15b-5p  | PTPRT    | 11122  | ENSG00000196090 | validated |
| tarbase | hsa-miR-181a-5p | PTPRT    | 11122  | ENSG00000196090 | validated |
| tarbase | hsa-miR-296-5p  | SERPINA3 | 12     | ENSG00000196136 | validated |
| tarbase | hsa-miR-212-3p  | AKR1C3   | 8644   | ENSG00000196139 | validated |
| tarbase | hsa-miR-222-3p  | AKR1C3   | 8644   | ENSG00000196139 | validated |
| tarbase | hsa-miR-222-3p  | SPATS2L  | 26010  | ENSG00000196141 | validated |
| tarbase | hsa-miR-301a-3p | ZNF250   | 58500  | ENSG00000196150 | validated |
| tarbase | hsa-miR-15b-5p  | WDSUB1   | 151525 | ENSG00000196151 | validated |
| tarbase | hsa-miR-18a-5p  | ZNF681   | 148213 | ENSG00000196172 | validated |
| tarbase | hsa-miR-15b-5p  | ACADSB   | 36     | ENSG00000196177 | validated |
| tarbase | hsa-miR-296-5p  | STK40    | 83931  | ENSG00000196182 | validated |
| tarbase | hsa-miR-301a-3p | TMEM63A  | 9725   | ENSG00000196187 | validated |
| tarbase | hsa-miR-326     | TMEM63A  | 9725   | ENSG00000196187 | validated |
| tarbase | hsa-miR-301a-3p | MPHOSPH8 | 54737  | ENSG00000196199 | validated |
| tarbase | hsa-miR-582-5p  | MPHOSPH8 | 54737  | ENSG00000196199 | validated |
| tarbase | hsa-miR-106b-5p | GREB1    | 9687   | ENSG00000196208 | validated |
| tarbase | hsa-miR-15b-5p  | GREB1    | 9687   | ENSG00000196208 | validated |
| tarbase | hsa-miR-181a-5p | ZNF766   | 90321  | ENSG00000196214 | validated |
| tarbase | hsa-miR-15b-5p  | SRGAP3   | 9901   | ENSG00000196220 | validated |
| tarbase | hsa-miR-15b-5p  | FAM217B  | 63939  | ENSG00000196227 | validated |
| tarbase | hsa-miR-18a-5p  | TUBB     | 203068 | ENSG00000196230 | validated |
| tarbase | hsa-miR-192-5p  | TUBB     | 203068 | ENSG00000196230 | validated |
| tarbase | hsa-miR-21-5p   | TUBB     | 203068 | ENSG00000196230 | validated |
| tarbase | hsa-miR-301a-3p | TUBB     | 203068 | ENSG00000196230 | validated |
| tarbase | hsa-miR-582-3p  | TUBB     | 203068 | ENSG00000196230 | validated |
| tarbase | hsa-miR-106b-5p | LCOR     | 84458  | ENSG00000196233 | validated |
| tarbase | hsa-miR-18a-5p  | LCOR     | 84458  | ENSG00000196233 | validated |
| tarbase | hsa-miR-212-3p  | LCOR     | 84458  | ENSG00000196233 | validated |
| tarbase | hsa-miR-21-5p   | LCOR     | 84458  | ENSG00000196233 | validated |
| tarbase | hsa-miR-301a-3p | LCOR     | 84458  | ENSG00000196233 | validated |
| tarbase | hsa-miR-582-5p  | LCOR     | 84458  | ENSG00000196233 | validated |
| tarbase | hsa-miR-15b-5p  | XPNPEP3  | 63929  | ENSG00000196236 | validated |
| tarbase | hsa-miR-326     | XPNPEP3  | 63929  | ENSG00000196236 | validated |
| tarbase | hsa-miR-18a-5p  | ZNF107   | 51427  | ENSG00000196247 | validated |
| tarbase | hsa-miR-212-3p  | ZNF107   | 51427  | ENSG00000196247 | validated |
| tarbase | hsa-miR-582-5p  | ZNF107   | 51427  | ENSG00000196247 | validated |
| tarbase | hsa-miR-21-5p   | ZNF107   | 51427  | ENSG00000196247 | validated |
| tarbase | hsa-miR-21-5p   | PPIA     | 5478   | ENSG00000196262 | validated |
| tarbase | hsa-miR-582-5p  | PPIA     | 5478   | ENSG00000196262 | validated |

|         |                 |         |           |                 |           |
|---------|-----------------|---------|-----------|-----------------|-----------|
| tarbase | hsa-miR-212-3p  | ZNF471  | 57573     | ENSG00000196263 | validated |
| tarbase | hsa-miR-18a-5p  | ZNF493  | 284443    | ENSG00000196268 | validated |
| tarbase | hsa-miR-21-5p   | ZNF493  | 284443    | ENSG00000196268 | validated |
| tarbase | hsa-miR-181a-5p | NIF3L1  | 60491     | ENSG00000196290 | validated |
| tarbase | hsa-miR-15b-5p  | IARS1   | 3376      | ENSG00000196305 | validated |
| tarbase | hsa-miR-18a-5p  | IARS1   | 3376      | ENSG00000196305 | validated |
| tarbase | hsa-miR-144-3p  | POM121  | 9883      | ENSG00000196313 | validated |
| tarbase | hsa-miR-212-3p  | POM121  | 9883      | ENSG00000196313 | validated |
| tarbase | hsa-miR-21-5p   | ZBTB44  | 29068     | ENSG00000196323 | validated |
| tarbase | hsa-miR-181a-5p | ZBTB44  | 29068     | ENSG00000196323 | validated |
| tarbase | hsa-miR-212-3p  | STK31   | 56164     | ENSG00000196335 | validated |
| tarbase | hsa-miR-192-5p  | CD55    | 1604      | ENSG00000196352 | validated |
| tarbase | hsa-miR-192-5p  | CPNE4   | 131034    | ENSG00000196353 | validated |
| tarbase | hsa-miR-181a-5p | ZNF565  | 147929    | ENSG00000196357 | validated |
| tarbase | hsa-miR-15b-5p  | TRRAP   | 8295      | ENSG00000196367 | validated |
| tarbase | hsa-miR-181a-5p | TRRAP   | 8295      | ENSG00000196367 | validated |
| tarbase | hsa-miR-212-3p  | TRRAP   | 8295      | ENSG00000196367 | validated |
| tarbase | hsa-miR-15b-5p  | FUT4    | 2526      | ENSG00000196371 | validated |
| tarbase | hsa-miR-582-5p  | ZNF140  | 7699      | ENSG00000196387 | validated |
| tarbase | hsa-miR-192-5p  | PTPN1   | 5770      | ENSG00000196396 | validated |
| tarbase | hsa-miR-301a-3p | PTPN1   | 5770      | ENSG00000196396 | validated |
| tarbase | hsa-miR-301a-3p | EPHB4   | 2050      | ENSG00000196411 | validated |
| tarbase | hsa-miR-181a-5p | ZNF124  | 7678      | ENSG00000196418 | validated |
| tarbase | hsa-miR-192-5p  | XRCC6   | 2547      | ENSG00000196419 | validated |
| tarbase | hsa-miR-21-5p   | XRCC6   | 2547      | ENSG00000196419 | validated |
| tarbase | hsa-miR-106b-5p | TSC22D2 | 9819      | ENSG00000196428 | validated |
| tarbase | hsa-miR-301a-3p | TSC22D2 | 9819      | ENSG00000196428 | validated |
| tarbase | hsa-miR-181a-5p | TSC22D2 | 9819      | ENSG00000196428 | validated |
| tarbase | hsa-miR-181a-5p | ZNF569  | 148266    | ENSG00000196437 | validated |
| tarbase | hsa-miR-192-5p  | ARMCX4  | 100131755 | ENSG00000196440 | validated |
| tarbase | hsa-miR-18a-5p  | YRDC    | 79693     | ENSG00000196449 | validated |
| tarbase | hsa-miR-106b-5p | YRDC    | 79693     | ENSG00000196449 | validated |
| tarbase | hsa-miR-181a-5p | YRDC    | 79693     | ENSG00000196449 | validated |
| tarbase | hsa-miR-582-5p  | SIAH1   | 6477      | ENSG00000196470 | validated |
| tarbase | hsa-miR-15b-5p  | SIAH1   | 6477      | ENSG00000196470 | validated |
| tarbase | hsa-miR-222-3p  | SIAH1   | 6477      | ENSG00000196470 | validated |
| tarbase | hsa-miR-212-3p  | ESRRG   | 2104      | ENSG00000196482 | validated |
| tarbase | hsa-miR-192-5p  | NCOR2   | 9612      | ENSG00000196498 | validated |
| tarbase | hsa-miR-15b-5p  | PRPF40A | 55660     | ENSG00000196504 | validated |
| tarbase | hsa-miR-582-5p  | PRPF40A | 55660     | ENSG00000196504 | validated |
| tarbase | hsa-miR-21-5p   | TCEAL3  | 85012     | ENSG00000196507 | validated |
| tarbase | hsa-miR-181a-5p | ANAPC7  | 51434     | ENSG00000196510 | validated |
| tarbase | hsa-miR-222-3p  | SLC6A9  | 6536      | ENSG00000196517 | validated |
| tarbase | hsa-miR-15b-5p  | AFAP1   | 60312     | ENSG00000196526 | validated |
| tarbase | hsa-miR-181a-5p | AFAP1   | 60312     | ENSG00000196526 | validated |
| tarbase | hsa-miR-212-3p  | AFAP1   | 60312     | ENSG00000196526 | validated |
| tarbase | hsa-miR-582-5p  | AFAP1   | 60312     | ENSG00000196526 | validated |
| tarbase | hsa-miR-18a-5p  | NACA    | 4666      | ENSG00000196531 | validated |
| tarbase | hsa-miR-15b-5p  | MME     | 4311      | ENSG00000196549 | validated |
| tarbase | hsa-miR-222-3p  | MME     | 4311      | ENSG00000196549 | validated |
| tarbase | hsa-miR-296-5p  | MME     | 4311      | ENSG00000196549 | validated |
| tarbase | hsa-miR-212-3p  | MME     | 4311      | ENSG00000196549 | validated |
| tarbase | hsa-miR-106b-5p | SULF2   | 55959     | ENSG00000196562 | validated |
| tarbase | hsa-miR-15b-5p  | PLXNB2  | 23654     | ENSG00000196576 | validated |
| tarbase | hsa-miR-106b-5p | XRCC2   | 7516      | ENSG00000196584 | validated |
| tarbase | hsa-miR-21-5p   | HDAC2   | 3066      | ENSG00000196591 | validated |
| tarbase | hsa-miR-106b-5p | UGT2B15 | 7366      | ENSG00000196620 | validated |
| tarbase | hsa-miR-21-5p   | TCF4    | 6925      | ENSG00000196628 | validated |
| tarbase | hsa-miR-301a-3p | TCF4    | 6925      | ENSG00000196628 | validated |
| tarbase | hsa-miR-106b-5p | RABL6   | 55684     | ENSG00000196642 | validated |
| tarbase | hsa-miR-15b-5p  | RABL6   | 55684     | ENSG00000196642 | validated |
| tarbase | hsa-miR-296-5p  | RABL6   | 55684     | ENSG00000196642 | validated |
| tarbase | hsa-miR-326     | RABL6   | 55684     | ENSG00000196642 | validated |
| tarbase | hsa-miR-106b-5p | ZNF502  | 91392     | ENSG00000196653 | validated |
| tarbase | hsa-miR-15b-5p  | TTC30B  | 150737    | ENSG00000196659 | validated |
| tarbase | hsa-miR-212-3p  | TTC30B  | 150737    | ENSG00000196659 | validated |
| tarbase | hsa-miR-21-5p   | TECPR2  | 9895      | ENSG00000196663 | validated |
| tarbase | hsa-miR-181a-5p | ZFP62   | 643836    | ENSG00000196670 | validated |
| tarbase | hsa-miR-21-5p   | HSH2D   | 84941     | ENSG00000196684 | validated |
| tarbase | hsa-miR-15b-5p  | ZNF33B  | 7582      | ENSG00000196693 | validated |
| tarbase | hsa-miR-181a-5p | ZNF33B  | 7582      | ENSG00000196693 | validated |

|         |                 |          |        |                 |           |
|---------|-----------------|----------|--------|-----------------|-----------|
| tarbase | hsa-miR-296-5p  | ZNF512B  | 57473  | ENSG00000196700 | validated |
| tarbase | hsa-miR-326     | ZNF512B  | 57473  | ENSG00000196700 | validated |
| tarbase | hsa-miR-181a-5p | ZNF431   | 170959 | ENSG00000196705 | validated |
| tarbase | hsa-miR-15b-5p  | NF1      | 4763   | ENSG00000196712 | validated |
| tarbase | hsa-miR-181a-5p | NF1      | 4763   | ENSG00000196712 | validated |
| tarbase | hsa-miR-212-3p  | NF1      | 4763   | ENSG00000196712 | validated |
| tarbase | hsa-miR-21-5p   | NF1      | 4763   | ENSG00000196712 | validated |
| tarbase | hsa-miR-582-5p  | NF1      | 4763   | ENSG00000196712 | validated |
| tarbase | hsa-miR-106b-5p | VKORC1L1 | 154807 | ENSG00000196715 | validated |
| tarbase | hsa-miR-181a-5p | VKORC1L1 | 154807 | ENSG00000196715 | validated |
| tarbase | hsa-miR-296-5p  | VKORC1L1 | 154807 | ENSG00000196715 | validated |
| tarbase | hsa-miR-15b-5p  | VKORC1L1 | 154807 | ENSG00000196715 | validated |
| tarbase | hsa-miR-181a-5p | DAPK1    | 1612   | ENSG00000196730 | validated |
| tarbase | hsa-miR-18a-5p  | DAPK1    | 1612   | ENSG00000196730 | validated |
| tarbase | hsa-miR-505-3p  | DAPK1    | 1612   | ENSG00000196730 | validated |
| tarbase | hsa-miR-15b-5p  | HLA-DQA1 | 3117   | ENSG00000196735 | validated |
| tarbase | hsa-miR-18a-5p  | HLA-DQA1 | 3117   | ENSG00000196735 | validated |
| tarbase | hsa-miR-212-3p  | HLA-DQA1 | 3117   | ENSG00000196735 | validated |
| tarbase | hsa-miR-181a-5p | ZNF700   | 90592  | ENSG00000196757 | validated |
| tarbase | hsa-miR-301a-3p | STRN3    | 29966  | ENSG00000196792 | validated |
| tarbase | hsa-miR-212-3p  | STRN3    | 29966  | ENSG00000196792 | validated |
| tarbase | hsa-miR-181a-5p | ZNF239   | 8187   | ENSG00000196793 | validated |
| tarbase | hsa-miR-181a-5p | ILRUN    | 64771  | ENSG00000196821 | validated |
| tarbase | hsa-miR-212-3p  | PATE2    | 399967 | ENSG00000196844 | validated |
| tarbase | hsa-miR-106b-5p | PPTC7    | 160760 | ENSG00000196850 | validated |
| tarbase | hsa-miR-181a-5p | PPTC7    | 160760 | ENSG00000196850 | validated |
| tarbase | hsa-miR-582-3p  | PPTC7    | 160760 | ENSG00000196850 | validated |
| tarbase | hsa-miR-582-5p  | PPTC7    | 160760 | ENSG00000196850 | validated |
| tarbase | hsa-miR-15b-5p  | NHLRC2   | 374354 | ENSG00000196865 | validated |
| tarbase | hsa-miR-192-5p  | NHLRC2   | 374354 | ENSG00000196865 | validated |
| tarbase | hsa-miR-582-5p  | NHLRC2   | 374354 | ENSG00000196865 | validated |
| tarbase | hsa-miR-212-3p  | NHLRC2   | 374354 | ENSG00000196865 | validated |
| tarbase | hsa-miR-15b-5p  | KPNA5    | 3841   | ENSG00000196911 | validated |
| tarbase | hsa-miR-192-5p  | ARHGEF12 | 23365  | ENSG00000196914 | validated |
| tarbase | hsa-miR-212-3p  | ARHGEF12 | 23365  | ENSG00000196914 | validated |
| tarbase | hsa-miR-296-5p  | ARHGEF12 | 23365  | ENSG00000196914 | validated |
| tarbase | hsa-miR-326     | ARHGEF12 | 23365  | ENSG00000196914 | validated |
| tarbase | hsa-miR-15b-5p  | ARHGEF12 | 23365  | ENSG00000196914 | validated |
| tarbase | hsa-miR-212-3p  | FLNA     | 2316   | ENSG00000196924 | validated |
| tarbase | hsa-miR-326     | FLNA     | 2316   | ENSG00000196924 | validated |
| tarbase | hsa-miR-18a-5p  | SRGAP1   | 57522  | ENSG00000196935 | validated |
| tarbase | hsa-miR-212-3p  | SRGAP1   | 57522  | ENSG00000196935 | validated |
| tarbase | hsa-miR-21-5p   | SRGAP1   | 57522  | ENSG00000196935 | validated |
| tarbase | hsa-miR-15b-5p  | NOP9     | 161424 | ENSG00000196943 | validated |
| tarbase | hsa-miR-15b-5p  | SLC39A10 | 57181  | ENSG00000196950 | validated |
| tarbase | hsa-miR-181a-5p | SLC39A10 | 57181  | ENSG00000196950 | validated |
| tarbase | hsa-miR-21-5p   | AP2A1    | 160    | ENSG00000196961 | validated |
| tarbase | hsa-miR-296-5p  | AP2A1    | 160    | ENSG00000196961 | validated |
| tarbase | hsa-miR-15b-5p  | ZNF585A  | 199704 | ENSG00000196967 | validated |
| tarbase | hsa-miR-15b-5p  | ANXA4    | 307    | ENSG00000196975 | validated |
| tarbase | hsa-miR-15b-5p  | METTL9   | 51108  | ENSG00000197006 | validated |
| tarbase | hsa-miR-181a-5p | METTL9   | 51108  | ENSG00000197006 | validated |
| tarbase | hsa-miR-106b-5p | ZNF138   | 7697   | ENSG00000197008 | validated |
| tarbase | hsa-miR-18a-5p  | ZNF470   | 388566 | ENSG00000197016 | validated |
| tarbase | hsa-miR-18a-5p  | ZNF100   | 163227 | ENSG00000197020 | validated |
| tarbase | hsa-miR-106b-5p | ZNF398   | 57541  | ENSG00000197024 | validated |
| tarbase | hsa-miR-301a-3p | ZSCAN25  | 221785 | ENSG00000197037 | validated |
| tarbase | hsa-miR-212-3p  | ZNF441   | 126068 | ENSG00000197044 | validated |
| tarbase | hsa-miR-106b-5p | GMFB     | 2764   | ENSG00000197045 | validated |
| tarbase | hsa-miR-181a-5p | GMFB     | 2764   | ENSG00000197045 | validated |
| tarbase | hsa-miR-181a-5p | ZMYM1    | 79830  | ENSG00000197056 | validated |
| tarbase | hsa-miR-582-3p  | ZMYM1    | 79830  | ENSG00000197056 | validated |
| tarbase | hsa-miR-296-5p  | H4C3     | 8364   | ENSG00000197061 | validated |
| tarbase | hsa-miR-18a-5p  | H4C3     | 8364   | ENSG00000197061 | validated |
| tarbase | hsa-miR-106b-5p | ZSCAN26  | 7741   | ENSG00000197062 | validated |
| tarbase | hsa-miR-106b-5p | MAFG     | 4097   | ENSG00000197063 | validated |
| tarbase | hsa-miR-15b-5p  | MAFG     | 4097   | ENSG00000197063 | validated |
| tarbase | hsa-miR-582-5p  | IGF2R    | 3482   | ENSG00000197081 | validated |
| tarbase | hsa-miR-106b-5p | DYNC1H1  | 1778   | ENSG00000197102 | validated |
| tarbase | hsa-miR-15b-5p  | DYNC1H1  | 1778   | ENSG00000197102 | validated |
| tarbase | hsa-miR-181a-5p | DYNC1H1  | 1778   | ENSG00000197102 | validated |

|         |                 |            |        |                 |           |
|---------|-----------------|------------|--------|-----------------|-----------|
| tarbase | hsa-miR-582-5p  | DYNC1H1    | 1778   | ENSG00000197102 | validated |
| tarbase | hsa-miR-181a-5p | PCBP2      | 5094   | ENSG00000197111 | validated |
| tarbase | hsa-miR-21-5p   | PCBP2      | 5094   | ENSG00000197111 | validated |
| tarbase | hsa-miR-106b-5p | PGAP1      | 80055  | ENSG00000197121 | validated |
| tarbase | hsa-miR-181a-5p | ZNF772     | 400720 | ENSG00000197128 | validated |
| tarbase | hsa-miR-21-5p   | LRRRC8B    | 23507  | ENSG00000197147 | validated |
| tarbase | hsa-miR-106b-5p | PSMD12     | 5718   | ENSG00000197170 | validated |
| tarbase | hsa-miR-222-3p  | PSMD12     | 5718   | ENSG00000197170 | validated |
| tarbase | hsa-miR-15b-5p  | MIRLET7BHG |        | ENSG00000197182 | validated |
| tarbase | hsa-miR-21-5p   | NOL4L      | 140688 | ENSG00000197183 | validated |
| tarbase | hsa-miR-15b-5p  | ENTPD4     | 9583   | ENSG00000197217 | validated |
| tarbase | hsa-miR-18a-5p  | TBC1D9B    | 23061  | ENSG00000197226 | validated |
| tarbase | hsa-miR-192-5p  | TBC1D9B    | 23061  | ENSG00000197226 | validated |
| tarbase | hsa-miR-15b-5p  | SERPINA1   | 5265   | ENSG00000197249 | validated |
| tarbase | hsa-miR-212-3p  | SERPINA1   | 5265   | ENSG00000197249 | validated |
| tarbase | hsa-miR-296-5p  | SERPINA1   | 5265   | ENSG00000197249 | validated |
| tarbase | hsa-miR-301a-3p | KANK2      | 25959  | ENSG00000197256 | validated |
| tarbase | hsa-miR-15b-5p  | SYNGAP1    | 8831   | ENSG00000197283 | validated |
| tarbase | hsa-miR-106b-5p | FITM2      | 128486 | ENSG00000197296 | validated |
| tarbase | hsa-miR-15b-5p  | FITM2      | 128486 | ENSG00000197296 | validated |
| tarbase | hsa-miR-15b-5p  | DDI2       | 84301  | ENSG00000197312 | validated |
| tarbase | hsa-miR-181a-5p | DDI2       | 84301  | ENSG00000197312 | validated |
| tarbase | hsa-miR-21-5p   | DDI2       | 84301  | ENSG00000197312 | validated |
| tarbase | hsa-miR-15b-5p  | SVIL       | 6840   | ENSG00000197321 | validated |
| tarbase | hsa-miR-15b-5p  | C17orf102  |        | ENSG00000197322 | validated |
| tarbase | hsa-miR-15b-5p  | TRIM33     | 51592  | ENSG00000197323 | validated |
| tarbase | hsa-miR-181a-5p | TRIM33     | 51592  | ENSG00000197323 | validated |
| tarbase | hsa-miR-222-3p  | TRIM33     | 51592  | ENSG00000197323 | validated |
| tarbase | hsa-miR-106b-5p | PELI1      | 57162  | ENSG00000197329 | validated |
| tarbase | hsa-miR-181a-5p | PELI1      | 57162  | ENSG00000197329 | validated |
| tarbase | hsa-miR-18a-5p  | PELI1      | 57162  | ENSG00000197329 | validated |
| tarbase | hsa-miR-181a-5p | ZNF655     | 79027  | ENSG00000197343 | validated |
| tarbase | hsa-miR-181a-5p | ZNF675     | 171392 | ENSG00000197372 | validated |
| tarbase | hsa-miR-212-3p  | ZNF675     | 171392 | ENSG00000197372 | validated |
| tarbase | hsa-miR-582-3p  | ZNF675     | 171392 | ENSG00000197372 | validated |
| tarbase | hsa-miR-106b-5p | ADARB1     | 104    | ENSG00000197381 | validated |
| tarbase | hsa-miR-181a-5p | ADARB1     | 104    | ENSG00000197381 | validated |
| tarbase | hsa-miR-301a-3p | ADARB1     | 104    | ENSG00000197381 | validated |
| tarbase | hsa-miR-15b-5p  | HTT        | 3064   | ENSG00000197386 | validated |
| tarbase | hsa-miR-192-5p  | HTT        | 3064   | ENSG00000197386 | validated |
| tarbase | hsa-miR-18a-5p  | HTT        | 3064   | ENSG00000197386 | validated |
| tarbase | hsa-miR-106b-5p | MAP3K5     | 4217   | ENSG00000197442 | validated |
| tarbase | hsa-miR-181a-5p | MAP3K5     | 4217   | ENSG00000197442 | validated |
| tarbase | hsa-miR-15b-5p  | PDGFA      | 5154   | ENSG00000197461 | validated |
| tarbase | hsa-miR-212-3p  | GALP       | 85569  | ENSG00000197487 | validated |
| tarbase | hsa-miR-21-5p   | MYO5A      | 4644   | ENSG00000197535 | validated |
| tarbase | hsa-miR-301a-3p | MYO5A      | 4644   | ENSG00000197535 | validated |
| tarbase | hsa-miR-181a-5p | MYO5A      | 4644   | ENSG00000197535 | validated |
| tarbase | hsa-miR-106b-5p | SIPA1L1    | 26037  | ENSG00000197555 | validated |
| tarbase | hsa-miR-212-3p  | TTC30A     | 92104  | ENSG00000197557 | validated |
| tarbase | hsa-miR-106b-5p | PIGN       | 23556  | ENSG00000197563 | validated |
| tarbase | hsa-miR-212-3p  | ZNF624     | 57547  | ENSG00000197566 | validated |
| tarbase | hsa-miR-181a-5p | ENTPD6     | 955    | ENSG00000197586 | validated |
| tarbase | hsa-miR-18a-5p  | ENPP1      | 5167   | ENSG00000197594 | validated |
| tarbase | hsa-miR-181a-5p | FAR1       | 84188  | ENSG00000197601 | validated |
| tarbase | hsa-miR-212-3p  | CPLANE1    | 65250  | ENSG00000197603 | validated |
| tarbase | hsa-miR-301a-3p | MYH6       | 4624   | ENSG00000197616 | validated |
| tarbase | hsa-miR-15b-5p  | CDC42SE1   | 56882  | ENSG00000197622 | validated |
| tarbase | hsa-miR-18a-5p  | CDC42SE1   | 56882  | ENSG00000197622 | validated |
| tarbase | hsa-miR-21-5p   | CDC42SE1   | 56882  | ENSG00000197622 | validated |
| tarbase | hsa-miR-296-5p  | CDC42SE1   | 56882  | ENSG00000197622 | validated |
| tarbase | hsa-miR-21-5p   | SERPINB2   | 5055   | ENSG00000197632 | validated |
| tarbase | hsa-miR-21-5p   | SPTAN1     | 6709   | ENSG00000197694 | validated |
| tarbase | hsa-miR-18a-5p  | KLHL14     | 57565  | ENSG00000197705 | validated |
| tarbase | hsa-miR-18a-5p  | FAM114A1   | 92689  | ENSG00000197712 | validated |
| tarbase | hsa-miR-181a-5p | ZNF460     | 10794  | ENSG00000197714 | validated |
| tarbase | hsa-miR-192-5p  | ZNF460     | 10794  | ENSG00000197714 | validated |
| tarbase | hsa-miR-301a-3p | ZNF460     | 10794  | ENSG00000197714 | validated |
| tarbase | hsa-miR-15b-5p  | PSAP       | 5660   | ENSG00000197746 | validated |
| tarbase | hsa-miR-181a-5p | PSAP       | 5660   | ENSG00000197746 | validated |
| tarbase | hsa-miR-301a-3p | PSAP       | 5660   | ENSG00000197746 | validated |

|         |                 |            |           |                 |           |
|---------|-----------------|------------|-----------|-----------------|-----------|
| tarbase | hsa-miR-582-5p  | PSAP       | 5660      | ENSG00000197746 | validated |
| tarbase | hsa-miR-212-3p  | CFAP43     | 80217     | ENSG00000197748 | validated |
| tarbase | hsa-miR-212-3p  | HOXC6      | 3223      | ENSG00000197757 | validated |
| tarbase | hsa-miR-301a-3p | TXNRD3     | 114112    | ENSG00000197763 | validated |
| tarbase | hsa-miR-18a-5p  | MCMBP      | 79892     | ENSG00000197771 | validated |
| tarbase | hsa-miR-106b-5p | ZNF81      | 347344    | ENSG00000197779 | validated |
| tarbase | hsa-miR-181a-5p | ZNF780A    | 284323    | ENSG00000197782 | validated |
| tarbase | hsa-miR-106b-5p | ZNF461     | 92283     | ENSG00000197808 | validated |
| tarbase | hsa-miR-18a-5p  | OCLN       | 100506658 | ENSG00000197822 | validated |
| tarbase | hsa-miR-296-5p  | H4-16      | 121504    | ENSG00000197837 | validated |
| tarbase | hsa-miR-15b-5p  | ZNF181     | 339318    | ENSG00000197841 | validated |
| tarbase | hsa-miR-18a-5p  | ZNF181     | 339318    | ENSG00000197841 | validated |
| tarbase | hsa-miR-15b-5p  | GPAA1      | 8733      | ENSG00000197858 | validated |
| tarbase | hsa-miR-181a-5p | GPAA1      | 8733      | ENSG00000197858 | validated |
| tarbase | hsa-miR-222-3p  | SGTB       | 54557     | ENSG00000197860 | validated |
| tarbase | hsa-miR-582-5p  | NKIRAS1    | 28512     | ENSG00000197885 | validated |
| tarbase | hsa-miR-212-3p  | MEIG1      | 644890    | ENSG00000197889 | validated |
| tarbase | hsa-miR-181a-5p | ADH5       | 128       | ENSG00000197894 | validated |
| tarbase | hsa-miR-326     | SPG7       | 6687      | ENSG00000197912 | validated |
| tarbase | hsa-miR-18a-5p  | ERO1A      | 30001     | ENSG00000197930 | validated |
| tarbase | hsa-miR-181a-5p | ERO1A      | 30001     | ENSG00000197930 | validated |
| tarbase | hsa-miR-181a-5p | ZNF823     | 55552     | ENSG00000197933 | validated |
| tarbase | hsa-miR-106b-5p | DNM3       | 26052     | ENSG00000197959 | validated |
| tarbase | hsa-miR-18a-5p  | DNM3       | 26052     | ENSG00000197959 | validated |
| tarbase | hsa-miR-181a-5p | DNM3       | 26052     | ENSG00000197959 | validated |
| tarbase | hsa-miR-212-3p  | DNM3       | 26052     | ENSG00000197959 | validated |
| tarbase | hsa-miR-106b-5p | ZNF121     | 7675      | ENSG00000197961 | validated |
| tarbase | hsa-miR-222-3p  | ZNF121     | 7675      | ENSG00000197961 | validated |
| tarbase | hsa-miR-582-5p  | ZNF121     | 7675      | ENSG00000197961 | validated |
| tarbase | hsa-miR-181a-5p | VPS13A     | 23230     | ENSG00000197969 | validated |
| tarbase | hsa-miR-15b-5p  | MBP        | 4155      | ENSG00000197971 | validated |
| tarbase | hsa-miR-15b-5p  | NOL8       | 55035     | ENSG00000198000 | validated |
| tarbase | hsa-miR-192-5p  | AC093012.1 | 51135     | ENSG00000198001 | validated |
| tarbase | hsa-miR-21-5p   | AC093012.1 | 51135     | ENSG00000198001 | validated |
| tarbase | hsa-miR-212-3p  | CCDC151    | 115948    | ENSG00000198003 | validated |
| tarbase | hsa-miR-181a-5p | DLGAP2     | 9228      | ENSG00000198010 | validated |
| tarbase | hsa-miR-18a-5p  | MRPL42     | 28977     | ENSG00000198015 | validated |
| tarbase | hsa-miR-18a-5p  | ENTPD7     | 57089     | ENSG00000198018 | validated |
| tarbase | hsa-miR-582-5p  | ENTPD7     | 57089     | ENSG00000198018 | validated |
| tarbase | hsa-miR-181a-5p | ZNF273     | 10793     | ENSG00000198039 | validated |
| tarbase | hsa-miR-582-5p  | MAK16      | 84549     | ENSG00000198042 | validated |
| tarbase | hsa-miR-326     | SIRPA      | 140885    | ENSG00000198053 | validated |
| tarbase | hsa-miR-582-3p  | SIRPA      | 140885    | ENSG00000198053 | validated |
| tarbase | hsa-miR-15b-5p  | MARCHF5    | 54708     | ENSG00000198060 | validated |
| tarbase | hsa-miR-212-3p  | AKR1B10    | 57016     | ENSG00000198074 | validated |
| tarbase | hsa-miR-15b-5p  | ZBTB14     | 7541      | ENSG00000198081 | validated |
| tarbase | hsa-miR-106b-5p | CD2AP      | 23607     | ENSG00000198087 | validated |
| tarbase | hsa-miR-181a-5p | CD2AP      | 23607     | ENSG00000198087 | validated |
| tarbase | hsa-miR-21-5p   | CD2AP      | 23607     | ENSG00000198087 | validated |
| tarbase | hsa-miR-301a-3p | CD2AP      | 23607     | ENSG00000198087 | validated |
| tarbase | hsa-miR-301a-3p | ZNF649     | 65251     | ENSG00000198093 | validated |
| tarbase | hsa-miR-181a-5p | LPAR1      | 1902      | ENSG00000198121 | validated |
| tarbase | hsa-miR-15b-5p  | HIBCH      | 26275     | ENSG00000198130 | validated |
| tarbase | hsa-miR-181a-5p | ZNF544     | 27300     | ENSG00000198131 | validated |
| tarbase | hsa-miR-106b-5p | SOWAHC     | 65124     | ENSG00000198142 | validated |
| tarbase | hsa-miR-582-5p  | SOWAHC     | 65124     | ENSG00000198142 | validated |
| tarbase | hsa-miR-301a-3p | MIER1      | 57708     | ENSG00000198160 | validated |
| tarbase | hsa-miR-106b-5p | MAN1A2     | 10905     | ENSG00000198162 | validated |
| tarbase | hsa-miR-15b-5p  | MAN1A2     | 10905     | ENSG00000198162 | validated |
| tarbase | hsa-miR-106b-5p | SVIP       | 258010    | ENSG00000198168 | validated |
| tarbase | hsa-miR-15b-5p  | SVIP       | 258010    | ENSG00000198168 | validated |
| tarbase | hsa-miR-296-5p  | SVIP       | 258010    | ENSG00000198168 | validated |
| tarbase | hsa-miR-181a-5p | ZNF607     | 84775     | ENSG00000198182 | validated |
| tarbase | hsa-miR-222-3p  | ZXDA       | 7789      | ENSG00000198205 | validated |
| tarbase | hsa-miR-18a-5p  | RPS6KL1    | 83694     | ENSG00000198208 | validated |
| tarbase | hsa-miR-18a-5p  | AC092143.1 |           | ENSG00000198211 | validated |
| tarbase | hsa-miR-212-3p  | SLC29A3    | 55315     | ENSG00000198246 | validated |
| tarbase | hsa-miR-106b-5p | STYX       | 6815      | ENSG00000198252 | validated |
| tarbase | hsa-miR-15b-5p  | STYX       | 6815      | ENSG00000198252 | validated |
| tarbase | hsa-miR-106b-5p | HELZ       | 9931      | ENSG00000198265 | validated |
| tarbase | hsa-miR-181a-5p | HELZ       | 9931      | ENSG00000198265 | validated |

|         |                 |          |        |                 |           |
|---------|-----------------|----------|--------|-----------------|-----------|
| tarbase | hsa-miR-192-5p  | HELZ     | 9931   | ENSG00000198265 | validated |
| tarbase | hsa-miR-15b-5p  | UCKL1    | 54963  | ENSG00000198276 | validated |
| tarbase | hsa-miR-212-3p  | ZNF485   | 220992 | ENSG00000198298 | validated |
| tarbase | hsa-miR-181a-5p | PEG3     | 5178   | ENSG00000198300 | validated |
| tarbase | hsa-miR-106b-5p | SDAD1    | 55153  | ENSG00000198301 | validated |
| tarbase | hsa-miR-181a-5p | SDAD1    | 55153  | ENSG00000198301 | validated |
| tarbase | hsa-miR-181a-5p | ZKSCAN8  | 7745   | ENSG00000198315 | validated |
| tarbase | hsa-miR-18a-5p  | ZNF813   | 126017 | ENSG00000198346 | validated |
| tarbase | hsa-miR-181a-5p | PIM3     | 415116 | ENSG00000198355 | validated |
| tarbase | hsa-miR-21-5p   | GET3     | 439    | ENSG00000198356 | validated |
| tarbase | hsa-miR-212-3p  | ASPH     | 444    | ENSG00000198363 | validated |
| tarbase | hsa-miR-222-3p  | ASPH     | 444    | ENSG00000198363 | validated |
| tarbase | hsa-miR-181a-5p | ASPH     | 444    | ENSG00000198363 | validated |
| tarbase | hsa-miR-106b-5p | ASPH     | 444    | ENSG00000198363 | validated |
| tarbase | hsa-miR-106b-5p | GFPT1    | 2673   | ENSG00000198380 | validated |
| tarbase | hsa-miR-15b-5p  | GFPT1    | 2673   | ENSG00000198380 | validated |
| tarbase | hsa-miR-181a-5p | GFPT1    | 2673   | ENSG00000198380 | validated |
| tarbase | hsa-miR-18a-5p  | GFPT1    | 2673   | ENSG00000198380 | validated |
| tarbase | hsa-miR-301a-3p | GFPT1    | 2673   | ENSG00000198380 | validated |
| tarbase | hsa-miR-181a-5p | ZNF26    | 7574   | ENSG00000198393 | validated |
| tarbase | hsa-miR-212-3p  | TMEM207  | 131920 | ENSG00000198398 | validated |
| tarbase | hsa-miR-106b-5p | OGA      | 10724  | ENSG00000198408 | validated |
| tarbase | hsa-miR-18a-5p  | OGA      | 10724  | ENSG00000198408 | validated |
| tarbase | hsa-miR-212-3p  | OGA      | 10724  | ENSG00000198408 | validated |
| tarbase | hsa-miR-21-5p   | OGA      | 10724  | ENSG00000198408 | validated |
| tarbase | hsa-miR-582-3p  | OGA      | 10724  | ENSG00000198408 | validated |
| tarbase | hsa-miR-582-5p  | OGA      | 10724  | ENSG00000198408 | validated |
| tarbase | hsa-miR-15b-5p  | OGA      | 10724  | ENSG00000198408 | validated |
| tarbase | hsa-miR-301a-3p | NRARP    | 441478 | ENSG00000198435 | validated |
| tarbase | hsa-miR-181a-5p | ZNF568   | 374900 | ENSG00000198453 | validated |
| tarbase | hsa-miR-326     | ZNF587   | 84914  | ENSG00000198466 | validated |
| tarbase | hsa-miR-222-3p  | TPM2     | 7169   | ENSG00000198467 | validated |
| tarbase | hsa-miR-15b-5p  | SH3BGRL2 | 83699  | ENSG00000198478 | validated |
| tarbase | hsa-miR-582-3p  | TMA16    | 55319  | ENSG00000198498 | validated |
| tarbase | hsa-miR-106b-5p | TMA16    | 55319  | ENSG00000198498 | validated |
| tarbase | hsa-miR-326     | HLA-DRB5 | 3127   | ENSG00000198502 | validated |
| tarbase | hsa-miR-15b-5p  | ATL1     | 51062  | ENSG00000198513 | validated |
| tarbase | hsa-miR-18a-5p  | MAFK     | 7975   | ENSG00000198517 | validated |
| tarbase | hsa-miR-582-5p  | MAFK     | 7975   | ENSG00000198517 | validated |
| tarbase | hsa-miR-106b-5p | ZNF43    | 7594   | ENSG00000198521 | validated |
| tarbase | hsa-miR-15b-5p  | ZNF43    | 7594   | ENSG00000198521 | validated |
| tarbase | hsa-miR-18a-5p  | ZNF43    | 7594   | ENSG00000198521 | validated |
| tarbase | hsa-miR-106b-5p | C2CD4A   | 145741 | ENSG00000198535 | validated |
| tarbase | hsa-miR-106b-5p | ZNF28    | 7576   | ENSG00000198538 | validated |
| tarbase | hsa-miR-21-5p   | ZNF28    | 7576   | ENSG00000198538 | validated |
| tarbase | hsa-miR-181a-5p | ZNF511   | 118472 | ENSG00000198546 | validated |
| tarbase | hsa-miR-15b-5p  | ZNF627   | 199692 | ENSG00000198551 | validated |
| tarbase | hsa-miR-181a-5p | ZNF627   | 199692 | ENSG00000198551 | validated |
| tarbase | hsa-miR-15b-5p  | WDHD1    | 11169  | ENSG00000198554 | validated |
| tarbase | hsa-miR-212-3p  | WDHD1    | 11169  | ENSG00000198554 | validated |
| tarbase | hsa-miR-106b-5p | CTNND1   | 1500   | ENSG00000198561 | validated |
| tarbase | hsa-miR-301a-3p | CTNND1   | 1500   | ENSG00000198561 | validated |
| tarbase | hsa-miR-582-5p  | CTNND1   | 1500   | ENSG00000198561 | validated |
| tarbase | hsa-miR-106b-5p | DDX39B   | 7919   | ENSG00000198563 | validated |
| tarbase | hsa-miR-181a-5p | DDX39B   | 7919   | ENSG00000198563 | validated |
| tarbase | hsa-miR-582-3p  | DDX39B   | 7919   | ENSG00000198563 | validated |
| tarbase | hsa-miR-18a-5p  | ARC      | 23237  | ENSG00000198576 | validated |
| tarbase | hsa-miR-222-3p  | ARC      | 23237  | ENSG00000198576 | validated |
| tarbase | hsa-miR-18a-5p  | TLK1     | 9874   | ENSG00000198586 | validated |
| tarbase | hsa-miR-222-3p  | TLK1     | 9874   | ENSG00000198586 | validated |
| tarbase | hsa-miR-582-5p  | TLK1     | 9874   | ENSG00000198586 | validated |
| tarbase | hsa-miR-15b-5p  | LRBA     | 987    | ENSG00000198589 | validated |
| tarbase | hsa-miR-212-3p  | ZNF536   | 9745   | ENSG00000198597 | validated |
| tarbase | hsa-miR-326     | BAZ1A    | 11177  | ENSG00000198604 | validated |
| tarbase | hsa-miR-106b-5p | MDM4     | 4194   | ENSG00000198625 | validated |
| tarbase | hsa-miR-181a-5p | MDM4     | 4194   | ENSG00000198625 | validated |
| tarbase | hsa-miR-301a-3p | MDM4     | 4194   | ENSG00000198625 | validated |
| tarbase | hsa-miR-106b-5p | KLHL9    | 55958  | ENSG00000198642 | validated |
| tarbase | hsa-miR-15b-5p  | KLHL9    | 55958  | ENSG00000198642 | validated |
| tarbase | hsa-miR-21-5p   | KLHL9    | 55958  | ENSG00000198642 | validated |
| tarbase | hsa-miR-181a-5p | NCOA6    | 23054  | ENSG00000198646 | validated |



|         |                 |           |        |                 |           |
|---------|-----------------|-----------|--------|-----------------|-----------|
| tarbase | hsa-miR-192-5p  | NCOA6     | 23054  | ENSG00000198646 | validated |
| tarbase | hsa-miR-222-3p  | STK39     | 27347  | ENSG00000198648 | validated |
| tarbase | hsa-miR-181a-5p | C6orf89   | 221477 | ENSG00000198663 | validated |
| tarbase | hsa-miR-222-3p  | C6orf89   | 221477 | ENSG00000198663 | validated |
| tarbase | hsa-miR-582-5p  | C6orf89   | 221477 | ENSG00000198663 | validated |
| tarbase | hsa-miR-106b-5p | CALM1     | 801    | ENSG00000198668 | validated |
| tarbase | hsa-miR-15b-5p  | CALM1     | 801    | ENSG00000198668 | validated |
| tarbase | hsa-miR-181a-5p | CALM1     | 801    | ENSG00000198668 | validated |
| tarbase | hsa-miR-505-3p  | CALM1     | 801    | ENSG00000198668 | validated |
| tarbase | hsa-miR-582-3p  | CALM1     | 801    | ENSG00000198668 | validated |
| tarbase | hsa-miR-181a-5p | TTC37     | 9652   | ENSG00000198677 | validated |
| tarbase | hsa-miR-106b-5p | SLC9A6    | 10479  | ENSG00000198689 | validated |
| tarbase | hsa-miR-181a-5p | SLC9A6    | 10479  | ENSG00000198689 | validated |
| tarbase | hsa-miR-15b-5p  | IPO9      | 55705  | ENSG00000198700 | validated |
| tarbase | hsa-miR-212-3p  | IPO9      | 55705  | ENSG00000198700 | validated |
| tarbase | hsa-miR-296-5p  | IPO9      | 55705  | ENSG00000198700 | validated |
| tarbase | hsa-miR-106b-5p | CEP290    | 80184  | ENSG00000198707 | validated |
| tarbase | hsa-miR-106b-5p | MT-CO2    | 4513   | ENSG00000198712 | validated |
| tarbase | hsa-miR-192-5p  | MT-CO2    | 4513   | ENSG00000198712 | validated |
| tarbase | hsa-miR-15b-5p  | GLMP      | 112770 | ENSG00000198715 | validated |
| tarbase | hsa-miR-212-3p  | TOGARAM1  | 23116  | ENSG00000198718 | validated |
| tarbase | hsa-miR-301a-3p | TOGARAM1  | 23116  | ENSG00000198718 | validated |
| tarbase | hsa-miR-15b-5p  | DLL1      | 28514  | ENSG00000198719 | validated |
| tarbase | hsa-miR-296-5p  | DLL1      | 28514  | ENSG00000198719 | validated |
| tarbase | hsa-miR-301a-3p | DLL1      | 28514  | ENSG00000198719 | validated |
| tarbase | hsa-miR-21-5p   | UNC13B    | 10497  | ENSG00000198722 | validated |
| tarbase | hsa-miR-582-5p  | UNC13B    | 10497  | ENSG00000198722 | validated |
| tarbase | hsa-miR-21-5p   | MT-CYB    | 4519   | ENSG00000198727 | validated |
| tarbase | hsa-miR-15b-5p  | PPP1R14C  | 81706  | ENSG00000198729 | validated |
| tarbase | hsa-miR-212-3p  | ZNF652    | 22834  | ENSG00000198740 | validated |
| tarbase | hsa-miR-106b-5p | SMURF1    | 57154  | ENSG00000198742 | validated |
| tarbase | hsa-miR-212-3p  | SMURF1    | 57154  | ENSG00000198742 | validated |
| tarbase | hsa-miR-326     | SMURF1    | 57154  | ENSG00000198742 | validated |
| tarbase | hsa-miR-582-3p  | SMURF1    | 57154  | ENSG00000198742 | validated |
| tarbase | hsa-miR-15b-5p  | SLC5A3    | 6526   | ENSG00000198743 | validated |
| tarbase | hsa-miR-18a-5p  | SLC5A3    | 6526   | ENSG00000198743 | validated |
| tarbase | hsa-miR-192-5p  | SLC5A3    | 6526   | ENSG00000198743 | validated |
| tarbase | hsa-miR-582-5p  | SLC5A3    | 6526   | ENSG00000198743 | validated |
| tarbase | hsa-miR-212-3p  | EGFL6     | 25975  | ENSG00000198759 | validated |
| tarbase | hsa-miR-106b-5p | MT-ND2    | 4536   | ENSG00000198763 | validated |
| tarbase | hsa-miR-18a-5p  | MT-ND2    | 4536   | ENSG00000198763 | validated |
| tarbase | hsa-miR-21-5p   | MT-ND2    | 4536   | ENSG00000198763 | validated |
| tarbase | hsa-miR-222-3p  | RCSD1     | 92241  | ENSG00000198771 | validated |
| tarbase | hsa-miR-582-3p  | RCSD1     | 92241  | ENSG00000198771 | validated |
| tarbase | hsa-miR-212-3p  | RASSF9    | 9182   | ENSG00000198774 | validated |
| tarbase | hsa-miR-106b-5p | FAM169A   | 26049  | ENSG00000198780 | validated |
| tarbase | hsa-miR-181a-5p | FAM169A   | 26049  | ENSG00000198780 | validated |
| tarbase | hsa-miR-15b-5p  | MT-ND5    | 4540   | ENSG00000198786 | validated |
| tarbase | hsa-miR-181a-5p | MT-ND5    | 4540   | ENSG00000198786 | validated |
| tarbase | hsa-miR-18a-5p  | MT-ND5    | 4540   | ENSG00000198786 | validated |
| tarbase | hsa-miR-21-5p   | MT-ND5    | 4540   | ENSG00000198786 | validated |
| tarbase | hsa-miR-222-3p  | MT-ND5    | 4540   | ENSG00000198786 | validated |
| tarbase | hsa-miR-301a-3p | CNOT7     | 29883  | ENSG00000198791 | validated |
| tarbase | hsa-miR-301a-3p | TMEM184B  | 25829  | ENSG00000198792 | validated |
| tarbase | hsa-miR-212-3p  | ZNF521    | 25925  | ENSG00000198795 | validated |
| tarbase | hsa-miR-181a-5p | LRIG2     | 9860   | ENSG00000198799 | validated |
| tarbase | hsa-miR-106b-5p | MT-CO1    | 4512   | ENSG00000198804 | validated |
| tarbase | hsa-miR-21-5p   | MT-CO1    | 4512   | ENSG00000198804 | validated |
| tarbase | hsa-miR-15b-5p  | PNP       | 4860   | ENSG00000198805 | validated |
| tarbase | hsa-miR-192-5p  | PNP       | 4860   | ENSG00000198805 | validated |
| tarbase | hsa-miR-212-3p  | GK        | 2710   | ENSG00000198814 | validated |
| tarbase | hsa-miR-181a-5p | FOXJ3     | 22887  | ENSG00000198815 | validated |
| tarbase | hsa-miR-181a-5p | SFT2D1    | 113402 | ENSG00000198818 | validated |
| tarbase | hsa-miR-15b-5p  | CHAMP1    | 283489 | ENSG00000198824 | validated |
| tarbase | hsa-miR-301a-3p | INPP5F    | 22876  | ENSG00000198825 | validated |
| tarbase | hsa-miR-106b-5p | ARHGAP11A | 9824   | ENSG00000198826 | validated |
| tarbase | hsa-miR-15b-5p  | ARHGAP11A | 9824   | ENSG00000198826 | validated |
| tarbase | hsa-miR-181a-5p | ARHGAP11A | 9824   | ENSG00000198826 | validated |
| tarbase | hsa-miR-212-3p  | ARHGAP11A | 9824   | ENSG00000198826 | validated |
| tarbase | hsa-miR-15b-5p  | SELENOM   | 140606 | ENSG00000198832 | validated |
| tarbase | hsa-miR-106b-5p | UBE2J1    | 51465  | ENSG00000198833 | validated |

|         |                 |          |        |                 |           |
|---------|-----------------|----------|--------|-----------------|-----------|
| tarbase | hsa-miR-181a-5p | UBE2J1   | 51465  | ENSG00000198833 | validated |
| tarbase | hsa-miR-192-5p  | UBE2J1   | 51465  | ENSG00000198833 | validated |
| tarbase | hsa-miR-222-3p  | UBE2J1   | 51465  | ENSG00000198833 | validated |
| tarbase | hsa-miR-582-3p  | UBE2J1   | 51465  | ENSG00000198833 | validated |
| tarbase | hsa-miR-18a-5p  | OPA1     | 4976   | ENSG00000198836 | validated |
| tarbase | hsa-miR-505-3p  | OPA1     | 4976   | ENSG00000198836 | validated |
| tarbase | hsa-miR-15b-5p  | DENND4B  | 9909   | ENSG00000198837 | validated |
| tarbase | hsa-miR-301a-3p | DENND4B  | 9909   | ENSG00000198837 | validated |
| tarbase | hsa-miR-15b-5p  | ZNF277   | 11179  | ENSG00000198839 | validated |
| tarbase | hsa-miR-582-3p  | SELENOT  | 51714  | ENSG00000198843 | validated |
| tarbase | hsa-miR-181a-5p | ARHGEF15 | 22899  | ENSG00000198844 | validated |
| tarbase | hsa-miR-296-5p  | RUSC2    | 9853   | ENSG00000198853 | validated |
| tarbase | hsa-miR-21-5p   | FICD     | 11153  | ENSG00000198855 | validated |
| tarbase | hsa-miR-301a-3p | FICD     | 11153  | ENSG00000198855 | validated |
| tarbase | hsa-miR-21-5p   | OSTC     | 58505  | ENSG00000198856 | validated |
| tarbase | hsa-miR-21-5p   | LTN1     | 26046  | ENSG00000198862 | validated |
| tarbase | hsa-miR-301a-3p | DCAF12   | 25853  | ENSG00000198876 | validated |
| tarbase | hsa-miR-181a-5p | MT-ND4   | 4538   | ENSG00000198886 | validated |
| tarbase | hsa-miR-18a-5p  | MT-ND4   | 4538   | ENSG00000198886 | validated |
| tarbase | hsa-miR-21-5p   | MT-ND4   | 4538   | ENSG00000198886 | validated |
| tarbase | hsa-miR-222-3p  | MT-ND4   | 4538   | ENSG00000198886 | validated |
| tarbase | hsa-miR-21-5p   | SMC5     | 23137  | ENSG00000198887 | validated |
| tarbase | hsa-miR-181a-5p | MT-ND1   | 4535   | ENSG00000198888 | validated |
| tarbase | hsa-miR-212-3p  | CAPZA2   | 830    | ENSG00000198898 | validated |
| tarbase | hsa-miR-18a-5p  | MT-ATP6  | 4508   | ENSG00000198899 | validated |
| tarbase | hsa-miR-192-5p  | MT-ATP6  | 4508   | ENSG00000198899 | validated |
| tarbase | hsa-miR-21-5p   | MT-ATP6  | 4508   | ENSG00000198899 | validated |
| tarbase | hsa-miR-15b-5p  | TOP1     | 7150   | ENSG00000198900 | validated |
| tarbase | hsa-miR-222-3p  | TOP1     | 7150   | ENSG00000198900 | validated |
| tarbase | hsa-miR-582-5p  | TOP1     | 7150   | ENSG00000198900 | validated |
| tarbase | hsa-miR-15b-5p  | PRC1     | 9055   | ENSG00000198901 | validated |
| tarbase | hsa-miR-21-5p   | PRC1     | 9055   | ENSG00000198901 | validated |
| tarbase | hsa-miR-212-3p  | PRC1     | 9055   | ENSG00000198901 | validated |
| tarbase | hsa-miR-181a-5p | BHLHB9   | 80823  | ENSG00000198908 | validated |
| tarbase | hsa-miR-582-5p  | BHLHB9   | 80823  | ENSG00000198908 | validated |
| tarbase | hsa-miR-212-3p  | MAP3K3   | 4215   | ENSG00000198909 | validated |
| tarbase | hsa-miR-181a-5p | L1CAM    | 3897   | ENSG00000198910 | validated |
| tarbase | hsa-miR-181a-5p | SREBF2   | 6721   | ENSG00000198911 | validated |
| tarbase | hsa-miR-21-5p   | SREBF2   | 6721   | ENSG00000198911 | validated |
| tarbase | hsa-miR-326     | ATG9A    | 79065  | ENSG00000198925 | validated |
| tarbase | hsa-miR-192-5p  | TBKBP1   | 9755   | ENSG00000198933 | validated |
| tarbase | hsa-miR-326     | TBKBP1   | 9755   | ENSG00000198933 | validated |
| tarbase | hsa-miR-15b-5p  | MT-CO3   | 4514   | ENSG00000198938 | validated |
| tarbase | hsa-miR-18a-5p  | MT-CO3   | 4514   | ENSG00000198938 | validated |
| tarbase | hsa-miR-21-5p   | MT-CO3   | 4514   | ENSG00000198938 | validated |
| tarbase | hsa-miR-212-3p  | ZFP2     | 80108  | ENSG00000198939 | validated |
| tarbase | hsa-miR-181a-5p | SOWAHA   | 134548 | ENSG00000198944 | validated |
| tarbase | hsa-miR-212-3p  | SOWAHA   | 134548 | ENSG00000198944 | validated |
| tarbase | hsa-miR-192-5p  | DMD      | 1756   | ENSG00000198947 | validated |
| tarbase | hsa-miR-106b-5p | MFAP3L   | 9848   | ENSG00000198948 | validated |
| tarbase | hsa-miR-18a-5p  | MFAP3L   | 9848   | ENSG00000198948 | validated |
| tarbase | hsa-miR-21-5p   | PJA2     | 9867   | ENSG00000198961 | validated |
| tarbase | hsa-miR-181a-5p | RORB     | 6096   | ENSG00000198963 | validated |
| tarbase | hsa-miR-301a-3p | RORB     | 6096   | ENSG00000198963 | validated |
| tarbase | hsa-miR-582-5p  | RORB     | 6096   | ENSG00000198963 | validated |
| tarbase | hsa-miR-212-3p  | SGMS1    | 259230 | ENSG00000198964 | validated |
| tarbase | hsa-miR-18a-5p  | CHML     | 1122   | ENSG00000203668 | validated |
| tarbase | hsa-miR-181a-5p | CHML     | 1122   | ENSG00000203668 | validated |
| tarbase | hsa-miR-212-3p  | CAPN8    | 388743 | ENSG00000203697 | validated |
| tarbase | hsa-miR-212-3p  | PRR9     | 574414 | ENSG00000203783 | validated |
| tarbase | hsa-miR-212-3p  | RIPPLY2  | 134701 | ENSG00000203877 | validated |
| tarbase | hsa-miR-181a-5p | GDI1     | 2664   | ENSG00000203879 | validated |
| tarbase | hsa-miR-18a-5p  | PCMTD2   | 55251  | ENSG00000203880 | validated |
| tarbase | hsa-miR-15b-5p  | OOEP     | 441161 | ENSG00000203907 | validated |
| tarbase | hsa-miR-21-5p   | EFCAB7   | 84455  | ENSG00000203965 | validated |
| tarbase | hsa-miR-212-3p  | EFCAB7   | 84455  | ENSG00000203965 | validated |
| tarbase | hsa-miR-15b-5p  | SYS1     | 90196  | ENSG00000204070 | validated |
| tarbase | hsa-miR-106b-5p | GIGYF2   | 26058  | ENSG00000204120 | validated |
| tarbase | hsa-miR-21-5p   | GIGYF2   | 26058  | ENSG00000204120 | validated |
| tarbase | hsa-miR-505-3p  | C2orf72  | 257407 | ENSG00000204128 | validated |
| tarbase | hsa-miR-181a-5p | RUFY2    | 55680  | ENSG00000204130 | validated |

|         |                 |           |           |                 |           |
|---------|-----------------|-----------|-----------|-----------------|-----------|
| tarbase | hsa-miR-296-5p  | ZDHHC18   | 84243     | ENSG00000204160 | validated |
| tarbase | hsa-miR-222-3p  | BMP2R2    | 659       | ENSG00000204217 | validated |
| tarbase | hsa-miR-301a-3p | BMP2R2    | 659       | ENSG00000204217 | validated |
| tarbase | hsa-miR-222-3p  | PFDN6     | 10471     | ENSG00000204220 | validated |
| tarbase | hsa-miR-181a-5p | PFDN6     | 10471     | ENSG00000204220 | validated |
| tarbase | hsa-miR-15b-5p  | BRD2      | 6046      | ENSG00000204256 | validated |
| tarbase | hsa-miR-222-3p  | BRD2      | 6046      | ENSG00000204256 | validated |
| tarbase | hsa-miR-301a-3p | BRD2      | 6046      | ENSG00000204256 | validated |
| tarbase | hsa-miR-212-3p  | COL5A2    | 1290      | ENSG00000204262 | validated |
| tarbase | hsa-miR-212-3p  | PSMB8     | 5696      | ENSG00000204264 | validated |
| tarbase | hsa-miR-212-3p  | TAP2      | 6891      | ENSG00000204267 | validated |
| tarbase | hsa-miR-144-3p  | PBX2      | 5089      | ENSG00000204304 | validated |
| tarbase | hsa-miR-15b-5p  | AGPAT1    | 10554     | ENSG00000204310 | validated |
| tarbase | hsa-miR-15b-5p  | STK19     | 8859      | ENSG00000204344 | validated |
| tarbase | hsa-miR-21-5p   | DXO       | 1797      | ENSG00000204348 | validated |
| tarbase | hsa-miR-582-3p  | SKIV2L    | 6499      | ENSG00000204351 | validated |
| tarbase | hsa-miR-106b-5p | ZBTB12    | 221527    | ENSG00000204366 | validated |
| tarbase | hsa-miR-181a-5p | SNHG32    |           | ENSG00000204387 | validated |
| tarbase | hsa-miR-18a-5p  | SNHG32    |           | ENSG00000204387 | validated |
| tarbase | hsa-miR-212-3p  | SNHG32    |           | ENSG00000204387 | validated |
| tarbase | hsa-miR-144-3p  | HSPA1B    | 3304      | ENSG00000204388 | validated |
| tarbase | hsa-miR-192-5p  | HSPA1A    | 3303      | ENSG00000204389 | validated |
| tarbase | hsa-miR-21-5p   | VARS1     | 7407      | ENSG00000204394 | validated |
| tarbase | hsa-miR-15b-5p  | BAG6      | 7917      | ENSG00000204463 | validated |
| tarbase | hsa-miR-21-5p   | BAG6      | 7917      | ENSG00000204463 | validated |
| tarbase | hsa-miR-192-5p  | PRRC2A    | 7916      | ENSG00000204469 | validated |
| tarbase | hsa-miR-212-3p  | PRRC2A    | 7916      | ENSG00000204469 | validated |
| tarbase | hsa-miR-296-5p  | PRRC2A    | 7916      | ENSG00000204469 | validated |
| tarbase | hsa-miR-301a-3p | PRRC2A    | 7916      | ENSG00000204469 | validated |
| tarbase | hsa-miR-505-3p  | PRRC2A    | 7916      | ENSG00000204469 | validated |
| tarbase | hsa-miR-582-3p  | PRRC2A    | 7916      | ENSG00000204469 | validated |
| tarbase | hsa-miR-15b-5p  | NFKBIL1   | 4795      | ENSG00000204498 | validated |
| tarbase | hsa-miR-192-5p  | NFKBIL1   | 4795      | ENSG00000204498 | validated |
| tarbase | hsa-miR-181a-5p | MICB      | 4277      | ENSG00000204516 | validated |
| tarbase | hsa-miR-106b-5p | MICA      | 100507436 | ENSG00000204520 | validated |
| tarbase | hsa-miR-15b-5p  | MICA      | 100507436 | ENSG00000204520 | validated |
| tarbase | hsa-miR-144-3p  | ZNF805    | 390980    | ENSG00000204524 | validated |
| tarbase | hsa-miR-296-5p  | HLA-C     | 3107      | ENSG00000204525 | validated |
| tarbase | hsa-miR-181a-5p | POU5F1    | 5460      | ENSG00000204531 | validated |
| tarbase | hsa-miR-212-3p  | DEFB121   | 245934    | ENSG00000204548 | validated |
| tarbase | hsa-miR-181a-5p | MRPS18B   | 28973     | ENSG00000204568 | validated |
| tarbase | hsa-miR-296-5p  | PPP1R10   | 5514      | ENSG00000204569 | validated |
| tarbase | hsa-miR-301a-3p | PPP1R10   | 5514      | ENSG00000204569 | validated |
| tarbase | hsa-miR-15b-5p  | ABCF1     | 23        | ENSG00000204574 | validated |
| tarbase | hsa-miR-15b-5p  | PRR3      | 80742     | ENSG00000204576 | validated |
| tarbase | hsa-miR-181a-5p | PRR3      | 80742     | ENSG00000204576 | validated |
| tarbase | hsa-miR-15b-5p  | DDR1      | 780       | ENSG00000204580 | validated |
| tarbase | hsa-miR-296-5p  | DDR1      | 780       | ENSG00000204580 | validated |
| tarbase | hsa-miR-296-5p  | HLA-E     | 3133      | ENSG00000204592 | validated |
| tarbase | hsa-miR-222-3p  | ZNF616    | 90317     | ENSG00000204611 | validated |
| tarbase | hsa-miR-212-3p  | PPP1R11   | 6992      | ENSG00000204619 | validated |
| tarbase | hsa-miR-296-5p  | PPP1R11   | 6992      | ENSG00000204619 | validated |
| tarbase | hsa-miR-296-5p  | DISP3     | 57540     | ENSG00000204624 | validated |
| tarbase | hsa-miR-15b-5p  | RACK1     | 10399     | ENSG00000204628 | validated |
| tarbase | hsa-miR-212-3p  | RACK1     | 10399     | ENSG00000204628 | validated |
| tarbase | hsa-miR-21-5p   | RACK1     | 10399     | ENSG00000204628 | validated |
| tarbase | hsa-miR-326     | RACK1     | 10399     | ENSG00000204628 | validated |
| tarbase | hsa-miR-212-3p  | HLA-F     | 3134      | ENSG00000204642 | validated |
| tarbase | hsa-miR-296-5p  | GABBR1    | 2550      | ENSG00000204681 | validated |
| tarbase | hsa-miR-18a-5p  | TRIM27    | 5987      | ENSG00000204713 | validated |
| tarbase | hsa-miR-212-3p  | TTC25     | 83538     | ENSG00000204815 | validated |
| tarbase | hsa-miR-301a-3p | ATXN2     | 6311      | ENSG00000204842 | validated |
| tarbase | hsa-miR-181a-5p | ZBTB48    | 3104      | ENSG00000204859 | validated |
| tarbase | hsa-miR-106b-5p | MZT1      | 440145    | ENSG00000204899 | validated |
| tarbase | hsa-miR-301a-3p | MZT1      | 440145    | ENSG00000204899 | validated |
| tarbase | hsa-miR-326     | MZT1      | 440145    | ENSG00000204899 | validated |
| tarbase | hsa-miR-505-3p  | MZT1      | 440145    | ENSG00000204899 | validated |
| tarbase | hsa-miR-181a-5p | MZT1      | 440145    | ENSG00000204899 | validated |
| tarbase | hsa-miR-212-3p  | LINC01545 |           | ENSG00000204904 | validated |
| tarbase | hsa-miR-212-3p  | FAM221B   | 392307    | ENSG00000204930 | validated |
| tarbase | hsa-miR-582-3p  | PCDHGA1   | 56114     | ENSG00000204956 | validated |

|         |                 |          |           |                 |           |
|---------|-----------------|----------|-----------|-----------------|-----------|
| tarbase | hsa-miR-15b-5p  | PCDHA9   | 9752      | ENSG00000204961 | validated |
| tarbase | hsa-miR-18a-5p  | PCDHA9   | 9752      | ENSG00000204961 | validated |
| tarbase | hsa-miR-21-5p   | PCDHA9   | 9752      | ENSG00000204961 | validated |
| tarbase | hsa-miR-181a-5p | PCDHA9   | 9752      | ENSG00000204961 | validated |
| tarbase | hsa-miR-326     | PRSS1    | 5644      | ENSG00000204983 | validated |
| tarbase | hsa-miR-15b-5p  | SPIRE2   | 84501     | ENSG00000204991 | validated |
| tarbase | hsa-miR-144-3p  | SLC35B4  | 84912     | ENSG00000205060 | validated |
| tarbase | hsa-miR-18a-5p  | SLC35B4  | 84912     | ENSG00000205060 | validated |
| tarbase | hsa-miR-18a-5p  | TRIQQ    | 286144    | ENSG00000205133 | validated |
| tarbase | hsa-miR-106b-5p | ZBTB10   | 65986     | ENSG00000205189 | validated |
| tarbase | hsa-miR-212-3p  | ZBTB10   | 65986     | ENSG00000205189 | validated |
| tarbase | hsa-miR-222-3p  | ZBTB10   | 65986     | ENSG00000205189 | validated |
| tarbase | hsa-miR-326     | ZBTB10   | 65986     | ENSG00000205189 | validated |
| tarbase | hsa-miR-106b-5p | LGR4     | 55366     | ENSG00000205213 | validated |
| tarbase | hsa-miR-144-3p  | LGR4     | 55366     | ENSG00000205213 | validated |
| tarbase | hsa-miR-18a-5p  | LGR4     | 55366     | ENSG00000205213 | validated |
| tarbase | hsa-miR-212-3p  | LGR4     | 55366     | ENSG00000205213 | validated |
| tarbase | hsa-miR-106b-5p | PDE7A    | 5150      | ENSG00000205268 | validated |
| tarbase | hsa-miR-15b-5p  | PDE7A    | 5150      | ENSG00000205268 | validated |
| tarbase | hsa-miR-212-3p  | PDE7A    | 5150      | ENSG00000205268 | validated |
| tarbase | hsa-miR-582-5p  | PDE7A    | 5150      | ENSG00000205268 | validated |
| tarbase | hsa-miR-18a-5p  | TMEM170B | 100113407 | ENSG00000205269 | validated |
| tarbase | hsa-miR-296-5p  | TMEM170B | 100113407 | ENSG00000205269 | validated |
| tarbase | hsa-miR-212-3p  | TMEM170B | 100113407 | ENSG00000205269 | validated |
| tarbase | hsa-miR-181a-5p | TMEM170B | 100113407 | ENSG00000205269 | validated |
| tarbase | hsa-miR-301a-3p | SNX2     | 6643      | ENSG00000205302 | validated |
| tarbase | hsa-miR-582-3p  | SNX2     | 6643      | ENSG00000205302 | validated |
| tarbase | hsa-miR-15b-5p  | IPO7     | 10527     | ENSG00000205339 | validated |
| tarbase | hsa-miR-181a-5p | IPO7     | 10527     | ENSG00000205339 | validated |
| tarbase | hsa-miR-18a-5p  | IPO7     | 10527     | ENSG00000205339 | validated |
| tarbase | hsa-miR-212-3p  | IPO7     | 10527     | ENSG00000205339 | validated |
| tarbase | hsa-miR-21-5p   | IPO7     | 10527     | ENSG00000205339 | validated |
| tarbase | hsa-miR-582-3p  | IPO7     | 10527     | ENSG00000205339 | validated |
| tarbase | hsa-miR-181a-5p | SAMD9    | 54809     | ENSG00000205413 | validated |
| tarbase | hsa-miR-212-3p  | SAMD9    | 54809     | ENSG00000205413 | validated |
| tarbase | hsa-miR-106b-5p | CNEP1R1  | 255919    | ENSG00000205423 | validated |
| tarbase | hsa-miR-181a-5p | CNEP1R1  | 255919    | ENSG00000205423 | validated |
| tarbase | hsa-miR-212-3p  | KRT81    | 3887      | ENSG00000205426 | validated |
| tarbase | hsa-miR-15b-5p  | CCDC85C  | 317762    | ENSG00000205476 | validated |
| tarbase | hsa-miR-192-5p  | NAP1L4   | 4676      | ENSG00000205531 | validated |
| tarbase | hsa-miR-181a-5p | TMSB4X   | 7114      | ENSG00000205542 | validated |
| tarbase | hsa-miR-192-5p  | HMGN1    | 3150      | ENSG00000205581 | validated |
| tarbase | hsa-miR-181a-5p | LCMT1    | 51451     | ENSG00000205629 | validated |
| tarbase | hsa-miR-582-5p  | LIN52    | 91750     | ENSG00000205659 | validated |
| tarbase | hsa-miR-181a-5p | ETFRF1   | 144363    | ENSG00000205707 | validated |
| tarbase | hsa-miR-582-3p  | ITSN1    | 6453      | ENSG00000205726 | validated |
| tarbase | hsa-miR-15b-5p  | ITSN1    | 6453      | ENSG00000205726 | validated |
| tarbase | hsa-miR-21-5p   | ITPRIPL2 | 162073    | ENSG00000205730 | validated |
| tarbase | hsa-miR-15b-5p  | C5orf51  | 285636    | ENSG00000205765 | validated |
| tarbase | hsa-miR-181a-5p | C5orf51  | 285636    | ENSG00000205765 | validated |
| tarbase | hsa-miR-192-5p  | C5orf51  | 285636    | ENSG00000205765 | validated |
| tarbase | hsa-miR-212-3p  | CYS1     | 192668    | ENSG00000205795 | validated |
| tarbase | hsa-miR-15b-5p  | PLPP6    | 403313    | ENSG00000205808 | validated |
| tarbase | hsa-miR-296-5p  | ZNF316   | 100131017 | ENSG00000205903 | validated |
| tarbase | hsa-miR-181a-5p | JPT2     | 90861     | ENSG00000206053 | validated |
| tarbase | hsa-miR-21-5p   | JPT2     | 90861     | ENSG00000206053 | validated |
| tarbase | hsa-miR-582-3p  | JPT2     | 90861     | ENSG00000206053 | validated |
| tarbase | hsa-miR-212-3p  | RAB12    | 201475    | ENSG00000206418 | validated |
| tarbase | hsa-miR-301a-3p | RAB12    | 201475    | ENSG00000206418 | validated |
| tarbase | hsa-miR-21-5p   | HACD2    | 201562    | ENSG00000206527 | validated |
| tarbase | hsa-miR-212-3p  | CFAP44   | 55779     | ENSG00000206530 | validated |
| tarbase | hsa-miR-106b-5p | VGLL3    | 389136    | ENSG00000206538 | validated |
| tarbase | hsa-miR-505-3p  | VGLL3    | 389136    | ENSG00000206538 | validated |
| tarbase | hsa-miR-15b-5p  | TRIM71   | 131405    | ENSG00000206557 | validated |
| tarbase | hsa-miR-181a-5p | TRIM71   | 131405    | ENSG00000206557 | validated |
| tarbase | hsa-miR-21-5p   | TRIM71   | 131405    | ENSG00000206557 | validated |
| tarbase | hsa-miR-222-3p  | TRIM71   | 131405    | ENSG00000206557 | validated |
| tarbase | hsa-miR-212-3p  | TRIM71   | 131405    | ENSG00000206557 | validated |
| tarbase | hsa-miR-15b-5p  | ANKRD28  | 23243     | ENSG00000206560 | validated |
| tarbase | hsa-miR-296-5p  | COLQ     | 8292      | ENSG00000206561 | validated |
| tarbase | hsa-miR-21-5p   | STK38L   | 23012     | ENSG00000211455 | validated |

|         |                 |           |        |                 |           |
|---------|-----------------|-----------|--------|-----------------|-----------|
| tarbase | hsa-miR-15b-5p  | SACM1L    | 22908  | ENSG00000211456 | validated |
| tarbase | hsa-miR-582-5p  | SACM1L    | 22908  | ENSG00000211456 | validated |
| tarbase | hsa-miR-181a-5p | SACM1L    | 22908  | ENSG00000211456 | validated |
| tarbase | hsa-miR-106b-5p | TSN       | 7247   | ENSG00000211460 | validated |
| tarbase | hsa-miR-15b-5p  | TSN       | 7247   | ENSG00000211460 | validated |
| tarbase | hsa-miR-18a-5p  | TSN       | 7247   | ENSG00000211460 | validated |
| tarbase | hsa-miR-21-5p   | TSN       | 7247   | ENSG00000211460 | validated |
| tarbase | hsa-miR-582-3p  | TSN       | 7247   | ENSG00000211460 | validated |
| tarbase | hsa-miR-106b-5p | SLC48A1   | 55652  | ENSG00000211584 | validated |
| tarbase | hsa-miR-181a-5p | LINC02693 |        | ENSG00000212719 | validated |
| tarbase | hsa-miR-18a-5p  | LINC02693 |        | ENSG00000212719 | validated |
| tarbase | hsa-miR-301a-3p | LINC02693 |        | ENSG00000212719 | validated |
| tarbase | hsa-miR-106b-5p | MT-ND4L   | 4539   | ENSG00000212907 | validated |
| tarbase | hsa-miR-15b-5p  | ZNF580    | 51157  | ENSG00000213015 | validated |
| tarbase | hsa-miR-326     | ZNF580    | 51157  | ENSG00000213015 | validated |
| tarbase | hsa-miR-106b-5p | NUP62     | 23636  | ENSG00000213024 | validated |
| tarbase | hsa-miR-212-3p  | DENND1B   | 163486 | ENSG00000213047 | validated |
| tarbase | hsa-miR-21-5p   | DENND1B   | 163486 | ENSG00000213047 | validated |
| tarbase | hsa-miR-106b-5p | SFT2D2    | 375035 | ENSG00000213064 | validated |
| tarbase | hsa-miR-181a-5p | SFT2D2    | 375035 | ENSG00000213064 | validated |
| tarbase | hsa-miR-21-5p   | SFT2D2    | 375035 | ENSG00000213064 | validated |
| tarbase | hsa-miR-222-3p  | SFT2D2    | 375035 | ENSG00000213064 | validated |
| tarbase | hsa-miR-301a-3p | SFT2D2    | 375035 | ENSG00000213064 | validated |
| tarbase | hsa-miR-582-3p  | SFT2D2    | 375035 | ENSG00000213064 | validated |
| tarbase | hsa-miR-15b-5p  | SCAF8     | 22828  | ENSG00000213079 | validated |
| tarbase | hsa-miR-222-3p  | SCAF8     | 22828  | ENSG00000213079 | validated |
| tarbase | hsa-miR-212-3p  | ACKR1     | 2532   | ENSG00000213088 | validated |
| tarbase | hsa-miR-212-3p  | TCTEX1D2  | 255758 | ENSG00000213123 | validated |
| tarbase | hsa-miR-18a-5p  |           |        | ENSG00000213160 | validated |
| tarbase | hsa-miR-106b-5p | TRIM59    | 286827 | ENSG00000213186 | validated |
| tarbase | hsa-miR-18a-5p  | SUPT4H1   | 6827   | ENSG00000213246 | validated |
| tarbase | hsa-miR-192-5p  | SUPT4H1   | 6827   | ENSG00000213246 | validated |
| tarbase | hsa-miR-106b-5p | NRAS      | 4893   | ENSG00000213281 | validated |
| tarbase | hsa-miR-21-5p   | NRAS      | 4893   | ENSG00000213281 | validated |
| tarbase | hsa-miR-15b-5p  | CHUK      | 1147   | ENSG00000213341 | validated |
| tarbase | hsa-miR-181a-5p | CHUK      | 1147   | ENSG00000213341 | validated |
| tarbase | hsa-miR-301a-3p | CHUK      | 1147   | ENSG00000213341 | validated |
| tarbase | hsa-miR-21-5p   | CHUK      | 1147   | ENSG00000213341 | validated |
| tarbase | hsa-miR-582-5p  | COG8      | 84342  | ENSG00000213380 | validated |
| tarbase | hsa-miR-301a-3p | LCAT      | 3931   | ENSG00000213398 | validated |
| tarbase | hsa-miR-582-5p  | MAGEA12   | 4111   | ENSG00000213401 | validated |
| tarbase | hsa-miR-106b-5p | MAGEA12   | 4111   | ENSG00000213401 | validated |
| tarbase | hsa-miR-15b-5p  | ARL2      | 402    | ENSG00000213465 | validated |
| tarbase | hsa-miR-582-3p  | DNAJC9    | 23234  | ENSG00000213551 | validated |
| tarbase | hsa-miR-21-5p   | VDAC1     | 7416   | ENSG00000213585 | validated |
| tarbase | hsa-miR-582-5p  | VDAC1     | 7416   | ENSG00000213585 | validated |
| tarbase | hsa-miR-18a-5p  | ZBTB9     | 221504 | ENSG00000213588 | validated |
| tarbase | hsa-miR-222-3p  | LEPROT    | 54741  | ENSG00000213625 | validated |
| tarbase | hsa-miR-181a-5p | LEPROT    | 54741  | ENSG00000213625 | validated |
| tarbase | hsa-miR-181a-5p | PPP1CB    | 5500   | ENSG00000213639 | validated |
| tarbase | hsa-miR-582-3p  | PPP1CB    | 5500   | ENSG00000213639 | validated |
| tarbase | hsa-miR-326     | NCKIPSD   | 51517  | ENSG00000213672 | validated |
| tarbase | hsa-miR-222-3p  | SLC35F6   | 54978  | ENSG00000213699 | validated |
| tarbase | hsa-miR-212-3p  | CLIC1     | 1192   | ENSG00000213719 | validated |
| tarbase | hsa-miR-15b-5p  | DDAH2     | 23564  | ENSG00000213722 | validated |
| tarbase | hsa-miR-296-5p  | DDAH2     | 23564  | ENSG00000213722 | validated |
| tarbase | hsa-miR-192-5p  | RPS29     | 6235   | ENSG00000213741 | validated |
| tarbase | hsa-miR-301a-3p | RPS29     | 6235   | ENSG00000213741 | validated |
| tarbase | hsa-miR-106b-5p | ZNF134    | 7693   | ENSG00000213762 | validated |
| tarbase | hsa-miR-181a-5p | ZNF134    | 7693   | ENSG00000213762 | validated |
| tarbase | hsa-miR-18a-5p  | ZNF134    | 7693   | ENSG00000213762 | validated |
| tarbase | hsa-miR-301a-3p | ZNF134    | 7693   | ENSG00000213762 | validated |
| tarbase | hsa-miR-18a-5p  | EMP2      | 2013   | ENSG00000213853 | validated |
| tarbase | hsa-miR-301a-3p | EMP2      | 2013   | ENSG00000213853 | validated |
| tarbase | hsa-miR-15b-5p  | LTB4R2    | 56413  | ENSG00000213906 | validated |
| tarbase | hsa-miR-18a-5p  | LTB4R2    | 56413  | ENSG00000213906 | validated |
| tarbase | hsa-miR-326     | CSNK1E    | 1454   | ENSG00000213923 | validated |
| tarbase | hsa-miR-212-3p  | IRF9      | 10379  | ENSG00000213928 | validated |
| tarbase | hsa-miR-106b-5p | NUDT19    | 390916 | ENSG00000213965 | validated |
| tarbase | hsa-miR-181a-5p | NUDT19    | 390916 | ENSG00000213965 | validated |
| tarbase | hsa-miR-21-5p   | ZNF726    | 730087 | ENSG00000213967 | validated |

|         |                 |            |           |                 |           |
|---------|-----------------|------------|-----------|-----------------|-----------|
| tarbase | hsa-miR-505-3p  | NAXD       | 55739     | ENSG00000213995 | validated |
| tarbase | hsa-miR-15b-5p  | REPIN1     | 29803     | ENSG00000214022 | validated |
| tarbase | hsa-miR-582-5p  | ZNF891     | 101060200 | ENSG00000214029 | validated |
| tarbase | hsa-miR-212-3p  | ZNF891     | 101060200 | ENSG00000214029 | validated |
| tarbase | hsa-miR-106b-5p | CPNE1      | 8904      | ENSG00000214078 | validated |
| tarbase | hsa-miR-21-5p   | CPNE1      | 8904      | ENSG00000214078 | validated |
| tarbase | hsa-miR-212-3p  | MYCBP      | 26292     | ENSG00000214114 | validated |
| tarbase | hsa-miR-181a-5p | ZNF788P    |           | ENSG00000214189 | validated |
| tarbase | hsa-miR-21-5p   | FIS1       | 51024     | ENSG00000214253 | validated |
| tarbase | hsa-miR-21-5p   | HAUS3      | 79441     | ENSG00000214367 | validated |
| tarbase | hsa-miR-106b-5p | BBIP1      | 92482     | ENSG00000214413 | validated |
| tarbase | hsa-miR-15b-5p  | PPME1      | 51400     | ENSG00000214517 | validated |
| tarbase | hsa-miR-296-5p  | ZSWIM8     | 23053     | ENSG00000214655 | validated |
| tarbase | hsa-miR-18a-5p  | ZSWIM8     | 23053     | ENSG00000214655 | validated |
| tarbase | hsa-miR-21-5p   | ZSWIM8     | 23053     | ENSG00000214655 | validated |
| tarbase | hsa-miR-106b-5p | IFRD2      | 7866      | ENSG00000214706 | validated |
| tarbase | hsa-miR-192-5p  | TOMM6      | 100188893 | ENSG00000214736 | validated |
| tarbase | hsa-miR-21-5p   | TOMM6      | 100188893 | ENSG00000214736 | validated |
| tarbase | hsa-miR-15b-5p  | HNRNPUL2   | 221092    | ENSG00000214753 | validated |
| tarbase | hsa-miR-181a-5p | ARHGFE28   | 64283     | ENSG00000214944 | validated |
| tarbase | hsa-miR-21-5p   | BRD2       | 6046      | ENSG00000215077 | validated |
| tarbase | hsa-miR-222-3p  | UBXN2B     | 137886    | ENSG00000215114 | validated |
| tarbase | hsa-miR-15b-5p  | UBE2QL1    | 134111    | ENSG00000215218 | validated |
| tarbase | hsa-miR-181a-5p | UBE2QL1    | 134111    | ENSG00000215218 | validated |
| tarbase | hsa-miR-181a-5p | FASTKD5    | 60493     | ENSG00000215251 | validated |
| tarbase | hsa-miR-144-3p  | DDX3X      | 1654      | ENSG00000215301 | validated |
| tarbase | hsa-miR-222-3p  | DDX3X      | 1654      | ENSG00000215301 | validated |
| tarbase | hsa-miR-582-3p  | DDX3X      | 1654      | ENSG00000215301 | validated |
| tarbase | hsa-miR-582-5p  | DDX3X      | 1654      | ENSG00000215301 | validated |
| tarbase | hsa-miR-18a-5p  | DDX3X      | 1654      | ENSG00000215301 | validated |
| tarbase | hsa-miR-222-3p  | VPS16      | 64601     | ENSG00000215305 | validated |
| tarbase | hsa-miR-212-3p  | MYL5       | 4636      | ENSG00000215375 | validated |
| tarbase | hsa-miR-301a-3p | NPEPL1     | 79716     | ENSG00000215440 | validated |
| tarbase | hsa-miR-15b-5p  | TMEM167B   | 56900     | ENSG00000215717 | validated |
| tarbase | hsa-miR-21-5p   | TMEM167B   | 56900     | ENSG00000215717 | validated |
| tarbase | hsa-miR-15b-5p  | IFI30      | 10437     | ENSG00000216490 | validated |
| tarbase | hsa-miR-301a-3p | IFI30      | 10437     | ENSG00000216490 | validated |
| tarbase | hsa-miR-192-5p  | CCDC7      | 79741     | ENSG00000216937 | validated |
| tarbase | hsa-miR-15b-5p  | FNIP1      | 96459     | ENSG00000217128 | validated |
| tarbase | hsa-miR-212-3p  | FNIP1      | 96459     | ENSG00000217128 | validated |
| tarbase | hsa-miR-192-5p  | SP9        | 100131390 | ENSG00000217236 | validated |
| tarbase | hsa-miR-301a-3p | TENM3      | 55714     | ENSG00000218336 | validated |
| tarbase | hsa-miR-212-3p  | AC110619.1 |           | ENSG00000218416 | validated |
| tarbase | hsa-miR-15b-5p  | NBPF1      | 55672     | ENSG00000219481 | validated |
| tarbase | hsa-miR-21-5p   | NBPF1      | 55672     | ENSG00000219481 | validated |
| tarbase | hsa-miR-106b-5p | FAM228B    | 375190    | ENSG00000219626 | validated |
| tarbase | hsa-miR-212-3p  | FAM228B    | 375190    | ENSG00000219626 | validated |
| tarbase | hsa-miR-21-5p   | ZGLP1      | 100125288 | ENSG00000220201 | validated |
| tarbase | hsa-miR-326     | VAMP2      | 6844      | ENSG00000220205 | validated |
| tarbase | hsa-miR-18a-5p  | VAMP2      | 6844      | ENSG00000220205 | validated |
| tarbase | hsa-miR-15b-5p  | PPP3R1     | 5534      | ENSG00000221823 | validated |
| tarbase | hsa-miR-181a-5p | PPP3R1     | 5534      | ENSG00000221823 | validated |
| tarbase | hsa-miR-301a-3p | PPP3R1     | 5534      | ENSG00000221823 | validated |
| tarbase | hsa-miR-106b-5p | FANCG      | 2189      | ENSG00000221829 | validated |
| tarbase | hsa-miR-222-3p  | CEBPD      | 1052      | ENSG00000221869 | validated |
| tarbase | hsa-miR-212-3p  | OR1C1      | 26188     | ENSG00000221888 | validated |
| tarbase | hsa-miR-106b-5p | PPP2R2A    | 5520      | ENSG00000221914 | validated |
| tarbase | hsa-miR-15b-5p  | PPP2R2A    | 5520      | ENSG00000221914 | validated |
| tarbase | hsa-miR-106b-5p | ZNF880     | 400713    | ENSG00000221923 | validated |
| tarbase | hsa-miR-15b-5p  | ZNF880     | 400713    | ENSG00000221923 | validated |
| tarbase | hsa-miR-212-3p  | FXYD7      | 53822     | ENSG00000221946 | validated |
| tarbase | hsa-miR-181a-5p | CCNL2      | 81669     | ENSG00000221978 | validated |
| tarbase | hsa-miR-18a-5p  | CCNL2      | 81669     | ENSG00000221978 | validated |
| tarbase | hsa-miR-192-5p  | UBA52      | 7311      | ENSG00000221983 | validated |
| tarbase | hsa-miR-15b-5p  | PPT2       | 9374      | ENSG00000221988 | validated |
| tarbase | hsa-miR-326     | EXOC3-AS1  |           | ENSG00000221990 | validated |
| tarbase | hsa-miR-212-3p  | EXOC3-AS1  |           | ENSG00000221990 | validated |
| tarbase | hsa-miR-106b-5p | EXOSC6     | 118460    | ENSG00000223496 | validated |
| tarbase | hsa-miR-18a-5p  | EXOSC6     | 118460    | ENSG00000223496 | validated |
| tarbase | hsa-miR-296-5p  | EXOSC6     | 118460    | ENSG00000223496 | validated |
| tarbase | hsa-miR-301a-3p | EXOSC6     | 118460    | ENSG00000223496 | validated |

|         |                 |            |           |                 |           |
|---------|-----------------|------------|-----------|-----------------|-----------|
| tarbase | hsa-miR-212-3p  | ADM5       | 199800    | ENSG00000224420 | validated |
| tarbase | hsa-miR-15b-5p  | ATXN1L     | 342371    | ENSG00000224470 | validated |
| tarbase | hsa-miR-192-5p  | ATXN1L     | 342371    | ENSG00000224470 | validated |
| tarbase | hsa-miR-301a-3p | ATXN1L     | 342371    | ENSG00000224470 | validated |
| tarbase | hsa-miR-106b-5p | ATXN1L     | 342371    | ENSG00000224470 | validated |
| tarbase | hsa-miR-15b-5p  | SMIM13     | 221710    | ENSG00000224531 | validated |
| tarbase | hsa-miR-181a-5p | SMIM13     | 221710    | ENSG00000224531 | validated |
| tarbase | hsa-miR-212-3p  | SMIM13     | 221710    | ENSG00000224531 | validated |
| tarbase | hsa-miR-21-5p   | SMIM13     | 221710    | ENSG00000224531 | validated |
| tarbase | hsa-miR-18a-5p  | SMIM13     | 221710    | ENSG00000224531 | validated |
| tarbase | hsa-miR-181a-5p | ZNF812P    |           | ENSG00000224689 | validated |
| tarbase | hsa-miR-181a-5p | MRPL20-AS1 |           | ENSG00000224870 | validated |
| tarbase | hsa-miR-326     | SLC26A6    | 65010     | ENSG00000225697 | validated |
| tarbase | hsa-miR-582-3p  |            |           | ENSG00000225830 | validated |
| tarbase | hsa-miR-106b-5p | ZNF717     | 100131827 | ENSG00000227124 | validated |
| tarbase | hsa-miR-181a-5p | ZNF717     | 100131827 | ENSG00000227124 | validated |
| tarbase | hsa-miR-301a-3p | KLLN       | 100144748 | ENSG00000227268 | validated |
| tarbase | hsa-miR-18a-5p  | PARG       | 8505      | ENSG00000227345 | validated |
| tarbase | hsa-miR-301a-3p | SCAMP4     | 113178    | ENSG00000227500 | validated |
| tarbase | hsa-miR-212-3p  | TEX46      | 729059    | ENSG00000227868 | validated |
| tarbase | hsa-miR-222-3p  | RPL41      | 6171      | ENSG00000229117 | validated |
| tarbase | hsa-miR-296-5p  | NAMPTP1    |           | ENSG00000229644 | validated |
| tarbase | hsa-miR-326     | PET100     | 100131801 | ENSG00000229833 | validated |
| tarbase | hsa-miR-212-3p  | PPP5D1     | 100506012 | ENSG00000230510 | validated |
| tarbase | hsa-miR-106b-5p | PRB4       | 5545      | ENSG00000230657 | validated |
| tarbase | hsa-miR-21-5p   | HSBP1      | 3281      | ENSG00000230989 | validated |
| tarbase | hsa-miR-18a-5p  | TAPBP      | 6892      | ENSG00000231925 | validated |
| tarbase | hsa-miR-212-3p  | TAPBP      | 6892      | ENSG00000231925 | validated |
| tarbase | hsa-miR-212-3p  | ZBED9      | 114821    | ENSG00000232040 | validated |
| tarbase | hsa-miR-212-3p  | ZNF687-AS1 |           | ENSG00000232671 | validated |
| tarbase | hsa-miR-212-3p  | ZNF879     | 345462    | ENSG00000234284 | validated |
| tarbase | hsa-miR-181a-5p | ZNF736     | 728927    | ENSG00000234444 | validated |
| tarbase | hsa-miR-582-5p  | ZNF736     | 728927    | ENSG00000234444 | validated |
| tarbase | hsa-miR-106b-5p | ZNF736     | 728927    | ENSG00000234444 | validated |
| tarbase | hsa-miR-181a-5p | JRK        | 8629      | ENSG00000234616 | validated |
| tarbase | hsa-miR-212-3p  | HLA-B      | 3106      | ENSG00000234745 | validated |
| tarbase | hsa-miR-212-3p  | RNF148     | 378925    | ENSG00000235631 | validated |
| tarbase | hsa-miR-192-5p  | ZBTB22     | 9278      | ENSG00000236104 | validated |
| tarbase | hsa-miR-15b-5p  | ZBED5      | 58486     | ENSG00000236287 | validated |
| tarbase | hsa-miR-181a-5p | ZBED5      | 58486     | ENSG00000236287 | validated |
| tarbase | hsa-miR-301a-3p | ZNF853     | 54753     | ENSG00000236609 | validated |
| tarbase | hsa-miR-212-3p  | IFNA4      | 3441      | ENSG00000236637 | validated |
| tarbase | hsa-miR-15b-5p  | TMEM250    | 90120     | ENSG00000238227 | validated |
| tarbase | hsa-miR-18a-5p  | TMEM250    | 90120     | ENSG00000238227 | validated |
| tarbase | hsa-miR-296-5p  | TMEM250    | 90120     | ENSG00000238227 | validated |
| tarbase | hsa-miR-301a-3p | TMEM250    | 90120     | ENSG00000238227 | validated |
| tarbase | hsa-miR-106b-5p | RNF103     | 7844      | ENSG00000239305 | validated |
| tarbase | hsa-miR-181a-5p | RNF103     | 7844      | ENSG00000239305 | validated |
| tarbase | hsa-miR-18a-5p  | RNF103     | 7844      | ENSG00000239305 | validated |
| tarbase | hsa-miR-192-5p  | RNF103     | 7844      | ENSG00000239305 | validated |
| tarbase | hsa-miR-15b-5p  | RBM14      | 10432     | ENSG00000239306 | validated |
| tarbase | hsa-miR-18a-5p  | RBM14      | 10432     | ENSG00000239306 | validated |
| tarbase | hsa-miR-296-5p  | RBM14      | 10432     | ENSG00000239306 | validated |
| tarbase | hsa-miR-505-3p  | RBM14      | 10432     | ENSG00000239306 | validated |
| tarbase | hsa-miR-301a-3p | WBP1       | 23559     | ENSG00000239779 | validated |
| tarbase | hsa-miR-15b-5p  | GET4       | 51608     | ENSG00000239857 | validated |
| tarbase | hsa-miR-212-3p  | C1orf226   | 400793    | ENSG00000239887 | validated |
| tarbase | hsa-miR-212-3p  | LILRA4     | 23547     | ENSG00000239961 | validated |
| tarbase | hsa-miR-15b-5p  | LY6G5B     | 58496     | ENSG00000240053 | validated |
| tarbase | hsa-miR-181a-5p | LCE1F      | 353137    | ENSG00000240386 | validated |
| tarbase | hsa-miR-181a-5p | PNMA2      | 10687     | ENSG00000240694 | validated |
| tarbase | hsa-miR-15b-5p  | PCDHGC5    | 56097     | ENSG00000240764 | validated |
| tarbase | hsa-miR-181a-5p | MIF        | 4282      | ENSG00000240972 | validated |
| tarbase | hsa-miR-21-5p   | YAE1       | 57002     | ENSG00000241127 | validated |
| tarbase | hsa-miR-505-3p  | RPL36A     | 6173      | ENSG00000241343 | validated |
| tarbase | hsa-miR-106b-5p | SSX2       | 6757      | ENSG00000241476 | validated |
| tarbase | hsa-miR-192-5p  | ARPC4      | 10093     | ENSG00000241553 | validated |
| tarbase | hsa-miR-296-5p  | ARPC4      | 10093     | ENSG00000241553 | validated |
| tarbase | hsa-miR-301a-3p | ARPC4      | 10093     | ENSG00000241553 | validated |
| tarbase | hsa-miR-106b-5p | ARPC4      | 10093     | ENSG00000241553 | validated |
| tarbase | hsa-miR-301a-3p | ARPC1A     | 10552     | ENSG00000241685 | validated |

|         |                 |              |           |                 |           |
|---------|-----------------|--------------|-----------|-----------------|-----------|
| tarbase | hsa-miR-21-5p   | ATP5PO       | 539       | ENSG00000241837 | validated |
| tarbase | hsa-miR-192-5p  | PISD         | 23761     | ENSG00000241878 | validated |
| tarbase | hsa-miR-326     | PISD         | 23761     | ENSG00000241878 | validated |
| tarbase | hsa-miR-212-3p  | HOGA1        | 112817    | ENSG00000241935 | validated |
| tarbase | hsa-miR-15b-5p  | PI4KA        | 5297      | ENSG00000241973 | validated |
| tarbase | hsa-miR-21-5p   | PI4KA        | 5297      | ENSG00000241973 | validated |
| tarbase | hsa-miR-15b-5p  | ARFGAP3      | 26286     | ENSG00000242247 | validated |
| tarbase | hsa-miR-326     | ARFGAP3      | 26286     | ENSG00000242247 | validated |
| tarbase | hsa-miR-144-3p  | PEG10        | 23089     | ENSG00000242265 | validated |
| tarbase | hsa-miR-181a-5p | PEG10        | 23089     | ENSG00000242265 | validated |
| tarbase | hsa-miR-18a-5p  | PEG10        | 23089     | ENSG00000242265 | validated |
| tarbase | hsa-miR-212-3p  | PEG10        | 23089     | ENSG00000242265 | validated |
| tarbase | hsa-miR-582-3p  | PEG10        | 23089     | ENSG00000242265 | validated |
| tarbase | hsa-miR-15b-5p  | PEG10        | 23089     | ENSG00000242265 | validated |
| tarbase | hsa-miR-18a-5p  | EIF6         | 3692      | ENSG00000242372 | validated |
| tarbase | hsa-miR-296-5p  | PCDHGC4      | 56098     | ENSG00000242419 | validated |
| tarbase | hsa-miR-15b-5p  | MRPL20       | 55052     | ENSG00000242485 | validated |
| tarbase | hsa-miR-15b-5p  | GNG10        | 2790      | ENSG00000242616 | validated |
| tarbase | hsa-miR-212-3p  | PSMB9        | 5698      | ENSG00000242711 | validated |
| tarbase | hsa-miR-18a-5p  | PSG4         | 5672      | ENSG00000243137 | validated |
| tarbase | hsa-miR-181a-5p | MICAL3       | 57553     | ENSG00000243156 | validated |
| tarbase | hsa-miR-296-5p  | PPAN-P2RY11  | 692312    | ENSG00000243207 | validated |
| tarbase | hsa-miR-106b-5p | STON1        | 11037     | ENSG00000243244 | validated |
| tarbase | hsa-miR-212-3p  | STON1        | 11037     | ENSG00000243244 | validated |
| tarbase | hsa-miR-181a-5p | STMP1        | 647087    | ENSG00000243317 | validated |
| tarbase | hsa-miR-582-5p  | KCTD7        | 154881    | ENSG00000243335 | validated |
| tarbase | hsa-miR-15b-5p  | C4orf48      | 401115    | ENSG00000243449 | validated |
| tarbase | hsa-miR-181a-5p | TNFRSF6B     | 8771      | ENSG00000243509 | validated |
| tarbase | hsa-miR-18a-5p  | UPK3B        | 105375355 | ENSG00000243566 | validated |
| tarbase | hsa-miR-15b-5p  | DDOST        | 1650      | ENSG00000244038 | validated |
| tarbase | hsa-miR-15b-5p  | TMEM199      | 147007    | ENSG00000244045 | validated |
| tarbase | hsa-miR-181a-5p | TMEM199      | 147007    | ENSG00000244045 | validated |
| tarbase | hsa-miR-15b-5p  | DBNDD2       | 55861     | ENSG00000244274 | validated |
| tarbase | hsa-miR-106b-5p | RBM12        | 10137     | ENSG00000244462 | validated |
| tarbase | hsa-miR-144-3p  | RBM12        | 10137     | ENSG00000244462 | validated |
| tarbase | hsa-miR-15b-5p  | RBM12        | 10137     | ENSG00000244462 | validated |
| tarbase | hsa-miR-192-5p  | RBM12        | 10137     | ENSG00000244462 | validated |
| tarbase | hsa-miR-301a-3p | RBM12        | 10137     | ENSG00000244462 | validated |
| tarbase | hsa-miR-21-5p   | RBM12        | 10137     | ENSG00000244462 | validated |
| tarbase | hsa-miR-15b-5p  | SCARF2       | 91179     | ENSG00000244486 | validated |
| tarbase | hsa-miR-181a-5p | N4BP2L2      | 10443     | ENSG00000244754 | validated |
| tarbase | hsa-miR-212-3p  | AC008393.1   |           | ENSG00000245317 | validated |
| tarbase | hsa-miR-181a-5p | H2AJ         | 55766     | ENSG00000246705 | validated |
| tarbase | hsa-miR-106b-5p | PGAM5        | 192111    | ENSG00000247077 | validated |
| tarbase | hsa-miR-296-5p  | PGAM5        | 192111    | ENSG00000247077 | validated |
| tarbase | hsa-miR-181a-5p | ZCCHC3       | 85364     | ENSG00000247315 | validated |
| tarbase | hsa-miR-18a-5p  | ZCCHC3       | 85364     | ENSG00000247315 | validated |
| tarbase | hsa-miR-212-3p  | ZCCHC3       | 85364     | ENSG00000247315 | validated |
| tarbase | hsa-miR-301a-3p | MARS2        | 92935     | ENSG00000247626 | validated |
| tarbase | hsa-miR-106b-5p | ADH1C        | 126       | ENSG00000248144 | validated |
| tarbase | hsa-miR-212-3p  | C4orf54      | 285556    | ENSG00000248713 | validated |
| tarbase | hsa-miR-21-5p   | AC004997.1   |           | ENSG00000248751 | validated |
| tarbase | hsa-miR-181a-5p | ZNF564       | 163050    | ENSG00000249709 | validated |
| tarbase | hsa-miR-18a-5p  | ZNF564       | 163050    | ENSG00000249709 | validated |
| tarbase | hsa-miR-181a-5p | PDCD6        | 10016     | ENSG00000249915 | validated |
| tarbase | hsa-miR-21-5p   | PDCD6        | 10016     | ENSG00000249915 | validated |
| tarbase | hsa-miR-582-5p  | PDCD6        | 10016     | ENSG00000249915 | validated |
| tarbase | hsa-miR-301a-3p | AC093791.1   |           | ENSG00000250038 | validated |
| tarbase | hsa-miR-582-5p  | ZNF718       | 255403    | ENSG00000250312 | validated |
| tarbase | hsa-miR-296-5p  | CHCHD10      | 400916    | ENSG00000250479 | validated |
| tarbase | hsa-miR-192-5p  | GLI4         | 2738      | ENSG00000250571 | validated |
| tarbase | hsa-miR-106b-5p | TMED7-TICAM2 | 100302736 | ENSG00000251201 | validated |
| tarbase | hsa-miR-222-3p  | TMED7-TICAM2 | 100302736 | ENSG00000251201 | validated |
| tarbase | hsa-miR-301a-3p | TMED7-TICAM2 | 100302736 | ENSG00000251201 | validated |
| tarbase | hsa-miR-181a-5p | AP000350.4   |           | ENSG00000251357 | validated |
| tarbase | hsa-miR-106b-5p | FOXD1        | 2297      | ENSG00000251493 | validated |
| tarbase | hsa-miR-106b-5p | PRB1         | 5542      | ENSG00000251655 | validated |
| tarbase | hsa-miR-582-5p  | C8orf88      | 100127983 | ENSG00000253250 | validated |
| tarbase | hsa-miR-106b-5p | SHLD3        | 112441434 | ENSG00000253251 | validated |
| tarbase | hsa-miR-181a-5p | HOXA10       | 3206      | ENSG00000253293 | validated |
| tarbase | hsa-miR-21-5p   | ALG11        | 440138    | ENSG00000253710 | validated |



|         |                 |                 |           |                 |           |
|---------|-----------------|-----------------|-----------|-----------------|-----------|
| tarbase | hsa-miR-212-3p  | ATXN7L3B        | 552889    | ENSG00000253719 | validated |
| tarbase | hsa-miR-21-5p   | ATXN7L3B        | 552889    | ENSG00000253719 | validated |
| tarbase | hsa-miR-106b-5p | PRKDC           | 5591      | ENSG00000253729 | validated |
| tarbase | hsa-miR-15b-5p  | PRKDC           | 5591      | ENSG00000253729 | validated |
| tarbase | hsa-miR-181a-5p | PRKDC           | 5591      | ENSG00000253729 | validated |
| tarbase | hsa-miR-18a-5p  | PRKDC           | 5591      | ENSG00000253729 | validated |
| tarbase | hsa-miR-212-3p  | PRKDC           | 5591      | ENSG00000253729 | validated |
| tarbase | hsa-miR-21-5p   | PRKDC           | 5591      | ENSG00000253729 | validated |
| tarbase | hsa-miR-106b-5p | UTP14C          | 9724      | ENSG00000253797 | validated |
| tarbase | hsa-miR-15b-5p  | UTP14C          | 9724      | ENSG00000253797 | validated |
| tarbase | hsa-miR-18a-5p  | PCDHGB2         | 56103     | ENSG00000253910 | validated |
| tarbase | hsa-miR-181a-5p | ZNF260          | 339324    | ENSG00000254004 | validated |
| tarbase | hsa-miR-106b-5p | LYN             | 4067      | ENSG00000254087 | validated |
| tarbase | hsa-miR-18a-5p  | LYN             | 4067      | ENSG00000254087 | validated |
| tarbase | hsa-miR-106b-5p | PABPC4L         | 132430    | ENSG00000254535 | validated |
| tarbase | hsa-miR-326     | PABPC4L         | 132430    | ENSG00000254535 | validated |
| tarbase | hsa-miR-212-3p  | FPGT            | 8790      | ENSG00000254685 | validated |
| tarbase | hsa-miR-15b-5p  | AL136295.1      |           | ENSG00000254692 | validated |
| tarbase | hsa-miR-212-3p  | MEX3A           | 92312     | ENSG00000254726 | validated |
| tarbase | hsa-miR-222-3p  | MEX3A           | 92312     | ENSG00000254726 | validated |
| tarbase | hsa-miR-181a-5p | MEX3A           | 92312     | ENSG00000254726 | validated |
| tarbase | hsa-miR-106b-5p | EEF1G           | 1937      | ENSG00000254772 | validated |
| tarbase | hsa-miR-301a-3p | EEF1G           | 1937      | ENSG00000254772 | validated |
| tarbase | hsa-miR-15b-5p  | CKLF-CMTM1      | 100529251 | ENSG00000254788 | validated |
| tarbase | hsa-miR-15b-5p  | ANKHD1-EIF4EBP3 | 404734    | ENSG00000254996 | validated |
| tarbase | hsa-miR-192-5p  | ANKHD1-EIF4EBP3 | 404734    | ENSG00000254996 | validated |
| tarbase | hsa-miR-212-3p  | ANKHD1-EIF4EBP3 | 404734    | ENSG00000254996 | validated |
| tarbase | hsa-miR-301a-3p | ANKHD1-EIF4EBP3 | 404734    | ENSG00000254996 | validated |
| tarbase | hsa-miR-212-3p  | KRTAP5-9        | 3846      | ENSG00000254997 | validated |
| tarbase | hsa-miR-222-3p  | BRK1            | 55845     | ENSG00000254999 | validated |
| tarbase | hsa-miR-18a-5p  | AP001318.2      |           | ENSG00000255062 | validated |
| tarbase | hsa-miR-106b-5p | ZFP91-CNTF      |           | ENSG00000255073 | validated |
| tarbase | hsa-miR-301a-3p | ZFP91-CNTF      |           | ENSG00000255073 | validated |
| tarbase | hsa-miR-15b-5p  | EID1            | 23741     | ENSG00000255302 | validated |
| tarbase | hsa-miR-212-3p  | AL096711.2      |           | ENSG00000255330 | validated |
| tarbase | hsa-miR-181a-5p | AL096711.2      |           | ENSG00000255330 | validated |
| tarbase | hsa-miR-181a-5p | POLR2M          | 81488     | ENSG00000255529 | validated |
| tarbase | hsa-miR-582-3p  | MTRNR2L9        |           | ENSG00000255633 | validated |
| tarbase | hsa-miR-212-3p  | TRIL            | 9865      | ENSG00000255690 | validated |
| tarbase | hsa-miR-582-3p  | MTRNR2L8        | 100463486 | ENSG00000255823 | validated |
| tarbase | hsa-miR-106b-5p | COA8            | 84334     | ENSG00000256053 | validated |
| tarbase | hsa-miR-181a-5p | ZNF432          | 9668      | ENSG00000256087 | validated |
| tarbase | hsa-miR-15b-5p  | AP000721.1      |           | ENSG00000256100 | validated |
| tarbase | hsa-miR-181a-5p | ZNF10           | 7556      | ENSG00000256223 | validated |
| tarbase | hsa-miR-21-5p   | ZNF10           | 7556      | ENSG00000256223 | validated |
| tarbase | hsa-miR-181a-5p | HMBS            | 3145      | ENSG00000256269 | validated |
| tarbase | hsa-miR-212-3p  | AC021092.2      | 7768      | ENSG00000256294 | validated |
| tarbase | hsa-miR-21-5p   | SALL3           | 27164     | ENSG00000256463 | validated |
| tarbase | hsa-miR-582-3p  | MTRNR2L1        | 100462977 | ENSG00000256618 | validated |
| tarbase | hsa-miR-18a-5p  | ZNF253          | 56242     | ENSG00000256771 | validated |
| tarbase | hsa-miR-582-5p  | LSM14A          | 26065     | ENSG00000257103 | validated |
| tarbase | hsa-miR-15b-5p  | GATC            | 283459    | ENSG00000257218 | validated |
| tarbase | hsa-miR-181a-5p | GATC            | 283459    | ENSG00000257218 | validated |
| tarbase | hsa-miR-301a-3p | GATC            | 283459    | ENSG00000257218 | validated |
| tarbase | hsa-miR-212-3p  | LINC01619       |           | ENSG00000257242 | validated |
| tarbase | hsa-miR-181a-5p | ZBED6           | 100381270 | ENSG00000257315 | validated |
| tarbase | hsa-miR-212-3p  | ZBED6           | 100381270 | ENSG00000257315 | validated |
| tarbase | hsa-miR-212-3p  | MGAM            | 8972      | ENSG00000257335 | validated |
| tarbase | hsa-miR-181a-5p | ZNF625          | 90589     | ENSG00000257591 | validated |
| tarbase | hsa-miR-15b-5p  | CUX1            | 1523      | ENSG00000257923 | validated |
| tarbase | hsa-miR-21-5p   | CUX1            | 1523      | ENSG00000257923 | validated |
| tarbase | hsa-miR-301a-3p | CUX1            | 1523      | ENSG00000257923 | validated |
| tarbase | hsa-miR-582-3p  | CUX1            | 1523      | ENSG00000257923 | validated |
| tarbase | hsa-miR-181a-5p | CHURC1          | 91612     | ENSG00000258289 | validated |
| tarbase | hsa-miR-21-5p   | AC009779.4      |           | ENSG00000258311 | validated |
| tarbase | hsa-miR-212-3p  | C17orf49        | 124944    | ENSG00000258315 | validated |
| tarbase | hsa-miR-181a-5p | RTEL1           | 51750     | ENSG00000258366 | validated |
| tarbase | hsa-miR-582-3p  | AC011448.1      |           | ENSG00000258674 | validated |
| tarbase | hsa-miR-21-5p   | CEP95           | 90799     | ENSG00000258890 | validated |
| tarbase | hsa-miR-106b-5p | BLOC1S5-TXNDC5  |           | ENSG00000259040 | validated |
| tarbase | hsa-miR-181a-5p | BLOC1S5-TXNDC5  |           | ENSG00000259040 | validated |

|         |                 |                |           |                 |           |
|---------|-----------------|----------------|-----------|-----------------|-----------|
| tarbase | hsa-miR-505-3p  | BLOC1S5-TXNDC5 |           | ENSG00000259040 | validated |
| tarbase | hsa-miR-106b-5p | POC1B-GALNT4   | 100528030 | ENSG00000259075 | validated |
| tarbase | hsa-miR-181a-5p | POC1B-GALNT4   | 100528030 | ENSG00000259075 | validated |
| tarbase | hsa-miR-15b-5p  | THTPA          | 79178     | ENSG00000259431 | validated |
| tarbase | hsa-miR-106b-5p | RBM15B         | 29890     | ENSG00000259956 | validated |
| tarbase | hsa-miR-222-3p  | HOXB7          | 3217      | ENSG00000260027 | validated |
| tarbase | hsa-miR-18a-5p  | FRRS1L         | 23732     | ENSG00000260230 | validated |
| tarbase | hsa-miR-296-5p  | AC093525.2     |           | ENSG00000260272 | validated |
| tarbase | hsa-miR-212-3p  | MRC1           | 4360      | ENSG00000260314 | validated |
| tarbase | hsa-miR-15b-5p  | AL035425.3     | 8471      | ENSG00000260548 | validated |
| tarbase | hsa-miR-181a-5p | AL035425.3     | 8471      | ENSG00000260548 | validated |
| tarbase | hsa-miR-106b-5p | CCPG1          | 9236      | ENSG00000260916 | validated |
| tarbase | hsa-miR-15b-5p  | TMEM178B       | 100507421 | ENSG00000261115 | validated |
| tarbase | hsa-miR-212-3p  | EPPK1          | 83481     | ENSG00000261150 | validated |
| tarbase | hsa-miR-106b-5p | GAN            | 8139      | ENSG00000261609 | validated |
| tarbase | hsa-miR-144-3p  | GAN            | 8139      | ENSG00000261609 | validated |
| tarbase | hsa-miR-15b-5p  | GAN            | 8139      | ENSG00000261609 | validated |
| tarbase | hsa-miR-181a-5p | GAN            | 8139      | ENSG00000261609 | validated |
| tarbase | hsa-miR-18a-5p  | GAN            | 8139      | ENSG00000261609 | validated |
| tarbase | hsa-miR-21-5p   | GAN            | 8139      | ENSG00000261609 | validated |
| tarbase | hsa-miR-301a-3p | GAN            | 8139      | ENSG00000261609 | validated |
| tarbase | hsa-miR-212-3p  | C15orf65       | 145788    | ENSG00000261652 | validated |
| tarbase | hsa-miR-326     | LY6L           | 101928108 | ENSG00000261667 | validated |
| tarbase | hsa-miR-212-3p  | TCF24          | 100129654 | ENSG00000261787 | validated |
| tarbase | hsa-miR-212-3p  | MMP12          | 4321      | ENSG00000262406 | validated |
| tarbase | hsa-miR-144-3p  | GTF2I          | 2969      | ENSG00000263001 | validated |
| tarbase | hsa-miR-106b-5p | NOTCH2NLA      | 388677    | ENSG00000264343 | validated |
| tarbase | hsa-miR-144-3p  | DYNLL2         | 140735    | ENSG00000264364 | validated |
| tarbase | hsa-miR-192-5p  | DYNLL2         | 140735    | ENSG00000264364 | validated |
| tarbase | hsa-miR-301a-3p | DYNLL2         | 140735    | ENSG00000264364 | validated |
| tarbase | hsa-miR-15b-5p  | OTUD7B         | 56957     | ENSG00000264522 | validated |
| tarbase | hsa-miR-301a-3p | AC138696.1     |           | ENSG00000264668 | validated |
| tarbase | hsa-miR-106b-5p | RBM8A          | 9939      | ENSG00000265241 | validated |
| tarbase | hsa-miR-181a-5p | RBM8A          | 9939      | ENSG00000265241 | validated |
| tarbase | hsa-miR-301a-3p | TIMM23         | 100287932 | ENSG00000265354 | validated |
| tarbase | hsa-miR-181a-5p | RNF115         | 27246     | ENSG00000265491 | validated |
| tarbase | hsa-miR-18a-5p  | RPL17          | 6139      | ENSG00000265681 | validated |
| tarbase | hsa-miR-144-3p  | TXNIP          | 10628     | ENSG00000265972 | validated |
| tarbase | hsa-miR-181a-5p | TXNIP          | 10628     | ENSG00000265972 | validated |
| tarbase | hsa-miR-192-5p  | TXNIP          | 10628     | ENSG00000265972 | validated |
| tarbase | hsa-miR-21-5p   | TXNIP          | 10628     | ENSG00000265972 | validated |
| tarbase | hsa-miR-301a-3p | BAHCC1         | 57597     | ENSG00000266074 | validated |
| tarbase | hsa-miR-106b-5p | RASSF5         | 83593     | ENSG00000266094 | validated |
| tarbase | hsa-miR-21-5p   | NCOA4          | 8031      | ENSG00000266412 | validated |
| tarbase | hsa-miR-106b-5p | ZNF850         | 342892    | ENSG00000267041 | validated |
| tarbase | hsa-miR-181a-5p | ZNF850         | 342892    | ENSG00000267041 | validated |
| tarbase | hsa-miR-212-3p  | ZNF850         | 342892    | ENSG00000267041 | validated |
| tarbase | hsa-miR-181a-5p | FDX2           | 112812    | ENSG00000267673 | validated |
| tarbase | hsa-miR-106b-5p | ZNF224         | 7767      | ENSG00000267680 | validated |
| tarbase | hsa-miR-15b-5p  | ZNF224         | 7767      | ENSG00000267680 | validated |
| tarbase | hsa-miR-18a-5p  | AC024592.3     |           | ENSG00000267740 | validated |
| tarbase | hsa-miR-301a-3p | NDUFA7         | 4701      | ENSG00000267855 | validated |
| tarbase | hsa-miR-21-5p   | SLC6A14        | 11254     | ENSG00000268104 | validated |
| tarbase | hsa-miR-18a-5p  | MTRNR2L12      | 100462981 | ENSG00000269028 | validated |
| tarbase | hsa-miR-18a-5p  | ZNF728         | 388523    | ENSG00000269067 | validated |
| tarbase | hsa-miR-18a-5p  | ZNF587B        | 100293516 | ENSG00000269343 | validated |
| tarbase | hsa-miR-192-5p  | ZNF587B        | 100293516 | ENSG00000269343 | validated |
| tarbase | hsa-miR-192-5p  | SPIB           | 6689      | ENSG00000269404 | validated |
| tarbase | hsa-miR-15b-5p  | TMEM185A       | 84548     | ENSG00000269556 | validated |
| tarbase | hsa-miR-192-5p  | H4C15          | 554313    | ENSG00000270276 | validated |
| tarbase | hsa-miR-192-5p  | AL121758.1     |           | ENSG00000270299 | validated |
| tarbase | hsa-miR-192-5p  | H4C14          | 8370      | ENSG00000270882 | validated |
| tarbase | hsa-miR-181a-5p | RASL10B        | 91608     | ENSG00000270885 | validated |
| tarbase | hsa-miR-212-3p  | CCL5           | 6352      | ENSG00000271503 | validated |
| tarbase | hsa-miR-582-3p  | LIX1L          | 128077    | ENSG00000271601 | validated |
| tarbase | hsa-miR-212-3p  | ANKRD34A       | 284615    | ENSG00000272031 | validated |
| tarbase | hsa-miR-15b-5p  | KMT2B          | 9757      | ENSG00000272333 | validated |
| tarbase | hsa-miR-296-5p  | KMT2B          | 9757      | ENSG00000272333 | validated |
| tarbase | hsa-miR-21-5p   | ZNF595         | 152687    | ENSG00000272602 | validated |
| tarbase | hsa-miR-212-3p  | ZNF595         | 152687    | ENSG00000272602 | validated |
| tarbase | hsa-miR-15b-5p  | DCP1A          | 55802     | ENSG00000272886 | validated |

|         |                 |               |        |                 |           |
|---------|-----------------|---------------|--------|-----------------|-----------|
| tarbase | hsa-miR-181a-5p | DCP1A         | 55802  | ENSG00000272886 | validated |
| tarbase | hsa-miR-21-5p   | Z94721.2      |        | ENSG00000272980 | validated |
| tarbase | hsa-miR-212-3p  | C2orf15       | 150590 | ENSG00000273045 | validated |
| tarbase | hsa-miR-15b-5p  | GRIN2B        | 2904   | ENSG00000273079 | validated |
| tarbase | hsa-miR-181a-5p | GRIN2B        | 2904   | ENSG00000273079 | validated |
| tarbase | hsa-miR-192-5p  | C1QTNF3-AMACR |        | ENSG00000273294 | validated |
| tarbase | hsa-miR-15b-5p  | ZNHIT3        | 9326   | ENSG00000273611 | validated |
| tarbase | hsa-miR-582-3p  | CYFIP1        | 23191  | ENSG00000273749 | validated |
| tarbase | hsa-miR-15b-5p  | H2BC8         | 8339   | ENSG00000273802 | validated |
| tarbase | hsa-miR-181a-5p | TAF9          | 6880   | ENSG00000273841 | validated |
| tarbase | hsa-miR-192-5p  | NOL12         | 79159  | ENSG00000273899 | validated |
| tarbase | hsa-miR-15b-5p  | NATD1         | 256302 | ENSG00000274180 | validated |
| tarbase | hsa-miR-144-3p  | SOCS7         | 30837  | ENSG00000274211 | validated |
| tarbase | hsa-miR-582-5p  | SOCS7         | 30837  | ENSG00000274211 | validated |
| tarbase | hsa-miR-212-3p  | ZNF658        | 26149  | ENSG00000274349 | validated |
| tarbase | hsa-miR-212-3p  | H2BC17        | 8348   | ENSG00000274641 | validated |
| tarbase | hsa-miR-212-3p  | H3C6          | 8353   | ENSG00000274750 | validated |
| tarbase | hsa-miR-192-5p  | NPHP3-ACAD11  |        | ENSG00000274810 | validated |
| tarbase | hsa-miR-15b-5p  | H2AC12        | 85235  | ENSG00000274997 | validated |
| tarbase | hsa-miR-181a-5p | H2AC12        | 85235  | ENSG00000274997 | validated |
| tarbase | hsa-miR-18a-5p  | ZNF280B       | 140883 | ENSG00000275004 | validated |
| tarbase | hsa-miR-192-5p  | MLLT6         | 4302   | ENSG00000275023 | validated |
| tarbase | hsa-miR-212-3p  | MLLT6         | 4302   | ENSG00000275023 | validated |
| tarbase | hsa-miR-296-5p  | MLLT6         | 4302   | ENSG00000275023 | validated |
| tarbase | hsa-miR-301a-3p | MLLT6         | 4302   | ENSG00000275023 | validated |
| tarbase | hsa-miR-15b-5p  | PPP4R3B       | 57223  | ENSG00000275052 | validated |
| tarbase | hsa-miR-181a-5p | SYNRG         | 11276  | ENSG00000275066 | validated |
| tarbase | hsa-miR-301a-3p | SYNRG         | 11276  | ENSG00000275066 | validated |
| tarbase | hsa-miR-212-3p  | ZNF2          | 7549   | ENSG00000275111 | validated |
| tarbase | hsa-miR-106b-5p | ZNF2          | 7549   | ENSG00000275111 | validated |
| tarbase | hsa-miR-212-3p  | CCL4          | 6351   | ENSG00000275302 | validated |
| tarbase | hsa-miR-106b-5p | PRAG1         | 157285 | ENSG00000275342 | validated |
| tarbase | hsa-miR-296-5p  | PRAG1         | 157285 | ENSG00000275342 | validated |
| tarbase | hsa-miR-212-3p  | H3C11         | 8354   | ENSG00000275379 | validated |
| tarbase | hsa-miR-212-3p  | H2BC9         | 8345   | ENSG00000275713 | validated |
| tarbase | hsa-miR-326     | H3C1          | 8350   | ENSG00000275714 | validated |
| tarbase | hsa-miR-192-5p  | DUSP14        | 11072  | ENSG00000276023 | validated |
| tarbase | hsa-miR-181a-5p | ORAI1         | 84876  | ENSG00000276045 | validated |
| tarbase | hsa-miR-296-5p  | ORAI1         | 84876  | ENSG00000276045 | validated |
| tarbase | hsa-miR-296-5p  | H4C9          | 8294   | ENSG00000276180 | validated |
| tarbase | hsa-miR-21-5p   | TADA2A        | 6871   | ENSG00000276234 | validated |
| tarbase | hsa-miR-181a-5p | PIP4K2B       | 8396   | ENSG00000276293 | validated |
| tarbase | hsa-miR-212-3p  | PIP4K2B       | 8396   | ENSG00000276293 | validated |
| tarbase | hsa-miR-15b-5p  | H2AC14        | 8331   | ENSG00000276368 | validated |
| tarbase | hsa-miR-212-3p  | DACH1         | 1602   | ENSG00000276644 | validated |
| tarbase | hsa-miR-301a-3p | H4C5          | 8367   | ENSG00000276966 | validated |
| tarbase | hsa-miR-21-5p   | H2AC8         | 3012   | ENSG00000277075 | validated |
| tarbase | hsa-miR-106b-5p | PCGF2         | 7703   | ENSG00000277258 | validated |
| tarbase | hsa-miR-181a-5p | PCGF2         | 7703   | ENSG00000277258 | validated |
| tarbase | hsa-miR-301a-3p | SRCIN1        | 80725  | ENSG00000277363 | validated |
| tarbase | hsa-miR-212-3p  | MARCKS        | 4082   | ENSG00000277443 | validated |
| tarbase | hsa-miR-212-3p  | ZNF670        | 93474  | ENSG00000277462 | validated |
| tarbase | hsa-miR-582-3p  | CCL3          | 6348   | ENSG00000277632 | validated |
| tarbase | hsa-miR-15b-5p  | ZNF8          | 7554   | ENSG00000278129 | validated |
| tarbase | hsa-miR-18a-5p  | ZNF8          | 7554   | ENSG00000278129 | validated |
| tarbase | hsa-miR-106b-5p | MYO19         | 80179  | ENSG00000278259 | validated |
| tarbase | hsa-miR-15b-5p  | MYO19         | 80179  | ENSG00000278259 | validated |
| tarbase | hsa-miR-106b-5p | GGNBP2        | 79893  | ENSG00000278311 | validated |
| tarbase | hsa-miR-181a-5p | GGNBP2        | 79893  | ENSG00000278311 | validated |
| tarbase | hsa-miR-181a-5p | ZNF229        | 7772   | ENSG00000278318 | validated |
| tarbase | hsa-miR-15b-5p  | H2AC4         | 8335   | ENSG00000278463 | validated |
| tarbase | hsa-miR-15b-5p  | ACACA         | 31     | ENSG00000278540 | validated |
| tarbase | hsa-miR-192-5p  | H4C2          | 8366   | ENSG00000278705 | validated |
| tarbase | hsa-miR-21-5p   | HIF-1???      |        |                 | validated |
| tarbase | hsa-miR-21-5p   | HNRPH1        |        |                 | validated |
| tarbase | hsa-miR-192-5p  | HSS00009331   |        |                 | validated |
| tarbase | hsa-miR-192-5p  | HSS00018228   |        |                 | validated |
| tarbase | hsa-miR-192-5p  | HSS00060369   |        |                 | validated |
| tarbase | hsa-miR-192-5p  | HSS00061034   |        |                 | validated |
| tarbase | hsa-miR-192-5p  | HSS00062828   |        |                 | validated |
| tarbase | hsa-miR-192-5p  | HSS00075325   |        |                 | validated |

|         |                 |                 |        |                 |           |
|---------|-----------------|-----------------|--------|-----------------|-----------|
| tarbase | hsa-miR-192-5p  | HSS00087671     |        |                 | validated |
| tarbase | hsa-miR-192-5p  | HSS00090480     |        |                 | validated |
| tarbase | hsa-miR-192-5p  | HSS00102527     |        |                 | validated |
| tarbase | hsa-miR-192-5p  | HSS00104143     |        |                 | validated |
| tarbase | hsa-miR-192-5p  | HSS00138557     |        |                 | validated |
| tarbase | hsa-miR-192-5p  | HSS00142930     |        |                 | validated |
| tarbase | hsa-miR-192-5p  | HSS00209806     |        |                 | validated |
| tarbase | hsa-miR-192-5p  | HSS00250837     |        |                 | validated |
| tarbase | hsa-miR-192-5p  | HSS00264804     |        |                 | validated |
| tarbase | hsa-miR-192-5p  | HSS00300718     |        |                 | validated |
| tarbase | hsa-miR-192-5p  | HSS00303498     |        |                 | validated |
| tarbase | hsa-miR-192-5p  | HSS00303609     |        |                 | validated |
| tarbase | hsa-miR-192-5p  | HSS00305022     |        |                 | validated |
| tarbase | hsa-miR-192-5p  | HSS00309444     |        |                 | validated |
| tarbase | hsa-miR-192-5p  | HSS00321855     |        |                 | validated |
| tarbase | hsa-miR-192-5p  | HSS00330832     |        |                 | validated |
| tarbase | hsa-miR-192-5p  | HSS00368570     |        |                 | validated |
| tarbase | hsa-miR-192-5p  | HSS00386249     |        |                 | validated |
| tarbase | hsa-miR-192-5p  | HSS00388495     |        |                 | validated |
| tarbase | hsa-miR-21-5p   | MMP-2           |        |                 | validated |
| tarbase | hsa-miR-192-5p  | NM_006333       |        |                 | validated |
| tarbase | hsa-miR-192-5p  | NM_015393       |        |                 | validated |
| tarbase | hsa-miR-192-5p  | NM_015595       |        |                 | validated |
| tarbase | hsa-miR-192-5p  | NM_016125       |        |                 | validated |
| tarbase | hsa-miR-192-5p  | NM_017842       |        |                 | validated |
| tarbase | hsa-miR-192-5p  | NM_018059       |        |                 | validated |
| tarbase | hsa-miR-192-5p  | NM_018071       |        |                 | validated |
| tarbase | hsa-miR-192-5p  | NM_018590       |        |                 | validated |
| tarbase | hsa-miR-192-5p  | NM_020467       |        |                 | validated |
| tarbase | hsa-miR-192-5p  | NM_020962       |        |                 | validated |
| tarbase | hsa-miR-192-5p  | NM_024084       |        |                 | validated |
| tarbase | hsa-miR-192-5p  | NM_030941       |        |                 | validated |
| tarbase | hsa-miR-192-5p  | NM_032706       |        |                 | validated |
| tarbase | hsa-miR-192-5p  | NM_052864       |        |                 | validated |
| tarbase | hsa-miR-192-5p  | NM_053048       |        |                 | validated |
| tarbase | hsa-miR-192-5p  | NM_144710       |        |                 | validated |
| tarbase | hsa-miR-192-5p  | NM_173466       |        |                 | validated |
| tarbase | hsa-miR-21-5p   | RASSF9          | 9182   | ENSG00000198774 | validated |
| tarbase | hsa-miR-21-5p   | PPAR???         |        |                 | validated |
| tarbase | hsa-miR-21-5p   | PRS6            |        |                 | validated |
| tarbase | hsa-miR-192-5p  | MZT1            | 440145 | ENSG00000204899 | validated |
| tarbase | hsa-miR-192-5p  | RP11-679B17.1   |        |                 | validated |
| tarbase | hsa-miR-192-5p  | RSE_00000212796 |        |                 | validated |
| tarbase | hsa-miR-192-5p  | RSE_00000676604 |        |                 | validated |
| tarbase | hsa-miR-106b-5p | Smad2/3         |        |                 | validated |
| tarbase | hsa-miR-21-5p   | TGF-2           |        |                 | validated |
| tarbase | hsa-miR-21-5p   | ANO3            | 63982  | ENSG00000134343 | validated |
| tarbase | hsa-miR-106b-5p | T2RII           |        |                 | validated |
| tarbase | hsa-miR-192-5p  | U29115          |        |                 | validated |
| tarbase | hsa-miR-192-5p  | U79257          |        |                 | validated |
| tarbase | hsa-miR-192-5p  | X97444          |        |                 | validated |
| tarbase | hsa-miR-192-5p  | XM_070846       |        |                 | validated |
| tarbase | hsa-miR-192-5p  | XM_170418       |        |                 | validated |
| tarbase | hsa-miR-192-5p  | XM_172878       |        |                 | validated |
| tarbase | hsa-miR-192-5p  | XM_208797       |        |                 | validated |
| tarbase | hsa-miR-192-5p  | XM_210054       |        |                 | validated |
| tarbase | hsa-miR-192-5p  | XM_210341       |        |                 | validated |
| tarbase | hsa-miR-192-5p  | XM_210560       |        |                 | validated |
| tarbase | hsa-miR-192-5p  | XM_211811       |        |                 | validated |
| tarbase | hsa-miR-192-5p  | XM_212432       |        |                 | validated |
| tarbase | hsa-miR-192-5p  | Y16700          |        |                 | validated |
| tarbase | hsa-miR-21-5p   | cyclinD1        |        |                 | validated |
| tarbase | hsa-miR-192-5p  | hCG_1790474     |        |                 | validated |
| tarbase | hsa-miR-192-5p  | hCT10607.2      |        |                 | validated |
| tarbase | hsa-miR-192-5p  | hCT14363.3      |        |                 | validated |
| tarbase | hsa-miR-192-5p  | hCT1640064.3    |        |                 | validated |
| tarbase | hsa-miR-192-5p  | hCT1640801.2    |        |                 | validated |
| tarbase | hsa-miR-192-5p  | hCT1641762.3    |        |                 | validated |
| tarbase | hsa-miR-192-5p  | hCT1642490.1    |        |                 | validated |
| tarbase | hsa-miR-192-5p  | hCT1645074.2    |        |                 | validated |
| tarbase | hsa-miR-192-5p  | hCT1648208.3    |        |                 | validated |

|         |                |              |           |
|---------|----------------|--------------|-----------|
| tarbase | hsa-miR-192-5p | hCT1770636.1 | validated |
| tarbase | hsa-miR-192-5p | hCT1776373.2 | validated |
| tarbase | hsa-miR-192-5p | hCT1788782.2 | validated |
| tarbase | hsa-miR-192-5p | hCT1812405.2 | validated |
| tarbase | hsa-miR-192-5p | hCT1819827.1 | validated |
| tarbase | hsa-miR-192-5p | hCT1831218   | validated |
| tarbase | hsa-miR-192-5p | hCT1831253.2 | validated |
| tarbase | hsa-miR-192-5p | hCT1835226.2 | validated |
| tarbase | hsa-miR-192-5p | hCT1957917.1 | validated |
| tarbase | hsa-miR-192-5p | hCT1971266.1 | validated |
| tarbase | hsa-miR-192-5p | hCT1971392.1 | validated |
| tarbase | hsa-miR-192-5p | hCT1971393.1 | validated |
| tarbase | hsa-miR-192-5p | hCT2250864   | validated |
| tarbase | hsa-miR-192-5p | hCT2255806   | validated |
| tarbase | hsa-miR-192-5p | hCT2256635   | validated |
| tarbase | hsa-miR-192-5p | hCT2259022   | validated |
| tarbase | hsa-miR-192-5p | hCT2261744   | validated |
| tarbase | hsa-miR-192-5p | hCT2283962   | validated |
| tarbase | hsa-miR-192-5p | hCT2284819   | validated |
| tarbase | hsa-miR-192-5p | hCT2285841   | validated |
| tarbase | hsa-miR-192-5p | hCT2297806   | validated |
| tarbase | hsa-miR-192-5p | hCT2306120   | validated |
| tarbase | hsa-miR-192-5p | hCT2306937   | validated |
| tarbase | hsa-miR-192-5p | hCT2309798   | validated |
| tarbase | hsa-miR-192-5p | hCT2318908   | validated |
| tarbase | hsa-miR-192-5p | hCT2318966   | validated |
| tarbase | hsa-miR-192-5p | hCT2328509   | validated |
| tarbase | hsa-miR-192-5p | hCT2328745   | validated |
| tarbase | hsa-miR-192-5p | hCT2336241   | validated |
| tarbase | hsa-miR-192-5p | hCT32256.3   | validated |

---

**Table S3. Gene Ontology terms enriched among the miRNA targeted genes.**

| ONTOLOGY | ID         | Description                                                       | Gene Ratio | BgRatio   | P-value  | P-adjust | Q-value  |
|----------|------------|-------------------------------------------------------------------|------------|-----------|----------|----------|----------|
| BP       | GO:0010498 | proteasomal protein catabolic process                             | 325/7778   | 477/18670 | 2.96E-32 | 1.91E-28 | 1.16E-28 |
| BP       | GO:0043161 | proteasome-mediated ubiquitin-dependent protein catabolic process | 290/7778   | 419/18670 | 1.03E-30 | 3.31E-27 | 2.02E-27 |
| BP       | GO:0006914 | autophagy                                                         | 324/7778   | 496/18670 | 4.67E-27 | 7.53E-24 | 4.58E-24 |
| BP       | GO:0061919 | process utilizing autophagic mechanism                            | 324/7778   | 496/18670 | 4.67E-27 | 7.53E-24 | 4.58E-24 |
| BP       | GO:2001233 | regulation of apoptotic signaling pathway                         | 272/7778   | 406/18670 | 2.10E-25 | 2.51E-22 | 1.53E-22 |
| BP       | GO:0000209 | protein polyubiquitination                                        | 219/7778   | 310/18670 | 2.34E-25 | 2.51E-22 | 1.53E-22 |
| BP       | GO:0016569 | covalent chromatin modification                                   | 304/7778   | 474/18670 | 1.59E-23 | 1.46E-20 | 8.90E-21 |
| BP       | GO:0016570 | histone modification                                              | 293/7778   | 454/18670 | 2.44E-23 | 1.97E-20 | 1.20E-20 |
| BP       | GO:0034504 | protein localization to nucleus                                   | 188/7778   | 262/18670 | 3.14E-23 | 2.25E-20 | 1.37E-20 |
| BP       | GO:0051169 | nuclear transport                                                 | 233/7778   | 346/18670 | 2.16E-22 | 1.39E-19 | 8.48E-20 |
| BP       | GO:0006913 | nucleocytoplasmic transport                                       | 231/7778   | 343/18670 | 3.22E-22 | 1.89E-19 | 1.15E-19 |
| BP       | GO:0097193 | intrinsic apoptotic signaling pathway                             | 201/7778   | 289/18670 | 4.61E-22 | 2.48E-19 | 1.51E-19 |
| BP       | GO:2001234 | negative regulation of apoptotic signaling pathway                | 167/7778   | 230/18670 | 1.13E-21 | 5.61E-19 | 3.42E-19 |
| BP       | GO:0033044 | regulation of chromosome organization                             | 229/7778   | 342/18670 | 1.55E-21 | 7.12E-19 | 4.33E-19 |
| BP       | GO:0072331 | signal transduction by p53 class mediator                         | 185/7778   | 267/18670 | 3.97E-20 | 1.70E-17 | 1.04E-17 |
| BP       | GO:0006260 | DNA replication                                                   | 188/7778   | 273/18670 | 5.76E-20 | 2.32E-17 | 1.41E-17 |
| BP       | GO:0009896 | positive regulation of catabolic process                          | 269/7778   | 425/18670 | 8.87E-20 | 3.36E-17 | 2.05E-17 |
| BP       | GO:0018205 | peptidyl-lysine modification                                      | 254/7778   | 397/18670 | 1.19E-19 | 4.27E-17 | 2.60E-17 |
| BP       | GO:0010506 | regulation of autophagy                                           | 217/7778   | 328/18670 | 1.63E-19 | 5.54E-17 | 3.37E-17 |
| BP       | GO:0016236 | macroautophagy                                                    | 199/7778   | 295/18670 | 1.90E-19 | 6.12E-17 | 3.73E-17 |
| BP       | GO:0006402 | mRNA catabolic process                                            | 236/7778   | 364/18670 | 2.05E-19 | 6.29E-17 | 3.83E-17 |
| BP       | GO:0031331 | positive regulation of cellular catabolic process                 | 234/7778   | 362/18670 | 5.10E-19 | 1.49E-16 | 9.08E-17 |
| BP       | GO:0042176 | regulation of protein catabolic process                           | 243/7778   | 381/18670 | 1.34E-18 | 3.74E-16 | 2.28E-16 |
| BP       | GO:0045787 | positive regulation of cell cycle                                 | 247/7778   | 389/18670 | 1.60E-18 | 4.29E-16 | 2.61E-16 |
| BP       | GO:0140014 | mitotic nuclear division                                          | 180/7778   | 264/18670 | 1.83E-18 | 4.68E-16 | 2.85E-16 |
| BP       | GO:0006401 | RNA catabolic process                                             | 251/7778   | 397/18670 | 1.89E-18 | 4.68E-16 | 2.85E-16 |
| BP       | GO:0031647 | regulation of protein stability                                   | 190/7778   | 284/18670 | 4.91E-18 | 1.17E-15 | 7.13E-16 |
| BP       | GO:0051168 | nuclear export                                                    | 140/7778   | 194/18670 | 5.28E-18 | 1.22E-15 | 7.40E-16 |
| BP       | GO:1901990 | regulation of mitotic cell cycle phase transition                 | 274/7778   | 444/18670 | 6.12E-18 | 1.36E-15 | 8.28E-16 |
| BP       | GO:2001020 | regulation of response to DNA damage stimulus                     | 151/7778   | 214/18670 | 7.96E-18 | 1.71E-15 | 1.04E-15 |
| BP       | GO:1901987 | regulation of cell cycle phase transition                         | 292/7778   | 480/18670 | 8.72E-18 | 1.81E-15 | 1.10E-15 |
| BP       | GO:0001701 | in utero embryonic development                                    | 236/7778   | 373/18670 | 1.75E-17 | 3.53E-15 | 2.15E-15 |
| BP       | GO:0001655 | urogenital system development                                     | 212/7778   | 330/18670 | 6.54E-17 | 1.26E-14 | 7.66E-15 |
| BP       | GO:0061458 | reproductive system development                                   | 266/7778   | 434/18670 | 6.64E-17 | 1.26E-14 | 7.66E-15 |
| BP       | GO:0033157 | regulation of intracellular protein transport                     | 169/7778   | 250/18670 | 7.36E-17 | 1.36E-14 | 8.25E-15 |
| BP       | GO:0045930 | negative regulation of mitotic cell cycle                         | 216/7778   | 338/18670 | 8.00E-17 | 1.43E-14 | 8.71E-15 |
| BP       | GO:0048608 | reproductive structure development                                | 264/7778   | 431/18670 | 9.72E-17 | 1.69E-14 | 1.03E-14 |
| BP       | GO:0010256 | endomembrane system organization                                  | 271/7778   | 445/18670 | 1.10E-16 | 1.81E-14 | 1.10E-14 |
| BP       | GO:0018105 | peptidyl-serine phosphorylation                                   | 195/7778   | 299/18670 | 1.13E-16 | 1.81E-14 | 1.10E-14 |
| BP       | GO:0070646 | protein modification by small protein removal                     | 195/7778   | 299/18670 | 1.13E-16 | 1.81E-14 | 1.10E-14 |
| BP       | GO:0048193 | Golgi vesicle transport                                           | 231/7778   | 368/18670 | 1.49E-16 | 2.34E-14 | 1.43E-14 |
| BP       | GO:0034976 | response to endoplasmic reticulum stress                          | 187/7778   | 285/18670 | 1.90E-16 | 2.91E-14 | 1.77E-14 |
| BP       | GO:0043543 | protein acylation                                                 | 167/7778   | 248/18670 | 1.98E-16 | 2.97E-14 | 1.81E-14 |
| BP       | GO:0016050 | vesicle organization                                              | 208/7778   | 325/18670 | 2.36E-16 | 3.45E-14 | 2.10E-14 |
| BP       | GO:0000075 | cell cycle checkpoint                                             | 149/7778   | 216/18670 | 3.26E-16 | 4.66E-14 | 2.84E-14 |
| BP       | GO:1903311 | regulation of mRNA metabolic process                              | 207/7778   | 324/18670 | 3.67E-16 | 4.95E-14 | 3.01E-14 |
| BP       | GO:1903829 | positive regulation of cellular protein localization              | 207/7778   | 324/18670 | 3.67E-16 | 4.95E-14 | 3.01E-14 |
| BP       | GO:0051656 | establishment of organelle localization                           | 247/7778   | 401/18670 | 3.69E-16 | 4.95E-14 | 3.01E-14 |
| BP       | GO:0044839 | cell cycle G2/M phase transition                                  | 176/7778   | 266/18670 | 4.31E-16 | 5.67E-14 | 3.45E-14 |
| BP       | GO:0097191 | extrinsic apoptotic signaling pathway                             | 153/7778   | 224/18670 | 5.20E-16 | 6.70E-14 | 4.08E-14 |
| BP       | GO:0007050 | cell cycle arrest                                                 | 160/7778   | 237/18670 | 5.91E-16 | 7.46E-14 | 4.54E-14 |
| BP       | GO:0032386 | regulation of intracellular transport                             | 230/7778   | 370/18670 | 8.77E-16 | 1.07E-13 | 6.54E-14 |
| BP       | GO:0018209 | peptidyl-serine modification                                      | 205/7778   | 322/18670 | 8.84E-16 | 1.07E-13 | 6.54E-14 |
| BP       | GO:0000086 | G2/M transition of mitotic cell cycle                             | 165/7778   | 247/18670 | 9.39E-16 | 1.12E-13 | 6.82E-14 |
| BP       | GO:0010948 | negative regulation of cell cycle process                         | 225/7778   | 361/18670 | 1.18E-15 | 1.38E-13 | 8.41E-14 |
| BP       | GO:0006611 | protein export from nucleus                                       | 127/7778   | 179/18670 | 1.63E-15 | 1.87E-13 | 1.14E-13 |
| BP       | GO:2001252 | positive regulation of chromosome organization                    | 124/7778   | 174/18670 | 2.03E-15 | 2.29E-13 | 1.40E-13 |
| BP       | GO:0016579 | protein deubiquitination                                          | 183/7778   | 283/18670 | 3.41E-15 | 3.79E-13 | 2.30E-13 |
| BP       | GO:0051052 | regulation of DNA metabolic process                               | 218/7778   | 351/18670 | 5.68E-15 | 6.20E-13 | 3.77E-13 |
| BP       | GO:0043434 | response to peptide hormone                                       | 261/7778   | 436/18670 | 7.79E-15 | 8.36E-13 | 5.09E-13 |
| BP       | GO:0006352 | DNA-templated transcription, initiation                           | 164/7778   | 249/18670 | 8.07E-15 | 8.53E-13 | 5.19E-13 |
| BP       | GO:1901796 | regulation of signal transduction by p53 class mediator           | 126/7778   | 180/18670 | 1.10E-14 | 1.14E-12 | 6.96E-13 |
| BP       | GO:0019058 | viral life cycle                                                  | 205/7778   | 328/18670 | 1.46E-14 | 1.49E-12 | 9.07E-13 |
| BP       | GO:0022604 | regulation of cell morphogenesis                                  | 284/7778   | 484/18670 | 1.74E-14 | 1.75E-12 | 1.07E-12 |
| BP       | GO:0006403 | RNA localization                                                  | 153/7778   | 230/18670 | 1.79E-14 | 1.78E-12 | 1.08E-12 |
| BP       | GO:0016573 | histone acetylation                                               | 112/7778   | 156/18670 | 1.99E-14 | 1.94E-12 | 1.18E-12 |
| BP       | GO:0061013 | regulation of mRNA catabolic process                              | 136/7778   | 199/18670 | 2.03E-14 | 1.95E-12 | 1.19E-12 |
| BP       | GO:0018394 | peptidyl-lysine acetylation                                       | 119/7778   | 169/18670 | 3.05E-14 | 2.89E-12 | 1.76E-12 |
| BP       | GO:0030111 | regulation of Wnt signaling pathway                               | 222/7778   | 363/18670 | 3.47E-14 | 3.24E-12 | 1.97E-12 |
| BP       | GO:0016311 | dephosphorylation                                                 | 280/7778   | 478/18670 | 3.56E-14 | 3.28E-12 | 2.00E-12 |
| BP       | GO:0006475 | internal protein amino acid acetylation                           | 117/7778   | 166/18670 | 4.49E-14 | 4.07E-12 | 2.48E-12 |
| BP       | GO:0018393 | internal peptidyl-lysine acetylation                              | 114/7778   | 161/18670 | 5.66E-14 | 5.06E-12 | 3.08E-12 |
| BP       | GO:1900180 | regulation of protein localization to nucleus                     | 88/7778    | 116/18670 | 6.23E-14 | 5.50E-12 | 3.35E-12 |
| BP       | GO:0030099 | myeloid cell differentiation                                      | 248/7778   | 416/18670 | 7.05E-14 | 6.06E-12 | 3.69E-12 |
| BP       | GO:0072001 | renal system development                                          | 185/7778   | 293/18670 | 7.06E-14 | 6.06E-12 | 3.69E-12 |
| BP       | GO:0048732 | gland development                                                 | 257/7778   | 434/18670 | 7.31E-14 | 6.20E-12 | 3.77E-12 |
| BP       | GO:0007093 | mitotic cell cycle checkpoint                                     | 116/7778   | 165/18670 | 7.66E-14 | 6.41E-12 | 3.90E-12 |
| BP       | GO:1902275 | regulation of chromatin organization                              | 127/7778   | 185/18670 | 8.77E-14 | 7.24E-12 | 4.41E-12 |
| BP       | GO:0006986 | response to unfolded protein                                      | 122/7778   | 176/18670 | 8.99E-14 | 7.33E-12 | 4.46E-12 |
| BP       | GO:0010639 | negative regulation of organelle organization                     | 236/7778   | 393/18670 | 9.45E-14 | 7.61E-12 | 4.63E-12 |
| BP       | GO:0001933 | negative regulation of protein phosphorylation                    | 254/7778   | 429/18670 | 1.05E-13 | 8.34E-12 | 5.08E-12 |
| BP       | GO:0060968 | regulation of gene silencing                                      | 101/7778   | 139/18670 | 1.08E-13 | 8.46E-12 | 5.15E-12 |
| BP       | GO:0015931 | nucleobase-containing compound transport                          | 157/7778   | 241/18670 | 1.23E-13 | 9.51E-12 | 5.79E-12 |
| BP       | GO:0006473 | protein acetylation                                               | 137/7778   | 204/18670 | 1.36E-13 | 1.04E-11 | 6.35E-12 |
| BP       | GO:0070482 | response to oxygen levels                                         | 236/7778   | 394/18670 | 1.39E-13 | 1.05E-11 | 6.42E-12 |
| BP       | GO:0042326 | negative regulation of phosphorylation                            | 273/7778   | 468/18670 | 1.48E-13 | 1.11E-11 | 6.74E-12 |
| BP       | GO:0009314 | response to radiation                                             | 263/7778   | 448/18670 | 1.52E-13 | 1.12E-11 | 6.83E-12 |
| BP       | GO:0043488 | regulation of mRNA stability                                      | 122/7778   | 177/18670 | 1.71E-13 | 1.25E-11 | 7.62E-12 |
| BP       | GO:1902850 | microtubule cytoskeleton organization involved in mitosis         | 96/7778    | 131/18670 | 1.84E-13 | 1.33E-11 | 8.11E-12 |

|    |            |                                                                          |          |           |          |          |          |
|----|------------|--------------------------------------------------------------------------|----------|-----------|----------|----------|----------|
| BP | GO:0030522 | intracellular receptor signaling pathway                                 | 176/7778 | 278/18670 | 2.01E-13 | 1.44E-11 | 8.75E-12 |
| BP | GO:0046822 | regulation of nucleocytoplasmic transport                                | 80/7778  | 104/18670 | 2.31E-13 | 1.64E-11 | 9.96E-12 |
| BP | GO:0043487 | regulation of RNA stability                                              | 125/7778 | 183/18670 | 2.42E-13 | 1.70E-11 | 1.03E-11 |
| BP | GO:2001242 | regulation of intrinsic apoptotic signaling pathway                      | 115/7778 | 165/18670 | 2.55E-13 | 1.76E-11 | 1.07E-11 |
| BP | GO:0051236 | establishment of RNA localization                                        | 132/7778 | 196/18670 | 2.73E-13 | 1.87E-11 | 1.14E-11 |
| BP | GO:0060964 | regulation of gene silencing by miRNA                                    | 85/7778  | 113/18670 | 3.82E-13 | 2.59E-11 | 1.58E-11 |
| BP | GO:0031396 | regulation of protein ubiquitination                                     | 136/7778 | 204/18670 | 3.93E-13 | 2.64E-11 | 1.60E-11 |
| BP | GO:0050657 | nucleic acid transport                                                   | 130/7778 | 193/18670 | 4.06E-13 | 2.67E-11 | 1.63E-11 |
| BP | GO:0050658 | RNA transport                                                            | 130/7778 | 193/18670 | 4.06E-13 | 2.67E-11 | 1.63E-11 |
| BP | GO:2001236 | regulation of extrinsic apoptotic signaling pathway                      | 109/7778 | 155/18670 | 4.18E-13 | 2.72E-11 | 1.66E-11 |
| BP | GO:0048285 | organelle fission                                                        | 262/7778 | 449/18670 | 4.37E-13 | 2.79E-11 | 1.70E-11 |
| BP | GO:0032868 | response to insulin                                                      | 172/7778 | 272/18670 | 4.38E-13 | 2.79E-11 | 1.70E-11 |
| BP | GO:0001822 | kidney development                                                       | 175/7778 | 278/18670 | 4.92E-13 | 3.11E-11 | 1.89E-11 |
| BP | GO:0035966 | response to topologically incorrect protein                              | 133/7778 | 199/18670 | 5.35E-13 | 3.35E-11 | 2.04E-11 |
| BP | GO:0060147 | regulation of posttranscriptional gene silencing                         | 87/7778  | 117/18670 | 6.24E-13 | 3.83E-11 | 2.33E-11 |
| BP | GO:0060966 | regulation of gene silencing by RNA                                      | 87/7778  | 117/18670 | 6.24E-13 | 3.83E-11 | 2.33E-11 |
| BP | GO:1903320 | regulation of protein modification by small protein conjugation or rem   | 150/7778 | 231/18670 | 6.33E-13 | 3.85E-11 | 2.34E-11 |
| BP | GO:0044843 | cell cycle G1/S phase transition                                         | 185/7778 | 298/18670 | 6.84E-13 | 4.08E-11 | 2.48E-11 |
| BP | GO:0090068 | positive regulation of cell cycle process                                | 185/7778 | 298/18670 | 6.84E-13 | 4.08E-11 | 2.48E-11 |
| BP | GO:0006338 | chromatin remodeling                                                     | 144/7778 | 220/18670 | 7.25E-13 | 4.28E-11 | 2.61E-11 |
| BP | GO:0000082 | G1/S transition of mitotic cell cycle                                    | 175/7778 | 279/18670 | 7.80E-13 | 4.57E-11 | 2.78E-11 |
| BP | GO:0001666 | response to hypoxia                                                      | 216/7778 | 359/18670 | 8.06E-13 | 4.68E-11 | 2.85E-11 |
| BP | GO:0042770 | signal transduction in response to DNA damage                            | 96/7778  | 133/18670 | 8.48E-13 | 4.88E-11 | 2.97E-11 |
| BP | GO:0051098 | regulation of binding                                                    | 223/7778 | 373/18670 | 8.57E-13 | 4.89E-11 | 2.98E-11 |
| BP | GO:0050821 | protein stabilization                                                    | 121/7778 | 178/18670 | 9.84E-13 | 5.52E-11 | 3.36E-11 |
| BP | GO:1903362 | regulation of cellular protein catabolic process                         | 158/7778 | 247/18670 | 9.85E-13 | 5.52E-11 | 3.36E-11 |
| BP | GO:0007265 | Ras protein signal transduction                                          | 260/7778 | 448/18670 | 1.24E-12 | 6.82E-11 | 4.15E-11 |
| BP | GO:0036293 | response to decreased oxygen levels                                      | 221/7778 | 370/18670 | 1.24E-12 | 6.82E-11 | 4.15E-11 |
| BP | GO:0006470 | protein dephosphorylation                                                | 196/7778 | 321/18670 | 1.35E-12 | 7.39E-11 | 4.50E-11 |
| BP | GO:0007163 | establishment or maintenance of cell polarity                            | 138/7778 | 210/18670 | 1.39E-12 | 7.52E-11 | 4.58E-11 |
| BP | GO:0048872 | homeostasis of number of cells                                           | 157/7778 | 246/18670 | 1.53E-12 | 8.21E-11 | 5.00E-11 |
| BP | GO:0006979 | response to oxidative stress                                             | 261/7778 | 451/18670 | 1.73E-12 | 9.18E-11 | 5.59E-11 |
| BP | GO:0062197 | cellular response to chemical stress                                     | 210/7778 | 350/18670 | 2.44E-12 | 1.29E-10 | 7.86E-11 |
| BP | GO:0010212 | response to ionizing radiation                                           | 103/7778 | 147/18670 | 2.64E-12 | 1.38E-10 | 8.40E-11 |
| BP | GO:1903706 | regulation of hemopoiesis                                                | 272/7778 | 475/18670 | 3.03E-12 | 1.57E-10 | 9.57E-11 |
| BP | GO:0071496 | cellular response to external stimulus                                   | 204/7778 | 339/18670 | 3.40E-12 | 1.75E-10 | 1.07E-10 |
| BP | GO:0016241 | regulation of macroautophagy                                             | 116/7778 | 171/18670 | 3.58E-12 | 1.83E-10 | 1.11E-10 |
| BP | GO:0000280 | nuclear division                                                         | 238/7778 | 407/18670 | 3.82E-12 | 1.94E-10 | 1.18E-10 |
| BP | GO:0032388 | positive regulation of intracellular transport                           | 147/7778 | 229/18670 | 4.06E-12 | 2.04E-10 | 1.24E-10 |
| BP | GO:0031503 | protein-containing complex localization                                  | 174/7778 | 281/18670 | 4.51E-12 | 2.25E-10 | 1.37E-10 |
| BP | GO:0006367 | transcription initiation from RNA polymerase II promoter                 | 125/7778 | 188/18670 | 4.61E-12 | 2.27E-10 | 1.38E-10 |
| BP | GO:2001237 | negative regulation of extrinsic apoptotic signaling pathway             | 78/7778  | 104/18670 | 4.61E-12 | 2.27E-10 | 1.38E-10 |
| BP | GO:1900034 | regulation of cellular response to heat                                  | 63/7778  | 79/18670  | 4.71E-12 | 2.30E-10 | 1.40E-10 |
| BP | GO:0010975 | regulation of neuron projection development                              | 283/7778 | 499/18670 | 4.98E-12 | 2.41E-10 | 1.47E-10 |
| BP | GO:0010821 | regulation of mitochondrion organization                                 | 120/7778 | 179/18670 | 5.28E-12 | 2.54E-10 | 1.54E-10 |
| BP | GO:0070585 | protein localization to mitochondrion                                    | 99/7778  | 141/18670 | 5.73E-12 | 2.73E-10 | 1.66E-10 |
| BP | GO:0031056 | regulation of histone modification                                       | 100/7778 | 143/18670 | 6.61E-12 | 3.13E-10 | 1.90E-10 |
| BP | GO:1902749 | regulation of cell cycle G2/M phase transition                           | 138/7778 | 213/18670 | 6.74E-12 | 3.17E-10 | 1.93E-10 |
| BP | GO:0006605 | protein targeting                                                        | 251/7778 | 435/18670 | 7.06E-12 | 3.30E-10 | 2.01E-10 |
| BP | GO:0090316 | positive regulation of intracellular protein transport                   | 118/7778 | 176/18670 | 7.84E-12 | 3.63E-10 | 2.21E-10 |
| BP | GO:0019080 | viral gene expression                                                    | 126/7778 | 191/18670 | 8.68E-12 | 3.99E-10 | 2.43E-10 |
| BP | GO:1901991 | negative regulation of mitotic cell cycle phase transition               | 156/7778 | 248/18670 | 9.76E-12 | 4.46E-10 | 2.72E-10 |
| BP | GO:0051650 | establishment of vesicle localization                                    | 122/7778 | 184/18670 | 1.10E-11 | 5.01E-10 | 3.05E-10 |
| BP | GO:1903050 | regulation of proteolysis involved in cellular protein catabolic process | 138/7778 | 214/18670 | 1.12E-11 | 5.01E-10 | 3.05E-10 |
| BP | GO:0070936 | protein K48-linked ubiquitination                                        | 48/7778  | 56/18670  | 1.12E-11 | 5.01E-10 | 3.05E-10 |
| BP | GO:0071103 | DNA conformation change                                                  | 215/7778 | 364/18670 | 1.13E-11 | 5.01E-10 | 3.05E-10 |
| BP | GO:0032869 | cellular response to insulin stimulus                                    | 139/7778 | 216/18670 | 1.18E-11 | 5.23E-10 | 3.18E-10 |
| BP | GO:0062012 | regulation of small molecule metabolic process                           | 247/7778 | 429/18670 | 1.41E-11 | 6.19E-10 | 3.77E-10 |
| BP | GO:1990778 | protein localization to cell periphery                                   | 192/7778 | 319/18670 | 1.43E-11 | 6.22E-10 | 3.79E-10 |
| BP | GO:0072655 | establishment of protein localization to mitochondrion                   | 96/7778  | 137/18670 | 1.44E-11 | 6.22E-10 | 3.79E-10 |
| BP | GO:0071214 | cellular response to abiotic stimulus                                    | 198/7778 | 331/18670 | 1.51E-11 | 6.46E-10 | 3.93E-10 |
| BP | GO:0104004 | cellular response to environmental stimulus                              | 198/7778 | 331/18670 | 1.51E-11 | 6.46E-10 | 3.93E-10 |
| BP | GO:0031570 | DNA integrity checkpoint                                                 | 107/7778 | 157/18670 | 1.56E-11 | 6.63E-10 | 4.04E-10 |
| BP | GO:0043687 | post-translational protein modification                                  | 213/7778 | 361/18670 | 1.62E-11 | 6.81E-10 | 4.15E-10 |
| BP | GO:1901988 | negative regulation of cell cycle phase transition                       | 165/7778 | 267/18670 | 2.02E-11 | 8.46E-10 | 5.15E-10 |
| BP | GO:0045931 | positive regulation of mitotic cell cycle                                | 110/7778 | 163/18670 | 2.13E-11 | 8.85E-10 | 5.39E-10 |
| BP | GO:0009408 | response to heat                                                         | 117/7778 | 176/18670 | 2.25E-11 | 9.28E-10 | 5.65E-10 |
| BP | GO:0051348 | negative regulation of transferase activity                              | 174/7778 | 285/18670 | 2.47E-11 | 1.01E-09 | 6.16E-10 |
| BP | GO:0006839 | mitochondrial transport                                                  | 160/7778 | 258/18670 | 2.73E-11 | 1.11E-09 | 6.79E-10 |
| BP | GO:0060070 | canonical Wnt signaling pathway                                          | 199/7778 | 335/18670 | 3.24E-11 | 1.31E-09 | 8.00E-10 |
| BP | GO:0070507 | regulation of microtubule cytoskeleton organization                      | 122/7778 | 186/18670 | 3.29E-11 | 1.32E-09 | 8.07E-10 |
| BP | GO:0000070 | mitotic sister chromatid segregation                                     | 103/7778 | 151/18670 | 3.45E-11 | 1.38E-09 | 8.39E-10 |
| BP | GO:0060828 | regulation of canonical Wnt signaling pathway                            | 174/7778 | 286/18670 | 3.72E-11 | 1.48E-09 | 9.00E-10 |
| BP | GO:0007088 | regulation of mitotic nuclear division                                   | 110/7778 | 164/18670 | 3.83E-11 | 1.51E-09 | 9.20E-10 |
| BP | GO:0071456 | cellular response to hypoxia                                             | 133/7778 | 207/18670 | 3.85E-11 | 1.51E-09 | 9.20E-10 |
| BP | GO:2001243 | negative regulation of intrinsic apoptotic signaling pathway             | 73/7778  | 98/18670  | 3.90E-11 | 1.52E-09 | 9.26E-10 |
| BP | GO:0019083 | viral transcription                                                      | 117/7778 | 177/18670 | 3.92E-11 | 1.52E-09 | 9.26E-10 |
| BP | GO:0006405 | RNA export from nucleus                                                  | 94/7778  | 135/18670 | 4.13E-11 | 1.59E-09 | 9.71E-10 |
| BP | GO:0034599 | cellular response to oxidative stress                                    | 182/7778 | 302/18670 | 4.16E-11 | 1.60E-09 | 9.71E-10 |
| BP | GO:0010389 | regulation of G2/M transition of mitotic cell cycle                      | 127/7778 | 196/18670 | 4.55E-11 | 1.73E-09 | 1.06E-09 |
| BP | GO:0034605 | cellular response to heat                                                | 95/7778  | 137/18670 | 4.71E-11 | 1.79E-09 | 1.09E-09 |
| BP | GO:0061136 | regulation of proteasomal protein catabolic process                      | 120/7778 | 183/18670 | 4.89E-11 | 1.84E-09 | 1.12E-09 |
| BP | GO:0016049 | cell growth                                                              | 272/7778 | 484/18670 | 4.91E-11 | 1.84E-09 | 1.12E-09 |
| BP | GO:0098727 | maintenance of cell number                                               | 107/7778 | 159/18670 | 5.18E-11 | 1.92E-09 | 1.17E-09 |
| BP | GO:0030330 | DNA damage response, signal transduction by p53 class mediator           | 78/7778  | 107/18670 | 5.20E-11 | 1.92E-09 | 1.17E-09 |
| BP | GO:0051170 | import into nucleus                                                      | 109/7778 | 163/18670 | 6.22E-11 | 2.29E-09 | 1.39E-09 |
| BP | GO:0031098 | stress-activated protein kinase signaling cascade                        | 188/7778 | 315/18670 | 6.47E-11 | 2.37E-09 | 1.44E-09 |
| BP | GO:0071375 | cellular response to peptide hormone stimulus                            | 191/7778 | 321/18670 | 6.59E-11 | 2.40E-09 | 1.46E-09 |
| BP | GO:0008630 | intrinsic apoptotic signaling pathway in response to DNA damage          | 76/7778  | 104/18670 | 7.52E-11 | 2.72E-09 | 1.66E-09 |
| BP | GO:0000077 | DNA damage checkpoint                                                    | 99/7778  | 145/18670 | 7.59E-11 | 2.73E-09 | 1.66E-09 |
| BP | GO:0001558 | regulation of cell growth                                                | 238/7778 | 416/18670 | 7.82E-11 | 2.80E-09 | 1.70E-09 |
| BP | GO:0007052 | mitotic spindle organization                                             | 77/7778  | 106/18670 | 9.17E-11 | 3.26E-09 | 1.99E-09 |

|    |            |                                                                           |          |           |          |          |          |
|----|------------|---------------------------------------------------------------------------|----------|-----------|----------|----------|----------|
| BP | GO:0090150 | establishment of protein localization to membrane                         | 196/7778 | 332/18670 | 9.69E-11 | 3.43E-09 | 2.09E-09 |
| BP | GO:0071453 | cellular response to oxygen levels                                        | 146/7778 | 234/18670 | 1.06E-10 | 3.73E-09 | 2.27E-09 |
| BP | GO:0030177 | positive regulation of Wnt signaling pathway                              | 117/7778 | 179/18670 | 1.15E-10 | 4.04E-09 | 2.46E-09 |
| BP | GO:0044766 | multi-organism transport                                                  | 50/7778  | 61/18670  | 1.19E-10 | 4.12E-09 | 2.51E-09 |
| BP | GO:1902579 | multi-organism localization                                               | 50/7778  | 61/18670  | 1.19E-10 | 4.12E-09 | 2.51E-09 |
| BP | GO:0036294 | cellular response to decreased oxygen levels                              | 137/7778 | 217/18670 | 1.21E-10 | 4.18E-09 | 2.55E-09 |
| BP | GO:0048511 | rhythmic process                                                          | 177/7778 | 295/18670 | 1.27E-10 | 4.37E-09 | 2.66E-09 |
| BP | GO:0010769 | regulation of cell morphogenesis involved in differentiation              | 180/7778 | 301/18670 | 1.31E-10 | 4.46E-09 | 2.71E-09 |
| BP | GO:0019827 | stem cell population maintenance                                          | 105/7778 | 157/18670 | 1.37E-10 | 4.66E-09 | 2.84E-09 |
| BP | GO:0006513 | protein monoubiquitination                                                | 53/7778  | 66/18670  | 1.46E-10 | 4.91E-09 | 2.99E-09 |
| BP | GO:0044786 | cell cycle DNA replication                                                | 56/7778  | 71/18670  | 1.62E-10 | 5.45E-09 | 3.32E-09 |
| BP | GO:0045732 | positive regulation of protein catabolic process                          | 135/7778 | 214/18670 | 1.79E-10 | 5.98E-09 | 3.64E-09 |
| BP | GO:0071902 | positive regulation of protein serine/threonine kinase activity           | 196/7778 | 334/18670 | 1.99E-10 | 6.60E-09 | 4.02E-09 |
| BP | GO:0016197 | endosomal transport                                                       | 141/7778 | 226/18670 | 2.21E-10 | 7.32E-09 | 4.45E-09 |
| BP | GO:0072332 | intrinsic apoptotic signaling pathway by p53 class mediator               | 60/7778  | 78/18670  | 2.31E-10 | 7.58E-09 | 4.62E-09 |
| BP | GO:0046794 | transport of virus                                                        | 49/7778  | 60/18670  | 2.36E-10 | 7.71E-09 | 4.69E-09 |
| BP | GO:0098732 | macromolecule deacylation                                                 | 75/7778  | 104/18670 | 2.83E-10 | 9.20E-09 | 5.60E-09 |
| BP | GO:0007059 | chromosome segregation                                                    | 189/7778 | 321/18670 | 2.85E-10 | 9.21E-09 | 5.61E-09 |
| BP | GO:0006302 | double-strand break repair                                                | 152/7778 | 248/18670 | 2.95E-10 | 9.46E-09 | 5.76E-09 |
| BP | GO:0071383 | cellular response to steroid hormone stimulus                             | 152/7778 | 248/18670 | 2.95E-10 | 9.46E-09 | 5.76E-09 |
| BP | GO:0034620 | cellular response to unfolded protein                                     | 95/7778  | 140/18670 | 3.08E-10 | 9.82E-09 | 5.98E-09 |
| BP | GO:0001503 | ossification                                                              | 227/7778 | 398/18670 | 3.16E-10 | 1.00E-08 | 6.10E-09 |
| BP | GO:0051648 | vesicle localization                                                      | 128/7778 | 202/18670 | 3.44E-10 | 1.09E-08 | 6.62E-09 |
| BP | GO:0051403 | stress-activated MAPK cascade                                             | 171/7778 | 286/18670 | 3.84E-10 | 1.20E-08 | 7.32E-09 |
| BP | GO:0006469 | negative regulation of protein kinase activity                            | 145/7778 | 235/18670 | 3.85E-10 | 1.20E-08 | 7.32E-09 |
| BP | GO:0070997 | neuron death                                                              | 202/7778 | 348/18670 | 3.91E-10 | 1.22E-08 | 7.41E-09 |
| BP | GO:0030010 | establishment of cell polarity                                            | 92/7778  | 135/18670 | 4.11E-10 | 1.27E-08 | 7.74E-09 |
| BP | GO:2001251 | negative regulation of chromosome organization                            | 98/7778  | 146/18670 | 4.13E-10 | 1.27E-08 | 7.74E-09 |
| BP | GO:0051054 | positive regulation of DNA metabolic process                              | 122/7778 | 191/18670 | 4.24E-10 | 1.30E-08 | 7.93E-09 |
| BP | GO:0032479 | regulation of type I interferon production                                | 87/7778  | 126/18670 | 4.32E-10 | 1.32E-08 | 8.02E-09 |
| BP | GO:2000756 | regulation of peptidyl-lysine acetylation                                 | 48/7778  | 59/18670  | 4.65E-10 | 1.41E-08 | 8.61E-09 |
| BP | GO:0032606 | type I interferon production                                              | 88/7778  | 128/18670 | 4.87E-10 | 1.47E-08 | 8.97E-09 |
| BP | GO:0043903 | regulation of interspecies interactions between organisms                 | 138/7778 | 222/18670 | 4.92E-10 | 1.47E-08 | 8.97E-09 |
| BP | GO:0032392 | DNA geometric change                                                      | 83/7778  | 119/18670 | 4.94E-10 | 1.47E-08 | 8.97E-09 |
| BP | GO:0035601 | protein deacylation                                                       | 74/7778  | 103/18670 | 4.94E-10 | 1.47E-08 | 8.97E-09 |
| BP | GO:0030705 | cytoskeleton-dependent intracellular transport                            | 116/7778 | 180/18670 | 5.11E-10 | 1.52E-08 | 9.23E-09 |
| BP | GO:1905897 | regulation of response to endoplasmic reticulum stress                    | 63/7778  | 84/18670  | 5.23E-10 | 1.55E-08 | 9.42E-09 |
| BP | GO:0051028 | mRNA transport                                                            | 101/7778 | 152/18670 | 5.35E-10 | 1.58E-08 | 9.59E-09 |
| BP | GO:1903578 | regulation of ATP metabolic process                                       | 84/7778  | 121/18670 | 5.63E-10 | 1.65E-08 | 1.00E-08 |
| BP | GO:0009615 | response to virus                                                         | 189/7778 | 323/18670 | 5.79E-10 | 1.69E-08 | 1.03E-08 |
| BP | GO:1900182 | positive regulation of protein localization to nucleus                    | 57/7778  | 74/18670  | 5.94E-10 | 1.72E-08 | 1.05E-08 |
| BP | GO:0006606 | protein import into nucleus                                               | 96/7778  | 143/18670 | 6.13E-10 | 1.77E-08 | 1.08E-08 |
| BP | GO:0051783 | regulation of nuclear division                                            | 120/7778 | 188/18670 | 6.28E-10 | 1.80E-08 | 1.10E-08 |
| BP | GO:0016482 | cytosolic transport                                                       | 104/7778 | 158/18670 | 6.76E-10 | 1.93E-08 | 1.18E-08 |
| BP | GO:0017038 | protein import                                                            | 122/7778 | 192/18670 | 6.88E-10 | 1.96E-08 | 1.19E-08 |
| BP | GO:0045862 | positive regulation of proteolysis                                        | 206/7778 | 358/18670 | 7.42E-10 | 2.11E-08 | 1.28E-08 |
| BP | GO:2000058 | regulation of ubiquitin-dependent protein catabolic process               | 99/7778  | 149/18670 | 7.96E-10 | 2.25E-08 | 1.37E-08 |
| BP | GO:0071426 | ribonucleoprotein complex export from nucleus                             | 87/7778  | 127/18670 | 8.11E-10 | 2.28E-08 | 1.39E-08 |
| BP | GO:0071479 | cellular response to ionizing radiation                                   | 55/7778  | 71/18670  | 8.16E-10 | 2.29E-08 | 1.39E-08 |
| BP | GO:0060562 | epithelial tube morphogenesis                                             | 188/7778 | 322/18670 | 8.23E-10 | 2.30E-08 | 1.40E-08 |
| BP | GO:0016358 | dendrite development                                                      | 143/7778 | 233/18670 | 8.61E-10 | 2.39E-08 | 1.45E-08 |
| BP | GO:0006261 | DNA-dependent DNA replication                                             | 100/7778 | 151/18670 | 8.63E-10 | 2.39E-08 | 1.45E-08 |
| BP | GO:0046777 | protein autophosphorylation                                               | 144/7778 | 235/18670 | 8.79E-10 | 2.42E-08 | 1.47E-08 |
| BP | GO:1901653 | cellular response to peptide                                              | 219/7778 | 385/18670 | 8.92E-10 | 2.45E-08 | 1.49E-08 |
| BP | GO:0007051 | spindle organization                                                      | 110/7778 | 170/18670 | 1.00E-09 | 2.73E-08 | 1.66E-08 |
| BP | GO:0000819 | sister chromatid segregation                                              | 120/7778 | 189/18670 | 1.02E-09 | 2.76E-08 | 1.68E-08 |
| BP | GO:2000027 | regulation of animal organ morphogenesis                                  | 153/7778 | 253/18670 | 1.02E-09 | 2.77E-08 | 1.69E-08 |
| BP | GO:0033673 | negative regulation of kinase activity                                    | 155/7778 | 257/18670 | 1.05E-09 | 2.82E-08 | 1.72E-08 |
| BP | GO:0035329 | hippo signaling                                                           | 34/7778  | 38/18670  | 1.06E-09 | 2.82E-08 | 1.72E-08 |
| BP | GO:0097064 | ncRNA export from nucleus                                                 | 34/7778  | 38/18670  | 1.06E-09 | 2.82E-08 | 1.72E-08 |
| BP | GO:0019079 | viral genome replication                                                  | 84/7778  | 122/18670 | 1.07E-09 | 2.84E-08 | 1.73E-08 |
| BP | GO:0032434 | regulation of proteasomal ubiquitin-dependent protein catabolic process   | 84/7778  | 122/18670 | 1.07E-09 | 2.84E-08 | 1.73E-08 |
| BP | GO:0035967 | cellular response to topologically incorrect protein                      | 105/7778 | 161/18670 | 1.23E-09 | 3.26E-08 | 1.98E-08 |
| BP | GO:1904951 | positive regulation of establishment of protein localization              | 253/7778 | 456/18670 | 1.25E-09 | 3.28E-08 | 2.00E-08 |
| BP | GO:0051817 | modulation of process of other organism involved in symbiotic interaction | 71/7778  | 99/18670  | 1.26E-09 | 3.29E-08 | 2.01E-08 |
| BP | GO:0043401 | steroid hormone mediated signaling pathway                                | 116/7778 | 182/18670 | 1.37E-09 | 3.58E-08 | 2.18E-08 |
| BP | GO:0000956 | nuclear-transcribed mRNA catabolic process                                | 129/7778 | 207/18670 | 1.42E-09 | 3.69E-08 | 2.25E-08 |
| BP | GO:0071166 | ribonucleoprotein complex localization                                    | 87/7778  | 128/18670 | 1.50E-09 | 3.88E-08 | 2.36E-08 |
| BP | GO:0072659 | protein localization to plasma membrane                                   | 156/7778 | 260/18670 | 1.57E-09 | 4.05E-08 | 2.46E-08 |
| BP | GO:0010770 | positive regulation of cell morphogenesis involved in differentiation     | 101/7778 | 154/18670 | 1.60E-09 | 4.11E-08 | 2.50E-08 |
| BP | GO:0009411 | response to UV                                                            | 94/7778  | 141/18670 | 1.62E-09 | 4.14E-08 | 2.52E-08 |
| BP | GO:0000910 | cytokinesis                                                               | 110/7778 | 171/18670 | 1.66E-09 | 4.23E-08 | 2.57E-08 |
| BP | GO:0051983 | regulation of chromosome segregation                                      | 73/7778  | 103/18670 | 1.75E-09 | 4.42E-08 | 2.69E-08 |
| BP | GO:1905269 | positive regulation of chromatin organization                             | 73/7778  | 103/18670 | 1.75E-09 | 4.42E-08 | 2.69E-08 |
| BP | GO:0030968 | endoplasmic reticulum unfolded protein response                           | 83/7778  | 121/18670 | 1.79E-09 | 4.48E-08 | 2.73E-08 |
| BP | GO:0075733 | intracellular transport of virus                                          | 46/7778  | 57/18670  | 1.79E-09 | 4.48E-08 | 2.73E-08 |
| BP | GO:0001649 | osteoblast differentiation                                                | 138/7778 | 225/18670 | 1.79E-09 | 4.48E-08 | 2.73E-08 |
| BP | GO:0009266 | response to temperature stimulus                                          | 147/7778 | 243/18670 | 2.10E-09 | 5.22E-08 | 3.18E-08 |
| BP | GO:0050792 | regulation of viral process                                               | 129/7778 | 208/18670 | 2.21E-09 | 5.48E-08 | 3.33E-08 |
| BP | GO:0032147 | activation of protein kinase activity                                     | 192/7778 | 333/18670 | 2.23E-09 | 5.51E-08 | 3.35E-08 |
| BP | GO:1903364 | positive regulation of cellular protein catabolic process                 | 93/7778  | 140/18670 | 2.62E-09 | 6.43E-08 | 3.92E-08 |
| BP | GO:0006476 | protein deacetylation                                                     | 67/7778  | 93/18670  | 2.69E-09 | 6.59E-08 | 4.01E-08 |
| BP | GO:0043467 | regulation of generation of precursor metabolites and energy              | 102/7778 | 157/18670 | 2.90E-09 | 7.07E-08 | 4.31E-08 |
| BP | GO:0000079 | regulation of cyclin-dependent protein serine/threonine kinase activity   | 72/7778  | 102/18670 | 3.00E-09 | 7.29E-08 | 4.44E-08 |
| BP | GO:2001021 | negative regulation of response to DNA damage stimulus                    | 60/7778  | 81/18670  | 3.09E-09 | 7.49E-08 | 4.56E-08 |
| BP | GO:0006282 | regulation of DNA repair                                                  | 83/7778  | 122/18670 | 3.1E-09  | 7.99E-08 | 4.86E-08 |
| BP | GO:0009895 | negative regulation of catabolic process                                  | 179/7778 | 308/18670 | 3.38E-09 | 8.13E-08 | 4.95E-08 |
| BP | GO:1903322 | positive regulation of protein modification by small protein conjugation  | 90/7778  | 135/18670 | 3.58E-09 | 8.57E-08 | 5.22E-08 |
| BP | GO:0008637 | apoptotic mitochondrial changes                                           | 84/7778  | 124/18670 | 3.7E-09  | 8.76E-08 | 5.34E-08 |
| BP | GO:0034502 | protein localization to chromosome                                        | 61/7778  | 83/18670  | 3.85E-09 | 9.14E-08 | 5.57E-08 |
| BP | GO:1904029 | regulation of cyclin-dependent protein kinase activity                    | 74/7778  | 106/18670 | 4.00E-09 | 9.47E-08 | 5.76E-08 |
| BP | GO:0043405 | regulation of MAP kinase activity                                         | 193/7778 | 337/18670 | 4.25E-09 | 1.00E-07 | 6.10E-08 |



|    |            |                                                                                   |          |           |          |          |          |
|----|------------|-----------------------------------------------------------------------------------|----------|-----------|----------|----------|----------|
| BP | GO:0031398 | positive regulation of protein ubiquitination                                     | 80/7778  | 117/18670 | 4.41E-09 | 1.04E-07 | 6.32E-08 |
| BP | GO:0035065 | regulation of histone acetylation                                                 | 43/7778  | 53/18670  | 4.49E-09 | 1.05E-07 | 6.40E-08 |
| BP | GO:0032200 | telomere organization                                                             | 111/7778 | 175/18670 | 4.62E-09 | 1.08E-07 | 6.57E-08 |
| BP | GO:0031330 | negative regulation of cellular catabolic process                                 | 151/7778 | 253/18670 | 4.76E-09 | 1.11E-07 | 6.74E-08 |
| BP | GO:0006997 | nucleus organization                                                              | 87/7778  | 130/18670 | 4.88E-09 | 1.13E-07 | 6.88E-08 |
| BP | GO:0048813 | dendrite morphogenesis                                                            | 94/7778  | 143/18670 | 4.90E-09 | 1.13E-07 | 6.88E-08 |
| BP | GO:0050673 | epithelial cell proliferation                                                     | 240/7778 | 434/18670 | 4.93E-09 | 1.13E-07 | 6.91E-08 |
| BP | GO:0032508 | DNA duplex unwinding                                                              | 76/7778  | 110/18670 | 5.18E-09 | 1.19E-07 | 7.23E-08 |
| BP | GO:0043618 | regulation of transcription from RNA polymerase II promoter in response to stress | 82/7778  | 121/18670 | 5.46E-09 | 1.25E-07 | 7.59E-08 |
| BP | GO:0002262 | myeloid cell homeostasis                                                          | 96/7778  | 147/18670 | 5.62E-09 | 1.28E-07 | 7.79E-08 |
| BP | GO:0031346 | positive regulation of cell projection organization                               | 215/7778 | 383/18670 | 5.86E-09 | 1.33E-07 | 8.10E-08 |
| BP | GO:0071478 | cellular response to radiation                                                    | 119/7778 | 191/18670 | 6.20E-09 | 1.40E-07 | 8.54E-08 |
| BP | GO:0007548 | sex differentiation                                                               | 159/7778 | 270/18670 | 7.10E-09 | 1.60E-07 | 9.74E-08 |
| BP | GO:0061418 | regulation of transcription from RNA polymerase II promoter in response to stress | 57/7778  | 77/18670  | 7.98E-09 | 1.79E-07 | 1.09E-07 |
| BP | GO:0032984 | protein-containing complex disassembly                                            | 185/7778 | 323/18670 | 8.75E-09 | 1.96E-07 | 1.19E-07 |
| BP | GO:0034401 | chromatin organization involved in regulation of transcription                    | 88/7778  | 133/18670 | 9.32E-09 | 2.08E-07 | 1.26E-07 |
| BP | GO:1902115 | regulation of organelle assembly                                                  | 120/7778 | 194/18670 | 9.91E-09 | 2.20E-07 | 1.34E-07 |
| BP | GO:0045814 | negative regulation of gene expression, epigenetic                                | 71/7778  | 102/18670 | 1.00E-08 | 2.22E-07 | 1.35E-07 |
| BP | GO:0071559 | response to transforming growth factor beta                                       | 151/7778 | 255/18670 | 1.01E-08 | 2.22E-07 | 1.35E-07 |
| BP | GO:0046824 | positive regulation of nucleocytoplasmic transport                                | 48/7778  | 62/18670  | 1.02E-08 | 2.22E-07 | 1.35E-07 |
| BP | GO:0001763 | morphogenesis of a branching structure                                            | 121/7778 | 196/18670 | 1.02E-08 | 2.22E-07 | 1.35E-07 |
| BP | GO:0071897 | DNA biosynthetic process                                                          | 121/7778 | 196/18670 | 1.02E-08 | 2.22E-07 | 1.35E-07 |
| BP | GO:0001890 | placenta development                                                              | 98/7778  | 152/18670 | 1.06E-08 | 2.31E-07 | 1.41E-07 |
| BP | GO:0006892 | post-Golgi vesicle-mediated transport                                             | 72/7778  | 104/18670 | 1.14E-08 | 2.47E-07 | 1.50E-07 |
| BP | GO:2001235 | positive regulation of apoptotic signaling pathway                                | 112/7778 | 179/18670 | 1.22E-08 | 2.63E-07 | 1.60E-07 |
| BP | GO:0032886 | regulation of microtubule-based process                                           | 132/7778 | 218/18670 | 1.26E-08 | 2.71E-07 | 1.65E-07 |
| BP | GO:0044774 | mitotic DNA integrity checkpoint                                                  | 73/7778  | 106/18670 | 1.29E-08 | 2.76E-07 | 1.68E-07 |
| BP | GO:0007044 | cell-substrate junction assembly                                                  | 68/7778  | 97/18670  | 1.29E-08 | 2.76E-07 | 1.68E-07 |
| BP | GO:0150115 | cell-substrate junction organization                                              | 68/7778  | 97/18670  | 1.29E-08 | 2.76E-07 | 1.68E-07 |
| BP | GO:0008380 | RNA splicing                                                                      | 255/7778 | 469/18670 | 1.34E-08 | 2.85E-07 | 1.74E-07 |
| BP | GO:0000723 | telomere maintenance                                                              | 103/7778 | 162/18670 | 1.36E-08 | 2.89E-07 | 1.76E-07 |
| BP | GO:0044783 | G1 DNA damage checkpoint                                                          | 49/7778  | 64/18670  | 1.37E-08 | 2.90E-07 | 1.76E-07 |
| BP | GO:1905475 | regulation of protein localization to membrane                                    | 116/7778 | 187/18670 | 1.38E-08 | 2.90E-07 | 1.76E-07 |
| BP | GO:0035196 | production of miRNAs involved in gene silencing by miRNA                          | 38/7778  | 46/18670  | 1.39E-08 | 2.92E-07 | 1.78E-07 |
| BP | GO:0031668 | cellular response to extracellular stimulus                                       | 157/7778 | 268/18670 | 1.45E-08 | 3.03E-07 | 1.85E-07 |
| BP | GO:0019693 | ribose phosphate metabolic process                                                | 233/7778 | 424/18670 | 1.70E-08 | 3.55E-07 | 2.16E-07 |
| BP | GO:0031050 | dsRNA processing                                                                  | 41/7778  | 51/18670  | 1.72E-08 | 3.56E-07 | 2.17E-07 |
| BP | GO:0070918 | production of small RNA involved in gene silencing by RNA                         | 41/7778  | 51/18670  | 1.72E-08 | 3.56E-07 | 2.17E-07 |
| BP | GO:0035303 | regulation of dephosphorylation                                                   | 127/7778 | 209/18670 | 1.75E-08 | 3.61E-07 | 2.20E-07 |
| BP | GO:1901214 | regulation of neuron death                                                        | 179/7778 | 313/18670 | 1.77E-08 | 3.64E-07 | 2.21E-07 |
| BP | GO:0061008 | hepaticobiliary system development                                                | 90/7778  | 138/18670 | 1.84E-08 | 3.77E-07 | 2.30E-07 |
| BP | GO:0031589 | cell-substrate adhesion                                                           | 199/7778 | 354/18670 | 1.84E-08 | 3.77E-07 | 2.30E-07 |
| BP | GO:0043393 | regulation of protein binding                                                     | 131/7778 | 217/18670 | 1.85E-08 | 3.77E-07 | 2.30E-07 |
| BP | GO:0006457 | protein folding                                                                   | 136/7778 | 227/18670 | 1.95E-08 | 3.97E-07 | 2.42E-07 |
| BP | GO:1901983 | regulation of protein acetylation                                                 | 54/7778  | 73/18670  | 2.06E-08 | 4.16E-07 | 2.53E-07 |
| BP | GO:0043620 | regulation of DNA-templated transcription in response to stress                   | 84/7778  | 127/18670 | 2.06E-08 | 4.16E-07 | 2.53E-07 |
| BP | GO:0071560 | cellular response to transforming growth factor beta stimulus                     | 147/7778 | 249/18670 | 2.07E-08 | 4.16E-07 | 2.53E-07 |
| BP | GO:0043470 | regulation of carbohydrate catabolic process                                      | 62/7778  | 87/18670  | 2.07E-08 | 4.16E-07 | 2.53E-07 |
| BP | GO:0010970 | transport along microtubule                                                       | 102/7778 | 161/18670 | 2.11E-08 | 4.21E-07 | 2.56E-07 |
| BP | GO:0010822 | positive regulation of mitochondrion organization                                 | 78/7778  | 116/18670 | 2.18E-08 | 4.34E-07 | 2.64E-07 |
| BP | GO:2000736 | regulation of stem cell differentiation                                           | 78/7778  | 116/18670 | 2.18E-08 | 4.34E-07 | 2.64E-07 |
| BP | GO:0006409 | tRNA export from nucleus                                                          | 30/7778  | 34/18670  | 2.24E-08 | 4.43E-07 | 2.70E-07 |
| BP | GO:0071431 | tRNA-containing ribonucleoprotein complex export from nucleus                     | 30/7778  | 34/18670  | 2.24E-08 | 4.43E-07 | 2.70E-07 |
| BP | GO:0048524 | positive regulation of viral process                                              | 73/7778  | 107/18670 | 2.40E-08 | 4.73E-07 | 2.88E-07 |
| BP | GO:0031124 | mRNA 3'-end processing                                                            | 68/7778  | 98/18670  | 2.50E-08 | 4.92E-07 | 2.99E-07 |
| BP | GO:0031571 | mitotic G1 DNA damage checkpoint                                                  | 48/7778  | 63/18670  | 2.54E-08 | 4.96E-07 | 3.02E-07 |
| BP | GO:0044819 | mitotic G1/S transition checkpoint                                                | 48/7778  | 63/18670  | 2.54E-08 | 4.96E-07 | 3.02E-07 |
| BP | GO:0046034 | ATP metabolic process                                                             | 174/7778 | 304/18670 | 2.56E-08 | 4.98E-07 | 3.03E-07 |
| BP | GO:0016925 | protein sumoylation                                                               | 59/7778  | 82/18670  | 2.57E-08 | 4.98E-07 | 3.03E-07 |
| BP | GO:0006090 | pyruvate metabolic process                                                        | 96/7778  | 150/18670 | 2.59E-08 | 5.01E-07 | 3.05E-07 |
| BP | GO:0001889 | liver development                                                                 | 88/7778  | 135/18670 | 2.74E-08 | 5.28E-07 | 3.21E-07 |
| BP | GO:0061640 | cytoskeleton-dependent cytokinesis                                                | 69/7778  | 100/18670 | 2.84E-08 | 5.44E-07 | 3.31E-07 |
| BP | GO:0070498 | interleukin-1-mediated signaling pathway                                          | 69/7778  | 100/18670 | 2.84E-08 | 5.44E-07 | 3.31E-07 |
| BP | GO:0007409 | axonogenesis                                                                      | 253/7778 | 468/18670 | 3.01E-08 | 5.75E-07 | 3.50E-07 |
| BP | GO:0009259 | ribonucleotide metabolic process                                                  | 227/7778 | 414/18670 | 3.32E-08 | 6.32E-07 | 3.85E-07 |
| BP | GO:0007034 | vacuolar transport                                                                | 92/7778  | 143/18670 | 3.46E-08 | 6.58E-07 | 4.01E-07 |
| BP | GO:0033260 | nuclear DNA replication                                                           | 46/7778  | 60/18670  | 3.55E-08 | 6.73E-07 | 4.10E-07 |
| BP | GO:1901800 | positive regulation of proteasomal protein catabolic process                      | 71/7778  | 104/18670 | 3.57E-08 | 6.75E-07 | 4.11E-07 |
| BP | GO:0045069 | regulation of viral genome replication                                            | 66/7778  | 95/18670  | 3.71E-08 | 6.99E-07 | 4.26E-07 |
| BP | GO:0030518 | intracellular steroid hormone receptor signaling pathway                          | 85/7778  | 130/18670 | 3.81E-08 | 7.15E-07 | 4.35E-07 |
| BP | GO:0090263 | positive regulation of canonical Wnt signaling pathway                            | 94/7778  | 147/18670 | 3.84E-08 | 7.18E-07 | 4.37E-07 |
| BP | GO:0048863 | stem cell differentiation                                                         | 150/7778 | 257/18670 | 4.20E-08 | 7.84E-07 | 4.77E-07 |
| BP | GO:0044773 | mitotic DNA damage checkpoint                                                     | 67/7778  | 97/18670  | 4.21E-08 | 7.84E-07 | 4.77E-07 |
| BP | GO:0045637 | regulation of myeloid cell differentiation                                        | 147/7778 | 251/18670 | 4.23E-08 | 7.85E-07 | 4.78E-07 |
| BP | GO:0051222 | positive regulation of protein transport                                          | 239/7778 | 440/18670 | 4.24E-08 | 7.85E-07 | 4.78E-07 |
| BP | GO:0018210 | peptidyl-threonine modification                                                   | 87/7778  | 134/18670 | 4.33E-08 | 7.97E-07 | 4.85E-07 |
| BP | GO:0022406 | membrane docking                                                                  | 110/7778 | 178/18670 | 4.33E-08 | 7.97E-07 | 4.85E-07 |
| BP | GO:0006275 | regulation of DNA replication                                                     | 73/7778  | 108/18670 | 4.40E-08 | 8.07E-07 | 4.91E-07 |
| BP | GO:0051031 | tRNA transport                                                                    | 31/7778  | 36/18670  | 4.52E-08 | 8.28E-07 | 5.04E-07 |
| BP | GO:0061138 | morphogenesis of a branching epithelium                                           | 112/7778 | 182/18670 | 4.55E-08 | 8.30E-07 | 5.05E-07 |
| BP | GO:0032922 | circadian regulation of gene expression                                           | 47/7778  | 62/18670  | 4.69E-08 | 8.50E-07 | 5.18E-07 |
| BP | GO:0070059 | intrinsic apoptotic signaling pathway in response to endoplasmic reticulum stress | 47/7778  | 62/18670  | 4.69E-08 | 8.50E-07 | 5.18E-07 |
| BP | GO:0031058 | positive regulation of histone modification                                       | 63/7778  | 90/18670  | 4.81E-08 | 8.70E-07 | 5.30E-07 |
| BP | GO:0003279 | cardiac septum development                                                        | 75/7778  | 112/18670 | 5.30E-08 | 9.56E-07 | 5.82E-07 |
| BP | GO:0007033 | vacuole organization                                                              | 102/7778 | 163/18670 | 5.32E-08 | 9.56E-07 | 5.82E-07 |
| BP | GO:0071824 | protein-DNA complex subunit organization                                          | 165/7778 | 288/18670 | 5.33E-08 | 9.56E-07 | 5.82E-07 |
| BP | GO:0043087 | regulation of GTPase activity                                                     | 257/7778 | 479/18670 | 5.67E-08 | 1.02E-06 | 6.18E-07 |
| BP | GO:0006888 | endoplasmic reticulum to Golgi vesicle-mediated transport                         | 127/7778 | 212/18670 | 5.73E-08 | 1.02E-06 | 6.23E-07 |
| BP | GO:0035264 | multicellular organism growth                                                     | 93/7778  | 146/18670 | 5.95E-08 | 1.06E-06 | 6.45E-07 |
| BP | GO:0048545 | response to steroid hormone                                                       | 211/7778 | 383/18670 | 6.13E-08 | 1.09E-06 | 6.62E-07 |
| BP | GO:1901532 | regulation of hematopoietic progenitor cell differentiation                       | 60/7778  | 85/18670  | 6.15E-08 | 1.09E-06 | 6.63E-07 |
| BP | GO:0035148 | tube formation                                                                    | 94/7778  | 148/18670 | 6.23E-08 | 1.10E-06 | 6.69E-07 |

|    |            |                                                                           |          |           |          |          |          |
|----|------------|---------------------------------------------------------------------------|----------|-----------|----------|----------|----------|
| BP | GO:1901216 | positive regulation of neuron death                                       | 65/7778  | 94/18670  | 6.25E-08 | 1.10E-06 | 6.70E-07 |
| BP | GO:0043254 | regulation of protein-containing complex assembly                         | 233/7778 | 429/18670 | 6.32E-08 | 1.11E-06 | 6.75E-07 |
| BP | GO:0001841 | neural tube formation                                                     | 71/7778  | 105/18670 | 6.54E-08 | 1.15E-06 | 6.97E-07 |
| BP | GO:0030521 | androgen receptor signaling pathway                                       | 45/7778  | 59/18670  | 6.59E-08 | 1.15E-06 | 7.00E-07 |
| BP | GO:0051099 | positive regulation of binding                                            | 110/7778 | 179/18670 | 6.65E-08 | 1.16E-06 | 7.04E-07 |
| BP | GO:1903052 | positive regulation of proteolysis involved in cellular protein catabolic | 79/7778  | 120/18670 | 7.32E-08 | 1.27E-06 | 7.74E-07 |
| BP | GO:0007179 | transforming growth factor beta receptor signaling pathway                | 120/7778 | 199/18670 | 7.87E-08 | 1.36E-06 | 8.30E-07 |
| BP | GO:0030278 | regulation of ossification                                                | 122/7778 | 203/18670 | 8.05E-08 | 1.39E-06 | 8.45E-07 |
| BP | GO:0007249 | I-kappaB kinase/NF-kappaB signaling                                       | 155/7778 | 269/18670 | 8.06E-08 | 1.39E-06 | 8.45E-07 |
| BP | GO:0002244 | hematopoietic progenitor cell differentiation                             | 103/7778 | 166/18670 | 8.58E-08 | 1.46E-06 | 8.91E-07 |
| BP | GO:0045137 | development of primary sexual characteristics                             | 132/7778 | 223/18670 | 8.60E-08 | 1.46E-06 | 8.91E-07 |
| BP | GO:1903902 | positive regulation of viral life cycle                                   | 46/7778  | 61/18670  | 8.60E-08 | 1.46E-06 | 8.91E-07 |
| BP | GO:0006406 | mRNA export from nucleus                                                  | 74/7778  | 111/18670 | 8.61E-08 | 1.46E-06 | 8.91E-07 |
| BP | GO:0071427 | mRNA-containing ribonucleoprotein complex export from nucleus             | 74/7778  | 111/18670 | 8.61E-08 | 1.46E-06 | 8.91E-07 |
| BP | GO:0018107 | peptidyl-threonine phosphorylation                                        | 82/7778  | 126/18670 | 8.97E-08 | 1.52E-06 | 9.26E-07 |
| BP | GO:0043200 | response to amino acid                                                    | 75/7778  | 113/18670 | 9.35E-08 | 1.58E-06 | 9.63E-07 |
| BP | GO:0071230 | cellular response to amino acid stimulus                                  | 50/7778  | 68/18670  | 9.53E-08 | 1.61E-06 | 9.78E-07 |
| BP | GO:0009267 | cellular response to starvation                                           | 94/7778  | 149/18670 | 9.99E-08 | 1.68E-06 | 1.02E-06 |
| BP | GO:0019216 | regulation of lipid metabolic process                                     | 223/7778 | 410/18670 | 1.04E-07 | 1.74E-06 | 1.06E-06 |
| BP | GO:0006903 | vesicle targeting                                                         | 64/7778  | 93/18670  | 1.05E-07 | 1.75E-06 | 1.07E-06 |
| BP | GO:0016575 | histone deacetylation                                                     | 55/7778  | 77/18670  | 1.14E-07 | 1.91E-06 | 1.16E-06 |
| BP | GO:0007623 | circadian rhythm                                                          | 124/7778 | 208/18670 | 1.20E-07 | 2.00E-06 | 1.22E-06 |
| BP | GO:0006890 | retrograde vesicle-mediated transport, Golgi to endoplasmic reticulum     | 60/7778  | 86/18670  | 1.21E-07 | 2.01E-06 | 1.22E-06 |
| BP | GO:0045815 | positive regulation of gene expression, epigenetic                        | 44/7778  | 58/18670  | 1.22E-07 | 2.01E-06 | 1.23E-06 |
| BP | GO:0051090 | regulation of DNA-binding transcription factor activity                   | 233/7778 | 432/18670 | 1.34E-07 | 2.22E-06 | 1.35E-06 |
| BP | GO:0000281 | mitotic cytokinesis                                                       | 52/7778  | 72/18670  | 1.41E-07 | 2.30E-06 | 1.40E-06 |
| BP | GO:0038034 | signal transduction in absence of ligand                                  | 52/7778  | 72/18670  | 1.41E-07 | 2.30E-06 | 1.40E-06 |
| BP | GO:0097192 | extrinsic apoptotic signaling pathway in absence of ligand                | 52/7778  | 72/18670  | 1.41E-07 | 2.30E-06 | 1.40E-06 |
| BP | GO:1903747 | regulation of establishment of protein localization to mitochondrion      | 52/7778  | 72/18670  | 1.41E-07 | 2.30E-06 | 1.40E-06 |
| BP | GO:0002478 | antigen processing and presentation of exogenous peptide antigen          | 107/7778 | 175/18670 | 1.45E-07 | 2.36E-06 | 1.44E-06 |
| BP | GO:0034340 | response to type I interferon                                             | 67/7778  | 99/18670  | 1.45E-07 | 2.36E-06 | 1.44E-06 |
| BP | GO:0031109 | microtubule polymerization or depolymerization                            | 74/7778  | 112/18670 | 1.51E-07 | 2.44E-06 | 1.49E-06 |
| BP | GO:0006757 | ATP generation from ADP                                                   | 75/7778  | 114/18670 | 1.62E-07 | 2.62E-06 | 1.60E-06 |
| BP | GO:0072395 | signal transduction involved in cell cycle checkpoint                     | 53/7778  | 74/18670  | 1.68E-07 | 2.71E-06 | 1.65E-06 |
| BP | GO:0006109 | regulation of carbohydrate metabolic process                              | 119/7778 | 199/18670 | 1.70E-07 | 2.73E-06 | 1.66E-06 |
| BP | GO:0002011 | morphogenesis of an epithelial sheet                                      | 42/7778  | 55/18670  | 1.71E-07 | 2.74E-06 | 1.67E-06 |
| BP | GO:0044380 | protein localization to cytoskeleton                                      | 42/7778  | 55/18670  | 1.71E-07 | 2.74E-06 | 1.67E-06 |
| BP | GO:0007569 | cell aging                                                                | 76/7778  | 116/18670 | 1.74E-07 | 2.78E-06 | 1.69E-06 |
| BP | GO:0008406 | gonad development                                                         | 128/7778 | 217/18670 | 1.77E-07 | 2.82E-06 | 1.72E-06 |
| BP | GO:0048145 | regulation of fibroblast proliferation                                    | 58/7778  | 83/18670  | 1.79E-07 | 2.85E-06 | 1.74E-06 |
| BP | GO:0021915 | neural tube development                                                   | 99/7778  | 160/18670 | 1.84E-07 | 2.93E-06 | 1.78E-06 |
| BP | GO:0010508 | positive regulation of autophagy                                          | 78/7778  | 120/18670 | 1.98E-07 | 3.14E-06 | 1.91E-06 |
| BP | GO:0008088 | axo-dendritic transport                                                   | 50/7778  | 69/18670  | 2.06E-07 | 3.25E-06 | 1.98E-06 |
| BP | GO:0097549 | chromatin organization involved in negative regulation of transcription   | 79/7778  | 122/18670 | 2.10E-07 | 3.31E-06 | 2.02E-06 |
| BP | GO:0001838 | embryonic epithelial tube formation                                       | 80/7778  | 124/18670 | 2.23E-07 | 3.49E-06 | 2.13E-06 |
| BP | GO:0072431 | signal transduction involved in mitotic G1 DNA damage checkpoint          | 43/7778  | 57/18670  | 2.23E-07 | 3.49E-06 | 2.13E-06 |
| BP | GO:1902400 | intracellular signal transduction involved in G1 DNA damage checkpoint    | 43/7778  | 57/18670  | 2.23E-07 | 3.49E-06 | 2.13E-06 |
| BP | GO:0098813 | nuclear chromosome segregation                                            | 150/7778 | 262/18670 | 2.24E-07 | 3.49E-06 | 2.13E-06 |
| BP | GO:0061614 | pri-miRNA transcription by RNA polymerase II                              | 37/7778  | 47/18670  | 2.38E-07 | 3.70E-06 | 2.25E-06 |
| BP | GO:0006301 | postreplication repair                                                    | 40/7778  | 52/18670  | 2.39E-07 | 3.70E-06 | 2.25E-06 |
| BP | GO:0045839 | negative regulation of mitotic nuclear division                           | 40/7778  | 52/18670  | 2.39E-07 | 3.70E-06 | 2.25E-06 |
| BP | GO:0051607 | defense response to virus                                                 | 138/7778 | 238/18670 | 2.46E-07 | 3.80E-06 | 2.31E-06 |
| BP | GO:0036498 | IRE1-mediated unfolded protein response                                   | 47/7778  | 64/18670  | 2.46E-07 | 3.80E-06 | 2.31E-06 |
| BP | GO:0001667 | ameboid-like cell migration                                               | 246/7778 | 462/18670 | 2.49E-07 | 3.82E-06 | 2.33E-06 |
| BP | GO:0009612 | response to mechanical stimulus                                           | 124/7778 | 210/18670 | 2.52E-07 | 3.87E-06 | 2.36E-06 |
| BP | GO:0006096 | glycolytic process                                                        | 74/7778  | 113/18670 | 2.59E-07 | 3.95E-06 | 2.40E-06 |
| BP | GO:0035821 | modulation of process of other organism                                   | 74/7778  | 113/18670 | 2.59E-07 | 3.95E-06 | 2.40E-06 |
| BP | GO:0033045 | regulation of sister chromatid segregation                                | 56/7778  | 80/18670  | 2.66E-07 | 4.05E-06 | 2.46E-06 |
| BP | GO:0072175 | epithelial tube formation                                                 | 84/7778  | 132/18670 | 2.72E-07 | 4.14E-06 | 2.52E-06 |
| BP | GO:0042769 | DNA damage response, detection of DNA damage                              | 32/7778  | 39/18670  | 2.74E-07 | 4.15E-06 | 2.53E-06 |
| BP | GO:0010976 | positive regulation of neuron projection development                      | 159/7778 | 281/18670 | 2.75E-07 | 4.16E-06 | 2.53E-06 |
| BP | GO:0009416 | response to light stimulus                                                | 175/7778 | 314/18670 | 2.87E-07 | 4.32E-06 | 2.63E-06 |
| BP | GO:0072401 | signal transduction involved in DNA integrity checkpoint                  | 52/7778  | 73/18670  | 2.91E-07 | 4.37E-06 | 2.66E-06 |
| BP | GO:0072422 | signal transduction involved in DNA damage checkpoint                     | 52/7778  | 73/18670  | 2.91E-07 | 4.37E-06 | 2.66E-06 |
| BP | GO:0140056 | organelle localization by membrane tethering                              | 103/7778 | 169/18670 | 3.07E-07 | 4.60E-06 | 2.80E-06 |
| BP | GO:0003205 | cardiac chamber development                                               | 104/7778 | 171/18670 | 3.13E-07 | 4.67E-06 | 2.85E-06 |
| BP | GO:0097345 | mitochondrial outer membrane permeabilization                             | 41/7778  | 54/18670  | 3.16E-07 | 4.72E-06 | 2.87E-06 |
| BP | GO:0000045 | autophagosome assembly                                                    | 63/7778  | 93/18670  | 3.22E-07 | 4.79E-06 | 2.92E-06 |
| BP | GO:0045841 | negative regulation of mitotic metaphase/anaphase transition              | 30/7778  | 36/18670  | 3.38E-07 | 5.02E-06 | 3.06E-06 |
| BP | GO:0050769 | positive regulation of neurogenesis                                       | 251/7778 | 474/18670 | 3.43E-07 | 5.07E-06 | 3.09E-06 |
| BP | GO:0070302 | regulation of stress-activated protein kinase signaling cascade           | 138/7778 | 239/18670 | 3.44E-07 | 5.07E-06 | 3.09E-06 |
| BP | GO:0048144 | fibroblast proliferation                                                  | 58/7778  | 84/18670  | 3.44E-07 | 5.07E-06 | 3.09E-06 |
| BP | GO:0031669 | cellular response to nutrient levels                                      | 137/7778 | 237/18670 | 3.46E-07 | 5.09E-06 | 3.10E-06 |
| BP | GO:0042594 | response to starvation                                                    | 114/7778 | 191/18670 | 3.51E-07 | 5.14E-06 | 3.13E-06 |
| BP | GO:0006413 | translational initiation                                                  | 115/7778 | 193/18670 | 3.53E-07 | 5.16E-06 | 3.14E-06 |
| BP | GO:0031146 | SCF-dependent proteasomal ubiquitin-dependent protein catabolic p         | 64/7778  | 95/18670  | 3.55E-07 | 5.16E-06 | 3.14E-06 |
| BP | GO:0060337 | type I interferon signaling pathway                                       | 64/7778  | 95/18670  | 3.55E-07 | 5.16E-06 | 3.14E-06 |
| BP | GO:0071357 | cellular response to type I interferon                                    | 64/7778  | 95/18670  | 3.55E-07 | 5.16E-06 | 3.14E-06 |
| BP | GO:0007568 | aging                                                                     | 178/7778 | 321/18670 | 3.60E-07 | 5.22E-06 | 3.18E-06 |
| BP | GO:0033047 | regulation of mitotic sister chromatid segregation                        | 49/7778  | 68/18670  | 3.62E-07 | 5.23E-06 | 3.18E-06 |
| BP | GO:0070555 | response to interleukin-1                                                 | 122/7778 | 207/18670 | 3.62E-07 | 5.23E-06 | 3.18E-06 |
| BP | GO:0016331 | morphogenesis of embryonic epithelium                                     | 93/7778  | 150/18670 | 3.76E-07 | 5.40E-06 | 3.29E-06 |
| BP | GO:0035567 | non-canonical Wnt signaling pathway                                       | 93/7778  | 150/18670 | 3.76E-07 | 5.40E-06 | 3.29E-06 |
| BP | GO:0008625 | extrinsic apoptotic signaling pathway via death domain receptors          | 59/7778  | 86/18670  | 3.87E-07 | 5.56E-06 | 3.38E-06 |
| BP | GO:0014020 | primary neural tube formation                                             | 65/7778  | 97/18670  | 3.89E-07 | 5.56E-06 | 3.38E-06 |
| BP | GO:2001022 | positive regulation of response to DNA damage stimulus                    | 65/7778  | 97/18670  | 3.89E-07 | 5.56E-06 | 3.38E-06 |
| BP | GO:0006110 | regulation of glycolytic process                                          | 54/7778  | 77/18670  | 3.94E-07 | 5.61E-06 | 3.42E-06 |
| BP | GO:0043414 | macromolecule methylation                                                 | 172/7778 | 309/18670 | 4.03E-07 | 5.73E-06 | 3.49E-06 |
| BP | GO:0006977 | DNA damage response, signal transduction by p53 class mediator re         | 42/7778  | 56/18670  | 4.08E-07 | 5.79E-06 | 3.53E-06 |
| BP | GO:1903828 | negative regulation of cellular protein localization                      | 73/7778  | 112/18670 | 4.11E-07 | 5.82E-06 | 3.54E-06 |
| BP | GO:0009150 | purine ribonucleotide metabolic process                                   | 215/7778 | 399/18670 | 4.43E-07 | 6.27E-06 | 3.81E-06 |
| BP | GO:0043484 | regulation of RNA splicing                                                | 85/7778  | 135/18670 | 4.55E-07 | 6.42E-06 | 3.91E-06 |

|    |            |                                                                          |          |           |          |          |          |
|----|------------|--------------------------------------------------------------------------|----------|-----------|----------|----------|----------|
| BP | GO:0065004 | protein-DNA complex assembly                                             | 142/7778 | 248/18670 | 4.61E-07 | 6.49E-06 | 3.95E-06 |
| BP | GO:0007178 | transmembrane receptor protein serine/threonine kinase signaling pathway | 191/7778 | 349/18670 | 4.73E-07 | 6.64E-06 | 4.04E-06 |
| BP | GO:0001843 | neural tube closure                                                      | 61/7778  | 90/18670  | 4.80E-07 | 6.72E-06 | 4.09E-06 |
| BP | GO:0019884 | antigen processing and presentation of exogenous antigen                 | 109/7778 | 182/18670 | 4.94E-07 | 6.91E-06 | 4.21E-06 |
| BP | GO:0019882 | antigen processing and presentation                                      | 131/7778 | 226/18670 | 5.03E-07 | 7.01E-06 | 4.27E-06 |
| BP | GO:0001738 | morphogenesis of a polarized epithelium                                  | 88/7778  | 141/18670 | 5.05E-07 | 7.03E-06 | 4.28E-06 |
| BP | GO:0051701 | interaction with host                                                    | 119/7778 | 202/18670 | 5.18E-07 | 7.19E-06 | 4.38E-06 |
| BP | GO:0034248 | regulation of cellular amide metabolic process                           | 251/7778 | 476/18670 | 5.36E-07 | 7.43E-06 | 4.52E-06 |
| BP | GO:0034101 | erythrocyte homeostasis                                                  | 78/7778  | 122/18670 | 5.44E-07 | 7.50E-06 | 4.57E-06 |
| BP | GO:0046031 | ADP metabolic process                                                    | 78/7778  | 122/18670 | 5.44E-07 | 7.50E-06 | 4.57E-06 |
| BP | GO:0050773 | regulation of dendrite development                                       | 92/7778  | 149/18670 | 5.66E-07 | 7.76E-06 | 4.73E-06 |
| BP | GO:1903900 | regulation of viral life cycle                                           | 92/7778  | 149/18670 | 5.66E-07 | 7.76E-06 | 4.73E-06 |
| BP | GO:0002831 | regulation of response to biotic stimulus                                | 215/7778 | 400/18670 | 5.66E-07 | 7.76E-06 | 4.73E-06 |
| BP | GO:0001736 | establishment of planar polarity                                         | 79/7778  | 124/18670 | 5.70E-07 | 7.78E-06 | 4.74E-06 |
| BP | GO:0007164 | establishment of tissue polarity                                         | 79/7778  | 124/18670 | 5.70E-07 | 7.78E-06 | 4.74E-06 |
| BP | GO:0045666 | positive regulation of neuron differentiation                            | 201/7778 | 371/18670 | 6.28E-07 | 8.55E-06 | 5.21E-06 |
| BP | GO:1905037 | autophagosome organization                                               | 64/7778  | 96/18670  | 6.33E-07 | 8.60E-06 | 5.23E-06 |
| BP | GO:0051784 | negative regulation of nuclear division                                  | 44/7778  | 60/18670  | 6.38E-07 | 8.65E-06 | 5.26E-06 |
| BP | GO:0048568 | embryonic organ development                                              | 228/7778 | 428/18670 | 6.46E-07 | 8.75E-06 | 5.32E-06 |
| BP | GO:0032872 | regulation of stress-activated MAPK cascade                              | 136/7778 | 237/18670 | 6.75E-07 | 9.12E-06 | 5.55E-06 |
| BP | GO:0045070 | positive regulation of viral genome replication                          | 29/7778  | 35/18670  | 6.81E-07 | 9.16E-06 | 5.58E-06 |
| BP | GO:1901030 | positive regulation of mitochondrial outer membrane permeabilization     | 29/7778  | 35/18670  | 6.81E-07 | 9.16E-06 | 5.58E-06 |
| BP | GO:0006626 | protein targeting to mitochondrion                                       | 65/7778  | 98/18670  | 6.86E-07 | 9.21E-06 | 5.61E-06 |
| BP | GO:0071347 | cellular response to interleukin-1                                       | 107/7778 | 179/18670 | 7.14E-07 | 9.57E-06 | 5.82E-06 |
| BP | GO:0010810 | regulation of cell-substrate adhesion                                    | 125/7778 | 215/18670 | 7.28E-07 | 9.73E-06 | 5.93E-06 |
| BP | GO:0071229 | cellular response to acid chemical                                       | 122/7778 | 209/18670 | 7.36E-07 | 9.82E-06 | 5.98E-06 |
| BP | GO:0042306 | regulation of protein import into nucleus                                | 41/7778  | 55/18670  | 7.41E-07 | 9.87E-06 | 6.01E-06 |
| BP | GO:0051865 | protein autoubiquitination                                               | 49/7778  | 69/18670  | 7.43E-07 | 9.87E-06 | 6.01E-06 |
| BP | GO:0050678 | regulation of epithelial cell proliferation                              | 204/7778 | 378/18670 | 7.49E-07 | 9.93E-06 | 6.04E-06 |
| BP | GO:0007030 | Golgi organization                                                       | 88/7778  | 142/18670 | 7.87E-07 | 1.04E-05 | 6.34E-06 |
| BP | GO:0071786 | endoplasmic reticulum tubular network organization                       | 16/7778  | 16/18670  | 8.16E-07 | 1.08E-05 | 6.56E-06 |
| BP | GO:0014065 | phosphatidylinositol 3-kinase signaling                                  | 91/7778  | 148/18670 | 8.48E-07 | 1.12E-05 | 6.80E-06 |
| BP | GO:0042771 | intrinsic apoptotic signaling pathway in response to DNA damage by       | 35/7778  | 45/18670  | 8.60E-07 | 1.13E-05 | 6.88E-06 |
| BP | GO:0060606 | tube closure                                                             | 61/7778  | 91/18670  | 8.65E-07 | 1.13E-05 | 6.91E-06 |
| BP | GO:0097150 | neuronal stem cell population maintenance                                | 21/7778  | 23/18670  | 9.36E-07 | 1.22E-05 | 7.45E-06 |
| BP | GO:2000637 | positive regulation of gene silencing by miRNA                           | 21/7778  | 23/18670  | 9.36E-07 | 1.22E-05 | 7.45E-06 |
| BP | GO:0046661 | male sex differentiation                                                 | 97/7778  | 160/18670 | 9.48E-07 | 1.24E-05 | 7.53E-06 |
| BP | GO:0000302 | response to reactive oxygen species                                      | 133/7778 | 232/18670 | 9.60E-07 | 1.25E-05 | 7.61E-06 |
| BP | GO:0071156 | regulation of cell cycle arrest                                          | 70/7778  | 108/18670 | 9.67E-07 | 1.25E-05 | 7.63E-06 |
| BP | GO:2000278 | regulation of DNA biosynthetic process                                   | 70/7778  | 108/18670 | 9.67E-07 | 1.25E-05 | 7.63E-06 |
| BP | GO:0007254 | JNK cascade                                                              | 124/7778 | 214/18670 | 1.03E-06 | 1.33E-05 | 8.10E-06 |
| BP | GO:1905330 | regulation of morphogenesis of an epithelium                             | 107/7778 | 180/18670 | 1.04E-06 | 1.35E-05 | 8.20E-06 |
| BP | GO:1902100 | negative regulation of metaphase/anaphase transition of cell cycle       | 30/7778  | 37/18670  | 1.07E-06 | 1.38E-05 | 8.37E-06 |
| BP | GO:1904358 | positive regulation of telomere maintenance via telomere lengthening     | 30/7778  | 37/18670  | 1.07E-06 | 1.38E-05 | 8.37E-06 |
| BP | GO:2000142 | regulation of DNA-templated transcription, initiation                    | 30/7778  | 37/18670  | 1.07E-06 | 1.38E-05 | 8.37E-06 |
| BP | GO:0006353 | DNA-templated transcription, termination                                 | 52/7778  | 75/18670  | 1.13E-06 | 1.44E-05 | 8.76E-06 |
| BP | GO:0033143 | regulation of intracellular steroid hormone receptor signaling pathway   | 52/7778  | 75/18670  | 1.13E-06 | 1.44E-05 | 8.76E-06 |
| BP | GO:0072413 | signal transduction involved in mitotic cell cycle checkpoint            | 43/7778  | 59/18670  | 1.13E-06 | 1.44E-05 | 8.76E-06 |
| BP | GO:1902402 | signal transduction involved in mitotic DNA damage checkpoint            | 43/7778  | 59/18670  | 1.13E-06 | 1.44E-05 | 8.76E-06 |
| BP | GO:1902403 | signal transduction involved in mitotic DNA integrity checkpoint         | 43/7778  | 59/18670  | 1.13E-06 | 1.44E-05 | 8.76E-06 |
| BP | GO:0030218 | erythrocyte differentiation                                              | 73/7778  | 114/18670 | 1.14E-06 | 1.44E-05 | 8.78E-06 |
| BP | GO:0070849 | response to epidermal growth factor                                      | 36/7778  | 47/18670  | 1.16E-06 | 1.47E-05 | 8.93E-06 |
| BP | GO:0033048 | negative regulation of mitotic sister chromatid segregation              | 33/7778  | 42/18670  | 1.18E-06 | 1.49E-05 | 9.05E-06 |
| BP | GO:0008286 | insulin receptor signaling pathway                                       | 87/7778  | 141/18670 | 1.19E-06 | 1.49E-05 | 9.10E-06 |
| BP | GO:0007094 | mitotic spindle assembly checkpoint                                      | 28/7778  | 34/18670  | 1.36E-06 | 1.71E-05 | 1.04E-05 |
| BP | GO:0031577 | spindle checkpoint                                                       | 28/7778  | 34/18670  | 1.36E-06 | 1.71E-05 | 1.04E-05 |
| BP | GO:0071173 | spindle assembly checkpoint                                              | 28/7778  | 34/18670  | 1.36E-06 | 1.71E-05 | 1.04E-05 |
| BP | GO:0071174 | mitotic spindle checkpoint                                               | 28/7778  | 34/18670  | 1.36E-06 | 1.71E-05 | 1.04E-05 |
| BP | GO:0007160 | cell-matrix adhesion                                                     | 129/7778 | 225/18670 | 1.38E-06 | 1.72E-05 | 1.05E-05 |
| BP | GO:0071260 | cellular response to mechanical stimulus                                 | 54/7778  | 79/18670  | 1.43E-06 | 1.78E-05 | 1.09E-05 |
| BP | GO:0034341 | response to interferon-gamma                                             | 116/7778 | 199/18670 | 1.50E-06 | 1.86E-05 | 1.13E-05 |
| BP | GO:0048736 | appendage development                                                    | 106/7778 | 179/18670 | 1.51E-06 | 1.86E-05 | 1.13E-05 |
| BP | GO:0060173 | limb development                                                         | 106/7778 | 179/18670 | 1.51E-06 | 1.86E-05 | 1.13E-05 |
| BP | GO:0002221 | pattern recognition receptor signaling pathway                           | 115/7778 | 197/18670 | 1.51E-06 | 1.86E-05 | 1.13E-05 |
| BP | GO:0048015 | phosphatidylinositol-mediated signaling                                  | 107/7778 | 181/18670 | 1.51E-06 | 1.86E-05 | 1.13E-05 |
| BP | GO:0050770 | regulation of axonogenesis                                               | 108/7778 | 183/18670 | 1.51E-06 | 1.86E-05 | 1.13E-05 |
| BP | GO:0061912 | selective autophagy                                                      | 37/7778  | 49/18670  | 1.52E-06 | 1.86E-05 | 1.13E-05 |
| BP | GO:0048002 | antigen processing and presentation of peptide antigen                   | 111/7778 | 189/18670 | 1.52E-06 | 1.86E-05 | 1.13E-05 |
| BP | GO:1902229 | regulation of intrinsic apoptotic signaling pathway in response to DN    | 31/7778  | 39/18670  | 1.59E-06 | 1.94E-05 | 1.18E-05 |
| BP | GO:0032204 | regulation of telomere maintenance                                       | 55/7778  | 81/18670  | 1.59E-06 | 1.95E-05 | 1.18E-05 |
| BP | GO:0006165 | nucleoside diphosphate phosphorylation                                   | 82/7778  | 132/18670 | 1.61E-06 | 1.95E-05 | 1.19E-05 |
| BP | GO:0042177 | negative regulation of protein catabolic process                         | 82/7778  | 132/18670 | 1.61E-06 | 1.95E-05 | 1.19E-05 |
| BP | GO:0006163 | purine nucleotide metabolic process                                      | 228/7778 | 432/18670 | 1.61E-06 | 1.95E-05 | 1.19E-05 |
| BP | GO:0033046 | negative regulation of sister chromatid segregation                      | 34/7778  | 44/18670  | 1.62E-06 | 1.96E-05 | 1.19E-05 |
| BP | GO:1901028 | regulation of mitochondrial outer membrane permeabilization involve      | 34/7778  | 44/18670  | 1.62E-06 | 1.96E-05 | 1.19E-05 |
| BP | GO:0000724 | double-strand break repair via homologous recombination                  | 83/7778  | 134/18670 | 1.65E-06 | 1.99E-05 | 1.21E-05 |
| BP | GO:0009135 | purine nucleoside diphosphate metabolic process                          | 83/7778  | 134/18670 | 1.65E-06 | 1.99E-05 | 1.21E-05 |
| BP | GO:0009179 | purine ribonucleoside diphosphate metabolic process                      | 83/7778  | 134/18670 | 1.65E-06 | 1.99E-05 | 1.21E-05 |
| BP | GO:0090307 | mitotic spindle assembly                                                 | 41/7778  | 56/18670  | 1.65E-06 | 1.99E-05 | 1.21E-05 |
| BP | GO:1902230 | negative regulation of intrinsic apoptotic signaling pathway in respon   | 26/7778  | 31/18670  | 1.68E-06 | 2.01E-05 | 1.22E-05 |
| BP | GO:1902036 | regulation of hematopoietic stem cell differentiation                    | 50/7778  | 72/18670  | 1.68E-06 | 2.02E-05 | 1.23E-05 |
| BP | GO:0009185 | ribonucleoside diphosphate metabolic process                             | 84/7778  | 136/18670 | 1.69E-06 | 2.03E-05 | 1.23E-05 |
| BP | GO:0060485 | mesenchyme development                                                   | 155/7778 | 279/18670 | 1.72E-06 | 2.05E-05 | 1.25E-05 |
| BP | GO:0034329 | cell junction assembly                                                   | 217/7778 | 409/18670 | 1.75E-06 | 2.08E-05 | 1.26E-05 |
| BP | GO:0030217 | T cell differentiation                                                   | 136/7778 | 240/18670 | 1.75E-06 | 2.08E-05 | 1.26E-05 |
| BP | GO:0060218 | hematopoietic stem cell differentiation                                  | 56/7778  | 83/18670  | 1.76E-06 | 2.08E-05 | 1.27E-05 |
| BP | GO:1900542 | regulation of purine nucleotide metabolic process                        | 73/7778  | 115/18670 | 1.85E-06 | 2.19E-05 | 1.33E-05 |
| BP | GO:0002224 | tol-like receptor signaling pathway                                      | 89/7778  | 146/18670 | 1.88E-06 | 2.23E-05 | 1.36E-05 |
| BP | GO:0072665 | protein localization to vacuole                                          | 46/7778  | 65/18670  | 1.89E-06 | 2.24E-05 | 1.36E-05 |
| BP | GO:0072384 | organelle transport along microtubule                                    | 57/7778  | 85/18670  | 1.93E-06 | 2.26E-05 | 1.38E-05 |
| BP | GO:0006342 | chromatin silencing                                                      | 38/7778  | 51/18670  | 1.93E-06 | 2.26E-05 | 1.38E-05 |
| BP | GO:0030071 | regulation of mitotic metaphase/anaphase transition                      | 38/7778  | 51/18670  | 1.93E-06 | 2.26E-05 | 1.38E-05 |

|    |            |                                                                        |          |           |          |          |          |
|----|------------|------------------------------------------------------------------------|----------|-----------|----------|----------|----------|
| BP | GO:0032206 | positive regulation of telomere maintenance                            | 38/7778  | 51/18670  | 1.93E-06 | 2.26E-05 | 1.38E-05 |
| BP | GO:0048754 | branching morphogenesis of an epithelial tube                          | 91/7778  | 150/18670 | 1.95E-06 | 2.28E-05 | 1.39E-05 |
| BP | GO:1904589 | regulation of protein import                                           | 42/7778  | 58/18670  | 2.00E-06 | 2.34E-05 | 1.42E-05 |
| BP | GO:0001952 | regulation of cell-matrix adhesion                                     | 75/7778  | 119/18670 | 2.01E-06 | 2.34E-05 | 1.42E-05 |
| BP | GO:0003007 | heart morphogenesis                                                    | 145/7778 | 259/18670 | 2.06E-06 | 2.39E-05 | 1.46E-05 |
| BP | GO:0051056 | regulation of small GTPase mediated signal transduction                | 183/7778 | 338/18670 | 2.07E-06 | 2.41E-05 | 1.47E-05 |
| BP | GO:1902806 | regulation of cell cycle G1/S phase transition                         | 117/7778 | 202/18670 | 2.11E-06 | 2.44E-05 | 1.49E-05 |
| BP | GO:0016052 | carbohydrate catabolic process                                         | 115/7778 | 198/18670 | 2.13E-06 | 2.46E-05 | 1.50E-05 |
| BP | GO:0006900 | vesicle budding from membrane                                          | 66/7778  | 102/18670 | 2.14E-06 | 2.47E-05 | 1.50E-05 |
| BP | GO:0006984 | ER-nucleus signaling pathway                                           | 35/7778  | 46/18670  | 2.15E-06 | 2.48E-05 | 1.51E-05 |
| BP | GO:0090090 | negative regulation of canonical Wnt signaling pathway                 | 105/7778 | 178/18670 | 2.17E-06 | 2.49E-05 | 1.51E-05 |
| BP | GO:0048017 | inositol lipid-mediated signaling                                      | 108/7778 | 184/18670 | 2.17E-06 | 2.49E-05 | 1.51E-05 |
| BP | GO:2000045 | regulation of G1/S transition of mitotic cell cycle                    | 108/7778 | 184/18670 | 2.17E-06 | 2.49E-05 | 1.51E-05 |
| BP | GO:0045926 | negative regulation of growth                                          | 140/7778 | 249/18670 | 2.23E-06 | 2.55E-05 | 1.55E-05 |
| BP | GO:1902903 | regulation of supramolecular fiber organization                        | 190/7778 | 353/18670 | 2.23E-06 | 2.55E-05 | 1.55E-05 |
| BP | GO:1902893 | regulation of pri-miRNA transcription by RNA polymerase II             | 32/7778  | 41/18670  | 2.24E-06 | 2.55E-05 | 1.55E-05 |
| BP | GO:0071887 | leukocyte apoptotic process                                            | 67/7778  | 104/18670 | 2.26E-06 | 2.57E-05 | 1.57E-05 |
| BP | GO:0060021 | roof of mouth development                                              | 59/7778  | 89/18670  | 2.28E-06 | 2.59E-05 | 1.58E-05 |
| BP | GO:0007041 | lysosomal transport                                                    | 68/7778  | 106/18670 | 2.38E-06 | 2.68E-05 | 1.63E-05 |
| BP | GO:1901989 | positive regulation of cell cycle phase transition                     | 68/7778  | 106/18670 | 2.38E-06 | 2.68E-05 | 1.63E-05 |
| BP | GO:0043966 | histone H3 acetylation                                                 | 43/7778  | 60/18670  | 2.39E-06 | 2.68E-05 | 1.63E-05 |
| BP | GO:0051893 | regulation of focal adhesion assembly                                  | 43/7778  | 60/18670  | 2.39E-06 | 2.68E-05 | 1.63E-05 |
| BP | GO:0090109 | regulation of cell-substrate junction assembly                         | 43/7778  | 60/18670  | 2.39E-06 | 2.68E-05 | 1.63E-05 |
| BP | GO:0150116 | regulation of cell-substrate junction organization                     | 43/7778  | 60/18670  | 2.39E-06 | 2.68E-05 | 1.63E-05 |
| BP | GO:0022613 | ribonucleoprotein complex biogenesis                                   | 244/7778 | 468/18670 | 2.39E-06 | 2.68E-05 | 1.63E-05 |
| BP | GO:0051402 | neuron apoptotic process                                               | 135/7778 | 239/18670 | 2.41E-06 | 2.69E-05 | 1.64E-05 |
| BP | GO:0048638 | regulation of developmental growth                                     | 187/7778 | 347/18670 | 2.41E-06 | 2.70E-05 | 1.64E-05 |
| BP | GO:0043122 | regulation of I-kappaB kinase/NF-kappaB signaling                      | 134/7778 | 237/18670 | 2.44E-06 | 2.72E-05 | 1.66E-05 |
| BP | GO:0000725 | recombinational repair                                                 | 83/7778  | 135/18670 | 2.54E-06 | 2.83E-05 | 1.73E-05 |
| BP | GO:0090175 | regulation of establishment of planar polarity                         | 70/7778  | 110/18670 | 2.62E-06 | 2.92E-05 | 1.78E-05 |
| BP | GO:0032092 | positive regulation of protein binding                                 | 61/7778  | 93/18670  | 2.64E-06 | 2.93E-05 | 1.78E-05 |
| BP | GO:0046546 | development of primary male sexual characteristics                     | 85/7778  | 139/18670 | 2.65E-06 | 2.94E-05 | 1.79E-05 |
| BP | GO:0001837 | epithelial to mesenchymal transition                                   | 86/7778  | 141/18670 | 2.70E-06 | 2.99E-05 | 1.82E-05 |
| BP | GO:1901797 | negative regulation of signal transduction by p53 class mediator       | 27/7778  | 33/18670  | 2.72E-06 | 3.00E-05 | 1.83E-05 |
| BP | GO:0043406 | positive regulation of MAP kinase activity                             | 144/7778 | 258/18670 | 2.80E-06 | 3.09E-05 | 1.88E-05 |
| BP | GO:1902686 | mitochondrial outer membrane permeabilization involved in program      | 44/7778  | 62/18670  | 2.80E-06 | 3.09E-05 | 1.88E-05 |
| BP | GO:0071236 | cellular response to antibiotic                                        | 89/7778  | 147/18670 | 2.83E-06 | 3.11E-05 | 1.90E-05 |
| BP | GO:0010833 | telomere maintenance via telomere lengthening                          | 55/7778  | 82/18670  | 2.88E-06 | 3.15E-05 | 1.92E-05 |
| BP | GO:0071158 | positive regulation of cell cycle arrest                               | 55/7778  | 82/18670  | 2.88E-06 | 3.15E-05 | 1.92E-05 |
| BP | GO:0071364 | cellular response to epidermal growth factor stimulus                  | 33/7778  | 43/18670  | 3.03E-06 | 3.31E-05 | 2.02E-05 |
| BP | GO:0046825 | regulation of protein export from nucleus                              | 30/7778  | 38/18670  | 3.05E-06 | 3.33E-05 | 2.03E-05 |
| BP | GO:1905898 | positive regulation of response to endoplasmic reticulum stress        | 30/7778  | 38/18670  | 3.05E-06 | 3.33E-05 | 2.03E-05 |
| BP | GO:0006479 | protein methylation                                                    | 105/7778 | 179/18670 | 3.11E-06 | 3.37E-05 | 2.05E-05 |
| BP | GO:0008213 | protein alkylation                                                     | 105/7778 | 179/18670 | 3.11E-06 | 3.37E-05 | 2.05E-05 |
| BP | GO:0035690 | cellular response to drug                                              | 227/7778 | 433/18670 | 3.19E-06 | 3.46E-05 | 2.11E-05 |
| BP | GO:0035794 | positive regulation of mitochondrial membrane permeability             | 45/7778  | 64/18670  | 3.25E-06 | 3.52E-05 | 2.14E-05 |
| BP | GO:1905477 | positive regulation of protein localization to membrane                | 76/7778  | 122/18670 | 3.28E-06 | 3.54E-05 | 2.16E-05 |
| BP | GO:0007098 | centrosome cycle                                                       | 77/7778  | 124/18670 | 3.37E-06 | 3.63E-05 | 2.21E-05 |
| BP | GO:0048284 | organelle fusion                                                       | 77/7778  | 124/18670 | 3.37E-06 | 3.63E-05 | 2.21E-05 |
| BP | GO:0051101 | regulation of DNA binding                                              | 77/7778  | 124/18670 | 3.37E-06 | 3.63E-05 | 2.21E-05 |
| BP | GO:0001844 | protein insertion into mitochondrial membrane involved in apoptotic    | 25/7778  | 30/18670  | 3.40E-06 | 3.65E-05 | 2.22E-05 |
| BP | GO:0072698 | protein localization to microtubule cytoskeleton                       | 37/7778  | 50/18670  | 3.49E-06 | 3.74E-05 | 2.28E-05 |
| BP | GO:0060760 | positive regulation of response to cytokine stimulus                   | 41/7778  | 57/18670  | 3.52E-06 | 3.76E-05 | 2.29E-05 |
| BP | GO:0003281 | ventricular septum development                                         | 51/7778  | 75/18670  | 3.55E-06 | 3.79E-05 | 2.31E-05 |
| BP | GO:0009791 | post-embryonic development                                             | 58/7778  | 88/18670  | 3.67E-06 | 3.91E-05 | 2.38E-05 |
| BP | GO:0045995 | regulation of embryonic development                                    | 81/7778  | 132/18670 | 3.72E-06 | 3.96E-05 | 2.41E-05 |
| BP | GO:0048762 | mesenchymal cell differentiation                                       | 125/7778 | 220/18670 | 3.74E-06 | 3.98E-05 | 2.42E-05 |
| BP | GO:0007006 | mitochondrial membrane organization                                    | 82/7778  | 134/18670 | 3.80E-06 | 4.03E-05 | 2.45E-05 |
| BP | GO:0046939 | nucleotide phosphorylation                                             | 82/7778  | 134/18670 | 3.80E-06 | 4.03E-05 | 2.45E-05 |
| BP | GO:0032481 | positive regulation of type I interferon production                    | 52/7778  | 77/18670  | 3.92E-06 | 4.14E-05 | 2.52E-05 |
| BP | GO:0008584 | male gonad development                                                 | 84/7778  | 138/18670 | 3.94E-06 | 4.16E-05 | 2.53E-05 |
| BP | GO:0030178 | negative regulation of Wnt signaling pathway                           | 120/7778 | 210/18670 | 3.97E-06 | 4.17E-05 | 2.54E-05 |
| BP | GO:0051985 | negative regulation of chromosome segregation                          | 34/7778  | 45/18670  | 3.97E-06 | 4.17E-05 | 2.54E-05 |
| BP | GO:0072073 | kidney epithelium development                                          | 85/7778  | 140/18670 | 4.00E-06 | 4.21E-05 | 2.56E-05 |
| BP | GO:0050679 | positive regulation of epithelial cell proliferation                   | 118/7778 | 206/18670 | 4.05E-06 | 4.25E-05 | 2.59E-05 |
| BP | GO:0006006 | glucose metabolic process                                              | 117/7778 | 204/18670 | 4.09E-06 | 4.28E-05 | 2.61E-05 |
| BP | GO:0060541 | respiratory system development                                         | 114/7778 | 198/18670 | 4.19E-06 | 4.39E-05 | 2.67E-05 |
| BP | GO:0006623 | protein targeting to vacuole                                           | 31/7778  | 40/18670  | 4.23E-06 | 4.42E-05 | 2.69E-05 |
| BP | GO:1901888 | regulation of cell junction assembly                                   | 111/7778 | 192/18670 | 4.29E-06 | 4.46E-05 | 2.71E-05 |
| BP | GO:0006998 | nuclear envelope organization                                          | 38/7778  | 52/18670  | 4.29E-06 | 4.46E-05 | 2.71E-05 |
| BP | GO:0051438 | regulation of ubiquitin-protein transferase activity                   | 38/7778  | 52/18670  | 4.29E-06 | 4.46E-05 | 2.71E-05 |
| BP | GO:0030308 | negative regulation of cell growth                                     | 108/7778 | 186/18670 | 4.36E-06 | 4.53E-05 | 2.76E-05 |
| BP | GO:0031667 | response to nutrient levels                                            | 257/7778 | 499/18670 | 4.44E-06 | 4.59E-05 | 2.79E-05 |
| BP | GO:0034614 | cellular response to reactive oxygen species                           | 99/7778  | 168/18670 | 4.45E-06 | 4.59E-05 | 2.79E-05 |
| BP | GO:0051302 | regulation of cell division                                            | 99/7778  | 168/18670 | 4.45E-06 | 4.59E-05 | 2.79E-05 |
| BP | GO:0033962 | cytoplasmic mRNA processing body assembly                              | 19/7778  | 21/18670  | 4.52E-06 | 4.66E-05 | 2.83E-05 |
| BP | GO:0060148 | positive regulation of posttranscriptional gene silencing              | 21/7778  | 24/18670  | 4.52E-06 | 4.66E-05 | 2.83E-05 |
| BP | GO:0060249 | anatomical structure homeostasis                                       | 229/7778 | 439/18670 | 4.60E-06 | 4.73E-05 | 2.88E-05 |
| BP | GO:0006140 | regulation of nucleotide metabolic process                             | 73/7778  | 117/18670 | 4.68E-06 | 4.77E-05 | 2.91E-05 |
| BP | GO:0031145 | anaphase-promoting complex-dependent catabolic process                 | 54/7778  | 81/18670  | 4.68E-06 | 4.77E-05 | 2.91E-05 |
| BP | GO:0032436 | positive regulation of proteasomal ubiquitin-dependent protein catabol | 54/7778  | 81/18670  | 4.68E-06 | 4.77E-05 | 2.91E-05 |
| BP | GO:0048041 | focal adhesion assembly                                                | 54/7778  | 81/18670  | 4.68E-06 | 4.77E-05 | 2.91E-05 |
| BP | GO:0110110 | positive regulation of animal organ morphogenesis                      | 54/7778  | 81/18670  | 4.68E-06 | 4.77E-05 | 2.91E-05 |
| BP | GO:0006999 | nuclear pore organization                                              | 14/7778  | 14/18670  | 4.71E-06 | 4.79E-05 | 2.92E-05 |
| BP | GO:0002474 | antigen processing and presentation of peptide antigen via MHC class   | 62/7778  | 96/18670  | 4.73E-06 | 4.81E-05 | 2.93E-05 |
| BP | GO:0043547 | positive regulation of GTPase activity                                 | 213/7778 | 405/18670 | 4.78E-06 | 4.85E-05 | 2.95E-05 |
| BP | GO:0090151 | establishment of protein localization to mitochondrial membrane        | 35/7778  | 47/18670  | 5.04E-06 | 5.11E-05 | 3.11E-05 |
| BP | GO:0009952 | anterior/posterior pattern specification                               | 124/7778 | 219/18670 | 5.17E-06 | 5.22E-05 | 3.18E-05 |
| BP | GO:0007091 | metaphase/anaphase transition of mitotic cell cycle                    | 39/7778  | 54/18670  | 5.17E-06 | 5.22E-05 | 3.18E-05 |
| BP | GO:0000375 | RNA splicing, via transesterification reactions                        | 202/7778 | 382/18670 | 5.23E-06 | 5.28E-05 | 3.21E-05 |
| BP | GO:0034446 | substrate adhesion-dependent cell spreading                            | 64/7778  | 100/18670 | 5.25E-06 | 5.29E-05 | 3.22E-05 |
| BP | GO:0090114 | COPII-coated vesicle budding                                           | 49/7778  | 72/18670  | 5.30E-06 | 5.32E-05 | 3.24E-05 |

|    |            |                                                                                  |          |           |          |           |          |
|----|------------|----------------------------------------------------------------------------------|----------|-----------|----------|-----------|----------|
| BP | GO:0008608 | attachment of spindle microtubules to kinetochore                                | 26/7778  | 32/18670  | 5.38E-06 | 5.39E-05  | 3.28E-05 |
| BP | GO:1901976 | regulation of cell cycle checkpoint                                              | 26/7778  | 32/18670  | 5.38E-06 | 5.39E-05  | 3.28E-05 |
| BP | GO:0050772 | positive regulation of axonogenesis                                              | 56/7778  | 85/18670  | 5.47E-06 | 5.47E-05  | 3.33E-05 |
| BP | GO:0031023 | microtubule organizing center organization                                       | 81/7778  | 133/18670 | 5.65E-06 | 5.64E-05  | 3.44E-05 |
| BP | GO:0060537 | muscle tissue development                                                        | 214/7778 | 408/18670 | 5.77E-06 | 5.76E-05  | 3.50E-05 |
| BP | GO:0000289 | nuclear-transcribed mRNA poly(A) tail shortening                                 | 29/7778  | 37/18670  | 5.84E-06 | 5.81E-05  | 3.54E-05 |
| BP | GO:0048199 | vesicle targeting, to, from or within Golgi                                      | 50/7778  | 74/18670  | 5.85E-06 | 5.82E-05  | 3.54E-05 |
| BP | GO:0001892 | embryonic placenta development                                                   | 57/7778  | 87/18670  | 5.87E-06 | 5.82E-05  | 3.55E-05 |
| BP | GO:0035304 | regulation of protein dephosphorylation                                          | 84/7778  | 139/18670 | 5.91E-06 | 5.85E-05  | 3.56E-05 |
| BP | GO:0072521 | purine-containing compound metabolic process                                     | 240/7778 | 464/18670 | 6.12E-06 | 6.06E-05  | 3.69E-05 |
| BP | GO:0010332 | response to gamma radiation                                                      | 40/7778  | 56/18670  | 6.13E-06 | 6.06E-05  | 3.69E-05 |
| BP | GO:0060071 | Wnt signaling pathway, planar cell polarity pathway                              | 68/7778  | 108/18670 | 6.23E-06 | 6.15E-05  | 3.74E-05 |
| BP | GO:0071349 | cellular response to interleukin-12                                              | 36/7778  | 49/18670  | 6.26E-06 | 6.16E-05  | 3.75E-05 |
| BP | GO:0097306 | cellular response to alcohol                                                     | 58/7778  | 89/18670  | 6.26E-06 | 6.16E-05  | 3.75E-05 |
| BP | GO:0007029 | endoplasmic reticulum organization                                               | 45/7778  | 65/18670  | 6.31E-06 | 6.18E-05  | 3.76E-05 |
| BP | GO:0045739 | positive regulation of DNA repair                                                | 45/7778  | 65/18670  | 6.31E-06 | 6.18E-05  | 3.76E-05 |
| BP | GO:0010921 | regulation of phosphatase activity                                               | 102/7778 | 175/18670 | 6.31E-06 | 6.18E-05  | 3.76E-05 |
| BP | GO:0042752 | regulation of circadian rhythm                                                   | 71/7778  | 114/18670 | 6.89E-06 | 6.74E-05  | 4.10E-05 |
| BP | GO:0000377 | RNA splicing, via transesterification reactions with bulged adenosine            | 200/7778 | 379/18670 | 6.93E-06 | 6.75E-05  | 4.11E-05 |
| BP | GO:0000398 | mRNA splicing, via spliceosome                                                   | 200/7778 | 379/18670 | 6.93E-06 | 6.75E-05  | 4.11E-05 |
| BP | GO:0001101 | response to acid chemical                                                        | 183/7778 | 343/18670 | 7.01E-06 | 6.82E-05  | 4.15E-05 |
| BP | GO:0098930 | axonal transport                                                                 | 41/7778  | 58/18670  | 7.16E-06 | 6.16E-05  | 4.23E-05 |
| BP | GO:1902041 | regulation of extrinsic apoptotic signaling pathway via death domain             | 41/7778  | 58/18670  | 7.16E-06 | 6.94E-05  | 4.23E-05 |
| BP | GO:1903749 | positive regulation of establishment of protein localization to mitochondria     | 41/7778  | 58/18670  | 7.16E-06 | 6.94E-05  | 4.23E-05 |
| BP | GO:2000060 | positive regulation of ubiquitin-dependent protein catabolic process             | 61/7778  | 95/18670  | 7.43E-06 | 7.18E-05  | 4.37E-05 |
| BP | GO:0097061 | dendritic spine organization                                                     | 53/7778  | 80/18670  | 7.58E-06 | 7.32E-05  | 4.46E-05 |
| BP | GO:0007566 | embryo implantation                                                              | 37/7778  | 51/18670  | 7.60E-06 | 7.32E-05  | 4.46E-05 |
| BP | GO:0048146 | positive regulation of fibroblast proliferation                                  | 37/7778  | 51/18670  | 7.60E-06 | 7.32E-05  | 4.46E-05 |
| BP | GO:0032212 | positive regulation of telomere maintenance via telomerase                       | 27/7778  | 34/18670  | 7.94E-06 | 7.61E-05  | 4.63E-05 |
| BP | GO:0043516 | regulation of DNA damage response, signal transduction by p53 class mediator     | 27/7778  | 34/18670  | 7.94E-06 | 7.61E-05  | 4.63E-05 |
| BP | GO:2000816 | negative regulation of mitotic sister chromatid separation                       | 30/7778  | 39/18670  | 7.94E-06 | 7.61E-05  | 4.63E-05 |
| BP | GO:0051851 | modulation by host of symbiont process                                           | 42/7778  | 60/18670  | 8.26E-06 | 7.89E-05  | 4.81E-05 |
| BP | GO:1902110 | positive regulation of mitochondrial membrane permeability involved in apoptosis | 42/7778  | 60/18670  | 8.26E-06 | 7.89E-05  | 4.81E-05 |
| BP | GO:0042119 | neutrophil activation                                                            | 255/7778 | 498/18670 | 8.44E-06 | 8.04E-05  | 4.90E-05 |
| BP | GO:0060759 | regulation of response to cytokine stimulus                                      | 109/7778 | 190/18670 | 8.44E-06 | 8.04E-05  | 4.90E-05 |
| BP | GO:0009755 | hormone-mediated signaling pathway                                               | 130/7778 | 233/18670 | 8.54E-06 | 8.13E-05  | 4.95E-05 |
| BP | GO:0043409 | negative regulation of MAPK cascade                                              | 106/7778 | 184/18670 | 8.66E-06 | 8.23E-05  | 5.01E-05 |
| BP | GO:0008654 | phospholipid biosynthetic process                                                | 143/7778 | 260/18670 | 8.77E-06 | 8.32E-05  | 5.06E-05 |
| BP | GO:0071346 | cellular response to interferon-gamma                                            | 104/7778 | 180/18670 | 8.79E-06 | 8.33E-05  | 5.07E-05 |
| BP | GO:0038127 | ERBB signaling pathway                                                           | 85/7778  | 142/18670 | 8.84E-06 | 8.36E-05  | 5.09E-05 |
| BP | GO:1902099 | regulation of metaphase/anaphase transition of cell cycle                        | 38/7778  | 53/18670  | 9.06E-06 | 8.56E-05  | 5.21E-05 |
| BP | GO:0009132 | nucleoside diphosphate metabolic process                                         | 91/7778  | 154/18670 | 9.11E-06 | 8.58E-05  | 5.22E-05 |
| BP | GO:0032480 | negative regulation of type I interferon production                              | 34/7778  | 46/18670  | 9.11E-06 | 8.58E-05  | 5.22E-05 |
| BP | GO:1904356 | regulation of telomere maintenance via telomere lengthening                      | 43/7778  | 62/18670  | 9.41E-06 | 8.85E-05  | 5.39E-05 |
| BP | GO:0043044 | ATP-dependent chromatin remodeling                                               | 57/7778  | 88/18670  | 9.92E-06 | 9.29E-05  | 5.66E-05 |
| BP | GO:0106027 | neuron projection organization                                                   | 57/7778  | 88/18670  | 9.92E-06 | 9.29E-05  | 5.66E-05 |
| BP | GO:0043281 | regulation of cysteine-type endopeptidase activity involved in apoptosis         | 121/7778 | 215/18670 | 9.92E-06 | 9.29E-05  | 5.66E-05 |
| BP | GO:0032535 | regulation of cellular component size                                            | 195/7778 | 370/18670 | 9.97E-06 | 9.32E-05  | 5.67E-05 |
| BP | GO:0002446 | neutrophil mediated immunity                                                     | 255/7778 | 499/18670 | 1.02E-05 | 9.51E-05  | 5.79E-05 |
| BP | GO:0019318 | hexose metabolic process                                                         | 135/7778 | 244/18670 | 1.03E-05 | 9.63E-05  | 5.86E-05 |
| BP | GO:0019985 | translesion synthesis                                                            | 31/7778  | 41/18670  | 1.04E-05 | 9.68E-05  | 5.90E-05 |
| BP | GO:0045185 | maintenance of protein location                                                  | 58/7778  | 90/18670  | 1.05E-05 | 9.75E-05  | 5.93E-05 |
| BP | GO:1902253 | regulation of intrinsic apoptotic signaling pathway by p53 class mediator        | 25/7778  | 31/18670  | 1.06E-05 | 9.82E-05  | 5.98E-05 |
| BP | GO:0006360 | transcription by RNA polymerase I                                                | 44/7778  | 64/18670  | 1.06E-05 | 9.83E-05  | 5.98E-05 |
| BP | GO:0046578 | regulation of Ras protein signal transduction                                    | 132/7778 | 238/18670 | 1.10E-05 | 0.0001014 | 6.17E-05 |
| BP | GO:0061014 | positive regulation of mRNA catabolic process                                    | 35/7778  | 48/18670  | 1.12E-05 | 0.0001031 | 6.28E-05 |
| BP | GO:1905710 | positive regulation of cellular membrane permeability                            | 45/7778  | 66/18670  | 1.18E-05 | 0.0001092 | 6.65E-05 |
| BP | GO:0014706 | striated muscle tissue development                                               | 204/7778 | 390/18670 | 1.19E-05 | 0.0001093 | 6.66E-05 |
| BP | GO:0099111 | microtubule-based transport                                                      | 107/7778 | 187/18670 | 1.19E-05 | 0.0001095 | 6.67E-05 |
| BP | GO:0007369 | gastrulation                                                                     | 106/7778 | 185/18670 | 1.20E-05 | 0.0001102 | 6.71E-05 |
| BP | GO:0046328 | regulation of JNK cascade                                                        | 106/7778 | 185/18670 | 1.20E-05 | 0.0001102 | 6.71E-05 |
| BP | GO:0006333 | chromatin assembly or disassembly                                                | 127/7778 | 228/18670 | 1.20E-05 | 0.0001102 | 6.71E-05 |
| BP | GO:0032970 | regulation of actin filament-based process                                       | 203/7778 | 388/18670 | 1.22E-05 | 0.0001118 | 6.81E-05 |
| BP | GO:0008361 | regulation of cell size                                                          | 103/7778 | 179/18670 | 1.24E-05 | 0.0001129 | 6.87E-05 |
| BP | GO:0072163 | mesonephric epithelium development                                               | 62/7778  | 98/18670  | 1.26E-05 | 0.0001152 | 7.01E-05 |
| BP | GO:0072164 | mesonephric tubule development                                                   | 62/7778  | 98/18670  | 1.26E-05 | 0.0001152 | 7.01E-05 |
| BP | GO:0010634 | positive regulation of epithelial cell migration                                 | 99/7778  | 171/18670 | 1.27E-05 | 0.0001157 | 7.04E-05 |
| BP | GO:0042254 | ribosome biogenesis                                                              | 160/7778 | 297/18670 | 1.28E-05 | 0.0001161 | 7.07E-05 |
| BP | GO:0106106 | cold-induced thermogenesis                                                       | 85/7778  | 143/18670 | 1.29E-05 | 0.0001172 | 7.13E-05 |
| BP | GO:0120161 | regulation of cold-induced thermogenesis                                         | 85/7778  | 143/18670 | 1.29E-05 | 0.0001172 | 7.13E-05 |
| BP | GO:0071901 | negative regulation of protein serine/threonine kinase activity                  | 86/7778  | 145/18670 | 1.30E-05 | 0.0001175 | 7.15E-05 |
| BP | GO:0016239 | positive regulation of macroautophagy                                            | 46/7778  | 68/18670  | 1.31E-05 | 0.0001183 | 7.20E-05 |
| BP | GO:0036503 | ERAD pathway                                                                     | 63/7778  | 100/18670 | 1.31E-05 | 0.0001185 | 7.22E-05 |
| BP | GO:0008631 | intrinsic apoptotic signaling pathway in response to oxidative stress            | 32/7778  | 43/18670  | 1.32E-05 | 0.000119  | 7.25E-05 |
| BP | GO:0006323 | DNA packaging                                                                    | 136/7778 | 247/18670 | 1.33E-05 | 0.0001199 | 7.30E-05 |
| BP | GO:0010718 | positive regulation of epithelial to mesenchymal transition                      | 36/7778  | 50/18670  | 1.34E-05 | 0.0001199 | 7.30E-05 |
| BP | GO:0046854 | phosphatidylinositol phosphorylation                                             | 36/7778  | 50/18670  | 1.34E-05 | 0.0001199 | 7.30E-05 |
| BP | GO:0070671 | response to interleukin-12                                                       | 36/7778  | 50/18670  | 1.34E-05 | 0.0001199 | 7.30E-05 |
| BP | GO:0001836 | release of cytochrome c from mitochondria                                        | 41/7778  | 59/18670  | 1.40E-05 | 0.0001256 | 7.65E-05 |
| BP | GO:0042110 | T cell activation                                                                | 238/7778 | 464/18670 | 1.43E-05 | 0.0001275 | 7.76E-05 |
| BP | GO:0007004 | telomere maintenance via telomerase                                              | 47/7778  | 70/18670  | 1.44E-05 | 0.0001282 | 7.81E-05 |
| BP | GO:2000116 | regulation of cysteine-type endopeptidase activity                               | 132/7778 | 239/18670 | 1.45E-05 | 0.0001291 | 7.86E-05 |
| BP | GO:0002573 | myeloid leukocyte differentiation                                                | 115/7778 | 204/18670 | 1.47E-05 | 0.0001307 | 7.96E-05 |
| BP | GO:0002756 | MyD88-independent toll-like receptor signaling pathway                           | 26/7778  | 33/18670  | 1.53E-05 | 0.0001352 | 8.23E-05 |
| BP | GO:0033028 | myeloid cell apoptotic process                                                   | 26/7778  | 33/18670  | 1.53E-05 | 0.0001352 | 8.23E-05 |
| BP | GO:2000758 | positive regulation of peptidyl-lysine acetylation                               | 26/7778  | 33/18670  | 1.53E-05 | 0.0001352 | 8.23E-05 |
| BP | GO:0022407 | regulation of cell-cell adhesion                                                 | 209/7778 | 402/18670 | 1.56E-05 | 0.0001377 | 8.39E-05 |
| BP | GO:0061180 | mammary gland epithelium development                                             | 48/7778  | 72/18670  | 1.57E-05 | 0.0001384 | 8.43E-05 |
| BP | GO:0099518 | vesicle cytoskeletal trafficking                                                 | 37/7778  | 52/18670  | 1.58E-05 | 0.0001392 | 8.47E-05 |
| BP | GO:0003170 | heart valve development                                                          | 42/7778  | 61/18670  | 1.58E-05 | 0.0001396 | 8.50E-05 |
| BP | GO:0046390 | ribose phosphate biosynthetic process                                            | 109/7778 | 192/18670 | 1.60E-05 | 0.0001405 | 8.55E-05 |
| BP | GO:0016574 | histone ubiquitination                                                           | 33/7778  | 45/18670  | 1.63E-05 | 0.0001433 | 8.73E-05 |

|    |            |                                                                                        |          |           |          |           |          |
|----|------------|----------------------------------------------------------------------------------------|----------|-----------|----------|-----------|----------|
| BP | GO:0051204 | protein insertion into mitochondrial membrane                                          | 33/7778  | 45/18670  | 1.63E-05 | 0.0001433 | 8.73E-05 |
| BP | GO:0006661 | phosphatidylinositol biosynthetic process                                              | 71/7778  | 116/18670 | 1.64E-05 | 0.0001437 | 8.75E-05 |
| BP | GO:0032259 | methylation                                                                            | 192/7778 | 366/18670 | 1.68E-05 | 0.0001473 | 8.97E-05 |
| BP | GO:0017015 | regulation of transforming growth factor beta receptor signaling pathway               | 73/7778  | 120/18670 | 1.70E-05 | 0.0001485 | 9.04E-05 |
| BP | GO:1900101 | regulation of endoplasmic reticulum unfolded protein response                          | 21/7778  | 25/18670  | 1.71E-05 | 0.0001492 | 9.09E-05 |
| BP | GO:0048814 | regulation of dendrite morphogenesis                                                   | 58/7778  | 91/18670  | 1.72E-05 | 0.0001497 | 9.11E-05 |
| BP | GO:0060333 | interferon-gamma-mediated signaling pathway                                            | 58/7778  | 91/18670  | 1.72E-05 | 0.0001497 | 9.11E-05 |
| BP | GO:1901992 | positive regulation of mitotic cell cycle phase transition                             | 58/7778  | 91/18670  | 1.72E-05 | 0.0001497 | 9.11E-05 |
| BP | GO:1903844 | regulation of cellular response to transforming growth factor beta stim                | 74/7778  | 122/18670 | 1.73E-05 | 0.0001498 | 9.12E-05 |
| BP | GO:0006417 | regulation of translation                                                              | 219/7778 | 424/18670 | 1.73E-05 | 0.0001498 | 9.12E-05 |
| BP | GO:0006310 | DNA recombination                                                                      | 157/7778 | 292/18670 | 1.76E-05 | 0.0001527 | 9.30E-05 |
| BP | GO:0003231 | cardiac ventricle development                                                          | 78/7778  | 130/18670 | 1.81E-05 | 0.0001563 | 9.52E-05 |
| BP | GO:0000422 | autophagy of mitochondrion                                                             | 50/7778  | 76/18670  | 1.82E-05 | 0.0001572 | 9.57E-05 |
| BP | GO:0046902 | regulation of mitochondrial membrane permeability                                      | 50/7778  | 76/18670  | 1.82E-05 | 0.0001572 | 9.57E-05 |
| BP | GO:0061726 | mitochondrion disassembly                                                              | 50/7778  | 76/18670  | 1.82E-05 | 0.0001572 | 9.57E-05 |
| BP | GO:0032210 | regulation of telomere maintenance via telomerase                                      | 38/7778  | 54/18670  | 1.83E-05 | 0.0001574 | 9.58E-05 |
| BP | GO:0032956 | regulation of actin cytoskeleton organization                                          | 181/7778 | 343/18670 | 1.85E-05 | 0.0001591 | 9.68E-05 |
| BP | GO:0072006 | nephron development                                                                    | 84/7778  | 142/18670 | 1.87E-05 | 0.0001604 | 9.76E-05 |
| BP | GO:0035107 | appendage morphogenesis                                                                | 87/7778  | 148/18670 | 1.87E-05 | 0.0001605 | 9.77E-05 |
| BP | GO:0035108 | limb morphogenesis                                                                     | 87/7778  | 148/18670 | 1.88E-05 | 0.0001605 | 9.77E-05 |
| BP | GO:1905819 | negative regulation of chromosome separation                                           | 30/7778  | 40/18670  | 1.91E-05 | 0.000163  | 9.92E-05 |
| BP | GO:0045785 | positive regulation of cell adhesion                                                   | 209/7778 | 403/18670 | 1.91E-05 | 0.000163  | 9.93E-05 |
| BP | GO:0001657 | ureteric bud development                                                               | 61/7778  | 97/18670  | 1.94E-05 | 0.0001654 | 0.000101 |
| BP | GO:0060996 | dendritic spine development                                                            | 61/7778  | 97/18670  | 1.94E-05 | 0.0001654 | 0.000101 |
| BP | GO:0035722 | interleukin-12-mediated signaling pathway                                              | 34/7778  | 47/18670  | 1.97E-05 | 0.0001675 | 0.000102 |
| BP | GO:2001239 | regulation of extrinsic apoptotic signaling pathway in absence of ligand               | 34/7778  | 47/18670  | 1.97E-05 | 0.0001675 | 0.000102 |
| BP | GO:0051091 | positive regulation of DNA-binding transcription factor activity                       | 142/7778 | 261/18670 | 1.98E-05 | 0.0001682 | 0.000102 |
| BP | GO:0006925 | inflammatory cell apoptotic process                                                    | 19/7778  | 22/18670  | 2.01E-05 | 0.0001698 | 0.000103 |
| BP | GO:0045943 | positive regulation of transcription by RNA polymerase I                               | 19/7778  | 22/18670  | 2.01E-05 | 0.0001698 | 0.000103 |
| BP | GO:0010631 | epithelial cell migration                                                              | 185/7778 | 352/18670 | 2.06E-05 | 0.0001739 | 0.000106 |
| BP | GO:1902751 | positive regulation of cell cycle G2/M phase transition                                | 24/7778  | 30/18670  | 2.07E-05 | 0.0001741 | 0.000106 |
| BP | GO:0048194 | Golgi vesicle budding                                                                  | 52/7778  | 80/18670  | 2.08E-05 | 0.0001751 | 0.000107 |
| BP | GO:0006369 | termination of RNA polymerase II transcription                                         | 27/7778  | 35/18670  | 2.09E-05 | 0.0001757 | 0.000107 |
| BP | GO:0044784 | metaphase/anaphase transition of cell cycle                                            | 39/7778  | 56/18670  | 2.10E-05 | 0.000176  | 0.000107 |
| BP | GO:0046112 | nucleobase biosynthetic process                                                        | 17/7778  | 19/18670  | 2.14E-05 | 0.0001797 | 0.000109 |
| BP | GO:1902750 | negative regulation of cell cycle G2/M phase transition                                | 65/7778  | 105/18670 | 2.20E-05 | 0.0001842 | 0.000112 |
| BP | GO:0034644 | cellular response to UV                                                                | 53/7778  | 82/18670  | 2.20E-05 | 0.0001843 | 0.000112 |
| BP | GO:0006289 | nucleotide-excision repair                                                             | 67/7778  | 109/18670 | 2.31E-05 | 0.0001927 | 0.000117 |
| BP | GO:0010507 | negative regulation of autophagy                                                       | 54/7778  | 84/18670  | 2.32E-05 | 0.0001938 | 0.000118 |
| BP | GO:0043123 | positive regulation of I-kappaB kinase/NF-kappaB signaling                             | 104/7778 | 183/18670 | 2.33E-05 | 0.0001938 | 0.000118 |
| BP | GO:0050807 | regulation of synapse organization                                                     | 121/7778 | 218/18670 | 2.38E-05 | 0.0001981 | 0.000121 |
| BP | GO:0001959 | regulation of cytokine-mediated signaling pathway                                      | 101/7778 | 177/18670 | 2.41E-05 | 0.0002001 | 0.000122 |
| BP | GO:0060491 | regulation of cell projection assembly                                                 | 101/7778 | 177/18670 | 2.41E-05 | 0.0002001 | 0.000122 |
| BP | GO:0120032 | regulation of plasma membrane bounded cell projection assembly                         | 100/7778 | 175/18670 | 2.44E-05 | 0.0002015 | 0.000123 |
| BP | GO:0046660 | female sex differentiation                                                             | 70/7778  | 115/18670 | 2.44E-05 | 0.0002015 | 0.000123 |
| BP | GO:1904375 | regulation of protein localization to cell periphery                                   | 70/7778  | 115/18670 | 2.44E-05 | 0.0002015 | 0.000123 |
| BP | GO:0048013 | ephrin receptor signaling pathway                                                      | 55/7778  | 86/18670  | 2.44E-05 | 0.0002015 | 0.000123 |
| BP | GO:0090559 | regulation of membrane permeability                                                    | 55/7778  | 86/18670  | 2.44E-05 | 0.0002015 | 0.000123 |
| BP | GO:0051100 | negative regulation of binding                                                         | 97/7778  | 169/18670 | 2.51E-05 | 0.0002069 | 0.000126 |
| BP | GO:0051053 | negative regulation of DNA metabolic process                                           | 74/7778  | 123/18670 | 2.57E-05 | 0.0002117 | 0.000129 |
| BP | GO:0099173 | postsynapse organization                                                               | 94/7778  | 163/18670 | 2.58E-05 | 0.0002117 | 0.000129 |
| BP | GO:2000134 | negative regulation of G1/S transition of mitotic cell cycle                           | 75/7778  | 125/18670 | 2.60E-05 | 0.0002132 | 0.00013  |
| BP | GO:0030901 | midbrain development                                                                   | 57/7778  | 90/18670  | 2.67E-05 | 0.0002187 | 0.000133 |
| BP | GO:0050684 | regulation of mRNA processing                                                          | 81/7778  | 137/18670 | 2.68E-05 | 0.0002194 | 0.000134 |
| BP | GO:0016571 | histone methylation                                                                    | 82/7778  | 139/18670 | 2.69E-05 | 0.0002194 | 0.000134 |
| BP | GO:0033135 | regulation of peptidyl-serine phosphorylation                                          | 82/7778  | 139/18670 | 2.69E-05 | 0.0002194 | 0.000134 |
| BP | GO:0030879 | mammary gland development                                                              | 84/7778  | 143/18670 | 2.69E-05 | 0.0002194 | 0.000134 |
| BP | GO:1902916 | positive regulation of protein polyubiquitination                                      | 12/7778  | 12/18670  | 2.72E-05 | 0.0002215 | 0.000135 |
| BP | GO:0000731 | DNA synthesis involved in DNA repair                                                   | 36/7778  | 51/18670  | 2.73E-05 | 0.0002217 | 0.000135 |
| BP | GO:0006283 | transcription-coupled nucleotide-excision repair                                       | 48/7778  | 73/18670  | 2.73E-05 | 0.0002217 | 0.000135 |
| BP | GO:0050803 | regulation of synapse structure or activity                                            | 125/7778 | 227/18670 | 2.90E-05 | 0.0002354 | 0.000143 |
| BP | GO:0006356 | regulation of transcription by RNA polymerase I                                        | 25/7778  | 32/18670  | 2.91E-05 | 0.0002361 | 0.000144 |
| BP | GO:1902117 | positive regulation of organelle assembly                                              | 49/7778  | 75/18670  | 2.92E-05 | 0.0002362 | 0.000144 |
| BP | GO:0002753 | cytoplasmic pattern recognition receptor signaling pathway                             | 42/7778  | 62/18670  | 2.94E-05 | 0.0002367 | 0.000144 |
| BP | GO:0048857 | neural nucleus development                                                             | 42/7778  | 62/18670  | 2.94E-05 | 0.0002367 | 0.000144 |
| BP | GO:1902305 | regulation of sodium ion transmembrane transport                                       | 42/7778  | 62/18670  | 2.94E-05 | 0.0002367 | 0.000144 |
| BP | GO:0045665 | negative regulation of neuron differentiation                                          | 124/7778 | 225/18670 | 2.96E-05 | 0.0002385 | 0.000145 |
| BP | GO:0098876 | vesicle-mediated transport to the plasma membrane                                      | 60/7778  | 96/18670  | 2.97E-05 | 0.0002385 | 0.000145 |
| BP | GO:1990823 | response to leukemia inhibitory factor                                                 | 60/7778  | 96/18670  | 2.97E-05 | 0.0002385 | 0.000145 |
| BP | GO:1990830 | cellular response to leukemia inhibitory factor                                        | 60/7778  | 96/18670  | 2.97E-05 | 0.0002385 | 0.000145 |
| BP | GO:0043112 | receptor metabolic process                                                             | 108/7778 | 192/18670 | 2.99E-05 | 0.0002394 | 0.000146 |
| BP | GO:0045444 | fat cell differentiation                                                               | 123/7778 | 223/18670 | 3.03E-05 | 0.0002421 | 0.000147 |
| BP | GO:0000288 | nuclear-transcribed mRNA catabolic process, deadenylation-dependent                    | 50/7778  | 77/18670  | 3.10E-05 | 0.0002475 | 0.000151 |
| BP | GO:0051702 | interaction with symbiont                                                              | 50/7778  | 77/18670  | 3.10E-05 | 0.0002475 | 0.000151 |
| BP | GO:2000779 | regulation of double-strand break repair                                               | 50/7778  | 77/18670  | 3.10E-05 | 0.0002475 | 0.000151 |
| BP | GO:0010823 | negative regulation of mitochondrion organization                                      | 37/7778  | 53/18670  | 3.13E-05 | 0.0002491 | 0.000152 |
| BP | GO:0045088 | regulation of innate immune response                                                   | 162/7778 | 305/18670 | 3.15E-05 | 0.0002503 | 0.000152 |
| BP | GO:0090174 | organelle membrane fusion                                                              | 62/7778  | 100/18670 | 3.15E-05 | 0.0002504 | 0.000152 |
| BP | GO:0031334 | positive regulation of protein-containing complex assembly                             | 133/7778 | 244/18670 | 3.18E-05 | 0.0002519 | 0.000153 |
| BP | GO:0046834 | lipid phosphorylation                                                                  | 43/7778  | 64/18670  | 3.22E-05 | 0.0002555 | 0.000156 |
| BP | GO:0001823 | mesonephros development                                                                | 63/7778  | 102/18670 | 3.23E-05 | 0.0002559 | 0.000156 |
| BP | GO:0007032 | endosome organization                                                                  | 51/7778  | 79/18670  | 3.29E-05 | 0.0002595 | 0.000158 |
| BP | GO:0031110 | regulation of microtubule polymerization or depolymerization                           | 51/7778  | 79/18670  | 3.29E-05 | 0.0002595 | 0.000158 |
| BP | GO:0090100 | positive regulation of transmembrane receptor protein serine/threonine kinase activity | 64/7778  | 104/18670 | 3.31E-05 | 0.000261  | 0.000159 |
| BP | GO:0051961 | negative regulation of nervous system development                                      | 167/7778 | 316/18670 | 3.44E-05 | 0.0002709 | 0.000165 |
| BP | GO:1903533 | regulation of protein targeting                                                        | 52/7778  | 81/18670  | 3.46E-05 | 0.0002724 | 0.000166 |
| BP | GO:0010761 | fibroblast migration                                                                   | 29/7778  | 39/18670  | 3.47E-05 | 0.0002724 | 0.000166 |
| BP | GO:0072595 | maintenance of protein localization in organelle                                       | 29/7778  | 39/18670  | 3.47E-05 | 0.0002724 | 0.000166 |
| BP | GO:0048207 | vesicle targeting, rough ER to cis-Golgi                                               | 44/7778  | 66/18670  | 3.51E-05 | 0.000275  | 0.000167 |
| BP | GO:0048208 | COPII vesicle coating                                                                  | 44/7778  | 66/18670  | 3.51E-05 | 0.000275  | 0.000167 |
| BP | GO:0034724 | DNA replication-independent nucleosome organization                                    | 38/7778  | 55/18670  | 3.55E-05 | 0.0002772 | 0.000169 |
| BP | GO:0034968 | histone lysine methylation                                                             | 69/7778  | 114/18670 | 3.61E-05 | 0.0002823 | 0.000172 |

|    |            |                                                                           |          |           |          |           |          |
|----|------------|---------------------------------------------------------------------------|----------|-----------|----------|-----------|----------|
| BP | GO:0009743 | response to carbohydrate                                                  | 126/7778 | 230/18670 | 3.72E-05 | 0.0002902 | 0.000177 |
| BP | GO:1990845 | adaptive thermogenesis                                                    | 89/7778  | 154/18670 | 3.73E-05 | 0.0002907 | 0.000177 |
| BP | GO:0022612 | gland morphogenesis                                                       | 72/7778  | 120/18670 | 3.74E-05 | 0.0002907 | 0.000177 |
| BP | GO:0014066 | regulation of phosphatidylinositol 3-kinase signaling                     | 74/7778  | 124/18670 | 3.79E-05 | 0.0002948 | 0.000179 |
| BP | GO:0016601 | Rac protein signal transduction                                           | 26/7778  | 34/18670  | 3.91E-05 | 0.0003033 | 0.000185 |
| BP | GO:0090132 | epithelium migration                                                      | 185/7778 | 355/18670 | 3.91E-05 | 0.0003034 | 0.000185 |
| BP | GO:0010965 | regulation of mitotic sister chromatid separation                         | 39/7778  | 57/18670  | 3.97E-05 | 0.0003075 | 0.000187 |
| BP | GO:0051642 | centrosome localization                                                   | 23/7778  | 29/18670  | 4.00E-05 | 0.0003096 | 0.000188 |
| BP | GO:0030098 | lymphocyte differentiation                                                | 184/7778 | 353/18670 | 4.03E-05 | 0.0003114 | 0.00019  |
| BP | GO:0008089 | anterograde axonal transport                                              | 34/7778  | 48/18670  | 4.06E-05 | 0.0003123 | 0.00019  |
| BP | GO:0051653 | spindle localization                                                      | 34/7778  | 48/18670  | 4.06E-05 | 0.0003123 | 0.00019  |
| BP | GO:0061647 | histone H3-K9 modification                                                | 34/7778  | 48/18670  | 4.06E-05 | 0.0003123 | 0.00019  |
| BP | GO:0006901 | vesicle coating                                                           | 46/7778  | 70/18670  | 4.08E-05 | 0.000314  | 0.000191 |
| BP | GO:0032465 | regulation of cytokinesis                                                 | 56/7778  | 89/18670  | 4.11E-05 | 0.0003156 | 0.000192 |
| BP | GO:0051604 | protein maturation                                                        | 152/7778 | 285/18670 | 4.13E-05 | 0.0003169 | 0.000193 |
| BP | GO:0003002 | regionalization                                                           | 183/7778 | 351/18670 | 4.15E-05 | 0.000318  | 0.000194 |
| BP | GO:0043312 | neutrophil degranulation                                                  | 245/7778 | 485/18670 | 4.16E-05 | 0.000318  | 0.000194 |
| BP | GO:0090305 | nucleic acid phosphodiester bond hydrolysis                               | 160/7778 | 302/18670 | 4.18E-05 | 0.0003197 | 0.000195 |
| BP | GO:0043153 | entrainment of circadian clock by photoperiod                             | 18/7778  | 21/18670  | 4.19E-05 | 0.0003197 | 0.000195 |
| BP | GO:0071459 | protein localization to chromosome, centromeric region                    | 18/7778  | 21/18670  | 4.19E-05 | 0.0003197 | 0.000195 |
| BP | GO:0098927 | vesicle-mediated transport between endosomal compartments                 | 30/7778  | 41/18670  | 4.27E-05 | 0.0003253 | 0.000198 |
| BP | GO:0009260 | ribonucleotide biosynthetic process                                       | 104/7778 | 185/18670 | 4.30E-05 | 0.0003267 | 0.000199 |
| BP | GO:0036473 | cell death in response to oxidative stress                                | 58/7778  | 93/18670  | 4.39E-05 | 0.0003337 | 0.000203 |
| BP | GO:0097711 | ciliary basal body-plasma membrane docking                                | 59/7778  | 95/18670  | 4.52E-05 | 0.0003431 | 0.000209 |
| BP | GO:0060560 | developmental growth involved in morphogenesis                            | 128/7778 | 235/18670 | 4.63E-05 | 0.0003509 | 0.000214 |
| BP | GO:1900006 | positive regulation of dendrite development                               | 48/7778  | 74/18670  | 4.64E-05 | 0.0003511 | 0.000214 |
| BP | GO:0001961 | positive regulation of cytokine-mediated signaling pathway                | 35/7778  | 50/18670  | 4.67E-05 | 0.0003534 | 0.000215 |
| BP | GO:0001659 | temperature homeostasis                                                   | 98/7778  | 173/18670 | 4.69E-05 | 0.0003544 | 0.000216 |
| BP | GO:0002283 | neutrophil activation involved in immune response                         | 246/7778 | 488/18670 | 4.80E-05 | 0.000362  | 0.00022  |
| BP | GO:0051188 | cofactor biosynthetic process                                             | 126/7778 | 231/18670 | 4.85E-05 | 0.0003649 | 0.000222 |
| BP | GO:0061448 | connective tissue development                                             | 146/7778 | 273/18670 | 4.85E-05 | 0.0003649 | 0.000222 |
| BP | GO:0046545 | development of primary female sexual characteristics                      | 62/7778  | 101/18670 | 4.86E-05 | 0.0003649 | 0.000222 |
| BP | GO:1903008 | organelle disassembly                                                     | 62/7778  | 101/18670 | 4.86E-05 | 0.0003649 | 0.000222 |
| BP | GO:0046785 | microtubule polymerization                                                | 49/7778  | 76/18670  | 4.90E-05 | 0.0003677 | 0.000224 |
| BP | GO:0048871 | multicellular organismal homeostasis                                      | 245/7778 | 486/18670 | 4.95E-05 | 0.000371  | 0.000226 |
| BP | GO:0006612 | protein targeting to membrane                                             | 112/7778 | 202/18670 | 4.99E-05 | 0.000373  | 0.000227 |
| BP | GO:0045740 | positive regulation of DNA replication                                    | 27/7778  | 36/18670  | 5.03E-05 | 0.000376  | 0.000229 |
| BP | GO:0030433 | ubiquitin-dependent ERAD pathway                                          | 50/7778  | 78/18670  | 5.16E-05 | 0.0003853 | 0.000235 |
| BP | GO:0003179 | heart valve morphogenesis                                                 | 36/7778  | 52/18670  | 5.31E-05 | 0.0003953 | 0.000241 |
| BP | GO:2000649 | regulation of sodium ion transmembrane transporter activity               | 36/7778  | 52/18670  | 5.31E-05 | 0.0003953 | 0.000241 |
| BP | GO:0032897 | negative regulation of viral transcription                                | 21/7778  | 26/18670  | 5.38E-05 | 0.0003984 | 0.000243 |
| BP | GO:0060765 | regulation of androgen receptor signaling pathway                         | 21/7778  | 26/18670  | 5.38E-05 | 0.0003984 | 0.000243 |
| BP | GO:1900739 | regulation of protein insertion into mitochondrial membrane involved      | 21/7778  | 26/18670  | 5.38E-05 | 0.0003984 | 0.000243 |
| BP | GO:1900740 | positive regulation of protein insertion into mitochondrial membrane      | 121/7778 | 26/18670  | 5.38E-05 | 0.0003984 | 0.000243 |
| BP | GO:1903203 | regulation of oxidative stress-induced neuron death                       | 21/7778  | 26/18670  | 5.38E-05 | 0.0003984 | 0.000243 |
| BP | GO:0007173 | epidermal growth factor receptor signaling pathway                        | 71/7778  | 119/18670 | 5.46E-05 | 0.0004036 | 0.000246 |
| BP | GO:1901293 | nucleoside phosphate biosynthetic process                                 | 150/7778 | 282/18670 | 5.51E-05 | 0.000406  | 0.000247 |
| BP | GO:0010165 | response to X-ray                                                         | 24/7778  | 31/18670  | 5.52E-05 | 0.000406  | 0.000247 |
| BP | GO:0045737 | positive regulation of cyclin-dependent protein serine/threonine kinase   | 24/7778  | 31/18670  | 5.52E-05 | 0.000406  | 0.000247 |
| BP | GO:1902895 | positive regulation of pri-miRNA transcription by RNA polymerase II       | 24/7778  | 31/18670  | 5.52E-05 | 0.000406  | 0.000247 |
| BP | GO:0030326 | embryonic limb morphogenesis                                              | 74/7778  | 125/18670 | 5.53E-05 | 0.000406  | 0.000247 |
| BP | GO:0035113 | embryonic appendage morphogenesis                                         | 74/7778  | 125/18670 | 5.53E-05 | 0.000406  | 0.000247 |
| BP | GO:0090130 | tissue migration                                                          | 187/7778 | 361/18670 | 5.57E-05 | 0.0004086 | 0.000249 |
| BP | GO:0031345 | negative regulation of cell projection organization                       | 105/7778 | 188/18670 | 5.68E-05 | 0.0004161 | 0.000253 |
| BP | GO:0009165 | nucleotide biosynthetic process                                           | 148/7778 | 278/18670 | 5.82E-05 | 0.0004262 | 0.000259 |
| BP | GO:0042692 | muscle cell differentiation                                               | 198/7778 | 385/18670 | 5.93E-05 | 0.0004337 | 0.000264 |
| BP | GO:0006336 | DNA replication-independent nucleosome assembly                           | 37/7778  | 54/18670  | 5.95E-05 | 0.0004349 | 0.000265 |
| BP | GO:0048538 | thymus development                                                        | 32/7778  | 45/18670  | 6.04E-05 | 0.0004407 | 0.000268 |
| BP | GO:2000573 | positive regulation of DNA biosynthetic process                           | 44/7778  | 67/18670  | 6.12E-05 | 0.0004458 | 0.000271 |
| BP | GO:0045022 | early endosome to late endosome transport                                 | 28/7778  | 38/18670  | 6.27E-05 | 0.0004561 | 0.000278 |
| BP | GO:0030323 | respiratory tube development                                              | 99/7778  | 176/18670 | 6.28E-05 | 0.0004563 | 0.000278 |
| BP | GO:0030900 | forebrain development                                                     | 196/7778 | 381/18670 | 6.31E-05 | 0.000458  | 0.000279 |
| BP | GO:0002064 | epithelial cell development                                               | 114/7778 | 207/18670 | 6.32E-05 | 0.0004583 | 0.000279 |
| BP | GO:0007389 | pattern specification process                                             | 226/7778 | 446/18670 | 6.32E-05 | 0.0004583 | 0.000279 |
| BP | GO:0046488 | phosphatidylinositol metabolic process                                    | 98/7778  | 174/18670 | 6.37E-05 | 0.0004614 | 0.000281 |
| BP | GO:0045778 | positive regulation of ossification                                       | 56/7778  | 90/18670  | 6.49E-05 | 0.000469  | 0.000286 |
| BP | GO:0006906 | vesicle fusion                                                            | 58/7778  | 94/18670  | 6.83E-05 | 0.0004936 | 0.000301 |
| BP | GO:0047496 | vesicle transport along microtubule                                       | 33/7778  | 47/18670  | 6.98E-05 | 0.0005031 | 0.000306 |
| BP | GO:0008585 | female gonad development                                                  | 59/7778  | 96/18670  | 6.99E-05 | 0.0005031 | 0.000306 |
| BP | GO:0048010 | vascular endothelial growth factor receptor signaling pathway             | 59/7778  | 96/18670  | 6.99E-05 | 0.0005031 | 0.000306 |
| BP | GO:1902254 | negative regulation of intrinsic apoptotic signaling pathway by p53 class | 19/7778  | 23/18670  | 7.01E-05 | 0.0005038 | 0.000307 |
| BP | GO:0051235 | maintenance of location                                                   | 165/7778 | 315/18670 | 7.05E-05 | 0.0005065 | 0.000308 |
| BP | GO:0010464 | regulation of mesenchymal cell proliferation                              | 25/7778  | 33/18670  | 7.25E-05 | 0.000519  | 0.000316 |
| BP | GO:0016242 | negative regulation of macroautophagy                                     | 25/7778  | 33/18670  | 7.25E-05 | 0.000519  | 0.000316 |
| BP | GO:0035306 | positive regulation of dephosphorylation                                  | 39/7778  | 58/18670  | 7.26E-05 | 0.000519  | 0.000316 |
| BP | GO:0051058 | negative regulation of small GTPase mediated signal transduction          | 39/7778  | 58/18670  | 7.26E-05 | 0.000519  | 0.000316 |
| BP | GO:0007219 | Notch signaling pathway                                                   | 107/7778 | 193/18670 | 7.29E-05 | 0.0005206 | 0.000317 |
| BP | GO:0090092 | regulation of transmembrane receptor protein serine/threonine kinase      | 130/7778 | 241/18670 | 7.34E-05 | 0.0005237 | 0.000319 |
| BP | GO:0007517 | muscle organ development                                                  | 209/7778 | 410/18670 | 7.47E-05 | 0.0005325 | 0.000324 |
| BP | GO:0048705 | skeletal system morphogenesis                                             | 129/7778 | 239/18670 | 7.53E-05 | 0.0005358 | 0.000326 |
| BP | GO:0042542 | response to hydrogen peroxide                                             | 84/7778  | 146/18670 | 7.57E-05 | 0.0005384 | 0.000328 |
| BP | GO:0044003 | modulation by symbiont of host process                                    | 29/7778  | 40/18670  | 7.59E-05 | 0.0005393 | 0.000328 |
| BP | GO:0051225 | spindle assembly                                                          | 65/7778  | 108/18670 | 7.67E-05 | 0.0005436 | 0.000331 |
| BP | GO:0033137 | negative regulation of peptidyl-serine phosphorylation                    | 22/7778  | 28/18670  | 7.70E-05 | 0.0005436 | 0.000331 |
| BP | GO:0033598 | mammary gland epithelial cell proliferation                               | 22/7778  | 28/18670  | 7.70E-05 | 0.0005436 | 0.000331 |
| BP | GO:0051984 | positive regulation of chromosome segregation                             | 22/7778  | 28/18670  | 7.70E-05 | 0.0005436 | 0.000331 |
| BP | GO:0060260 | regulation of transcription initiation from RNA polymerase II promoter    | 22/7778  | 28/18670  | 7.70E-05 | 0.0005436 | 0.000331 |
| BP | GO:0050808 | synapse organization                                                      | 208/7778 | 408/18670 | 7.71E-05 | 0.0005439 | 0.000331 |
| BP | GO:0032507 | maintenance of protein location in cell                                   | 40/7778  | 60/18670  | 7.91E-05 | 0.0005566 | 0.000339 |
| BP | GO:0051306 | mitotic sister chromatid separation                                       | 40/7778  | 60/18670  | 7.91E-05 | 0.0005566 | 0.000339 |
| BP | GO:0000184 | nuclear-transcribed mRNA catabolic process, nonsense-mediated decay       | 71/7778  | 120/18670 | 7.95E-05 | 0.000559  | 0.00034  |
| BP | GO:0043523 | regulation of neuron apoptotic process                                    | 115/7778 | 210/18670 | 8.11E-05 | 0.0005699 | 0.000347 |

|    |            |                                                                                   |          |           |           |           |          |
|----|------------|-----------------------------------------------------------------------------------|----------|-----------|-----------|-----------|----------|
| BP | GO:0006644 | phospholipid metabolic process                                                    | 218/7778 | 430/18670 | 8.13E-05  | 0.0005706 | 0.000347 |
| BP | GO:0051205 | protein insertion into membrane                                                   | 41/7778  | 62/18670  | 8.54E-05  | 0.0005976 | 0.000364 |
| BP | GO:1905268 | negative regulation of chromatin organization                                     | 41/7778  | 62/18670  | 8.54E-05  | 0.0005976 | 0.000364 |
| BP | GO:1905818 | regulation of chromosome separation                                               | 41/7778  | 62/18670  | 8.54E-05  | 0.0005976 | 0.000364 |
| BP | GO:0070987 | error-free translesion synthesis                                                  | 17/7778  | 20/18670  | 8.69E-05  | 0.0006073 | 0.00037  |
| BP | GO:0072666 | establishment of protein localization to vacuole                                  | 35/7778  | 51/18670  | 8.94E-05  | 0.0006237 | 0.00038  |
| BP | GO:0031057 | negative regulation of histone modification                                       | 30/7778  | 42/18670  | 8.99E-05  | 0.0006256 | 0.000381 |
| BP | GO:0042149 | cellular response to glucose starvation                                           | 30/7778  | 42/18670  | 8.99E-05  | 0.0006256 | 0.000381 |
| BP | GO:1903146 | regulation of autophagy of mitochondrion                                          | 30/7778  | 42/18670  | 8.99E-05  | 0.0006256 | 0.000381 |
| BP | GO:0032435 | negative regulation of proteasomal ubiquitin-dependent protein catabolic process  | 26/7778  | 35/18670  | 9.16E-05  | 0.0006345 | 0.000386 |
| BP | GO:0033144 | negative regulation of intracellular steroid hormone receptor signaling pathway   | 26/7778  | 35/18670  | 9.16E-05  | 0.0006345 | 0.000386 |
| BP | GO:0060338 | regulation of type I interferon-mediated signaling pathway                        | 26/7778  | 35/18670  | 9.16E-05  | 0.0006345 | 0.000386 |
| BP | GO:1904031 | positive regulation of cyclin-dependent protein kinase activity                   | 26/7778  | 35/18670  | 9.16E-05  | 0.0006345 | 0.000386 |
| BP | GO:0046782 | regulation of viral transcription                                                 | 42/7778  | 64/18670  | 9.17E-05  | 0.0006345 | 0.000386 |
| BP | GO:0046677 | response to antibiotic                                                            | 170/7778 | 327/18670 | 9.28E-05  | 0.0006415 | 0.000391 |
| BP | GO:0002028 | regulation of sodium ion transport                                                | 53/7778  | 85/18670  | 9.31E-05  | 0.0006428 | 0.000391 |
| BP | GO:0045333 | cellular respiration                                                              | 107/7778 | 194/18670 | 9.64E-05  | 0.0006649 | 0.000405 |
| BP | GO:0006268 | DNA unwinding involved in DNA replication                                         | 13/7778  | 14/18670  | 9.72E-05  | 0.0006678 | 0.000407 |
| BP | GO:0043922 | negative regulation by host of viral transcription                                | 13/7778  | 14/18670  | 9.72E-05  | 0.0006678 | 0.000407 |
| BP | GO:0060211 | regulation of nuclear-transcribed mRNA poly(A) tail shortening                    | 13/7778  | 14/18670  | 9.72E-05  | 0.0006678 | 0.000407 |
| BP | GO:0090110 | COPII-coated vesicle cargo loading                                                | 13/7778  | 14/18670  | 9.72E-05  | 0.0006678 | 0.000407 |
| BP | GO:1902108 | regulation of mitochondrial membrane permeability involved in apoptosis           | 43/7778  | 66/18670  | 9.78E-05  | 0.0006708 | 0.000408 |
| BP | GO:0007565 | female pregnancy                                                                  | 106/7778 | 192/18670 | 9.84E-05  | 0.0006745 | 0.000411 |
| BP | GO:1901185 | negative regulation of ERBB signaling pathway                                     | 36/7778  | 53/18670  | 9.92E-05  | 0.0006793 | 0.000414 |
| BP | GO:0006895 | Golgi to endosome transport                                                       | 15/7778  | 17/18670  | 9.93E-05  | 0.0006794 | 0.000414 |
| BP | GO:0010972 | negative regulation of G2/M transition of mitotic cell cycle                      | 57/7778  | 93/18670  | 0.0001027 | 0.0007015 | 0.000427 |
| BP | GO:0007162 | negative regulation of cell adhesion                                              | 152/7778 | 289/18670 | 0.0001028 | 0.0007015 | 0.000427 |
| BP | GO:1902105 | regulation of leukocyte differentiation                                           | 144/7778 | 272/18670 | 0.0001031 | 0.0007031 | 0.000428 |
| BP | GO:0035066 | positive regulation of histone acetylation                                        | 23/7778  | 30/18670  | 0.0001037 | 0.0007046 | 0.000429 |
| BP | GO:0061842 | microtubule organizing center localization                                        | 23/7778  | 30/18670  | 0.0001037 | 0.0007046 | 0.000429 |
| BP | GO:0071480 | cellular response to gamma radiation                                              | 23/7778  | 30/18670  | 0.0001037 | 0.0007046 | 0.000429 |
| BP | GO:0007019 | microtubule depolymerization                                                      | 31/7778  | 44/18670  | 0.0001044 | 0.0007074 | 0.000431 |
| BP | GO:0007080 | mitotic metaphase plate congression                                               | 31/7778  | 44/18670  | 0.0001044 | 0.0007074 | 0.000431 |
| BP | GO:1903573 | negative regulation of response to endoplasmic reticulum stress                   | 31/7778  | 44/18670  | 0.0001044 | 0.0007074 | 0.000431 |
| BP | GO:0006650 | glycerophospholipid metabolic process                                             | 166/7778 | 319/18670 | 0.0001046 | 0.0007078 | 0.000431 |
| BP | GO:0002053 | positive regulation of mesenchymal cell proliferation                             | 20/7778  | 25/18670  | 0.0001053 | 0.0007112 | 0.000433 |
| BP | GO:0009648 | photoperiodism                                                                    | 20/7778  | 25/18670  | 0.0001053 | 0.0007112 | 0.000433 |
| BP | GO:0045927 | positive regulation of growth                                                     | 143/7778 | 270/18670 | 0.0001061 | 0.0007155 | 0.000436 |
| BP | GO:0045017 | glycerolipid biosynthetic process                                                 | 134/7778 | 251/18670 | 0.0001076 | 0.0007249 | 0.000441 |
| BP | GO:0007018 | microtubule-based movement                                                        | 150/7778 | 285/18670 | 0.0001089 | 0.0007329 | 0.000446 |
| BP | GO:0048525 | negative regulation of viral process                                              | 61/7778  | 101/18670 | 0.0001093 | 0.0007348 | 0.000447 |
| BP | GO:0010565 | regulation of cellular ketone metabolic process                                   | 100/7778 | 180/18670 | 0.0001109 | 0.0007447 | 0.000453 |
| BP | GO:0051258 | protein polymerization                                                            | 149/7778 | 283/18670 | 0.000112  | 0.0007519 | 0.000458 |
| BP | GO:0042307 | positive regulation of protein import into nucleus                                | 27/7778  | 37/18670  | 0.0001122 | 0.0007519 | 0.000458 |
| BP | GO:1902807 | negative regulation of cell cycle G1/S phase transition                           | 76/7778  | 131/18670 | 0.0001124 | 0.0007526 | 0.000458 |
| BP | GO:0048675 | axon extension                                                                    | 71/7778  | 121/18670 | 0.0001144 | 0.0007656 | 0.000466 |
| BP | GO:0030324 | lung development                                                                  | 96/7778  | 172/18670 | 0.0001194 | 0.0007978 | 0.000486 |
| BP | GO:2000377 | regulation of reactive oxygen species metabolic process                           | 107/7778 | 195/18670 | 0.0001267 | 0.0008459 | 0.000515 |
| BP | GO:0061077 | chaperone-mediated protein folding                                                | 39/7778  | 59/18670  | 0.0001283 | 0.0008555 | 0.000521 |
| BP | GO:0043407 | negative regulation of MAP kinase activity                                        | 49/7778  | 78/18670  | 0.0001294 | 0.0008609 | 0.000524 |
| BP | GO:1903313 | positive regulation of mRNA metabolic process                                     | 49/7778  | 78/18670  | 0.0001294 | 0.0008609 | 0.000524 |
| BP | GO:0060317 | cardiac epithelial to mesenchymal transition                                      | 24/7778  | 32/18670  | 0.0001334 | 0.0008858 | 0.000539 |
| BP | GO:1902235 | regulation of endoplasmic reticulum stress-induced intrinsic apoptosis            | 24/7778  | 32/18670  | 0.0001334 | 0.0008858 | 0.000539 |
| BP | GO:2000826 | regulation of heart morphogenesis                                                 | 28/7778  | 39/18670  | 0.0001338 | 0.0008878 | 0.00054  |
| BP | GO:0030865 | cortical cytoskeleton organization                                                | 33/7778  | 48/18670  | 0.0001342 | 0.0008879 | 0.000541 |
| BP | GO:0042059 | negative regulation of epidermal growth factor receptor signaling pathway         | 33/7778  | 48/18670  | 0.0001342 | 0.0008879 | 0.000541 |
| BP | GO:2000059 | negative regulation of ubiquitin-dependent protein catabolic process              | 33/7778  | 48/18670  | 0.0001342 | 0.0008879 | 0.000541 |
| BP | GO:0015980 | energy derivation by oxidation of organic compounds                               | 150/7778 | 286/18670 | 0.0001356 | 0.0008957 | 0.000545 |
| BP | GO:2001244 | positive regulation of intrinsic apoptotic signaling pathway                      | 40/7778  | 61/18670  | 0.0001375 | 0.0009078 | 0.000553 |
| BP | GO:0007063 | regulation of sister chromatid cohesion                                           | 18/7778  | 22/18670  | 0.0001402 | 0.0009206 | 0.00056  |
| BP | GO:0032069 | regulation of nuclease activity                                                   | 18/7778  | 22/18670  | 0.0001402 | 0.0009206 | 0.00056  |
| BP | GO:0035024 | negative regulation of Rho protein signal transduction                            | 18/7778  | 22/18670  | 0.0001402 | 0.0009206 | 0.00056  |
| BP | GO:0051457 | maintenance of protein location in nucleus                                        | 18/7778  | 22/18670  | 0.0001402 | 0.0009206 | 0.00056  |
| BP | GO:0000187 | activation of MAPK activity                                                       | 86/7778  | 152/18670 | 0.0001403 | 0.0009206 | 0.00056  |
| BP | GO:0034250 | positive regulation of cellular amide metabolic process                           | 86/7778  | 152/18670 | 0.0001403 | 0.0009206 | 0.00056  |
| BP | GO:1903708 | positive regulation of hemopoiesis                                                | 102/7778 | 185/18670 | 0.0001411 | 0.0009244 | 0.000563 |
| BP | GO:0008360 | regulation of cell shape                                                          | 85/7778  | 150/18670 | 0.0001423 | 0.0009307 | 0.000567 |
| BP | GO:0031123 | RNA 3'-end processing                                                             | 85/7778  | 150/18670 | 0.0001423 | 0.0009307 | 0.000567 |
| BP | GO:0001776 | leukocyte homeostasis                                                             | 53/7778  | 86/18670  | 0.0001448 | 0.0009461 | 0.000576 |
| BP | GO:0009649 | entrainment of circadian clock                                                    | 21/7778  | 27/18670  | 0.0001467 | 0.0009526 | 0.00058  |
| BP | GO:0010971 | positive regulation of G2/M transition of mitotic cell cycle                      | 21/7778  | 27/18670  | 0.0001467 | 0.0009526 | 0.00058  |
| BP | GO:0036475 | neuron death in response to oxidative stress                                      | 21/7778  | 27/18670  | 0.0001467 | 0.0009526 | 0.00058  |
| BP | GO:0061437 | renal system vasculature development                                              | 21/7778  | 27/18670  | 0.0001467 | 0.0009526 | 0.00058  |
| BP | GO:0061440 | kidney vasculature development                                                    | 21/7778  | 27/18670  | 0.0001467 | 0.0009526 | 0.00058  |
| BP | GO:1902175 | regulation of oxidative stress-induced intrinsic apoptotic signaling pathway      | 21/7778  | 27/18670  | 0.0001467 | 0.0009526 | 0.00058  |
| BP | GO:0060425 | lung morphogenesis                                                                | 34/7778  | 50/18670  | 0.0001492 | 0.0009671 | 0.000589 |
| BP | GO:0070534 | protein K63-linked ubiquitination                                                 | 34/7778  | 50/18670  | 0.0001492 | 0.0009671 | 0.000589 |
| BP | GO:0031497 | chromatin assembly                                                                | 110/7778 | 202/18670 | 0.0001544 | 0.0009995 | 0.000609 |
| BP | GO:0031060 | regulation of histone methylation                                                 | 42/7778  | 65/18670  | 0.0001551 | 0.0010032 | 0.000611 |
| BP | GO:0006458 | 'de novo' protein folding                                                         | 29/7778  | 41/18670  | 0.0001562 | 0.0010092 | 0.000614 |
| BP | GO:0030219 | megakaryocyte differentiation                                                     | 58/7778  | 96/18670  | 0.0001576 | 0.0010162 | 0.000619 |
| BP | GO:0097327 | response to antineoplastic agent                                                  | 58/7778  | 96/18670  | 0.0001576 | 0.0010162 | 0.000619 |
| BP | GO:0019886 | antigen processing and presentation of exogenous peptide antigen via MHC class II | 59/7778  | 98/18670  | 0.0001593 | 0.0010253 | 0.000624 |
| BP | GO:0099175 | regulation of postsynapse organization                                            | 59/7778  | 98/18670  | 0.0001593 | 0.0010253 | 0.000624 |
| BP | GO:0045667 | regulation of osteoblast differentiation                                          | 73/7778  | 126/18670 | 0.0001611 | 0.001036  | 0.000631 |
| BP | GO:0046580 | negative regulation of Ras protein signal transduction                            | 35/7778  | 52/18670  | 0.0001641 | 0.0010526 | 0.000641 |
| BP | GO:1990089 | response to nerve growth factor                                                   | 35/7778  | 52/18670  | 0.0001641 | 0.0010526 | 0.000641 |
| BP | GO:0010922 | positive regulation of phosphatase activity                                       | 25/7778  | 34/18670  | 0.0001654 | 0.0010585 | 0.000644 |
| BP | GO:0048048 | embryonic eye morphogenesis                                                       | 25/7778  | 34/18670  | 0.0001654 | 0.0010585 | 0.000644 |
| BP | GO:0030307 | positive regulation of cell growth                                                | 94/7778  | 169/18670 | 0.0001655 | 0.0010585 | 0.000644 |
| BP | GO:0046474 | glycerophospholipid biosynthetic process                                          | 117/7778 | 217/18670 | 0.0001678 | 0.0010727 | 0.000653 |
| BP | GO:0005996 | monosaccharide metabolic process                                                  | 150/7778 | 287/18670 | 0.0001681 | 0.0010736 | 0.000654 |



|    |            |                                                                       |          |           |           |           |          |
|----|------------|-----------------------------------------------------------------------|----------|-----------|-----------|-----------|----------|
| BP | GO:0051293 | establishment of spindle localization                                 | 30/7778  | 43/18670  | 0.000179  | 0.0011405 | 0.000694 |
| BP | GO:1901985 | positive regulation of protein acetylation                            | 30/7778  | 43/18670  | 0.000179  | 0.0011405 | 0.000694 |
| BP | GO:0010977 | negative regulation of neuron projection development                  | 87/7778  | 155/18670 | 0.0001873 | 0.0011926 | 0.000726 |
| BP | GO:0034728 | nucleosome organization                                               | 101/7778 | 184/18670 | 0.0001895 | 0.0012051 | 0.000734 |
| BP | GO:0034284 | response to monosaccharide                                            | 112/7778 | 207/18670 | 0.0001903 | 0.0012088 | 0.000736 |
| BP | GO:0034508 | centromere complex assembly                                           | 37/7778  | 56/18670  | 0.0001928 | 0.0012203 | 0.000743 |
| BP | GO:0010390 | histone monoubiquitination                                            | 22/7778  | 29/18670  | 0.000193  | 0.0012203 | 0.000743 |
| BP | GO:0033032 | regulation of myeloid cell apoptotic process                          | 22/7778  | 29/18670  | 0.000193  | 0.0012203 | 0.000743 |
| BP | GO:0035666 | TRIF-dependent toll-like receptor signaling pathway                   | 22/7778  | 29/18670  | 0.000193  | 0.0012203 | 0.000743 |
| BP | GO:0070198 | protein localization to chromosome, telomeric region                  | 22/7778  | 29/18670  | 0.000193  | 0.0012203 | 0.000743 |
| BP | GO:0006278 | RNA-dependent DNA biosynthetic process                                | 48/7778  | 77/18670  | 0.000198  | 0.0012493 | 0.000761 |
| BP | GO:0031397 | negative regulation of protein ubiquitination                         | 48/7778  | 77/18670  | 0.000198  | 0.0012493 | 0.000761 |
| BP | GO:0035872 | nucleotide-binding domain, leucine rich repeat containing receptor si | 26/7778  | 36/18670  | 0.000199  | 0.0012544 | 0.000764 |
| BP | GO:0006446 | regulation of translational initiation                                | 49/7778  | 79/18670  | 0.0002036 | 0.0012806 | 0.00078  |
| BP | GO:0042590 | antigen processing and presentation of exogenous peptide antigen v    | 49/7778  | 79/18670  | 0.0002036 | 0.0012806 | 0.00078  |
| BP | GO:0007097 | nuclear migration                                                     | 19/7778  | 24/18670  | 0.0002044 | 0.0012831 | 0.000781 |
| BP | GO:1902914 | regulation of protein polyubiquitination                              | 19/7778  | 24/18670  | 0.0002044 | 0.0012831 | 0.000781 |
| BP | GO:0030033 | microvillus assembly                                                  | 14/7778  | 16/18670  | 0.0002118 | 0.0013275 | 0.000808 |
| BP | GO:0035970 | peptidyl-threonine dephosphorylation                                  | 14/7778  | 16/18670  | 0.0002118 | 0.0013275 | 0.000808 |
| BP | GO:0009749 | response to glucose                                                   | 107/7778 | 197/18670 | 0.000215  | 0.001346  | 0.00082  |
| BP | GO:0050863 | regulation of T cell activation                                       | 162/7778 | 314/18670 | 0.0002177 | 0.0013578 | 0.000827 |
| BP | GO:0042532 | negative regulation of tyrosine phosphorylation of STAT protein       | 12/7778  | 13/18670  | 0.0002177 | 0.0013578 | 0.000827 |
| BP | GO:0043970 | histone H3-K9 acetylation                                             | 12/7778  | 13/18670  | 0.0002177 | 0.0013578 | 0.000827 |
| BP | GO:0090399 | replicative senescence                                                | 12/7778  | 13/18670  | 0.0002177 | 0.0013578 | 0.000827 |
| BP | GO:0034612 | response to tumor necrosis factor                                     | 161/7778 | 312/18670 | 0.0002244 | 0.0013981 | 0.000851 |
| BP | GO:1901654 | response to ketone                                                    | 105/7778 | 193/18670 | 0.0002256 | 0.0014039 | 0.000855 |
| BP | GO:1901655 | cellular response to ketone                                           | 56/7778  | 93/18670  | 0.0002299 | 0.0014299 | 0.000871 |
| BP | GO:1902882 | regulation of response to oxidative stress                            | 58/7778  | 97/18670  | 0.0002338 | 0.0014523 | 0.000884 |
| BP | GO:0001654 | eye development                                                       | 184/7778 | 362/18670 | 0.0002363 | 0.0014664 | 0.000893 |
| BP | GO:0019048 | modulation by virus of host process                                   | 23/7778  | 31/18670  | 0.0002431 | 0.0015044 | 0.000916 |
| BP | GO:0044319 | wound healing, spreading of cells                                     | 23/7778  | 31/18670  | 0.0002431 | 0.0015044 | 0.000916 |
| BP | GO:0090505 | epiboly involved in wound healing                                     | 23/7778  | 31/18670  | 0.0002431 | 0.0015044 | 0.000916 |
| BP | GO:1990090 | cellular response to nerve growth factor stimulus                     | 33/7778  | 49/18670  | 0.0002471 | 0.0015276 | 0.00093  |
| BP | GO:0071356 | cellular response to tumor necrosis factor                            | 151/7778 | 291/18670 | 0.0002483 | 0.0015334 | 0.000934 |
| BP | GO:0021953 | central nervous system neuron differentiation                         | 100/7778 | 183/18670 | 0.0002535 | 0.0015644 | 0.000952 |
| BP | GO:0030902 | hindbrain development                                                 | 85/7778  | 152/18670 | 0.0002609 | 0.0016084 | 0.000979 |
| BP | GO:0009746 | response to hexose                                                    | 109/7778 | 202/18670 | 0.000264  | 0.0016257 | 0.00099  |
| BP | GO:0033866 | nucleoside bisphosphate biosynthetic process                          | 43/7778  | 68/18670  | 0.000266  | 0.0016335 | 0.000995 |
| BP | GO:0034030 | ribonucleoside bisphosphate biosynthetic process                      | 43/7778  | 68/18670  | 0.000266  | 0.0016335 | 0.000995 |
| BP | GO:0034033 | purine nucleoside bisphosphate biosynthetic process                   | 43/7778  | 68/18670  | 0.000266  | 0.0016335 | 0.000995 |
| BP | GO:0033077 | T cell differentiation in thymus                                      | 44/7778  | 70/18670  | 0.0002758 | 0.0016922 | 0.00103  |
| BP | GO:0007020 | microtubule nucleation                                                | 20/7778  | 26/18670  | 0.000277  | 0.0016949 | 0.001032 |
| BP | GO:0031954 | positive regulation of protein autophosphorylation                    | 20/7778  | 26/18670  | 0.000277  | 0.0016949 | 0.001032 |
| BP | GO:0048596 | embryonic camera-type eye morphogenesis                               | 20/7778  | 26/18670  | 0.000277  | 0.0016949 | 0.001032 |
| BP | GO:0046827 | positive regulation of protein export from nucleus                    | 17/7778  | 21/18670  | 0.0002781 | 0.0016983 | 0.001034 |
| BP | GO:2000114 | regulation of establishment of cell polarity                          | 17/7778  | 21/18670  | 0.0002781 | 0.0016983 | 0.001034 |
| BP | GO:0007015 | actin filament organization                                           | 201/7778 | 400/18670 | 0.0002811 | 0.001715  | 0.001044 |
| BP | GO:0000186 | activation of MAPKK activity                                          | 35/7778  | 53/18670  | 0.0002901 | 0.001768  | 0.001076 |
| BP | GO:0060998 | regulation of dendritic spine development                             | 46/7778  | 74/18670  | 0.0002933 | 0.0017857 | 0.001087 |
| BP | GO:0006891 | intra-Golgi vesicle-mediated transport                                | 24/7778  | 33/18670  | 0.0002957 | 0.0017954 | 0.001093 |
| BP | GO:0040001 | establishment of mitotic spindle localization                         | 24/7778  | 33/18670  | 0.0002957 | 0.0017954 | 0.001093 |
| BP | GO:0070536 | protein K63-linked deubiquitination                                   | 24/7778  | 33/18670  | 0.0002957 | 0.0017954 | 0.001093 |
| BP | GO:0007272 | ensheathment of neurons                                               | 76/7778  | 134/18670 | 0.0003007 | 0.0018184 | 0.001107 |
| BP | GO:0008366 | axon ensheathment                                                     | 76/7778  | 134/18670 | 0.0003007 | 0.0018184 | 0.001107 |
| BP | GO:0000380 | alternative mRNA splicing, via spliceosome                            | 47/7778  | 76/18670  | 0.0003009 | 0.0018184 | 0.001107 |
| BP | GO:0050000 | chromosome localization                                               | 47/7778  | 76/18670  | 0.0003009 | 0.0018184 | 0.001107 |
| BP | GO:0060411 | cardiac septum morphogenesis                                          | 47/7778  | 76/18670  | 0.0003009 | 0.0018184 | 0.001107 |
| BP | GO:0090287 | regulation of cellular response to growth factor stimulus             | 151/7778 | 292/18670 | 0.0003045 | 0.0018345 | 0.001117 |
| BP | GO:0042476 | odontogenesis                                                         | 75/7778  | 132/18670 | 0.0003047 | 0.0018345 | 0.001117 |
| BP | GO:0042552 | myelination                                                           | 75/7778  | 132/18670 | 0.0003047 | 0.0018345 | 0.001117 |
| BP | GO:0045598 | regulation of fat cell differentiation                                | 75/7778  | 132/18670 | 0.0003047 | 0.0018345 | 0.001117 |
| BP | GO:0010721 | negative regulation of cell development                               | 175/7778 | 344/18670 | 0.0003133 | 0.0018848 | 0.001148 |
| BP | GO:0043462 | regulation of ATPase activity                                         | 49/7778  | 80/18670  | 0.000314  | 0.0018872 | 0.001149 |
| BP | GO:0048706 | embryonic skeletal system development                                 | 72/7778  | 126/18670 | 0.0003161 | 0.0018978 | 0.001155 |
| BP | GO:0070828 | heterochromatin organization                                          | 51/7778  | 84/18670  | 0.0003244 | 0.001946  | 0.001185 |
| BP | GO:0051310 | metaphase plate congression                                           | 37/7778  | 57/18670  | 0.0003298 | 0.0019761 | 0.001203 |
| BP | GO:0009060 | aerobic respiration                                                   | 53/7778  | 88/18670  | 0.0003322 | 0.0019891 | 0.001211 |
| BP | GO:1903214 | regulation of protein targeting to mitochondrion                      | 30/7778  | 44/18670  | 0.0003387 | 0.0020262 | 0.001234 |
| BP | GO:0060993 | kidney morphogenesis                                                  | 56/7778  | 94/18670  | 0.0003395 | 0.002029  | 0.001235 |
| BP | GO:0048024 | regulation of mRNA splicing, via spliceosome                          | 58/7778  | 98/18670  | 0.0003418 | 0.0020372 | 0.00124  |
| BP | GO:0002504 | antigen processing and presentation of peptide or polysaccharide an   | 60/7778  | 102/18670 | 0.0003421 | 0.0020372 | 0.00124  |
| BP | GO:0035335 | peptidyl-tyrosine dephosphorylation                                   | 60/7778  | 102/18670 | 0.0003421 | 0.0020372 | 0.00124  |
| BP | GO:0002181 | cytoplasmic translation                                               | 59/7778  | 100/18670 | 0.0003422 | 0.0020372 | 0.00124  |
| BP | GO:0021700 | developmental maturation                                              | 147/7778 | 284/18670 | 0.0003439 | 0.0020457 | 0.001245 |
| BP | GO:0032801 | receptor catabolic process                                            | 25/7778  | 35/18670  | 0.0003497 | 0.0020765 | 0.001264 |
| BP | GO:0070423 | nucleotide-binding oligomerization domain containing signaling pathw  | 25/7778  | 35/18670  | 0.0003497 | 0.0020765 | 0.001264 |
| BP | GO:0010038 | response to metal ion                                                 | 183/7778 | 362/18670 | 0.0003501 | 0.0020777 | 0.001265 |
| BP | GO:0003180 | aortic valve morphogenesis                                            | 21/7778  | 28/18670  | 0.0003559 | 0.0021093 | 0.001284 |
| BP | GO:0031032 | actomyosin structure organization                                     | 107/7778 | 199/18670 | 0.0003564 | 0.0021102 | 0.001285 |
| BP | GO:0050768 | negative regulation of neurogenesis                                   | 152/7778 | 295/18670 | 0.0003609 | 0.0021347 | 0.0013   |
| BP | GO:0070200 | establishment of protein localization to telomere                     | 15/7778  | 18/18670  | 0.0003647 | 0.0021543 | 0.001312 |
| BP | GO:0046879 | hormone secretion                                                     | 158/7778 | 308/18670 | 0.0003648 | 0.0021543 | 0.001312 |
| BP | GO:0010952 | positive regulation of peptidase activity                             | 106/7778 | 197/18670 | 0.0003657 | 0.0021576 | 0.001314 |
| BP | GO:0070972 | protein localization to endoplasmic reticulum                         | 82/7778  | 147/18670 | 0.0003693 | 0.0021768 | 0.001325 |
| BP | GO:0009152 | purine ribonucleotide biosynthetic process                            | 94/7778  | 172/18670 | 0.0003798 | 0.0022367 | 0.001362 |
| BP | GO:0006893 | Golgi to plasma membrane transport                                    | 40/7778  | 63/18670  | 0.0003814 | 0.002242  | 0.001365 |
| BP | GO:0007062 | sister chromatid cohesion                                             | 40/7778  | 63/18670  | 0.0003814 | 0.002242  | 0.001365 |
| BP | GO:0110053 | regulation of actin filament organization                             | 136/7778 | 261/18670 | 0.0003896 | 0.0022877 | 0.001393 |
| BP | GO:0000715 | nucleotide-excision repair, DNA damage recognition                    | 18/7778  | 23/18670  | 0.0003927 | 0.0023021 | 0.001402 |
| BP | GO:0007064 | mitotic sister chromatid cohesion                                     | 18/7778  | 23/18670  | 0.0003927 | 0.0023021 | 0.001402 |
| BP | GO:0045580 | regulation of T cell differentiation                                  | 78/7778  | 139/18670 | 0.0003963 | 0.0023207 | 0.001413 |
| BP | GO:1990138 | neuron projection extension                                           | 92/7778  | 168/18670 | 0.0003976 | 0.0023263 | 0.001416 |

|    |            |                                                                               |          |           |           |           |          |
|----|------------|-------------------------------------------------------------------------------|----------|-----------|-----------|-----------|----------|
| BP | GO:0007599 | hemostasis                                                                    | 173/7778 | 341/18670 | 0.0004009 | 0.0023433 | 0.001427 |
| BP | GO:0003156 | regulation of animal organ formation                                          | 26/7778  | 37/18670  | 0.0004043 | 0.0023525 | 0.001432 |
| BP | GO:0006270 | DNA replication initiation                                                    | 26/7778  | 37/18670  | 0.0004043 | 0.0023525 | 0.001432 |
| BP | GO:0032885 | regulation of polysaccharide biosynthetic process                             | 26/7778  | 37/18670  | 0.0004043 | 0.0023525 | 0.001432 |
| BP | GO:0051084 | 'de novo' posttranslational protein folding                                   | 26/7778  | 37/18670  | 0.0004043 | 0.0023525 | 0.001432 |
| BP | GO:0060236 | regulation of mitotic spindle organization                                    | 26/7778  | 37/18670  | 0.0004043 | 0.0023525 | 0.001432 |
| BP | GO:0032648 | regulation of interferon-beta production                                      | 32/7778  | 48/18670  | 0.0004055 | 0.0023535 | 0.001433 |
| BP | GO:0060324 | face development                                                              | 32/7778  | 48/18670  | 0.0004055 | 0.0023535 | 0.001433 |
| BP | GO:0090199 | regulation of release of cytochrome c from mitochondria                       | 32/7778  | 48/18670  | 0.0004055 | 0.0023535 | 0.001433 |
| BP | GO:0033500 | carbohydrate homeostasis                                                      | 127/7778 | 242/18670 | 0.00041   | 0.0023764 | 0.001447 |
| BP | GO:0043967 | histone H4 acetylation                                                        | 42/7778  | 67/18670  | 0.0004102 | 0.0023764 | 0.001447 |
| BP | GO:0045216 | cell-cell junction organization                                               | 100/7778 | 185/18670 | 0.0004262 | 0.0024669 | 0.001502 |
| BP | GO:0003206 | cardiac chamber morphogenesis                                                 | 73/7778  | 129/18670 | 0.0004286 | 0.002476  | 0.001507 |
| BP | GO:0018022 | peptidyl-lysine methylation                                                   | 73/7778  | 129/18670 | 0.0004286 | 0.002476  | 0.001507 |
| BP | GO:0032608 | interferon-beta production                                                    | 33/7778  | 50/18670  | 0.0004371 | 0.0025206 | 0.001535 |
| BP | GO:0043489 | RNA stabilization                                                             | 33/7778  | 50/18670  | 0.0004371 | 0.0025206 | 0.001535 |
| BP | GO:0010586 | miRNA metabolic process                                                       | 22/7778  | 30/18670  | 0.0004387 | 0.0025257 | 0.001538 |
| BP | GO:0050690 | regulation of defense response to virus by virus                              | 22/7778  | 30/18670  | 0.0004387 | 0.0025257 | 0.001538 |
| BP | GO:0006491 | N-glycan processing                                                           | 13/7778  | 15/18670  | 0.0004483 | 0.0025695 | 0.001564 |
| BP | GO:0042921 | glucocorticoid receptor signaling pathway                                     | 13/7778  | 15/18670  | 0.0004483 | 0.0025695 | 0.001564 |
| BP | GO:0043518 | negative regulation of DNA damage response, signal transduction by            | 13/7778  | 15/18670  | 0.0004483 | 0.0025695 | 0.001564 |
| BP | GO:0060766 | negative regulation of androgen receptor signaling pathway                    | 13/7778  | 15/18670  | 0.0004483 | 0.0025695 | 0.001564 |
| BP | GO:1902969 | mitotic DNA replication                                                       | 13/7778  | 15/18670  | 0.0004483 | 0.0025695 | 0.001564 |
| BP | GO:0002479 | antigen processing and presentation of exogenous peptide antigen v46/7778     | 46/7778  | 75/18670  | 0.000454  | 0.0025925 | 0.001578 |
| BP | GO:0032482 | Rab protein signal transduction                                               | 46/7778  | 75/18670  | 0.000454  | 0.0025925 | 0.001578 |
| BP | GO:0051303 | establishment of chromosome localization                                      | 46/7778  | 75/18670  | 0.000454  | 0.0025925 | 0.001578 |
| BP | GO:1903201 | regulation of oxidative stress-induced cell death                             | 46/7778  | 75/18670  | 0.000454  | 0.0025925 | 0.001578 |
| BP | GO:0050775 | positive regulation of dendrite morphogenesis                                 | 27/7778  | 39/18670  | 0.0004584 | 0.0026111 | 0.00159  |
| BP | GO:1902042 | negative regulation of extrinsic apoptotic signaling pathway via death27/7778 | 27/7778  | 39/18670  | 0.0004584 | 0.0026111 | 0.00159  |
| BP | GO:1904591 | positive regulation of protein import                                         | 27/7778  | 39/18670  | 0.0004584 | 0.0026111 | 0.00159  |
| BP | GO:0048588 | developmental cell growth                                                     | 123/7778 | 234/18670 | 0.0004607 | 0.0026217 | 0.001596 |
| BP | GO:0043666 | regulation of phosphoprotein phosphatase activity                             | 67/7778  | 117/18670 | 0.0004625 | 0.0026296 | 0.001601 |
| BP | GO:0031529 | ruffle organization                                                           | 34/7778  | 52/18670  | 0.0004671 | 0.0026511 | 0.001614 |
| BP | GO:1900024 | regulation of substrate adhesion-dependent cell spreading                     | 34/7778  | 52/18670  | 0.0004671 | 0.0026511 | 0.001614 |
| BP | GO:0016126 | sterol biosynthetic process                                                   | 49/7778  | 81/18670  | 0.0004754 | 0.0026959 | 0.001641 |
| BP | GO:0097237 | cellular response to toxic substance                                          | 129/7778 | 247/18670 | 0.0004799 | 0.0027193 | 0.001656 |
| BP | GO:2000106 | regulation of leukocyte apoptotic process                                     | 50/7778  | 83/18670  | 0.0004806 | 0.0027205 | 0.001656 |
| BP | GO:0150063 | visual system development                                                     | 184/7778 | 366/18670 | 0.0004818 | 0.0027233 | 0.001658 |
| BP | GO:0061351 | neural precursor cell proliferation                                           | 83/7778  | 150/18670 | 0.0004828 | 0.0027233 | 0.001658 |
| BP | GO:0014031 | mesenchymal cell development                                                  | 51/7778  | 85/18670  | 0.0004848 | 0.0027233 | 0.001658 |
| BP | GO:0006983 | ER overload response                                                          | 11/7778  | 12/18670  | 0.0004849 | 0.0027233 | 0.001658 |
| BP | GO:0010826 | negative regulation of centrosome duplication                                 | 11/7778  | 12/18670  | 0.0004849 | 0.0027233 | 0.001658 |
| BP | GO:0035330 | regulation of hippo signaling                                                 | 11/7778  | 12/18670  | 0.0004849 | 0.0027233 | 0.001658 |
| BP | GO:0060213 | positive regulation of nuclear-transcribed mRNA poly(A) tail shortenin11/7778 | 11/7778  | 12/18670  | 0.0004849 | 0.0027233 | 0.001658 |
| BP | GO:0071888 | macrophage apoptotic process                                                  | 11/7778  | 12/18670  | 0.0004849 | 0.0027233 | 0.001658 |
| BP | GO:1903894 | regulation of IRE1-mediated unfolded protein response                         | 11/7778  | 12/18670  | 0.0004849 | 0.0027233 | 0.001658 |
| BP | GO:0014068 | positive regulation of phosphatidylinositol 3-kinase signaling                | 52/7778  | 87/18670  | 0.0004882 | 0.0027397 | 0.001668 |
| BP | GO:0006497 | protein lipidation                                                            | 53/7778  | 89/18670  | 0.0004908 | 0.0027507 | 0.001675 |
| BP | GO:0002495 | antigen processing and presentation of peptide antigen via MHC clas59/7778    | 59/7778  | 101/18670 | 0.000491  | 0.0027507 | 0.001675 |
| BP | GO:0070301 | cellular response to hydrogen peroxide                                        | 58/7778  | 99/18670  | 0.0004926 | 0.0027515 | 0.001675 |
| BP | GO:0062207 | regulation of pattern recognition receptor signaling pathway                  | 55/7778  | 93/18670  | 0.0004936 | 0.0027515 | 0.001675 |
| BP | GO:0072080 | nephron tubule development                                                    | 55/7778  | 93/18670  | 0.0004936 | 0.0027515 | 0.001675 |
| BP | GO:0050810 | regulation of steroid biosynthetic process                                    | 56/7778  | 95/18670  | 0.0004939 | 0.0027515 | 0.001675 |
| BP | GO:0061326 | renal tubule development                                                      | 56/7778  | 95/18670  | 0.0004939 | 0.0027515 | 0.001675 |
| BP | GO:1903076 | regulation of protein localization to plasma membrane                         | 56/7778  | 95/18670  | 0.0004939 | 0.0027515 | 0.001675 |
| BP | GO:0035384 | thioester biosynthetic process                                                | 35/7778  | 54/18670  | 0.0004955 | 0.0027515 | 0.001675 |
| BP | GO:0043392 | negative regulation of DNA binding                                            | 35/7778  | 54/18670  | 0.0004955 | 0.0027515 | 0.001675 |
| BP | GO:0071616 | acyl-CoA biosynthetic process                                                 | 35/7778  | 54/18670  | 0.0004955 | 0.0027515 | 0.001675 |
| BP | GO:0090329 | regulation of DNA-dependent DNA replication                                   | 35/7778  | 54/18670  | 0.0004955 | 0.0027515 | 0.001675 |
| BP | GO:0048562 | embryonic organ morphogenesis                                                 | 148/7778 | 288/18670 | 0.0004973 | 0.0027594 | 0.00168  |
| BP | GO:0009108 | coenzyme biosynthetic process                                                 | 81/7778  | 146/18670 | 0.0005026 | 0.0027864 | 0.001696 |
| BP | GO:0097178 | ruffle assembly                                                               | 28/7778  | 41/18670  | 0.0005115 | 0.0028334 | 0.001725 |
| BP | GO:0033522 | histone H2A ubiquitination                                                    | 19/7778  | 25/18670  | 0.000518  | 0.0028568 | 0.001739 |
| BP | GO:0044068 | modulation by symbiont of host cellular process                               | 19/7778  | 25/18670  | 0.000518  | 0.0028568 | 0.001739 |
| BP | GO:0060330 | regulation of response to interferon-gamma                                    | 19/7778  | 25/18670  | 0.000518  | 0.0028568 | 0.001739 |
| BP | GO:0060334 | regulation of interferon-gamma-mediated signaling pathway                     | 19/7778  | 25/18670  | 0.000518  | 0.0028568 | 0.001739 |
| BP | GO:0072012 | glomerulus vasculature development                                            | 19/7778  | 25/18670  | 0.000518  | 0.0028568 | 0.001739 |
| BP | GO:0060538 | skeletal muscle organ development                                             | 92/7778  | 169/18670 | 0.0005186 | 0.002858  | 0.00174  |
| BP | GO:0090183 | regulation of kidney development                                              | 36/7778  | 56/18670  | 0.0005221 | 0.0028746 | 0.00175  |
| BP | GO:0003176 | aortic valve development                                                      | 23/7778  | 32/18670  | 0.0005235 | 0.0028774 | 0.001752 |
| BP | GO:0090504 | epiboly                                                                       | 23/7778  | 32/18670  | 0.0005235 | 0.0028774 | 0.001752 |
| BP | GO:0042593 | glucose homeostasis                                                           | 126/7778 | 241/18670 | 0.0005246 | 0.0028813 | 0.001754 |
| BP | GO:0033209 | tumor necrosis factor-mediated signaling pathway                              | 91/7778  | 167/18670 | 0.0005311 | 0.0029143 | 0.001774 |
| BP | GO:0048880 | sensory system development                                                    | 186/7778 | 371/18670 | 0.0005367 | 0.0029425 | 0.001791 |
| BP | GO:0042276 | error-prone translesion synthesis                                             | 16/7778  | 20/18670  | 0.0005463 | 0.0029781 | 0.001813 |
| BP | GO:0046823 | negative regulation of nucleocytoplasmic transport                            | 16/7778  | 20/18670  | 0.0005463 | 0.0029781 | 0.001813 |
| BP | GO:0046931 | pore complex assembly                                                         | 16/7778  | 20/18670  | 0.0005463 | 0.0029781 | 0.001813 |
| BP | GO:1900151 | regulation of nuclear-transcribed mRNA catabolic process, deadenyl16/7778     | 16/7778  | 20/18670  | 0.0005463 | 0.0029781 | 0.001813 |
| BP | GO:1902236 | negative regulation of endoplasmic reticulum stress-induced intrinsic16/7778  | 16/7778  | 20/18670  | 0.0005463 | 0.0029781 | 0.001813 |
| BP | GO:1903204 | negative regulation of oxidative stress-induced neuron death16/7778           | 16/7778  | 20/18670  | 0.0005463 | 0.0029781 | 0.001813 |
| BP | GO:0030100 | regulation of endocytosis                                                     | 109/7778 | 205/18670 | 0.0005465 | 0.0029781 | 0.001813 |
| BP | GO:0060997 | dendritic spine morphogenesis                                                 | 37/7778  | 58/18670  | 0.0005469 | 0.0029781 | 0.001813 |
| BP | GO:0007266 | Rho protein signal transduction                                               | 108/7778 | 203/18670 | 0.0005519 | 0.0030555 | 0.00186  |
| BP | GO:0021762 | substantia nigra development                                                  | 29/7778  | 43/18670  | 0.0005563 | 0.0030555 | 0.00186  |
| BP | GO:0030866 | cortical actin cytoskeleton organization                                      | 29/7778  | 43/18670  | 0.0005563 | 0.0030555 | 0.00186  |
| BP | GO:0045773 | positive regulation of axon extension                                         | 29/7778  | 43/18670  | 0.0005563 | 0.0030555 | 0.00186  |
| BP | GO:0051146 | striated muscle cell differentiation                                          | 150/7778 | 293/18670 | 0.0005674 | 0.003077  | 0.001873 |
| BP | GO:0032271 | regulation of protein polymerization                                          | 115/7778 | 218/18670 | 0.0005805 | 0.0031453 | 0.001915 |
| BP | GO:0034660 | ncRNA metabolic process                                                       | 233/7778 | 475/18670 | 0.0005878 | 0.0031819 | 0.001937 |
| BP | GO:0018108 | peptidyl-tyrosine phosphorylation                                             | 182/7778 | 363/18670 | 0.0006094 | 0.0032948 | 0.002006 |
| BP | GO:0045669 | positive regulation of osteoblast differentiation                             | 40/7778  | 64/18670  | 0.0006102 | 0.0032948 | 0.002006 |
| BP | GO:0048645 | animal organ formation                                                        | 40/7778  | 64/18670  | 0.0006102 | 0.0032948 | 0.002006 |

|    |            |                                                                                   |          |           |           |           |          |
|----|------------|-----------------------------------------------------------------------------------|----------|-----------|-----------|-----------|----------|
| BP | GO:0009101 | glycoprotein biosynthetic process                                                 | 175/7778 | 348/18670 | 0.0006412 | 0.0034593 | 0.002106 |
| BP | GO:2000144 | positive regulation of DNA-templated transcription, initiation                    | 20/7778  | 27/18670  | 0.0006495 | 0.0035011 | 0.002132 |
| BP | GO:0018198 | peptidyl-cysteine modification                                                    | 31/7778  | 47/18670  | 0.0006594 | 0.0035446 | 0.002159 |
| BP | GO:0031952 | regulation of protein autophosphorylation                                         | 31/7778  | 47/18670  | 0.0006594 | 0.0035446 | 0.002159 |
| BP | GO:0045646 | regulation of erythrocyte differentiation                                         | 31/7778  | 47/18670  | 0.0006594 | 0.0035446 | 0.002159 |
| BP | GO:0006354 | DNA-templated transcription, elongation                                           | 64/7778  | 112/18670 | 0.0006626 | 0.0035598 | 0.002167 |
| BP | GO:1903051 | negative regulation of proteolysis involved in cellular protein catabolism        | 44/7778  | 72/18670  | 0.0006691 | 0.0035922 | 0.002187 |
| BP | GO:0072088 | nephron epithelium morphogenesis                                                  | 46/7778  | 76/18670  | 0.0006886 | 0.0036906 | 0.002247 |
| BP | GO:1902653 | secondary alcohol biosynthetic process                                            | 46/7778  | 76/18670  | 0.0006886 | 0.0036906 | 0.002247 |
| BP | GO:1901099 | negative regulation of signal transduction in absence of ligand                   | 25/7778  | 36/18670  | 0.0006923 | 0.0037043 | 0.002255 |
| BP | GO:2001240 | negative regulation of extrinsic apoptotic signaling pathway in absence of ligand | 25/7778  | 36/18670  | 0.0006923 | 0.0037043 | 0.002255 |
| BP | GO:0002367 | cytokine production involved in immune response                                   | 59/7778  | 102/18670 | 0.0006954 | 0.003712  | 0.00226  |
| BP | GO:0031016 | pancreas development                                                              | 47/7778  | 78/18670  | 0.0006961 | 0.003712  | 0.00226  |
| BP | GO:0061333 | renal tubule morphogenesis                                                        | 47/7778  | 78/18670  | 0.0006961 | 0.003712  | 0.00226  |
| BP | GO:0072028 | nephron morphogenesis                                                             | 47/7778  | 78/18670  | 0.0006961 | 0.003712  | 0.00226  |
| BP | GO:0018212 | peptidyl-tyrosine modification                                                    | 183/7778 | 366/18670 | 0.0006989 | 0.0037241 | 0.002267 |
| BP | GO:0034260 | negative regulation of GTPase activity                                            | 32/7778  | 49/18670  | 0.0007038 | 0.0037416 | 0.002278 |
| BP | GO:0001824 | blastocyst development                                                            | 57/7778  | 98/18670  | 0.0007045 | 0.0037416 | 0.002278 |
| BP | GO:0030038 | contractile actin filament bundle assembly                                        | 57/7778  | 98/18670  | 0.0007045 | 0.0037416 | 0.002278 |
| BP | GO:0043149 | stress fiber assembly                                                             | 57/7778  | 98/18670  | 0.0007045 | 0.0037416 | 0.002278 |
| BP | GO:0097581 | lamellipodium organization                                                        | 49/7778  | 82/18670  | 0.0007068 | 0.0037506 | 0.002283 |
| BP | GO:0006303 | double-strand break repair via nonhomologous end joining                          | 51/7778  | 86/18670  | 0.0007124 | 0.003771  | 0.002296 |
| BP | GO:1903363 | negative regulation of cellular protein catabolic process                         | 51/7778  | 86/18670  | 0.0007124 | 0.003771  | 0.002296 |
| BP | GO:0042147 | retrograde transport, endosome to Golgi                                           | 52/7778  | 88/18670  | 0.0007135 | 0.003771  | 0.002296 |
| BP | GO:1900407 | regulation of cellular response to oxidative stress                               | 52/7778  | 88/18670  | 0.0007135 | 0.003771  | 0.002296 |
| BP | GO:0001656 | metanephros development                                                           | 53/7778  | 90/18670  | 0.0007136 | 0.003771  | 0.002296 |
| BP | GO:0009100 | glycoprotein metabolic process                                                    | 207/7778 | 419/18670 | 0.0007293 | 0.0038509 | 0.002345 |
| BP | GO:0002833 | positive regulation of response to biotic stimulus                                | 129/7778 | 249/18670 | 0.0007299 | 0.0038509 | 0.002345 |
| BP | GO:0015693 | magnesium ion transport                                                           | 14/7778  | 17/18670  | 0.0007369 | 0.003875  | 0.002359 |
| BP | GO:0033262 | regulation of nuclear cell cycle DNA replication                                  | 14/7778  | 17/18670  | 0.0007369 | 0.003875  | 0.002359 |
| BP | GO:0034501 | protein localization to kinetochore                                               | 14/7778  | 17/18670  | 0.0007369 | 0.003875  | 0.002359 |
| BP | GO:0060644 | mammary gland epithelial cell differentiation                                     | 14/7778  | 17/18670  | 0.0007369 | 0.003875  | 0.002359 |
| BP | GO:0038061 | NIK/NF-kappaB signaling                                                           | 98/7778  | 183/18670 | 0.0007378 | 0.0038767 | 0.00236  |
| BP | GO:0000423 | mitophagy                                                                         | 17/7778  | 22/18670  | 0.000747  | 0.0039059 | 0.002378 |
| BP | GO:0001759 | organ induction                                                                   | 17/7778  | 22/18670  | 0.000747  | 0.0039059 | 0.002378 |
| BP | GO:0010869 | regulation of receptor biosynthetic process                                       | 17/7778  | 22/18670  | 0.000747  | 0.0039059 | 0.002378 |
| BP | GO:0032469 | endoplasmic reticulum calcium ion homeostasis                                     | 17/7778  | 22/18670  | 0.000747  | 0.0039059 | 0.002378 |
| BP | GO:0032727 | positive regulation of interferon-alpha production                                | 17/7778  | 22/18670  | 0.000747  | 0.0039059 | 0.002378 |
| BP | GO:1901522 | positive regulation of transcription from RNA polymerase II promoter              | 17/7778  | 22/18670  | 0.000747  | 0.0039059 | 0.002378 |
| BP | GO:0097352 | autophagosome maturation                                                          | 26/7778  | 38/18670  | 0.0007738 | 0.004043  | 0.002461 |
| BP | GO:0007596 | blood coagulation                                                                 | 169/7778 | 336/18670 | 0.0007759 | 0.0040503 | 0.002466 |
| BP | GO:0052126 | movement in host environment                                                      | 86/7778  | 158/18670 | 0.0007786 | 0.0040615 | 0.002473 |
| BP | GO:0000132 | establishment of mitotic spindle orientation                                      | 21/7778  | 29/18670  | 0.0007835 | 0.0040654 | 0.002475 |
| BP | GO:0030511 | positive regulation of transforming growth factor beta receptor signaling         | 21/7778  | 29/18670  | 0.0007835 | 0.0040654 | 0.002475 |
| BP | GO:0031114 | regulation of microtubule depolymerization                                        | 21/7778  | 29/18670  | 0.0007835 | 0.0040654 | 0.002475 |
| BP | GO:1903846 | positive regulation of cellular response to transforming growth factor            | 21/7778  | 29/18670  | 0.0007835 | 0.0040654 | 0.002475 |
| BP | GO:0036297 | interstrand cross-link repair                                                     | 34/7778  | 53/18670  | 0.0007838 | 0.0040654 | 0.002475 |
| BP | GO:0045840 | positive regulation of mitotic nuclear division                                   | 34/7778  | 53/18670  | 0.0007838 | 0.0040654 | 0.002475 |
| BP | GO:0050732 | negative regulation of peptidyl-tyrosine phosphorylation                          | 34/7778  | 53/18670  | 0.0007838 | 0.0040654 | 0.002475 |
| BP | GO:0099003 | vesicle-mediated transport in synapse                                             | 112/7778 | 213/18670 | 0.000792  | 0.0041047 | 0.002499 |
| BP | GO:0072593 | reactive oxygen species metabolic process                                         | 145/7778 | 284/18670 | 0.0008031 | 0.0041586 | 0.002532 |
| BP | GO:0045727 | positive regulation of translation                                                | 71/7778  | 127/18670 | 0.0008128 | 0.0042055 | 0.00256  |
| BP | GO:0031929 | TOR signaling                                                                     | 70/7778  | 125/18670 | 0.0008274 | 0.0042778 | 0.002604 |
| BP | GO:0001678 | cellular glucose homeostasis                                                      | 83/7778  | 152/18670 | 0.0008361 | 0.0043194 | 0.00263  |
| BP | GO:0006734 | NADH metabolic process                                                            | 27/7778  | 40/18670  | 0.0008521 | 0.004395  | 0.002676 |
| BP | GO:0061462 | protein localization to lysosome                                                  | 27/7778  | 40/18670  | 0.0008521 | 0.004395  | 0.002676 |
| BP | GO:0071774 | response to fibroblast growth factor                                              | 82/7778  | 150/18670 | 0.0008559 | 0.0044095 | 0.002685 |
| BP | GO:0001704 | formation of primary germ layer                                                   | 68/7778  | 121/18670 | 0.0008563 | 0.0044095 | 0.002685 |
| BP | GO:0044706 | multi-multicellular organism process                                              | 116/7778 | 222/18670 | 0.0008758 | 0.0045066 | 0.002744 |
| BP | GO:1902369 | negative regulation of RNA catabolic process                                      | 37/7778  | 59/18670  | 0.0008813 | 0.0045308 | 0.002758 |
| BP | GO:0022904 | respiratory electron transport chain                                              | 66/7778  | 117/18670 | 0.0008845 | 0.0045438 | 0.002766 |
| BP | GO:0072522 | purine-containing compound biosynthetic process                                   | 108/7778 | 205/18670 | 0.0008897 | 0.0045669 | 0.00278  |
| BP | GO:0035051 | cardiocyte differentiation                                                        | 90/7778  | 167/18670 | 0.0009109 | 0.0046719 | 0.002844 |
| BP | GO:0046620 | regulation of organ growth                                                        | 64/7778  | 113/18670 | 0.0009116 | 0.0046719 | 0.002844 |
| BP | GO:0022900 | electron transport chain                                                          | 99/7778  | 186/18670 | 0.0009125 | 0.0046728 | 0.002845 |
| BP | GO:0010762 | regulation of fibroblast migration                                                | 22/7778  | 31/18670  | 0.0009169 | 0.004688  | 0.002854 |
| BP | GO:0071539 | protein localization to centrosome                                                | 22/7778  | 31/18670  | 0.0009169 | 0.004688  | 0.002854 |
| BP | GO:0044088 | regulation of vacuole organization                                                | 28/7778  | 42/18670  | 0.0009265 | 0.0047334 | 0.002882 |
| BP | GO:0009141 | nucleoside triphosphate metabolic process                                         | 62/7778  | 109/18670 | 0.0009373 | 0.0047789 | 0.00291  |
| BP | GO:0072009 | nephron epithelium development                                                    | 62/7778  | 109/18670 | 0.0009373 | 0.0047789 | 0.00291  |
| BP | GO:0036092 | phosphatidylinositol-3-phosphate biosynthetic process                             | 12/7778  | 14/18670  | 0.0009407 | 0.0047789 | 0.00291  |
| BP | GO:0071428 | rRNA-containing ribonucleoprotein complex export from nucleus                     | 12/7778  | 14/18670  | 0.0009407 | 0.0047789 | 0.00291  |
| BP | GO:0090231 | regulation of spindle checkpoint                                                  | 12/7778  | 14/18670  | 0.0009407 | 0.0047789 | 0.00291  |
| BP | GO:0090266 | regulation of mitotic cell cycle spindle assembly checkpoint                      | 12/7778  | 14/18670  | 0.0009407 | 0.0047789 | 0.00291  |
| BP | GO:1903504 | regulation of mitotic spindle checkpoint                                          | 12/7778  | 14/18670  | 0.0009407 | 0.0047789 | 0.00291  |
| BP | GO:0098781 | ncRNA transcription                                                               | 61/7778  | 107/18670 | 0.0009495 | 0.0048198 | 0.002934 |
| BP | GO:0000381 | regulation of alternative mRNA splicing, via spliceosome                          | 40/7778  | 65/18670  | 0.0009522 | 0.00483   | 0.002941 |
| BP | GO:0001783 | B cell apoptotic process                                                          | 18/7778  | 24/18670  | 0.0009579 | 0.0048475 | 0.002951 |
| BP | GO:0032878 | regulation of establishment or maintenance of cell polarity                       | 18/7778  | 24/18670  | 0.0009579 | 0.0048475 | 0.002951 |
| BP | GO:0099563 | modification of synaptic structure                                                | 18/7778  | 24/18670  | 0.0009579 | 0.0048475 | 0.002951 |
| BP | GO:0000018 | regulation of DNA recombination                                                   | 58/7778  | 101/18670 | 0.0009825 | 0.0049682 | 0.003025 |
| BP | GO:0070227 | lymphocyte apoptotic process                                                      | 42/7778  | 69/18670  | 0.0009859 | 0.0049809 | 0.003033 |
| BP | GO:0045089 | positive regulation of innate immune response                                     | 112/7778 | 214/18670 | 0.0009866 | 0.0049809 | 0.003033 |
| BP | GO:0010463 | mesenchymal cell proliferation                                                    | 29/7778  | 44/18670  | 0.0009966 | 0.0050118 | 0.003051 |
| BP | GO:0018023 | peptidyl-lysine trimethylation                                                    | 29/7778  | 44/18670  | 0.0009966 | 0.0050118 | 0.003051 |
| BP | GO:0060412 | ventricular septum morphogenesis                                                  | 29/7778  | 44/18670  | 0.0009966 | 0.0050118 | 0.003051 |
| BP | GO:0061001 | regulation of dendritic spine morphogenesis                                       | 29/7778  | 44/18670  | 0.0009966 | 0.0050118 | 0.003051 |
| BP | GO:0090311 | regulation of protein deacetylation                                               | 29/7778  | 44/18670  | 0.0009966 | 0.0050118 | 0.003051 |
| BP | GO:0120162 | positive regulation of cold-induced thermogenesis                                 | 56/7778  | 97/18670  | 0.001001  | 0.0050301 | 0.003062 |
| BP | GO:0110020 | regulation of actomyosin structure organization                                   | 55/7778  | 95/18670  | 0.001009  | 0.0050618 | 0.003082 |
| BP | GO:0031100 | animal organ regeneration                                                         | 44/7778  | 73/18670  | 0.0010097 | 0.0050618 | 0.003082 |
| BP | GO:0050688 | regulation of defense response to virus                                           | 44/7778  | 73/18670  | 0.0010097 | 0.0050618 | 0.003082 |

|    |            |                                                                          |          |           |           |           |          |
|----|------------|--------------------------------------------------------------------------|----------|-----------|-----------|-----------|----------|
| BP | GO:1901184 | regulation of ERBB signaling pathway                                     | 54/7778  | 93/18670  | 0.001016  | 0.0050892 | 0.003099 |
| BP | GO:0006695 | cholesterol biosynthetic process                                         | 45/7778  | 75/18670  | 0.0010182 | 0.0050967 | 0.003103 |
| BP | GO:0045638 | negative regulation of myeloid cell differentiation                      | 53/7778  | 91/18670  | 0.0010219 | 0.0051109 | 0.003112 |
| BP | GO:0022409 | positive regulation of cell-cell adhesion                                | 131/7778 | 255/18670 | 0.0010258 | 0.0051265 | 0.003121 |
| BP | GO:0061053 | somite development                                                       | 52/7778  | 89/18670  | 0.0010266 | 0.0051267 | 0.003121 |
| BP | GO:1903312 | negative regulation of mRNA metabolic process                            | 47/7778  | 79/18670  | 0.0010292 | 0.0051356 | 0.003127 |
| BP | GO:0048864 | stem cell development                                                    | 50/7778  | 85/18670  | 0.0010322 | 0.0051466 | 0.003133 |
| BP | GO:0061572 | actin filament bundle organization                                       | 85/7778  | 157/18670 | 0.0010348 | 0.0051557 | 0.003139 |
| BP | GO:0051897 | positive regulation of protein kinase B signaling                        | 94/7778  | 176/18670 | 0.0010471 | 0.005213  | 0.003174 |
| BP | GO:1903707 | negative regulation of hemopoiesis                                       | 84/7778  | 155/18670 | 0.0010611 | 0.0052706 | 0.003209 |
| BP | GO:0016082 | synaptic vesicle priming                                                 | 15/7778  | 19/18670  | 0.0010618 | 0.0052706 | 0.003209 |
| BP | GO:1903798 | regulation of production of miRNAs involved in gene silencing by miF     | 15/7778  | 19/18670  | 0.0010618 | 0.0052706 | 0.003209 |
| BP | GO:0031648 | protein destabilization                                                  | 30/7778  | 46/18670  | 0.001062  | 0.0052706 | 0.003209 |
| BP | GO:0034470 | ncRNA processing                                                         | 190/7778 | 384/18670 | 0.0010703 | 0.0053054 | 0.00323  |
| BP | GO:0002328 | pro-B cell differentiation                                               | 10/7778  | 11/18670  | 0.0010731 | 0.0053054 | 0.00323  |
| BP | GO:0009113 | purine nucleobase biosynthetic process                                   | 10/7778  | 11/18670  | 0.0010731 | 0.0053054 | 0.00323  |
| BP | GO:0042023 | DNA endoreduplication                                                    | 10/7778  | 11/18670  | 0.0010731 | 0.0053054 | 0.00323  |
| BP | GO:2000615 | regulation of histone H3-K9 acetylation                                  | 10/7778  | 11/18670  | 0.0010731 | 0.0053054 | 0.00323  |
| BP | GO:0051017 | actin filament bundle assembly                                           | 83/7778  | 153/18670 | 0.0010878 | 0.0053739 | 0.003272 |
| BP | GO:0002683 | negative regulation of immune system process                             | 213/7778 | 435/18670 | 0.0011035 | 0.0054474 | 0.003317 |
| BP | GO:0030850 | prostate gland development                                               | 31/7778  | 48/18670  | 0.0011224 | 0.0055323 | 0.003368 |
| BP | GO:0031055 | chromatin remodeling at centromere                                       | 31/7778  | 48/18670  | 0.0011224 | 0.0055323 | 0.003368 |
| BP | GO:0021537 | telencephalon development                                                | 128/7778 | 249/18670 | 0.0011262 | 0.0055466 | 0.003377 |
| BP | GO:0071772 | response to BMP                                                          | 91/7778  | 170/18670 | 0.001136  | 0.0055864 | 0.003401 |
| BP | GO:0071773 | cellular response to BMP stimulus                                        | 91/7778  | 170/18670 | 0.001136  | 0.0055864 | 0.003401 |
| BP | GO:1902905 | positive regulation of supramolecular fiber organization                 | 107/7778 | 204/18670 | 0.0011441 | 0.0056221 | 0.003423 |
| BP | GO:0022011 | myelination in peripheral nervous system                                 | 19/7778  | 26/18670  | 0.0011719 | 0.005714  | 0.003479 |
| BP | GO:0032292 | peripheral nervous system axon ensheathment                              | 19/7778  | 26/18670  | 0.0011719 | 0.005714  | 0.003479 |
| BP | GO:0032800 | receptor biosynthetic process                                            | 19/7778  | 26/18670  | 0.0011719 | 0.005714  | 0.003479 |
| BP | GO:0060706 | cell differentiation involved in embryonic placenta development          | 19/7778  | 26/18670  | 0.0011719 | 0.005714  | 0.003479 |
| BP | GO:0150117 | positive regulation of cell-substrate junction organization              | 19/7778  | 26/18670  | 0.0011719 | 0.005714  | 0.003479 |
| BP | GO:1903959 | regulation of anion transmembrane transport                              | 19/7778  | 26/18670  | 0.0011719 | 0.005714  | 0.003479 |
| BP | GO:0001893 | maternal placenta development                                            | 24/7778  | 35/18670  | 0.0011731 | 0.005714  | 0.003479 |
| BP | GO:0019076 | viral release from host cell                                             | 24/7778  | 35/18670  | 0.0011731 | 0.005714  | 0.003479 |
| BP | GO:0035890 | exit from host                                                           | 24/7778  | 35/18670  | 0.0011731 | 0.005714  | 0.003479 |
| BP | GO:0035891 | exit from host cell                                                      | 24/7778  | 35/18670  | 0.0011731 | 0.005714  | 0.003479 |
| BP | GO:2000785 | regulation of autophagosome assembly                                     | 24/7778  | 35/18670  | 0.0011731 | 0.005714  | 0.003479 |
| BP | GO:0009161 | ribonucleoside monophosphate metabolic process                           | 32/7778  | 50/18670  | 0.0011779 | 0.005714  | 0.003479 |
| BP | GO:0010171 | body morphogenesis                                                       | 32/7778  | 50/18670  | 0.0011779 | 0.005714  | 0.003479 |
| BP | GO:0032873 | negative regulation of stress-activated MAPK cascade                     | 32/7778  | 50/18670  | 0.0011779 | 0.005714  | 0.003479 |
| BP | GO:0045540 | regulation of cholesterol biosynthetic process                           | 32/7778  | 50/18670  | 0.0011779 | 0.005714  | 0.003479 |
| BP | GO:0070303 | negative regulation of stress-activated protein kinase signaling cascade | 32/7778  | 50/18670  | 0.0011779 | 0.005714  | 0.003479 |
| BP | GO:0106118 | regulation of sterol biosynthetic process                                | 32/7778  | 50/18670  | 0.0011779 | 0.005714  | 0.003479 |
| BP | GO:0060348 | bone development                                                         | 113/7778 | 217/18670 | 0.0011866 | 0.0057516 | 0.003502 |
| BP | GO:0007612 | learning                                                                 | 79/7778  | 145/18670 | 0.0011994 | 0.0058095 | 0.003537 |
| BP | GO:0008333 | endosome to lysosome transport                                           | 33/7778  | 52/18670  | 0.0012284 | 0.0059368 | 0.003615 |
| BP | GO:0072132 | mesenchyme morphogenesis                                                 | 33/7778  | 52/18670  | 0.0012284 | 0.0059368 | 0.003615 |
| BP | GO:0044344 | cellular response to fibroblast growth factor stimulus                   | 78/7778  | 143/18670 | 0.0012285 | 0.0059368 | 0.003615 |
| BP | GO:0007611 | learning or memory                                                       | 131/7778 | 256/18670 | 0.0012462 | 0.0060136 | 0.003661 |
| BP | GO:0090596 | sensory organ morphogenesis                                              | 131/7778 | 256/18670 | 0.0012462 | 0.0060136 | 0.003661 |
| BP | GO:0046890 | regulation of lipid biosynthetic process                                 | 104/7778 | 198/18670 | 0.00125   | 0.0060271 | 0.00367  |
| BP | GO:0009914 | hormone transport                                                        | 159/7778 | 317/18670 | 0.001268  | 0.0061097 | 0.00372  |
| BP | GO:0061387 | regulation of extent of cell growth                                      | 62/7778  | 110/18670 | 0.0012825 | 0.0061746 | 0.003759 |
| BP | GO:1903037 | regulation of leukocyte cell-cell adhesion                               | 153/7778 | 304/18670 | 0.0012915 | 0.0061995 | 0.003774 |
| BP | GO:0034405 | response to fluid shear stress                                           | 25/7778  | 37/18670  | 0.0012924 | 0.0061995 | 0.003774 |
| BP | GO:0060323 | head morphogenesis                                                       | 25/7778  | 37/18670  | 0.0012924 | 0.0061995 | 0.003774 |
| BP | GO:1900026 | positive regulation of substrate adhesion-dependent cell spreading       | 25/7778  | 37/18670  | 0.0012924 | 0.0061995 | 0.003774 |
| BP | GO:1905314 | semi-lunar valve development                                             | 25/7778  | 37/18670  | 0.0012924 | 0.0061995 | 0.003774 |
| BP | GO:0051495 | positive regulation of cytoskeleton organization                         | 117/7778 | 226/18670 | 0.0012941 | 0.0062026 | 0.003776 |
| BP | GO:0007519 | skeletal muscle tissue development                                       | 86/7778  | 160/18670 | 0.0012984 | 0.0062189 | 0.003786 |
| BP | GO:0010632 | regulation of epithelial cell migration                                  | 147/7778 | 291/18670 | 0.0013101 | 0.0062703 | 0.003818 |
| BP | GO:0035904 | aorta development                                                        | 36/7778  | 58/18670  | 0.0013507 | 0.006455  | 0.00393  |
| BP | GO:0061951 | establishment of protein localization to plasma membrane                 | 36/7778  | 58/18670  | 0.0013507 | 0.006455  | 0.00393  |
| BP | GO:0043486 | histone exchange                                                         | 37/7778  | 60/18670  | 0.0013822 | 0.006596  | 0.004016 |
| BP | GO:0032647 | regulation of interferon-alpha production                                | 20/7778  | 28/18670  | 0.0013833 | 0.006596  | 0.004016 |
| BP | GO:0051647 | nucleus localization                                                     | 20/7778  | 28/18670  | 0.0013833 | 0.006596  | 0.004016 |
| BP | GO:0006622 | protein targeting to lysosome                                            | 16/7778  | 21/18670  | 0.0014046 | 0.0066584 | 0.004054 |
| BP | GO:0035455 | response to interferon-alpha                                             | 16/7778  | 21/18670  | 0.0014046 | 0.0066584 | 0.004054 |
| BP | GO:0043984 | histone H4-K16 acetylation                                               | 16/7778  | 21/18670  | 0.0014046 | 0.0066584 | 0.004054 |
| BP | GO:0070920 | regulation of production of small RNA involved in gene silencing by F    | 16/7778  | 21/18670  | 0.0014046 | 0.0066584 | 0.004054 |
| BP | GO:0072111 | cell proliferation involved in kidney development                        | 16/7778  | 21/18670  | 0.0014046 | 0.0066584 | 0.004054 |
| BP | GO:0031062 | positive regulation of histone methylation                               | 26/7778  | 39/18670  | 0.0014046 | 0.0066584 | 0.004054 |
| BP | GO:0032506 | cytokinetic process                                                      | 26/7778  | 39/18670  | 0.0014046 | 0.0066584 | 0.004054 |
| BP | GO:0043001 | Golgi to plasma membrane protein transport                               | 26/7778  | 39/18670  | 0.0014046 | 0.0066584 | 0.004054 |
| BP | GO:0006220 | pyrimidine nucleotide metabolic process                                  | 38/7778  | 62/18670  | 0.0014094 | 0.0066711 | 0.004062 |
| BP | GO:0006521 | regulation of cellular amino acid metabolic process                      | 38/7778  | 62/18670  | 0.0014094 | 0.0066711 | 0.004062 |
| BP | GO:0030516 | regulation of axon extension                                             | 55/7778  | 96/18670  | 0.0014127 | 0.0066817 | 0.004068 |
| BP | GO:0042158 | lipoprotein biosynthetic process                                         | 54/7778  | 94/18670  | 0.001428  | 0.006749  | 0.004109 |
| BP | GO:0060135 | maternal process involved in female pregnancy                            | 39/7778  | 64/18670  | 0.0014325 | 0.0067604 | 0.004116 |
| BP | GO:1901607 | alpha-amino acid biosynthetic process                                    | 39/7778  | 64/18670  | 0.0014325 | 0.0067604 | 0.004116 |
| BP | GO:2000117 | negative regulation of cysteine-type endopeptidase activity              | 53/7778  | 92/18670  | 0.0014421 | 0.0068009 | 0.004141 |
| BP | GO:0048738 | cardiac muscle tissue development                                        | 120/7778 | 233/18670 | 0.0014445 | 0.0068071 | 0.004144 |
| BP | GO:0072171 | mesonephric tubule morphogenesis                                         | 40/7778  | 66/18670  | 0.0014516 | 0.0068358 | 0.004162 |
| BP | GO:0014033 | neural crest cell differentiation                                        | 52/7778  | 90/18670  | 0.001455  | 0.0068415 | 0.004165 |
| BP | GO:0051304 | chromosome separation                                                    | 52/7778  | 90/18670  | 0.001455  | 0.0068415 | 0.004165 |
| BP | GO:1903321 | negative regulation of protein modification by small protein conjugation | 51/7778  | 88/18670  | 0.0014664 | 0.0068766 | 0.004187 |
| BP | GO:0035914 | skeletal muscle cell differentiation                                     | 41/7778  | 68/18670  | 0.0014671 | 0.0068766 | 0.004187 |
| BP | GO:0046323 | glucose import                                                           | 41/7778  | 68/18670  | 0.0014671 | 0.0068766 | 0.004187 |
| BP | GO:0050890 | cognition                                                                | 149/7778 | 296/18670 | 0.0014674 | 0.0068766 | 0.004187 |
| BP | GO:0031958 | corticosteroid receptor signaling pathway                                | 13/7778  | 16/18670  | 0.0014731 | 0.0068766 | 0.004187 |
| BP | GO:0034975 | protein folding in endoplasmic reticulum                                 | 13/7778  | 16/18670  | 0.0014731 | 0.0068766 | 0.004187 |
| BP | GO:0035372 | protein localization to microtubule                                      | 13/7778  | 16/18670  | 0.0014731 | 0.0068766 | 0.004187 |

|    |            |                                                                         |          |           |           |           |          |
|----|------------|-------------------------------------------------------------------------|----------|-----------|-----------|-----------|----------|
| BP | GO:0051444 | negative regulation of ubiquitin-protein transferase activity           | 13/7778  | 16/18670  | 0.0014731 | 0.0068766 | 0.004187 |
| BP | GO:1902166 | negative regulation of intrinsic apoptotic signaling pathway in respon  | 13/7778  | 16/18670  | 0.0014731 | 0.0068766 | 0.004187 |
| BP | GO:1903830 | magnesium ion transmembrane transport                                   | 13/7778  | 16/18670  | 0.0014731 | 0.0068766 | 0.004187 |
| BP | GO:0035270 | endocrine system development                                            | 70/7778  | 127/18670 | 0.0014748 | 0.0068797 | 0.004189 |
| BP | GO:0043154 | negative regulation of cysteine-type endopeptidase activity involved i  | 49/7778  | 84/18670  | 0.0014845 | 0.0069141 | 0.00421  |
| BP | GO:0051492 | regulation of stress fiber assembly                                     | 49/7778  | 84/18670  | 0.0014845 | 0.0069141 | 0.00421  |
| BP | GO:0045619 | regulation of lymphocyte differentiation                                | 90/7778  | 169/18670 | 0.0014854 | 0.0069141 | 0.00421  |
| BP | GO:0035019 | somatic stem cell population maintenance                                | 43/7778  | 72/18670  | 0.001488  | 0.0069159 | 0.004211 |
| BP | GO:0051881 | regulation of mitochondrial membrane potential                          | 43/7778  | 72/18670  | 0.001488  | 0.0069159 | 0.004211 |
| BP | GO:0072078 | nephron tubule morphogenesis                                            | 44/7778  | 74/18670  | 0.0014937 | 0.0069333 | 0.004221 |
| BP | GO:0007492 | endoderm development                                                    | 45/7778  | 76/18670  | 0.0014967 | 0.0069333 | 0.004221 |
| BP | GO:0030500 | regulation of bone mineralization                                       | 45/7778  | 76/18670  | 0.0014967 | 0.0069333 | 0.004221 |
| BP | GO:0031507 | heterochromatin assembly                                                | 45/7778  | 76/18670  | 0.0014967 | 0.0069333 | 0.004221 |
| BP | GO:0090398 | cellular senescence                                                     | 46/7778  | 78/18670  | 0.0014971 | 0.0069333 | 0.004221 |
| BP | GO:0061028 | establishment of endothelial barrier                                    | 27/7778  | 41/18670  | 0.001509  | 0.0069734 | 0.004246 |
| BP | GO:0090224 | regulation of spindle organization                                      | 27/7778  | 41/18670  | 0.001509  | 0.0069734 | 0.004246 |
| BP | GO:0090317 | negative regulation of intracellular protein transport                  | 27/7778  | 41/18670  | 0.001509  | 0.0069734 | 0.004246 |
| BP | GO:0006364 | rRNA processing                                                         | 111/7778 | 214/18670 | 0.0015556 | 0.0071836 | 0.004374 |
| BP | GO:0032728 | positive regulation of interferon-beta production                       | 21/7778  | 30/18670  | 0.0015879 | 0.0073169 | 0.004455 |
| BP | GO:0048873 | homeostasis of number of cells within a tissue                          | 21/7778  | 30/18670  | 0.0015879 | 0.0073169 | 0.004455 |
| BP | GO:0061157 | mRNA destabilization                                                    | 21/7778  | 30/18670  | 0.0015879 | 0.0073169 | 0.004455 |
| BP | GO:0034198 | cellular response to amino acid starvation                              | 28/7778  | 43/18670  | 0.0016051 | 0.0073912 | 0.0045   |
| BP | GO:0016072 | rRNA metabolic process                                                  | 116/7778 | 225/18670 | 0.0016357 | 0.0075268 | 0.004583 |
| BP | GO:0010569 | regulation of double-strand break repair via homologous recombina       | 29/7778  | 45/18670  | 0.0016929 | 0.0077787 | 0.004736 |
| BP | GO:0048255 | mRNA stabilization                                                      | 29/7778  | 45/18670  | 0.0016929 | 0.0077787 | 0.004736 |
| BP | GO:0043244 | regulation of protein-containing complex disassembly                    | 63/7778  | 113/18670 | 0.0017027 | 0.007818  | 0.00476  |
| BP | GO:0035305 | negative regulation of dephosphorylation                                | 62/7778  | 111/18670 | 0.0017352 | 0.0079616 | 0.004847 |
| BP | GO:0006541 | glutamine metabolic process                                             | 17/7778  | 23/18670  | 0.0017506 | 0.0080211 | 0.004883 |
| BP | GO:0009067 | aspartate family amino acid biosynthetic process                        | 17/7778  | 23/18670  | 0.0017506 | 0.0080211 | 0.004883 |
| BP | GO:0030509 | BMP signaling pathway                                                   | 84/7778  | 157/18670 | 0.0017526 | 0.0080243 | 0.004885 |
| BP | GO:0120163 | negative regulation of cold-induced thermogenesis                       | 30/7778  | 47/18670  | 0.0017723 | 0.0081088 | 0.004937 |
| BP | GO:0039694 | viral RNA genome replication                                            | 22/7778  | 32/18670  | 0.0017825 | 0.0081214 | 0.004945 |
| BP | GO:0046685 | response to arsenic-containing substance                                | 22/7778  | 32/18670  | 0.0017825 | 0.0081214 | 0.004945 |
| BP | GO:0050779 | RNA destabilization                                                     | 22/7778  | 32/18670  | 0.0017825 | 0.0081214 | 0.004945 |
| BP | GO:0060674 | placenta blood vessel development                                       | 22/7778  | 32/18670  | 0.0017825 | 0.0081214 | 0.004945 |
| BP | GO:1905508 | protein localization to microtubule organizing center                   | 22/7778  | 32/18670  | 0.0017825 | 0.0081214 | 0.004945 |
| BP | GO:0032496 | response to lipopolysaccharide                                          | 164/7778 | 330/18670 | 0.0017826 | 0.0081214 | 0.004945 |
| BP | GO:0051651 | maintenance of location in cell                                         | 113/7778 | 219/18670 | 0.0017955 | 0.0081745 | 0.004977 |
| BP | GO:0046486 | glycerolipid metabolic process                                          | 202/7778 | 414/18670 | 0.0018043 | 0.0082085 | 0.004998 |
| BP | GO:0044262 | cellular carbohydrate metabolic process                                 | 142/7778 | 282/18670 | 0.0018355 | 0.0083446 | 0.00508  |
| BP | GO:2001238 | positive regulation of extrinsic apoptotic signaling pathway            | 31/7778  | 49/18670  | 0.0018435 | 0.008375  | 0.005099 |
| BP | GO:0043280 | positive regulation of cysteine-type endopeptidase activity involved in | 72/7778  | 132/18670 | 0.0018515 | 0.0083967 | 0.005112 |
| BP | GO:0016485 | protein processing                                                      | 112/7778 | 217/18670 | 0.0018522 | 0.0083967 | 0.005112 |
| BP | GO:0043624 | cellular protein complex disassembly                                    | 112/7778 | 217/18670 | 0.0018522 | 0.0083967 | 0.005112 |
| BP | GO:0032091 | negative regulation of protein binding                                  | 58/7778  | 103/18670 | 0.0018623 | 0.0084366 | 0.005136 |
| BP | GO:0046632 | alpha-beta T cell differentiation                                       | 57/7778  | 101/18670 | 0.0018928 | 0.008569  | 0.005217 |
| BP | GO:0042157 | lipoprotein metabolic process                                           | 71/7778  | 130/18670 | 0.0018963 | 0.0085787 | 0.005223 |
| BP | GO:0007159 | leukocyte cell-cell adhesion                                            | 167/7778 | 337/18670 | 0.0019023 | 0.0085998 | 0.005236 |
| BP | GO:0072527 | pyrimidine-containing compound metabolic process                        | 56/7778  | 99/18670  | 0.0019227 | 0.0086859 | 0.005288 |
| BP | GO:0002576 | platelet degranulation                                                  | 70/7778  | 128/18670 | 0.0019417 | 0.0087487 | 0.005326 |
| BP | GO:0048592 | eye morphogenesis                                                       | 80/7778  | 149/18670 | 0.0019527 | 0.0087487 | 0.005326 |
| BP | GO:2001056 | positive regulation of cysteine-type endopeptidase activity             | 80/7778  | 149/18670 | 0.0019527 | 0.0087487 | 0.005326 |
| BP | GO:0000054 | ribosomal subunit export from nucleus                                   | 11/7778  | 13/18670  | 0.0019543 | 0.0087487 | 0.005326 |
| BP | GO:0007183 | SMAD protein complex assembly                                           | 11/7778  | 13/18670  | 0.0019543 | 0.0087487 | 0.005326 |
| BP | GO:0008298 | intracellular mRNA localization                                         | 11/7778  | 13/18670  | 0.0019543 | 0.0087487 | 0.005326 |
| BP | GO:0033750 | ribosome localization                                                   | 11/7778  | 13/18670  | 0.0019543 | 0.0087487 | 0.005326 |
| BP | GO:0034982 | mitochondrial protein processing                                        | 11/7778  | 13/18670  | 0.0019543 | 0.0087487 | 0.005326 |
| BP | GO:0051315 | attachment of mitotic spindle microtubules to kinetochore               | 11/7778  | 13/18670  | 0.0019543 | 0.0087487 | 0.005326 |
| BP | GO:0060340 | positive regulation of type I interferon-mediated signaling pathway     | 11/7778  | 13/18670  | 0.0019543 | 0.0087487 | 0.005326 |
| BP | GO:0061029 | eyelid development in camera-type eye                                   | 11/7778  | 13/18670  | 0.0019543 | 0.0087487 | 0.005326 |
| BP | GO:1900103 | positive regulation of endoplasmic reticulum unfolded protein respon    | 11/7778  | 13/18670  | 0.0019543 | 0.0087487 | 0.005326 |
| BP | GO:1903960 | negative regulation of anion transmembrane transport                    | 11/7778  | 13/18670  | 0.0019543 | 0.0087487 | 0.005326 |
| BP | GO:0031638 | zymogen activation                                                      | 33/7778  | 53/18670  | 0.0019621 | 0.008761  | 0.005334 |
| BP | GO:0002183 | cytoplasmic translational initiation                                    | 23/7778  | 34/18670  | 0.0019652 | 0.008761  | 0.005334 |
| BP | GO:0018345 | protein palmitoylation                                                  | 23/7778  | 34/18670  | 0.0019652 | 0.008761  | 0.005334 |
| BP | GO:0031128 | developmental induction                                                 | 23/7778  | 34/18670  | 0.0019652 | 0.008761  | 0.005334 |
| BP | GO:0043276 | anoikis                                                                 | 23/7778  | 34/18670  | 0.0019652 | 0.008761  | 0.005334 |
| BP | GO:0062208 | positive regulation of pattern recognition receptor signaling pathway   | 23/7778  | 34/18670  | 0.0019652 | 0.008761  | 0.005334 |
| BP | GO:0060271 | cilium assembly                                                         | 180/7778 | 366/18670 | 0.0020042 | 0.008929  | 0.005436 |
| BP | GO:0048704 | embryonic skeletal system morphogenesis                                 | 53/7778  | 93/18670  | 0.0020068 | 0.008934  | 0.005439 |
| BP | GO:0019218 | regulation of steroid metabolic process                                 | 68/7778  | 124/18670 | 0.0020343 | 0.0090419 | 0.005505 |
| BP | GO:0007221 | positive regulation of transcription of Notch receptor target           | 14/7778  | 18/18670  | 0.0020394 | 0.0090419 | 0.005505 |
| BP | GO:0031468 | nuclear envelope reassembly                                             | 14/7778  | 18/18670  | 0.0020394 | 0.0090419 | 0.005505 |
| BP | GO:1900153 | positive regulation of nuclear-transcribed mRNA catabolic process, d    | 14/7778  | 18/18670  | 0.0020394 | 0.0090419 | 0.005505 |
| BP | GO:1902165 | regulation of intrinsic apoptotic signaling pathway in response to DN   | 14/7778  | 18/18670  | 0.0020394 | 0.0090419 | 0.005505 |
| BP | GO:2000757 | negative regulation of peptidyl-lysine acetylation                      | 14/7778  | 18/18670  | 0.0020394 | 0.0090419 | 0.005505 |
| BP | GO:0043525 | positive regulation of neuron apoptotic process                         | 35/7778  | 57/18670  | 0.0020511 | 0.0090751 | 0.005525 |
| BP | GO:0048008 | platelet-derived growth factor receptor signaling pathway               | 35/7778  | 57/18670  | 0.0020511 | 0.0090751 | 0.005525 |
| BP | GO:1901799 | negative regulation of proteasomal protein catabolic process            | 35/7778  | 57/18670  | 0.0020511 | 0.0090751 | 0.005525 |
| BP | GO:0072599 | establishment of protein localization to endoplasmic reticulum          | 67/7778  | 122/18670 | 0.0020813 | 0.009202  | 0.005602 |
| BP | GO:0001658 | branching involved in ureteric bud morphogenesis                        | 36/7778  | 59/18670  | 0.0020855 | 0.009202  | 0.005602 |
| BP | GO:0033619 | membrane protein proteolysis                                            | 36/7778  | 59/18670  | 0.0020855 | 0.009202  | 0.005602 |
| BP | GO:0045071 | negative regulation of viral genome replication                         | 36/7778  | 59/18670  | 0.0020855 | 0.009202  | 0.005602 |
| BP | GO:0001945 | lymph vessel development                                                | 18/7778  | 25/18670  | 0.0020892 | 0.0092042 | 0.005604 |
| BP | GO:0051894 | positive regulation of focal adhesion assembly                          | 18/7778  | 25/18670  | 0.0020892 | 0.0092042 | 0.005604 |
| BP | GO:0050817 | coagulation                                                             | 169/7778 | 342/18670 | 0.0020903 | 0.0092042 | 0.005604 |
| BP | GO:0009199 | ribonucleoside triphosphate metabolic process                           | 48/7778  | 83/18670  | 0.0021188 | 0.009317  | 0.005673 |
| BP | GO:1903845 | negative regulation of cellular response to transforming growth factor  | 48/7778  | 83/18670  | 0.0021188 | 0.009317  | 0.005673 |
| BP | GO:0006007 | glucose catabolic process                                               | 24/7778  | 36/18670  | 0.0021345 | 0.0093512 | 0.005693 |
| BP | GO:0051973 | positive regulation of telomerase activity                              | 24/7778  | 36/18670  | 0.0021345 | 0.0093512 | 0.005693 |
| BP | GO:0014032 | neural crest cell development                                           | 47/7778  | 81/18670  | 0.0021353 | 0.0093512 | 0.005693 |
| BP | GO:0030512 | negative regulation of transforming growth factor beta receptor signa   | 47/7778  | 81/18670  | 0.0021353 | 0.0093512 | 0.005693 |

|    |            |                                                                          |          |           |           |           |          |
|----|------------|--------------------------------------------------------------------------|----------|-----------|-----------|-----------|----------|
| BP | GO:0033238 | regulation of cellular amine metabolic process                           | 47/7778  | 81/18670  | 0.0021353 | 0.0093512 | 0.005693 |
| BP | GO:0034109 | homotypic cell-cell adhesion                                             | 47/7778  | 81/18670  | 0.0021353 | 0.0093512 | 0.005693 |
| BP | GO:0045652 | regulation of megakaryocyte differentiation                              | 46/7778  | 79/18670  | 0.0021493 | 0.009406  | 0.005727 |
| BP | GO:0060675 | ureteric bud morphogenesis                                               | 39/7778  | 65/18670  | 0.0021529 | 0.0094153 | 0.005732 |
| BP | GO:0051298 | centrosome duplication                                                   | 40/7778  | 67/18670  | 0.0021647 | 0.0094606 | 0.00576  |
| BP | GO:0006164 | purine nucleotide biosynthetic process                                   | 100/7778 | 192/18670 | 0.0021769 | 0.0095077 | 0.005789 |
| BP | GO:0042180 | cellular ketone metabolic process                                        | 125/7778 | 246/18670 | 0.0022008 | 0.0096054 | 0.005848 |
| BP | GO:0016572 | histone phosphorylation                                                  | 25/7778  | 38/18670  | 0.0022898 | 0.0099668 | 0.006068 |
| BP | GO:0046326 | positive regulation of glucose import                                    | 25/7778  | 38/18670  | 0.0022898 | 0.0099668 | 0.006068 |
| BP | GO:0046676 | negative regulation of insulin secretion                                 | 25/7778  | 38/18670  | 0.0022898 | 0.0099668 | 0.006068 |
| BP | GO:2000279 | negative regulation of DNA biosynthetic process                          | 25/7778  | 38/18670  | 0.0022898 | 0.0099668 | 0.006068 |
| BP | GO:0070304 | positive regulation of stress-activated protein kinase signaling cascade | 91/7778  | 173/18670 | 0.002292  | 0.0099696 | 0.00607  |
| BP | GO:0001938 | positive regulation of endothelial cell proliferation                    | 62/7778  | 112/18670 | 0.0023224 | 0.0100951 | 0.006146 |
| BP | GO:0002934 | desmosome organization                                                   | 9/7778   | 10/18670  | 0.0023574 | 0.010174  | 0.006194 |
| BP | GO:0014041 | regulation of neuron maturation                                          | 9/7778   | 10/18670  | 0.0023574 | 0.010174  | 0.006194 |
| BP | GO:0032875 | regulation of DNA endoreduplication                                      | 9/7778   | 10/18670  | 0.0023574 | 0.010174  | 0.006194 |
| BP | GO:0034770 | histone H4-K20 methylation                                               | 9/7778   | 10/18670  | 0.0023574 | 0.010174  | 0.006194 |
| BP | GO:0035520 | monoubiquitinated protein deubiquitination                               | 9/7778   | 10/18670  | 0.0023574 | 0.010174  | 0.006194 |
| BP | GO:1903405 | protein localization to nuclear body                                     | 9/7778   | 10/18670  | 0.0023574 | 0.010174  | 0.006194 |
| BP | GO:1903800 | positive regulation of production of miRNAs involved in gene silencing   | 9/7778   | 10/18670  | 0.0023574 | 0.010174  | 0.006194 |
| BP | GO:1904851 | positive regulation of establishment of protein localization to telomere | 9/7778   | 10/18670  | 0.0023574 | 0.010174  | 0.006194 |
| BP | GO:1904867 | protein localization to Cajal body                                       | 9/7778   | 10/18670  | 0.0023574 | 0.010174  | 0.006194 |
| BP | GO:2000109 | regulation of macrophage apoptotic process                               | 9/7778   | 10/18670  | 0.0023574 | 0.010174  | 0.006194 |
| BP | GO:0090501 | RNA phosphodiester bond hydrolysis                                       | 82/7778  | 154/18670 | 0.0023579 | 0.010174  | 0.006194 |
| BP | GO:0000188 | inactivation of MAPK activity                                            | 19/7778  | 27/18670  | 0.0024127 | 0.0103965 | 0.00633  |
| BP | GO:0071514 | genetic imprinting                                                       | 19/7778  | 27/18670  | 0.0024127 | 0.0103965 | 0.00633  |
| BP | GO:0048639 | positive regulation of developmental growth                              | 96/7778  | 184/18670 | 0.0024585 | 0.0105865 | 0.006445 |
| BP | GO:0071482 | cellular response to light stimulus                                      | 70/7778  | 129/18670 | 0.0025336 | 0.0109027 | 0.006638 |
| BP | GO:0043010 | camera-type eye development                                              | 158/7778 | 319/18670 | 0.0025377 | 0.0109131 | 0.006644 |
| BP | GO:0048489 | synaptic vesicle transport                                               | 27/7778  | 42/18670  | 0.0025574 | 0.0109905 | 0.006691 |
| BP | GO:0051321 | meiotic cell cycle                                                       | 126/7778 | 249/18670 | 0.0025622 | 0.011004  | 0.0067   |
| BP | GO:2000379 | positive regulation of reactive oxygen species metabolic process         | 57/7778  | 102/18670 | 0.0025665 | 0.0110148 | 0.006706 |
| BP | GO:0002320 | lymphoid progenitor cell differentiation                                 | 15/7778  | 20/18670  | 0.0026082 | 0.0111792 | 0.006806 |
| BP | GO:0060602 | branch elongation of an epithelium                                       | 15/7778  | 20/18670  | 0.0026082 | 0.0111792 | 0.006806 |
| BP | GO:0060840 | artery development                                                       | 56/7778  | 100/18670 | 0.0026146 | 0.0111914 | 0.006814 |
| BP | GO:0120034 | positive regulation of plasma membrane bounded cell projection assembly  | 56/7778  | 100/18670 | 0.0026146 | 0.0111914 | 0.006814 |
| BP | GO:1901215 | negative regulation of neuron death                                      | 107/7778 | 208/18670 | 0.0026482 | 0.0113279 | 0.006897 |
| BP | GO:0030225 | macrophage differentiation                                               | 28/7778  | 44/18670  | 0.0026701 | 0.0113836 | 0.006931 |
| BP | GO:0034080 | CENP-A containing nucleosome assembly                                    | 28/7778  | 44/18670  | 0.0026701 | 0.0113836 | 0.006931 |
| BP | GO:0035307 | positive regulation of protein dephosphorylation                         | 28/7778  | 44/18670  | 0.0026701 | 0.0113836 | 0.006931 |
| BP | GO:0060999 | positive regulation of dendritic spine development                       | 28/7778  | 44/18670  | 0.0026701 | 0.0113836 | 0.006931 |
| BP | GO:0061641 | CENP-A containing chromatin organization                                 | 28/7778  | 44/18670  | 0.0026701 | 0.0113836 | 0.006931 |
| BP | GO:0099504 | synaptic vesicle cycle                                                   | 100/7778 | 193/18670 | 0.0026872 | 0.0114489 | 0.00697  |
| BP | GO:0010950 | positive regulation of endopeptidase activity                            | 93/7778  | 178/18670 | 0.0026926 | 0.0114644 | 0.00698  |
| BP | GO:0071322 | cellular response to carbohydrate stimulus                               | 77/7778  | 144/18670 | 0.0027101 | 0.011512  | 0.007009 |
| BP | GO:1902107 | positive regulation of leukocyte differentiation                         | 77/7778  | 144/18670 | 0.0027101 | 0.011512  | 0.007009 |
| BP | GO:0005979 | regulation of glycogen biosynthetic process                              | 20/7778  | 29/18670  | 0.0027163 | 0.011512  | 0.007009 |
| BP | GO:0010962 | regulation of glucan biosynthetic process                                | 20/7778  | 29/18670  | 0.0027163 | 0.011512  | 0.007009 |
| BP | GO:0031116 | positive regulation of microtubule polymerization                        | 20/7778  | 29/18670  | 0.0027163 | 0.011512  | 0.007009 |
| BP | GO:0031365 | N-terminal protein amino acid modification                               | 20/7778  | 29/18670  | 0.0027163 | 0.011512  | 0.007009 |
| BP | GO:1900181 | negative regulation of protein localization to nucleus                   | 20/7778  | 29/18670  | 0.0027163 | 0.011512  | 0.007009 |
| BP | GO:0043491 | protein kinase B signaling                                               | 135/7778 | 269/18670 | 0.0027367 | 0.0115908 | 0.007057 |
| BP | GO:0000726 | non-recombinational repair                                               | 53/7778  | 94/18670  | 0.0027549 | 0.0116452 | 0.00709  |
| BP | GO:0070167 | regulation of biomineral tissue development                              | 53/7778  | 94/18670  | 0.0027549 | 0.0116452 | 0.00709  |
| BP | GO:0110149 | regulation of biomineralization                                          | 53/7778  | 94/18670  | 0.0027549 | 0.0116452 | 0.00709  |
| BP | GO:0043631 | RNA polyadenylation                                                      | 29/7778  | 46/18670  | 0.0027692 | 0.0116902 | 0.007117 |
| BP | GO:1990928 | response to amino acid starvation                                        | 29/7778  | 46/18670  | 0.0027692 | 0.0116902 | 0.007117 |
| BP | GO:0010811 | positive regulation of cell-substrate adhesion                           | 66/7778  | 121/18670 | 0.0027971 | 0.0117994 | 0.007184 |
| BP | GO:0001819 | positive regulation of cytokine production                               | 223/7778 | 464/18670 | 0.0027987 | 0.0117994 | 0.007184 |
| BP | GO:0046330 | positive regulation of JNK cascade                                       | 75/7778  | 140/18670 | 0.0028631 | 0.012063  | 0.007344 |
| BP | GO:0045921 | positive regulation of exocytosis                                        | 50/7778  | 88/18670  | 0.0028857 | 0.0121501 | 0.007397 |
| BP | GO:0001764 | neuron migration                                                         | 83/7778  | 157/18670 | 0.0028981 | 0.0121806 | 0.007416 |
| BP | GO:0050870 | positive regulation of T cell activation                                 | 104/7778 | 202/18670 | 0.0029099 | 0.0121806 | 0.007416 |
| BP | GO:0002483 | antigen processing and presentation of endogenous peptide antigen        | 12/7778  | 15/18670  | 0.0029099 | 0.0121806 | 0.007416 |
| BP | GO:0019885 | antigen processing and presentation of endogenous peptide antigen        | 12/7778  | 15/18670  | 0.0029099 | 0.0121806 | 0.007416 |
| BP | GO:0031054 | pre-miRNA processing                                                     | 12/7778  | 15/18670  | 0.0029099 | 0.0121806 | 0.007416 |
| BP | GO:0035067 | negative regulation of histone acetylation                               | 12/7778  | 15/18670  | 0.0029099 | 0.0121806 | 0.007416 |
| BP | GO:0035635 | entry of bacterium into host cell                                        | 12/7778  | 15/18670  | 0.0029099 | 0.0121806 | 0.007416 |
| BP | GO:0090141 | positive regulation of mitochondrial fission                             | 12/7778  | 15/18670  | 0.0029099 | 0.0121806 | 0.007416 |
| BP | GO:1903358 | regulation of Golgi organization                                         | 12/7778  | 15/18670  | 0.0029099 | 0.0121806 | 0.007416 |
| BP | GO:0042058 | regulation of epidermal growth factor receptor signaling pathway         | 49/7778  | 86/18670  | 0.0029262 | 0.012238  | 0.007451 |
| BP | GO:0031113 | regulation of microtubule polymerization                                 | 31/7778  | 50/18670  | 0.0029294 | 0.012238  | 0.007451 |
| BP | GO:0060976 | coronary vasculature development                                         | 31/7778  | 50/18670  | 0.0029294 | 0.012238  | 0.007451 |
| BP | GO:0032874 | positive regulation of stress-activated MAPK cascade                     | 90/7778  | 172/18670 | 0.0029482 | 0.0123088 | 0.007494 |
| BP | GO:0002718 | regulation of cytokine production involved in immune response            | 48/7778  | 84/18670  | 0.0029646 | 0.0123692 | 0.007531 |
| BP | GO:1902373 | negative regulation of mRNA catabolic process                            | 32/7778  | 52/18670  | 0.0029918 | 0.0124551 | 0.007583 |
| BP | GO:0002082 | regulation of oxidative phosphorylation                                  | 21/7778  | 31/18670  | 0.0029968 | 0.0124551 | 0.007583 |
| BP | GO:0007143 | female meiotic nuclear division                                          | 21/7778  | 31/18670  | 0.0029968 | 0.0124551 | 0.007583 |
| BP | GO:0034694 | response to prostaglandin                                                | 21/7778  | 31/18670  | 0.0029968 | 0.0124551 | 0.007583 |
| BP | GO:1902186 | regulation of viral release from host cell                               | 21/7778  | 31/18670  | 0.0029968 | 0.0124551 | 0.007583 |
| BP | GO:2000781 | positive regulation of double-strand break repair                        | 21/7778  | 31/18670  | 0.0029968 | 0.0124551 | 0.007583 |
| BP | GO:0007292 | female gamete generation                                                 | 73/7778  | 136/18670 | 0.0030233 | 0.0125571 | 0.007645 |
| BP | GO:0140029 | exocytic process                                                         | 46/7778  | 80/18670  | 0.0030344 | 0.0125952 | 0.007668 |
| BP | GO:0000271 | polysaccharide biosynthetic process                                      | 45/7778  | 78/18670  | 0.0030651 | 0.0127145 | 0.007741 |
| BP | GO:0072528 | pyrimidine-containing compound biosynthetic process                      | 34/7778  | 56/18670  | 0.0030848 | 0.0127879 | 0.007786 |
| BP | GO:0046605 | regulation of centrosome cycle                                           | 35/7778  | 58/18670  | 0.003117  | 0.0129128 | 0.007862 |
| BP | GO:0006305 | DNA alkylation                                                           | 42/7778  | 72/18670  | 0.003136  | 0.0129666 | 0.007894 |
| BP | GO:0006306 | DNA methylation                                                          | 42/7778  | 72/18670  | 0.003136  | 0.0129666 | 0.007894 |
| BP | GO:0009123 | nucleoside monophosphate metabolic process                               | 42/7778  | 72/18670  | 0.003136  | 0.0129666 | 0.007894 |
| BP | GO:0022037 | metencephalon development                                                | 61/7778  | 111/18670 | 0.0031474 | 0.0129916 | 0.00791  |
| BP | GO:0001756 | somitogenesis                                                            | 41/7778  | 70/18670  | 0.0031511 | 0.0129916 | 0.00791  |
| BP | GO:0002260 | lymphocyte homeostasis                                                   | 37/7778  | 62/18670  | 0.003156  | 0.0129916 | 0.00791  |

|    |            |                                                                             |          |           |           |           |          |
|----|------------|-----------------------------------------------------------------------------|----------|-----------|-----------|-----------|----------|
| BP | GO:0032835 | glomerulus development                                                      | 37/7778  | 62/18670  | 0.003156  | 0.0129916 | 0.00791  |
| BP | GO:0045649 | regulation of macrophage differentiation                                    | 16/7778  | 22/18670  | 0.0031582 | 0.0129916 | 0.00791  |
| BP | GO:0071379 | cellular response to prostaglandin stimulus                                 | 16/7778  | 22/18670  | 0.0031582 | 0.0129916 | 0.00791  |
| BP | GO:0140112 | extracellular vesicle biogenesis                                            | 16/7778  | 22/18670  | 0.0031582 | 0.0129916 | 0.00791  |
| BP | GO:1901984 | negative regulation of protein acetylation                                  | 16/7778  | 22/18670  | 0.0031582 | 0.0129916 | 0.00791  |
| BP | GO:0030032 | lamellipodium assembly                                                      | 38/7778  | 64/18670  | 0.0031642 | 0.0129916 | 0.00791  |
| BP | GO:0045600 | positive regulation of fat cell differentiation                             | 38/7778  | 64/18670  | 0.0031642 | 0.0129916 | 0.00791  |
| BP | GO:0048278 | vesicle docking                                                             | 38/7778  | 64/18670  | 0.0031642 | 0.0129916 | 0.00791  |
| BP | GO:0003158 | endothelium development                                                     | 71/7778  | 132/18670 | 0.0031907 | 0.0130919 | 0.007971 |
| BP | GO:0006613 | cotranslational protein targeting to membrane                               | 60/7778  | 109/18670 | 0.0032196 | 0.0131939 | 0.008033 |
| BP | GO:0051261 | protein depolymerization                                                    | 60/7778  | 109/18670 | 0.0032196 | 0.0131939 | 0.008033 |
| BP | GO:0051216 | cartilage development                                                       | 107/7778 | 209/18670 | 0.0032264 | 0.0132133 | 0.008045 |
| BP | GO:0009156 | ribonucleoside monophosphate biosynthetic process                           | 22/7778  | 33/18670  | 0.0032527 | 0.0132788 | 0.008085 |
| BP | GO:0009303 | rRNA transcription                                                          | 22/7778  | 33/18670  | 0.0032527 | 0.0132788 | 0.008085 |
| BP | GO:0031112 | positive regulation of microtubule polymerization or depolymerization       | 22/7778  | 33/18670  | 0.0032527 | 0.0132788 | 0.008085 |
| BP | GO:0051443 | positive regulation of ubiquitin-protein transferase activity               | 22/7778  | 33/18670  | 0.0032527 | 0.0132788 | 0.008085 |
| BP | GO:0071985 | multivesicular body sorting pathway                                         | 22/7778  | 33/18670  | 0.0032527 | 0.0132788 | 0.008085 |
| BP | GO:0097305 | response to alcohol                                                         | 118/7778 | 233/18670 | 0.0033123 | 0.0135134 | 0.008227 |
| BP | GO:0044272 | sulfur compound biosynthetic process                                        | 99/7778  | 192/18670 | 0.0034047 | 0.0138817 | 0.008452 |
| BP | GO:0002237 | response to molecule of bacterial origin                                    | 168/7778 | 343/18670 | 0.0034123 | 0.013904  | 0.008465 |
| BP | GO:0006732 | coenzyme metabolic process                                                  | 128/7778 | 255/18670 | 0.0034295 | 0.0139651 | 0.008502 |
| BP | GO:0006334 | nucleosome assembly                                                         | 77/7778  | 145/18670 | 0.0034467 | 0.0140262 | 0.00854  |
| BP | GO:0003230 | cardiac atrium development                                                  | 23/7778  | 35/18670  | 0.0034834 | 0.01414   | 0.008609 |
| BP | GO:0021955 | central nervous system neuron axonogenesis                                  | 23/7778  | 35/18670  | 0.0034834 | 0.01414   | 0.008609 |
| BP | GO:0051443 | establishment of spindle orientation                                        | 23/7778  | 35/18670  | 0.0034834 | 0.01414   | 0.008609 |
| BP | GO:0071108 | protein K48-linked deubiquitination                                         | 23/7778  | 35/18670  | 0.0034834 | 0.01414   | 0.008609 |
| BP | GO:0030316 | osteoclast differentiation                                                  | 54/7778  | 97/18670  | 0.0036599 | 0.0148377 | 0.009034 |
| BP | GO:0032231 | regulation of actin filament bundle assembly                                | 54/7778  | 97/18670  | 0.0036599 | 0.0148377 | 0.009034 |
| BP | GO:0022616 | DNA strand elongation                                                       | 17/7778  | 24/18670  | 0.0036758 | 0.0148742 | 0.009056 |
| BP | GO:0034629 | cellular protein-containing complex localization                            | 17/7778  | 24/18670  | 0.0036758 | 0.0148742 | 0.009056 |
| BP | GO:2000209 | regulation of anoikis                                                       | 17/7778  | 24/18670  | 0.0036758 | 0.0148742 | 0.009056 |
| BP | GO:0006296 | nucleotide-excision repair, DNA incision, 5'-to lesion                      | 24/7778  | 37/18670  | 0.0036891 | 0.0148812 | 0.00906  |
| BP | GO:0031111 | negative regulation of microtubule polymerization or depolymerization       | 24/7778  | 37/18670  | 0.0036891 | 0.0148812 | 0.00906  |
| BP | GO:0051567 | histone H3-K9 methylation                                                   | 24/7778  | 37/18670  | 0.0036891 | 0.0148812 | 0.00906  |
| BP | GO:1901998 | toxin transport                                                             | 24/7778  | 37/18670  | 0.0036891 | 0.0148812 | 0.00906  |
| BP | GO:1903432 | regulation of TORC1 signaling                                               | 24/7778  | 37/18670  | 0.0036891 | 0.0148812 | 0.00906  |
| BP | GO:0006520 | cellular amino acid metabolic process                                       | 170/7778 | 348/18670 | 0.0037107 | 0.014959  | 0.009108 |
| BP | GO:0045047 | protein targeting to ER                                                     | 64/7778  | 118/18670 | 0.0038331 | 0.0154427 | 0.009402 |
| BP | GO:0071216 | cellular response to biotic stimulus                                        | 119/7778 | 236/18670 | 0.0038444 | 0.0154682 | 0.009418 |
| BP | GO:0061025 | membrane fusion                                                             | 81/7778  | 154/18670 | 0.003863  | 0.0154682 | 0.009418 |
| BP | GO:0007076 | mitotic chromosome condensation                                             | 13/7778  | 17/18670  | 0.0038659 | 0.0154682 | 0.009418 |
| BP | GO:0033599 | regulation of mammary gland epithelial cell proliferation                   | 13/7778  | 17/18670  | 0.0038659 | 0.0154682 | 0.009418 |
| BP | GO:0035313 | wound healing, spreading of epidermal cells                                 | 13/7778  | 17/18670  | 0.0038659 | 0.0154682 | 0.009418 |
| BP | GO:0035518 | histone H2A monoubiquitination                                              | 13/7778  | 17/18670  | 0.0038659 | 0.0154682 | 0.009418 |
| BP | GO:0061298 | retina vasculature development in camera-type eye                           | 13/7778  | 17/18670  | 0.0038659 | 0.0154682 | 0.009418 |
| BP | GO:0062033 | positive regulation of mitotic sister chromatid segregation                 | 13/7778  | 17/18670  | 0.0038659 | 0.0154682 | 0.009418 |
| BP | GO:1901524 | regulation of mitophagy                                                     | 13/7778  | 17/18670  | 0.0038659 | 0.0154682 | 0.009418 |
| BP | GO:2000001 | regulation of DNA damage checkpoint                                         | 13/7778  | 17/18670  | 0.0038659 | 0.0154682 | 0.009418 |
| BP | GO:2000641 | regulation of early endosome to late endosome transport                     | 13/7778  | 17/18670  | 0.0038659 | 0.0154682 | 0.009418 |
| BP | GO:1902116 | negative regulation of organelle assembly                                   | 25/7778  | 39/18670  | 0.0038704 | 0.015477  | 0.009423 |
| BP | GO:0071331 | cellular response to hexose stimulus                                        | 72/7778  | 135/18670 | 0.0039733 | 0.0158783 | 0.009667 |
| BP | GO:0002371 | dendritic cell cytokine production                                          | 10/7778  | 12/18670  | 0.0040142 | 0.0159037 | 0.009683 |
| BP | GO:0031581 | hemidesmosome assembly                                                      | 10/7778  | 12/18670  | 0.0040142 | 0.0159037 | 0.009683 |
| BP | GO:0051988 | regulation of attachment of spindle microtubules to kinetochore             | 10/7778  | 12/18670  | 0.0040142 | 0.0159037 | 0.009683 |
| BP | GO:0060707 | trophoblast giant cell differentiation                                      | 10/7778  | 12/18670  | 0.0040142 | 0.0159037 | 0.009683 |
| BP | GO:0060900 | embryonic camera-type eye formation                                         | 10/7778  | 12/18670  | 0.0040142 | 0.0159037 | 0.009683 |
| BP | GO:0070601 | centromeric sister chromatid cohesion                                       | 10/7778  | 12/18670  | 0.0040142 | 0.0159037 | 0.009683 |
| BP | GO:0071481 | cellular response to X-ray                                                  | 10/7778  | 12/18670  | 0.0040142 | 0.0159037 | 0.009683 |
| BP | GO:0072697 | protein localization to cell cortex                                         | 10/7778  | 12/18670  | 0.0040142 | 0.0159037 | 0.009683 |
| BP | GO:0097201 | negative regulation of transcription from RNA polymerase II promoter        | 10/7778  | 12/18670  | 0.0040142 | 0.0159037 | 0.009683 |
| BP | GO:0097284 | hepatocyte apoptotic process                                                | 10/7778  | 12/18670  | 0.0040142 | 0.0159037 | 0.009683 |
| BP | GO:0098885 | modification of postsynaptic actin cytoskeleton                             | 10/7778  | 12/18670  | 0.0040142 | 0.0159037 | 0.009683 |
| BP | GO:0098974 | postsynaptic actin cytoskeleton organization                                | 10/7778  | 12/18670  | 0.0040142 | 0.0159037 | 0.009683 |
| BP | GO:1904816 | positive regulation of protein localization to chromosome, telomeric region | 10/7778  | 12/18670  | 0.0040142 | 0.0159037 | 0.009683 |
| BP | GO:1990173 | protein localization to nucleoplasm                                         | 10/7778  | 12/18670  | 0.0040142 | 0.0159037 | 0.009683 |
| BP | GO:0045005 | DNA-dependent DNA replication maintenance of fidelity                       | 26/7778  | 41/18670  | 0.0040285 | 0.0159406 | 0.009705 |
| BP | GO:0048286 | lung alveolus development                                                   | 26/7778  | 41/18670  | 0.0040285 | 0.0159406 | 0.009705 |
| BP | GO:1903901 | negative regulation of viral life cycle                                     | 48/7778  | 85/18670  | 0.0040862 | 0.016151  | 0.009833 |
| BP | GO:0071333 | cellular response to glucose stimulus                                       | 71/7778  | 133/18670 | 0.0040866 | 0.016151  | 0.009833 |
| BP | GO:0010906 | regulation of glucose metabolic process                                     | 61/7778  | 112/18670 | 0.0041341 | 0.0163287 | 0.009941 |
| BP | GO:0045992 | negative regulation of embryonic development                                | 18/7778  | 26/18670  | 0.0041531 | 0.0163834 | 0.009975 |
| BP | GO:1904353 | regulation of telomere capping                                              | 18/7778  | 26/18670  | 0.0041531 | 0.0163834 | 0.009975 |
| BP | GO:0010824 | regulation of centrosome duplication                                        | 27/7778  | 43/18670  | 0.0041644 | 0.0163978 | 0.009984 |
| BP | GO:0033173 | calcineurin-NFAT signaling cascade                                          | 27/7778  | 43/18670  | 0.0041644 | 0.0163978 | 0.009984 |
| BP | GO:0043616 | keratinocyte proliferation                                                  | 27/7778  | 43/18670  | 0.0041644 | 0.0163978 | 0.009984 |
| BP | GO:0055072 | iron ion homeostasis                                                        | 46/7778  | 81/18670  | 0.0042161 | 0.0165915 | 0.010101 |
| BP | GO:0003151 | outflow tract morphogenesis                                                 | 45/7778  | 79/18670  | 0.0042773 | 0.0168102 | 0.010235 |
| BP | GO:0032456 | endocytic recycling                                                         | 28/7778  | 45/18670  | 0.0042795 | 0.0168102 | 0.010235 |
| BP | GO:0035987 | endodermal cell differentiation                                             | 28/7778  | 45/18670  | 0.0042795 | 0.0168102 | 0.010235 |
| BP | GO:0050804 | modulation of chemical synaptic transmission                                | 209/7778 | 436/18670 | 0.0042964 | 0.0168663 | 0.010269 |
| BP | GO:0035265 | organ growth                                                                | 104/7778 | 204/18670 | 0.0043072 | 0.0168984 | 0.010288 |
| BP | GO:0030261 | chromosome condensation                                                     | 29/7778  | 47/18670  | 0.0043753 | 0.0171447 | 0.010438 |
| BP | GO:1903580 | positive regulation of ATP metabolic process                                | 29/7778  | 47/18670  | 0.0043753 | 0.0171447 | 0.010438 |
| BP | GO:0033002 | muscle cell proliferation                                                   | 120/7778 | 239/18670 | 0.0044426 | 0.0173977 | 0.010592 |
| BP | GO:0050852 | T cell receptor signaling pathway                                           | 103/7778 | 202/18670 | 0.0044477 | 0.0174071 | 0.010598 |
| BP | GO:0097300 | programmed necrotic cell death                                              | 30/7778  | 49/18670  | 0.0044532 | 0.0174182 | 0.010605 |
| BP | GO:0031122 | cytoplasmic microtubule organization                                        | 32/7778  | 53/18670  | 0.0045608 | 0.0178066 | 0.010841 |
| BP | GO:0038066 | p38MAPK cascade                                                             | 32/7778  | 53/18670  | 0.0045608 | 0.0178066 | 0.010841 |
| BP | GO:0098586 | cellular response to virus                                                  | 32/7778  | 53/18670  | 0.0045608 | 0.0178066 | 0.010841 |
| BP | GO:0071168 | protein localization to chromatin                                           | 19/7778  | 28/18670  | 0.0045859 | 0.0178938 | 0.010894 |
| BP | GO:0016233 | telomere capping                                                            | 33/7778  | 55/18670  | 0.0045932 | 0.0179004 | 0.010898 |
| BP | GO:0048016 | inositol phosphate-mediated signaling                                       | 33/7778  | 55/18670  | 0.0045932 | 0.0179004 | 0.010898 |

|    |            |                                                                                       |          |           |           |           |          |
|----|------------|---------------------------------------------------------------------------------------|----------|-----------|-----------|-----------|----------|
| BP | GO:0042982 | amyloid precursor protein metabolic process                                           | 37/7778  | 63/18670  | 0.0046075 | 0.0179454 | 0.010926 |
| BP | GO:0002218 | activation of innate immune response                                                  | 75/7778  | 142/18670 | 0.0046162 | 0.0179659 | 0.010938 |
| BP | GO:0043388 | positive regulation of DNA binding                                                    | 35/7778  | 59/18670  | 0.0046212 | 0.0179659 | 0.010938 |
| BP | GO:0071806 | protein transmembrane transport                                                       | 35/7778  | 59/18670  | 0.0046212 | 0.0179659 | 0.010938 |
| BP | GO:0021549 | cerebellum development                                                                | 56/7778  | 102/18670 | 0.0046646 | 0.018124  | 0.011035 |
| BP | GO:0035282 | segmentation                                                                          | 55/7778  | 100/18670 | 0.0047742 | 0.0184482 | 0.011232 |
| BP | GO:0006337 | nucleosome disassembly                                                                | 14/7778  | 19/18670  | 0.0047767 | 0.0184482 | 0.011232 |
| BP | GO:0010888 | negative regulation of lipid storage                                                  | 14/7778  | 19/18670  | 0.0047767 | 0.0184482 | 0.011232 |
| BP | GO:0034063 | stress granule assembly                                                               | 14/7778  | 19/18670  | 0.0047767 | 0.0184482 | 0.011232 |
| BP | GO:0036303 | lymph vessel morphogenesis                                                            | 14/7778  | 19/18670  | 0.0047767 | 0.0184482 | 0.011232 |
| BP | GO:0051546 | keratinocyte migration                                                                | 14/7778  | 19/18670  | 0.0047767 | 0.0184482 | 0.011232 |
| BP | GO:0072074 | kidney mesenchyme development                                                         | 14/7778  | 19/18670  | 0.0047767 | 0.0184482 | 0.011232 |
| BP | GO:0090201 | negative regulation of release of cytochrome c from mitochondria                      | 14/7778  | 19/18670  | 0.0047767 | 0.0184482 | 0.011232 |
| BP | GO:1902176 | negative regulation of oxidative stress-induced intrinsic apoptotic signaling pathway | 14/7778  | 19/18670  | 0.0047767 | 0.0184482 | 0.011232 |
| BP | GO:2000042 | negative regulation of double-strand break repair via homologous recombination        | 14/7778  | 19/18670  | 0.0047767 | 0.0184482 | 0.011232 |
| BP | GO:1901861 | regulation of muscle tissue development                                               | 81/7778  | 155/18670 | 0.0048257 | 0.0186262 | 0.011134 |
| BP | GO:0099177 | regulation of trans-synaptic signaling                                                | 209/7778 | 437/18670 | 0.004877  | 0.0188129 | 0.011454 |
| BP | GO:0046631 | alpha-beta T cell activation                                                          | 73/7778  | 138/18670 | 0.0048962 | 0.0188757 | 0.011492 |
| BP | GO:0001782 | B cell homeostasis                                                                    | 20/7778  | 30/18670  | 0.0049731 | 0.019115  | 0.011638 |
| BP | GO:0032607 | interferon-alpha production                                                           | 20/7778  | 30/18670  | 0.0049731 | 0.019115  | 0.011638 |
| BP | GO:0044788 | modulation by host of viral process                                                   | 20/7778  | 30/18670  | 0.0049731 | 0.019115  | 0.011638 |
| BP | GO:1901889 | negative regulation of cell junction assembly                                         | 20/7778  | 30/18670  | 0.0049731 | 0.019115  | 0.011638 |
| BP | GO:1904837 | beta-catenin-TCF complex assembly                                                     | 20/7778  | 30/18670  | 0.0049731 | 0.019115  | 0.011638 |
| BP | GO:0071326 | cellular response to monosaccharide stimulus                                          | 72/7778  | 136/18670 | 0.005042  | 0.0193682 | 0.011792 |
| BP | GO:0002761 | regulation of myeloid leukocyte differentiation                                       | 63/7778  | 117/18670 | 0.0050951 | 0.0195606 | 0.011909 |
| BP | GO:1903039 | positive regulation of leukocyte cell-cell adhesion                                   | 110/7778 | 218/18670 | 0.005145  | 0.0197405 | 0.012019 |
| BP | GO:0032355 | response to estradiol                                                                 | 71/7778  | 134/18670 | 0.0051917 | 0.0199079 | 0.012121 |
| BP | GO:0051092 | positive regulation of NF-kappaB transcription factor activity                        | 78/7778  | 149/18670 | 0.0052893 | 0.0202698 | 0.012341 |
| BP | GO:0046949 | fatty-acyl-CoA biosynthetic process                                                   | 21/7778  | 32/18670  | 0.005315  | 0.0203321 | 0.012379 |
| BP | GO:0051085 | chaperone cofactor-dependent protein refolding                                        | 21/7778  | 32/18670  | 0.005315  | 0.0203321 | 0.012379 |
| BP | GO:0060325 | face morphogenesis                                                                    | 21/7778  | 32/18670  | 0.005315  | 0.0203321 | 0.012379 |
| BP | GO:0046883 | regulation of hormone secretion                                                       | 130/7778 | 262/18670 | 0.0053273 | 0.0203647 | 0.012399 |
| BP | GO:0042475 | odontogenesis of dentin-containing tooth                                              | 50/7778  | 90/18670  | 0.0053299 | 0.0203647 | 0.012399 |
| BP | GO:0044782 | cilium organization                                                                   | 185/7778 | 384/18670 | 0.0053453 | 0.0204004 | 0.01242  |
| BP | GO:0055007 | cardiac muscle cell differentiation                                                   | 70/7778  | 132/18670 | 0.0053455 | 0.0204004 | 0.01242  |
| BP | GO:0021987 | cerebral cortex development                                                           | 61/7778  | 113/18670 | 0.0053757 | 0.0205034 | 0.012483 |
| BP | GO:0022404 | molting cycle process                                                                 | 49/7778  | 88/18670  | 0.005441  | 0.0207157 | 0.012612 |
| BP | GO:0022405 | hair cycle process                                                                    | 49/7778  | 88/18670  | 0.005441  | 0.0207157 | 0.012612 |
| BP | GO:2000177 | regulation of neural precursor cell proliferation                                     | 49/7778  | 88/18670  | 0.005441  | 0.0207157 | 0.012612 |
| BP | GO:1904019 | epithelial cell apoptotic process                                                     | 60/7778  | 111/18670 | 0.0055202 | 0.0210048 | 0.012788 |
| BP | GO:0006099 | tricarboxylic acid cycle                                                              | 22/7778  | 34/18670  | 0.0056132 | 0.0212615 | 0.012945 |
| BP | GO:0010765 | positive regulation of sodium ion transport                                           | 22/7778  | 34/18670  | 0.0056132 | 0.0212615 | 0.012945 |
| BP | GO:0018196 | peptidyl-asparagine modification                                                      | 22/7778  | 34/18670  | 0.0056132 | 0.0212615 | 0.012945 |
| BP | GO:0033120 | positive regulation of RNA splicing                                                   | 22/7778  | 34/18670  | 0.0056132 | 0.0212615 | 0.012945 |
| BP | GO:0045738 | negative regulation of DNA repair                                                     | 22/7778  | 34/18670  | 0.0056132 | 0.0212615 | 0.012945 |
| BP | GO:0031498 | chromatin disassembly                                                                 | 15/7778  | 21/18670  | 0.0056174 | 0.0212615 | 0.012945 |
| BP | GO:0032986 | protein-DNA complex disassembly                                                       | 15/7778  | 21/18670  | 0.0056174 | 0.0212615 | 0.012945 |
| BP | GO:0035162 | embryonic hemopoiesis                                                                 | 15/7778  | 21/18670  | 0.0056174 | 0.0212615 | 0.012945 |
| BP | GO:2000737 | negative regulation of stem cell differentiation                                      | 15/7778  | 21/18670  | 0.0056174 | 0.0212615 | 0.012945 |
| BP | GO:0006119 | oxidative phosphorylation                                                             | 76/7778  | 145/18670 | 0.0056219 | 0.0212662 | 0.012948 |
| BP | GO:0071826 | ribonucleoprotein complex subunit organization                                        | 118/7778 | 236/18670 | 0.0056363 | 0.0213082 | 0.012973 |
| BP | GO:0006368 | transcription elongation from RNA polymerase II promoter                              | 47/7778  | 84/18670  | 0.005661  | 0.0213135 | 0.012976 |
| BP | GO:0010595 | positive regulation of endothelial cell migration                                     | 68/7778  | 128/18670 | 0.0056655 | 0.0213135 | 0.012976 |
| BP | GO:0046606 | negative regulation of centrosome cycle                                               | 11/7778  | 14/18670  | 0.0056708 | 0.0213135 | 0.012976 |
| BP | GO:0051547 | regulation of keratinocyte migration                                                  | 11/7778  | 14/18670  | 0.0056708 | 0.0213135 | 0.012976 |
| BP | GO:0051645 | Golgi localization                                                                    | 11/7778  | 14/18670  | 0.0056708 | 0.0213135 | 0.012976 |
| BP | GO:0099188 | postsynaptic cytoskeleton organization                                                | 11/7778  | 14/18670  | 0.0056708 | 0.0213135 | 0.012976 |
| BP | GO:0110154 | RNA decapping                                                                         | 11/7778  | 14/18670  | 0.0056708 | 0.0213135 | 0.012976 |
| BP | GO:0110156 | methylguanosine-cap decapping                                                         | 11/7778  | 14/18670  | 0.0056708 | 0.0213135 | 0.012976 |
| BP | GO:1901722 | regulation of cell proliferation involved in kidney development                       | 11/7778  | 14/18670  | 0.0056708 | 0.0213135 | 0.012976 |
| BP | GO:1904814 | regulation of protein localization to chromosome, telomeric region                    | 11/7778  | 14/18670  | 0.0056708 | 0.0213135 | 0.012976 |
| BP | GO:0006361 | transcription initiation from RNA polymerase I promoter                               | 23/7778  | 36/18670  | 0.0058699 | 0.0220491 | 0.013424 |
| BP | GO:0008593 | regulation of Notch signaling pathway                                                 | 57/7778  | 105/18670 | 0.0059699 | 0.0223983 | 0.013637 |
| BP | GO:0032006 | regulation of TOR signaling                                                           | 57/7778  | 105/18670 | 0.0059699 | 0.0223983 | 0.013637 |
| BP | GO:0010827 | regulation of glucose transmembrane transport                                         | 44/7778  | 78/18670  | 0.0059791 | 0.0224067 | 0.013642 |
| BP | GO:0021954 | central nervous system neuron development                                             | 44/7778  | 78/18670  | 0.0059791 | 0.0224067 | 0.013642 |
| BP | GO:0071695 | anatomical structure maturation                                                       | 116/7778 | 232/18670 | 0.0060158 | 0.0225314 | 0.013718 |
| BP | GO:0045454 | cell redox homeostasis                                                                | 43/7778  | 76/18670  | 0.00608   | 0.0227484 | 0.01385  |
| BP | GO:0006084 | acetyl-CoA metabolic process                                                          | 24/7778  | 38/18670  | 0.0060879 | 0.0227484 | 0.01385  |
| BP | GO:0007223 | Wnt signaling pathway, calcium modulating pathway                                     | 24/7778  | 38/18670  | 0.0060879 | 0.0227484 | 0.01385  |
| BP | GO:0046329 | negative regulation of JNK cascade                                                    | 24/7778  | 38/18670  | 0.0060879 | 0.0227484 | 0.01385  |
| BP | GO:0021543 | pallium development                                                                   | 87/7778  | 169/18670 | 0.0060965 | 0.0227674 | 0.013862 |
| BP | GO:0007584 | response to nutrient                                                                  | 110/7778 | 219/18670 | 0.0061497 | 0.0229527 | 0.013974 |
| BP | GO:1903532 | positive regulation of secretion by cell                                              | 193/7778 | 403/18670 | 0.0061721 | 0.023023  | 0.014017 |
| BP | GO:1900076 | regulation of cellular response to insulin stimulus                                   | 42/7778  | 74/18670  | 0.0061774 | 0.0230293 | 0.014021 |
| BP | GO:0008156 | negative regulation of DNA replication                                                | 25/7778  | 40/18670  | 0.0062699 | 0.0233474 | 0.014215 |
| BP | GO:0090184 | positive regulation of kidney development                                             | 25/7778  | 40/18670  | 0.0062699 | 0.0233474 | 0.014215 |
| BP | GO:0022408 | negative regulation of cell-cell adhesion                                             | 92/7778  | 180/18670 | 0.0063364 | 0.023581  | 0.014357 |
| BP | GO:0010675 | regulation of cellular carbohydrate metabolic process                                 | 72/7778  | 137/18670 | 0.0063484 | 0.0236045 | 0.014371 |
| BP | GO:0072089 | stem cell proliferation                                                               | 64/7778  | 120/18670 | 0.0063568 | 0.0236045 | 0.014371 |
| BP | GO:0034121 | regulation of toll-like receptor signaling pathway                                    | 40/7778  | 70/18670  | 0.0063589 | 0.0236045 | 0.014371 |
| BP | GO:0016202 | regulation of striated muscle tissue development                                      | 79/7778  | 152/18670 | 0.0063749 | 0.0236045 | 0.014371 |
| BP | GO:0006297 | nucleotide-excision repair, DNA gap filling                                           | 16/7778  | 23/18670  | 0.0063756 | 0.0236045 | 0.014371 |
| BP | GO:0016578 | histone deubiquitination                                                              | 16/7778  | 23/18670  | 0.0063756 | 0.0236045 | 0.014371 |
| BP | GO:0090140 | regulation of mitochondrial fission                                                   | 16/7778  | 23/18670  | 0.0063756 | 0.0236045 | 0.014371 |
| BP | GO:1903429 | regulation of cell maturation                                                         | 16/7778  | 23/18670  | 0.0063756 | 0.0236045 | 0.014371 |
| BP | GO:2000050 | regulation of non-canonical Wnt signaling pathway                                     | 16/7778  | 23/18670  | 0.0063756 | 0.0236045 | 0.014371 |
| BP | GO:0006509 | membrane protein ectodomain proteolysis                                               | 26/7778  | 42/18670  | 0.0064189 | 0.0237238 | 0.014444 |
| BP | GO:0010559 | regulation of glycoprotein biosynthetic process                                       | 26/7778  | 42/18670  | 0.0064189 | 0.0237238 | 0.014444 |
| BP | GO:0090503 | RNA phosphodiester bond hydrolysis, exonucleolytic                                    | 26/7778  | 42/18670  | 0.0064189 | 0.0237238 | 0.014444 |
| BP | GO:0010812 | negative regulation of cell-substrate adhesion                                        | 39/7778  | 68/18670  | 0.0064414 | 0.0237932 | 0.014486 |
| BP | GO:0030072 | peptide hormone secretion                                                             | 124/7778 | 250/18670 | 0.0064741 | 0.0239004 | 0.014551 |



|    |            |                                                                                     |          |           |           |           |          |
|----|------------|-------------------------------------------------------------------------------------|----------|-----------|-----------|-----------|----------|
| BP | GO:0051785 | positive regulation of nuclear division                                             | 38/7778  | 66/18670  | 0.0065172 | 0.0240223 | 0.014626 |
| BP | GO:0003197 | endocardial cushion development                                                     | 27/7778  | 44/18670  | 0.0065376 | 0.0240223 | 0.014626 |
| BP | GO:0006378 | mRNA polyadenylation                                                                | 27/7778  | 44/18670  | 0.0065376 | 0.0240223 | 0.014626 |
| BP | GO:0009124 | nucleoside monophosphate biosynthetic process                                       | 27/7778  | 44/18670  | 0.0065376 | 0.0240223 | 0.014626 |
| BP | GO:0010828 | positive regulation of glucose transmembrane transport                              | 27/7778  | 44/18670  | 0.0065376 | 0.0240223 | 0.014626 |
| BP | GO:0045910 | negative regulation of DNA recombination                                            | 27/7778  | 44/18670  | 0.0065376 | 0.0240223 | 0.014626 |
| BP | GO:0070266 | neurotrophic process                                                                | 27/7778  | 44/18670  | 0.0065376 | 0.0240223 | 0.014626 |
| BP | GO:0070897 | transcription preinitiation complex assembly                                        | 27/7778  | 44/18670  | 0.0065376 | 0.0240223 | 0.014626 |
| BP | GO:0048593 | camera-type eye morphogenesis                                                       | 63/7778  | 118/18670 | 0.0065407 | 0.0240223 | 0.014626 |
| BP | GO:0043297 | apical junction assembly                                                            | 37/7778  | 64/18670  | 0.0065854 | 0.024159  | 0.014709 |
| BP | GO:0043550 | regulation of lipid kinase activity                                                 | 37/7778  | 64/18670  | 0.0065854 | 0.024159  | 0.014709 |
| BP | GO:0042775 | mitochondrial ATP synthesis coupled electron transport                              | 53/7778  | 97/18670  | 0.0066041 | 0.0242137 | 0.014742 |
| BP | GO:0006221 | pyrimidine nucleotide biosynthetic process                                          | 28/7778  | 46/18670  | 0.0066289 | 0.0242357 | 0.014755 |
| BP | GO:0032527 | protein exit from endoplasmic reticulum                                             | 28/7778  | 46/18670  | 0.0066289 | 0.0242357 | 0.014755 |
| BP | GO:0035088 | establishment or maintenance of apical/basal cell polarity                          | 28/7778  | 46/18670  | 0.0066289 | 0.0242357 | 0.014755 |
| BP | GO:0061245 | establishment or maintenance of bipolar cell polarity                               | 28/7778  | 46/18670  | 0.0066289 | 0.0242357 | 0.014755 |
| BP | GO:0071675 | regulation of mononuclear cell migration                                            | 28/7778  | 46/18670  | 0.0066289 | 0.0242357 | 0.014755 |
| BP | GO:0002562 | somatic diversification of immune receptors via germline recombination              | 36/7778  | 62/18670  | 0.0066448 | 0.0242663 | 0.014774 |
| BP | GO:0016444 | somatic cell DNA recombination                                                      | 36/7778  | 62/18670  | 0.0066448 | 0.0242663 | 0.014774 |
| BP | GO:0046324 | regulation of glucose import                                                        | 35/7778  | 60/18670  | 0.0066942 | 0.0244189 | 0.014867 |
| BP | GO:1902808 | positive regulation of cell cycle G1/S phase transition                             | 35/7778  | 60/18670  | 0.0066942 | 0.0244189 | 0.014867 |
| BP | GO:0030520 | intracellular estrogen receptor signaling pathway                                   | 34/7778  | 58/18670  | 0.0067322 | 0.0245436 | 0.014943 |
| BP | GO:0001706 | endoderm formation                                                                  | 30/7778  | 50/18670  | 0.006739  | 0.0245548 | 0.01495  |
| BP | GO:1902017 | regulation of cilium assembly                                                       | 33/7778  | 56/18670  | 0.0067574 | 0.024605  | 0.01498  |
| BP | GO:2000677 | regulation of transcription regulatory region DNA binding                           | 31/7778  | 52/18670  | 0.0067626 | 0.024605  | 0.01498  |
| BP | GO:0002702 | positive regulation of production of molecular mediator of immune response          | 52/7778  | 95/18670  | 0.006768  | 0.024605  | 0.01498  |
| BP | GO:0002720 | positive regulation of cytokine production involved in immune response              | 32/7778  | 54/18670  | 0.0067681 | 0.024605  | 0.01498  |
| BP | GO:0045446 | endothelial cell differentiation                                                    | 61/7778  | 114/18670 | 0.006922  | 0.0251502 | 0.015312 |
| BP | GO:0055123 | digestive system development                                                        | 76/7778  | 146/18670 | 0.0070017 | 0.0254255 | 0.01548  |
| BP | GO:0007026 | negative regulation of microtubule depolymerization                                 | 17/7778  | 25/18670  | 0.0070475 | 0.0255055 | 0.015529 |
| BP | GO:0008334 | histone mRNA metabolic process                                                      | 17/7778  | 25/18670  | 0.0070475 | 0.0255055 | 0.015529 |
| BP | GO:0009299 | mRNA transcription                                                                  | 17/7778  | 25/18670  | 0.0070475 | 0.0255055 | 0.015529 |
| BP | GO:0035459 | vesicle cargo loading                                                               | 17/7778  | 25/18670  | 0.0070475 | 0.0255055 | 0.015529 |
| BP | GO:0046856 | phosphatidylinositol dephosphorylation                                              | 17/7778  | 25/18670  | 0.0070475 | 0.0255055 | 0.015529 |
| BP | GO:2000104 | negative regulation of DNA-dependent DNA replication                                | 17/7778  | 25/18670  | 0.0070475 | 0.0255055 | 0.015529 |
| BP | GO:0045639 | positive regulation of myeloid cell differentiation                                 | 50/7778  | 91/18670  | 0.0071008 | 0.0256841 | 0.015637 |
| BP | GO:0007626 | locomotory behavior                                                                 | 100/7778 | 198/18670 | 0.0071252 | 0.0257578 | 0.015682 |
| BP | GO:0007043 | cell-cell junction assembly                                                         | 68/7778  | 129/18670 | 0.0071634 | 0.0258816 | 0.015758 |
| BP | GO:0006086 | acetyl-CoA biosynthetic process from pyruvate                                       | 12/7778  | 16/18670  | 0.0072205 | 0.0259568 | 0.015803 |
| BP | GO:0044794 | positive regulation by host of viral process                                        | 12/7778  | 16/18670  | 0.0072205 | 0.0259568 | 0.015803 |
| BP | GO:0044827 | modulation by host of viral genome replication                                      | 12/7778  | 16/18670  | 0.0072205 | 0.0259568 | 0.015803 |
| BP | GO:0055119 | relaxation of cardiac muscle                                                        | 12/7778  | 16/18670  | 0.0072205 | 0.0259568 | 0.015803 |
| BP | GO:0061684 | chaperone-mediated autophagy                                                        | 12/7778  | 16/18670  | 0.0072205 | 0.0259568 | 0.015803 |
| BP | GO:0072176 | nephric duct development                                                            | 12/7778  | 16/18670  | 0.0072205 | 0.0259568 | 0.015803 |
| BP | GO:0080182 | histone H3-K4 trimethylation                                                        | 12/7778  | 16/18670  | 0.0072205 | 0.0259568 | 0.015803 |
| BP | GO:0097067 | cellular response to thyroid hormone stimulus                                       | 12/7778  | 16/18670  | 0.0072205 | 0.0259568 | 0.015803 |
| BP | GO:1904294 | positive regulation of ERAD pathway                                                 | 12/7778  | 16/18670  | 0.0072205 | 0.0259568 | 0.015803 |
| BP | GO:0006024 | glycosaminoglycan biosynthetic process                                              | 59/7778  | 110/18670 | 0.0073215 | 0.0263053 | 0.016016 |
| BP | GO:0030073 | insulin secretion                                                                   | 104/7778 | 207/18670 | 0.0074821 | 0.0268673 | 0.016358 |
| BP | GO:0009144 | purine nucleoside triphosphate metabolic process                                    | 47/7778  | 85/18670  | 0.0076088 | 0.027275  | 0.016606 |
| BP | GO:0009798 | axis specification                                                                  | 47/7778  | 85/18670  | 0.0076088 | 0.027275  | 0.016606 |
| BP | GO:0006735 | NADH regeneration                                                                   | 18/7778  | 27/18670  | 0.0076338 | 0.027275  | 0.016606 |
| BP | GO:0032201 | telomere maintenance via semi-conservative replication                              | 18/7778  | 27/18670  | 0.0076338 | 0.027275  | 0.016606 |
| BP | GO:0034067 | protein localization to Golgi apparatus                                             | 18/7778  | 27/18670  | 0.0076338 | 0.027275  | 0.016606 |
| BP | GO:0039528 | cytoplasmic pattern recognition receptor signaling pathway in response to stimulus  | 18/7778  | 27/18670  | 0.0076338 | 0.027275  | 0.016606 |
| BP | GO:0061621 | canonical glycolysis                                                                | 18/7778  | 27/18670  | 0.0076338 | 0.027275  | 0.016606 |
| BP | GO:0061718 | glucose catabolic process to pyruvate                                               | 18/7778  | 27/18670  | 0.0076338 | 0.027275  | 0.016606 |
| BP | GO:0070199 | establishment of protein localization to chromosome                                 | 18/7778  | 27/18670  | 0.0076338 | 0.027275  | 0.016606 |
| BP | GO:0002062 | chondrocyte differentiation                                                         | 65/7778  | 123/18670 | 0.0078381 | 0.0279894 | 0.017041 |
| BP | GO:0030168 | platelet activation                                                                 | 79/7778  | 153/18670 | 0.0078686 | 0.0280829 | 0.017098 |
| BP | GO:0008064 | regulation of actin polymerization or depolymerization                              | 91/7778  | 179/18670 | 0.0079353 | 0.0283054 | 0.017233 |
| BP | GO:0010923 | negative regulation of phosphatase activity                                         | 56/7778  | 104/18670 | 0.0079552 | 0.0283605 | 0.017267 |
| BP | GO:0001570 | vasculogenesis                                                                      | 44/7778  | 79/18670  | 0.0081184 | 0.0285861 | 0.017404 |
| BP | GO:0000727 | double-strand break repair via break-induced replication                            | 9/7778   | 11/18670  | 0.0081368 | 0.0285861 | 0.017404 |
| BP | GO:0002730 | regulation of dendritic cell cytokine production                                    | 9/7778   | 11/18670  | 0.0081368 | 0.0285861 | 0.017404 |
| BP | GO:0019042 | viral latency                                                                       | 9/7778   | 11/18670  | 0.0081368 | 0.0285861 | 0.017404 |
| BP | GO:0030422 | production of siRNA involved in RNA interference                                    | 9/7778   | 11/18670  | 0.0081368 | 0.0285861 | 0.017404 |
| BP | GO:0032060 | bleb assembly                                                                       | 9/7778   | 11/18670  | 0.0081368 | 0.0285861 | 0.017404 |
| BP | GO:0033148 | positive regulation of intracellular estrogen receptor signaling pathway            | 9/7778   | 11/18670  | 0.0081368 | 0.0285861 | 0.017404 |
| BP | GO:0035404 | histone-serine phosphorylation                                                      | 9/7778   | 11/18670  | 0.0081368 | 0.0285861 | 0.017404 |
| BP | GO:0043619 | regulation of transcription from RNA polymerase II promoter in response to stimulus | 9/7778   | 11/18670  | 0.0081368 | 0.0285861 | 0.017404 |
| BP | GO:0045793 | positive regulation of cell size                                                    | 9/7778   | 11/18670  | 0.0081368 | 0.0285861 | 0.017404 |
| BP | GO:0048096 | chromatin-mediated maintenance of transcription                                     | 9/7778   | 11/18670  | 0.0081368 | 0.0285861 | 0.017404 |
| BP | GO:0061307 | cardiac neural crest cell differentiation involved in heart development             | 9/7778   | 11/18670  | 0.0081368 | 0.0285861 | 0.017404 |
| BP | GO:0061308 | cardiac neural crest cell development involved in heart development                 | 9/7778   | 11/18670  | 0.0081368 | 0.0285861 | 0.017404 |
| BP | GO:0061314 | Notch signaling involved in heart development                                       | 9/7778   | 11/18670  | 0.0081368 | 0.0285861 | 0.017404 |
| BP | GO:0070203 | regulation of establishment of protein localization to telomere                     | 9/7778   | 11/18670  | 0.0081368 | 0.0285861 | 0.017404 |
| BP | GO:1900102 | negative regulation of endoplasmic reticulum unfolded protein response              | 9/7778   | 11/18670  | 0.0081368 | 0.0285861 | 0.017404 |
| BP | GO:1901096 | regulation of autophagosome maturation                                              | 9/7778   | 11/18670  | 0.0081368 | 0.0285861 | 0.017404 |
| BP | GO:2000786 | positive regulation of autophagosome assembly                                       | 9/7778   | 11/18670  | 0.0081368 | 0.0285861 | 0.017404 |
| BP | GO:2001241 | positive regulation of extrinsic apoptotic signaling pathway in absence of ligand   | 9/7778   | 11/18670  | 0.0081368 | 0.0285861 | 0.017404 |
| BP | GO:0010575 | positive regulation of vascular endothelial growth factor production                | 19/7778  | 29/18670  | 0.0081383 | 0.0285861 | 0.017404 |
| BP | GO:0014044 | Schwann cell development                                                            | 19/7778  | 29/18670  | 0.0081383 | 0.0285861 | 0.017404 |
| BP | GO:0030970 | retrograde protein transport, ER to cytosol                                         | 19/7778  | 29/18670  | 0.0081383 | 0.0285861 | 0.017404 |
| BP | GO:0031063 | regulation of histone deacetylation                                                 | 19/7778  | 29/18670  | 0.0081383 | 0.0285861 | 0.017404 |
| BP | GO:0060441 | epithelial tube branching involved in lung morphogenesis                            | 19/7778  | 29/18670  | 0.0081383 | 0.0285861 | 0.017404 |
| BP | GO:0061099 | negative regulation of protein tyrosine kinase activity                             | 19/7778  | 29/18670  | 0.0081383 | 0.0285861 | 0.017404 |
| BP | GO:0090162 | establishment of epithelial cell polarity                                           | 19/7778  | 29/18670  | 0.0081383 | 0.0285861 | 0.017404 |
| BP | GO:1903513 | endoplasmic reticulum to cytosol transport                                          | 19/7778  | 29/18670  | 0.0081383 | 0.0285861 | 0.017404 |
| BP | GO:0048332 | mesoderm morphogenesis                                                              | 43/7778  | 77/18670  | 0.0082865 | 0.0290907 | 0.017711 |
| BP | GO:0051047 | positive regulation of secretion                                                    | 203/7778 | 428/18670 | 0.0084355 | 0.0295978 | 0.01802  |
| BP | GO:0002200 | somatic diversification of immune receptors                                         | 42/7778  | 75/18670  | 0.0084526 | 0.0296415 | 0.018047 |

|    |            |                                                                        |          |           |           |           |          |
|----|------------|------------------------------------------------------------------------|----------|-----------|-----------|-----------|----------|
| BP | GO:0007411 | axon guidance                                                          | 135/7778 | 276/18670 | 0.0084578 | 0.0296438 | 0.018048 |
| BP | GO:0006482 | protein demethylation                                                  | 20/7778  | 31/18670  | 0.0085664 | 0.0299812 | 0.018254 |
| BP | GO:0008214 | protein dealkylation                                                   | 20/7778  | 31/18670  | 0.0085664 | 0.0299812 | 0.018254 |
| BP | GO:0002902 | regulation of B cell apoptotic process                                 | 13/7778  | 18/18670  | 0.0086146 | 0.0299812 | 0.018254 |
| BP | GO:0006349 | regulation of gene expression by genetic imprinting                    | 13/7778  | 18/18670  | 0.0086146 | 0.0299812 | 0.018254 |
| BP | GO:0007252 | I-kappaB phosphorylation                                               | 13/7778  | 18/18670  | 0.0086146 | 0.0299812 | 0.018254 |
| BP | GO:0009048 | dosage compensation by inactivation of X chromosome                    | 13/7778  | 18/18670  | 0.0086146 | 0.0299812 | 0.018254 |
| BP | GO:0010766 | negative regulation of sodium ion transport                            | 13/7778  | 18/18670  | 0.0086146 | 0.0299812 | 0.018254 |
| BP | GO:0019054 | modulation by virus of host cellular process                           | 13/7778  | 18/18670  | 0.0086146 | 0.0299812 | 0.018254 |
| BP | GO:0021756 | striatum development                                                   | 13/7778  | 18/18670  | 0.0086146 | 0.0299812 | 0.018254 |
| BP | GO:0031293 | membrane protein intracellular domain proteolysis                      | 13/7778  | 18/18670  | 0.0086146 | 0.0299812 | 0.018254 |
| BP | GO:0035994 | response to muscle stretch                                             | 13/7778  | 18/18670  | 0.0086146 | 0.0299812 | 0.018254 |
| BP | GO:0043555 | regulation of translation in response to stress                        | 13/7778  | 18/18670  | 0.0086146 | 0.0299812 | 0.018254 |
| BP | GO:0061323 | cell proliferation involved in heart morphogenesis                     | 13/7778  | 18/18670  | 0.0086146 | 0.0299812 | 0.018254 |
| BP | GO:0042773 | ATP synthesis coupled electron transport                               | 53/7778  | 98/18670  | 0.0086294 | 0.0300003 | 0.018265 |
| BP | GO:0045807 | positive regulation of endocytosis                                     | 53/7778  | 98/18670  | 0.0086294 | 0.0300003 | 0.018265 |
| BP | GO:0033692 | cellular polysaccharide biosynthetic process                           | 40/7778  | 71/18670  | 0.008776  | 0.0304935 | 0.018565 |
| BP | GO:0006023 | aminoglycan biosynthetic process                                       | 61/7778  | 115/18670 | 0.0088288 | 0.0306603 | 0.018667 |
| BP | GO:0010039 | response to iron ion                                                   | 21/7778  | 33/18670  | 0.008924  | 0.0309077 | 0.018818 |
| BP | GO:0018279 | protein N-linked glycosylation via asparagine                          | 21/7778  | 33/18670  | 0.008924  | 0.0309077 | 0.018818 |
| BP | GO:0030513 | positive regulation of BMP signaling pathway                           | 21/7778  | 33/18670  | 0.008924  | 0.0309077 | 0.018818 |
| BP | GO:0036314 | response to sterol                                                     | 21/7778  | 33/18670  | 0.008924  | 0.0309077 | 0.018818 |
| BP | GO:0048536 | spleen development                                                     | 21/7778  | 33/18670  | 0.008924  | 0.0309077 | 0.018818 |
| BP | GO:1902414 | protein localization to cell junction                                  | 51/7778  | 94/18670  | 0.0091003 | 0.0314846 | 0.019169 |
| BP | GO:1990542 | mitochondrial transmembrane transport                                  | 51/7778  | 94/18670  | 0.0091003 | 0.0314846 | 0.019169 |
| BP | GO:0030198 | extracellular matrix organization                                      | 176/7778 | 368/18670 | 0.0091586 | 0.0316691 | 0.019281 |
| BP | GO:0000266 | mitochondrial fission                                                  | 22/7778  | 35/18670  | 0.0092174 | 0.0318213 | 0.019374 |
| BP | GO:0003203 | endocardial cushion morphogenesis                                      | 22/7778  | 35/18670  | 0.0092174 | 0.0318213 | 0.019374 |
| BP | GO:0034142 | toll-like receptor 4 signaling pathway                                 | 22/7778  | 35/18670  | 0.0092174 | 0.0318213 | 0.019374 |
| BP | GO:0060389 | pathway-restricted SMAD protein phosphorylation                        | 37/7778  | 65/18670  | 0.0092254 | 0.0318317 | 0.01938  |
| BP | GO:0048634 | regulation of muscle organ development                                 | 80/7778  | 156/18670 | 0.0093408 | 0.0322129 | 0.019612 |
| BP | GO:0046637 | regulation of alpha-beta T cell differentiation                        | 36/7778  | 63/18670  | 0.0093611 | 0.0322311 | 0.019623 |
| BP | GO:0090181 | regulation of cholesterol metabolic process                            | 36/7778  | 63/18670  | 0.0093611 | 0.0322311 | 0.019623 |
| BP | GO:1904377 | positive regulation of protein localization to cell periphery          | 36/7778  | 63/18670  | 0.0093611 | 0.0322311 | 0.019623 |
| BP | GO:0007431 | salivary gland development                                             | 23/7778  | 37/18670  | 0.0094527 | 0.0325117 | 0.019794 |
| BP | GO:0071542 | dopaminergic neuron differentiation                                    | 23/7778  | 37/18670  | 0.0094527 | 0.0325117 | 0.019794 |
| BP | GO:0007040 | lysosome organization                                                  | 35/7778  | 61/18670  | 0.0094876 | 0.0325794 | 0.019835 |
| BP | GO:0042733 | embryonic digit morphogenesis                                          | 35/7778  | 61/18670  | 0.0094876 | 0.0325794 | 0.019835 |
| BP | GO:0080171 | lytic vacuole organization                                             | 35/7778  | 61/18670  | 0.0094876 | 0.0325794 | 0.019835 |
| BP | GO:0030832 | regulation of actin filament length                                    | 91/7778  | 180/18670 | 0.0095703 | 0.0328459 | 0.019998 |
| BP | GO:0010717 | regulation of epithelial to mesenchymal transition                     | 49/7778  | 90/18670  | 0.0095871 | 0.0328862 | 0.020022 |
| BP | GO:0001885 | endothelial cell development                                           | 34/7778  | 59/18670  | 0.0096031 | 0.0329061 | 0.020034 |
| BP | GO:0070527 | platelet aggregation                                                   | 34/7778  | 59/18670  | 0.0096031 | 0.0329061 | 0.020034 |
| BP | GO:0033146 | regulation of intracellular estrogen receptor signaling pathway        | 24/7778  | 39/18670  | 0.0096359 | 0.0329306 | 0.020049 |
| BP | GO:0033683 | nucleotide-excision repair, DNA incision                               | 24/7778  | 39/18670  | 0.0096359 | 0.0329306 | 0.020049 |
| BP | GO:0038179 | neurotrophin signaling pathway                                         | 24/7778  | 39/18670  | 0.0096359 | 0.0329306 | 0.020049 |
| BP | GO:0043114 | regulation of vascular permeability                                    | 24/7778  | 39/18670  | 0.0096359 | 0.0329306 | 0.020049 |
| BP | GO:0050856 | regulation of T cell receptor signaling pathway                        | 24/7778  | 39/18670  | 0.0096359 | 0.0329306 | 0.020049 |
| BP | GO:0035337 | fatty-acyl-CoA metabolic process                                       | 25/7778  | 41/18670  | 0.0097723 | 0.0332634 | 0.020252 |
| BP | GO:0001541 | ovarian follicle development                                           | 32/7778  | 55/18670  | 0.0097941 | 0.0332634 | 0.020252 |
| BP | GO:0006383 | transcription by RNA polymerase III                                    | 32/7778  | 55/18670  | 0.0097941 | 0.0332634 | 0.020252 |
| BP | GO:0097479 | synaptic vesicle localization                                          | 32/7778  | 55/18670  | 0.0097941 | 0.0332634 | 0.020252 |
| BP | GO:0097485 | neuron projection guidance                                             | 135/7778 | 277/18670 | 0.009805  | 0.0332634 | 0.020252 |
| BP | GO:0098773 | skin epidermis development                                             | 48/7778  | 88/18670  | 0.0098359 | 0.0332634 | 0.020252 |
| BP | GO:0007549 | dosage compensation                                                    | 14/7778  | 20/18670  | 0.0098365 | 0.0332634 | 0.020252 |
| BP | GO:0010560 | positive regulation of glycoprotein biosynthetic process               | 14/7778  | 20/18670  | 0.0098365 | 0.0332634 | 0.020252 |
| BP | GO:0034143 | regulation of toll-like receptor 4 signaling pathway                   | 14/7778  | 20/18670  | 0.0098365 | 0.0332634 | 0.020252 |
| BP | GO:0039529 | RIG-I signaling pathway                                                | 14/7778  | 20/18670  | 0.0098365 | 0.0332634 | 0.020252 |
| BP | GO:0043371 | negative regulation of CD4-positive, alpha-beta T cell differentiation | 14/7778  | 20/18670  | 0.0098365 | 0.0332634 | 0.020252 |
| BP | GO:0048745 | smooth muscle tissue development                                       | 14/7778  | 20/18670  | 0.0098365 | 0.0332634 | 0.020252 |
| BP | GO:0060039 | pericardium development                                                | 14/7778  | 20/18670  | 0.0098365 | 0.0332634 | 0.020252 |
| BP | GO:0060216 | definitive hemopoiesis                                                 | 14/7778  | 20/18670  | 0.0098365 | 0.0332634 | 0.020252 |
| BP | GO:0060261 | positive regulation of transcription initiation from RNA polymerase II | 14/7778  | 20/18670  | 0.0098365 | 0.0332634 | 0.020252 |
| BP | GO:0070262 | peptidyl-serine dephosphorylation                                      | 14/7778  | 20/18670  | 0.0098365 | 0.0332634 | 0.020252 |
| BP | GO:0070932 | histone H3 deacetylation                                               | 14/7778  | 20/18670  | 0.0098365 | 0.0332634 | 0.020252 |
| BP | GO:0097062 | dendritic spine maintenance                                            | 14/7778  | 20/18670  | 0.0098365 | 0.0332634 | 0.020252 |
| BP | GO:0097734 | extracellular exosome biogenesis                                       | 14/7778  | 20/18670  | 0.0098365 | 0.0332634 | 0.020252 |
| BP | GO:1901673 | regulation of mitotic spindle assembly                                 | 14/7778  | 20/18670  | 0.0098365 | 0.0332634 | 0.020252 |
| BP | GO:0032881 | regulation of polysaccharide metabolic process                         | 26/7778  | 43/18670  | 0.009867  | 0.0332967 | 0.020272 |
| BP | GO:0038202 | TORC1 signaling                                                        | 26/7778  | 43/18670  | 0.009867  | 0.0332967 | 0.020272 |
| BP | GO:0045197 | establishment or maintenance of epithelial cell apical/basal polarity  | 26/7778  | 43/18670  | 0.009867  | 0.0332967 | 0.020272 |
| BP | GO:0060612 | adipose tissue development                                             | 26/7778  | 43/18670  | 0.009867  | 0.0332967 | 0.020272 |
| BP | GO:0001954 | positive regulation of cell-matrix adhesion                            | 30/7778  | 51/18670  | 0.0099168 | 0.0333868 | 0.020327 |
| BP | GO:0032007 | negative regulation of TOR signaling                                   | 30/7778  | 51/18670  | 0.0099168 | 0.0333868 | 0.020327 |
| BP | GO:0045599 | negative regulation of fat cell differentiation                        | 30/7778  | 51/18670  | 0.0099168 | 0.0333868 | 0.020327 |
| BP | GO:0031018 | endocrine pancreas development                                         | 27/7778  | 45/18670  | 0.0099248 | 0.0333868 | 0.020327 |
| BP | GO:0044275 | cellular carbohydrate catabolic process                                | 27/7778  | 45/18670  | 0.0099248 | 0.0333868 | 0.020327 |
| BP | GO:0048701 | embryonic cranial skeleton morphogenesis                               | 27/7778  | 45/18670  | 0.0099248 | 0.0333868 | 0.020327 |
| BP | GO:0065002 | intracellular protein transmembrane transport                          | 29/7778  | 49/18670  | 0.009946  | 0.0334013 | 0.020336 |
| BP | GO:1903018 | regulation of glycoprotein metabolic process                           | 29/7778  | 49/18670  | 0.009946  | 0.0334013 | 0.020336 |
| BP | GO:0061383 | trabecula morphogenesis                                                | 28/7778  | 47/18670  | 0.0099499 | 0.0334013 | 0.020336 |
| BP | GO:0070231 | T cell apoptotic process                                               | 28/7778  | 47/18670  | 0.0099499 | 0.0334013 | 0.020336 |
| BP | GO:0001942 | hair follicle development                                              | 47/7778  | 86/18670  | 0.010088  | 0.0338121 | 0.020586 |
| BP | GO:0006919 | activation of cysteine-type endopeptidase activity involved in apoptot | 47/7778  | 86/18670  | 0.010088  | 0.0338121 | 0.020586 |
| BP | GO:0034637 | cellular carbohydrate biosynthetic process                             | 47/7778  | 86/18670  | 0.010088  | 0.0338121 | 0.020586 |
| BP | GO:0051896 | regulation of protein kinase B signaling                               | 120/7778 | 244/18670 | 0.0101443 | 0.0339832 | 0.02069  |
| BP | GO:0006614 | SRP-dependent cotranslational protein targeting to membrane            | 56/7778  | 105/18670 | 0.0102242 | 0.0342329 | 0.020842 |
| BP | GO:0043062 | extracellular structure organization                                   | 176/7778 | 369/18670 | 0.0103877 | 0.0347623 | 0.021164 |
| BP | GO:0050921 | positive regulation of chemotaxis                                      | 70/7778  | 135/18670 | 0.0104874 | 0.0350777 | 0.021356 |
| BP | GO:0008154 | actin polymerization or depolymerization                               | 104/7778 | 209/18670 | 0.0105654 | 0.0353202 | 0.021504 |
| BP | GO:0051494 | negative regulation of cytoskeleton organization                       | 76/7778  | 148/18670 | 0.0106363 | 0.0355391 | 0.021637 |
| BP | GO:0007224 | smoothened signaling pathway                                           | 69/7778  | 133/18670 | 0.0108275 | 0.0359475 | 0.021886 |

|    |            |                                                                         |          |           |           |           |          |
|----|------------|-------------------------------------------------------------------------|----------|-----------|-----------|-----------|----------|
| BP | GO:0055076 | transition metal ion homeostasis                                        | 69/7778  | 133/18670 | 0.0108275 | 0.0359475 | 0.021886 |
| BP | GO:0048259 | regulation of receptor-mediated endocytosis                             | 54/7778  | 101/18670 | 0.0108336 | 0.0359475 | 0.021886 |
| BP | GO:0048661 | positive regulation of smooth muscle cell proliferation                 | 54/7778  | 101/18670 | 0.0108336 | 0.0359475 | 0.021886 |
| BP | GO:0000212 | meiotic spindle organization                                            | 10/7778  | 13/18670  | 0.0108806 | 0.0359475 | 0.021886 |
| BP | GO:0001833 | inner cell mass cell proliferation                                      | 10/7778  | 13/18670  | 0.0108806 | 0.0359475 | 0.021886 |
| BP | GO:0010745 | negative regulation of macrophage derived foam cell differentiation     | 10/7778  | 13/18670  | 0.0108806 | 0.0359475 | 0.021886 |
| BP | GO:0010763 | negative regulation of fibroblast migration                             | 10/7778  | 13/18670  | 0.0108806 | 0.0359475 | 0.021886 |
| BP | GO:0033127 | regulation of histone phosphorylation                                   | 10/7778  | 13/18670  | 0.0108806 | 0.0359475 | 0.021886 |
| BP | GO:0033145 | positive regulation of intracellular steroid hormone receptor signaling | 10/7778  | 13/18670  | 0.0108806 | 0.0359475 | 0.021886 |
| BP | GO:0034214 | protein hexamerization                                                  | 10/7778  | 13/18670  | 0.0108806 | 0.0359475 | 0.021886 |
| BP | GO:0046831 | regulation of RNA export from nucleus                                   | 10/7778  | 13/18670  | 0.0108806 | 0.0359475 | 0.021886 |
| BP | GO:0071696 | ectodermal placode development                                          | 10/7778  | 13/18670  | 0.0108806 | 0.0359475 | 0.021886 |
| BP | GO:0090239 | regulation of histone H4 acetylation                                    | 10/7778  | 13/18670  | 0.0108806 | 0.0359475 | 0.021886 |
| BP | GO:0098787 | mRNA cleavage involved in mRNA processing                               | 10/7778  | 13/18670  | 0.0108806 | 0.0359475 | 0.021886 |
| BP | GO:0099640 | axo-dendritic protein transport                                         | 10/7778  | 13/18670  | 0.0108806 | 0.0359475 | 0.021886 |
| BP | GO:1902894 | negative regulation of pri-miRNA transcription by RNA polymerase II     | 10/7778  | 13/18670  | 0.0108806 | 0.0359475 | 0.021886 |
| BP | GO:0006085 | acetyl-CoA biosynthetic process                                         | 15/7778  | 22/18670  | 0.0108869 | 0.0359475 | 0.021886 |
| BP | GO:0006379 | mRNA cleavage                                                           | 15/7778  | 22/18670  | 0.0108869 | 0.0359475 | 0.021886 |
| BP | GO:0008053 | mitochondrial fusion                                                    | 15/7778  | 22/18670  | 0.0108869 | 0.0359475 | 0.021886 |
| BP | GO:0050765 | negative regulation of phagocytosis                                     | 15/7778  | 22/18670  | 0.0108869 | 0.0359475 | 0.021886 |
| BP | GO:1903077 | negative regulation of protein localization to plasma membrane          | 15/7778  | 22/18670  | 0.0108869 | 0.0359475 | 0.021886 |
| BP | GO:1904666 | regulation of ubiquitin protein ligase activity                         | 15/7778  | 22/18670  | 0.0108869 | 0.0359475 | 0.021886 |
| BP | GO:0006487 | protein N-linked glycosylation                                          | 43/7778  | 78/18670  | 0.0111213 | 0.0367026 | 0.022346 |
| BP | GO:0030258 | lipid modification                                                      | 117/7778 | 238/18670 | 0.0111887 | 0.036906  | 0.02247  |
| BP | GO:0006486 | protein glycosylation                                                   | 126/7778 | 258/18670 | 0.0113138 | 0.0372806 | 0.022698 |
| BP | GO:0043413 | macromolecule glycosylation                                             | 126/7778 | 258/18670 | 0.0113138 | 0.0372806 | 0.022698 |
| BP | GO:0051147 | regulation of muscle cell differentiation                               | 91/7778  | 181/18670 | 0.0114807 | 0.0378112 | 0.023021 |
| BP | GO:0060349 | bone morphogenesis                                                      | 60/7778  | 114/18670 | 0.0115064 | 0.0378764 | 0.02306  |
| BP | GO:0070373 | negative regulation of ERK1 and ERK2 cascade                            | 41/7778  | 74/18670  | 0.0116459 | 0.0383159 | 0.023328 |
| BP | GO:0001919 | regulation of receptor recycling                                        | 16/7778  | 24/18670  | 0.0117752 | 0.038447  | 0.023408 |
| BP | GO:0003181 | atrioventricular valve morphogenesis                                    | 16/7778  | 24/18670  | 0.0117752 | 0.038447  | 0.023408 |
| BP | GO:0003272 | endocardial cushion formation                                           | 16/7778  | 24/18670  | 0.0117752 | 0.038447  | 0.023408 |
| BP | GO:0007530 | sex determination                                                       | 16/7778  | 24/18670  | 0.0117752 | 0.038447  | 0.023408 |
| BP | GO:0032528 | microvillus organization                                                | 16/7778  | 24/18670  | 0.0117752 | 0.038447  | 0.023408 |
| BP | GO:0036010 | protein localization to endosome                                        | 16/7778  | 24/18670  | 0.0117752 | 0.038447  | 0.023408 |
| BP | GO:0036315 | cellular response to sterol                                             | 16/7778  | 24/18670  | 0.0117752 | 0.038447  | 0.023408 |
| BP | GO:0044346 | fibroblast apoptotic process                                            | 16/7778  | 24/18670  | 0.0117752 | 0.038447  | 0.023408 |
| BP | GO:0046426 | negative regulation of receptor signaling pathway via JAK-STAT          | 16/7778  | 24/18670  | 0.0117752 | 0.038447  | 0.023408 |
| BP | GO:0046639 | negative regulation of alpha-beta T cell differentiation                | 16/7778  | 24/18670  | 0.0117752 | 0.038447  | 0.023408 |
| BP | GO:0050687 | negative regulation of defense response to virus                        | 16/7778  | 24/18670  | 0.0117752 | 0.038447  | 0.023408 |
| BP | GO:0051220 | cytoplasmic sequestering of protein                                     | 16/7778  | 24/18670  | 0.0117752 | 0.038447  | 0.023408 |
| BP | GO:1903020 | positive regulation of glycoprotein metabolic process                   | 16/7778  | 24/18670  | 0.0117752 | 0.038447  | 0.023408 |
| BP | GO:1903649 | regulation of cytoplasmic transport                                     | 16/7778  | 24/18670  | 0.0117752 | 0.038447  | 0.023408 |
| BP | GO:1904376 | negative regulation of protein localization to cell periphery           | 16/7778  | 24/18670  | 0.0117752 | 0.038447  | 0.023408 |
| BP | GO:0002832 | negative regulation of response to biotic stimulus                      | 51/7778  | 95/18670  | 0.0118038 | 0.0385207 | 0.023453 |
| BP | GO:0098693 | regulation of synaptic vesicle cycle                                    | 59/7778  | 112/18670 | 0.0118655 | 0.0387026 | 0.023563 |
| BP | GO:0035023 | regulation of Rho protein signal transduction                           | 72/7778  | 140/18670 | 0.0121148 | 0.0394958 | 0.024046 |
| BP | GO:0098840 | protein transport along microtubule                                     | 38/7778  | 68/18670  | 0.0124262 | 0.04047   | 0.02464  |
| BP | GO:0099118 | microtubule-based protein transport                                     | 38/7778  | 68/18670  | 0.0124262 | 0.04047   | 0.02464  |
| BP | GO:0001556 | oocyte maturation                                                       | 17/7778  | 26/18670  | 0.0125146 | 0.0406552 | 0.024752 |
| BP | GO:0003171 | atrioventricular valve development                                      | 17/7778  | 26/18670  | 0.0125146 | 0.0406552 | 0.024752 |
| BP | GO:0048169 | regulation of long-term neuronal synaptic plasticity                    | 17/7778  | 26/18670  | 0.0125146 | 0.0406552 | 0.024752 |
| BP | GO:0060740 | prostate gland epithelium morphogenesis                                 | 17/7778  | 26/18670  | 0.0125146 | 0.0406552 | 0.024752 |
| BP | GO:0070911 | global genome nucleotide-excision repair                                | 17/7778  | 26/18670  | 0.0125146 | 0.0406552 | 0.024752 |
| BP | GO:0040014 | regulation of multicellular organism growth                             | 37/7778  | 66/18670  | 0.0126806 | 0.0410962 | 0.025021 |
| BP | GO:0046626 | regulation of insulin receptor signaling pathway                        | 37/7778  | 66/18670  | 0.0126806 | 0.0410962 | 0.025021 |
| BP | GO:0099072 | regulation of postsynaptic membrane neurotransmitter receptor level     | 37/7778  | 66/18670  | 0.0126806 | 0.0410962 | 0.025021 |
| BP | GO:1904888 | cranial skeletal system development                                     | 37/7778  | 66/18670  | 0.0126806 | 0.0410962 | 0.025021 |
| BP | GO:0046165 | alcohol biosynthetic process                                            | 88/7778  | 175/18670 | 0.0126823 | 0.0410962 | 0.025021 |
| BP | GO:0016051 | carbohydrate biosynthetic process                                       | 103/7778 | 208/18670 | 0.0128903 | 0.0417492 | 0.025418 |
| BP | GO:0035773 | insulin secretion involved in cellular response to glucose stimulus     | 36/7778  | 64/18670  | 0.0129299 | 0.0418565 | 0.025484 |
| BP | GO:0006760 | folic acid-containing compound metabolic process                        | 18/7778  | 28/18670  | 0.0131199 | 0.0422591 | 0.025729 |
| BP | GO:0031440 | regulation of mRNA 3'-end processing                                    | 18/7778  | 28/18670  | 0.0131199 | 0.0422591 | 0.025729 |
| BP | GO:0035456 | response to interferon-beta                                             | 18/7778  | 28/18670  | 0.0131199 | 0.0422591 | 0.025729 |
| BP | GO:0051123 | RNA polymerase II preinitiation complex assembly                        | 18/7778  | 28/18670  | 0.0131199 | 0.0422591 | 0.025729 |
| BP | GO:0060512 | prostate gland morphogenesis                                            | 18/7778  | 28/18670  | 0.0131199 | 0.0422591 | 0.025729 |
| BP | GO:0061615 | glycolytic process through fructose-6-phosphate                         | 18/7778  | 28/18670  | 0.0131199 | 0.0422591 | 0.025729 |
| BP | GO:0061620 | glycolytic process through glucose-6-phosphate                          | 18/7778  | 28/18670  | 0.0131199 | 0.0422591 | 0.025729 |
| BP | GO:0070076 | histone lysine demethylation                                            | 18/7778  | 28/18670  | 0.0131199 | 0.0422591 | 0.025729 |
| BP | GO:0090344 | negative regulation of cell aging                                       | 18/7778  | 28/18670  | 0.0131199 | 0.0422591 | 0.025729 |
| BP | GO:2000108 | positive regulation of leukocyte apoptotic process                      | 18/7778  | 28/18670  | 0.0131199 | 0.0422591 | 0.025729 |
| BP | GO:0032387 | negative regulation of intracellular transport                          | 35/7778  | 62/18670  | 0.0131727 | 0.0423188 | 0.025765 |
| BP | GO:0001711 | endodermal cell fate commitment                                         | 11/7778  | 15/18670  | 0.0132632 | 0.0423188 | 0.025765 |
| BP | GO:0015936 | coenzyme A metabolic process                                            | 11/7778  | 15/18670  | 0.0132632 | 0.0423188 | 0.025765 |
| BP | GO:0032239 | regulation of nucleobase-containing compound transport                  | 11/7778  | 15/18670  | 0.0132632 | 0.0423188 | 0.025765 |
| BP | GO:0032486 | Rap protein signal transduction                                         | 11/7778  | 15/18670  | 0.0132632 | 0.0423188 | 0.025765 |
| BP | GO:0034134 | toll-like receptor 2 signaling pathway                                  | 11/7778  | 15/18670  | 0.0132632 | 0.0423188 | 0.025765 |
| BP | GO:0034616 | response to laminar fluid shear stress                                  | 11/7778  | 15/18670  | 0.0132632 | 0.0423188 | 0.025765 |
| BP | GO:0042762 | regulation of sulfur metabolic process                                  | 11/7778  | 15/18670  | 0.0132632 | 0.0423188 | 0.025765 |
| BP | GO:0043584 | nose development                                                        | 11/7778  | 15/18670  | 0.0132632 | 0.0423188 | 0.025765 |
| BP | GO:0045898 | regulation of RNA polymerase II transcription preinitiation complex a   | 11/7778  | 15/18670  | 0.0132632 | 0.0423188 | 0.025765 |
| BP | GO:0048569 | post-embryonic animal organ development                                 | 11/7778  | 15/18670  | 0.0132632 | 0.0423188 | 0.025765 |
| BP | GO:0060841 | venous blood vessel development                                         | 11/7778  | 15/18670  | 0.0132632 | 0.0423188 | 0.025765 |
| BP | GO:0070365 | hepatocyte differentiation                                              | 11/7778  | 15/18670  | 0.0132632 | 0.0423188 | 0.025765 |
| BP | GO:0072075 | metanephric mesenchyme development                                      | 11/7778  | 15/18670  | 0.0132632 | 0.0423188 | 0.025765 |
| BP | GO:1902187 | negative regulation of viral release from host cell                     | 11/7778  | 15/18670  | 0.0132632 | 0.0423188 | 0.025765 |
| BP | GO:1902188 | positive regulation of viral release from host cell                     | 11/7778  | 15/18670  | 0.0132632 | 0.0423188 | 0.025765 |
| BP | GO:1903729 | regulation of plasma membrane organization                              | 11/7778  | 15/18670  | 0.0132632 | 0.0423188 | 0.025765 |
| BP | GO:2001028 | positive regulation of endothelial cell chemotaxis                      | 11/7778  | 15/18670  | 0.0132632 | 0.0423188 | 0.025765 |
| BP | GO:2001185 | regulation of CD8-positive, alpha-beta T cell activation                | 11/7778  | 15/18670  | 0.0132632 | 0.0423188 | 0.025765 |
| BP | GO:0050920 | regulation of chemotaxis                                                | 107/7778 | 217/18670 | 0.0132745 | 0.0423339 | 0.025774 |
| BP | GO:0032273 | positive regulation of protein polymerization                           | 69/7778  | 134/18670 | 0.0133594 | 0.0425416 | 0.025901 |

|    |            |                                                                       |          |           |           |           |          |
|----|------------|-----------------------------------------------------------------------|----------|-----------|-----------|-----------|----------|
| BP | GO:0044409 | entry into host                                                       | 69/7778  | 134/18670 | 0.0133594 | 0.0425416 | 0.025901 |
| BP | GO:0048565 | digestive tract development                                           | 69/7778  | 134/18670 | 0.0133594 | 0.0425416 | 0.025901 |
| BP | GO:0043524 | negative regulation of neuron apoptotic process                       | 75/7778  | 147/18670 | 0.0134134 | 0.0426923 | 0.025993 |
| BP | GO:0003209 | cardiac atrium morphogenesis                                          | 19/7778  | 30/18670  | 0.0136055 | 0.0431119 | 0.026248 |
| BP | GO:0006517 | protein deglycosylation                                               | 19/7778  | 30/18670  | 0.0136055 | 0.0431119 | 0.026248 |
| BP | GO:0021696 | cerebellar cortex morphogenesis                                       | 19/7778  | 30/18670  | 0.0136055 | 0.0431119 | 0.026248 |
| BP | GO:0044818 | mitotic G2/M transition checkpoint                                    | 19/7778  | 30/18670  | 0.0136055 | 0.0431119 | 0.026248 |
| BP | GO:0045880 | positive regulation of smoothened signaling pathway                   | 19/7778  | 30/18670  | 0.0136055 | 0.0431119 | 0.026248 |
| BP | GO:0048147 | negative regulation of fibroblast proliferation                       | 19/7778  | 30/18670  | 0.0136055 | 0.0431119 | 0.026248 |
| BP | GO:0090200 | positive regulation of release of cytochrome c from mitochondria      | 19/7778  | 30/18670  | 0.0136055 | 0.0431119 | 0.026248 |
| BP | GO:0097421 | liver regeneration                                                    | 19/7778  | 30/18670  | 0.0136055 | 0.0431119 | 0.026248 |
| BP | GO:1904292 | regulation of ERAD pathway                                            | 19/7778  | 30/18670  | 0.0136055 | 0.0431119 | 0.026248 |
| BP | GO:0031663 | lipopolysaccharide-mediated signaling pathway                         | 33/7778  | 58/18670  | 0.0136314 | 0.0431515 | 0.026272 |
| BP | GO:0071385 | cellular response to glucocorticoid stimulus                          | 33/7778  | 58/18670  | 0.0136314 | 0.0431515 | 0.026272 |
| BP | GO:0030148 | sphingolipid biosynthetic process                                     | 54/7778  | 102/18670 | 0.0138239 | 0.0437355 | 0.026628 |
| BP | GO:0051568 | histone H3-K4 methylation                                             | 32/7778  | 56/18670  | 0.013843  | 0.0437355 | 0.026628 |
| BP | GO:0060688 | regulation of morphogenesis of a branching structure                  | 32/7778  | 56/18670  | 0.013843  | 0.0437355 | 0.026628 |
| BP | GO:1903202 | negative regulation of oxidative stress-induced cell death            | 32/7778  | 56/18670  | 0.013843  | 0.0437355 | 0.026628 |
| BP | GO:1903955 | positive regulation of protein targeting to mitochondrion             | 20/7778  | 32/18670  | 0.0139853 | 0.0441149 | 0.026875 |
| BP | GO:2000780 | negative regulation of double-strand break repair                     | 20/7778  | 32/18670  | 0.0139853 | 0.0441149 | 0.026875 |
| BP | GO:0048660 | regulation of smooth muscle cell proliferation                        | 85/7778  | 169/18670 | 0.0140141 | 0.0442109 | 0.026917 |
| BP | GO:0051353 | positive regulation of oxidoreductase activity                        | 31/7778  | 54/18670  | 0.0140395 | 0.0442694 | 0.026953 |
| BP | GO:0016447 | somatic recombination of immunoglobulin gene segments                 | 30/7778  | 52/18670  | 0.0142178 | 0.0448059 | 0.027279 |
| BP | GO:0030856 | regulation of epithelial cell differentiation                         | 79/7778  | 156/18670 | 0.0142345 | 0.0448059 | 0.027279 |
| BP | GO:0098657 | import into cell                                                      | 95/7778  | 191/18670 | 0.0142352 | 0.0448059 | 0.027279 |
| BP | GO:0007435 | salivary gland morphogenesis                                          | 21/7778  | 34/18670  | 0.0142722 | 0.0448059 | 0.027279 |
| BP | GO:0010092 | specification of animal organ identity                                | 21/7778  | 34/18670  | 0.0142722 | 0.0448059 | 0.027279 |
| BP | GO:0042558 | pteridine-containing compound metabolic process                       | 21/7778  | 34/18670  | 0.0142722 | 0.0448059 | 0.027279 |
| BP | GO:0060969 | negative regulation of gene silencing                                 | 21/7778  | 34/18670  | 0.0142722 | 0.0448059 | 0.027279 |
| BP | GO:0097009 | energy homeostasis                                                    | 21/7778  | 34/18670  | 0.0142722 | 0.0448059 | 0.027279 |
| BP | GO:1904030 | negative regulation of cyclin-dependent protein kinase activity       | 21/7778  | 34/18670  | 0.0142722 | 0.0448059 | 0.027279 |
| BP | GO:0008652 | cellular amino acid biosynthetic process                              | 44/7778  | 81/18670  | 0.0143219 | 0.0449399 | 0.027361 |
| BP | GO:0009112 | nucleobase metabolic process                                          | 22/7778  | 36/18670  | 0.0144777 | 0.0453625 | 0.027618 |
| BP | GO:0030224 | monocyte differentiation                                              | 22/7778  | 36/18670  | 0.0144777 | 0.0453625 | 0.027618 |
| BP | GO:1903131 | mononuclear cell differentiation                                      | 22/7778  | 36/18670  | 0.0144777 | 0.0453625 | 0.027618 |
| BP | GO:0035272 | exocrine system development                                           | 28/7778  | 48/18670  | 0.0145065 | 0.0454305 | 0.02766  |
| BP | GO:0048599 | oocyte development                                                    | 27/7778  | 46/18670  | 0.0146086 | 0.0456505 | 0.027794 |
| BP | GO:0051646 | mitochondrion localization                                            | 27/7778  | 46/18670  | 0.0146086 | 0.0456505 | 0.027794 |
| BP | GO:0097720 | calcineurin-mediated signaling                                        | 27/7778  | 46/18670  | 0.0146086 | 0.0456505 | 0.027794 |
| BP | GO:1904036 | negative regulation of epithelial cell apoptotic process              | 27/7778  | 46/18670  | 0.0146086 | 0.0456505 | 0.027794 |
| BP | GO:0001825 | blastocyst formation                                                  | 23/7778  | 38/18670  | 0.0146121 | 0.0456505 | 0.027794 |
| BP | GO:0042987 | amyloid precursor protein catabolic process                           | 26/7778  | 44/18670  | 0.0146762 | 0.0457742 | 0.027869 |
| BP | GO:0000183 | rDNA heterochromatin assembly                                         | 24/7778  | 40/18670  | 0.0146847 | 0.0457742 | 0.027869 |
| BP | GO:0002369 | T cell cytokine production                                            | 24/7778  | 40/18670  | 0.0146847 | 0.0457742 | 0.027869 |
| BP | GO:0072583 | clathrin-dependent endocytosis                                        | 24/7778  | 40/18670  | 0.0146847 | 0.0457742 | 0.027869 |
| BP | GO:0043473 | pigmentation                                                          | 52/7778  | 98/18670  | 0.0146872 | 0.0457742 | 0.027869 |
| BP | GO:0006284 | base-excision repair                                                  | 25/7778  | 42/18670  | 0.0147037 | 0.0457811 | 0.027873 |
| BP | GO:0017145 | stem cell division                                                    | 25/7778  | 42/18670  | 0.0147037 | 0.0457811 | 0.027873 |
| BP | GO:0002223 | stimulatory C-type lectin receptor signaling pathway                  | 59/7778  | 113/18670 | 0.0148942 | 0.0463295 | 0.028207 |
| BP | GO:0048640 | negative regulation of developmental growth                           | 59/7778  | 113/18670 | 0.0148942 | 0.0463295 | 0.028207 |
| BP | GO:0009205 | purine ribonucleoside triphosphate metabolic process                  | 42/7778  | 77/18670  | 0.0150998 | 0.0469464 | 0.028583 |
| BP | GO:0003184 | pulmonary valve morphogenesis                                         | 12/7778  | 17/18670  | 0.0152717 | 0.0472302 | 0.028755 |
| BP | GO:0003198 | epithelial to mesenchymal transition involved in endocardial cushion  | 12/7778  | 17/18670  | 0.0152717 | 0.0472302 | 0.028755 |
| BP | GO:0016246 | RNA interference                                                      | 12/7778  | 17/18670  | 0.0152717 | 0.0472302 | 0.028755 |
| BP | GO:0035855 | megakaryocyte development                                             | 12/7778  | 17/18670  | 0.0152717 | 0.0472302 | 0.028755 |
| BP | GO:0043923 | positive regulation by host of viral transcription                    | 12/7778  | 17/18670  | 0.0152717 | 0.0472302 | 0.028755 |
| BP | GO:0090185 | negative regulation of kidney development                             | 12/7778  | 17/18670  | 0.0152717 | 0.0472302 | 0.028755 |
| BP | GO:0099010 | modification of postsynaptic structure                                | 12/7778  | 17/18670  | 0.0152717 | 0.0472302 | 0.028755 |
| BP | GO:1904355 | positive regulation of telomere capping                               | 12/7778  | 17/18670  | 0.0152717 | 0.0472302 | 0.028755 |
| BP | GO:1904948 | midbrain dopaminergic neuron differentiation                          | 12/7778  | 17/18670  | 0.0152717 | 0.0472302 | 0.028755 |
| BP | GO:2000136 | regulation of cell proliferation involved in heart morphogenesis      | 12/7778  | 17/18670  | 0.0152717 | 0.0472302 | 0.028755 |
| BP | GO:2000811 | negative regulation of anoikis                                        | 12/7778  | 17/18670  | 0.0152717 | 0.0472302 | 0.028755 |
| BP | GO:0022618 | ribonucleoprotein complex assembly                                    | 112/7778 | 229/18670 | 0.0153645 | 0.0474943 | 0.028916 |
| BP | GO:0031623 | receptor internalization                                              | 58/7778  | 111/18670 | 0.0153758 | 0.0475064 | 0.028923 |
| BP | GO:0001707 | mesoderm formation                                                    | 41/7778  | 75/18670  | 0.0154966 | 0.0478566 | 0.029137 |
| BP | GO:0044728 | DNA methylation or demethylation                                      | 50/7778  | 94/18670  | 0.0155986 | 0.0481488 | 0.029315 |
| BP | GO:0002312 | B cell activation involved in immune response                         | 40/7778  | 73/18670  | 0.0158977 | 0.0490225 | 0.029848 |
| BP | GO:0060350 | endochondral bone morphogenesis                                       | 40/7778  | 73/18670  | 0.0158977 | 0.0490225 | 0.029848 |
| BP | GO:0000338 | protein deneddylation                                                 | 8/7778   | 10/18670  | 0.0162368 | 0.0494551 | 0.03011  |
| BP | GO:0007084 | mitotic nuclear envelope reassembly                                   | 8/7778   | 10/18670  | 0.0162368 | 0.0494551 | 0.03011  |
| BP | GO:0010603 | regulation of cytoplasmic mRNA processing body assembly               | 8/7778   | 10/18670  | 0.0162368 | 0.0494551 | 0.03011  |
| BP | GO:0010944 | negative regulation of transcription by competitive promoter binding  | 8/7778   | 10/18670  | 0.0162368 | 0.0494551 | 0.03011  |
| BP | GO:0032070 | regulation of deoxyribonuclease activity                              | 8/7778   | 10/18670  | 0.0162368 | 0.0494551 | 0.03011  |
| BP | GO:0035871 | protein K11-linked deubiquitination                                   | 8/7778   | 10/18670  | 0.0162368 | 0.0494551 | 0.03011  |
| BP | GO:0035999 | tetrahydrofolate interconversion                                      | 8/7778   | 10/18670  | 0.0162368 | 0.0494551 | 0.03011  |
| BP | GO:0036500 | ATF6-mediated unfolded protein response                               | 8/7778   | 10/18670  | 0.0162368 | 0.0494551 | 0.03011  |
| BP | GO:0043471 | regulation of cellular carbohydrate catabolic process                 | 8/7778   | 10/18670  | 0.0162368 | 0.0494551 | 0.03011  |
| BP | GO:0045876 | positive regulation of sister chromatid cohesion                      | 8/7778   | 10/18670  | 0.0162368 | 0.0494551 | 0.03011  |
| BP | GO:0051409 | response to nitrosative stress                                        | 8/7778   | 10/18670  | 0.0162368 | 0.0494551 | 0.03011  |
| BP | GO:0061299 | retina vasculature morphogenesis in camera-type eye                   | 8/7778   | 10/18670  | 0.0162368 | 0.0494551 | 0.03011  |
| BP | GO:0072124 | regulation of glomerular mesangial cell proliferation                 | 8/7778   | 10/18670  | 0.0162368 | 0.0494551 | 0.03011  |
| BP | GO:0072203 | cell proliferation involved in metanephros development                | 8/7778   | 10/18670  | 0.0162368 | 0.0494551 | 0.03011  |
| BP | GO:0072641 | type I interferon secretion                                           | 8/7778   | 10/18670  | 0.0162368 | 0.0494551 | 0.03011  |
| BP | GO:0090309 | positive regulation of DNA methylation-dependent heterochromatin as   | 8/7778   | 10/18670  | 0.0162368 | 0.0494551 | 0.03011  |
| BP | GO:0090557 | establishment of endothelial intestinal barrier                       | 8/7778   | 10/18670  | 0.0162368 | 0.0494551 | 0.03011  |
| BP | GO:0098734 | macromolecule depalmitoylation                                        | 8/7778   | 10/18670  | 0.0162368 | 0.0494551 | 0.03011  |
| BP | GO:0150011 | regulation of neuron projection arborization                          | 8/7778   | 10/18670  | 0.0162368 | 0.0494551 | 0.03011  |
| BP | GO:1900122 | positive regulation of receptor binding                               | 8/7778   | 10/18670  | 0.0162368 | 0.0494551 | 0.03011  |
| BP | GO:1901725 | regulation of histone deacetylase activity                            | 8/7778   | 10/18670  | 0.0162368 | 0.0494551 | 0.03011  |
| BP | GO:1901838 | positive regulation of transcription of nucleolar large rRNA by RNA p | 8/7778   | 10/18670  | 0.0162368 | 0.0494551 | 0.03011  |
| BP | GO:1903862 | positive regulation of oxidative phosphorylation                      | 8/7778   | 10/18670  | 0.0162368 | 0.0494551 | 0.03011  |
| BP | GO:2000271 | positive regulation of fibroblast apoptotic process                   | 8/7778   | 10/18670  | 0.0162368 | 0.0494551 | 0.03011  |

|    |            |                                                                |          |           |           |           |          |
|----|------------|----------------------------------------------------------------|----------|-----------|-----------|-----------|----------|
| BP | GO:2000628 | regulation of miRNA metabolic process                          | 8/7778   | 10/18670  | 0.0162368 | 0.0494551 | 0.03011  |
| BP | GO:2000644 | regulation of receptor catabolic process                       | 8/7778   | 10/18670  | 0.0162368 | 0.0494551 | 0.03011  |
| BP | GO:0051592 | response to calcium ion                                        | 75/7778  | 148/18670 | 0.0162666 | 0.0495224 | 0.030151 |
| BP | GO:0042273 | ribosomal large subunit biogenesis                             | 39/7778  | 71/18670  | 0.0163025 | 0.0496082 | 0.030203 |
| CC | GO:0030055 | cell-substrate junction                                        | 279/8049 | 412/19717 | 7.99E-29  | 6.09E-26  | 3.52E-26 |
| CC | GO:0005925 | focal adhesion                                                 | 274/8049 | 405/19717 | 3.17E-28  | 1.21E-25  | 6.98E-26 |
| CC | GO:0098687 | chromosomal region                                             | 231/8049 | 347/19717 | 1.51E-22  | 3.84E-20  | 2.22E-20 |
| CC | GO:0000151 | ubiquitin ligase complex                                       | 192/8049 | 282/19717 | 1.21E-20  | 2.02E-18  | 1.17E-18 |
| CC | GO:0016607 | nuclear speck                                                  | 253/8049 | 397/19717 | 1.32E-20  | 2.02E-18  | 1.17E-18 |
| CC | GO:0035770 | ribonucleoprotein granule                                      | 156/8049 | 223/19717 | 8.98E-19  | 1.14E-16  | 6.58E-17 |
| CC | GO:0005667 | transcription regulator complex                                | 257/8049 | 415/19717 | 1.72E-18  | 1.87E-16  | 1.08E-16 |
| CC | GO:0000790 | nuclear chromatin                                              | 236/8049 | 376/19717 | 4.14E-18  | 3.94E-16  | 2.28E-16 |
| CC | GO:0005819 | spindle                                                        | 219/8049 | 347/19717 | 2.67E-17  | 2.26E-15  | 1.31E-15 |
| CC | GO:0036464 | cytoplasmic ribonucleoprotein granule                          | 147/8049 | 212/19717 | 3.17E-17  | 2.42E-15  | 1.39E-15 |
| CC | GO:0061695 | transferase complex, transferring phosphorus-containing groups | 169/8049 | 259/19717 | 1.30E-15  | 8.97E-14  | 5.18E-14 |
| CC | GO:0005635 | nuclear envelope                                               | 273/8049 | 464/19717 | 6.00E-15  | 1.27E-13  | 7.34E-14 |
| CC | GO:0000775 | chromosome, centromeric region                                 | 132/8049 | 193/19717 | 7.16E-15  | 4.20E-13  | 2.42E-13 |
| CC | GO:0016605 | PML body                                                       | 78/8049  | 99/19717  | 1.25E-14  | 6.79E-13  | 3.92E-13 |
| CC | GO:0010008 | endosome membrane                                              | 277/8049 | 479/19717 | 2.41E-14  | 1.22E-12  | 7.06E-13 |
| CC | GO:0005769 | early endosome                                                 | 212/8049 | 350/19717 | 4.75E-14  | 2.26E-12  | 1.31E-12 |
| CC | GO:0005874 | microtubule                                                    | 243/8049 | 416/19717 | 2.12E-13  | 9.50E-12  | 5.48E-12 |
| CC | GO:0031252 | cell leading edge                                              | 236/8049 | 403/19717 | 3.25E-13  | 1.37E-11  | 7.94E-12 |
| CC | GO:0031965 | nuclear membrane                                               | 182/8049 | 296/19717 | 4.33E-13  | 1.74E-11  | 1.00E-11 |
| CC | GO:0031461 | cullin-RING ubiquitin ligase complex                           | 108/8049 | 158/19717 | 2.11E-12  | 8.03E-11  | 4.64E-11 |
| CC | GO:0005774 | vacuolar membrane                                              | 236/8049 | 412/19717 | 7.64E-12  | 2.77E-10  | 1.60E-10 |
| CC | GO:0010494 | cytoplasmic stress granule                                     | 54/8049  | 66/19717  | 9.62E-12  | 3.20E-10  | 1.85E-10 |
| CC | GO:0031984 | organelle subcompartment                                       | 220/8049 | 380/19717 | 9.67E-12  | 3.20E-10  | 1.85E-10 |
| CC | GO:0005741 | mitochondrial outer membrane                                   | 117/8049 | 178/19717 | 1.46E-11  | 4.46E-10  | 2.58E-10 |
| CC | GO:0005798 | Golgi-associated vesicle                                       | 117/8049 | 178/19717 | 1.46E-11  | 4.46E-10  | 2.58E-10 |
| CC | GO:0030496 | midbody                                                        | 114/8049 | 173/19717 | 2.09E-11  | 6.12E-10  | 3.54E-10 |
| CC | GO:0018995 | host cellular component                                        | 57/8049  | 73/19717  | 9.00E-11  | 2.45E-09  | 1.41E-09 |
| CC | GO:0043657 | host cell                                                      | 57/8049  | 73/19717  | 9.00E-11  | 2.45E-09  | 1.41E-09 |
| CC | GO:0031968 | organelle outer membrane                                       | 127/8049 | 201/19717 | 1.12E-10  | 2.94E-09  | 1.70E-09 |
| CC | GO:0019867 | outer membrane                                                 | 128/8049 | 203/19717 | 1.16E-10  | 2.94E-09  | 1.70E-09 |
| CC | GO:0017053 | transcription repressor complex                                | 59/8049  | 77/19717  | 1.66E-10  | 4.08E-09  | 2.35E-09 |
| CC | GO:0005765 | lysosomal membrane                                             | 203/8049 | 354/19717 | 1.93E-10  | 4.60E-09  | 2.65E-09 |
| CC | GO:0030027 | lamellipodium                                                  | 122/8049 | 193/19717 | 2.48E-10  | 5.73E-09  | 3.31E-09 |
| CC | GO:0098852 | lytic vacuole membrane                                         | 203/8049 | 355/19717 | 2.70E-10  | 6.05E-09  | 3.49E-09 |
| CC | GO:0000792 | heterochromatin                                                | 58/8049  | 76/19717  | 3.14E-10  | 6.83E-09  | 3.94E-09 |
| CC | GO:0000776 | kinetochore                                                    | 91/8049  | 135/19717 | 3.57E-10  | 7.56E-09  | 4.36E-09 |
| CC | GO:0000781 | chromosome, telomeric region                                   | 103/8049 | 158/19717 | 4.84E-10  | 9.98E-09  | 5.76E-09 |
| CC | GO:0098791 | Golgi apparatus subcompartment                                 | 204/8049 | 359/19717 | 5.12E-10  | 1.03E-08  | 5.93E-09 |
| CC | GO:0001650 | fibrillar center                                               | 89/8049  | 132/19717 | 5.45E-10  | 1.07E-08  | 6.15E-09 |
| CC | GO:0000784 | nuclear chromosome, telomeric region                           | 84/8049  | 123/19717 | 6.22E-10  | 1.19E-08  | 6.85E-09 |
| CC | GO:0030427 | site of polarized growth                                       | 112/8049 | 176/19717 | 7.47E-10  | 1.39E-08  | 8.02E-09 |
| CC | GO:0072686 | mitotic spindle                                                | 76/8049  | 109/19717 | 9.10E-10  | 1.65E-08  | 9.53E-09 |
| CC | GO:0030426 | growth cone                                                    | 109/8049 | 171/19717 | 1.09E-09  | 1.93E-08  | 1.11E-08 |
| CC | GO:0031248 | protein acetyltransferase complex                              | 68/8049  | 95/19717  | 1.17E-09  | 1.98E-08  | 1.14E-08 |
| CC | GO:1902493 | acetyltransferase complex                                      | 68/8049  | 95/19717  | 1.17E-09  | 1.98E-08  | 1.14E-08 |
| CC | GO:0005876 | spindle microtubule                                            | 47/8049  | 59/19717  | 1.21E-09  | 2.01E-08  | 1.16E-08 |
| CC | GO:0090575 | RNA polymerase II transcription regulator complex              | 106/8049 | 166/19717 | 1.59E-09  | 2.57E-08  | 1.49E-08 |
| CC | GO:0030135 | coated vesicle                                                 | 166/8049 | 289/19717 | 7.22E-09  | 1.15E-07  | 6.62E-08 |
| CC | GO:0031301 | integral component of organelle membrane                       | 195/8049 | 350/19717 | 1.04E-08  | 1.61E-07  | 9.32E-08 |
| CC | GO:0120111 | neuron projection cytoplasm                                    | 60/8049  | 84/19717  | 1.25E-08  | 1.91E-07  | 1.10E-07 |
| CC | GO:0031300 | intrinsic component of organelle membrane                      | 209/8049 | 381/19717 | 1.71E-08  | 2.56E-07  | 1.48E-07 |
| CC | GO:0000793 | condensed chromosome                                           | 132/8049 | 223/19717 | 2.07E-08  | 3.04E-07  | 1.76E-07 |
| CC | GO:0031519 | PcG protein complex                                            | 38/8049  | 47/19717  | 2.27E-08  | 3.26E-07  | 1.88E-07 |
| CC | GO:0000779 | condensed chromosome, centromeric region                       | 78/8049  | 118/19717 | 2.42E-08  | 3.41E-07  | 1.97E-07 |
| CC | GO:0000123 | histone acetyltransferase complex                              | 60/8049  | 85/19717  | 2.56E-08  | 3.55E-07  | 2.05E-07 |
| CC | GO:1902911 | protein kinase complex                                         | 73/8049  | 109/19717 | 2.94E-08  | 4.00E-07  | 2.31E-07 |
| CC | GO:0005938 | cell cortex                                                    | 173/8049 | 308/19717 | 3.20E-08  | 4.28E-07  | 2.47E-07 |
| CC | GO:0005802 | trans-Golgi network                                            | 137/8049 | 236/19717 | 6.02E-08  | 7.90E-07  | 4.56E-07 |
| CC | GO:0030117 | membrane coat                                                  | 65/8049  | 96/19717  | 8.83E-08  | 1.12E-06  | 6.47E-07 |
| CC | GO:0048475 | coated membrane                                                | 65/8049  | 96/19717  | 8.83E-08  | 1.12E-06  | 6.47E-07 |
| CC | GO:0005881 | cytoplasmic microtubule                                        | 50/8049  | 69/19717  | 9.67E-08  | 1.21E-06  | 6.97E-07 |
| CC | GO:1904115 | axon cytoplasm                                                 | 43/8049  | 57/19717  | 1.13E-07  | 1.39E-06  | 8.00E-07 |
| CC | GO:1904949 | ATPase complex                                                 | 56/8049  | 80/19717  | 1.18E-07  | 1.43E-06  | 8.26E-07 |
| CC | GO:0030176 | integral component of endoplasmic reticulum membrane           | 93/8049  | 150/19717 | 1.25E-07  | 1.48E-06  | 8.57E-07 |
| CC | GO:0001726 | ruffle                                                         | 104/8049 | 172/19717 | 1.45E-07  | 1.70E-06  | 9.79E-07 |
| CC | GO:0030660 | Golgi-associated vesicle membrane                              | 74/8049  | 114/19717 | 1.69E-07  | 1.92E-06  | 1.11E-06 |
| CC | GO:0035097 | histone methyltransferase complex                              | 59/8049  | 86/19717  | 1.69E-07  | 1.92E-06  | 1.11E-06 |
| CC | GO:0030133 | transport vesicle                                              | 210/8049 | 392/19717 | 1.83E-07  | 2.05E-06  | 1.18E-06 |
| CC | GO:1902554 | serine/threonine protein kinase complex                        | 60/8049  | 88/19717  | 1.87E-07  | 2.07E-06  | 1.20E-06 |
| CC | GO:0005657 | replication fork                                               | 50/8049  | 70/19717  | 2.04E-07  | 2.19E-06  | 1.27E-06 |
| CC | GO:0005770 | late endosome                                                  | 145/8049 | 256/19717 | 2.04E-07  | 2.19E-06  | 1.27E-06 |
| CC | GO:0005793 | endoplasmic reticulum-Golgi intermediate compartment           | 80/8049  | 126/19717 | 2.21E-07  | 2.34E-06  | 1.35E-06 |
| CC | GO:0034708 | methyltransferase complex                                      | 73/8049  | 113/19717 | 2.71E-07  | 2.83E-06  | 1.63E-06 |
| CC | GO:0031227 | intrinsic component of endoplasmic reticulum membrane          | 96/8049  | 158/19717 | 3.12E-07  | 3.21E-06  | 1.85E-06 |
| CC | GO:0042470 | melanosome                                                     | 69/8049  | 106/19717 | 3.72E-07  | 3.73E-06  | 2.15E-06 |
| CC | GO:0048770 | pigment granule                                                | 69/8049  | 106/19717 | 3.72E-07  | 3.73E-06  | 2.15E-06 |
| CC | GO:0034399 | nuclear periphery                                              | 82/8049  | 131/19717 | 3.80E-07  | 3.76E-06  | 2.17E-06 |
| CC | GO:0008287 | protein serine/threonine phosphatase complex                   | 35/8049  | 45/19717  | 4.83E-07  | 4.61E-06  | 2.66E-06 |
| CC | GO:1903293 | phosphatase complex                                            | 35/8049  | 45/19717  | 4.83E-07  | 4.61E-06  | 2.66E-06 |
| CC | GO:0000932 | P-body                                                         | 57/8049  | 84/19717  | 4.84E-07  | 4.61E-06  | 2.66E-06 |
| CC | GO:0000407 | phagophore assembly site                                       | 27/8049  | 32/19717  | 5.08E-07  | 4.78E-06  | 2.76E-06 |
| CC | GO:0000777 | condensed chromosome kinetochore                               | 68/8049  | 105/19717 | 6.00E-07  | 5.57E-06  | 3.22E-06 |
| CC | GO:0030662 | coated vesicle membrane                                        | 107/8049 | 182/19717 | 6.94E-07  | 6.34E-06  | 3.66E-06 |
| CC | GO:0150034 | distal axon                                                    | 157/8049 | 285/19717 | 6.99E-07  | 6.34E-06  | 3.66E-06 |
| CC | GO:0070603 | SWI/SNF superfamily-type complex                               | 52/8049  | 76/19717  | 1.03E-06  | 9.23E-06  | 5.33E-06 |
| CC | GO:0030120 | vesicle coat                                                   | 42/8049  | 58/19717  | 1.06E-06  | 9.38E-06  | 5.42E-06 |
| CC | GO:0101002 | ficolin-1-rich granule                                         | 77/8049  | 124/19717 | 1.34E-06  | 1.16E-05  | 6.72E-06 |
| CC | GO:1904813 | ficolin-1-rich granule lumen                                   | 77/8049  | 124/19717 | 1.34E-06  | 1.16E-05  | 6.72E-06 |

|    |            |                                                    |          |           |           |           |          |
|----|------------|----------------------------------------------------|----------|-----------|-----------|-----------|----------|
| CC | GO:0016234 | inclusion body                                     | 55/8049  | 82/19717  | 1.36E-06  | 1.16E-05  | 6.72E-06 |
| CC | GO:0000922 | spindle pole                                       | 97/8049  | 164/19717 | 1.55E-06  | 1.31E-05  | 7.59E-06 |
| CC | GO:0005720 | nuclear heterochromatin                            | 27/8049  | 33/19717  | 1.70E-06  | 1.42E-05  | 8.22E-06 |
| CC | GO:0030175 | filopodium                                         | 66/8049  | 104/19717 | 2.53E-06  | 2.10E-05  | 1.21E-05 |
| CC | GO:0005643 | nuclear pore                                       | 58/8049  | 89/19717  | 2.94E-06  | 2.38E-05  | 1.38E-05 |
| CC | GO:1905368 | peptidase complex                                  | 58/8049  | 89/19717  | 2.94E-06  | 2.38E-05  | 1.38E-05 |
| CC | GO:0055037 | recycling endosome                                 | 102/8049 | 176/19717 | 3.10E-06  | 2.49E-05  | 1.44E-05 |
| CC | GO:0031463 | Cul3-RING ubiquitin ligase complex                 | 29/8049  | 37/19717  | 3.60E-06  | 2.86E-05  | 1.65E-05 |
| CC | GO:0005681 | spliceosomal complex                               | 106/8049 | 185/19717 | 4.14E-06  | 3.25E-05  | 1.88E-05 |
| CC | GO:0090734 | site of DNA damage                                 | 49/8049  | 73/19717  | 4.91E-06  | 3.82E-05  | 2.21E-05 |
| CC | GO:1905369 | endopeptidase complex                              | 44/8049  | 64/19717  | 5.68E-06  | 4.37E-05  | 2.53E-05 |
| CC | GO:0030014 | CCR4-NOT complex                                   | 16/8049  | 17/19717  | 6.18E-06  | 4.71E-05  | 2.72E-05 |
| CC | GO:0000118 | histone deacetylase complex                        | 47/8049  | 70/19717  | 7.55E-06  | 5.70E-05  | 3.29E-05 |
| CC | GO:0000502 | proteasome complex                                 | 43/8049  | 63/19717  | 9.68E-06  | 7.23E-05  | 4.18E-05 |
| CC | GO:0031901 | early endosome membrane                            | 87/8049  | 149/19717 | 1.07E-05  | 7.91E-05  | 4.57E-05 |
| CC | GO:0000803 | sex chromosome                                     | 24/8049  | 30/19717  | 1.37E-05  | 0.0001006 | 5.81E-05 |
| CC | GO:0043025 | neuronal cell body                                 | 249/8049 | 497/19717 | 1.44E-05  | 0.0001044 | 6.03E-05 |
| CC | GO:0005743 | mitochondrial inner membrane                       | 238/8049 | 473/19717 | 1.51E-05  | 0.0001087 | 6.28E-05 |
| CC | GO:0098793 | presynapse                                         | 246/8049 | 491/19717 | 1.61E-05  | 0.0001148 | 6.63E-05 |
| CC | GO:0030137 | COPI-coated vesicle                                | 22/8049  | 27/19717  | 1.86E-05  | 0.0001314 | 7.59E-05 |
| CC | GO:0016363 | nuclear matrix                                     | 66/8049  | 109/19717 | 2.44E-05  | 0.0001709 | 9.87E-05 |
| CC | GO:0051233 | spindle midzone                                    | 26/8049  | 34/19717  | 2.56E-05  | 0.0001774 | 0.000102 |
| CC | GO:1990752 | microtubule end                                    | 23/8049  | 29/19717  | 2.71E-05  | 0.0001864 | 0.000108 |
| CC | GO:0030127 | COPII vesicle coat                                 | 14/8049  | 15/19717  | 3.29E-05  | 0.0002241 | 0.000129 |
| CC | GO:0032587 | ruffle membrane                                    | 58/8049  | 94/19717  | 3.43E-05  | 0.0002312 | 0.000134 |
| CC | GO:0099568 | cytoplasmic region                                 | 134/8049 | 251/19717 | 3.54E-05  | 0.0002367 | 0.000137 |
| CC | GO:0030880 | RNA polymerase complex                             | 67/8049  | 112/19717 | 3.69E-05  | 0.0002446 | 0.000141 |
| CC | GO:0035861 | site of double-strand break                        | 39/8049  | 58/19717  | 4.24E-05  | 0.0002786 | 0.000161 |
| CC | GO:0080008 | Cul4-RING E3 ubiquitin ligase complex              | 25/8049  | 33/19717  | 4.85E-05  | 0.0003158 | 0.000182 |
| CC | GO:0098589 | membrane region                                    | 169/8049 | 328/19717 | 5.09E-05  | 0.0003286 | 0.00019  |
| CC | GO:0019005 | SCF ubiquitin ligase complex                       | 42/8049  | 64/19717  | 5.25E-05  | 0.0003309 | 0.000191 |
| CC | GO:0005776 | autophagosome                                      | 57/8049  | 93/19717  | 5.25E-05  | 0.0003309 | 0.000191 |
| CC | GO:0030134 | COPII-coated ER to Golgi transport vesicle         | 57/8049  | 93/19717  | 5.25E-05  | 0.0003309 | 0.000191 |
| CC | GO:0005911 | cell-cell junction                                 | 209/8049 | 416/19717 | 5.47E-05  | 0.0003404 | 0.000197 |
| CC | GO:0055029 | nuclear DNA-directed RNA polymerase complex        | 64/8049  | 107/19717 | 5.49E-05  | 0.0003404 | 0.000197 |
| CC | GO:0000307 | cyclin-dependent protein kinase holoenzyme complex | 30/8049  | 42/19717  | 5.73E-05  | 0.0003523 | 0.000203 |
| CC | GO:0032993 | protein-DNA complex                                | 110/8049 | 202/19717 | 5.84E-05  | 0.0003561 | 0.000206 |
| CC | GO:0030663 | COPI-coated vesicle membrane                       | 17/8049  | 20/19717  | 6.40E-05  | 0.0003868 | 0.000223 |
| CC | GO:0000940 | condensed chromosome outer kinetochore             | 13/8049  | 14/19717  | 7.56E-05  | 0.0004537 | 0.000262 |
| CC | GO:0045121 | membrane raft                                      | 162/8049 | 315/19717 | 8.14E-05  | 0.0004808 | 0.000278 |
| CC | GO:0000428 | DNA-directed RNA polymerase complex                | 64/8049  | 108/19717 | 8.14E-05  | 0.0004808 | 0.000278 |
| CC | GO:0098562 | cytoplasmic side of membrane                       | 98/8049  | 178/19717 | 8.26E-05  | 0.0004842 | 0.00028  |
| CC | GO:0005795 | Golgi stack                                        | 84/8049  | 149/19717 | 8.67E-05  | 0.0005041 | 0.000291 |
| CC | GO:0098857 | membrane microdomain                               | 162/8049 | 316/19717 | 0.0001002 | 0.0005785 | 0.000334 |
| CC | GO:0098978 | glutamatergic synapse                              | 177/8049 | 349/19717 | 0.0001041 | 0.0005961 | 0.000344 |
| CC | GO:0055038 | recycling endosome membrane                        | 50/8049  | 81/19717  | 0.0001148 | 0.0006525 | 0.000377 |
| CC | GO:1902562 | H4 histone acetyltransferase complex               | 30/8049  | 43/19717  | 0.0001156 | 0.0006525 | 0.000377 |
| CC | GO:0071782 | endoplasmic reticulum tubular network              | 16/8049  | 19/19717  | 0.0001342 | 0.0007473 | 0.000431 |
| CC | GO:0014069 | postsynaptic density                               | 165/8049 | 324/19717 | 0.0001343 | 0.0007473 | 0.000431 |
| CC | GO:0030658 | transport vesicle membrane                         | 111/8049 | 208/19717 | 0.0001619 | 0.000888  | 0.000513 |
| CC | GO:0034045 | phagophore assembly site membrane                  | 14/8049  | 16/19717  | 0.0001635 | 0.000888  | 0.000513 |
| CC | GO:0035098 | ESC(E/Z) complex                                   | 14/8049  | 16/19717  | 0.0001635 | 0.000888  | 0.000513 |
| CC | GO:0005759 | mitochondrial matrix                               | 230/8049 | 469/19717 | 0.0001643 | 0.000888  | 0.000513 |
| CC | GO:0098984 | neuron to neuron synapse                           | 176/8049 | 350/19717 | 0.0001915 | 0.0010208 | 0.000589 |
| CC | GO:0032279 | asymmetric synapse                                 | 166/8049 | 328/19717 | 0.0001916 | 0.0010208 | 0.000589 |
| CC | GO:0016328 | lateral plasma membrane                            | 37/8049  | 57/19717  | 0.000203  | 0.0010745 | 0.00062  |
| CC | GO:0000242 | pericentriolar material                            | 17/8049  | 21/19717  | 0.0002073 | 0.0010893 | 0.000629 |
| CC | GO:0005875 | microtubule associated complex                     | 84/8049  | 152/19717 | 0.000217  | 0.0011324 | 0.000654 |
| CC | GO:0030667 | secretory granule membrane                         | 152/8049 | 298/19717 | 0.0002192 | 0.0011364 | 0.000656 |
| CC | GO:0070461 | SAGA-type complex                                  | 21/8049  | 28/19717  | 0.0002544 | 0.00131   | 0.000756 |
| CC | GO:0071013 | catalytic step 2 spliceosome                       | 52/8049  | 87/19717  | 0.000272  | 0.0013912 | 0.000803 |
| CC | GO:0045335 | phagocytic vesicle                                 | 74/8049  | 132/19717 | 0.00028   | 0.0014223 | 0.000821 |
| CC | GO:0098827 | endoplasmic reticulum subcompartment               | 18/8049  | 23/19717  | 0.0002906 | 0.0014663 | 0.000847 |
| CC | GO:0031256 | leading edge membrane                              | 92/8049  | 170/19717 | 0.0003006 | 0.0015061 | 0.00087  |
| CC | GO:0031253 | cell projection membrane                           | 164/8049 | 326/19717 | 0.0003024 | 0.0015061 | 0.00087  |
| CC | GO:0043596 | nuclear replication fork                           | 28/8049  | 41/19717  | 0.0003437 | 0.0017006 | 0.000982 |
| CC | GO:0030126 | COPI vesicle coat                                  | 13/8049  | 15/19717  | 0.000353  | 0.0017245 | 0.000996 |
| CC | GO:0030173 | integral component of Golgi membrane               | 38/8049  | 60/19717  | 0.000353  | 0.0017245 | 0.000996 |
| CC | GO:0012507 | ER to Golgi transport vesicle membrane             | 39/8049  | 62/19717  | 0.0003637 | 0.001765  | 0.001019 |
| CC | GO:0000152 | nuclear ubiquitin ligase complex                   | 29/8049  | 43/19717  | 0.0003757 | 0.0018118 | 0.001046 |
| CC | GO:0017101 | aminoacyl-tRNA synthetase multienzyme complex      | 11/8049  | 12/19717  | 0.0003926 | 0.0018816 | 0.001087 |
| CC | GO:0030670 | phagocytic vesicle membrane                        | 46/8049  | 76/19717  | 0.0004044 | 0.001926  | 0.001112 |
| CC | GO:0035371 | microtubule plus-end                               | 16/8049  | 20/19717  | 0.0004154 | 0.0019659 | 0.001135 |
| CC | GO:0099572 | postsynaptic specialization                        | 173/8049 | 348/19717 | 0.0004429 | 0.0020831 | 0.001203 |
| CC | GO:0032838 | plasma membrane bounded cell projection cytoplasm  | 109/8049 | 208/19717 | 0.0004563 | 0.0021332 | 0.001232 |
| CC | GO:0032154 | cleavage furrow                                    | 35/8049  | 55/19717  | 0.0005247 | 0.0024379 | 0.001408 |
| CC | GO:0005814 | centriole                                          | 76/8049  | 139/19717 | 0.0006467 | 0.0029865 | 0.001725 |
| CC | GO:0044309 | neuron spine                                       | 86/8049  | 161/19717 | 0.000802  | 0.0036622 | 0.002115 |
| CC | GO:0031983 | vesicle lumen                                      | 162/8049 | 327/19717 | 0.0008026 | 0.0036622 | 0.002115 |
| CC | GO:0060205 | cytoplasmic vesicle lumen                          | 161/8049 | 325/19717 | 0.0008339 | 0.0037825 | 0.002184 |
| CC | GO:0030139 | endocytic vesicle                                  | 151/8049 | 303/19717 | 0.0008611 | 0.0038827 | 0.002242 |
| CC | GO:0035577 | azurophil granule membrane                         | 36/8049  | 58/19717  | 0.0008702 | 0.003884  | 0.002243 |
| CC | GO:0000780 | condensed nuclear chromosome, centromeric region   | 19/8049  | 26/19717  | 0.0008716 | 0.003884  | 0.002243 |
| CC | GO:0034774 | secretory granule lumen                            | 159/8049 | 321/19717 | 0.0009003 | 0.0039885 | 0.002303 |
| CC | GO:0016592 | mediator complex                                   | 25/8049  | 37/19717  | 0.0009095 | 0.0040026 | 0.002311 |
| CC | GO:0032153 | cell division site                                 | 41/8049  | 68/19717  | 0.000914  | 0.0040026 | 0.002311 |
| CC | GO:0044295 | axonal growth cone                                 | 20/8049  | 28/19717  | 0.0010214 | 0.0044475 | 0.002568 |
| CC | GO:0042581 | specific granule                                   | 85/8049  | 160/19717 | 0.0010677 | 0.0046227 | 0.002669 |
| CC | GO:0044232 | organelle membrane contact site                    | 16/8049  | 21/19717  | 0.0010813 | 0.004655  | 0.002688 |
| CC | GO:0031091 | platelet alpha granule                             | 52/8049  | 91/19717  | 0.0011924 | 0.0051045 | 0.002947 |
| CC | GO:0005791 | rough endoplasmic reticulum                        | 49/8049  | 85/19717  | 0.0012566 | 0.0053494 | 0.003089 |
| CC | GO:0016591 | RNA polymerase II, holoenzyme                      | 48/8049  | 83/19717  | 0.0012762 | 0.0054027 | 0.00312  |

|    |            |                                                               |          |           |           |           |          |
|----|------------|---------------------------------------------------------------|----------|-----------|-----------|-----------|----------|
| CC | GO:0005811 | lipid droplet                                                 | 47/8049  | 81/19717  | 0.0012947 | 0.0054323 | 0.003137 |
| CC | GO:0032839 | dendrite cytoplasm                                            | 22/8049  | 32/19717  | 0.0012975 | 0.0054323 | 0.003137 |
| CC | GO:0005758 | mitochondrial intermembrane space                             | 46/8049  | 79/19717  | 0.0013118 | 0.0054622 | 0.003154 |
| CC | GO:0005871 | kinesin complex                                               | 34/8049  | 55/19717  | 0.0013295 | 0.0055058 | 0.003179 |
| CC | GO:0033116 | endoplasmic reticulum-Golgi intermediate compartment membrane | 42/8049  | 71/19717  | 0.0013363 | 0.0056098 | 0.003239 |
| CC | GO:0005905 | clathrin-coated pit                                           | 41/8049  | 69/19717  | 0.0013703 | 0.0056098 | 0.003239 |
| CC | GO:0031228 | intrinsic component of Golgi membrane                         | 39/8049  | 65/19717  | 0.0013767 | 0.0056098 | 0.003239 |
| CC | GO:0043197 | dendritic spine                                               | 84/8049  | 159/19717 | 0.0014142 | 0.0057321 | 0.00331  |
| CC | GO:0005736 | RNA polymerase I complex                                      | 11/8049  | 13/19717  | 0.0016018 | 0.0064239 | 0.003709 |
| CC | GO:0042405 | nuclear inclusion body                                        | 11/8049  | 13/19717  | 0.0016018 | 0.0064239 | 0.003709 |
| CC | GO:0005788 | endoplasmic reticulum lumen                                   | 152/8049 | 309/19717 | 0.0016524 | 0.0065923 | 0.003807 |
| CC | GO:0031902 | late endosome membrane                                        | 72/8049  | 134/19717 | 0.0016634 | 0.0066017 | 0.003812 |
| CC | GO:0031970 | organelle envelope lumen                                      | 50/8049  | 88/19717  | 0.0017374 | 0.0068596 | 0.003961 |
| CC | GO:0005942 | phosphatidylinositol 3-kinase complex                         | 19/8049  | 27/19717  | 0.0018169 | 0.0071366 | 0.004121 |
| CC | GO:0098573 | intrinsic component of mitochondrial membrane                 | 43/8049  | 74/19717  | 0.001965  | 0.0076609 | 0.004424 |
| CC | GO:0000164 | protein phosphatase type 1 complex                            | 9/8049   | 10/19717  | 0.0019873 | 0.0076609 | 0.004424 |
| CC | GO:0036513 | Derlin-1 retrotranslocation complex                           | 9/8049   | 10/19717  | 0.0019873 | 0.0076609 | 0.004424 |
| CC | GO:0005844 | polysome                                                      | 42/8049  | 72/19717  | 0.0019906 | 0.0076609 | 0.004424 |
| CC | GO:0009898 | cytoplasmic side of plasma membrane                           | 81/8049  | 154/19717 | 0.0020039 | 0.0076731 | 0.004431 |
| CC | GO:0000794 | condensed nuclear chromosome                                  | 55/8049  | 99/19717  | 0.0021165 | 0.0080639 | 0.004656 |
| CC | GO:0030140 | trans-Golgi network transport vesicle                         | 21/8049  | 31/19717  | 0.0022245 | 0.0084169 | 0.00486  |
| CC | GO:0031985 | Golgi cisterna                                                | 63/8049  | 116/19717 | 0.0022313 | 0.0084169 | 0.00486  |
| CC | GO:0000778 | condensed nuclear chromosome kinetochore                      | 12/8049  | 15/19717  | 0.0023664 | 0.0087112 | 0.00503  |
| CC | GO:0005671 | Ada2/Gcn5/Ada3 transcription activator complex                | 12/8049  | 15/19717  | 0.0023664 | 0.0087112 | 0.00503  |
| CC | GO:0016581 | NuRD complex                                                  | 12/8049  | 15/19717  | 0.0023664 | 0.0087112 | 0.00503  |
| CC | GO:0090545 | CHD-type complex                                              | 12/8049  | 15/19717  | 0.0023664 | 0.0087112 | 0.00503  |
| CC | GO:0098554 | cytoplasmic side of endoplasmic reticulum membrane            | 12/8049  | 15/19717  | 0.0023664 | 0.0087112 | 0.00503  |
| CC | GO:0101031 | chaperone complex                                             | 16/8049  | 22/19717  | 0.0024614 | 0.0090173 | 0.005207 |
| CC | GO:0032592 | integral component of mitochondrial membrane                  | 42/8049  | 73/19717  | 0.0028542 | 0.0104063 | 0.006009 |
| CC | GO:0098858 | actin-based cell projection                                   | 105/8049 | 208/19717 | 0.0029135 | 0.0105718 | 0.006104 |
| CC | GO:0009295 | nucleoid                                                      | 27/8049  | 43/19717  | 0.0029633 | 0.0106012 | 0.006121 |
| CC | GO:0016235 | aggresome                                                     | 27/8049  | 43/19717  | 0.0029633 | 0.0106012 | 0.006121 |
| CC | GO:0042645 | mitochondrial nucleoid                                        | 27/8049  | 43/19717  | 0.0029633 | 0.0106012 | 0.006121 |
| CC | GO:0019898 | extrinsic component of membrane                               | 144/8049 | 295/19717 | 0.0031109 | 0.0110564 | 0.006384 |
| CC | GO:0005666 | RNA polymerase III complex                                    | 13/8049  | 17/19717  | 0.0031196 | 0.0110564 | 0.006384 |
| CC | GO:0030867 | rough endoplasmic reticulum membrane                          | 18/8049  | 26/19717  | 0.0031894 | 0.0111997 | 0.006467 |
| CC | GO:0030894 | replisome                                                     | 18/8049  | 26/19717  | 0.0031894 | 0.0111997 | 0.006467 |
| CC | GO:0005684 | U2-type spliceosomal complex                                  | 50/8049  | 90/19717  | 0.0032914 | 0.0113672 | 0.006564 |
| CC | GO:0005845 | mRNA cap binding complex                                      | 10/8049  | 12/19717  | 0.0033565 | 0.0113672 | 0.006564 |
| CC | GO:0030877 | beta-catenin destruction complex                              | 10/8049  | 12/19717  | 0.0033565 | 0.0113672 | 0.006564 |
| CC | GO:0031464 | Cul4A-RING E3 ubiquitin ligase complex                        | 10/8049  | 12/19717  | 0.0033565 | 0.0113672 | 0.006564 |
| CC | GO:0042555 | MCM complex                                                   | 10/8049  | 12/19717  | 0.0033565 | 0.0113672 | 0.006564 |
| CC | GO:0044615 | nuclear pore nuclear basket                                   | 10/8049  | 12/19717  | 0.0033565 | 0.0113672 | 0.006564 |
| CC | GO:0097504 | Gemini of coiled bodies                                       | 10/8049  | 12/19717  | 0.0033565 | 0.0113672 | 0.006564 |
| CC | GO:1990909 | Wnt signalosome                                               | 10/8049  | 12/19717  | 0.0033565 | 0.0113672 | 0.006564 |
| CC | GO:0016514 | SWI/SNF complex                                               | 14/8049  | 19/19717  | 0.0038253 | 0.012841  | 0.007415 |
| CC | GO:0043034 | costamere                                                     | 14/8049  | 19/19717  | 0.0038253 | 0.012841  | 0.007415 |
| CC | GO:0030136 | clathrin-coated vesicle                                       | 95/8049  | 188/19717 | 0.0043011 | 0.0143749 | 0.0083   |
| CC | GO:0008180 | COP9 signalosome                                              | 23/8049  | 36/19717  | 0.0043491 | 0.0144717 | 0.008356 |
| CC | GO:0035579 | specific granule membrane                                     | 50/8049  | 91/19717  | 0.0044405 | 0.0147116 | 0.008495 |
| CC | GO:0042575 | DNA polymerase complex                                        | 15/8049  | 21/19717  | 0.0044648 | 0.0147279 | 0.008504 |
| CC | GO:0010369 | chromocenter                                                  | 11/8049  | 14/19717  | 0.004704  | 0.015318  | 0.008845 |
| CC | GO:0033276 | transcription factor TFC complex                              | 11/8049  | 14/19717  | 0.004704  | 0.015318  | 0.008845 |
| CC | GO:0034518 | RNA cap binding complex                                       | 11/8049  | 14/19717  | 0.004704  | 0.015318  | 0.008845 |
| CC | GO:0030118 | clathrin coat                                                 | 28/8049  | 46/19717  | 0.004743  | 0.0153795 | 0.008881 |
| CC | GO:0008021 | synaptic vesicle                                              | 96/8049  | 191/19717 | 0.00502   | 0.0162086 | 0.009359 |
| CC | GO:0030666 | endocytic vesicle membrane                                    | 85/8049  | 167/19717 | 0.0052034 | 0.01673   | 0.00966  |
| CC | GO:0042641 | actomyosin                                                    | 44/8049  | 79/19717  | 0.005281  | 0.0169081 | 0.009763 |
| CC | GO:0030057 | desmosome                                                     | 17/8049  | 25/19717  | 0.0055189 | 0.0175957 | 0.01016  |
| CC | GO:0032432 | actin filament bundle                                         | 42/8049  | 75/19717  | 0.0055716 | 0.0176897 | 0.010215 |
| CC | GO:0044291 | cell-cell contact zone                                        | 40/8049  | 71/19717  | 0.0058621 | 0.0184829 | 0.010673 |
| CC | GO:0097431 | mitotic spindle pole                                          | 18/8049  | 27/19717  | 0.0059344 | 0.0184829 | 0.010673 |
| CC | GO:0000153 | cytoplasmic ubiquitin ligase complex                          | 12/8049  | 16/19717  | 0.0059427 | 0.0184829 | 0.010673 |
| CC | GO:0005852 | eukaryotic translation initiation factor 3 complex            | 12/8049  | 16/19717  | 0.0059427 | 0.0184829 | 0.010673 |
| CC | GO:0070822 | Sin3-type complex                                             | 12/8049  | 16/19717  | 0.0059427 | 0.0184829 | 0.010673 |
| CC | GO:0001725 | stress fiber                                                  | 38/8049  | 67/19717  | 0.0061477 | 0.0189658 | 0.010951 |
| CC | GO:0097517 | contractile actin filament bundle                             | 38/8049  | 67/19717  | 0.0061477 | 0.0189658 | 0.010951 |
| CC | GO:0005766 | primary lysosome                                              | 79/8049  | 155/19717 | 0.0065811 | 0.0201398 | 0.011629 |
| CC | GO:0042582 | azurophil granule                                             | 79/8049  | 155/19717 | 0.0065811 | 0.0201398 | 0.011629 |
| CC | GO:0016323 | basolateral plasma membrane                                   | 107/8049 | 217/19717 | 0.0067243 | 0.0204806 | 0.011826 |
| CC | GO:0030863 | cortical cytoskeleton                                         | 61/8049  | 116/19717 | 0.0067462 | 0.0204806 | 0.011826 |
| CC | GO:0098685 | Schaffer collateral - CA1 synapse                             | 45/8049  | 82/19717  | 0.0069361 | 0.0205776 | 0.011882 |
| CC | GO:0000235 | astral microtubule                                            | 9/8049   | 11/19717  | 0.0069402 | 0.0205776 | 0.011882 |
| CC | GO:0005652 | nuclear lamina                                                | 9/8049   | 11/19717  | 0.0069402 | 0.0205776 | 0.011882 |
| CC | GO:0005818 | aster                                                         | 9/8049   | 11/19717  | 0.0069402 | 0.0205776 | 0.011882 |
| CC | GO:0034663 | endoplasmic reticulum chaperone complex                       | 9/8049   | 11/19717  | 0.0069402 | 0.0205776 | 0.011882 |
| CC | GO:1990907 | beta-catenin-TCF complex                                      | 9/8049   | 11/19717  | 0.0069402 | 0.0205776 | 0.011882 |
| CC | GO:0031201 | SNARE complex                                                 | 28/8049  | 47/19717  | 0.0072075 | 0.0212872 | 0.012292 |
| CC | GO:0030119 | AP-type membrane coat adaptor complex                         | 27/8049  | 45/19717  | 0.0072391 | 0.0212981 | 0.012298 |
| CC | GO:0005604 | basement membrane                                             | 51/8049  | 95/19717  | 0.0075191 | 0.0220369 | 0.012725 |
| CC | GO:0030684 | preribosome                                                   | 42/8049  | 76/19717  | 0.0075972 | 0.0221805 | 0.012808 |
| CC | GO:0005721 | pericentric heterochromatin                                   | 14/8049  | 20/19717  | 0.0079724 | 0.023187  | 0.013389 |
| CC | GO:0001741 | XY body                                                       | 10/8049  | 13/19717  | 0.0092054 | 0.0262716 | 0.01517  |
| CC | GO:0008250 | oligosaccharyltransferase complex                             | 10/8049  | 13/19717  | 0.0092054 | 0.0262716 | 0.01517  |
| CC | GO:0016580 | Sin3 complex                                                  | 10/8049  | 13/19717  | 0.0092054 | 0.0262716 | 0.01517  |
| CC | GO:0044233 | mitochondria-associated endoplasmic reticulum membrane        | 10/8049  | 13/19717  | 0.0092054 | 0.0262716 | 0.01517  |
| CC | GO:1990023 | mitotic spindle midzone                                       | 10/8049  | 13/19717  | 0.0092054 | 0.0262716 | 0.01517  |
| CC | GO:0043601 | nuclear replisome                                             | 16/8049  | 24/19717  | 0.0094019 | 0.0267324 | 0.015436 |
| CC | GO:0090543 | Flemming body                                                 | 18/8049  | 28/19717  | 0.0103229 | 0.0292419 | 0.016885 |
| CC | GO:0032580 | Golgi cisterna membrane                                       | 49/8049  | 92/19717  | 0.010502  | 0.0296389 | 0.017114 |
| CC | GO:0002102 | podosome                                                      | 19/8049  | 30/19717  | 0.0106278 | 0.0298832 | 0.017255 |
| CC | GO:0042788 | polysomal ribosome                                            | 20/8049  | 32/19717  | 0.0108462 | 0.0303853 | 0.017545 |

|    |            |                                                                       |          |           |           |           |          |
|----|------------|-----------------------------------------------------------------------|----------|-----------|-----------|-----------|----------|
| CC | GO:0099738 | cell cortex region                                                    | 25/8049  | 42/19717  | 0.0110079 | 0.0305134 | 0.017619 |
| CC | GO:0000421 | autophagosome membrane                                                | 22/8049  | 36/19717  | 0.0110693 | 0.0305134 | 0.017619 |
| CC | GO:0032040 | small-subunit processome                                              | 23/8049  | 38/19717  | 0.0110936 | 0.0305134 | 0.017619 |
| CC | GO:0031462 | Cul2-RING ubiquitin ligase complex                                    | 11/8049  | 15/19717  | 0.0111322 | 0.0305134 | 0.017619 |
| CC | GO:0033290 | eukaryotic 48S preinitiation complex                                  | 11/8049  | 15/19717  | 0.0111322 | 0.0305134 | 0.017619 |
| CC | GO:0035102 | PRC1 complex                                                          | 11/8049  | 15/19717  | 0.0111322 | 0.0305134 | 0.017619 |
| CC | GO:0070382 | exocytic vesicle                                                      | 101/8049 | 207/19717 | 0.0118978 | 0.0324952 | 0.018764 |
| CC | GO:0098798 | mitochondrial protein complex                                         | 124/8049 | 259/19717 | 0.0122598 | 0.0333641 | 0.019265 |
| CC | GO:0031092 | platelet alpha granule membrane                                       | 12/8049  | 17/19717  | 0.0127181 | 0.0344882 | 0.019914 |
| CC | GO:0005912 | adherens junction                                                     | 41/8049  | 76/19717  | 0.0139876 | 0.0371174 | 0.021433 |
| CC | GO:0031594 | neuromuscular junction                                                | 41/8049  | 76/19717  | 0.0139876 | 0.0371174 | 0.021433 |
| CC | GO:0000159 | protein phosphatase type 2A complex                                   | 13/8049  | 19/19717  | 0.0139908 | 0.0371174 | 0.021433 |
| CC | GO:0000805 | X chromosome                                                          | 8/8049   | 10/19717  | 0.014126  | 0.0371174 | 0.021433 |
| CC | GO:0031010 | ISWI-type complex                                                     | 8/8049   | 10/19717  | 0.014126  | 0.0371174 | 0.021433 |
| CC | GO:0031080 | nuclear pore outer ring                                               | 8/8049   | 10/19717  | 0.014126  | 0.0371174 | 0.021433 |
| CC | GO:0031414 | N-terminal protein acetyltransferase complex                          | 8/8049   | 10/19717  | 0.014126  | 0.0371174 | 0.021433 |
| CC | GO:0070938 | contractile ring                                                      | 8/8049   | 10/19717  | 0.014126  | 0.0371174 | 0.021433 |
| CC | GO:0072546 | ER membrane protein complex                                           | 8/8049   | 10/19717  | 0.014126  | 0.0371174 | 0.021433 |
| CC | GO:0070469 | respirosome                                                           | 52/8049  | 100/19717 | 0.0153129 | 0.0400978 | 0.023154 |
| CC | GO:0046930 | pore complex                                                          | 15/8049  | 23/19717  | 0.0157474 | 0.0410942 | 0.023729 |
| CC | GO:0031304 | intrinsic component of mitochondrial inner membrane                   | 26/8049  | 45/19717  | 0.0159364 | 0.0413045 | 0.02385  |
| CC | GO:0031305 | integral component of mitochondrial inner membrane                    | 26/8049  | 45/19717  | 0.0159364 | 0.0413045 | 0.02385  |
| CC | GO:0005801 | cis-Golgi network                                                     | 37/8049  | 68/19717  | 0.0160635 | 0.0414929 | 0.023959 |
| CC | GO:0044665 | MLL1/2 complex                                                        | 18/8049  | 29/19717  | 0.0169373 | 0.0434552 | 0.025092 |
| CC | GO:0071339 | MLL1 complex                                                          | 18/8049  | 29/19717  | 0.0169373 | 0.0434552 | 0.025092 |
| CC | GO:0030914 | STAGA complex                                                         | 9/8049   | 12/19717  | 0.0176915 | 0.0450867 | 0.026034 |
| CC | GO:0071564 | npBAF complex                                                         | 9/8049   | 12/19717  | 0.0176915 | 0.0450867 | 0.026034 |
| CC | GO:0022626 | cytosolic ribosome                                                    | 57/8049  | 112/19717 | 0.0195022 | 0.0495356 | 0.028603 |
| MF | GO:0019787 | ubiquitin-like protein transferase activity                           | 277/7791 | 407/17696 | 4.07E-23  | 4.80E-20  | 3.74E-20 |
| MF | GO:0045296 | cadherin binding                                                      | 331/7791 | 331/17696 | 1.13E-21  | 5.15E-19  | 4.00E-19 |
| MF | GO:0050839 | cell adhesion molecule binding                                        | 324/7791 | 499/17696 | 1.31E-21  | 5.15E-19  | 4.00E-19 |
| MF | GO:0044389 | ubiquitin-like protein ligase binding                                 | 217/7791 | 308/17696 | 2.98E-21  | 8.81E-19  | 6.85E-19 |
| MF | GO:0004842 | ubiquitin-protein transferase activity                                | 258/7791 | 382/17696 | 6.70E-21  | 1.58E-18  | 1.23E-18 |
| MF | GO:0031625 | ubiquitin protein ligase binding                                      | 205/7791 | 290/17696 | 2.01E-20  | 3.96E-18  | 3.08E-18 |
| MF | GO:0140297 | DNA-binding transcription factor binding                              | 225/7791 | 351/17696 | 1.73E-14  | 2.92E-12  | 2.27E-12 |
| MF | GO:0004674 | protein serine/threonine kinase activity                              | 265/7791 | 439/17696 | 2.48E-12  | 3.66E-10  | 2.85E-10 |
| MF | GO:0003713 | transcription coactivator activity                                    | 200/7791 | 319/17696 | 1.04E-11  | 1.37E-09  | 1.06E-09 |
| MF | GO:0061629 | RNA polymerase II-specific DNA-binding transcription factor binding   | 177/7791 | 277/17696 | 1.60E-11  | 1.89E-09  | 1.47E-09 |
| MF | GO:0003725 | double-stranded RNA binding                                           | 61/7791  | 75/17696  | 3.40E-11  | 3.65E-09  | 2.84E-09 |
| MF | GO:0061659 | ubiquitin-like protein ligase activity                                | 149/7791 | 230/17696 | 1.47E-10  | 1.44E-08  | 1.12E-08 |
| MF | GO:0032182 | ubiquitin-like protein binding                                        | 73/7791  | 96/17696  | 1.59E-10  | 1.44E-08  | 1.12E-08 |
| MF | GO:0003714 | transcription corepressor activity                                    | 153/7791 | 238/17696 | 1.95E-10  | 1.65E-08  | 1.28E-08 |
| MF | GO:0004386 | helicase activity                                                     | 109/7791 | 163/17696 | 2.97E-09  | 2.34E-07  | 1.82E-07 |
| MF | GO:0061630 | ubiquitin protein ligase activity                                     | 140/7791 | 221/17696 | 4.80E-09  | 3.54E-07  | 2.76E-07 |
| MF | GO:0042393 | histone binding                                                       | 127/7791 | 197/17696 | 5.14E-09  | 3.57E-07  | 2.78E-07 |
| MF | GO:0016887 | ATPase activity                                                       | 250/7791 | 434/17696 | 6.19E-09  | 4.06E-07  | 3.16E-07 |
| MF | GO:0019903 | protein phosphatase binding                                           | 95/7791  | 140/17696 | 9.75E-09  | 6.06E-07  | 4.72E-07 |
| MF | GO:0017016 | Ras GTPase binding                                                    | 246/7791 | 429/17696 | 1.43E-08  | 8.42E-07  | 6.55E-07 |
| MF | GO:0046332 | SMAD binding                                                          | 60/7791  | 80/17696  | 1.69E-08  | 9.49E-07  | 7.38E-07 |
| MF | GO:0031267 | small GTPase binding                                                  | 252/7791 | 443/17696 | 2.54E-08  | 1.37E-06  | 1.06E-06 |
| MF | GO:0002039 | p53 binding                                                           | 51/7791  | 66/17696  | 3.66E-08  | 1.88E-06  | 1.46E-06 |
| MF | GO:0019902 | phosphatase binding                                                   | 117/7791 | 185/17696 | 9.81E-08  | 4.83E-06  | 3.75E-06 |
| MF | GO:0032549 | ribonucleoside binding                                                | 218/7791 | 381/17696 | 1.18E-07  | 5.59E-06  | 4.35E-06 |
| MF | GO:0043130 | ubiquitin binding                                                     | 56/7791  | 76/17696  | 1.43E-07  | 6.51E-06  | 5.07E-06 |
| MF | GO:0003727 | single-stranded RNA binding                                           | 67/7791  | 95/17696  | 1.49E-07  | 6.54E-06  | 5.09E-06 |
| MF | GO:0019207 | kinase regulator activity                                             | 128/7791 | 207/17696 | 1.67E-07  | 7.03E-06  | 5.47E-06 |
| MF | GO:0005525 | GTP binding                                                           | 213/7791 | 374/17696 | 2.66E-07  | 1.05E-05  | 8.21E-06 |
| MF | GO:0032550 | purine ribonucleoside binding                                         | 215/7791 | 378/17696 | 2.68E-07  | 1.05E-05  | 8.21E-06 |
| MF | GO:0001882 | nucleoside binding                                                    | 219/7791 | 388/17696 | 4.60E-07  | 1.75E-05  | 1.36E-05 |
| MF | GO:0001883 | purine nucleoside binding                                             | 215/7791 | 381/17696 | 5.98E-07  | 2.21E-05  | 1.72E-05 |
| MF | GO:0003730 | mRNA 3'-UTR binding                                                   | 63/7791  | 91/17696  | 9.97E-07  | 3.57E-05  | 2.78E-05 |
| MF | GO:0008022 | protein C-terminus binding                                            | 115/7791 | 187/17696 | 1.03E-06  | 3.59E-05  | 2.79E-05 |
| MF | GO:0042826 | histone deacetylase binding                                           | 74/7791  | 111/17696 | 1.18E-06  | 3.99E-05  | 3.11E-05 |
| MF | GO:0043021 | ribonucleoprotein complex binding                                     | 86/7791  | 133/17696 | 1.22E-06  | 3.99E-05  | 3.11E-05 |
| MF | GO:0015631 | tubulin binding                                                       | 191/7791 | 336/17696 | 1.29E-06  | 4.11E-05  | 3.20E-05 |
| MF | GO:0019887 | protein kinase regulator activity                                     | 110/7791 | 180/17696 | 2.70E-06  | 8.38E-05  | 6.52E-05 |
| MF | GO:0001217 | DNA-binding transcription repressor activity                          | 142/7791 | 242/17696 | 2.84E-06  | 8.38E-05  | 6.52E-05 |
| MF | GO:0001227 | DNA-binding transcription repressor activity, RNA polymerase II-speci | 142/7791 | 242/17696 | 2.84E-06  | 8.38E-05  | 6.52E-05 |
| MF | GO:0048156 | tau protein binding                                                   | 35/7791  | 45/17696  | 4.03E-06  | 0.0001162 | 9.04E-05 |
| MF | GO:0003678 | DNA helicase activity                                                 | 56/7791  | 81/17696  | 4.22E-06  | 0.0001187 | 9.23E-05 |
| MF | GO:0140030 | modification-dependent protein binding                                | 90/7791  | 144/17696 | 5.80E-06  | 0.0001592 | 0.000124 |
| MF | GO:0070491 | repressing transcription factor binding                               | 50/7791  | 71/17696  | 6.00E-06  | 0.0001611 | 0.000125 |
| MF | GO:0035257 | nuclear hormone receptor binding                                      | 94/7791  | 152/17696 | 6.92E-06  | 0.0001817 | 0.000141 |
| MF | GO:0008094 | DNA-dependent ATPase activity                                         | 73/7791  | 113/17696 | 7.99E-06  | 0.0002035 | 0.000158 |
| MF | GO:0051087 | chaperone binding                                                     | 67/7791  | 102/17696 | 8.10E-06  | 0.0002035 | 0.000158 |
| MF | GO:0019001 | guanyl nucleotide binding                                             | 216/7791 | 394/17696 | 8.72E-06  | 0.0002102 | 0.000164 |
| MF | GO:0032561 | guanyl ribonucleotide binding                                         | 216/7791 | 394/17696 | 8.72E-06  | 0.0002102 | 0.000164 |
| MF | GO:0001228 | DNA-binding transcription activator activity, RNA polymerase II-speci | 238/7791 | 439/17696 | 9.06E-06  | 0.000214  | 0.000167 |
| MF | GO:0016791 | phosphatase activity                                                  | 154/7791 | 270/17696 | 1.03E-05  | 0.0002357 | 0.000183 |
| MF | GO:0003924 | GTPase activity                                                       | 181/7791 | 324/17696 | 1.04E-05  | 0.0002357 | 0.000183 |
| MF | GO:0001216 | DNA-binding transcription activator activity                          | 238/7791 | 440/17696 | 1.12E-05  | 0.0002495 | 0.000194 |
| MF | GO:0019003 | GDP binding                                                           | 51/7791  | 74/17696  | 1.29E-05  | 0.0002828 | 0.00022  |
| MF | GO:0019210 | kinase inhibitor activity                                             | 47/7791  | 67/17696  | 1.34E-05  | 0.0002886 | 0.000225 |
| MF | GO:0031491 | nucleosome binding                                                    | 57/7791  | 85/17696  | 1.49E-05  | 0.0003148 | 0.000245 |
| MF | GO:0003697 | single-stranded DNA binding                                           | 72/7791  | 113/17696 | 1.87E-05  | 0.0003868 | 0.000301 |
| MF | GO:0004721 | phosphoprotein phosphatase activity                                   | 108/7791 | 182/17696 | 2.15E-05  | 0.000437  | 0.00034  |
| MF | GO:0019894 | kinesin binding                                                       | 32/7791  | 42/17696  | 2.24E-05  | 0.0004492 | 0.00035  |
| MF | GO:0034212 | peptide N-acetyltransferase activity                                  | 51/7791  | 75/17696  | 2.32E-05  | 0.0004496 | 0.00035  |
| MF | GO:0034450 | ubiquitin-ubiquitin ligase activity                                   | 13/7791  | 13/17696  | 2.32E-05  | 0.0004496 | 0.00035  |
| MF | GO:0016538 | cyclin-dependent protein serine/threonine kinase regulator activity   | 36/7791  | 49/17696  | 2.76E-05  | 0.0005263 | 0.00041  |
| MF | GO:0017048 | Rho GTPase binding                                                    | 105/7791 | 177/17696 | 2.83E-05  | 0.0005297 | 0.000412 |
| MF | GO:0004860 | protein kinase inhibitor activity                                     | 44/7791  | 63/17696  | 3.01E-05  | 0.0005546 | 0.000432 |



|    |            |                                                                         |          |           |           |           |          |
|----|------------|-------------------------------------------------------------------------|----------|-----------|-----------|-----------|----------|
| MF | GO:0032183 | SUMO binding                                                            | 15/7791  | 16/17696  | 4.22E-05  | 0.0007675 | 0.000597 |
| MF | GO:0097718 | disordered domain specific binding                                      | 26/7791  | 33/17696  | 4.91E-05  | 0.0008793 | 0.000684 |
| MF | GO:0008017 | microtubule binding                                                     | 139/7791 | 246/17696 | 5.05E-05  | 0.0008796 | 0.000684 |
| MF | GO:0061980 | regulatory RNA binding                                                  | 32/7791  | 43/17696  | 5.06E-05  | 0.0008796 | 0.000684 |
| MF | GO:0061631 | ubiquitin conjugating enzyme activity                                   | 29/7791  | 38/17696  | 5.20E-05  | 0.0008906 | 0.000693 |
| MF | GO:0004402 | histone acetyltransferase activity                                      | 44/7791  | 64/17696  | 5.53E-05  | 0.0009324 | 0.000725 |
| MF | GO:0061733 | peptide-lysine-N-acetyltransferase activity                             | 45/7791  | 66/17696  | 6.27E-05  | 0.0010387 | 0.000808 |
| MF | GO:0000287 | magnesium ion binding                                                   | 122/7791 | 213/17696 | 6.33E-05  | 0.0010387 | 0.000808 |
| MF | GO:0061650 | ubiquitin-like protein conjugating enzyme activity                      | 30/7791  | 40/17696  | 6.82E-05  | 0.0011026 | 0.000858 |
| MF | GO:0035258 | steroid hormone receptor binding                                        | 59/7791  | 92/17696  | 7.86E-05  | 0.0012545 | 0.000976 |
| MF | GO:0051219 | phosphoprotein binding                                                  | 54/7791  | 83/17696  | 8.83E-05  | 0.0013904 | 0.001082 |
| MF | GO:0003688 | DNA replication origin binding                                          | 20/7791  | 24/17696  | 9.03E-05  | 0.0013988 | 0.001088 |
| MF | GO:0043539 | protein serine/threonine kinase activator activity                      | 28/7791  | 37/17696  | 9.12E-05  | 0.0013988 | 0.001088 |
| MF | GO:0003684 | damaged DNA binding                                                     | 44/7791  | 65/17696  | 9.83E-05  | 0.0014888 | 0.001158 |
| MF | GO:0031072 | heat shock protein binding                                              | 73/7791  | 119/17696 | 0.0001027 | 0.001536  | 0.001195 |
| MF | GO:0140097 | catalytic activity, acting on DNA                                       | 121/7791 | 213/17696 | 0.0001101 | 0.0016254 | 0.001265 |
| MF | GO:0070411 | I-SMAD binding                                                          | 11/7791  | 11/17696  | 0.00012   | 0.0017496 | 0.001361 |
| MF | GO:0016922 | nuclear receptor binding                                                | 68/7791  | 110/17696 | 0.0001254 | 0.0018062 | 0.001405 |
| MF | GO:0042578 | phosphoric ester hydrolase activity                                     | 196/7791 | 367/17696 | 0.0001655 | 0.0023553 | 0.001833 |
| MF | GO:0004712 | protein serine/threonine/tyrosine kinase activity                       | 31/7791  | 43/17696  | 0.0001795 | 0.0025238 | 0.001964 |
| MF | GO:0048487 | beta-tubulin binding                                                    | 28/7791  | 38/17696  | 0.0002009 | 0.0027909 | 0.002172 |
| MF | GO:0005123 | death receptor binding                                                  | 15/7791  | 17/17696  | 0.0002114 | 0.0029034 | 0.002259 |
| MF | GO:0060090 | molecular adaptor activity                                              | 140/7791 | 254/17696 | 0.0002259 | 0.0030663 | 0.002386 |
| MF | GO:0051082 | unfolded protein binding                                                | 78/7791  | 131/17696 | 0.0002433 | 0.0032656 | 0.002541 |
| MF | GO:0004879 | nuclear receptor activity                                               | 33/7791  | 47/17696  | 0.0002524 | 0.0033118 | 0.002577 |
| MF | GO:0098531 | ligand-activated transcription factor activity                          | 33/7791  | 47/17696  | 0.0002524 | 0.0033118 | 0.002577 |
| MF | GO:0004722 | protein serine/threonine phosphatase activity                           | 49/7791  | 76/17696  | 0.0002562 | 0.0033253 | 0.002587 |
| MF | GO:0001103 | RNA polymerase II repressing transcription factor binding               | 26/7791  | 35/17696  | 0.0002736 | 0.0035123 | 0.002733 |
| MF | GO:0008013 | beta-catenin binding                                                    | 52/7791  | 82/17696  | 0.0003093 | 0.0039275 | 0.003056 |
| MF | GO:0003779 | actin binding                                                           | 225/7791 | 431/17696 | 0.0003368 | 0.0042318 | 0.003293 |
| MF | GO:0030145 | manganese ion binding                                                   | 41/7791  | 62/17696  | 0.0003647 | 0.0045216 | 0.003518 |
| MF | GO:0047485 | protein N-terminus binding                                              | 66/7791  | 109/17696 | 0.0003675 | 0.0045216 | 0.003518 |
| MF | GO:0008080 | N-acetyltransferase activity                                            | 56/7791  | 90/17696  | 0.0003781 | 0.0046033 | 0.003582 |
| MF | GO:0004535 | poly(A)-specific ribonuclease activity                                  | 12/7791  | 13/17696  | 0.0004076 | 0.0049122 | 0.003822 |
| MF | GO:0043022 | ribosome binding                                                        | 38/7791  | 57/17696  | 0.0004653 | 0.0055502 | 0.004319 |
| MF | GO:0033613 | activating transcription factor binding                                 | 53/7791  | 85/17696  | 0.0004986 | 0.0058483 | 0.004551 |
| MF | GO:0035035 | histone acetyltransferase binding                                       | 22/7791  | 29/17696  | 0.0005002 | 0.0058483 | 0.004551 |
| MF | GO:0001085 | RNA polymerase II transcription factor binding                          | 40/7791  | 61/17696  | 0.0005563 | 0.0064415 | 0.005012 |
| MF | GO:0019789 | SUMO transferase activity                                               | 17/7791  | 21/17696  | 0.0006136 | 0.0070357 | 0.005475 |
| MF | GO:0003724 | RNA helicase activity                                                   | 49/7791  | 78/17696  | 0.0006265 | 0.0071146 | 0.005536 |
| MF | GO:0035198 | miRNA binding                                                           | 23/7791  | 31/17696  | 0.0006407 | 0.0071386 | 0.005555 |
| MF | GO:0140142 | nucleocytoplasmic carrier activity                                      | 23/7791  | 31/17696  | 0.0006407 | 0.0071386 | 0.005555 |
| MF | GO:0001046 | core promoter sequence-specific DNA binding                             | 31/7791  | 45/17696  | 0.000655  | 0.0072297 | 0.005626 |
| MF | GO:0030374 | nuclear receptor transcription coactivator activity                     | 43/7791  | 67/17696  | 0.000693  | 0.007578  | 0.005896 |
| MF | GO:0035091 | phosphatidylinositol binding                                            | 133/7791 | 245/17696 | 0.0007382 | 0.0079982 | 0.006223 |
| MF | GO:0070064 | proline-rich region binding                                             | 15/7791  | 18/17696  | 0.0007484 | 0.0080355 | 0.006253 |
| MF | GO:0008187 | poly-pyrimidine tract binding                                           | 24/7791  | 33/17696  | 0.0007927 | 0.0084341 | 0.006563 |
| MF | GO:0140098 | catalytic activity, acting on RNA                                       | 201/7791 | 386/17696 | 0.0008    | 0.0084359 | 0.006564 |
| MF | GO:0005161 | platelet-derived growth factor receptor binding                         | 13/7791  | 15/17696  | 0.0008553 | 0.0089393 | 0.006956 |
| MF | GO:0043425 | bHLH transcription factor binding                                       | 21/7791  | 28/17696  | 0.0008737 | 0.0090171 | 0.007016 |
| MF | GO:0019208 | phosphatase regulator activity                                          | 58/7791  | 96/17696  | 0.000878  | 0.0090171 | 0.007016 |
| MF | GO:0051427 | hormone receptor binding                                                | 103/7791 | 185/17696 | 0.0009019 | 0.0091826 | 0.007145 |
| MF | GO:0031593 | polyubiquitin modification-dependent protein binding                    | 34/7791  | 51/17696  | 0.0009163 | 0.0092495 | 0.007197 |
| MF | GO:0016407 | acetyltransferase activity                                              | 65/7791  | 110/17696 | 0.0010221 | 0.0102299 | 0.00796  |
| MF | GO:0050681 | androgen receptor binding                                               | 30/7791  | 44/17696  | 0.0010416 | 0.0103369 | 0.008043 |
| MF | GO:0005085 | guanyl-nucleotide exchange factor activity                              | 117/7791 | 214/17696 | 0.0010551 | 0.0103753 | 0.008073 |
| MF | GO:0008135 | translation factor activity, RNA binding                                | 52/7791  | 85/17696  | 0.001063  | 0.0103753 | 0.008073 |
| MF | GO:0070717 | poly-purine tract binding                                               | 22/7791  | 30/17696  | 0.0010956 | 0.0106061 | 0.008253 |
| MF | GO:0042162 | telomeric DNA binding                                                   | 26/7791  | 37/17696  | 0.0011209 | 0.010762  | 0.008374 |
| MF | GO:0017124 | SH3 domain binding                                                      | 75/7791  | 130/17696 | 0.0011489 | 0.010942  | 0.008514 |
| MF | GO:0048027 | mRNA 5'-UTR binding                                                     | 19/7791  | 25/17696  | 0.0011839 | 0.0111855 | 0.008704 |
| MF | GO:0097110 | scaffold protein binding                                                | 38/7791  | 59/17696  | 0.001265  | 0.0118571 | 0.009226 |
| MF | GO:0031489 | myosin V binding                                                        | 14/7791  | 17/17696  | 0.0014322 | 0.0131117 | 0.010202 |
| MF | GO:0051010 | microtubule plus-end binding                                            | 14/7791  | 17/17696  | 0.0014322 | 0.0131117 | 0.010202 |
| MF | GO:1990381 | ubiquitin-specific protease binding                                     | 14/7791  | 17/17696  | 0.0014322 | 0.0131117 | 0.010202 |
| MF | GO:0031490 | chromatin DNA binding                                                   | 69/7791  | 119/17696 | 0.0014782 | 0.0134292 | 0.010449 |
| MF | GO:0045182 | translation regulator activity                                          | 80/7791  | 141/17696 | 0.0015635 | 0.0140671 | 0.010946 |
| MF | GO:0000979 | RNA polymerase II core promoter sequence-specific DNA binding           | 24/7791  | 34/17696  | 0.0015723 | 0.0140671 | 0.010946 |
| MF | GO:0017166 | vinculin binding                                                        | 10/7791  | 11/17696  | 0.0018003 | 0.0159864 | 0.012439 |
| MF | GO:0033558 | protein deacetylase activity                                            | 21/7791  | 29/17696  | 0.0018541 | 0.0163413 | 0.012715 |
| MF | GO:0005178 | integrin binding                                                        | 75/7791  | 132/17696 | 0.0020426 | 0.0178691 | 0.013904 |
| MF | GO:0070577 | lysine-acetylated histone binding                                       | 15/7791  | 19/17696  | 0.002102  | 0.0181205 | 0.0141   |
| MF | GO:0140033 | acetylation-dependent protein binding                                   | 15/7791  | 19/17696  | 0.002102  | 0.0181205 | 0.0141   |
| MF | GO:0060589 | nucleoside-triphosphatase regulator activity                            | 178/7791 | 344/17696 | 0.0022083 | 0.0188985 | 0.014705 |
| MF | GO:0060590 | ATPase regulator activity                                               | 27/7791  | 40/17696  | 0.0023156 | 0.0195658 | 0.015224 |
| MF | GO:0005160 | transforming growth factor beta receptor binding                        | 33/7791  | 51/17696  | 0.0023194 | 0.0195658 | 0.015224 |
| MF | GO:0001102 | RNA polymerase II activating transcription factor binding               | 34/7791  | 53/17696  | 0.0024793 | 0.0207663 | 0.016158 |
| MF | GO:0030544 | Hsp70 protein binding                                                   | 28/7791  | 42/17696  | 0.0025601 | 0.0208951 | 0.016259 |
| MF | GO:0004709 | MAP kinase kinase kinase activity                                       | 19/7791  | 26/17696  | 0.0025831 | 0.0208951 | 0.016259 |
| MF | GO:0017075 | syntaxin-1 binding                                                      | 19/7791  | 26/17696  | 0.0025831 | 0.0208951 | 0.016259 |
| MF | GO:0051019 | mitogen-activated protein kinase binding                                | 19/7791  | 26/17696  | 0.0025831 | 0.0208951 | 0.016259 |
| MF | GO:0051787 | misfolded protein binding                                               | 19/7791  | 26/17696  | 0.0025831 | 0.0208951 | 0.016259 |
| MF | GO:0005521 | lamin binding                                                           | 13/7791  | 16/17696  | 0.0027121 | 0.0214963 | 0.016726 |
| MF | GO:0015095 | magnesium ion transmembrane transporter activity                        | 13/7791  | 16/17696  | 0.0027121 | 0.0214963 | 0.016726 |
| MF | GO:0035259 | glucocorticoid receptor binding                                         | 13/7791  | 16/17696  | 0.0027121 | 0.0214963 | 0.016726 |
| MF | GO:0050750 | low-density lipoprotein particle receptor binding                       | 16/7791  | 21/17696  | 0.0028316 | 0.022939  | 0.017347 |
| MF | GO:0004407 | histone deacetylase activity                                            | 20/7791  | 28/17696  | 0.0031029 | 0.024268  | 0.018883 |
| MF | GO:0017017 | MAP kinase tyrosine/serine/threonine phosphatase activity               | 11/7791  | 13/17696  | 0.0033436 | 0.0259095 | 0.02016  |
| MF | GO:0004725 | protein tyrosine phosphatase activity                                   | 58/7791  | 100/17696 | 0.0033566 | 0.0259095 | 0.02016  |
| MF | GO:0016747 | transferase activity, transferring acyl groups other than amino-acyl gr | 123/7791 | 232/17696 | 0.0034677 | 0.0265933 | 0.020693 |
| MF | GO:0048365 | Rac GTPase binding                                                      | 42/7791  | 69/17696  | 0.0035454 | 0.0270134 | 0.021019 |
| MF | GO:0008266 | poly(U) RNA binding                                                     | 21/7791  | 30/17696  | 0.003624  | 0.0274353 | 0.021348 |

|    |            |                                                             |          |           |           |           |          |
|----|------------|-------------------------------------------------------------|----------|-----------|-----------|-----------|----------|
| MF | GO:0004576 | oligosaccharyl transferase activity                         | 9/7791   | 10/17696  | 0.0037444 | 0.0279885 | 0.021778 |
| MF | GO:0030957 | Tat protein binding                                         | 9/7791   | 10/17696  | 0.0037444 | 0.0279885 | 0.021778 |
| MF | GO:0019905 | syntaxin binding                                            | 45/7791  | 75/17696  | 0.0038397 | 0.0285203 | 0.022192 |
| MF | GO:0019199 | transmembrane receptor protein kinase activity              | 47/7791  | 79/17696  | 0.0040051 | 0.0295628 | 0.023003 |
| MF | GO:0043621 | protein self-association                                    | 35/7791  | 56/17696  | 0.0040737 | 0.0297365 | 0.023138 |
| MF | GO:0004527 | exonuclease activity                                        | 48/7791  | 81/17696  | 0.004079  | 0.0297365 | 0.023138 |
| MF | GO:0016417 | S-acyltransferase activity                                  | 22/7791  | 32/17696  | 0.0041389 | 0.0298048 | 0.023191 |
| MF | GO:0051721 | protein phosphatase 2A binding                              | 22/7791  | 32/17696  | 0.0041389 | 0.0298048 | 0.023191 |
| MF | GO:0016667 | oxidoreductase activity, acting on a sulfur group of donors | 36/7791  | 58/17696  | 0.0042534 | 0.0304209 | 0.023671 |
| MF | GO:0001221 | transcription cofactor binding                              | 28/7791  | 43/17696  | 0.0042759 | 0.0304209 | 0.023671 |
| MF | GO:0008139 | nuclear localization sequence binding                       | 18/7791  | 25/17696  | 0.0043649 | 0.030868  | 0.024019 |
| MF | GO:0016779 | nucleotidyltransferase activity                             | 76/7791  | 137/17696 | 0.0044918 | 0.031576  | 0.02457  |
| MF | GO:0043138 | 3'-5' DNA helicase activity                                 | 15/7791  | 20/17696  | 0.004983  | 0.0342525 | 0.026652 |
| MF | GO:0030674 | protein-macromolecule adaptor activity                      | 110/7791 | 207/17696 | 0.0049873 | 0.0342525 | 0.026652 |
| MF | GO:0001056 | RNA polymerase III activity                                 | 12/7791  | 15/17696  | 0.0050755 | 0.0342525 | 0.026652 |
| MF | GO:0003841 | 1-acylglycerol-3-phosphate O-acyltransferase activity       | 12/7791  | 15/17696  | 0.0050755 | 0.0342525 | 0.026652 |
| MF | GO:0005024 | transforming growth factor beta-activated receptor activity | 12/7791  | 15/17696  | 0.0050755 | 0.0342525 | 0.026652 |
| MF | GO:0033549 | MAP kinase phosphatase activity                             | 12/7791  | 15/17696  | 0.0050755 | 0.0342525 | 0.026652 |
| MF | GO:0042171 | lysophosphatidic acid acyltransferase activity              | 12/7791  | 15/17696  | 0.0050755 | 0.0342525 | 0.026652 |
| MF | GO:0003743 | translation initiation factor activity                      | 32/7791  | 51/17696  | 0.0054247 | 0.0364007 | 0.028324 |
| MF | GO:0051117 | ATPase binding                                              | 47/7791  | 80/17696  | 0.0056068 | 0.0374102 | 0.029109 |
| MF | GO:0046966 | thyroid hormone receptor binding                            | 20/7791  | 29/17696  | 0.0058778 | 0.0389627 | 0.030317 |
| MF | GO:0002020 | protease binding                                            | 71/7791  | 128/17696 | 0.0059054 | 0.0389627 | 0.030317 |
| MF | GO:0000149 | SNARE binding                                               | 62/7791  | 110/17696 | 0.0060679 | 0.0398121 | 0.030978 |
| MF | GO:0005158 | insulin receptor binding                                    | 16/7791  | 22/17696  | 0.0061444 | 0.039871  | 0.031024 |
| MF | GO:0050321 | tau-protein kinase activity                                 | 16/7791  | 22/17696  | 0.0061444 | 0.039871  | 0.031024 |
| MF | GO:0000340 | RNA 7-methylguanosine cap binding                           | 10/7791  | 12/17696  | 0.0065054 | 0.0415293 | 0.032314 |
| MF | GO:0001054 | RNA polymerase I activity                                   | 10/7791  | 12/17696  | 0.0065054 | 0.0415293 | 0.032314 |
| MF | GO:0031994 | insulin-like growth factor I binding                        | 10/7791  | 12/17696  | 0.0065054 | 0.0415293 | 0.032314 |
| MF | GO:0042813 | Wnt-activated receptor activity                             | 13/7791  | 17/17696  | 0.0068716 | 0.0433979 | 0.033768 |
| MF | GO:0070628 | proteasome binding                                          | 13/7791  | 17/17696  | 0.0068716 | 0.0433979 | 0.033768 |
| MF | GO:0005048 | signal sequence binding                                     | 29/7791  | 46/17696  | 0.0072328 | 0.0451952 | 0.035167 |
| MF | GO:0032813 | tumor necrosis factor receptor superfamily binding          | 29/7791  | 46/17696  | 0.0072328 | 0.0451952 | 0.035167 |
| MF | GO:0008143 | poly(A) binding                                             | 17/7791  | 24/17696  | 0.007281  | 0.0452572 | 0.035215 |
| MF | GO:1990841 | promoter-specific chromatin binding                         | 30/7791  | 48/17696  | 0.0075818 | 0.0468804 | 0.036478 |
| MF | GO:0051018 | protein kinase A binding                                    | 31/7791  | 50/17696  | 0.0079069 | 0.0486355 | 0.037844 |

BP, biological process; CC, cellular component; MF, molecular function.

**Table S4. KEGG terms enriched among the miRNA targeted genes.**

| ID       | Description                            | Gene     | Ratio    | P-value  | P-adjust | qvalue                | Gene ID | Count |
|----------|----------------------------------------|----------|----------|----------|----------|-----------------------|---------|-------|
| hsa04218 | Cellular senescence                    | 121/3698 | 2.82E-16 | 9.12E-14 | 5.14E-14 | 1869/1026/10114/121   |         |       |
| hsa05205 | Proteoglycans in cancer                | 149/3698 | 2.49E-15 | 4.02E-13 | 2.26E-13 | 27250/1026/7422/149   |         |       |
| hsa04115 | p53 signaling pathway                  | 64/3698  | 6.89E-14 | 6.66E-12 | 3.75E-12 | 1026/5268/355/27.64   |         |       |
| hsa04120 | Ubiquitin mediated proteolysis         | 107/3698 | 9.10E-14 | 6.66E-12 | 3.75E-12 | 83737/331/672/99.107  |         |       |
| hsa04110 | Cell cycle                             | 97/3698  | 1.03E-13 | 6.66E-12 | 3.75E-12 | 1869/1026/1021/1.97   |         |       |
| hsa05211 | Renal cell carcinoma                   | 60/3698  | 9.53E-13 | 4.74E-11 | 2.67E-11 | 1026/7422/7040/2.60   |         |       |
| hsa05223 | Non-small cell lung cancer             | 62/3698  | 1.03E-12 | 4.74E-11 | 2.67E-11 | 1869/1026/1021/5.62   |         |       |
| hsa04140 | Autophagy - animal                     | 102/3698 | 5.93E-12 | 2.40E-10 | 1.35E-10 | 596/5728/207/208.102  |         |       |
| hsa05210 | Colorectal cancer                      | 70/3698  | 9.46E-12 | 3.10E-10 | 1.75E-10 | 1026/596/7048/70.70   |         |       |
| hsa04068 | FoxO signaling pathway                 | 98/3698  | 9.58E-12 | 3.10E-10 | 1.75E-10 | 1026/23678/1005.98    |         |       |
| hsa04668 | TNF signaling pathway                  | 86/3698  | 1.64E-11 | 4.77E-10 | 2.69E-10 | 355/83737/2353/1.86   |         |       |
| hsa04390 | Hippo signaling pathway                | 113/3698 | 1.77E-11 | 4.77E-10 | 2.69E-10 | 659/7048/7159/70.113  |         |       |
| hsa05215 | Prostate cancer                        | 76/3698  | 4.36E-11 | 1.08E-09 | 6.11E-10 | 1869/1026/1027/5.76   |         |       |
| hsa05161 | Hepatitis B                            | 115/3698 | 5.01E-11 | 1.16E-09 | 6.52E-10 | 1869/1026/355/31.115  |         |       |
| hsa05168 | Herpes simplex virus 1 infection       | 298/3698 | 5.99E-11 | 1.25E-09 | 7.05E-10 | 355/317/596/1616.298  |         |       |
| hsa05132 | Salmonella infection                   | 162/3698 | 6.19E-11 | 1.25E-09 | 7.05E-10 | 596/581/2353/60/7.162 |         |       |
| hsa05167 | Kaposi sarcoma-associated herpesvii    | 132/3698 | 1.21E-10 | 2.22E-09 | 1.25E-09 | 1869/1026/7422/3.132  |         |       |
| hsa05212 | Pancreatic cancer                      | 62/3698  | 1.24E-10 | 2.22E-09 | 1.25E-09 | 1869/1026/7422/1.62   |         |       |
| hsa05220 | Chronic myeloid leukemia               | 60/3698  | 2.93E-09 | 4.97E-08 | 2.80E-08 | 1869/1026/1021/1.60   |         |       |
| hsa04141 | Protein processing in endoplasmic re   | 116/3698 | 3.50E-09 | 5.66E-08 | 3.19E-08 | 596/581/267/821/1.116 |         |       |
| hsa05131 | Shigellosis                            | 155/3698 | 5.15E-09 | 7.91E-08 | 4.46E-08 | 596/581/60/71/207.155 |         |       |
| hsa01522 | Endocrine resistance                   | 73/3698  | 6.04E-09 | 8.86E-08 | 5.00E-08 | 1869/1026/1027/5.73   |         |       |
| hsa05213 | Endometrial cancer                     | 48/3698  | 6.43E-09 | 9.03E-08 | 5.09E-08 | 1026/5728/595/58.48   |         |       |
| hsa04010 | MAPK signaling pathway                 | 182/3698 | 1.16E-08 | 1.53E-07 | 8.62E-08 | 3815/7422/355/70.182  |         |       |
| hsa05225 | Hepatocellular carcinoma               | 113/3698 | 1.18E-08 | 1.53E-07 | 8.62E-08 | 1869/1026/1021/7.113  |         |       |
| hsa04510 | Focal adhesion                         | 131/3698 | 1.69E-08 | 2.09E-07 | 1.18E-07 | 7422/596/5728/59.131  |         |       |
| hsa05163 | Human cytomegalovirus infection        | 144/3698 | 1.95E-08 | 2.34E-07 | 1.32E-07 | 1869/1026/7422/3.144  |         |       |
| hsa04933 | AGE-RAGE signaling pathway in diat     | 73/3698  | 2.61E-08 | 2.95E-07 | 1.67E-07 | 7422/1027/596/70.73   |         |       |
| hsa05169 | Epstein-Barr virus infection           | 131/3698 | 2.65E-08 | 2.95E-07 | 1.67E-07 | 1869/1026/355/31.131  |         |       |
| hsa04350 | TGF-beta signaling pathway             | 69/3698  | 4.35E-08 | 4.69E-07 | 2.64E-07 | 659/7048/7040/70.69   |         |       |
| hsa04520 | Adherens junction                      | 55/3698  | 4.54E-08 | 4.73E-07 | 2.67E-07 | 7082/7048/51701/55    |         |       |
| hsa05010 | Alzheimer disease                      | 219/3698 | 6.16E-08 | 5.98E-07 | 3.37E-07 | 355/317/10105/20.219  |         |       |
| hsa05160 | Hepatitis C                            | 105/3698 | 6.17E-08 | 5.98E-07 | 3.37E-07 | 1869/1026/355/31.105  |         |       |
| hsa05203 | Viral carcinogenesis                   | 131/3698 | 6.39E-08 | 5.98E-07 | 3.37E-07 | 1026/1021/1027/8.131  |         |       |
| hsa05165 | Human papillomavirus infection         | 199/3698 | 6.48E-08 | 5.98E-07 | 3.37E-07 | 1869/1026/7422/3.199  |         |       |
| hsa05014 | Amyotrophic lateral sclerosis          | 216/3698 | 7.74E-08 | 6.95E-07 | 3.92E-07 | 317/596/1616/581.216  |         |       |
| hsa04722 | Neurotrophin signaling pathway         | 83/3698  | 9.00E-08 | 7.85E-07 | 4.43E-07 | 596/581/207/208/3.83  |         |       |
| hsa04066 | HIF-1 signaling pathway                | 77/3698  | 1.12E-07 | 9.46E-07 | 5.34E-07 | 1026/7422/3570/1.77   |         |       |
| hsa05222 | Small cell lung cancer                 | 67/3698  | 1.14E-07 | 9.46E-07 | 5.34E-07 | 1869/1026/317/10.67   |         |       |
| hsa04150 | mTOR signaling pathway                 | 103/3698 | 1.35E-07 | 1.07E-06 | 6.02E-07 | 5728/207/208/526.103  |         |       |
| hsa05162 | Measles                                | 94/3698  | 1.36E-07 | 1.07E-06 | 6.02E-07 | 355/317/1021/102.94   |         |       |
| hsa01521 | EGFR tyrosine kinase inhibitor resistε | 59/3698  | 1.50E-07 | 1.15E-06 | 6.50E-07 | 7422/3570/596/57.59   |         |       |
| hsa05166 | Human T-cell leukemia virus 1 infecti  | 138/3698 | 1.55E-07 | 1.17E-06 | 6.57E-07 | 1869/1026/898/70.138  |         |       |
| hsa04550 | Signaling pathways regulating pluripo  | 96/3698  | 1.72E-07 | 1.23E-06 | 6.96E-07 | 659/6774/648/90/5.96  |         |       |
| hsa05017 | Spinocerebellar ataxia                 | 96/3698  | 1.72E-07 | 1.23E-06 | 6.96E-07 | 10105/207/208/29.96   |         |       |
| hsa04210 | Apoptosis                              | 92/3698  | 1.80E-07 | 1.24E-06 | 7.01E-07 | 355/317/596/1616.92   |         |       |
| hsa05170 | Human immunodeficiency virus 1 infe    | 134/3698 | 1.81E-07 | 1.24E-06 | 7.01E-07 | 355/1073/596/581.134  |         |       |
| hsa05224 | Breast cancer                          | 97/3698  | 5.17E-07 | 3.48E-06 | 1.96E-06 | 3815/1869/1026/1.97   |         |       |
| hsa05418 | Fluid shear stress and atherosclerosis | 92/3698  | 8.26E-07 | 5.44E-06 | 3.07E-06 | 7422/659/596/235.92   |         |       |
| hsa01524 | Platinum drug resistance               | 54/3698  | 8.56E-07 | 5.53E-06 | 3.12E-06 | 1026/355/317/596.54   |         |       |
| hsa05219 | Bladder cancer                         | 34/3698  | 1.03E-06 | 6.50E-06 | 3.66E-06 | 1869/1026/7422/5.34   |         |       |
| hsa05214 | Glioma                                 | 55/3698  | 1.09E-06 | 6.74E-06 | 3.80E-06 | 1869/1026/1021/5.55   |         |       |
| hsa04370 | VEGF signaling pathway                 | 45/3698  | 1.69E-06 | 1.03E-05 | 5.80E-06 | 7422/207/208/842.45   |         |       |
| hsa05202 | Transcriptional misregulation in cancε | 120/3698 | 1.85E-06 | 1.10E-05 | 6.23E-06 | 3207/1026/1027/7.120  |         |       |
| hsa05135 | Yersinia infection                     | 86/3698  | 1.94E-06 | 1.14E-05 | 6.42E-06 | 2353/60/71/207/2.86   |         |       |
| hsa05216 | Thyroid cancer                         | 31/3698  | 2.03E-06 | 1.17E-05 | 6.60E-06 | 1026/595/581/149.31   |         |       |
| hsa04071 | Sphingolipid signaling pathway         | 79/3698  | 4.11E-06 | 2.33E-05 | 1.31E-05 | 596/5728/581/552.79   |         |       |
| hsa04919 | Thyroid hormone signaling pathway      | 80/3698  | 4.55E-06 | 2.49E-05 | 1.41E-05 | 117247/2099/595/80    |         |       |
| hsa04932 | Non-alcoholic fatty liver disease      | 96/3698  | 4.55E-06 | 2.49E-05 | 1.41E-05 | 355/3570/83737/7.96   |         |       |
| hsa05130 | Pathogenic Escherichia coli infection  | 119/3698 | 5.38E-06 | 2.90E-05 | 1.63E-05 | 7082/355/581/235.119  |         |       |
| hsa04015 | Rap1 signaling pathway                 | 128/3698 | 5.59E-06 | 2.96E-05 | 1.67E-05 | 3815/7422/7057/6.128  |         |       |
| hsa05164 | Influenza A                            | 107/3698 | 6.14E-06 | 3.16E-05 | 1.78E-05 | 355/317/1021/581.107  |         |       |
| hsa05142 | Chagas disease                         | 69/3698  | 6.16E-06 | 3.16E-05 | 1.78E-05 | 355/7048/7040/23.69   |         |       |
| hsa04012 | ErbB signaling pathway                 | 59/3698  | 8.37E-06 | 4.22E-05 | 2.38E-05 | 1026/1027/6776/2.59   |         |       |
| hsa04211 | Longevity regulating pathway           | 61/3698  | 1.12E-05 | 5.54E-05 | 3.13E-05 | 27244/581/6648/1.61   |         |       |

|                                                   |          |          |          |          |                      |
|---------------------------------------------------|----------|----------|----------|----------|----------------------|
| hsa05218 Melanoma                                 | 51/3698  | 1.39E-05 | 6.82E-05 | 3.84E-05 | 1869/1026/1021/5 51  |
| hsa04360 Axon guidance                            | 111/3698 | 1.57E-05 | 7.57E-05 | 4.27E-05 | 659/1073/6608/59 111 |
| hsa04144 Endocytosis                              | 146/3698 | 1.84E-05 | 8.74E-05 | 4.93E-05 | 83737/9146/7048/ 146 |
| hsa04810 Regulation of actin cytoskeleton         | 128/3698 | 2.10E-05 | 9.81E-05 | 5.53E-05 | 1073/60/71/324/9 128 |
| hsa05012 Parkinson disease                        | 146/3698 | 2.46E-05 | 0.000114 | 6.40E-05 | 317/1616/10105/5 146 |
| hsa05226 Gastric cancer                           | 93/3698  | 2.83E-05 | 0.000129 | 7.27E-05 | 1869/1026/1027/5 93  |
| hsa04137 Mitophagy - animal                       | 48/3698  | 2.88E-05 | 0.000129 | 7.30E-05 | 1869/598/1457/23 48  |
| hsa05230 Central carbon metabolism in cancer      | 49/3698  | 3.41E-05 | 0.00015  | 8.48E-05 | 3815/5728/207/20 49  |
| hsa04152 AMPK signaling pathway                   | 77/3698  | 3.45E-05 | 0.00015  | 8.48E-05 | 595/5520/31/207/ 77  |
| hsa03018 RNA degradation                          | 54/3698  | 3.98E-05 | 0.000172 | 9.67E-05 | 7832/694/1656/20 54  |
| hsa05221 Acute myeloid leukemia                   | 47/3698  | 4.51E-05 | 0.000192 | 0.000108 | 3815/595/6776/67 47  |
| hsa04151 PI3K-Akt signaling pathway               | 198/3698 | 5.85E-05 | 0.000245 | 0.000138 | 3815/1026/7422/3 198 |
| hsa05235 PD-L1 expression and PD-1 checkpo        | 59/3698  | 7.14E-05 | 0.000295 | 0.000167 | 5728/10125/2353/ 59  |
| hsa04660 T cell receptor signaling pathway        | 67/3698  | 9.14E-05 | 0.000374 | 0.000211 | 10125/2353/207/2 67  |
| hsa04917 Prolactin signaling pathway              | 48/3698  | 9.38E-05 | 0.000379 | 0.000214 | 9655/2099/595/23 48  |
| hsa04070 Phosphatidylinositol signaling system    | 63/3698  | 0.000103 | 0.000412 | 0.000232 | 5728/805/3612/36 63  |
| hsa04931 Insulin resistance                       | 69/3698  | 0.000106 | 0.000418 | 0.000236 | 5728/5465/6774/2 69  |
| hsa04213 Longevity regulating pathway - multip    | 43/3698  | 0.000144 | 0.000561 | 0.000316 | 6648/107/115/207 43  |
| hsa05100 Bacterial invasion of epithelial cells   | 49/3698  | 0.000182 | 0.000699 | 0.000394 | 60/71/391/857/99 49  |
| hsa04215 Apoptosis - multiple species             | 25/3698  | 0.000191 | 0.000726 | 0.000409 | 317/596/581/2711 25  |
| hsa04935 Growth hormone synthesis, secretion      | 74/3698  | 0.000215 | 0.000807 | 0.000455 | 2353/6776/6774/1 74  |
| hsa04910 Insulin signaling pathway                | 83/3698  | 0.00032  | 0.001188 | 0.00067  | 31/207/208/805/1 83  |
| hsa05231 Choline metabolism in cancer             | 62/3698  | 0.000348 | 0.001279 | 0.000721 | 2353/207/208/195 62  |
| hsa04620 Toll-like receptor signaling pathway     | 65/3698  | 0.000417 | 0.001512 | 0.000853 | 2353/9641/207/20 65  |
| hsa04912 GnRH signaling pathway                   | 59/3698  | 0.000432 | 0.001552 | 0.000875 | 107/115/805/998/ 59  |
| hsa04926 Relaxin signaling pathway                | 78/3698  | 0.000522 | 0.001852 | 0.001044 | 7422/59/7048/704 78  |
| hsa05020 Prion disease                            | 152/3698 | 0.000546 | 0.001917 | 0.001081 | 317/10105/581/29 152 |
| hsa04310 Wnt signaling pathway                    | 94/3698  | 0.000604 | 0.002099 | 0.001184 | 595/51701/324/89 94  |
| hsa05016 Huntington disease                       | 168/3698 | 0.0007   | 0.002406 | 0.001356 | 317/10105/581/66 168 |
| hsa04136 Autophagy - other                        | 24/3698  | 0.000747 | 0.002541 | 0.001433 | 2475/9140/9474/1 24  |
| hsa03015 mRNA surveillance pathway                | 60/3698  | 0.001002 | 0.003371 | 0.0019   | 5520/2107/4686/5 60  |
| hsa04530 Tight junction                           | 94/3698  | 0.001067 | 0.003552 | 0.002003 | 7082/595/5520/60 94  |
| hsa04611 Platelet activation                      | 74/3698  | 0.001215 | 0.004005 | 0.002258 | 10125/60/71/107/ 74  |
| hsa04340 Hedgehog signaling pathway               | 34/3698  | 0.001232 | 0.004017 | 0.002265 | 596/6608/595/156 34  |
| hsa04710 Circadian rhythm                         | 23/3698  | 0.001244 | 0.004017 | 0.002265 | 1385/1408/1454/5 23  |
| hsa04380 Osteoclast differentiation               | 76/3698  | 0.001286 | 0.004113 | 0.002319 | 7048/7040/2353/2 76  |
| hsa05120 Epithelial cell signaling in Helicobacte | 45/3698  | 0.001351 | 0.004279 | 0.002412 | 7082/526/528/836 45  |
| hsa04014 Ras signaling pathway                    | 129/3698 | 0.001491 | 0.004675 | 0.002636 | 3815/7422/5921/1 129 |
| hsa04064 NF-kappa B signaling pathway             | 63/3698  | 0.001625 | 0.004998 | 0.002818 | 596/142/331/472/ 63  |
| hsa04625 C-type lectin receptor signaling pathw   | 63/3698  | 0.001625 | 0.004998 | 0.002818 | 9641/207/208/805 63  |
| hsa04928 Parathyroid hormone synthesis, secre     | 64/3698  | 0.001685 | 0.005134 | 0.002894 | 1026/596/2353/10 64  |
| hsa04720 Long-term potentiation                   | 43/3698  | 0.001801 | 0.005412 | 0.003052 | 107/805/814/2776 43  |
| hsa04666 Fc gamma R-mediated phagocytosis         | 57/3698  | 0.00181  | 0.005412 | 0.003052 | 1073/4082/207/20 57  |
| hsa04662 B cell receptor signaling pathway        | 51/3698  | 0.001968 | 0.005833 | 0.003289 | 2353/207/208/975 51  |
| hsa04657 IL-17 signaling pathway                  | 57/3698  | 0.002569 | 0.007543 | 0.004252 | 2353/4312/9641/ 57   |
| hsa04664 Fc epsilon RI signaling pathway          | 43/3698  | 0.002748 | 0.007998 | 0.004509 | 207/208/2534/288 43  |
| hsa04114 Oocyte meiosis                           | 75/3698  | 0.003043 | 0.008777 | 0.004948 | 898/107/115/367/ 75  |
| hsa04392 Hippo signaling pathway - multiple sp    | 21/3698  | 0.003342 | 0.009552 | 0.005385 | 1454/4771/6788/7 21  |
| hsa00310 Lysine degradation                       | 40/3698  | 0.00343  | 0.00972  | 0.00548  | 38/223/1892/2145 40  |
| hsa04540 Gap junction                             | 53/3698  | 0.004376 | 0.012292 | 0.00693  | 7082/107/115/983 53  |
| hsa00562 Inositol phosphate metabolism            | 45/3698  | 0.004523 | 0.012594 | 0.007101 | 5728/3612/3636/3 45  |
| hsa04371 Apelin signaling pathway                 | 78/3698  | 0.005415 | 0.014949 | 0.008428 | 59/595/1490/182/ 78  |
| hsa04670 Leukocyte transendothelial migration     | 66/3698  | 0.005994 | 0.016408 | 0.009251 | 60/71/399/998/14 66  |
| hsa05134 Legionellosis                            | 36/3698  | 0.006096 | 0.016546 | 0.009328 | 317/836/840/841/ 36  |
| hsa05217 Basal cell carcinoma                     | 39/3698  | 0.007184 | 0.019337 | 0.010902 | 1026/6608/581/32 39  |
| hsa04914 Progesterone-mediated oocyte matur       | 58/3698  | 0.009137 | 0.02439  | 0.013751 | 993/107/115/207/ 58  |
| hsa03030 DNA replication                          | 24/3698  | 0.009265 | 0.02453  | 0.01383  | 2237/4172/4174/4 24  |
| hsa04621 NOD-like receptor signaling pathway      | 99/3698  | 0.009364 | 0.024591 | 0.013864 | 596/9641/331/598 99  |
| hsa04730 Long-term depression                     | 37/3698  | 0.009515 | 0.024786 | 0.013974 | 2771/2773/2776/2 37  |
| hsa04072 Phospholipase D signaling pathway        | 82/3698  | 0.011281 | 0.02915  | 0.016435 | 3815/107/115/207 82  |
| hsa04916 Melanogenesis                            | 58/3698  | 0.012021 | 0.030817 | 0.017374 | 3815/107/115/805 58  |
| hsa05110 Vibrio cholerae infection                | 31/3698  | 0.015264 | 0.038822 | 0.021888 | 7082/60/71/115/5 31  |
| hsa00513 Various types of N-glycan biosynthes     | 25/3698  | 0.016205 | 0.040503 | 0.022835 | 1603/1650/2683/4 25  |
| hsa00620 Pyruvate metabolism                      | 25/3698  | 0.016205 | 0.040503 | 0.022835 | 31/38/97/223/273 25  |
| hsa05145 Toxoplasmosis                            | 63/3698  | 0.016302 | 0.040503 | 0.022835 | 596/10105/7040/6 63  |
| hsa03013 RNA transport                            | 100/3698 | 0.016654 | 0.041063 | 0.023151 | 1915/1917/1964/1 100 |
| hsa04728 Dopaminergic synapse                     | 73/3698  | 0.01706  | 0.041367 | 0.023323 | 2353/5520/207/20 73  |
| hsa00020 Citrate cycle (TCA cycle)                | 20/3698  | 0.017102 | 0.041367 | 0.023323 | 4190/4191/5160/5 20  |

|                                     |         |          |          |          |                     |
|-------------------------------------|---------|----------|----------|----------|---------------------|
| hsa04915 Estrogen signaling pathway | 76/3698 | 0.017162 | 0.041367 | 0.023323 | 596/2099/2353/1076  |
| hsa03440 Homologous recombination   | 26/3698 | 0.017318 | 0.041435 | 0.023361 | 472/580/641/672/626 |
| hsa04022 cGMP-PKG signaling pathway | 90/3698 | 0.020672 | 0.049097 | 0.02768  | 10105/107/115/1490  |
| hsa04934 Cushing syndrome           | 84/3698 | 0.020978 | 0.049459 | 0.027885 | 1869/1026/1021/184  |

---

**Table S5. HALLMARK terms enriched among the miRNA targeted genes.**

| <b>ID</b>                                  | <b>Description</b>                         | <b>GeneRatio</b> | <b>P-value</b> | <b>P-adjust</b> | <b>Q-value</b> |
|--------------------------------------------|--------------------------------------------|------------------|----------------|-----------------|----------------|
| HALLMARK_E2F_TARGETS                       | HALLMARK_E2F_TARGETS                       | 171/2535         | 6.05E-18       | 3.02E-16        | 1.78E-16       |
| HALLMARK_G2M_CHECKPOINT                    | HALLMARK_G2M_CHECKPOINT                    | 169/2535         | 1.14E-16       | 2.86E-15        | 1.68E-15       |
| HALLMARK_MTORC1_SIGNALING                  | HALLMARK_MTORC1_SIGNALING                  | 165/2535         | 2.60E-14       | 4.33E-13        | 2.55E-13       |
| HALLMARK_MYC_TARGETS_V1                    | HALLMARK_MYC_TARGETS_V1                    | 163/2535         | 3.17E-13       | 3.96E-12        | 2.33E-12       |
| HALLMARK_TNFA_SIGNALING_VIA_NFKB           | HALLMARK_TNFA_SIGNALING_VIA_NFKB           | 159/2535         | 3.17E-11       | 3.17E-10        | 1.87E-10       |
| HALLMARK_UV_RESPONSE_DN                    | HALLMARK_UV_RESPONSE_DN                    | 114/2535         | 3.50E-08       | 2.91E-07        | 1.72E-07       |
| HALLMARK_MITOTIC_SPINDLE                   | HALLMARK_MITOTIC_SPINDLE                   | 151/2535         | 4.17E-08       | 2.98E-07        | 1.76E-07       |
| HALLMARK_TGF_BETA_SIGNALING                | HALLMARK_TGF_BETA_SIGNALING                | 46/2535          | 1.39E-05       | 8.71E-05        | 5.13E-05       |
| HALLMARK_PROTEIN_SECRETION                 | HALLMARK_PROTEIN_SECRETION                 | 74/2535          | 5.25E-05       | 0.00029         | 0.00017        |
| HALLMARK_UNFOLDED_PROTEIN_RESPONSE         | HALLMARK_UNFOLDED_PROTEIN_RESPONSE         | 85/2535          | 7.31E-05       | 0.00037         | 0.00022        |
| HALLMARK_APOPTOSIS                         | HALLMARK_APOPTOSIS                         | 116/2535         | 0.0001         | 0.00046         | 0.00027        |
| HALLMARK_ANDROGEN_RESPONSE                 | HALLMARK_ANDROGEN_RESPONSE                 | 74/2535          | 0.00051        | 0.00212         | 0.00125        |
| HALLMARK_INTERFERON_ALPHA_RESPONSE         | HALLMARK_INTERFERON_ALPHA_RESPONSE         | 71/2535          | 0.00111        | 0.00426         | 0.00251        |
| HALLMARK_EPITHELIAL_MESENCHYMAL_TRANSITION | HALLMARK_EPITHELIAL_MESENCHYMAL_TRANSITION | 135/2535         | 0.00263        | 0.0094          | 0.00554        |
| HALLMARK_INTERFERON_GAMMA_RESPONSE         | HALLMARK_INTERFERON_GAMMA_RESPONSE         | 134/2535         | 0.00415        | 0.01382         | 0.00815        |
| HALLMARK_NOTCH_SIGNALING                   | HALLMARK_NOTCH_SIGNALING                   | 26/2535          | 0.00455        | 0.01421         | 0.00837        |
| HALLMARK_P53_PATHWAY                       | HALLMARK_P53_PATHWAY                       | 131/2535         | 0.01428        | 0.04199         | 0.02475        |
